# Supplementary material for: Single-Cell Transcriptomics Highlights Macrophage-Driven Regulation of EndMT and Repair in Injured Muscle
Source: Research Square preprint supplement (doi:10.21203/rs.3.rs-6288736/v1), 2025-04-24
Supplement: Supplementary file 1 [file 5155d694aa4bef0e08cc8043.xlsx]

## Sheet: GO_BP
ID	Description	setSize	enrichmentScore	NES	pvalue	p.adjust	qvalue	rank	leading_edge	core_enrichment
GO:0032543	mitochondrial translation	128	0.664862	2.05602	7.77181e-08	7.77181e-08	0.000180726	3495	tags=62%, list=24%, signal=47%	Mrpl41/Mrps6/Mrps28/Mrpl20/Mrpl54/Mrpl12/Lrpprc/Mrpl51/Mrps12/Mrpl14/Mrps10/Gadd45gip1/Mrps14/C1qbp/Mrpl34/Uqcc2/Mrpl57/Mrpl43/Aurkaip1/Mrps15/Dap3/Coa3/Mrpl18/Mrps26/Mrps34/Mrpl28/Shmt2/Mrps25/Mrpl13/Mrpl22/Mrpl49/Chchd1/Mrps24/Mrps17/Mrpl21/Mrpl40/Mrpl38/Mrps18b/Mrpl33/Mrpl17/Mrpl36/Rcc1l/Mrps7/Mrpl53/Mrps18a/Mrpl46/Mrpl55/Mrpl19/Yars2/Mrps30/Mrpl42/Mrpl39/Mrps33/Mrpl35/Mrps16/Mrpl4/Mrpl58/Mrpl…
GO:0045087	innate immune response	718	-0.525952	-1.6345	1.16962e-07	1.16962e-07	0.000180726	1427	tags=25%, list=10%, signal=23%	Pde12/C2/H2-Q10/Gramd4/Itch/Cybb/Clec2d/Slc11a1/Tifa/Wfdc18/Map3k5/Cybc1/Trim41/Trim14/Ifi214/Spon2/Oas1a/Rab11fip2/Sec14l1/Pparg/Matr3/Zbtb1/Cd274/Senp7/Syk/Ticam2/Ccl11/Pum2/Nr1d1/C1qc/Cx3cr1/Rnf166/Cebpg/Dtx4/Mefv/Trim11/Nmi/Isg20/Trim34a/Dab2ip/Trim8/Herc6/Gbp7/Zyx/Pcbp2/Lgals9/Irf5/Wfdc17/Cd47/Casp8/Gsdmd/Pld3/Ifi35/Hck/Tap2/Casp6/Rab20/Tnfaip8l2/Eif2ak2/Ifnar2/Cgas/Ang/Rpl39/Csf1r/Rarres2/R…
GO:0050778	positive regulation of immune response	598	-0.547503	-1.68882	1.18421e-07	1.18421e-07	0.000180726	1448	tags=22%, list=10%, signal=21%	P2rx7/Lbp/C2/H2-Q10/Laptm5/Gramd4/Itch/Slc11a1/Tifa/Trim41/Ifi214/Oas1a/Rab11fip2/Lcp2/Sec14l1/Matr3/Cd40/Zbtb1/Cd274/Syk/Ticam2/Pum2/C3ar1/Il15/Sash3/Nr1d1/H2-T24/C1qc/Kmt5c/Mefv/Trim11/Nmi/Dab2ip/Gbp7/Pcbp2/Lgals9/Lpxn/Cd47/Klhl6/Ifi35/Tap2/Casp6/Tnfrsf21/Eif2ak2/Cgas/C5ar2/Trim25/Mef2c/Nfam1/Tlr7/Cd14/Myd88/Pde4b/Nfkbid/B2m/Cd79b/Znfx1/Trim12a/Stat5b/Dusp22/Fcgr3/Il4ra/Irak2/Irf2/Gbp3/Hlx/Denn…
GO:0001816	cytokine production	741	-0.523447	-1.63018	1.41513e-07	1.41513e-07	0.000180726	1318	tags=21%, list=9%, signal=20%	Ifi214/Spon2/Oas1a/Rad21/Kdelr1/Nfatc1/Laptm4b/Lcp2/Ash1l/Pparg/Cd40/Zbtb1/Cd274/Syk/Ticam2/Hilpda/C3ar1/Il15/Sash3/Sod1/Cx3cr1/Cebpg/Mefv/Il6ra/Nmi/Casp3/Zbtb34/Litaf/Lgals9/Irf5/Prg4/Cd47/Casp8/Gsdmd/Gstp1/Grk2/Per1/Sptbn1/Abcc9/Frmd8/Pld3/Adcy7/Bank1/Tnfrsf21/Eif2ak2/Cgas/Abcd1/Maf/Pdcd4/Csf1r/Elf4/Siglec1/Osm/C5ar2/Nfam1/Tlr7/Zbtb7b/Stat3/Cd14/Myd88/Zbtb20/Pde4b/B2m/Irf9/Tnfrsf1a/Naip5/Cd300c…
GO:0001817	regulation of cytokine production	679	-0.528456	-1.64215	2.75938e-07	2.75938e-07	0.000225217	1214	tags=20%, list=8%, signal=19%	Pparg/Cd40/Zbtb1/Cd274/Syk/Ticam2/Hilpda/C3ar1/Il15/Sash3/Sod1/Cx3cr1/Cebpg/Mefv/Il6ra/Nmi/Casp3/Zbtb34/Litaf/Lgals9/Irf5/Prg4/Cd47/Casp8/Gsdmd/Gstp1/Grk2/Per1/Sptbn1/Pld3/Adcy7/Bank1/Tnfrsf21/Eif2ak2/Cgas/Abcd1/Pdcd4/Csf1r/Elf4/Siglec1/Osm/C5ar2/Nfam1/Tlr7/Zbtb7b/Stat3/Cd14/Myd88/Zbtb20/Pde4b/B2m/Tnfrsf1a/Naip5/Cd300c2/Stat5b/Pld4/Fcgr3/Il4ra/Bcl6/F11r/Klf2/Ifngr1/Dennd1b/Csk/Cmklr1/Tut4/Sorl1/C…
GO:0002832	negative regulation of response to biotic stimulus	115	-0.742077	-1.95693	2.85239e-07	2.85239e-07	0.000225217	595	tags=27%, list=4%, signal=26%	Adar/Trib1/Dhx58/Parp14/Trafd1/Igtp/H2-K1/Irgm2/H2-D1/Serping1/Tap1/Ifi204/Samhd1/Fgl2/H2-T22/Nlrc5/Ifi203/H2-Q4/H2-Q6/Stat2/H2-Q7/Mndal/Irgm1/Ifi211/H2-T23/Ifi209/Oas1g/Oas3/Igf2/Ifi206/Ifi213
GO:0050776	regulation of immune response	733	-0.519149	-1.61597	3.08612e-07	3.08612e-07	0.000225217	1448	tags=22%, list=10%, signal=21%	P2rx7/Lbp/Tnfrsf1b/C2/H2-Q10/Cd37/Laptm5/Gramd4/Itch/Clec2d/Slc11a1/Tifa/Trim41/Ifi214/Oas1a/Rab11fip2/Dnase2a/Lcp2/Sec14l1/Pparg/Matr3/Cd40/Zbtb1/Cd274/Syk/Ticam2/Pum2/C3ar1/Il15/Sash3/Nr1d1/H2-T24/C1qc/Kmt5c/Dtx4/Mefv/Trim11/Nmi/Dab2ip/Gbp7/Pcbp2/Lgals9/Lpxn/Cd47/Casp8/Klhl6/Adcy7/Ifi35/Tap2/Phf11a/Casp6/Samsn1/Tnfrsf21/Eif2ak2/Cgas/Hcst/C5ar2/Trim25/Mef2c/Nfam1/Tlr7/Zbtb7b/Cd14/Myd88/Pde4b/Nfk…
GO:0009150	purine ribonucleotide metabolic process	321	0.49813	1.70499	7.08683e-07	7.08683e-07	0.000452531	1880	tags=27%, list=13%, signal=24%	Aldoc/Pgk1/Pkm/Aldoa/Tpi1/Ampd3/Pfkl/Pgam1/Pdk1/Nupr1/Eno1/Gapdh/Mvd/Myc/Hmgcs1/Nme1/Vcp/Pfkp/Ran/Ndufab1/Aprt/Pmvk/Nme2/Acsl1/Ndufb8/Dnm1l/Ndufb9/Gpi1/Atp6v1a/Hif1a/Itpa/Ndufb10/Impdh1/Ndufb6/Ndufs5/Bcl2l1/Gmpr/Gnai3/Galk1/Pank3/Ndufc1/Mpc1/Clpx/Hsd17b4/Atp7a/Ndufa8/Stoml2/Ndufs8/Nudt2/Eif6/Pdk3/Nudt3/Parg/Mthfd1/Acot7/Hdac4/Ndufs7/Mcee/Papss1/Ndufb7/Hk3/Ndufv2/Htr2a/Mpc2/Xdh/Hmgcr/Ola1/Cs/Ndufs…
GO:0007156	homophilic cell adhesion via plasma membrane adhesion molecules	58	-0.81987	-1.97612	8.99632e-07	8.99632e-07	0.000510633	100	tags=9%, list=1%, signal=9%	Nectin4/Pecam1/Hmcn2/Esam/Cdh5
GO:0009117	nucleotide metabolic process	450	0.454952	1.60657	1.18176e-06	1.18176e-06	0.000603693	1823	tags=25%, list=12%, signal=22%	Aldoc/Pgk1/Pkm/Aldoa/Tpi1/Ampd3/Pfkl/Pgam1/Pdk1/Ldha/Nupr1/Eno1/Gapdh/Mvd/Txnrd1/Tk1/Myc/Hmgcs1/Nme1/Vcp/Pfkp/Ran/Ndufab1/Pgd/Aprt/Park7/Pmvk/Nme2/Dtymk/Dera/Acsl1/Ndufb8/Dnm1l/Ndufb9/Dut/Fdx1/Gpi1/Atp6v1a/Hif1a/Itpa/Ndufb10/Kcnab2/Impdh1/Ndufb6/Mthfd2l/Ndufs5/Bcl2l1/Noct/Gmpr/Gnai3/Rrm1/Galk1/Pank3/Ndufc1/Mpc1/Clpx/Hsd17b4/Atp7a/Dnph1/Ndufa8/Tkt/Stoml2/Pgls/Ndufs8/Nudt2/Eif6/Uck2/Pdk3/Nudt3/Oga/…
GO:0019693	ribose phosphate metabolic process	351	0.48836	1.68239	1.33239e-06	1.33239e-06	0.000618766	2051	tags=28%, list=14%, signal=25%	Aldoc/Pgk1/Pkm/Aldoa/Tpi1/Ampd3/Pfkl/Pgam1/Pdk1/Nupr1/Eno1/Gapdh/Mvd/Myc/Hmgcs1/Nme1/Vcp/Pfkp/Ran/Ndufab1/Aprt/Pmvk/Nme2/Acsl1/Ndufb8/Dnm1l/Ndufb9/Gpi1/Atp6v1a/Hif1a/Itpa/Ndufb10/Impdh1/Ndufb6/Ndufs5/Bcl2l1/Gmpr/Gnai3/Galk1/Pank3/Ndufc1/Mpc1/Clpx/Hsd17b4/Atp7a/Ndufa8/Tkt/Stoml2/Ndufs8/Nudt2/Eif6/Uck2/Pdk3/Nudt3/Parg/Mthfd1/Acot7/Hdac4/Ndufs7/Mcee/Papss1/Ndufb7/Hk3/Ndufv2/Htr2a/Mpc2/Taldo1/Xdh/Hmg…
GO:0009259	ribonucleotide metabolic process	339	0.491374	1.68942	1.46262e-06	1.46262e-06	0.000622642	2051	tags=28%, list=14%, signal=25%	Aldoc/Pgk1/Pkm/Aldoa/Tpi1/Ampd3/Pfkl/Pgam1/Pdk1/Nupr1/Eno1/Gapdh/Mvd/Myc/Hmgcs1/Nme1/Vcp/Pfkp/Ran/Ndufab1/Aprt/Pmvk/Nme2/Acsl1/Ndufb8/Dnm1l/Ndufb9/Gpi1/Atp6v1a/Hif1a/Itpa/Ndufb10/Impdh1/Ndufb6/Ndufs5/Bcl2l1/Gmpr/Gnai3/Galk1/Pank3/Ndufc1/Mpc1/Clpx/Hsd17b4/Atp7a/Ndufa8/Stoml2/Ndufs8/Nudt2/Eif6/Uck2/Pdk3/Nudt3/Parg/Mthfd1/Acot7/Hdac4/Ndufs7/Mcee/Papss1/Ndufb7/Hk3/Ndufv2/Htr2a/Mpc2/Xdh/Hmgcr/Ola1/Cs/…
GO:0009617	response to bacterium	507	-0.533432	-1.63177	2.75987e-06	2.75987e-06	0.00087768	1053	tags=21%, list=7%, signal=21%	Dab2ip/Herc6/Gbp7/Litaf/Lgals9/Irf5/Rgs1/Wfdc17/Cd47/Klhl6/Gsdmd/Slc9a9/Gstp1/Abca1/Cd52/Hck/Tap2/Bank1/Plscr4/Lyz2/Eif2ak2/Ang/Rpl39/Slc30a1/Pdcd4/Rarres2/Mef2c/Cd14/Myd88/Pde4b/B2m/Trib1/Cd79b/Tnfrsf1a/Znfx1/Trim12a/Naip5/Stat5b/Scarb1/Irak2/Gbp3/Tut4/Cfb/Psmb9/Cebpb/Trim12c/Dhx58/Igtp/Rara/Nr4a1/H2-K1/Tlr1/Notch2/Irgm2/H2-D1/Fcgr2b/Ly96/Zfp36/Ifi204/Fosl2/Sp110/Trim30a/Cd300lb/Ptafr/Gbp2/H2-M3…
GO:0006753	nucleoside phosphate metabolic process	455	0.441102	1.55846	2.81364e-06	2.81364e-06	0.00087768	1823	tags=24%, list=12%, signal=22%	Aldoc/Pgk1/Pkm/Aldoa/Tpi1/Ampd3/Pfkl/Pgam1/Pdk1/Ldha/Nupr1/Eno1/Gapdh/Mvd/Txnrd1/Tk1/Myc/Hmgcs1/Nme1/Vcp/Pfkp/Ran/Ndufab1/Pgd/Aprt/Park7/Pmvk/Nme2/Dtymk/Dera/Acsl1/Ndufb8/Dnm1l/Ndufb9/Dut/Fdx1/Gpi1/Atp6v1a/Hif1a/Itpa/Ndufb10/Kcnab2/Impdh1/Ndufb6/Mthfd2l/Ndufs5/Bcl2l1/Noct/Gmpr/Gnai3/Rrm1/Galk1/Pank3/Ndufc1/Mpc1/Clpx/Hsd17b4/Atp7a/Dnph1/Ndufa8/Tkt/Stoml2/Pgls/Ndufs8/Nudt2/Eif6/Uck2/Pdk3/Nudt3/Oga/…
GO:0016064	immunoglobulin mediated immune response	118	-0.720077	-1.90385	2.83441e-06	2.83441e-06	0.00087768	630	tags=25%, list=4%, signal=25%	Myd88/Fcgr3/Il4ra/Bcl6/H2-K1/Pou2f2/H2-D1/Fcgr2b/Csf3r/Serping1/Csf2rb/C1ra/Icosl/Fgl2/Bcl3/H2-T22/Fcgr1/H2-Q4/H2-Q6/Cd28/H2-Q7/Fcgr4/Batf/H2-T23/H2-DMa/Cd74/Ighm/Irf7/H2-Ab1/C1s1
GO:0045824	negative regulation of innate immune response	92	-0.756379	-1.92711	2.84252e-06	2.84252e-06	0.00087768	430	tags=28%, list=3%, signal=28%	Adar/Dhx58/Parp14/Trafd1/H2-K1/H2-D1/Serping1/Tap1/Ifi204/Samhd1/H2-T22/Nlrc5/Ifi203/H2-Q4/H2-Q6/Stat2/H2-Q7/Mndal/Ifi211/H2-T23/Ifi209/Oas1g/Oas3/Igf2/Ifi206/Ifi213
GO:0019724	B cell mediated immunity	120	-0.719315	-1.9098	2.92078e-06	2.92078e-06	0.00087768	630	tags=25%, list=4%, signal=24%	Myd88/Fcgr3/Il4ra/Bcl6/H2-K1/Pou2f2/H2-D1/Fcgr2b/Csf3r/Serping1/Csf2rb/C1ra/Icosl/Fgl2/Bcl3/H2-T22/Fcgr1/H2-Q4/H2-Q6/Cd28/H2-Q7/Fcgr4/Batf/H2-T23/H2-DMa/Cd74/Ighm/Irf7/H2-Ab1/C1s1
GO:0044283	small molecule biosynthetic process	416	0.458845	1.61612	3.95882e-06	3.95882e-06	0.0010562	1413	tags=19%, list=10%, signal=18%	Dhcr24/Fdps/Aldoc/Edn1/Idi1/Pgk1/Dhrs9/Pkm/Cyp51/Aldoa/Tpi1/Tnf/Pgam1/Ass1/Mif/Msmo1/Atp2b4/Ldha/Eno1/Gapdh/Mvd/Mgst3/Wnt4/Anxa1/Tk1/Slc38a1/Sirt1/Srebf2/Hmgcs1/Ndufab1/Fads1/Pgd/Aprt/Park7/Hsd17b12/Alox5/Pmvk/Pgp/Rest/Dtymk/Nus1/Fabp5/Myh9/Stard4/Coq7/Insig1/Prxl2b/Nfkb1/Cyb5r3/Per2/Bcat2/Fdft1/Atf4/Gpi1/Alox5ap/Hif1a/Mthfd2l/Nln/Spp1/Por/Dnph1/Got2/Degs1/Shmt2/Eif6/Gch1/Nr1h3/Ddb1/Mthfd1/Acot7/…
GO:0042501	serine phosphorylation of STAT protein	10	0.954346	1.91141	4.10927e-06	4.10927e-06	0.0010562	172	tags=40%, list=1%, signal=40%	Ifnb1/Cdk5r1/Gadd45a/Ercc6
GO:0055086	nucleobase-containing small molecule metabolic process	497	0.426615	1.51443	4.13515e-06	4.13515e-06	0.0010562	2051	tags=25%, list=14%, signal=23%	Aldoc/Pgk1/Pkm/Aldoa/Tpi1/Ampd3/Pfkl/Pgam1/Pdk1/Ldha/Nupr1/Eno1/Gapdh/Mvd/Txnrd1/Tk1/Myc/Hmgcs1/Nme1/Vcp/Pfkp/Ran/Ndufab1/Pgd/Ugp2/Aprt/Park7/Pmvk/Nme2/Dtymk/Dera/Acsl1/Ndufb8/Dnm1l/Ndufb9/Dut/Fdx1/Gpi1/Atp6v1a/Hif1a/Itpa/Ndufb10/Kcnab2/Impdh1/Ndufb6/Mthfd2l/Ndufs5/Bcl2l1/Noct/Gmpr/Gnai3/Rrm1/Uap1l1/Galk1/Pank3/Ndufc1/Mpc1/Clpx/Icmt/Hsd17b4/Atp7a/Dnph1/Ndufa8/Tkt/Stoml2/Pcmt1/Pgls/Ndufs8/Nudt2/Ei…
GO:0001525	angiogenesis	460	-0.536837	-1.63087	5.75966e-06	5.75966e-06	0.00140109	1291	tags=20%, list=9%, signal=18%	Glul/Cdh13/Sema5a/Mcam/Pknox1/Pparg/Cd40/Mmp19/Flcn/Nrp1/Syk/Ednra/Calcrl/Ccl11/C3ar1/Ccm2/Cx3cr1/Pxn/Dab2ip/Tcf4/Rhoj/Cd47/Casp8/Tnfaip2/Tgfbr2/Hs6st1/Amot/Rasip1/Stk4/Sh2b3/Hhex/Ang/Eng/Stat3/Rhob/Acvrl1/Tnfrsf1a/Adamts1/Ccl24/Ctsh/Btg1/Dcn/Klf2/Nfe2l2/Hspg2/Foxj2/Nr4a1/Hpse/Notch2/Pik3cd/Sema4a/Vegfa/Ramp1/Notch1/Jup/Vav2/Pml/Kdr/Mmp2/Col18a1/Smoc2/Thbs1/Rnf213/Cxcr4/Stat1/Sp100/Tgfbr3/Pdgfrb/…
GO:0035239	tube morphogenesis	766	-0.491349	-1.53219	6.51584e-06	6.51584e-06	0.00150406	1274	tags=16%, list=9%, signal=15%	Cdh13/Nfatc1/Sema5a/Mcam/Pknox1/Pparg/Cd40/Mmp19/Flcn/Nrp1/Rarg/Syk/Ednra/Calcrl/Ccl11/Kdm5b/C3ar1/Rin2/Ccm2/Cx3cr1/Pxn/Casp3/Dab2ip/Apaf1/Tcf4/Rhoj/Ncoa3/Cd47/Casp8/Tnfaip2/Tgfbr2/Hs6st1/Amot/Tgif1/Arid1a/Rasip1/Stk4/Prrx1/Sh2b3/Egfr/Kat6a/Hhex/Ang/Eng/Mthfr/Mef2c/Stat3/Rhob/Acvrl1/Tnfrsf1a/Sox4/Ctns/Adamts1/Ccl24/Ctsh/Btg1/Dcn/Klf2/Nfe2l2/Hlx/Hspg2/Foxj2/Pbx1/Junb/Rara/Nr4a1/Hpse/Notch2/Pik3cd/…
GO:0019884	antigen processing and presentation of exogenous antigen	42	-0.842274	-1.93163	6.77183e-06	6.77183e-06	0.00150406	876	tags=52%, list=6%, signal=49%	Ctss/Tap2/B2m/Fcgr3/Psme1/H2-K1/H2-D1/Fcgr2b/Unc93b1/H2-M3/H2-T22/Fcgr1/H2-Q4/H2-Q6/H2-Q7/H2-T23/H2-DMa/Cd74/H2-Eb1/H2-DMb1/H2-Aa/H2-Ab1
GO:0002253	activation of immune response	446	-0.544185	-1.64894	7.34658e-06	7.34658e-06	0.00153433	1419	tags=22%, list=10%, signal=21%	C2/H2-Q10/Laptm5/Gramd4/Itch/Tifa/Ifi214/Oas1a/Rab11fip2/Lcp2/Sec14l1/Matr3/Cd274/Syk/Ticam2/Pum2/C3ar1/Nr1d1/C1qc/Mefv/Trim11/Nmi/Dab2ip/Gbp7/Pcbp2/Lpxn/Cd47/Klhl6/Ifi35/Casp6/Tnfrsf21/Eif2ak2/Cgas/C5ar2/Trim25/Mef2c/Nfam1/Tlr7/Cd14/Myd88/Pde4b/Nfkbid/Cd79b/Znfx1/Trim12a/Dusp22/Irak2/Irf2/Gbp3/Dennd1b/Csk/Cmklr1/Cfb/Usp12/Trim12c/Dhx58/Igtp/H2-K1/Tlr1/Irgm2/H2-D1/Serping1/Ly96/C1ra/Ifi204/Fosl2/…
GO:0022613	ribonucleoprotein complex biogenesis	415	0.450569	1.58307	7.59625e-06	7.59625e-06	0.00153433	3152	tags=40%, list=21%, signal=32%	Rrs1/Utp18/Nop56/Lsm4/Nat10/Nhp2/Rps19bp1/Ran/Ebna1bp2/Nol8/Pop5/Mrpl20/Hsp90aa1/Dhx29/Nop16/Bop1/Tma16/Eif3a/Abce1/Usp16/C1qbp/Mrto4/Mphosph10/Gtf2h5/Gcfc2/Riok3/Ncl/Ddx54/Lyar/Srsf1/Nol7/Riox2/Pop7/Snrpd1/Bysl/Imp4/Utp11/Wdr12/Utp6/Srsf10/Utp15/Ddx21/Eif6/Sde2/Prpf39/Srpk2/Wdr43/Dhx9/Rps7/Ptges3/Rrp7a/Ftsj3/Mettl16/Nufip1/Grwd1/Mybbp1a/Denr/Strap/Rrp1/Brix1/Rps5/Ddx31/Dcaf13/Tarbp2/Srpk1/Cdc73/…
GO:0006163	purine nucleotide metabolic process	404	0.455482	1.59704	7.80917e-06	7.80917e-06	0.00153433	1731	tags=25%, list=12%, signal=22%	Aldoc/Pgk1/Pkm/Aldoa/Tpi1/Ampd3/Pfkl/Pgam1/Pdk1/Ldha/Nupr1/Eno1/Gapdh/Mvd/Txnrd1/Myc/Hmgcs1/Nme1/Vcp/Pfkp/Ran/Ndufab1/Pgd/Aprt/Pmvk/Nme2/Acsl1/Ndufb8/Dnm1l/Ndufb9/Fdx1/Gpi1/Atp6v1a/Hif1a/Itpa/Ndufb10/Kcnab2/Impdh1/Ndufb6/Mthfd2l/Ndufs5/Bcl2l1/Noct/Gmpr/Gnai3/Galk1/Pank3/Ndufc1/Mpc1/Clpx/Hsd17b4/Atp7a/Dnph1/Ndufa8/Tkt/Stoml2/Pgls/Ndufs8/Nudt2/Eif6/Pdk3/Nudt3/Oga/Parg/Mthfd1/Acot7/Hdac4/Ndufs7/Mcee…
GO:0045088	regulation of innate immune response	389	-0.551987	-1.65503	8.70305e-06	8.70305e-06	0.00159116	1404	tags=23%, list=10%, signal=22%	H2-Q10/Gramd4/Itch/Clec2d/Tifa/Trim41/Ifi214/Oas1a/Rab11fip2/Sec14l1/Pparg/Matr3/Cd274/Syk/Ticam2/Pum2/Nr1d1/Dtx4/Mefv/Trim11/Nmi/Dab2ip/Gbp7/Pcbp2/Lgals9/Casp8/Ifi35/Tap2/Casp6/Eif2ak2/Cgas/Trim25/Tlr7/Cd14/Myd88/Adar/Znfx1/Trim12a/Stat5b/Irak2/Irf2/Gbp3/Nfe2l2/Trim12c/Dhx58/Parp14/Trafd1/Igtp/H2-K1/Tlr1/Irgm2/H2-D1/Serping1/Ly96/Tap1/Ifi204/Samhd1/Unc93b1/Trim30a/Gbp2/H2-M3/H2-T22/Parp9/Irf1/Nl…
GO:0031347	regulation of defense response	662	-0.498526	-1.54904	8.7214e-06	8.7214e-06	0.00159116	1445	tags=21%, list=10%, signal=20%	Lbp/Tnfrsf1b/Tbc1d23/Pde2a/H2-Q10/Cd37/Gramd4/Itch/Clec2d/Tifa/Trim41/Ifi214/Oas1a/Sharpin/Rab11fip2/Sec14l1/Ash1l/Akna/Pparg/Matr3/Cd274/Syk/Ticam2/Pum2/Aoc3/Il15/Nr1d1/Sod1/Cx3cr1/Dtx4/Mefv/Trim11/Nmi/Dab2ip/Gbp7/Casp12/Pcbp2/Abhd12/Lgals9/Cebpa/Cd47/Casp8/Gsdmd/Gstp1/Ctss/Il10ra/Ifi35/Tap2/Casp6/Tnfaip8l2/Eif2ak2/Cgas/Pdcd4/Mgll/Csf1r/Elf4/Daglb/Osm/Trim25/Mef2c/Tlr7/Stat3/Cd14/Myd88/Adar/Tnfr…
GO:0009199	ribonucleoside triphosphate metabolic process	200	0.537345	1.7455	1.05381e-05	1.05381e-05	0.00185631	1880	tags=32%, list=13%, signal=28%	Aldoc/Pgk1/Pkm/Aldoa/Tpi1/Ampd3/Pfkl/Pgam1/Nupr1/Eno1/Gapdh/Myc/Nme1/Vcp/Pfkp/Ran/Ndufab1/Nme2/Ndufb8/Dnm1l/Ndufb9/Gpi1/Atp6v1a/Hif1a/Itpa/Ndufb10/Impdh1/Ndufb6/Ndufs5/Bcl2l1/Gnai3/Galk1/Ndufc1/Clpx/Atp7a/Ndufa8/Stoml2/Ndufs8/Nudt2/Eif6/Uck2/Parg/Hdac4/Ndufs7/Ndufb7/Hk3/Ndufv2/Htr2a/Ola1/Ndufs6/Nudt5/Slc25a13/Ndufb2/Hk1/Ndufb5/App/Ndufs1/Tspo/Atp6v1b2/Bend3/Ndufb11/Hspa8/Gale
GO:0009205	purine ribonucleoside triphosphate metabolic process	196	0.536997	1.73839	1.17986e-05	1.17986e-05	0.00200907	1880	tags=32%, list=13%, signal=28%	Aldoc/Pgk1/Pkm/Aldoa/Tpi1/Ampd3/Pfkl/Pgam1/Nupr1/Eno1/Gapdh/Myc/Nme1/Vcp/Pfkp/Ran/Ndufab1/Nme2/Ndufb8/Dnm1l/Ndufb9/Gpi1/Atp6v1a/Hif1a/Itpa/Ndufb10/Impdh1/Ndufb6/Ndufs5/Bcl2l1/Gnai3/Galk1/Ndufc1/Clpx/Atp7a/Ndufa8/Stoml2/Ndufs8/Nudt2/Eif6/Parg/Hdac4/Ndufs7/Ndufb7/Hk3/Ndufv2/Htr2a/Ola1/Ndufs6/Nudt5/Slc25a13/Ndufb2/Hk1/Ndufb5/App/Ndufs1/Tspo/Atp6v1b2/Bend3/Ndufb11/Hspa8/Gale
GO:0007017	microtubule-based process	711	0.388625	1.43421	1.27273e-05	1.27273e-05	0.00207254	3106	tags=30%, list=21%, signal=25%	Cdk5r1/Ccnf/Hsph1/Plk2/Atp2b4/Diaph3/Gadd45a/Gapdh/Spire1/Tuba1a/Sirt1/Lmna/Uhrf1/Fkbp4/Vcp/Tbcb/Nat10/Stmn1/Ranbp1/Kif2a/Tubb4b/Lyst/Ift20/Dst/Dynll2/Slk/Slain2/Dynll1/Spdl1/Myh9/Nup62/Cib1/Ttl/Ezr/Chmp2b/Arl8b/Fam110a/Kif5b/Arhgap21/Bicd2/Sfpq/Cep290/Fbxw11/Hif1a/Dctn3/Itgb1/Hsbp1/Diaph1/Ccnl1/Hook3/Phldb1/Ccnb2/Map7d1/Ssx2ip/Akap9/Mapre1/Birc5/Senp6/Rab21/Spg7/Azin1/Gas2l3/Flna/Cep350/Cfl1/Pdc…
GO:0001788	antibody-dependent cellular cytotoxicity	13	-0.946696	-1.83188	1.29827e-05	1.29827e-05	0.00207254	543	tags=85%, list=4%, signal=82%	Fcgr3/H2-K1/H2-D1/Fcgr2b/H2-T22/Fcgr1/H2-Q4/H2-Q6/H2-Q7/Fcgr4/H2-T23
GO:0002478	antigen processing and presentation of exogenous peptide antigen	36	-0.849581	-1.92142	1.4852e-05	1.4852e-05	0.0021983	876	tags=58%, list=6%, signal=55%	Ctss/Tap2/B2m/Fcgr3/H2-K1/H2-D1/Fcgr2b/Unc93b1/H2-M3/H2-T22/Fcgr1/H2-Q4/H2-Q6/H2-Q7/H2-T23/H2-DMa/Cd74/H2-Eb1/H2-DMb1/H2-Aa/H2-Ab1
GO:0044786	cell cycle DNA replication	38	0.773701	1.94173	1.50391e-05	1.50391e-05	0.0021983	1093	tags=29%, list=7%, signal=27%	Mcm5/Mcm2/Tk1/Mcm3/Mcm7/Pcna/Mcm4/Lig1/Mcm6/Cdt1/Pola1
GO:0019882	antigen processing and presentation	93	-0.731811	-1.87178	1.50615e-05	1.50615e-05	0.0021983	876	tags=32%, list=6%, signal=31%	Ctss/Tap2/Rab5b/Psmb8/B2m/Fcgr3/Psme1/Psmb9/H2-K1/H2-D1/Fcgr2b/Tap1/Unc93b1/Fgl2/H2-M3/H2-T22/Thbs1/Fcgr1/H2-Q4/H2-Q6/H2-Q7/Fcgr4/H2-T23/H2-DMa/Cd74/H2-Eb1/H2-DMb1/H2-Aa/Ighm/H2-Ab1
GO:0006081	cellular aldehyde metabolic process	61	0.709167	1.94226	1.58032e-05	1.58032e-05	0.00224248	1636	tags=33%, list=11%, signal=29%	Pgk1/Aldoa/Tpi1/Pgam1/Eno1/Gapdh/Wnt4/Grhpr/Esd/Park7/Rest/Adh5/Tkt/Aldh3b1/Dab2/Mdh2/Taldo1/Rpe/Glo1/Idh2
GO:0033260	nuclear DNA replication	33	0.797665	1.9417	1.63452e-05	1.63452e-05	0.0022567	1093	tags=33%, list=7%, signal=31%	Mcm5/Mcm2/Tk1/Mcm3/Mcm7/Pcna/Mcm4/Lig1/Mcm6/Cdt1/Pola1
GO:0001819	positive regulation of cytokine production	437	-0.541579	-1.63931	1.74708e-05	1.74708e-05	0.00234864	1181	tags=24%, list=8%, signal=23%	P2rx7/Lbp/Tbc1d23/H2-Q10/Laptm5/Cybb/Sulf1/Slc11a1/Ifi214/Spon2/Oas1a/Rad21/Cd40/Cd274/Syk/Ticam2/Hilpda/C3ar1/Il15/Sash3/Sod1/Cebpg/Mefv/Il6ra/Lgals9/Irf5/Casp8/Gsdmd/Grk2/Sptbn1/Eif2ak2/Cgas/Csf1r/Osm/Nfam1/Tlr7/Zbtb7b/Stat3/Cd14/Myd88/Zbtb20/Pde4b/B2m/Tnfrsf1a/Naip5/Cd300c2/Stat5b/Fcgr3/Il4ra/Ifngr1/Dennd1b/Tut4/Sorl1/Cebpb/Dhx58/Ddit3/Ly9/Rara/H2-K1/Pou2f2/Hpse/Tlr1/H2-D1/Fcgr2b/Ly96/Akap12/I…
GO:0048514	blood vessel morphogenesis	546	-0.513503	-1.57979	1.80292e-05	1.80292e-05	0.00236156	1291	tags=18%, list=9%, signal=17%	Glul/Cdh13/Sema5a/Mcam/Pknox1/Pparg/Cd40/Mmp19/Flcn/Nrp1/Syk/Ednra/Calcrl/Ccl11/C3ar1/Rin2/Ccm2/Cx3cr1/Pxn/Dab2ip/Tcf4/Rhoj/Cd47/Casp8/Tnfaip2/Tgfbr2/Hs6st1/Amot/Rasip1/Stk4/Prrx1/Sh2b3/Kat6a/Hhex/Ang/Eng/Stat3/Rhob/Acvrl1/Tnfrsf1a/Sox4/Adamts1/Ccl24/Ctsh/Btg1/Dcn/Klf2/Nfe2l2/Hspg2/Foxj2/Junb/Nr4a1/Hpse/Notch2/Pik3cd/Lrp5/Sema4a/Vegfa/Ramp1/Notch1/Jup/Vav2/Pml/Kdr/Mmp2/Col18a1/Smoc2/Hes1/Thbs1/Rn…
GO:0072521	purine-containing compound metabolic process	428	0.445126	1.56565	2.16244e-05	2.16244e-05	0.00274346	1731	tags=24%, list=12%, signal=22%	Aldoc/Pgk1/Pkm/Aldoa/Tpi1/Ampd3/Pfkl/Pgam1/Pdk1/Ldha/Nupr1/Eno1/Gapdh/Mvd/Txnrd1/Myc/Hmgcs1/Nme1/Vcp/Pfkp/Ran/Ndufab1/Pgd/Aprt/Pmvk/Nme2/Acsl1/Ndufb8/Dnm1l/Ndufb9/Fdx1/Gpi1/Atp6v1a/Hif1a/Itpa/Ndufb10/Kcnab2/Impdh1/Ndufb6/Mthfd2l/Ndufs5/Bcl2l1/Noct/Gmpr/Gnai3/Spp1/Galk1/Pank3/Ndufc1/Mpc1/Clpx/Icmt/Hsd17b4/Atp7a/Dnph1/Ndufa8/Tkt/Stoml2/Pcmt1/Pgls/Ndufs8/Nudt2/Eif6/Pdk3/Nudt3/Oga/Parg/Mthfd1/Acot7/H…
GO:0001944	vasculature development	664	-0.486747	-1.51051	2.20189e-05	2.20189e-05	0.00274346	1414	tags=18%, list=10%, signal=17%	Zfp36l1/Sgcb/Pde2a/Foxo4/Cybb/Pank2/Sulf1/Tie1/Vezf1/Glul/Cdh13/Nfatc1/Sema5a/Mcam/Pknox1/Ncoa6/Pparg/Cd40/Mmp19/Flcn/Nrp1/Syk/Ednra/Calcrl/Ccl11/C3ar1/Rin2/Ccm2/Cx3cr1/Il6ra/Pxn/Dab2ip/Lama4/Tcf4/Rhoj/Cd47/Casp8/Tnfaip2/Tgfbr2/Hs6st1/Amot/Abcc9/Arid1a/Rasip1/Stk4/Prrx1/Sh2b3/Kat6a/Hhex/Ang/Pdcd4/Eng/Mef2c/Stat3/Rhob/Acvrl1/Tnfrsf1a/Ndst1/Sox4/Adamts1/Ccl24/Ctsh/Btg1/Dcn/Klf2/Nfe2l2/Hspg2/Foxj2/D…
GO:0006091	generation of precursor metabolites and energy	373	0.451841	1.5579	2.28637e-05	2.28637e-05	0.00278089	1667	tags=25%, list=11%, signal=23%	Aldoc/Pgk1/Bnip3/Pkm/Aldoa/Tpi1/Tnf/Plec/Pfkl/Pgam1/Ldha/Nupr1/Eno1/Gapdh/Myc/Pgm1/Vcp/Chchd4/Prelid1/Pfkp/Ndufab1/Pgd/Ugp2/Park7/Gys1/Adh5/Sod2/Cox5a/Ndufb8/Coq7/Pygm/Per2/Ndufb9/Fdx2/Rbpj/Fdx1/Gpi1/Hif1a/Gadd45gip1/Ndufb10/Ndufb6/Stk40/Ndufs5/Uqcc2/Galk1/Por/Ndufc1/Mtln/Gbe1/Bax/Atp7a/Ndufa8/Tkt/Stoml2/Fxn/Shmt2/Pgls/Ndufs8/Eif6/Etfb/Cox4i1/Uqcrq/Chchd2/Hdac4/Ptges3/Pik3ca/Ndufs7/Ndufb7/Hk3/Aca…
GO:0009144	purine nucleoside triphosphate metabolic process	205	0.512404	1.66911	2.73289e-05	2.73289e-05	0.00324669	1880	tags=31%, list=13%, signal=28%	Aldoc/Pgk1/Pkm/Aldoa/Tpi1/Ampd3/Pfkl/Pgam1/Nupr1/Eno1/Gapdh/Myc/Nme1/Vcp/Pfkp/Ran/Ndufab1/Nme2/Ndufb8/Dnm1l/Ndufb9/Gpi1/Atp6v1a/Hif1a/Itpa/Ndufb10/Impdh1/Ndufb6/Ndufs5/Bcl2l1/Gnai3/Galk1/Ndufc1/Clpx/Atp7a/Ndufa8/Stoml2/Ndufs8/Nudt2/Eif6/Oga/Parg/Hdac4/Ndufs7/Ndufb7/Hk3/Ndufv2/Htr2a/Ola1/Ndufs6/Nudt5/Slc25a13/Ndufb2/Hk1/Ndufb5/App/Ndufs1/Tspo/Atp6v1b2/Bend3/Ndufb11/Ak2/Hspa8/Gale
GO:0002831	regulation of response to biotic stimulus	463	-0.522882	-1.58869	2.8843e-05	2.8843e-05	0.00334869	1404	tags=22%, list=10%, signal=20%	H2-Q10/Cd37/Gramd4/Itch/Clec2d/Tifa/Trim41/Ifi214/Oas1a/Rab11fip2/Sec14l1/Pparg/Matr3/Cd274/Syk/Ticam2/Pum2/Il15/Nr1d1/Dtx4/Mefv/Trim11/Nmi/Dab2ip/Gbp7/Pcbp2/Lgals9/Casp8/Ifi35/Tap2/Casp6/Eif2ak2/Cgas/Trim25/Tlr7/Cd14/Myd88/Adar/Trib1/Znfx1/Trim12a/Stat5b/Irak2/Irf2/Gbp3/Nfe2l2/Tut4/Trim12c/Dhx58/Parp14/Trafd1/Igtp/H2-K1/Tlr1/Irgm2/H2-D1/Serping1/Ly96/Tap1/Ifi204/Samhd1/Unc93b1/Dtx3l/Trim30a/Fgl2…
GO:0009141	nucleoside triphosphate metabolic process	216	0.51698	1.68729	2.99598e-05	2.99598e-05	0.00340105	1880	tags=31%, list=13%, signal=28%	Aldoc/Pgk1/Pkm/Aldoa/Tpi1/Ampd3/Pfkl/Pgam1/Nupr1/Eno1/Gapdh/Myc/Nme1/Vcp/Pfkp/Ran/Ndufab1/Nme2/Dtymk/Ndufb8/Dnm1l/Ndufb9/Dut/Gpi1/Atp6v1a/Hif1a/Itpa/Ndufb10/Impdh1/Ndufb6/Ndufs5/Bcl2l1/Gnai3/Galk1/Ndufc1/Clpx/Atp7a/Ndufa8/Stoml2/Ndufs8/Nudt2/Eif6/Uck2/Oga/Parg/Hdac4/Ndufs7/Ndufb7/Hk3/Ndufv2/Htr2a/Ola1/Ndufs6/Nudt5/Slc25a13/Ndufb2/Hk1/Ndufb5/App/Tbpl1/Ndufs1/Tspo/Atp6v1b2/Bend3/Ndufb11/Ak2/Hspa8/G…
GO:0001568	blood vessel development	632	-0.494505	-1.53165	3.08674e-05	3.08674e-05	0.0034279	1274	tags=17%, list=9%, signal=17%	Cdh13/Sema5a/Mcam/Pknox1/Ncoa6/Pparg/Cd40/Mmp19/Flcn/Nrp1/Syk/Ednra/Calcrl/Ccl11/C3ar1/Rin2/Ccm2/Cx3cr1/Il6ra/Pxn/Dab2ip/Lama4/Tcf4/Rhoj/Cd47/Casp8/Tnfaip2/Tgfbr2/Hs6st1/Amot/Abcc9/Arid1a/Rasip1/Stk4/Prrx1/Sh2b3/Kat6a/Hhex/Ang/Eng/Mef2c/Stat3/Rhob/Acvrl1/Tnfrsf1a/Ndst1/Sox4/Adamts1/Ccl24/Ctsh/Btg1/Dcn/Klf2/Nfe2l2/Hspg2/Foxj2/Ddit3/Junb/Antxr1/Nr4a1/Hpse/Notch2/Pik3cd/Lrp5/Sema4a/Vegfa/Ramp1/Lyl1/…
GO:0098609	cell-cell adhesion	657	-0.486682	-1.51088	3.29195e-05	3.29195e-05	0.00354842	1414	tags=18%, list=10%, signal=17%	Zfp36l1/H2-Q10/Cd37/Laptm5/Itch/Mad1l1/Smarcc2/Bmi1/Gcnt1/Cdh13/Sema4d/Mcam/Epha3/Akna/Zbtb1/Cd93/Cd274/Syk/Tspan9/Il15/Scarf1/Sash3/Cx3cr1/P2ry12/Itga4/Il6ra/Casp3/Pard3/Serpine2/Lgals9/Cd47/Vmp1/Nectin4/Gstp1/Tgfbr2/Arid1a/Gcnt2/Sh2b3/Egfr/Sirpb1a/Taok2/Tnfrsf21/Tnfaip8l2/Zbtb7b/Nfkbid/B2m/C1qtnf1/Lamb1/Stat5b/Dusp22/Sox4/Rac2/Il4ra/Bcl6/F11r/Hlx/Selplg/Il6st/Stk10/St3gal4/Cebpb/Rara/H2-K1/Lrp5…
GO:0042254	ribosome biogenesis	304	0.467889	1.59447	3.49363e-05	3.49363e-05	0.00354842	3129	tags=41%, list=21%, signal=33%	Rrs1/Utp18/Nop56/Nat10/Nhp2/Rps19bp1/Ran/Ebna1bp2/Nol8/Pop5/Mrpl20/Dhx29/Nop16/Bop1/Tma16/Abce1/Usp16/C1qbp/Mrto4/Mphosph10/Gtf2h5/Riok3/Ncl/Ddx54/Lyar/Nol7/Riox2/Pop7/Bysl/Imp4/Utp11/Wdr12/Utp6/Utp15/Ddx21/Eif6/Sde2/Wdr43/Rps7/Rrp7a/Ftsj3/Mettl16/Grwd1/Mybbp1a/Rrp1/Brix1/Rps5/Ddx31/Dcaf13/Rplp0/Pak1ip1/Pa2g4/Nol11/Npm1/Ipo4/Rps27l/Tsr1/Nop14/Rrp12/Chd7/Rbm10/Lsm6/Mrps7/Nom1/Mak16/Gtpbp4/Rpl14/Rp…
GO:0019677	NAD catabolic process	20	0.853808	1.90016	3.50968e-05	3.50968e-05	0.00354842	630	tags=45%, list=4%, signal=43%	Pgk1/Pkm/Aldoa/Tpi1/Pfkl/Eno1/Gapdh/Pfkp/Gpi1
GO:0070050	neuron cellular homeostasis	55	0.721381	1.94053	3.55909e-05	3.55909e-05	0.00354842	1904	tags=36%, list=13%, signal=32%	Ifnb1/Marcksl1/Atp6v1h/Erc1/Immt/Chmp2b/Atp6v1a/Atp6v0a1/Atp2a2/Atp7a/Atp6v1c1/Atp6v1f/Atp6v1e1/Atp6v1g1/Atp6ap2/Atp6v1d/Npy/App/Atp6v1b2/P2ry2
GO:0140970	AIM2 inflammasome complex assembly	16	-0.921434	-1.82264	3.58714e-05	3.58714e-05	0.00354842	341	tags=62%, list=2%, signal=61%	Ifi214/Trim11/Ifi204/Gbp2/Ifi203/Mndal/Ifi211/Ifi209/Ifi206/Ifi213
GO:0010469	regulation of signaling receptor activity	71	0.67227	1.89371	3.61369e-05	3.61369e-05	0.00354842	975	tags=24%, list=7%, signal=22%	Cdk5r1/Arc/Edn1/Tnf/Plau/Serpine1/Shisa9/Adam17/Adrb2/Park7/Dapk1/Ppp2r5b/Hif1a/Lilrb4a/Il10/Rwdd1/Homer3
GO:0140053	mitochondrial gene expression	163	0.557287	1.76068	3.68149e-05	3.68149e-05	0.00354842	3519	tags=53%, list=24%, signal=41%	Mrpl41/Mrps6/Mrps28/Mrpl20/Mrpl54/Mrpl12/Lrpprc/Mrpl51/Mrps12/Mrpl14/Mrps10/Gadd45gip1/Mrps14/C1qbp/Mrpl34/Uqcc2/Mrpl57/Mrpl43/Aurkaip1/Mrps15/Dap3/Coa3/Mrpl18/Mrps26/Mrps34/Mrpl28/Shmt2/Mrps25/Elac2/Mrpl13/Mrpl22/Mrpl49/Chchd1/Mrps24/Mrps17/Chchd10/Mrpl21/Mrpl40/Mrpl38/Mrps18b/Mrpl33/Mrpl17/Fastk/Mrpl36/Rcc1l/Mrps7/Mrpl53/Mrps18a/Mrpl46/Mrpl55/Mrpl19/Yars2/Mrps30/Mrpl42/Mrpl39/Mrps33/Mrpl35/Mrps…
GO:0046649	lymphocyte activation	693	-0.484708	-1.50751	4.40095e-05	4.40095e-05	0.00409809	1414	tags=20%, list=10%, signal=19%	Zfp36l1/H2-Q10/Cd37/Laptm5/Itch/Slc11a1/Sp3/Mad1l1/Smarcc2/Bmi1/Kdelr1/Itm2a/Nfatc1/Kmt2a/Mfng/Pknox1/Cd40/Zbtb1/Cd274/Syk/Ticam2/Fzd7/Flt3l/Il15/Sash3/Kmt5c/Cebpg/Il6ra/Casp3/Lgals9/Cd47/Tgfbr2/Zfp36l2/Arid1a/Sh2b3/Bank1/Sirpb1a/Samsn1/Tnfrsf21/Tnfaip8l2/Ikzf1/Ifnar2/Hhex/Cgas/Csf1r/Fbxo7/Elf4/Wwp1/Ep300/Mef2c/Nfam1/Zbtb7b/Stat3/Myd88/Nfkbid/B2m/Igbp1/Nedd9/Cd79b/Stat5b/Dusp22/Sox4/Rac2/Il4ra/Bc…
GO:0050865	regulation of cell activation	542	-0.505503	-1.55104	4.42355e-05	4.42355e-05	0.00409809	1214	tags=19%, list=8%, signal=18%	Pparg/Cd40/Zbtb1/Cd274/Syk/Ticam2/Flt3l/Il15/Sash3/Nr1d1/Kmt5c/Il6ra/Casp3/Ddr2/Serpine2/Lgals9/Cebpa/Cd47/Tgfbr2/Jund/Zfp36l2/Arid1a/Sh2b3/Bank1/Sirpb1a/Samsn1/Tnfrsf21/Tnfaip8l2/Cgas/Csf1r/Fbxo7/Mef2c/Nfam1/Zbtb7b/Myd88/Nfkbid/B2m/C1qtnf1/Nedd9/Stat5b/Dusp22/Sox4/Rac2/Il4ra/Bcl6/F11r/Cdkn1a/Hlx/Csk/Il6st/Cebpb/Rara/H2-K1/H2-D1/Slamf7/Fcgr2b/Pla2g2d/Mertk/Icosl/Cd300lb/Fgl2/Cd83/Lst1/H2-T22/Zeb1…
GO:0140971	regulation of AIM2 inflammasome complex assembly	14	-0.927917	-1.81774	4.49245e-05	4.49245e-05	0.00409809	341	tags=71%, list=2%, signal=70%	Ifi214/Trim11/Ifi204/Gbp2/Ifi203/Mndal/Ifi211/Ifi209/Ifi206/Ifi213
GO:0008299	isoprenoid biosynthetic process	25	0.831507	1.93781	4.72311e-05	4.72311e-05	0.00423292	616	tags=32%, list=4%, signal=31%	Fdps/Idi1/Dhrs9/Mvd/Hmgcs1/Pmvk/Nus1/Fdft1
GO:0009260	ribonucleotide biosynthetic process	158	0.544174	1.72499	6.38263e-05	6.38263e-05	0.00552949	3174	tags=44%, list=22%, signal=35%	Aldoa/Ampd3/Pdk1/Eno1/Myc/Nme1/Vcp/Ndufab1/Aprt/Nme2/Acsl1/Ndufb8/Ndufb9/Ndufb10/Impdh1/Ndufb6/Ndufs5/Bcl2l1/Gmpr/Pank3/Ndufc1/Mpc1/Ndufa8/Stoml2/Ndufs8/Nudt2/Uck2/Pdk3/Mthfd1/Acot7/Ndufs7/Papss1/Ndufb7/Ndufv2/Mpc2/Ndufs6/Slc25a13/Ndufb2/Ndufb5/Vdac1/Adcy3/Ndufs1/Ndufb11/Ak2/Umps/Cmpk1/Ndufs4/Coasy/Parp1/Nme6/Ndufc2/Sdhc/Dld/Guk1/Pdha1/Adsl/Acly/Gmps/Ndufv3/Ndufa11/Eno1b/Acsl5/Ndufa9/Cad/Ndufa10/…
GO:0141086	negative regulation of inflammasome-mediated signaling pathway	26	-0.866725	-1.86615	6.40241e-05	6.40241e-05	0.00552949	412	tags=50%, list=3%, signal=49%	Mefv/Trim11/Igtp/Irgm2/Ifi204/Trim30a/Ifi203/Mndal/Irgm1/Ifi211/Ifi209/Ifi206/Ifi213
GO:0002694	regulation of leukocyte activation	499	-0.502696	-1.53829	6.51997e-05	6.51997e-05	0.00552949	1214	tags=19%, list=8%, signal=18%	Pparg/Cd40/Zbtb1/Cd274/Syk/Ticam2/Flt3l/Il15/Sash3/Nr1d1/Kmt5c/Casp3/Lgals9/Cebpa/Cd47/Tgfbr2/Jund/Zfp36l2/Arid1a/Sh2b3/Bank1/Sirpb1a/Samsn1/Tnfrsf21/Tnfaip8l2/Cgas/Csf1r/Fbxo7/Mef2c/Nfam1/Zbtb7b/Myd88/Nfkbid/B2m/Nedd9/Stat5b/Dusp22/Sox4/Rac2/Il4ra/Bcl6/Cdkn1a/Hlx/Csk/Il6st/Cebpb/Rara/H2-K1/H2-D1/Slamf7/Fcgr2b/Pla2g2d/Mertk/Icosl/Cd300lb/Fgl2/Cd83/Lst1/H2-T22/Zeb1/Hes1/Rhoh/Thbs1/Irf1/Gm5150/Cd22…
GO:0019320	hexose catabolic process	33	0.779394	1.89723	6.6028e-05	6.6028e-05	0.00552949	803	tags=33%, list=5%, signal=32%	Pgk1/Pkm/Aldoa/Tpi1/Pfkl/Ldha/Eno1/Gapdh/Pfkp/Gpi1/Galk1
GO:0090407	organophosphate biosynthetic process	444	0.418812	1.48151	6.78328e-05	6.78328e-05	0.005589	1847	tags=21%, list=13%, signal=19%	Fdps/Idi1/Pgk1/Aldoa/Tpi1/Ampd3/Pgam1/Pdk1/Eno1/Gapdh/Mvd/Sgms2/Tk1/Myc/Hmgcs1/Nme1/Vcp/Ndufab1/Capn2/Pdgfa/Slc27a1/Agpat5/Plaat3/Aprt/Pik3r1/Pmvk/Nme2/Dtymk/Nus1/Fabp5/Myh9/Acsl1/Ndufb8/Ndufb9/Dut/Htr2b/Ptpmt1/Ndufb10/Impdh1/Ndufb6/Mthfd2l/Ndufs5/Bcl2l1/Gmpr/Rrm1/Pank3/Ndufc1/Mpc1/Chka/Ndufa8/Vapa/Tkt/Stoml2/Impa1/Ndufs8/Nudt2/Uck2/Pdgfb/Pdk3/Dgkh/Ckb/Mthfd1/Acot7/Pik3ca/Ndufs7/Papss1/Ndufb7/Ndu…
GO:0002757	immune response-activating signaling pathway	394	-0.532627	-1.59934	6.90372e-05	6.90372e-05	0.00559796	1404	tags=22%, list=10%, signal=20%	H2-Q10/Laptm5/Gramd4/Itch/Tifa/Ifi214/Oas1a/Rab11fip2/Lcp2/Sec14l1/Cd274/Syk/Ticam2/Pum2/C3ar1/Nr1d1/Mefv/Trim11/Nmi/Dab2ip/Pcbp2/Lpxn/Cd47/Klhl6/Ifi35/Tnfrsf21/Eif2ak2/Cgas/C5ar2/Trim25/Mef2c/Nfam1/Tlr7/Cd14/Myd88/Pde4b/Nfkbid/Cd79b/Dusp22/Irak2/Irf2/Dennd1b/Csk/Cmklr1/Usp12/Dhx58/Igtp/H2-K1/Tlr1/Irgm2/H2-D1/Ly96/Ifi204/Fosl2/Icosl/Unc93b1/Trim30a/Gbp2/Irf1/Cd22/Cd300a/Card11/Ifi203/H2-Q4/H2-Q6/…
GO:0006007	glucose catabolic process	24	0.834391	1.92864	7.29231e-05	7.29231e-05	0.00582066	630	tags=42%, list=4%, signal=40%	Pgk1/Pkm/Aldoa/Tpi1/Pfkl/Ldha/Eno1/Gapdh/Pfkp/Gpi1
GO:0050670	regulation of lymphocyte proliferation	221	-0.590507	-1.67886	7.4984e-05	7.4984e-05	0.00589307	1438	tags=24%, list=10%, signal=22%	Tnfrsf1b/H2-Q10/Cd37/Laptm5/Itch/Mad1l1/Bmi1/Cd40/Cd274/Syk/Flt3l/Il15/Sash3/Casp3/Lgals9/Tgfbr2/Tnfrsf21/Csf1r/Mef2c/Zbtb7b/Myd88/Stat5b/Rac2/Bcl6/Cdkn1a/Il6st/Cebpb/H2-K1/H2-D1/Fcgr2b/Pla2g2d/Icosl/Lst1/H2-T22/Hes1/Irf1/Cd22/Cd300a/Card11/H2-Q4/H2-Q6/Cd28/Ccr2/H2-Q7/Irgm1/H2-T23/Cd74/H2-DMb1/H2-Aa/Ighm/Slfn1/Cd38/Clec2i/Igf2
GO:0099003	vesicle-mediated transport in synapse	194	0.517268	1.67319	7.71298e-05	7.71298e-05	0.00596987	1977	tags=22%, list=13%, signal=19%	Cdk5r1/Arc/Stx11/Rala/Stx3/Cd24a/Stxbp5/Ap2s1/Atp6v1h/Gripap1/Erc1/Dnm1l/Bin1/Canx/Actg1/Atp6v1a/Vps35/Arhgdia/Stx4a/Bcl2l1/Diaph1/Atp6v0a1/Atp2a2/Syt11/Cyfip1/Atp6v1c1/Dnm2/Atp6v1f/Sacm1l/Atp6v1e1/Atp6v1g1/Scrib/Atp6ap2/Atp6v1d/Rab11a/Ap2m1/Npy/Atp6v1b2/Fbxo45/P2ry2/Mff/Rock1
GO:0002683	negative regulation of immune system process	453	-0.520662	-1.57738	7.84538e-05	7.84538e-05	0.00598172	1404	tags=22%, list=10%, signal=20%	H2-Q10/Cd37/Laptm5/Gramd4/Itch/Clec2d/Mad1l1/Ifi214/Oas1a/Sec14l1/Pparg/Cd274/Ticam2/Tmem176a/Nr1d1/C1qc/Cx3cr1/Dtx4/Mefv/Trim11/Nmi/Casp3/Tapbpl/Dab2ip/Pcbp2/Lgals9/Lpxn/Cebpa/Tob2/Tap2/Bank1/Samsn1/Tnfrsf21/Tnfaip8l2/Cgas/Fbxo7/C5ar2/Zbtb7b/Nfkbid/Adar/Trib1/Dusp22/Tmem176b/Il4ra/Bcl6/Tsc22d3/Hlx/Cebpb/Rin3/Dhx58/Parp14/Trafd1/Igtp/Rara/H2-K1/Irgm2/H2-D1/Fcgr2b/Serping1/Bst2/Pla2g2d/Tap1/Mertk/…
GO:0051249	regulation of lymphocyte activation	440	-0.517984	-1.56752	8.13291e-05	8.13291e-05	0.00607564	1210	tags=19%, list=8%, signal=18%	Cd40/Zbtb1/Cd274/Syk/Ticam2/Flt3l/Il15/Sash3/Kmt5c/Casp3/Lgals9/Cd47/Tgfbr2/Zfp36l2/Arid1a/Sh2b3/Bank1/Sirpb1a/Samsn1/Tnfrsf21/Tnfaip8l2/Cgas/Csf1r/Fbxo7/Mef2c/Nfam1/Zbtb7b/Myd88/Nfkbid/B2m/Nedd9/Stat5b/Dusp22/Sox4/Rac2/Il4ra/Bcl6/Cdkn1a/Hlx/Csk/Il6st/Cebpb/Rara/H2-K1/H2-D1/Slamf7/Fcgr2b/Pla2g2d/Mertk/Icosl/Fgl2/Cd83/Lst1/H2-T22/Zeb1/Hes1/Rhoh/Irf1/Gm5150/Cd22/Cd300a/Card11/Sirpb1c/H2-Q4/H2-Q6/Cd…
GO:0046184	aldehyde biosynthetic process	24	0.831651	1.92231	8.30687e-05	8.30687e-05	0.00607564	409	tags=33%, list=3%, signal=32%	Pgk1/Aldoa/Tpi1/Pgam1/Eno1/Gapdh/Wnt4/Rest
GO:0046034	ATP metabolic process	175	0.531643	1.69526	8.32536e-05	8.32536e-05	0.00607564	1880	tags=32%, list=13%, signal=28%	Aldoc/Pgk1/Pkm/Aldoa/Tpi1/Ampd3/Pfkl/Pgam1/Nupr1/Eno1/Gapdh/Myc/Vcp/Pfkp/Ndufab1/Ndufb8/Dnm1l/Ndufb9/Gpi1/Atp6v1a/Hif1a/Ndufb10/Ndufb6/Ndufs5/Bcl2l1/Galk1/Ndufc1/Clpx/Atp7a/Ndufa8/Stoml2/Ndufs8/Nudt2/Eif6/Parg/Hdac4/Ndufs7/Ndufb7/Hk3/Ndufv2/Htr2a/Ola1/Ndufs6/Nudt5/Slc25a13/Ndufb2/Hk1/Ndufb5/App/Ndufs1/Tspo/Atp6v1b2/Bend3/Ndufb11/Hspa8/Gale
GO:0031348	negative regulation of defense response	219	-0.591856	-1.68263	8.4503e-05	8.4503e-05	0.00607996	1438	tags=26%, list=10%, signal=24%	Tnfrsf1b/H2-Q10/Itch/Clec2d/Ifi214/Oas1a/Sharpin/Ash1l/Pparg/Nr1d1/Sod1/Cx3cr1/Dtx4/Mefv/Nmi/Pcbp2/Lgals9/Gstp1/Il10ra/Tap2/Tnfaip8l2/Elf4/Stat3/Adar/Tnfrsf1a/Dhx58/Parp14/Trafd1/Igtp/H2-K1/Irgm2/H2-D1/Fcgr2b/Serping1/Zfp36/Tap1/Ifi204/Samhd1/Fgl2/H2-T22/Nlrc5/Ifi203/H2-Q4/H2-Q6/Stat2/H2-Q7/Mndal/Irgm1/Ifi211/H2-T23/Apoe/Ifi209/Oas1g/Oas3/Igf2/Ifi206/Ifi213/Cdh5
GO:0046390	ribose phosphate biosynthetic process	164	0.532895	1.68221	8.84527e-05	8.84527e-05	0.00627575	3174	tags=43%, list=22%, signal=34%	Aldoa/Ampd3/Pdk1/Eno1/Myc/Nme1/Vcp/Ndufab1/Aprt/Nme2/Acsl1/Ndufb8/Ndufb9/Ndufb10/Impdh1/Ndufb6/Ndufs5/Bcl2l1/Gmpr/Pank3/Ndufc1/Mpc1/Ndufa8/Stoml2/Ndufs8/Nudt2/Uck2/Pdk3/Mthfd1/Acot7/Ndufs7/Papss1/Ndufb7/Ndufv2/Mpc2/Ndufs6/Slc25a13/Ndufb2/Ndufb5/Vdac1/Adcy3/Ndufs1/Ndufb11/Ak2/Umps/Cmpk1/Ndufs4/Coasy/Parp1/Nme6/Ndufc2/Sdhc/Dld/Guk1/Pdha1/Adsl/Acly/Gmps/Ndufv3/Ndufa11/Eno1b/Acsl5/Ndufa9/Cad/Ndufa10/…
GO:0006457	protein folding	151	0.547317	1.72559	9.51779e-05	9.51779e-05	0.00664126	1482	tags=34%, list=10%, signal=31%	Ptges3l/Hsph1/Hspa5/Hsp90b1/Fkbp2/Fkbp4/Tbcb/Chchd4/Pdia4/Sdf2l1/Hspa9/Hsp90aa1/Hspd1/Cct3/Pdcd5/Sgta/Unc45a/Calr/Cct6a/Hspa2/Dnajb4/Hsp90ab1/Bag1/Canx/Hspa4/Dnajc3/Ppia/Dnajb11/Cct2/Pfdn6/Pdia3/Tcp1/Ahsa2/Clpx/Nudcd2/Prdx4/Dnlz/Pfdn4/Tbcd/Ptges3/Dnaja2/Pdcl3/Cct8/Grpel1/Stub1/Pfdn2/Cct7/Ppil1/Selenof/P4hb/Hspa4l
GO:0061620	glycolytic process through glucose-6-phosphate	20	0.840166	1.8698	9.67582e-05	9.67582e-05	0.00664126	803	tags=50%, list=5%, signal=47%	Pgk1/Pkm/Aldoa/Tpi1/Pfkl/Eno1/Gapdh/Pfkp/Gpi1/Galk1
GO:0002764	immune response-regulating signaling pathway	402	-0.525634	-1.57911	9.85157e-05	9.85157e-05	0.00664126	1404	tags=22%, list=10%, signal=20%	H2-Q10/Laptm5/Gramd4/Itch/Tifa/Ifi214/Oas1a/Rab11fip2/Lcp2/Sec14l1/Cd40/Cd274/Syk/Ticam2/Pum2/C3ar1/Nr1d1/Mefv/Trim11/Nmi/Dab2ip/Pcbp2/Lpxn/Cd47/Klhl6/Ifi35/Tnfrsf21/Eif2ak2/Cgas/C5ar2/Trim25/Mef2c/Nfam1/Tlr7/Cd14/Myd88/Pde4b/Nfkbid/Cd79b/Dusp22/Irak2/Ctsh/Irf2/Dennd1b/Csk/Cmklr1/Usp12/Dhx58/Igtp/H2-K1/Tlr1/Irgm2/H2-D1/Ly96/Ifi204/Fosl2/Icosl/Unc93b1/Trim30a/Gbp2/Irf1/Cd22/Cd300a/Card11/Ifi203/H2…
GO:0032944	regulation of mononuclear cell proliferation	225	-0.581931	-1.66004	9.88046e-05	9.88046e-05	0.00664126	1438	tags=24%, list=10%, signal=22%	Tnfrsf1b/H2-Q10/Cd37/Laptm5/Itch/Mad1l1/Bmi1/Cd40/Cd274/Syk/Flt3l/Il15/Sash3/Casp3/Lgals9/Tgfbr2/Tnfrsf21/Csf1r/Mef2c/Zbtb7b/Myd88/Stat5b/Rac2/Bcl6/Cdkn1a/Il6st/Cebpb/H2-K1/H2-D1/Fcgr2b/Pla2g2d/Icosl/Lst1/H2-T22/Hes1/Irf1/Cd22/Cd300a/Card11/H2-Q4/H2-Q6/Cd28/Ccr2/H2-Q7/Irgm1/H2-T23/Cd74/H2-DMb1/H2-Aa/Ighm/Slfn1/Cd38/Clec2i/Igf2
GO:0006735	NADH regeneration	17	0.864349	1.86553	0.000103303	0.000103303	0.00667992	630	tags=53%, list=4%, signal=51%	Pgk1/Pkm/Aldoa/Tpi1/Pfkl/Eno1/Gapdh/Pfkp/Gpi1
GO:0061621	canonical glycolysis	17	0.864349	1.86553	0.000103303	0.000103303	0.00667992	630	tags=53%, list=4%, signal=51%	Pgk1/Pkm/Aldoa/Tpi1/Pfkl/Eno1/Gapdh/Pfkp/Gpi1
GO:0061718	glucose catabolic process to pyruvate	17	0.864349	1.86553	0.000103303	0.000103303	0.00667992	630	tags=53%, list=4%, signal=51%	Pgk1/Pkm/Aldoa/Tpi1/Pfkl/Eno1/Gapdh/Pfkp/Gpi1
GO:0008284	positive regulation of cell population proliferation	786	-0.467136	-1.45561	0.000105316	0.000105316	0.00672501	1187	tags=15%, list=8%, signal=15%	Smpd3/Rarg/Cd274/Syk/Ednra/Fzd7/Hilpda/Calcrl/Ccl11/Kdm5b/Flt3l/C3ar1/Il15/Sash3/Cx3cr1/Itga4/Fermt2/Il6ra/Ddr2/Slc35f6/AY036118/Cd47/Bicral/Grk2/Tgfbr2/Cnot6l/Tgif1/Rasip1/Prrx1/Gcnt2/Hck/Mdm4/Egfr/Pim1/Ccnd2/Ang/Csf1r/Cst3/P2ry6/Osm/Mef2c/Insr/Ccpg1/Rogdi/Stat3/Myd88/Chp2/Acvrl1/Stat5b/Sox4/Rac2/Bcl6/Adamts1/Ccl24/Cdkn1a/Ctsh/Cdkn1b/Hlx/Hspg2/Il6st/Snhg15/Foxj2/Pbx1/Bambi/Rara/Nr4a1/H2-K1/Hpse/…
GO:0032736	positive regulation of interleukin-13 production	23	-0.862621	-1.815	0.000109378	0.000109378	0.00689385	411	tags=39%, list=3%, signal=38%	Rara/H2-K1/H2-D1/H2-T22/H2-Q4/H2-Q6/H2-Q7/H2-T23/Tslp
GO:0009615	response to virus	299	-0.5562	-1.63918	0.000111359	0.000111359	0.00689385	1344	tags=27%, list=9%, signal=25%	Pde12/Cd37/Itch/Mov10/Trim41/Ifi214/Spon2/Oas1a/Cd40/Senp7/Ticam2/Aup1/Il15/Trim11/Nmi/Isg20/Trim34a/Trim8/Gbp7/Pcbp2/Lgals9/Irf5/Abcc9/Eif2ak2/Ifnar2/Cgas/Il10rb/Trim25/Map3k14/Tlr7/Myd88/Adar/Znfx1/Trim12a/Irf2/Ifngr1/Trim12c/Dhx58/Apobec1/Rnasel/Igtp/Pou2f2/Irgm2/Bst2/Slfn8/Ifi204/Samhd1/Unc93b1/Serinc3/Dtx3l/Trim30a/Fgl2/Pml/Sertad3/Bcl3/Ifit3b/Oas2/Parp9/Irf1/Stat1/Trim30d/Ifi203/Oasl2/Ifit3…
GO:0048002	antigen processing and presentation of peptide antigen	53	-0.780288	-1.85982	0.000112009	0.000112009	0.00689385	876	tags=45%, list=6%, signal=43%	H2-T24/Tapbpl/Ctss/Tap2/B2m/Fcgr3/H2-K1/H2-D1/Fcgr2b/Tap1/Unc93b1/H2-M3/H2-T22/Fcgr1/H2-Q4/H2-Q6/H2-Q7/H2-T23/H2-DMa/Cd74/H2-Eb1/H2-DMb1/H2-Aa/H2-Ab1
GO:0046365	monosaccharide catabolic process	35	0.762081	1.86888	0.000115832	0.000115832	0.00699725	803	tags=31%, list=5%, signal=30%	Pgk1/Pkm/Aldoa/Tpi1/Pfkl/Ldha/Eno1/Gapdh/Pfkp/Gpi1/Galk1
GO:0032633	interleukin-4 production	38	-0.815222	-1.8542	0.000116846	0.000116846	0.00699725	447	tags=42%, list=3%, signal=41%	Cebpb/Ddit3/Rara/H2-K1/Notch2/H2-D1/Notch1/Fosl2/Icosl/Cd83/H2-T22/H2-Q4/H2-Q6/Cd28/H2-Q7/H2-T23
GO:0045089	positive regulation of innate immune response	333	-0.550212	-1.63481	0.000117798	0.000117798	0.00699725	1404	tags=23%, list=10%, signal=21%	H2-Q10/Gramd4/Itch/Tifa/Trim41/Ifi214/Oas1a/Rab11fip2/Sec14l1/Matr3/Cd274/Syk/Ticam2/Pum2/Nr1d1/Mefv/Trim11/Nmi/Dab2ip/Gbp7/Pcbp2/Lgals9/Ifi35/Casp6/Eif2ak2/Cgas/Trim25/Tlr7/Cd14/Myd88/Znfx1/Trim12a/Stat5b/Irak2/Irf2/Gbp3/Trim12c/Dhx58/Igtp/H2-K1/Tlr1/Irgm2/H2-D1/Ly96/Ifi204/Unc93b1/Trim30a/Gbp2/H2-M3/H2-T22/Parp9/Irf1/Nlrc5/Cd300a/Trim30d/Ifi203/H2-Q4/H2-Q6/Ddx60/Tifab/H2-Q7/Mndal/Irgm1/Tlr12/If…
GO:0140972	negative regulation of AIM2 inflammasome complex assembly	12	-0.934292	-1.79505	0.000119924	0.000119924	0.00704166	341	tags=75%, list=2%, signal=73%	Ifi214/Trim11/Ifi204/Ifi203/Mndal/Ifi211/Ifi209/Ifi206/Ifi213
GO:0016126	sterol biosynthetic process	45	0.719511	1.86281	0.000121609	0.000121609	0.00704788	616	tags=31%, list=4%, signal=30%	Dhcr24/Sqle/Fdps/Idi1/Ch25h/Cyp51/Msmo1/Mvd/Srebf2/Hmgcs1/Pmvk/Insig1/Cyb5r3/Fdft1
GO:0001794	type IIa hypersensitivity	15	-0.911409	-1.79265	0.000124169	0.000124169	0.00704788	543	tags=73%, list=4%, signal=71%	Fcgr3/H2-K1/H2-D1/Fcgr2b/H2-T22/Fcgr1/H2-Q4/H2-Q6/H2-Q7/Fcgr4/H2-T23
GO:0002445	type II hypersensitivity	15	-0.911409	-1.79265	0.000124169	0.000124169	0.00704788	543	tags=73%, list=4%, signal=71%	Fcgr3/H2-K1/H2-D1/Fcgr2b/H2-T22/Fcgr1/H2-Q4/H2-Q6/H2-Q7/Fcgr4/H2-T23
GO:0141085	regulation of inflammasome-mediated signaling pathway	48	-0.777384	-1.82461	0.000129717	0.000129717	0.00728188	1086	tags=33%, list=7%, signal=31%	Mefv/Trim11/Eif2ak2/Myd88/Igtp/Irgm2/Ifi204/Trim30a/Gbp2/Ifi203/Mndal/Irgm1/Ifi211/Ifi209/Ifi206/Ifi213
GO:0048251	elastic fiber assembly	10	-0.941729	-1.78201	0.000131424	0.000131424	0.0072932	94	tags=30%, list=1%, signal=30%	Ltbp4/Tnxb/Myh11
GO:0032639	TRAIL production	10	-0.941045	-1.78072	0.00013563	0.00013563	0.0072932	407	tags=80%, list=3%, signal=78%	H2-Q10/H2-K1/H2-D1/H2-T22/H2-Q4/H2-Q6/H2-Q7/H2-T23
GO:0032679	regulation of TRAIL production	10	-0.941045	-1.78072	0.00013563	0.00013563	0.0072932	407	tags=80%, list=3%, signal=78%	H2-Q10/H2-K1/H2-D1/H2-T22/H2-Q4/H2-Q6/H2-Q7/H2-T23
GO:0032759	positive regulation of TRAIL production	10	-0.941045	-1.78072	0.00013563	0.00013563	0.0072932	407	tags=80%, list=3%, signal=78%	H2-Q10/H2-K1/H2-D1/H2-T22/H2-Q4/H2-Q6/H2-Q7/H2-T23
GO:0019637	organophosphate metabolic process	785	0.359102	1.34204	0.0001427	0.0001427	0.00753001	1823	tags=20%, list=12%, signal=19%	Fdps/Aldoc/Idi1/Pgk1/Pkm/Aldoa/Tpi1/Ampd3/Pfkl/Pgam1/Pdk1/Ldha/Nupr1/Eno1/Mtmr10/Gapdh/Mvd/Sgms2/Txnrd1/Dbi/Tk1/Myc/Hmgcs1/Inpp4b/Nme1/Pik3r5/Vcp/Ldlr/Pfkp/Ran/Ndufab1/Capn2/Pdgfa/Slc27a1/Agpat5/Lyst/Pgd/Plaat3/Ugp2/Aprt/Pik3r1/Park7/Pmvk/Pgp/Nme2/Dtymk/Nus1/Dera/Fabp5/Myh9/Acsl1/Ndufb8/Dnm1l/Ndufb9/Dut/Htr2b/Fdft1/Fdx1/Gpi1/Atp6v1a/Mtmr12/Ptpmt1/Hif1a/Itpa/Ndufb10/Kcnab2/Impdh1/Ndufb6/Mthfd2l/Nd…
GO:0051607	defense response to virus	251	-0.565839	-1.63781	0.000142982	0.000142982	0.00753001	1427	tags=29%, list=10%, signal=27%	Pde12/Cd37/Itch/Mov10/Trim41/Ifi214/Spon2/Oas1a/Cd40/Senp7/Ticam2/Il15/Trim11/Isg20/Trim34a/Trim8/Gbp7/Pcbp2/Irf5/Abcc9/Eif2ak2/Ifnar2/Cgas/Il10rb/Trim25/Map3k14/Tlr7/Myd88/Znfx1/Trim12a/Irf2/Ifngr1/Trim12c/Dhx58/Apobec1/Rnasel/Igtp/Irgm2/Bst2/Slfn8/Ifi204/Samhd1/Unc93b1/Serinc3/Dtx3l/Trim30a/Fgl2/Pml/Sertad3/Ifit3b/Oas2/Parp9/Irf1/Stat1/Trim30d/Ifi203/Oasl2/Ifit3/Ddx60/Stat2/Mndal/Irgm1/Ifitm3/I…
GO:0072224	metanephric glomerulus development	11	-0.938323	-1.79275	0.000145332	0.000145332	0.00757566	168	tags=36%, list=1%, signal=36%	Pdgfrb/Pdgfra/Aqp1/Agtr2
GO:0000122	negative regulation of transcription by RNA polymerase II	750	-0.463202	-1.44331	0.000146868	0.000146868	0.00757842	1847	tags=20%, list=13%, signal=18%	Txnip/Smo/Jun/Ldb1/Nr2c2/Zfp148/Zfp958/Zfp658/Six1/Ndn/Phf21a/Hdac7/Snai2/Zfhx3/Zbtb45/Sirt7/Lmo1/Eed/Rbbp4/Ppard/Lin37/Runx3/Snw1/Zfp219/Phf12/Nop53/Prkaca/Hbp1/Hdac5/Rreb1/Zfp386/Zmynd8/Rpl10-ps3/Kat2b/Pde2a/Zbtb4/Sp2/Smarcc2/Bmi1/Nr2c1/Ifi214/Cbx6/Rpl10/Nfatc1/Sema4d/Bach1/Gatad2b/Nr1h2/Pparg/Zbtb1/Flcn/Ezh1/Rarg/Atf7ip/Nr1d1/Mier1/Cic/Atf7/Dab2ip/Mospd1/Zbtb34/Hmg20a/Aebp1/Tcf4/Cbx3/Cebpa/Bac…
GO:0001570	vasculogenesis	81	-0.710161	-1.78372	0.000149683	0.000149683	0.00764646	895	tags=23%, list=6%, signal=22%	Nrp1/Rin2/Ccm2/Tgfbr2/Amot/Rasip1/Hhex/Eng/Junb/Notch1/Kdr/Tgfbr3/Pdgfrb/Cav1/Ramp2/Egfl7/Cd34/Aplnr/Sox18
GO:0048568	embryonic organ development	372	-0.527951	-1.58147	0.000156662	0.000156662	0.0079237	1840	tags=22%, list=12%, signal=20%	Smo/Ldb1/Wnt11/Six1/Arnt/Syf2/Clic5/Tgfb3/Dvl3/Lrp6/Myo6/Insig2/Pkd1/Enpp1/Kitl/Ripor2/Tbc1d23/Ece1/Rpl10-ps3/Zfp36l1/Sp3/Sp2/Bmi1/Triobp/Rpl10/Kmt2a/Uty/Ncoa6/Tnrc6c/Rarg/Ednra/Flt3l/Sod1/Gdf3/Itga4/Lmo2/Pbx2/Rpl38/Cebpa/Ncoa3/Tgfbr2/Hs6st1/Arid1a/Stk4/Prrx1/Slc39a1/Sh2b3/Egfr/Kat6a/Hhex/Eng/Rarres2/Mef2c/Ndst1/Mfap2/Hlx/Hspg2/Cebpb/Pbx1/Junb/Rara/Notch2/Vegfa/Notch1/Tcf7l2/Pkdcc/Cdkn1c/Tmem94/K…
GO:0007167	enzyme-linked receptor protein signaling pathway	760	-0.46142	-1.44076	0.000160511	0.000160511	0.00803878	1238	tags=15%, list=8%, signal=14%	Lcp2/Htra3/Epha3/Pparg/Dok1/Tnrc6c/Flcn/Smpd3/Nrp1/Syk/Tspan9/C2cd5/Fut8/Gdf3/Fermt2/Pxn/Casp3/Dab2ip/Clasp2/Ddr2/Zyx/Tcf4/Lgals9/Lpxn/Ulk1/Pip4k2a/Tgfbr2/Sptbn1/Tgif1/Gcnt2/Hck/Sh2b3/Egfr/Arid4a/Hhex/Ptp4a3/Arf4/Pdcd4/Csf1r/Eng/Rarres2/Ep300/Gigyf1/Insr/Adipor1/Zbtb7b/Stat3/Myd88/Pdk2/Gpr155/Rbpms/Acvrl1/Numa1/Nedd9/Ndst1/Plat/Stat5b/Dusp22/Dcn/Il6st/Snx5/Sorl1/Map3k1/Marcks/Bambi/Notch2/Pik3cd/…
GO:1902969	mitotic DNA replication	16	0.861966	1.87356	0.0001625	0.0001625	0.00805939	1093	tags=44%, list=7%, signal=41%	Mcm2/Tk1/Mcm3/Mcm4/Lig1/Mcm6/Pola1
GO:0030510	regulation of BMP signaling pathway	73	-0.714694	-1.77564	0.000167971	0.000167971	0.00813805	734	tags=22%, list=5%, signal=21%	Eng/Gpr155/Acvrl1/Numa1/Sorl1/Bambi/Notch2/Notch1/Tcf7l2/Kdr/Hes1/Nbl1/Tgfbr3/Cav1/Rgma/Cdh5
GO:2000566	positive regulation of CD8-positive, alpha-beta T cell proliferation	11	-0.936312	-1.78891	0.000168333	0.000168333	0.00813805	407	tags=73%, list=3%, signal=71%	H2-Q10/H2-K1/H2-D1/H2-T22/H2-Q4/H2-Q6/H2-Q7/H2-T23
GO:0031349	positive regulation of defense response	433	-0.518761	-1.56896	0.000168865	0.000168865	0.00813805	1411	tags=22%, list=10%, signal=21%	Pde2a/H2-Q10/Gramd4/Itch/Tifa/Trim41/Ifi214/Oas1a/Rab11fip2/Sec14l1/Matr3/Cd274/Syk/Ticam2/Pum2/Aoc3/Nr1d1/Mefv/Trim11/Nmi/Dab2ip/Gbp7/Casp12/Pcbp2/Lgals9/Cebpa/Cd47/Gsdmd/Ctss/Ifi35/Casp6/Eif2ak2/Cgas/Pdcd4/Csf1r/Osm/Trim25/Mef2c/Tlr7/Cd14/Myd88/Tnfrsf1a/Znfx1/Trim12a/Stat5b/Fcgr3/Irak2/Ccl24/Irf2/Gbp3/Cebpb/Trim12c/Dhx58/Igtp/H2-K1/Tlr1/Irgm2/H2-D1/Ly96/Ifi204/Unc93b1/Trim30a/Gbp2/H2-M3/H2-T22/…
GO:0009152	purine ribonucleotide biosynthetic process	147	0.545512	1.70752	0.000179011	0.000179011	0.00854641	2760	tags=39%, list=19%, signal=32%	Aldoa/Ampd3/Pdk1/Eno1/Myc/Nme1/Vcp/Ndufab1/Aprt/Nme2/Acsl1/Ndufb8/Ndufb9/Ndufb10/Impdh1/Ndufb6/Ndufs5/Bcl2l1/Gmpr/Pank3/Ndufc1/Mpc1/Ndufa8/Stoml2/Ndufs8/Nudt2/Pdk3/Mthfd1/Acot7/Ndufs7/Papss1/Ndufb7/Ndufv2/Mpc2/Ndufs6/Slc25a13/Ndufb2/Ndufb5/Vdac1/Adcy3/Ndufs1/Ndufb11/Ak2/Ndufs4/Coasy/Parp1/Nme6/Ndufc2/Sdhc/Dld/Guk1/Pdha1/Adsl/Acly/Gmps/Ndufv3/Ndufa11/Eno1b
GO:0070663	regulation of leukocyte proliferation	245	-0.576654	-1.66191	0.000182932	0.000182932	0.00865272	1438	tags=23%, list=10%, signal=21%	Tnfrsf1b/H2-Q10/Cd37/Laptm5/Itch/Mad1l1/Bmi1/Cd40/Cd274/Syk/Flt3l/Il15/Sash3/Casp3/Lgals9/Gstp1/Tgfbr2/Tnfrsf21/Hhex/Csf1r/Mef2c/Zbtb7b/Myd88/Stat5b/Rac2/Bcl6/Cdkn1a/Il6st/Cebpb/H2-K1/H2-D1/Fcgr2b/Pla2g2d/Csf2rb/Icosl/Lst1/H2-T22/Hes1/Irf1/Cd22/Cd300a/Card11/H2-Q4/H2-Q6/Cd28/Ccr2/H2-Q7/Irgm1/H2-T23/Cd74/H2-DMb1/H2-Aa/Ighm/Slfn1/Cd38/Clec2i/Igf2
GO:0061326	renal tubule development	75	-0.720042	-1.79384	0.00018913	0.00018913	0.00883353	666	tags=19%, list=5%, signal=18%	Mef2c/Ctns/Pbx1/Notch2/Vegfa/Notch1/Wwtr1/Hes1/Stat1/Col4a1/Heyl/Lama5/Aqp1/Agtr2
GO:1904018	positive regulation of vasculature development	154	-0.62626	-1.72033	0.000190213	0.000190213	0.00883353	636	tags=16%, list=4%, signal=15%	Eng/Stat3/Rhob/Acvrl1/Tnfrsf1a/Ccl24/Ctsh/Btg1/Nfe2l2/Pik3cd/Vegfa/Jup/Kdr/Smoc2/Thbs1/Cxcr4/Cxcl12/Flt1/Ramp2/Igf2/Cd34/Aplnr/Aqp1/Cdh5
GO:0002250	adaptive immune response	359	-0.531516	-1.58821	0.000206695	0.000206695	0.00951248	1210	tags=22%, list=8%, signal=21%	Cd40/Zbtb1/Cd274/Syk/Mcoln1/C3ar1/Sash3/H2-T24/C1qc/Kmt5c/Cx3cr1/Il6ra/Bach2/Klhl6/Il21r/Adcy7/Tap2/Samsn1/Tnfrsf21/Mef2c/Zbtb7b/Stat3/Myd88/Nfkbid/B2m/Clec4a2/Cd79b/Dusp22/Fcgr3/Il4ra/Bcl6/Ctsh/Hlx/Orai1/Dennd1b/Csk/Ly9/H2-K1/Pou2f2/Pik3cd/H2-D1/Slamf7/Sema4a/Fcgr2b/Vegfa/Csf3r/Serping1/Tap1/Csf2rb/C1ra/Notch1/Fosl2/Icosl/Unc93b1/Fgl2/H2-M3/Bcl3/H2-T22/Arid5a/Irf1/Fcgr1/H2-Q4/H2-Q6/Cd28/Ccr2/H2-…
GO:0032102	negative regulation of response to external stimulus	327	-0.535965	-1.59046	0.000210763	0.000210763	0.00961308	1449	tags=24%, list=10%, signal=22%	Phldb2/Tnfrsf1b/H2-Q10/Itch/Clec2d/Ifi214/Oas1a/Sharpin/Sema4d/Sema5a/Ash1l/Pparg/Nrp1/Nr1d1/Sod1/Cx3cr1/Dtx4/Mefv/Nmi/Clasp2/Pcbp2/Serpine2/Lgals9/Gstp1/Sema6d/Il10ra/Sh2b3/Tap2/Tnfaip8l2/Sema6b/Elf4/C5ar2/Stat3/Adar/Trib1/C1qtnf1/Tnfrsf1a/Plat/Aph1c/Rin3/Dhx58/Parp14/Trafd1/Igtp/H2-K1/Irgm2/H2-D1/Sema4a/Fcgr2b/Serping1/Zfp36/Tap1/Notch1/Ifi204/Samhd1/Fgl2/H2-T22/Thbs1/Nlrc5/Nbl1/Ifi203/H2-Q4/H2…
GO:0032103	positive regulation of response to external stimulus	556	-0.488901	-1.50518	0.000218175	0.000218175	0.00986309	1411	tags=22%, list=10%, signal=21%	Pde2a/H2-Q10/Gramd4/Itch/Tifa/Trim41/Ifi214/Cttn/Oas1a/Rab11fip2/Cdh13/Sema5a/Lpar1/Sec14l1/Matr3/Nrp1/Cd274/Syk/Ednra/Ticam2/Pum2/Aoc3/C3ar1/Scarf1/Nr1d1/Cx3cr1/P2ry12/Mefv/Trim11/Nmi/Dab2ip/Gbp7/Casp12/Pcbp2/Camk1d/Lgals9/Cebpa/Cd47/Gsdmd/Ctss/Ifi35/Casp6/Eif2ak2/Cgas/Pdcd4/Csf1r/Rarres2/Osm/P2rx4/Trim25/Tlr7/Cd14/Myd88/Nedd9/Tnfrsf1a/Znfx1/Trim12a/Plat/Stat5b/Rac2/Fcgr3/Irak2/Ccl24/Irf2/Gbp3/C…
GO:0061615	glycolytic process through fructose-6-phosphate	24	0.814914	1.88362	0.000228132	0.000228132	0.0102228	803	tags=42%, list=5%, signal=39%	Pgk1/Pkm/Aldoa/Tpi1/Pfkl/Eno1/Gapdh/Pfkp/Gpi1/Galk1
GO:0050829	defense response to Gram-negative bacterium	50	-0.760929	-1.80275	0.00024037	0.00024037	0.0106215	930	tags=26%, list=6%, signal=24%	Gsdmd/Lyz2/Rarres2/B2m/Naip5/Igtp/Irgm2/Irgm1/Iigp1/Tslp/Ighm/Rnase6/Aqp1
GO:0061024	membrane organization	631	0.371928	1.36082	0.000243015	0.000243015	0.0106215	1971	tags=24%, list=13%, signal=22%	Dhcr24/Ch25h/Bnip3/S100a10/Plec/Ndrg1/Baiap2/Stx11/Adam8/Diaph3/Eea1/Spire1/Itgam/Kcnn4/Anxa1/Abcc1/Chchd6/Lmna/Myc/Stx3/Timm13/Cd24a/Anxa2/Msr1/Ubl4a/Prelid1/Fchsd2/Exoc5/Trappc6a/Plaat3/Uso1/Hsp90aa1/Erc1/Pdcd5/Pmp22/Rab8b/Gsn/Coro1c/Sgta/Myh9/Immt/Dnm1l/Timm10/Brox/Insig1/Sec23b/Bin1/Emc8/C3/Chmp2b/Cd36/Asap1/Arl8b/Elmo1/Hspa4/Kif5b/Dnajc11/Pacsin2/Tomm40/Stx4a/Arfgap2/Ahnak/Bcl2l1/Itgb1/Gnai3…
GO:0002460	adaptive immune response based on somatic recombination of immune receptors built from immunoglobulin superfamily domains	270	-0.547002	-1.58909	0.000243269	0.000243269	0.0106215	1210	tags=23%, list=8%, signal=22%	Cd40/Zbtb1/Cd274/C3ar1/Sash3/H2-T24/C1qc/Kmt5c/Il6ra/Bach2/Klhl6/Il21r/Tap2/Mef2c/Zbtb7b/Stat3/Myd88/Nfkbid/B2m/Dusp22/Fcgr3/Il4ra/Bcl6/Ctsh/Hlx/Dennd1b/Ly9/H2-K1/Pou2f2/H2-D1/Sema4a/Fcgr2b/Vegfa/Csf3r/Serping1/Csf2rb/C1ra/Notch1/Fosl2/Icosl/Unc93b1/Fgl2/H2-M3/Bcl3/H2-T22/Arid5a/Irf1/Fcgr1/H2-Q4/H2-Q6/Cd28/Ccr2/H2-Q7/Fcgr4/Il18bp/Batf/H2-T23/H2-DMa/Cd74/Ighm/Irf7/H2-Ab1/C1s1
GO:0002696	positive regulation of leukocyte activation	313	-0.532622	-1.56871	0.000248186	0.000248186	0.0106568	1210	tags=20%, list=8%, signal=19%	Cd40/Zbtb1/Cd274/Syk/Ticam2/Flt3l/Il15/Sash3/Kmt5c/Lgals9/Cebpa/Cd47/Tgfbr2/Jund/Arid1a/Sirpb1a/Csf1r/Mef2c/Zbtb7b/Myd88/Nfkbid/B2m/Stat5b/Sox4/Il4ra/Bcl6/Cdkn1a/Hlx/Il6st/Rara/H2-K1/H2-D1/Icosl/Cd300lb/Cd83/H2-T22/Hes1/Rhoh/Thbs1/Irf1/Gm5150/Card11/Sirpb1c/H2-Q4/H2-Q6/Cd28/Ccr2/H2-Q7/Irgm1/Sirpb1b/Axl/H2-T23/H2-DMa/Cd74/Il16/H2-Eb1/H2-DMb1/Tslp/H2-Aa/Cav1/Ighm/Cd38/H2-Ab1/Igf2
GO:0009165	nucleotide biosynthetic process	205	0.48091	1.56652	0.000248248	0.000248248	0.0106568	1823	tags=25%, list=12%, signal=23%	Aldoa/Ampd3/Pdk1/Eno1/Tk1/Myc/Nme1/Vcp/Ndufab1/Aprt/Nme2/Dtymk/Acsl1/Ndufb8/Ndufb9/Dut/Ndufb10/Impdh1/Ndufb6/Mthfd2l/Ndufs5/Bcl2l1/Gmpr/Rrm1/Pank3/Ndufc1/Mpc1/Ndufa8/Stoml2/Ndufs8/Nudt2/Uck2/Pdk3/Mthfd1/Acot7/Ndufs7/Papss1/Ndufb7/Ndufv2/Mpc2/Ndufs6/Slc25a13/Ndufb2/Ndufb5/Idh2/Vdac1/Adcy3/Tbpl1/Ndufs1/Tyms/Ndufb11/Ak2
GO:0007043	cell-cell junction assembly	104	-0.669599	-1.74497	0.000253494	0.000253494	0.0107913	592	tags=11%, list=4%, signal=10%	Acvrl1/F11r/Jup/Ace/Pecam1/Cav1/Ramp2/Esam/Cldn5/Aplnr/Cdh5
GO:0009142	nucleoside triphosphate biosynthetic process	88	0.605197	1.77254	0.000262134	0.000262134	0.0110669	1818	tags=35%, list=12%, signal=31%	Aldoa/Eno1/Myc/Nme1/Vcp/Ndufab1/Nme2/Dtymk/Ndufb8/Ndufb9/Ndufb10/Impdh1/Ndufb6/Ndufs5/Bcl2l1/Ndufc1/Ndufa8/Stoml2/Ndufs8/Nudt2/Uck2/Ndufs7/Ndufb7/Ndufv2/Ndufs6/Slc25a13/Ndufb2/Ndufb5/Tbpl1/Ndufs1/Ndufb11
GO:2000564	regulation of CD8-positive, alpha-beta T cell proliferation	16	-0.89858	-1.77743	0.00026967	0.00026967	0.0112723	407	tags=56%, list=3%, signal=55%	H2-Q10/H2-K1/H2-D1/H2-T22/Irf1/H2-Q4/H2-Q6/H2-Q7/H2-T23
GO:0050777	negative regulation of immune response	172	-0.605768	-1.69034	0.000272281	0.000272281	0.0112723	637	tags=21%, list=4%, signal=20%	Zbtb7b/Adar/Dusp22/Il4ra/Bcl6/Hlx/Dhx58/Parp14/Trafd1/H2-K1/H2-D1/Fcgr2b/Serping1/Tap1/Ifi204/Samhd1/Fgl2/H2-T22/Irf1/Nlrc5/Cd300a/Ifi203/H2-Q4/H2-Q6/Stat2/Ccr2/H2-Q7/Mndal/Ifi211/H2-T23/Ifi209/Oas1g/Oas3/Igf2/Ifi206/Ifi213
GO:1901605	alpha-amino acid metabolic process	148	0.524363	1.64736	0.000274022	0.000274022	0.0112723	1685	tags=24%, list=11%, signal=21%	Ass1/Atp2b4/Txnrd1/P4ha1/Egln1/Odc1/Slc38a1/Gclm/Park7/Gcsh/Bcat2/Atf4/Oaz1/Mthfd2l/Icmt/Atp7a/Gclc/Prdx4/Got2/Pcmt1/Shmt2/Azin1/Slc7a11/Glud1/Mthfd1/Nit2/Scly/Spr/Qdpr/Gpt2/Oat/P4hb/Fh1/Asl/Dhfr
GO:0061001	regulation of dendritic spine morphogenesis	55	0.680477	1.8305	0.000277111	0.000277111	0.0112723	1196	tags=20%, list=8%, signal=18%	Cdk5r1/Arc/Lrp8/Baiap2/Pdlim5/Dnm1l/Caprin2/Caprin1/Dbnl/Cfl1/Pafah1b1
GO:0006119	oxidative phosphorylation	110	0.567794	1.71437	0.000278034	0.000278034	0.0112723	3142	tags=50%, list=21%, signal=40%	Tnf/Nupr1/Myc/Vcp/Ndufab1/Park7/Cox5a/Ndufb8/Coq7/Ndufb9/Gadd45gip1/Ndufb10/Ndufb6/Ndufs5/Uqcc2/Ndufc1/Atp7a/Ndufa8/Stoml2/Fxn/Shmt2/Ndufs8/Cox4i1/Uqcrq/Chchd2/Ndufs7/Ndufb7/Chchd10/Uqcr11/Ndufv2/Cox7b/Ndufs6/Ndufb2/Ndufb5/Ndufs1/Ndufb11/Ndufs4/Iscu/Ndufc2/Afg1l/Sdhc/Dld/Cox6a1/Ndufv3/Ndufa11/Rhoa/Cox7a2/Ccnb1/Cdk1/Cycs/Ndufa9/Ndufa10/Ndufb3/Ndufa12/Ndufa1
GO:0002370	natural killer cell cytokine production	10	-0.930509	-1.76078	0.000285278	0.000285278	0.011297	407	tags=80%, list=3%, signal=78%	H2-Q10/H2-K1/H2-D1/H2-T22/H2-Q4/H2-Q6/H2-Q7/H2-T23
GO:0002727	regulation of natural killer cell cytokine production	10	-0.930509	-1.76078	0.000285278	0.000285278	0.011297	407	tags=80%, list=3%, signal=78%	H2-Q10/H2-K1/H2-D1/H2-T22/H2-Q4/H2-Q6/H2-Q7/H2-T23
GO:0002729	positive regulation of natural killer cell cytokine production	10	-0.930509	-1.76078	0.000285278	0.000285278	0.011297	407	tags=80%, list=3%, signal=78%	H2-Q10/H2-K1/H2-D1/H2-T22/H2-Q4/H2-Q6/H2-Q7/H2-T23
GO:1903046	meiotic cell cycle process	165	0.508561	1.6057	0.000303863	0.000303863	0.0119404	2174	tags=22%, list=15%, signal=19%	Dnmt3l/Edn1/Mcm5/Wnt4/Spire1/Mcm2/Mcm3/Mcm7/Mcm4/Myh9/Calr/Psmd13/Hspa2/Mcm6/Cenpx/Rps6ka2/Cenps/Ccnb2/Birc5/Nsun2/Ddb1/Syce2/Dcaf13/Gsk3b/Fancm/Zwint/Topbp1/Espl1/Ncaph2/Mastl/Tdrkh/Ppp2r1a/Tubg1/Smc2/Bag6/Rad54l/Orc4
GO:0060997	dendritic spine morphogenesis	67	0.647126	1.80343	0.00031661	0.00031661	0.0123037	1196	tags=18%, list=8%, signal=17%	Cdk5r1/Arc/Lrp8/Baiap2/Pdlim5/Dnm1l/Dock10/Caprin2/Caprin1/Dbnl/Cfl1/Pafah1b1
GO:0002833	positive regulation of response to biotic stimulus	353	-0.524432	-1.56481	0.000317924	0.000317924	0.0123037	1404	tags=22%, list=10%, signal=20%	H2-Q10/Gramd4/Itch/Tifa/Trim41/Ifi214/Oas1a/Rab11fip2/Sec14l1/Matr3/Cd274/Syk/Ticam2/Pum2/Nr1d1/Mefv/Trim11/Nmi/Dab2ip/Gbp7/Pcbp2/Lgals9/Ifi35/Casp6/Eif2ak2/Cgas/Trim25/Tlr7/Cd14/Myd88/Znfx1/Trim12a/Stat5b/Irak2/Irf2/Gbp3/Trim12c/Dhx58/Igtp/H2-K1/Tlr1/Irgm2/H2-D1/Ly96/Ifi204/Unc93b1/Trim30a/Gbp2/H2-M3/H2-T22/Parp9/Irf1/Ly86/Nlrc5/Cd300a/Trim30d/Ifi203/H2-Q4/H2-Q6/Ddx60/Tifab/H2-Q7/Mndal/Irgm1/Tlr…
GO:0043043	peptide biosynthetic process	590	0.374445	1.36117	0.00032466	0.00032466	0.0124414	2542	tags=32%, list=17%, signal=27%	Pkm/Tnf/Ptrh1/Ppp1r15a/Cpeb4/Bdh2/Gapdh/Mrpl41/Gclm/Gspt1/Mrps6/Nat10/Larp4/Mrps28/Eif3b/Mrpl20/Mrpl54/Ncbp2/Syncrip/Calr/Mrpl12/Dapk1/Lrpprc/Dhx29/Mrpl51/Per2/Mrps12/Eif3a/Abce1/Dnajc3/Eif4g2/Srp9/Mrpl14/Mrps10/Eif4ebp1/Usp16/Gadd45gip1/Mrps14/C1qbp/Caprin2/Eif2s1/Eif4g1/Mrpl34/Eif5a/Uqcc2/Mrpl57/Mrpl43/Aurkaip1/Mrps15/Dap3/Coa3/Usp10/Ncl/Mrpl18/Ybx1/Mrps26/Caprin1/Mrps34/Hnrnpd/Eif4e2/Rpl13/Rwd…
GO:0002477	antigen processing and presentation of exogenous peptide antigen via MHC class Ib	12	-0.92345	-1.77423	0.000326353	0.000326353	0.0124414	829	tags=83%, list=6%, signal=79%	Tap2/B2m/H2-K1/H2-D1/H2-M3/H2-T22/H2-Q4/H2-Q6/H2-Q7/H2-T23
GO:0043392	negative regulation of DNA binding	46	-0.770176	-1.79123	0.000330423	0.000330423	0.0124551	341	tags=24%, list=2%, signal=23%	Tfap4/Zfp90/Ifi204/Ifi203/Sp100/Mndal/Ifi211/Ifi209/Nfib/Ifi206/Ifi213
GO:0016114	terpenoid biosynthetic process	11	0.906618	1.84179	0.000331589	0.000331589	0.0124551	217	tags=27%, list=1%, signal=27%	Fdps/Dhrs9/Hmgcs1
GO:0001779	natural killer cell differentiation	31	-0.815665	-1.78369	0.00033747	0.00033747	0.0125835	1378	tags=39%, list=9%, signal=35%	Sp3/Zbtb1/Flt3l/Il15/Lgals9/Ikzf1/Stat5b/Pbx1/Mertk/Irf1/Axl/Nfil3
GO:0006734	NADH metabolic process	37	0.731225	1.82469	0.000342413	0.000342413	0.0126272	630	tags=27%, list=4%, signal=26%	Pgk1/Pkm/Aldoa/Tpi1/Pfkl/Eno1/Gapdh/Vcp/Pfkp/Gpi1
GO:0046496	nicotinamide nucleotide metabolic process	151	0.523264	1.64976	0.000343586	0.000343586	0.0126272	1667	tags=23%, list=11%, signal=21%	Aldoc/Pgk1/Pkm/Aldoa/Tpi1/Pfkl/Pgam1/Ldha/Nupr1/Eno1/Gapdh/Txnrd1/Myc/Vcp/Pfkp/Pgd/Fdx1/Gpi1/Hif1a/Kcnab2/Noct/Galk1/Tkt/Pgls/Eif6/Hdac4/Hk3/Mdh2/Htr2a/Taldo1/Rpe/Trp53/Hk1/Idh2/App
GO:2000273	positive regulation of signaling receptor activity	24	0.807376	1.8662	0.000350934	0.000350934	0.0127893	947	tags=38%, list=6%, signal=35%	Cdk5r1/Arc/Edn1/Adam17/Adrb2/Park7/Hif1a/Il10/Rwdd1
GO:0034097	response to cytokine	753	-0.454203	-1.41741	0.000353003	0.000353003	0.0127893	1214	tags=18%, list=8%, signal=17%	Pparg/Dok1/Smpd3/Rarg/Cd274/Syk/Plvap/Ticam2/Ccl11/Kdm5b/Il15/Nr1d1/Cx3cr1/Mefv/Il6ra/Dab2ip/Gbp7/Zyx/Irf5/Cebpa/Birc3/Cd47/Casp8/Grk2/Il21r/Eif4a2/Zfp36l2/Il10ra/Sh2b3/Casp6/Rab20/Tnfrsf21/Eif2ak2/Ifnar2/Ptp4a3/Il10rb/Csf1r/Ep300/Osm/Rab43/Trim25/Mras/Insr/Gstt2/Adipor1/Asah1/Stat3/Cd14/Myd88/Adar/Tnfrsf1a/Etv3/Naip5/Stat5b/Synj1/Il4ra/Irak2/Ccl24/Gbp3/Nfe2l2/Ifngr1/Il6st/Daxx/Tut4/Nsmaf/Gm5431/…
GO:0051276	chromosome organization	493	0.39638	1.40436	0.000358476	0.000358476	0.0128961	2662	tags=27%, list=18%, signal=23%	Zranb3/Nup107/Mcm5/Rrs1/Anxa1/Mcm2/Sirt1/Lmna/Uhrf1/Myc/Gem/Naa50/Mcm3/Nat10/Nhp2/Ran/Kif2a/Nbn/Mcm7/Pcna/Mcm4/Hsp90aa1/Nasp/Cct3/Spdl1/Nup62/Spc24/Cct6a/Ddx1/Hspa2/Chmp2b/Ten1/Pinx1/Cct2/Sfpq/Itpa/Hnrnpa2b1/Mcm6/Ncapg2/Smg5/Smarca4/Cdt1/Tcp1/Actl6a/Cenpx/Hnrnpd/Mapre1/Birc5/Senp6/Ezh2/Pphln1/Top1/Nek6/Flna/Gins2/Gch1/Ascc3/Dhx9/Ptges3/Cct8/Smc3/Cdk5rap2/Gnl3/Cct7/Gtf2b/Syce2/Anapc15/Zwint/Rab11a…
GO:1905477	positive regulation of protein localization to membrane	99	0.574441	1.71602	0.000361669	0.000361669	0.01292	2109	tags=28%, list=14%, signal=24%	Cdk5r1/Ccl2/Tnf/Atp2b4/Itgam/Stx3/Lgals3/Cd81/Hras/Pdcd5/Cib1/Ezr/Slc5a3/Kif5b/Stx4a/Itgb1/Stac2/Zdhhc5/Pik3ca/Rab11a/Arpc2/Fnta/Rangrf/Commd1/Cnst/Mff/Fyn/Mesd
GO:0070848	response to growth factor	538	-0.479735	-1.47109	0.000375313	0.000375313	0.0130803	1230	tags=15%, list=8%, signal=14%	Kmt2a/Htra3/Pparg/Tnrc6c/Flcn/Smpd3/Nrp1/Fut8/Gdf3/Fermt2/Pxn/Casp3/Dab2ip/Zyx/Apaf1/Tcf4/Lgals9/Lpxn/Ulk1/Grk2/Tgfbr2/Zfp36l2/Gcnt2/Egfr/Arid4a/Ehd4/Hhex/Ptp4a3/Pdcd4/Eng/Ep300/Mef2c/Insr/Stat3/Gpr155/Acvrl1/Numa1/Ndst1/Stat5b/Dusp22/Dcn/Sorl1/Map3k1/Bambi/Ddit3/Nr4a1/Notch2/Pik3cd/Vegfa/Fos/Nrros/Zfp36/Notch1/Tcf7l2/Grb10/Cdkn1c/Pml/Kdr/Zeb1/Smoc2/Hes1/Thbs1/Nfia/Nbl1/Tgfbr3/Pdgfrb/Peg10/Adamts…
GO:0019362	pyridine nucleotide metabolic process	153	0.521437	1.65015	0.000375779	0.000375779	0.0130803	1667	tags=23%, list=11%, signal=21%	Aldoc/Pgk1/Pkm/Aldoa/Tpi1/Pfkl/Pgam1/Ldha/Nupr1/Eno1/Gapdh/Txnrd1/Myc/Vcp/Pfkp/Pgd/Fdx1/Gpi1/Hif1a/Kcnab2/Noct/Galk1/Tkt/Pgls/Eif6/Hdac4/Hk3/Mdh2/Htr2a/Taldo1/Rpe/Trp53/Hk1/Idh2/App
GO:0002715	regulation of natural killer cell mediated immunity	48	-0.757873	-1.77881	0.000377005	0.000377005	0.0130803	985	tags=27%, list=7%, signal=25%	Lgals9/Tap2/Stat5b/H2-K1/H2-D1/Tap1/H2-M3/H2-T22/H2-Q4/H2-Q6/H2-Q7/H2-T23/Igf2
GO:0046032	ADP catabolic process	88	0.596586	1.74732	0.000377219	0.000377219	0.0130803	803	tags=18%, list=5%, signal=17%	Aldoc/Pgk1/Pkm/Aldoa/Tpi1/Ampd3/Pfkl/Pgam1/Nupr1/Eno1/Gapdh/Myc/Pfkp/Gpi1/Hif1a/Galk1
GO:0035456	response to interferon-beta	58	-0.731146	-1.76227	0.000380127	0.000380127	0.0130803	508	tags=38%, list=3%, signal=37%	Gbp3/Gm5431/Igtp/Irgm2/Bst2/Ifi204/Gbp2/Irf1/Stat1/Ifi203/Ifit3/Mndal/Irgm1/Ifitm3/Ifi211/Ifi209/Xaf1/Ifi47/Iigp1/Oas1g/Ifi206/Ifi213
GO:0070585	protein localization to mitochondrion	94	0.594061	1.7604	0.000381519	0.000381519	0.0130803	1953	tags=36%, list=13%, signal=32%	Bbc3/Rala/Timm13/Isg15/Chchd4/Bag3/Hsp90aa1/Hspd1/Pdcd5/Dnm1l/Timm10/Bag1/Timm8a1/Hspa4/Tomm40/Timm17a/Pmpca/Bax/Tomm70a/Dnlz/Timm17b/Pam16/Timm23/Grpel1/Samm50/Dnajc19/Hk1/Timm22/Tomm20/Cox18/Tspo/Maip1/Mff/Sh3glb1
GO:0071363	cellular response to growth factor stimulus	524	-0.483218	-1.48052	0.000389268	0.000389268	0.0132205	1253	tags=15%, list=8%, signal=15%	Kmt2a/Htra3/Pparg/Tnrc6c/Flcn/Smpd3/Nrp1/Fut8/Gdf3/Fermt2/Pxn/Casp3/Dab2ip/Zyx/Apaf1/Tcf4/Lgals9/Lpxn/Ulk1/Grk2/Tgfbr2/Zfp36l2/Gcnt2/Egfr/Arid4a/Ehd4/Hhex/Ptp4a3/Pdcd4/Eng/Ep300/Mef2c/Insr/Stat3/Gpr155/Acvrl1/Numa1/Ndst1/Stat5b/Dusp22/Dcn/Sorl1/Map3k1/Bambi/Nr4a1/Notch2/Pik3cd/Vegfa/Fos/Nrros/Zfp36/Notch1/Tcf7l2/Grb10/Cdkn1c/Pml/Kdr/Zeb1/Smoc2/Hes1/Thbs1/Nfia/Nbl1/Tgfbr3/Pdgfrb/Peg10/Adamts12/Pdg…
GO:0032816	positive regulation of natural killer cell activation	35	-0.796683	-1.78868	0.000393499	0.000393499	0.0132205	1404	tags=43%, list=10%, signal=39%	H2-Q10/Zbtb1/Ticam2/Flt3l/Il15/Stat5b/H2-K1/H2-D1/H2-T22/Irf1/H2-Q4/H2-Q6/H2-Q7/Axl/H2-T23
GO:0001935	endothelial cell proliferation	145	-0.620197	-1.69431	0.000394809	0.000394809	0.0132205	767	tags=17%, list=5%, signal=16%	Ang/Eng/Mef2c/Stat3/Acvrl1/Scarb1/Ccl24/Hspg2/Nr4a1/Pik3cd/Vegfa/Kdr/Col18a1/Thbs1/Stat1/Apoe/Cxcl12/Flt1/Cav1/Igf2/Egfl7/Cd34/Aplnr/Dlk1
GO:0009201	ribonucleoside triphosphate biosynthetic process	82	0.605279	1.74867	0.000398446	0.000398446	0.0132205	3142	tags=52%, list=21%, signal=41%	Aldoa/Eno1/Myc/Nme1/Vcp/Ndufab1/Nme2/Ndufb8/Ndufb9/Ndufb10/Impdh1/Ndufb6/Ndufs5/Bcl2l1/Ndufc1/Ndufa8/Stoml2/Ndufs8/Nudt2/Uck2/Ndufs7/Ndufb7/Ndufv2/Ndufs6/Slc25a13/Ndufb2/Ndufb5/Ndufs1/Ndufb11/Ndufs4/Parp1/Nme6/Ndufc2/Sdhc/Ndufv3/Ndufa11/Eno1b/Ndufa9/Cad/Ndufa10/Ndufb3/Ndufa12/Ndufa1
GO:0051251	positive regulation of lymphocyte activation	287	-0.536623	-1.57327	0.000398549	0.000398549	0.0132205	1210	tags=20%, list=8%, signal=19%	Cd40/Zbtb1/Cd274/Syk/Ticam2/Flt3l/Il15/Sash3/Kmt5c/Lgals9/Cd47/Tgfbr2/Arid1a/Sirpb1a/Csf1r/Mef2c/Zbtb7b/Myd88/Nfkbid/B2m/Stat5b/Sox4/Il4ra/Bcl6/Cdkn1a/Hlx/Il6st/Rara/H2-K1/H2-D1/Icosl/Cd83/H2-T22/Hes1/Rhoh/Irf1/Gm5150/Card11/Sirpb1c/H2-Q4/H2-Q6/Cd28/Ccr2/H2-Q7/Irgm1/Sirpb1b/Axl/H2-T23/H2-DMa/Cd74/H2-Eb1/H2-DMb1/H2-Aa/Cav1/Ighm/Cd38/H2-Ab1/Igf2
GO:0009887	animal organ morphogenesis	775	-0.448646	-1.39859	0.000408978	0.000408978	0.0134789	1225	tags=12%, list=8%, signal=11%	Tshz3/Ash1l/Uty/Rflnb/Smpd3/Nrp1/Rarg/Lamc1/Ednra/Ccl11/Kdm5b/Sod1/Ahdc1/Pbx2/Rpl38/Ncoa3/Tgfbr2/Abcc9/Arid1a/Prrx1/Slc39a1/Mdm4/Egfr/Casp6/Kat6a/Pim1/Ikzf1/Hhex/Fli1/Lama2/Idua/Pdcd4/Eng/Nab2/Ep300/Thra/Mef2c/Insr/Rogdi/Stat3/Foxo3/Acvrl1/Ndst1/Lamb1/Mfap2/Dhrs3/Sox4/Chsy1/Ctns/Adamts1/Ctsh/Hlx/Hspg2/Cebpb/Pbx1/Rara/Notch2/Lrp5/Vegfa/Notch1/Tcf7l2/Fosl2/Wwtr1/Pml/Kdr/Mmp2/Zeb1/Hes1/Id3/Thbs1/Cxc…
GO:1901293	nucleoside phosphate biosynthetic process	206	0.480614	1.56964	0.000412002	0.000412002	0.0134915	1823	tags=25%, list=12%, signal=22%	Aldoa/Ampd3/Pdk1/Eno1/Tk1/Myc/Nme1/Vcp/Ndufab1/Aprt/Nme2/Dtymk/Acsl1/Ndufb8/Ndufb9/Dut/Ndufb10/Impdh1/Ndufb6/Mthfd2l/Ndufs5/Bcl2l1/Gmpr/Rrm1/Pank3/Ndufc1/Mpc1/Ndufa8/Stoml2/Ndufs8/Nudt2/Uck2/Pdk3/Mthfd1/Acot7/Ndufs7/Papss1/Ndufb7/Ndufv2/Mpc2/Ndufs6/Slc25a13/Ndufb2/Ndufb5/Idh2/Vdac1/Adcy3/Tbpl1/Ndufs1/Tyms/Ndufb11/Ak2
GO:0019886	antigen processing and presentation of exogenous peptide antigen via MHC class II	20	-0.865398	-1.79915	0.000417314	0.000417314	0.0135784	876	tags=50%, list=6%, signal=47%	Ctss/B2m/Fcgr2b/Unc93b1/H2-DMa/Cd74/H2-Eb1/H2-DMb1/H2-Aa/H2-Ab1
GO:0000226	microtubule cytoskeleton organization	522	0.387748	1.38824	0.000421365	0.000421365	0.0136235	3000	tags=30%, list=20%, signal=25%	Cdk5r1/Ccnf/Hsph1/Plk2/Diaph3/Gadd45a/Gapdh/Spire1/Tuba1a/Sirt1/Lmna/Uhrf1/Fkbp4/Vcp/Tbcb/Nat10/Stmn1/Ranbp1/Kif2a/Tubb4b/Dst/Slk/Slain2/Spdl1/Myh9/Nup62/Cib1/Ttl/Ezr/Chmp2b/Fam110a/Bicd2/Cep290/Fbxw11/Itgb1/Ccnl1/Hook3/Phldb1/Ccnb2/Map7d1/Ssx2ip/Akap9/Mapre1/Birc5/Senp6/Azin1/Gas2l3/Flna/Cep350/Cfl1/Pdcd6ip/Mark2/Tbcd/Ddb1/Pafah1b1/Arhgef7/Plk3/Smc3/Cdk5rap2/Ttll5/Gtf2b/Dcaf13/Gsk3b/Rab11a/Dyrk1…
GO:0070201	regulation of establishment of protein localization	488	0.390286	1.3847	0.000429588	0.000429588	0.0137869	1907	tags=24%, list=13%, signal=21%	Ifnb1/Cdk5r1/Cyp51/Bbc3/Ccl2/Tnf/Pfkl/Rab11fip1/Mmp13/Itgam/Kcnn4/Anxa1/Sirt1/Mdm2/Chchd4/Txn1/Ran/Stxbp5/Cd81/Gripap1/Pik3r1/Bag3/Park7/Nsd2/Alox5/Hras/Lcp1/Hsp90aa1/Rest/Cct3/Dynll1/Pdcd5/Myh9/Dnm1l/Ufm1/Nup62/Cib1/Cct6a/Insig1/Adam9/Hsp90ab1/Per2/Ube2g2/Ccn3/Cd36/Kif5b/Vps35/Gpr68/Ppia/Ifi27/Oaz1/Ndfip2/Ptpmt1/Prkar1a/Cct2/Cep290/Hif1a/Scfd1/Rhbdf2/Stx4a/Uqcc2/Tcp1/Camk1/Rab34/Ywhae/Bsg/Anxa7/…
GO:0009154	purine ribonucleotide catabolic process	114	0.553266	1.683	0.000431816	0.000431816	0.0137869	1379	tags=21%, list=9%, signal=19%	Aldoc/Pgk1/Pkm/Aldoa/Tpi1/Ampd3/Pfkl/Pgam1/Nupr1/Eno1/Gapdh/Myc/Pfkp/Gpi1/Hif1a/Itpa/Galk1/Eif6/Nudt3/Acot7/Hdac4/Hk3/Htr2a/Xdh
GO:0009261	ribonucleotide catabolic process	123	0.542819	1.65773	0.000435112	0.000435112	0.0138058	1379	tags=20%, list=9%, signal=18%	Aldoc/Pgk1/Pkm/Aldoa/Tpi1/Ampd3/Pfkl/Pgam1/Nupr1/Eno1/Gapdh/Myc/Pfkp/Gpi1/Hif1a/Itpa/Galk1/Eif6/Nudt3/Acot7/Hdac4/Hk3/Htr2a/Xdh
GO:0050867	positive regulation of cell activation	331	-0.526535	-1.565	0.00043882	0.00043882	0.0138247	1210	tags=20%, list=8%, signal=19%	Cd40/Zbtb1/Cd274/Syk/Ticam2/Flt3l/Il15/Sash3/Kmt5c/Ddr2/Lgals9/Cebpa/Cd47/Tgfbr2/Jund/Arid1a/Sirpb1a/Csf1r/Mef2c/Zbtb7b/Myd88/Nfkbid/B2m/Stat5b/Sox4/Il4ra/Bcl6/Cdkn1a/Hlx/Il6st/Rara/H2-K1/H2-D1/Icosl/Cd300lb/Cd83/H2-T22/Hes1/Rhoh/Thbs1/Irf1/Gm5150/Card11/Sirpb1c/H2-Q4/H2-Q6/Pdgfrb/Cd28/Ccr2/H2-Q7/Irgm1/Sirpb1b/Axl/H2-T23/H2-DMa/Cd74/Il16/H2-Eb1/H2-DMb1/Tslp/H2-Aa/Cav1/Ighm/Cd38/H2-Ab1/Igf2
GO:0045766	positive regulation of angiogenesis	151	-0.617795	-1.6958	0.000441119	0.000441119	0.0138247	636	tags=21%, list=4%, signal=20%	Sema5a/Cd40/Nrp1/Ccl11/C3ar1/Cx3cr1/Pxn/Tgfbr2/Eng/Stat3/Rhob/Acvrl1/Tnfrsf1a/Ccl24/Ctsh/Btg1/Nfe2l2/Pik3cd/Vegfa/Jup/Kdr/Smoc2/Thbs1/Cxcr4/Flt1/Ramp2/Igf2/Cd34/Aplnr/Aqp1/Cdh5
GO:0099504	synaptic vesicle cycle	162	0.511616	1.61911	0.000448451	0.000448451	0.0139687	2183	tags=25%, list=15%, signal=21%	Cdk5r1/Stx11/Stx3/Cd24a/Stxbp5/Ap2s1/Atp6v1h/Gripap1/Erc1/Dnm1l/Bin1/Canx/Actg1/Atp6v1a/Arhgdia/Stx4a/Bcl2l1/Diaph1/Atp6v0a1/Atp2a2/Syt11/Cyfip1/Atp6v1c1/Dnm2/Atp6v1f/Atp6v1e1/Atp6v1g1/Scrib/Atp6ap2/Atp6v1d/Ap2m1/Npy/Atp6v1b2/Fbxo45/P2ry2/Mff/Rock1/Rap1b/Cacna1a/Snap47
GO:0006090	pyruvate metabolic process	109	0.582827	1.75799	0.000453227	0.000453227	0.014032	1667	tags=27%, list=11%, signal=24%	Slc16a3/Aldoc/Pgk1/Pkm/Aldoa/Tpi1/Pfkl/Pgam1/Pdk1/Ldha/Nupr1/Eno1/Gapdh/Myc/Pfkp/Gpi1/Hif1a/Galk1/Mpc1/Eif6/Pdk3/Hdac4/Hk3/Htr2a/Mpc2/Fahd1/Hk1/Vdac1/App
GO:0019674	NAD metabolic process	52	0.680841	1.82422	0.00046966	0.00046966	0.0144101	288	tags=19%, list=2%, signal=19%	Pgk1/Pkm/Aldoa/Tpi1/Pfkl/Ldha/Eno1/Gapdh/Vcp/Pfkp
GO:0006954	inflammatory response	638	-0.468885	-1.45412	0.000471965	0.000471965	0.0144101	1231	tags=18%, list=8%, signal=18%	Clec10a/Ash1l/Akna/Pparg/Syk/Ticam2/Ccl11/Aoc3/C3ar1/Nr1d1/Sod1/Cx3cr1/Mefv/Trim11/Nmi/Dab2ip/Casp12/Ggt5/Abhd12/Camk1d/Lgals9/Irf5/Cebpa/Cd47/Gsdmd/Gstp1/Per1/Ctss/Pld3/Adcy7/Il10ra/Ifi35/Hck/Egfr/Casp6/Tnfaip8l2/Eif2ak2/Abcd1/Pdcd4/Mgll/Csf1r/Elf4/Rarres2/Daglb/Osm/C5ar2/Tlr7/Stat3/Cd14/Myd88/Nfkbid/Tnfrsf1a/Ndst1/Naip5/Stat5b/Pld4/Fcgr3/Il4ra/Bcl6/Ccl24/Nfe2l2/Ifngr1/Cmklr1/Cebpb/Igtp/Nr4a1/H2…
GO:0046031	ADP metabolic process	92	0.58714	1.73467	0.000477629	0.000477629	0.0144101	803	tags=17%, list=5%, signal=17%	Aldoc/Pgk1/Pkm/Aldoa/Tpi1/Ampd3/Pfkl/Pgam1/Nupr1/Eno1/Gapdh/Myc/Pfkp/Gpi1/Hif1a/Galk1
GO:0042269	regulation of natural killer cell mediated cytotoxicity	47	-0.762105	-1.77931	0.00047798	0.00047798	0.0144101	985	tags=28%, list=7%, signal=26%	Lgals9/Tap2/Stat5b/H2-K1/H2-D1/Tap1/H2-M3/H2-T22/H2-Q4/H2-Q6/H2-Q7/H2-T23/Igf2
GO:0032673	regulation of interleukin-4 production	33	-0.812129	-1.80689	0.000479543	0.000479543	0.0144101	447	tags=45%, list=3%, signal=44%	Syk/Sash3/Cebpb/Ddit3/Rara/H2-K1/H2-D1/Icosl/Cd83/H2-T22/H2-Q4/H2-Q6/Cd28/H2-Q7/H2-T23
GO:0002885	positive regulation of hypersensitivity	15	-0.894108	-1.75862	0.000518743	0.000518743	0.0154731	543	tags=60%, list=4%, signal=58%	Fcgr3/H2-K1/H2-D1/H2-T22/Fcgr1/H2-Q4/H2-Q6/H2-Q7/H2-T23
GO:2000117	negative regulation of cysteine-type endopeptidase activity	72	-0.703233	-1.75321	0.000523623	0.000523623	0.0154731	724	tags=19%, list=5%, signal=19%	Cst3/Naip5/Cdkn2d/Nr4a1/Vegfa/Ifi204/Thbs1/Ifi203/Mndal/Ifi211/Ifi209/Ifi206/Ifi213/Aqp1
GO:0016052	carbohydrate catabolic process	127	0.537912	1.66345	0.000524007	0.000524007	0.0154731	803	tags=16%, list=5%, signal=15%	Aldoc/Pgk1/Pkm/Aldoa/Tpi1/Pfkl/Pgam1/Ldha/Nupr1/Eno1/Gapdh/Myc/Pgm1/Pfkp/Pgd/Dera/Pygm/Gpi1/Hif1a/Galk1
GO:0051640	organelle localization	526	0.3821	1.37734	0.000538739	0.000538739	0.015707	2651	tags=27%, list=18%, signal=23%	Map4k2/Stx11/Rrs1/Spire1/Tuba1a/Hmox1/Sirt1/Lmna/Stx3/Gem/Syne1/Exoc5/Ran/Sdc4/Trappc6a/Cep83/Uso1/Dynll1/Spdl1/Ykt6/Rab8b/Myh9/Dnm1l/Nup62/Spc24/Ttl/Ezr/Bin1/Chmp2b/Arl8b/Myo7a/Ccdc186/Abce1/Kif5b/Pinx1/Ralb/Arhgap21/Bicd2/Cep290/Fbxw11/Hif1a/Stx4a/Arfgap2/Bcl2l1/Itgb1/Hsbp1/Cdt1/Calm1/Atp2a2/Syt11/Stx8/Rab34/Hook3/Akap9/Lat2/Mapre1/Birc5/Dnm2/Vapa/Exoc6b/Eif6/Fhod1/Cfl1/Pdcd6ip/Steap3/Rab7/Pafa…
GO:0002396	MHC protein complex assembly	20	-0.857633	-1.78301	0.000541265	0.000541265	0.015707	610	tags=55%, list=4%, signal=53%	B2m/H2-K1/H2-D1/H2-Q4/H2-Q6/H2-Q7/H2-DMa/H2-Eb1/H2-DMb1/H2-Aa/H2-Ab1
GO:0002501	peptide antigen assembly with MHC protein complex	20	-0.857633	-1.78301	0.000541265	0.000541265	0.015707	610	tags=55%, list=4%, signal=53%	B2m/H2-K1/H2-D1/H2-Q4/H2-Q6/H2-Q7/H2-DMa/H2-Eb1/H2-DMb1/H2-Aa/H2-Ab1
GO:0072524	pyridine-containing compound metabolic process	161	0.513043	1.62743	0.000544227	0.000544227	0.015707	1667	tags=22%, list=11%, signal=19%	Aldoc/Pgk1/Pkm/Aldoa/Tpi1/Pfkl/Pgam1/Ldha/Nupr1/Eno1/Gapdh/Txnrd1/Myc/Vcp/Pfkp/Pgd/Fdx1/Gpi1/Hif1a/Kcnab2/Noct/Galk1/Tkt/Pgls/Eif6/Hdac4/Hk3/Mdh2/Htr2a/Taldo1/Rpe/Trp53/Hk1/Idh2/App
GO:0032616	interleukin-13 production	27	-0.832332	-1.80213	0.000563197	0.000563197	0.0160729	411	tags=37%, list=3%, signal=36%	Tnfrsf21/Rara/H2-K1/H2-D1/H2-T22/H2-Q4/H2-Q6/H2-Q7/H2-T23/Tslp
GO:0032656	regulation of interleukin-13 production	27	-0.832332	-1.80213	0.000563197	0.000563197	0.0160729	411	tags=37%, list=3%, signal=36%	Tnfrsf21/Rara/H2-K1/H2-D1/H2-T22/H2-Q4/H2-Q6/H2-Q7/H2-T23/Tslp
GO:0002486	antigen processing and presentation of endogenous peptide antigen via MHC class I via ER pathway, TAP-independent	16	-0.887706	-1.75592	0.00056802	0.00056802	0.0161205	407	tags=62%, list=3%, signal=61%	H2-Q10/H2-T24/H2-K1/H2-D1/H2-M3/H2-T22/H2-Q4/H2-Q6/H2-Q7/H2-T23
GO:0141084	inflammasome-mediated signaling pathway	53	-0.753178	-1.79521	0.000577543	0.000577543	0.0162121	1086	tags=30%, list=7%, signal=28%	Mefv/Trim11/Eif2ak2/Myd88/Igtp/Irgm2/Ifi204/Trim30a/Gbp2/Ifi203/Mndal/Irgm1/Ifi211/Ifi209/Ifi206/Ifi213
GO:0046166	glyceraldehyde-3-phosphate biosynthetic process	11	0.897482	1.82324	0.000577594	0.000577594	0.0162121	135	tags=45%, list=1%, signal=45%	Pgk1/Tpi1/Pgam1/Eno1/Gapdh
GO:0002495	antigen processing and presentation of peptide antigen via MHC class II	22	-0.854483	-1.78469	0.000585996	0.000585996	0.016358	876	tags=45%, list=6%, signal=43%	Ctss/B2m/Fcgr2b/Unc93b1/H2-DMa/Cd74/H2-Eb1/H2-DMb1/H2-Aa/H2-Ab1
GO:0002399	MHC class II protein complex assembly	10	-0.919898	-1.7407	0.000615844	0.000615844	0.0170054	610	tags=60%, list=4%, signal=58%	B2m/H2-DMa/H2-Eb1/H2-DMb1/H2-Aa/H2-Ab1
GO:0002503	peptide antigen assembly with MHC class II protein complex	10	-0.919898	-1.7407	0.000615844	0.000615844	0.0170054	610	tags=60%, list=4%, signal=58%	B2m/H2-DMa/H2-Eb1/H2-DMb1/H2-Aa/H2-Ab1
GO:0002717	positive regulation of natural killer cell mediated immunity	33	-0.807274	-1.79609	0.000619895	0.000619895	0.0170252	559	tags=27%, list=4%, signal=26%	Stat5b/H2-K1/H2-D1/H2-M3/H2-T22/H2-Q4/H2-Q6/H2-Q7/H2-T23
GO:0006066	alcohol metabolic process	247	0.447724	1.49439	0.000649128	0.000649128	0.0177327	1413	tags=18%, list=10%, signal=17%	Dhcr24/Sqle/Fdps/Idi1/Ch25h/Dhrs9/Cyp51/Tpi1/Apobr/Msmo1/Mvd/Wnt4/Srebf2/Hmgcs1/Ldlr/Park7/Pmvk/Pgp/Rest/Nus1/Pmp22/Adh5/Myh9/Stard4/Insig1/Hdlbp/Nfkb1/Cyb5r3/Fdft1/Fdx1/Slc5a3/Galk1/Por/Chka/Nfe2l1/Ldlrap1/Impa1/Gch1/Nudt3/Lima1/Dab2/Spr/Qdpr/Hmgcr/Hsd17b7
GO:0045954	positive regulation of natural killer cell mediated cytotoxicity	32	-0.813741	-1.80123	0.000671268	0.000671268	0.0182295	559	tags=28%, list=4%, signal=27%	Stat5b/H2-K1/H2-D1/H2-M3/H2-T22/H2-Q4/H2-Q6/H2-Q7/H2-T23
GO:0000727	double-strand break repair via break-induced replication	12	0.875216	1.7976	0.000674519	0.000674519	0.0182295	1092	tags=58%, list=7%, signal=54%	Mcm5/Mcm2/Mcm3/Mcm7/Mcm4/Mcm6/Gins2
GO:0002483	antigen processing and presentation of endogenous peptide antigen	21	-0.855708	-1.78674	0.000689236	0.000689236	0.0182295	1127	tags=62%, list=8%, signal=57%	H2-Q10/H2-T24/Tap2/B2m/H2-K1/H2-D1/Tap1/H2-M3/H2-T22/H2-Q4/H2-Q6/H2-Q7/H2-T23
GO:0019885	antigen processing and presentation of endogenous peptide antigen via MHC class I	21	-0.855708	-1.78674	0.000689236	0.000689236	0.0182295	1127	tags=62%, list=8%, signal=57%	H2-Q10/H2-T24/Tap2/B2m/H2-K1/H2-D1/Tap1/H2-M3/H2-T22/H2-Q4/H2-Q6/H2-Q7/H2-T23
GO:0002475	antigen processing and presentation via MHC class Ib	21	-0.85469	-1.78462	0.00069759	0.00069759	0.0182295	1127	tags=57%, list=8%, signal=53%	H2-Q10/H2-T24/Tap2/B2m/H2-K1/H2-D1/H2-M3/H2-T22/H2-Q4/H2-Q6/H2-Q7/H2-T23
GO:0001796	regulation of type IIa hypersensitivity	13	-0.900309	-1.74212	0.000699428	0.000699428	0.0182295	543	tags=69%, list=4%, signal=67%	Fcgr3/H2-K1/H2-D1/H2-T22/Fcgr1/H2-Q4/H2-Q6/H2-Q7/H2-T23
GO:0001798	positive regulation of type IIa hypersensitivity	13	-0.900309	-1.74212	0.000699428	0.000699428	0.0182295	543	tags=69%, list=4%, signal=67%	Fcgr3/H2-K1/H2-D1/H2-T22/Fcgr1/H2-Q4/H2-Q6/H2-Q7/H2-T23
GO:0002892	regulation of type II hypersensitivity	13	-0.900309	-1.74212	0.000699428	0.000699428	0.0182295	543	tags=69%, list=4%, signal=67%	Fcgr3/H2-K1/H2-D1/H2-T22/Fcgr1/H2-Q4/H2-Q6/H2-Q7/H2-T23
GO:0002894	positive regulation of type II hypersensitivity	13	-0.900309	-1.74212	0.000699428	0.000699428	0.0182295	543	tags=69%, list=4%, signal=67%	Fcgr3/H2-K1/H2-D1/H2-T22/Fcgr1/H2-Q4/H2-Q6/H2-Q7/H2-T23
GO:0060333	type II interferon-mediated signaling pathway	20	-0.852758	-1.77287	0.000706534	0.000706534	0.0183212	503	tags=50%, list=3%, signal=48%	Pparg/Ifngr1/Parp14/Igtp/Irgm2/Parp9/Irf1/Stat1/Nlrc5/Irgm1
GO:0002523	leukocyte migration involved in inflammatory response	21	0.786401	1.79353	0.000725238	0.000725238	0.0187112	394	tags=24%, list=3%, signal=23%	Ccl2/Adam8/Itgam/Cd24a/Alox5
GO:0051321	meiotic cell cycle	210	0.465131	1.51305	0.000736921	0.000736921	0.0189171	2212	tags=21%, list=15%, signal=18%	Dnmt3l/Edn1/Mcm5/Mki67/Wnt4/Spire1/Mcm2/Xlr/Mcm3/Nbn/Mcm7/Mcm4/Myh9/Calr/Psmd13/Hspa2/Mcm6/Cenpx/Rps6ka2/Cenps/Ccnb2/Birc5/Nsun2/Ddb1/Smc3/Syce2/Dcaf13/Gsk3b/Fancm/Zwint/Topbp1/Espl1/Ncaph2/Mastl/Tdrkh/Ppp2r1a/Rbbp8/Tubg1/Smc2/Hmga2/Bag6/Zfp318/Rad54l/Orc4/Utp14b
GO:0072080	nephron tubule development	68	-0.702471	-1.72691	0.000741221	0.000741221	0.0189323	666	tags=18%, list=5%, signal=17%	Mef2c/Ctns/Pbx1/Notch2/Vegfa/Notch1/Wwtr1/Hes1/Heyl/Lama5/Aqp1/Agtr2
GO:0042110	T cell activation	493	-0.475702	-1.45511	0.000765764	0.000765764	0.0193728	1448	tags=20%, list=10%, signal=19%	P2rx7/Tnfrsf1b/Zfp36l1/H2-Q10/Cd37/Laptm5/Itch/Slc11a1/Sp3/Mad1l1/Smarcc2/Bmi1/Kdelr1/Kmt2a/Pknox1/Zbtb1/Cd274/Syk/Fzd7/Il15/Sash3/Il6ra/Casp3/Lgals9/Cd47/Tgfbr2/Zfp36l2/Arid1a/Sh2b3/Sirpb1a/Tnfrsf21/Tnfaip8l2/Ikzf1/Ifnar2/Cgas/Elf4/Wwp1/Zbtb7b/Stat3/Nfkbid/B2m/Stat5b/Dusp22/Sox4/Rac2/Il4ra/Bcl6/Hlx/Csk/Il6st/Cd48/Cebpb/Ly9/Igtp/Rara/H2-K1/H2-D1/Slamf7/Sema4a/Pla2g2d/Ebi3/Fosl2/Icosl/Lfng/Fgl2/Cd…
GO:0050870	positive regulation of T cell activation	215	-0.559783	-1.58927	0.000766048	0.000766048	0.0193728	637	tags=17%, list=4%, signal=17%	Zbtb7b/Nfkbid/B2m/Stat5b/Sox4/Il4ra/Bcl6/Hlx/Il6st/Rara/H2-K1/H2-D1/Icosl/Cd83/H2-T22/Hes1/Rhoh/Irf1/Gm5150/Card11/Sirpb1c/H2-Q4/H2-Q6/Cd28/Ccr2/H2-Q7/Irgm1/Sirpb1b/H2-T23/H2-DMa/Cd74/H2-Eb1/H2-DMb1/H2-Aa/Cav1/H2-Ab1/Igf2
GO:0072523	purine-containing compound catabolic process	129	0.513956	1.5932	0.000788152	0.000788152	0.0198336	1379	tags=19%, list=9%, signal=18%	Aldoc/Pgk1/Pkm/Aldoa/Tpi1/Ampd3/Pfkl/Pgam1/Nupr1/Eno1/Gapdh/Myc/Pfkp/Gpi1/Hif1a/Itpa/Galk1/Dnph1/Eif6/Nudt3/Acot7/Hdac4/Hk3/Htr2a/Xdh
GO:0009166	nucleotide catabolic process	141	0.524235	1.62641	0.000799366	0.000799366	0.0200172	1379	tags=20%, list=9%, signal=18%	Aldoc/Pgk1/Pkm/Aldoa/Tpi1/Ampd3/Pfkl/Pgam1/Nupr1/Eno1/Gapdh/Myc/Vcp/Pfkp/Dera/Dut/Gpi1/Hif1a/Itpa/Galk1/Dnph1/Eif6/Nudt3/Acot7/Hdac4/Hk3/Htr2a/Xdh
GO:0002428	antigen processing and presentation of peptide antigen via MHC class Ib	18	-0.867153	-1.76506	0.000803729	0.000803729	0.0200282	1127	tags=67%, list=8%, signal=62%	H2-Q10/H2-T24/Tap2/B2m/H2-K1/H2-D1/H2-M3/H2-T22/H2-Q4/H2-Q6/H2-Q7/H2-T23
GO:0002504	antigen processing and presentation of peptide or polysaccharide antigen via MHC class II	24	-0.839513	-1.79594	0.000811927	0.000811927	0.0200498	876	tags=46%, list=6%, signal=43%	Ctss/B2m/Fcgr2b/Unc93b1/Thbs1/H2-DMa/Cd74/H2-Eb1/H2-DMb1/H2-Aa/H2-Ab1
GO:0031333	negative regulation of protein-containing complex assembly	144	-0.608783	-1.66042	0.000812444	0.000812444	0.0200498	464	tags=17%, list=3%, signal=16%	Mefv/Trim11/Ulk1/Sptbn1/Ep300/Thra/Ssh2/Sorl1/Evl/Igtp/Irgm2/Ifi204/Svil/Trim30a/Ifi203/Mndal/Irgm1/Ifi211/Ifi209/Xaf1/Pecam1/Ifi206/Ifi213/Cdh5
GO:0006096	glycolytic process	84	0.582246	1.69451	0.000821835	0.000821835	0.0201179	803	tags=18%, list=5%, signal=17%	Aldoc/Pgk1/Pkm/Aldoa/Tpi1/Pfkl/Pgam1/Nupr1/Eno1/Gapdh/Myc/Pfkp/Gpi1/Hif1a/Galk1
GO:0002449	lymphocyte mediated immunity	245	-0.550196	-1.58565	0.000823082	0.000823082	0.0201179	630	tags=17%, list=4%, signal=17%	Myd88/B2m/Stat5b/Dusp22/Fcgr3/Il4ra/Bcl6/Ctsh/Dennd1b/H2-K1/Pou2f2/H2-D1/Fcgr2b/Csf3r/Serping1/Tap1/Csf2rb/C1ra/Fosl2/Icosl/Unc93b1/Fgl2/H2-M3/Bcl3/H2-T22/Arid5a/Fcgr1/H2-Q4/H2-Q6/Cd28/Ccr2/H2-Q7/Fcgr4/Batf/H2-T23/H2-DMa/Cd74/Ighm/Irf7/H2-Ab1/C1s1/Igf2
GO:0072234	metanephric nephron tubule development	10	-0.913308	-1.72823	0.000828201	0.000828201	0.0201467	304	tags=30%, list=2%, signal=29%	Wwtr1/Hes1/Aqp1
GO:0006412	translation	571	0.368666	1.33908	0.000844634	0.000844634	0.0203691	2542	tags=32%, list=17%, signal=27%	Pkm/Tnf/Ptrh1/Ppp1r15a/Cpeb4/Gapdh/Mrpl41/Gspt1/Mrps6/Nat10/Larp4/Mrps28/Eif3b/Mrpl20/Mrpl54/Ncbp2/Syncrip/Calr/Mrpl12/Dapk1/Lrpprc/Dhx29/Mrpl51/Per2/Mrps12/Eif3a/Abce1/Dnajc3/Eif4g2/Srp9/Mrpl14/Mrps10/Eif4ebp1/Usp16/Gadd45gip1/Mrps14/C1qbp/Caprin2/Eif2s1/Eif4g1/Mrpl34/Eif5a/Uqcc2/Mrpl57/Mrpl43/Aurkaip1/Mrps15/Dap3/Coa3/Usp10/Ncl/Mrpl18/Ybx1/Mrps26/Caprin1/Mrps34/Hnrnpd/Eif4e2/Rpl13/Rwdd1/Bzw1/Cy…
GO:0002443	leukocyte mediated immunity	323	-0.513883	-1.52293	0.00084532	0.00084532	0.0203691	1448	tags=23%, list=10%, signal=21%	P2rx7/Tnfrsf1b/C2/H2-Q10/Clec2d/Slc11a1/Spon2/Kdelr1/Cd40/Zbtb1/Vamp2/Syk/Ticam2/Sash3/H2-T24/C1qc/Kmt5c/Cx3cr1/Cebpg/Ndst2/Lgals9/Kmt2e/Il21r/Tap2/Myd88/B2m/Stat5b/Dusp22/Rac2/Fcgr3/Il4ra/Bcl6/Ctsh/Dennd1b/H2-K1/Pou2f2/H2-D1/Fcgr2b/Csf3r/Serping1/Bst2/Tap1/Csf2rb/C1ra/Fosl2/Icosl/Unc93b1/Cd300lb/Fgl2/Ptafr/H2-M3/Bcl3/H2-T22/Arid5a/Cd300a/Fcgr1/H2-Q4/H2-Q6/Cd28/Ccr2/H2-Q7/Fcgr4/Batf/H2-T23/H2-DMa…
GO:0007178	transmembrane receptor protein serine/threonine kinase signaling pathway	282	-0.527044	-1.54105	0.000857655	0.000857655	0.0205693	1230	tags=19%, list=8%, signal=18%	Htra3/Pparg/Tnrc6c/Flcn/Smpd3/Fut8/Gdf3/Fermt2/Pxn/Zyx/Lgals9/Lpxn/Tgfbr2/Sptbn1/Tgif1/Gcnt2/Arid4a/Pdcd4/Eng/Ep300/Stat3/Myd88/Gpr155/Rbpms/Acvrl1/Numa1/Dusp22/Sorl1/Map3k1/Bambi/Notch2/Fos/Nrros/Notch1/Tcf7l2/Cdkn1c/Wwtr1/Pml/Kdr/Gdf15/Zeb1/Hes1/Thbs1/Nfia/Nbl1/Tgfbr3/Peg10/Hpgd/Ltbp4/Cav1/Rgma/Nrep/Cldn5/Cdh5
GO:0007005	mitochondrion organization	476	0.383837	1.36195	0.000866417	0.000866417	0.0206823	2790	tags=32%, list=19%, signal=27%	Edn1/Bnip3/Bbc3/Plec/Fam162a/Spire1/Rala/Higd1a/Chchd6/Gclm/Lmna/Myc/Timm13/Cd24a/Chchd4/Prelid1/Ndufab1/Rab32/Park7/Hsp90aa1/Adgrg6/Vat1/Hspd1/Dynll1/Pdcd5/Sod2/Chchd7/Immt/Ndufb8/Dnm1l/Coq7/Timm10/Ndufb9/Hspa4/Kif5b/Vps35/Dnajc11/Hif1a/Ndufb10/Tomm40/Lonp1/Ndufb6/Ndufs5/Uqcc2/Bcl2l1/Rrm1/Tmem126a/Ndufc1/Dap3/Coa3/Bax/Atp7a/Inf2/Gclc/Ndufa8/Smurf1/Stoml2/Bak1/Fxn/Tomm70a/Spg7/Ndufs8/Slc25a4/Afg3…
GO:0019883	antigen processing and presentation of endogenous antigen	23	-0.829136	-1.74455	0.00087114	0.00087114	0.0206984	829	tags=57%, list=6%, signal=53%	H2-Q10/H2-T24/Tap2/B2m/H2-K1/H2-D1/Tap1/H2-M3/H2-T22/H2-Q4/H2-Q6/H2-Q7/H2-T23
GO:0002218	activation of innate immune response	267	-0.527461	-1.53365	0.000875665	0.000875665	0.0207096	1399	tags=23%, list=9%, signal=21%	Gramd4/Itch/Tifa/Ifi214/Oas1a/Rab11fip2/Sec14l1/Matr3/Cd274/Syk/Ticam2/Pum2/Nr1d1/Mefv/Trim11/Nmi/Dab2ip/Gbp7/Pcbp2/Ifi35/Casp6/Eif2ak2/Cgas/Trim25/Tlr7/Cd14/Myd88/Znfx1/Trim12a/Irak2/Irf2/Gbp3/Trim12c/Dhx58/Igtp/Tlr1/Irgm2/Ly96/Ifi204/Unc93b1/Trim30a/Gbp2/Irf1/Cd300a/Trim30d/Ifi203/Ddx60/Tifab/Mndal/Irgm1/Tlr12/Ifi211/Scimp/Ifi209/Zbp1/Oas1g/Cav1/Irf7/Oas3/Ifi206/Ifi213
GO:0006261	DNA-templated DNA replication	139	0.525299	1.61781	0.000884072	0.000884072	0.020812	2220	tags=27%, list=15%, signal=23%	Zranb3/Mcm5/Mcm2/Tk1/Mcm3/Nbn/Mcm7/Pcna/Rfc4/Mcm4/Baz1a/Lig1/Orc2/Mcm6/Nucks1/Rrm1/Cdt1/Cenpx/Cenps/Pole3/Gins2/Pola1/Pold3/Fancm/Topbp1/Blm/Tipin/Mcm10/Rbbp8/Atg7/Prim1/Lig3/Rrm2b/Rfc3/Rfc5/Orc4/Parp1
GO:0048871	multicellular organismal-level homeostasis	692	-0.448038	-1.39317	0.000891335	0.000891335	0.0208868	1653	tags=19%, list=11%, signal=18%	Lmo1/Prcp/Tjp1/Bbs4/Ppard/Rbfox2/Inpp5k/Fmo1/Ireb2/Plekhm1/Enpp1/Kitl/Tlr4/Xkr8/Maea/Slc25a40/Vps54/Tnfrsf17/Mir142hg/P2rx7/Zfp36l1/Slc11a1/Sp3/Zfp516/Ltbp3/Bmi1/Oas1a/Ip6k1/Nox4/Kmt2a/Pknox1/Dnase2a/Nr1h2/Pparg/Flcn/Ezh1/Syk/Flt3l/Tspan9/Il15/Sash3/Nr1d1/Sod1/Cx3cr1/Cebpg/Gdf3/P2ry14/Atxn2/Casp3/Lama4/Lmo2/Myct1/Kmt2e/Fbxl5/Ctss/Dram2/Il10ra/Gcnt2/Sh2b3/Col14a1/Egfr/Arid4a/Ikzf1/Idua/Ptgs1/Csf1r…
GO:0032753	positive regulation of interleukin-4 production	28	-0.80278	-1.75456	0.000900864	0.000900864	0.0209414	447	tags=50%, list=3%, signal=49%	H2-Q10/Syk/Sash3/Cebpb/Rara/H2-K1/H2-D1/Icosl/H2-T22/H2-Q4/H2-Q6/Cd28/H2-Q7/H2-T23
GO:0048284	organelle fusion	138	0.520754	1.60133	0.000901867	0.000901867	0.0209414	1971	tags=28%, list=13%, signal=25%	Bnip3/Stx11/Diaph3/Eea1/Anxa1/Stx3/Uso1/Erc1/Vat1/Rab8b/Dnm1l/Chmp2b/Arl8b/Kif5b/Stx4a/Gnai3/Syt11/Stx8/Rab34/Bax/Stoml2/Bak1/Tom1/Afg3l1/Rab7/Vamp7/Coro1a/Sec22b/Tbc1d4/Tfrc/Rcc1l/Chmp6/Cav2/Afg3l2/Vti1b/Mff/Vav3/Mul1/Chchd3
GO:0035740	CD8-positive, alpha-beta T cell proliferation	17	-0.872925	-1.75849	0.000913395	0.000913395	0.0210966	407	tags=47%, list=3%, signal=46%	H2-K1/H2-D1/H2-T22/Irf1/H2-Q4/H2-Q6/H2-Q7/H2-T23
GO:0070830	bicellular tight junction assembly	49	-0.743539	-1.75213	0.000916807	0.000916807	0.0210966	592	tags=14%, list=4%, signal=14%	Acvrl1/F11r/Pecam1/Ramp2/Esam/Cldn5/Cdh5
GO:0043010	camera-type eye development	261	-0.533735	-1.54599	0.000925159	0.000925159	0.0211933	895	tags=12%, list=6%, signal=11%	Tgfbr2/Tgif1/Arid1a/Egfr/Ikzf1/Maf/Stat3/Acvrl1/Sox4/Ctns/Cdkn1b/Map3k1/Rara/Notch2/Lrp5/Vegfa/Notch1/Mertk/Cdkn1c/Kdr/Zeb1/Hes1/Rpgrip1/Nfia/Pdgfrb/Pdgfra/Nfib/Gas1/Col4a1/Flt1/Aqp1
GO:0072655	establishment of protein localization to mitochondrion	88	0.576703	1.68909	0.000933602	0.000933602	0.0212912	1953	tags=35%, list=13%, signal=31%	Bbc3/Rala/Timm13/Chchd4/Bag3/Hsp90aa1/Hspd1/Pdcd5/Timm10/Timm8a1/Hspa4/Tomm40/Timm17a/Pmpca/Bax/Tomm70a/Dnlz/Timm17b/Pam16/Timm23/Grpel1/Samm50/Dnajc19/Hk1/Timm22/Tomm20/Cox18/Tspo/Maip1/Mff/Sh3glb1
GO:0001787	natural killer cell proliferation	24	-0.83764	-1.79193	0.00094305	0.00094305	0.0213923	1404	tags=50%, list=10%, signal=45%	H2-Q10/Flt3l/Il15/Elf4/Stat5b/H2-K1/H2-D1/H2-T22/H2-Q4/H2-Q6/H2-Q7/H2-T23
GO:0002252	immune effector process	512	-0.472009	-1.44369	0.00094641	0.00094641	0.0213923	1448	tags=21%, list=10%, signal=20%	P2rx7/Lbp/Tnfrsf1b/C2/H2-Q10/Cd37/Laptm5/Clec2d/Slc11a1/Cybc1/Spon2/Kdelr1/Itm2a/Kmt2a/Mfng/Cd40/Zbtb1/Vamp2/Syk/Ticam2/Sash3/H2-T24/C1qc/Kmt5c/Cx3cr1/Cebpg/Il6ra/Nmi/Litaf/Ndst2/Lgals9/Irf5/Cd47/Kmt2e/Il21r/Ifi35/Tap2/Cgas/Tlr7/Zbtb7b/Stat3/Myd88/Nfkbid/B2m/Stat5b/Dusp22/Rac2/Fcgr3/Il4ra/Bcl6/Ctsh/Hlx/Dennd1b/Cfb/Cebpb/Dhx58/Ly9/Rara/H2-K1/Pou2f2/Notch2/H2-D1/Sema4a/Fcgr2b/Csf3r/Serping1/Bst2/Ta…
GO:0072210	metanephric nephron development	23	-0.826628	-1.73927	0.000955714	0.000955714	0.0215074	244	tags=22%, list=2%, signal=21%	Hes1/Pdgfrb/Pdgfra/Aqp1/Agtr2
GO:0019682	glyceraldehyde-3-phosphate metabolic process	17	0.82116	1.77231	0.000966249	0.000966249	0.0216491	1430	tags=53%, list=10%, signal=48%	Pgk1/Tpi1/Pgam1/Eno1/Gapdh/Tkt/Mdh2/Taldo1/Rpe
GO:0009206	purine ribonucleoside triphosphate biosynthetic process	78	0.604034	1.74488	0.00100328	0.00100328	0.0223806	1818	tags=36%, list=12%, signal=32%	Aldoa/Eno1/Myc/Nme1/Vcp/Ndufab1/Nme2/Ndufb8/Ndufb9/Ndufb10/Impdh1/Ndufb6/Ndufs5/Bcl2l1/Ndufc1/Ndufa8/Stoml2/Ndufs8/Nudt2/Ndufs7/Ndufb7/Ndufv2/Ndufs6/Slc25a13/Ndufb2/Ndufb5/Ndufs1/Ndufb11
GO:0060996	dendritic spine development	119	0.527165	1.60895	0.00102194	0.00102194	0.0226977	1196	tags=15%, list=8%, signal=14%	Cdk5r1/Arc/Lrp8/Plk2/Baiap2/Pdlim5/Spire1/Dnm1l/Asap1/Dock10/Llph/Eif4g2/Caprin2/Camk1/Caprin1/Dbnl/Cfl1/Pafah1b1
GO:0006195	purine nucleotide catabolic process	124	0.521478	1.59606	0.00102843	0.00102843	0.0227432	1379	tags=20%, list=9%, signal=18%	Aldoc/Pgk1/Pkm/Aldoa/Tpi1/Ampd3/Pfkl/Pgam1/Nupr1/Eno1/Gapdh/Myc/Pfkp/Gpi1/Hif1a/Itpa/Galk1/Dnph1/Eif6/Nudt3/Acot7/Hdac4/Hk3/Htr2a/Xdh
GO:0018105	peptidyl-serine phosphorylation	241	0.433399	1.44044	0.00103756	0.00103756	0.0228461	1704	tags=19%, list=12%, signal=17%	Ifnb1/Cdk5r1/Dyrk3/Tnf/Plk2/Mif/Atp2b4/Ppp1r15a/Gadd45a/Ercc6/Smad7/Fnip2/Txn1/Stk38l/Park7/Cab39/Ripk2/Eif4g1/Camk1/Rps6ka2/Bax/Cd44/Akap9/Bak1/Top1/Nek6/Mark2/Pdk3/Srpk2/Csnk2a2/Pde4d/Clspn/Tlk1/Mast2/Gsk3b/Srpk1/Dyrk1a/Hipk3/Sgk1/Tfrc/Rock2/App/Mapkapk2/Mastl/Bcl2/Rps6kb1
GO:0008380	RNA splicing	398	0.395382	1.38361	0.00105095	0.00105095	0.0230416	3258	tags=37%, list=22%, signal=30%	Snrpa1/Lsm4/Lgals3/Txnl4a/Pik3r1/Snrnp25/Rest/Ncbp2/Cdk12/Syncrip/Ppp4r2/Ddx1/Srsf3/Sfpq/Hnrnpa2b1/C1qbp/Ahnak/Zcrb1/Fam50a/Srsf2/Gcfc2/Snrnp70/Ccnl1/Ncl/Ybx1/Prdx6/Srsf1/Jmjd6/Snrpd1/Thoc6/Hnrnpul2/Cwc15/Srsf10/Eny2/Rbm4/Ddx41/Prpf40a/Srek1/Sde2/Prpf39/Mbnl2/Srpk2/Dhx9/Hnrnph2/Dhx15/Srsf7/Sf3b3/Fus/Rbm39/Snrpa/Strap/Ppil1/Taf12/Srpk1/Dyrk1a/Puf60/Ddx23/Lsm2/Rbm14/Smn1/Lsm1/Npm1/Fastk/Ddx46/Tardb…
GO:0009145	purine nucleoside triphosphate biosynthetic process	79	0.600656	1.72987	0.00106477	0.00106477	0.0231583	3174	tags=53%, list=22%, signal=42%	Aldoa/Eno1/Myc/Nme1/Vcp/Ndufab1/Nme2/Ndufb8/Ndufb9/Ndufb10/Impdh1/Ndufb6/Ndufs5/Bcl2l1/Ndufc1/Ndufa8/Stoml2/Ndufs8/Nudt2/Ndufs7/Ndufb7/Ndufv2/Ndufs6/Slc25a13/Ndufb2/Ndufb5/Ndufs1/Ndufb11/Ndufs4/Parp1/Nme6/Ndufc2/Sdhc/Ndufv3/Ndufa11/Eno1b/Ndufa9/Ndufa10/Ndufb3/Ndufa12/Ndufa1/Adk
GO:0001654	eye development	295	-0.521695	-1.53542	0.00106941	0.00106941	0.0231583	1184	tags=13%, list=8%, signal=12%	Nrp1/Rarg/Gdf3/Pbx2/Rhoj/Tgfbr2/Tgif1/Arid1a/Egfr/Casp6/Ikzf1/Maf/Stat3/Acvrl1/Mfap2/Sox4/Ctns/Cdkn1b/Map3k1/Pbx1/Rara/Notch2/Lrp5/Vegfa/Notch1/Mertk/Cdkn1c/Kdr/Zeb1/Hes1/Rpgrip1/Nfia/Pdgfrb/Pdgfra/Nfib/Gas1/Col4a1/Flt1/Aqp1
GO:0002521	leukocyte differentiation	577	-0.46424	-1.43355	0.00106987	0.00106987	0.0231583	1425	tags=19%, list=10%, signal=18%	Gab3/Zfp36l1/Lbr/Laptm5/Clec2d/Sp3/Smarcc2/Bmi1/Ifi214/Kdelr1/Itm2a/Nfatc1/Kmt2a/Mfng/Pknox1/Pparg/Zbtb1/Syk/Fzd7/Flt3l/Il15/Tmem176a/Sash3/C1qc/Cebpg/Il6ra/Lgals9/Cebpa/Casp8/Tgfbr2/Tob2/Zfp36l2/Arid1a/Klf10/Sh2b3/Ikzf1/Ifnar2/Hhex/Csf1r/Fbxo7/Wwp1/Ep300/Evi2/Mef2c/Nfam1/Ucp2/Zbtb7b/Stat3/Myd88/Nfkbid/B2m/Trib1/Nedd9/Cd79b/Stat5b/Sox4/Tmem176b/Il4ra/Bcl6/Hlx/Cebpb/Pbx1/Junb/Ly9/Igtp/Rara/Pou2f2/…
GO:0001936	regulation of endothelial cell proliferation	125	-0.617035	-1.65111	0.00108461	0.00108461	0.0233783	767	tags=18%, list=5%, signal=17%	Ang/Eng/Mef2c/Stat3/Acvrl1/Ccl24/Hspg2/Nr4a1/Pik3cd/Vegfa/Kdr/Col18a1/Thbs1/Stat1/Apoe/Cxcl12/Flt1/Cav1/Igf2/Egfl7/Aplnr/Dlk1
GO:0042270	protection from natural killer cell mediated cytotoxicity	13	-0.893014	-1.72801	0.0011089	0.0011089	0.0238014	1404	tags=85%, list=10%, signal=77%	H2-Q10/Clec2d/Tap2/H2-K1/H2-D1/Tap1/H2-T22/H2-Q4/H2-Q6/H2-Q7/H2-T23
GO:0072526	pyridine-containing compound catabolic process	94	0.565447	1.67561	0.00113382	0.00113382	0.0239541	803	tags=16%, list=5%, signal=15%	Aldoc/Pgk1/Pkm/Aldoa/Tpi1/Pfkl/Pgam1/Nupr1/Eno1/Gapdh/Myc/Pfkp/Gpi1/Hif1a/Galk1
GO:0002716	negative regulation of natural killer cell mediated immunity	25	-0.822444	-1.77548	0.00113994	0.00113994	0.0239541	985	tags=52%, list=7%, signal=49%	H2-Q10/Clec2d/Lgals9/Tap2/H2-K1/H2-D1/Tap1/H2-T22/H2-Q4/H2-Q6/H2-Q7/H2-T23/Igf2
GO:0045953	negative regulation of natural killer cell mediated cytotoxicity	25	-0.822444	-1.77548	0.00113994	0.00113994	0.0239541	985	tags=52%, list=7%, signal=49%	H2-Q10/Clec2d/Lgals9/Tap2/H2-K1/H2-D1/Tap1/H2-T22/H2-Q4/H2-Q6/H2-Q7/H2-T23/Igf2
GO:0050863	regulation of T cell activation	327	-0.508827	-1.50993	0.00114459	0.00114459	0.0239541	895	tags=17%, list=6%, signal=16%	Tgfbr2/Arid1a/Sh2b3/Sirpb1a/Tnfrsf21/Tnfaip8l2/Cgas/Zbtb7b/Nfkbid/B2m/Stat5b/Dusp22/Sox4/Rac2/Il4ra/Bcl6/Hlx/Csk/Il6st/Cebpb/Rara/H2-K1/H2-D1/Pla2g2d/Icosl/Fgl2/Cd83/H2-T22/Zeb1/Hes1/Rhoh/Irf1/Gm5150/Cd300a/Card11/Sirpb1c/H2-Q4/H2-Q6/Cd28/Ccr2/H2-Q7/Irgm1/Sirpb1b/H2-T23/H2-DMa/Cd74/H2-Eb1/H2-DMb1/H2-Aa/Cav1/Slfn1/H2-Ab1/Clec2i/Igf2
GO:0010720	positive regulation of cell development	456	-0.47563	-1.44193	0.00114621	0.00114621	0.0239541	1270	tags=14%, list=9%, signal=13%	Sema4d/Sema5a/Pparg/Zbtb1/Nrp1/Syk/Flt3l/Il15/Sash3/Cx3cr1/S1pr2/Serpine2/Lgals9/Casp8/Eef2k/Tgfbr2/Arid1a/Klf10/Egfr/Ikzf1/Csf1r/Ep300/Evi2/Jade2/Zbtb7b/Nfkbid/Trib1/Nedd9/Stat5b/Sox4/Synj1/Il4ra/Bcl6/F11r/Hlx/Il6st/Marcks/Rara/Notch2/Vegfa/Fos/Notch1/Cd83/Kdr/Hes1/Rhoh/Cxcr4/Irf1/Trf/Ccr2/Ptprd/Axl/H2-DMa/Apoe/Cd74/Cxcl12/Ace/H2-Aa/Flt1/Chodl/Cldn5/Cdh5/Dlk1
GO:0045446	endothelial cell differentiation	104	-0.638854	-1.66485	0.00114772	0.00114772	0.0239541	630	tags=16%, list=4%, signal=16%	Myd88/Acvrl1/Tnfrsf1a/F11r/Btg1/Foxj2/Hpse/Vegfa/Notch1/Kdr/Col18a1/Zeb1/Cxcr4/Pecam1/Cldn5/Sox18/Cdh5
GO:0051656	establishment of organelle localization	405	0.395285	1.38403	0.00116163	0.00116163	0.0239541	2644	tags=26%, list=18%, signal=22%	Map4k2/Rrs1/Spire1/Tuba1a/Hmox1/Sirt1/Lmna/Gem/Syne1/Exoc5/Ran/Sdc4/Trappc6a/Cep83/Dynll1/Spdl1/Ykt6/Myh9/Dnm1l/Nup62/Spc24/Ttl/Ezr/Chmp2b/Myo7a/Ccdc186/Abce1/Kif5b/Pinx1/Arhgap21/Bicd2/Fbxw11/Hif1a/Arfgap2/Itgb1/Hsbp1/Cdt1/Syt11/Hook3/Lat2/Mapre1/Birc5/Dnm2/Exoc6b/Eif6/Fhod1/Cfl1/Pdcd6ip/Steap3/Rab7/Pafah1b1/Scrib/Vamp7/Cdk5rap2/Trip11/Trappc4/Zwint/Rab11a/Spast/Sar1a/Trappc10/Mad2l1/Naglu/Npm1/…
GO:0019364	pyridine nucleotide catabolic process	90	0.570647	1.67887	0.00116286	0.00116286	0.0239541	803	tags=17%, list=5%, signal=16%	Aldoc/Pgk1/Pkm/Aldoa/Tpi1/Pfkl/Pgam1/Nupr1/Eno1/Gapdh/Myc/Pfkp/Gpi1/Hif1a/Galk1
GO:0007339	binding of sperm to zona pellucida	22	0.777091	1.7992	0.00116341	0.00116341	0.0239541	1942	tags=41%, list=13%, signal=36%	Aldoa/Cct3/Cct6a/Cct2/Tcp1/Cct8/Cct7/Vdac2/Cct5
GO:0007098	centrosome cycle	127	0.522569	1.616	0.00116478	0.00116478	0.0239541	3106	tags=32%, list=21%, signal=26%	Ccnf/Plk2/Gadd45a/Tuba1a/Sirt1/Nat10/Ranbp1/Nup62/Chmp2b/Ccnl1/Ssx2ip/Azin1/Pdcd6ip/Cdk5rap2/Cep250/Npm1/Dync1li1/Rock2/Nin/Kif3a/Xpo1/Pde4dip/Chmp2a/Sac3d1/Nubp1/Ppp1r35/Uxt/Stil/Nsfl1c/Cetn2/Haus1/Cdk11b/Chek1/Uvrag/Cep131/Pclaf/Dctn1/Atf5/Cetn4/Cep295nl/Ctnnb1
GO:0006720	isoprenoid metabolic process	62	0.62439	1.72196	0.00117418	0.00117418	0.0239541	616	tags=15%, list=4%, signal=14%	Fdps/Idi1/Dhrs9/Mvd/Hmgcs1/Pmvk/Nus1/Adh5/Fdft1
GO:0071772	response to BMP	113	-0.623585	-1.64295	0.00117698	0.00117698	0.0239541	740	tags=18%, list=5%, signal=17%	Pdcd4/Eng/Gpr155/Acvrl1/Numa1/Sorl1/Bambi/Notch2/Notch1/Tcf7l2/Kdr/Hes1/Nfia/Nbl1/Tgfbr3/Adamts12/Cav1/Rgma/Heyl/Cdh5
GO:0071773	cellular response to BMP stimulus	113	-0.623585	-1.64295	0.00117698	0.00117698	0.0239541	740	tags=18%, list=5%, signal=17%	Pdcd4/Eng/Gpr155/Acvrl1/Numa1/Sorl1/Bambi/Notch2/Notch1/Tcf7l2/Kdr/Hes1/Nfia/Nbl1/Tgfbr3/Adamts12/Cav1/Rgma/Heyl/Cdh5
GO:0032392	DNA geometric change	48	0.677989	1.79308	0.00121241	0.00121241	0.0245773	1198	tags=29%, list=8%, signal=27%	Zranb3/Mcm5/Anxa1/Mcm2/Mcm3/Nbn/Mcm7/Mcm4/Ddx1/Hnrnpa2b1/Mcm6/Gins2/Ascc3/Dhx9
GO:0007059	chromosome segregation	361	0.396753	1.36276	0.0012631	0.0012631	0.0254093	2973	tags=29%, list=20%, signal=24%	Diaph3/Rrs1/Mki67/Sirt1/Uhrf1/Gem/Ran/Kif2a/Spdl1/Nup62/Spc24/Ttl/Chmp2b/Arl8b/Pinx1/Ncapg2/Smarca4/Cdt1/Actl6a/Cenpx/Cenps/Ccnb2/Mapre1/Birc5/Senp6/Top1/Nek6/Flna/Ciao2b/Ddb1/Csnk2a2/Smc3/Cdk5rap2/Tlk1/Gtf2b/Syce2/Anapc15/Dcaf13/Srpk1/Ciao2a/Zwint/Rab11a/Tpr/Mad2l1/Dync1li1/Espl1/Chmp6/Ncaph2/Ccsap/Rps3/Nsmce2/Kat5/Rangrf/Kif3b/Wapl/Pcid2/Ppp2r1a/Cdc42/Tubg1/Tacc3/Usp9x/Cul3/Smc2/Cdca8/Smc6/Bag6…
GO:0070665	positive regulation of leukocyte proliferation	149	-0.580281	-1.58944	0.0012675	0.0012675	0.0254093	1210	tags=23%, list=8%, signal=21%	Cd40/Cd274/Syk/Flt3l/Il15/Sash3/Tgfbr2/Csf1r/Mef2c/Myd88/Stat5b/Rac2/Bcl6/Cdkn1a/Il6st/H2-K1/H2-D1/Csf2rb/Icosl/H2-T22/Hes1/Card11/H2-Q4/H2-Q6/Cd28/Ccr2/H2-Q7/Irgm1/H2-T23/Cd74/H2-DMb1/Ighm/Cd38/Igf2
GO:0101023	vascular endothelial cell proliferation	25	-0.821191	-1.77277	0.00126929	0.00126929	0.0254093	666	tags=32%, list=5%, signal=31%	Pparg/Itga4/Mef2c/Stat3/Col18a1/Flt1/Igf2/Dlk1
GO:0006268	DNA unwinding involved in DNA replication	20	0.786873	1.7512	0.00127334	0.00127334	0.0254093	1532	tags=40%, list=10%, signal=36%	Mcm5/Mcm2/Mcm3/Mcm7/Mcm4/Mcm6/Gins2/Blm
GO:0009135	purine nucleoside diphosphate metabolic process	95	0.547266	1.62108	0.00128333	0.00128333	0.0254101	288	tags=14%, list=2%, signal=14%	Aldoc/Pgk1/Pkm/Aldoa/Tpi1/Ampd3/Pfkl/Pgam1/Nupr1/Eno1/Gapdh/Myc/Pfkp
GO:0009179	purine ribonucleoside diphosphate metabolic process	95	0.547266	1.62108	0.00128333	0.00128333	0.0254101	288	tags=14%, list=2%, signal=14%	Aldoc/Pgk1/Pkm/Aldoa/Tpi1/Ampd3/Pfkl/Pgam1/Nupr1/Eno1/Gapdh/Myc/Pfkp
GO:0061025	membrane fusion	126	0.510641	1.57215	0.00130828	0.00130828	0.025804	2403	tags=30%, list=16%, signal=25%	Ch25h/Stx11/Adam8/Diaph3/Eea1/Anxa1/Stx3/Uso1/Erc1/Rab8b/Dnm1l/Chmp2b/Arl8b/Kif5b/Stx4a/Gnai3/Syt11/Stx8/Cd9/Rab34/Anxa7/Tom1/Rab7/Vamp7/Coro1a/Sec22b/Tbc1d4/Chmp6/Vps33b/Cav2/Vti1b/Vav3/Myof/Snap47/Chmp2a/Rab12/Stx2/Pip4k2b
GO:0002519	natural killer cell tolerance induction	10	-0.902834	-1.70841	0.00135728	0.00135728	0.0260605	407	tags=80%, list=3%, signal=78%	H2-Q10/H2-K1/H2-D1/H2-T22/H2-Q4/H2-Q6/H2-Q7/H2-T23
GO:0034375	high-density lipoprotein particle remodeling	10	-0.902542	-1.70786	0.00135728	0.00135728	0.0260605	549	tags=40%, list=4%, signal=39%	Scarb1/Pltp/Abcg1/Apoe
GO:0031023	microtubule organizing center organization	138	0.510367	1.5694	0.00136397	0.00136397	0.0260605	3106	tags=32%, list=21%, signal=25%	Ccnf/Plk2/Gadd45a/Tuba1a/Sirt1/Nat10/Ranbp1/Nup62/Chmp2b/Fbxw11/Ccnl1/Ssx2ip/Azin1/Pdcd6ip/Pafah1b1/Cdk5rap2/Cep250/Rbm14/Npm1/Dync1li1/Rock2/Nin/Kif3a/Xpo1/Pde4dip/Chmp2a/Sac3d1/Nubp1/Ppp1r35/Uxt/Stil/Nsfl1c/Cetn2/Haus1/Cdk11b/Chek1/Uvrag/Cep131/Pclaf/Dctn1/Atf5/Cetn4/Cep295nl/Ctnnb1
GO:0006694	steroid biosynthetic process	108	0.542042	1.63177	0.00136707	0.00136707	0.0260605	627	tags=22%, list=4%, signal=21%	Dhcr24/Sqle/Fdps/Idi1/Ch25h/Cyp51/Tnf/Msmo1/Mvd/Wnt4/Sirt1/Srebf2/Hmgcs1/Hsd17b12/Pmvk/Rest/Acbd3/Atp1a1/Stard4/Insig1/Nfkb1/Cyb5r3/Fdft1/Fdx1
GO:0000375	RNA splicing, via transesterification reactions	258	0.422816	1.42539	0.00136845	0.00136845	0.0260605	3363	tags=41%, list=23%, signal=32%	Snrpa1/Lsm4/Txnl4a/Snrnp25/Rest/Ncbp2/Srsf3/Sfpq/Hnrnpa2b1/C1qbp/Zcrb1/Srsf2/Gcfc2/Snrnp70/Ncl/Prdx6/Srsf1/Jmjd6/Snrpd1/Hnrnpul2/Cwc15/Srsf10/Rbm4/Ddx41/Prpf40a/Sde2/Prpf39/Mbnl2/Srpk2/Dhx9/Srsf7/Sf3b3/Rbm39/Snrpa/Strap/Ppil1/Srpk1/Dyrk1a/Puf60/Ddx23/Lsm2/Rbm14/Smn1/Npm1/Ddx46/Sf3b5/Rbm10/Lsm6/Snrpb/Rbmx/Rbmx2/Hnrnpa3/Aar2/Snrpd3/U2af2/Hnrnpm/Eftud2/Hspa8/Sf3b2/Scaf11/Wdr83/Thrap3/Ncbp1/Prpf31/Yj…
GO:0000377	RNA splicing, via transesterification reactions with bulged adenosine as nucleophile	258	0.422816	1.42539	0.00136845	0.00136845	0.0260605	3363	tags=41%, list=23%, signal=32%	Snrpa1/Lsm4/Txnl4a/Snrnp25/Rest/Ncbp2/Srsf3/Sfpq/Hnrnpa2b1/C1qbp/Zcrb1/Srsf2/Gcfc2/Snrnp70/Ncl/Prdx6/Srsf1/Jmjd6/Snrpd1/Hnrnpul2/Cwc15/Srsf10/Rbm4/Ddx41/Prpf40a/Sde2/Prpf39/Mbnl2/Srpk2/Dhx9/Srsf7/Sf3b3/Rbm39/Snrpa/Strap/Ppil1/Srpk1/Dyrk1a/Puf60/Ddx23/Lsm2/Rbm14/Smn1/Npm1/Ddx46/Sf3b5/Rbm10/Lsm6/Snrpb/Rbmx/Rbmx2/Hnrnpa3/Aar2/Snrpd3/U2af2/Hnrnpm/Eftud2/Hspa8/Sf3b2/Scaf11/Wdr83/Thrap3/Ncbp1/Prpf31/Yj…
GO:0000398	mRNA splicing, via spliceosome	258	0.422816	1.42539	0.00136845	0.00136845	0.0260605	3363	tags=41%, list=23%, signal=32%	Snrpa1/Lsm4/Txnl4a/Snrnp25/Rest/Ncbp2/Srsf3/Sfpq/Hnrnpa2b1/C1qbp/Zcrb1/Srsf2/Gcfc2/Snrnp70/Ncl/Prdx6/Srsf1/Jmjd6/Snrpd1/Hnrnpul2/Cwc15/Srsf10/Rbm4/Ddx41/Prpf40a/Sde2/Prpf39/Mbnl2/Srpk2/Dhx9/Srsf7/Sf3b3/Rbm39/Snrpa/Strap/Ppil1/Srpk1/Dyrk1a/Puf60/Ddx23/Lsm2/Rbm14/Smn1/Npm1/Ddx46/Sf3b5/Rbm10/Lsm6/Snrpb/Rbmx/Rbmx2/Hnrnpa3/Aar2/Snrpd3/U2af2/Hnrnpm/Eftud2/Hspa8/Sf3b2/Scaf11/Wdr83/Thrap3/Ncbp1/Prpf31/Yj…
GO:1903039	positive regulation of leukocyte cell-cell adhesion	235	-0.537461	-1.53948	0.00137169	0.00137169	0.0260605	637	tags=21%, list=4%, signal=21%	Zbtb1/Cd274/Syk/Il15/Sash3/Itga4/Lgals9/Cd47/Tgfbr2/Arid1a/Sirpb1a/Zbtb7b/Nfkbid/B2m/Stat5b/Sox4/Il4ra/Bcl6/Hlx/Il6st/St3gal4/Rara/H2-K1/H2-D1/Icosl/Ptafr/Cd83/H2-T22/Hes1/Rhoh/Irf1/Gm5150/Card11/Sirpb1c/H2-Q4/H2-Q6/Cd28/Ccr2/H2-Q7/Irgm1/Sirpb1b/H2-T23/H2-DMa/Cd74/H2-Eb1/H2-DMb1/H2-Aa/Cav1/H2-Ab1/Igf2
GO:0050673	epithelial cell proliferation	393	-0.482012	-1.44727	0.00137363	0.00137363	0.0260605	1291	tags=15%, list=9%, signal=14%	Glul/Cdh13/Nfatc1/Sema5a/BC004004/Pparg/Flcn/Ednra/Fzd7/Ccl11/Kdm5b/Nr1d1/Itga4/Dab2ip/Stk4/Egfr/Ccnd2/Ang/Klf9/Eng/Mef2c/Stat3/B2m/Acvrl1/Scarb1/Ccl24/Cdkn1a/Cdkn1b/Hlx/Hspg2/Zfas1/Cebpb/Nr4a1/Notch2/Pik3cd/Vegfa/Zfp36/Notch1/Tcf7l2/Cdkn1c/Kdr/Col18a1/Zeb1/Hes1/Thbs1/Stat1/Tgfbr3/Apoe/Cxcl12/Nfib/Gas1/Flt1/Cav1/Lama5/Igf2/Egfl7/Cd34/Aplnr/Dlk1
GO:0009134	nucleoside diphosphate catabolic process	95	0.545183	1.61491	0.00137655	0.00137655	0.0260605	288	tags=14%, list=2%, signal=14%	Aldoc/Pgk1/Pkm/Aldoa/Tpi1/Ampd3/Pfkl/Pgam1/Nupr1/Eno1/Gapdh/Myc/Pfkp
GO:0045746	negative regulation of Notch signaling pathway	30	-0.802829	-1.75057	0.00137919	0.00137919	0.0260605	537	tags=13%, list=4%, signal=13%	Bcl6/Lfng/Egfl7/Dlk1
GO:0060284	regulation of cell development	780	-0.435602	-1.35901	0.0013825	0.0013825	0.0260605	1214	tags=14%, list=8%, signal=13%	Pparg/Zbtb1/Rflnb/Nrp1/Rarg/Syk/Ccl11/Flt3l/Il15/Tmem176a/Sash3/Nr1d1/C1qc/Cx3cr1/Trim11/S1pr2/Lmo2/Serpine2/Lgals9/Cebpa/Ulk1/Casp8/Eef2k/Ifrd1/Tgfbr2/Tob2/Sema6d/Zfp36l2/Arid1a/Klf10/Sh2b3/Egfr/Kat6a/Ikzf1/Sema6b/Ctdsp1/Csf1r/Fbxo7/Ep300/Dip2b/Evi2/Jade2/Mef2c/Nfam1/Zbtb7b/Stat3/Foxo3/Nfkbid/B2m/Trib1/Nedd9/Tnfrsf1a/Zcchc24/Stat5b/Sox4/Synj1/Tmem176b/Il4ra/Bcl6/F11r/Hlx/Il6st/Sorl1/Marcks/Cebpb…
GO:0060976	coronary vasculature development	64	-0.695239	-1.686	0.00140763	0.00140763	0.0263525	574	tags=12%, list=4%, signal=12%	Abcc9/Ndst1/Vegfa/Notch1/Tgfbr3/Pdgfrb/Ace/Aplnr
GO:0001916	positive regulation of T cell mediated cytotoxicity	30	-0.801587	-1.74786	0.00141108	0.00141108	0.0263525	1448	tags=43%, list=10%, signal=39%	P2rx7/H2-Q10/H2-T24/Tap2/B2m/H2-K1/H2-D1/H2-M3/H2-T22/H2-Q4/H2-Q6/H2-Q7/H2-T23
GO:1903829	positive regulation of protein localization	448	0.373634	1.31979	0.00142388	0.00142388	0.0263525	1953	tags=23%, list=13%, signal=21%	Cdk5r1/Edn1/Bbc3/Ccl2/Tnf/Atp2b4/Mmp13/Itgam/Kcnn4/Sirt1/Mdm2/Stx3/Ran/Lgals3/Cd81/Gpr137b/Pik3r1/Bag3/Park7/Hras/Hsp90aa1/Cct3/Dynll1/Pdcd5/Myh9/Dnm1l/Nup62/Cib1/Cct6a/Adam9/Hsp90ab1/Ezr/Slc5a3/Kif5b/Vps35/Gpr68/Ppia/Pinx1/Oaz1/Prkar1a/Cct2/Cep290/Hif1a/Stx4a/Eif4g1/Itgb1/Tcp1/Stac2/Syt11/Camk1/Rab34/Ywhae/Bsg/Anxa7/Anp32b/Rufy3/B3gat3/Tomm70a/Flna/Cfl1/Tmem97/Zdhhc5/Oga/Glud1/Plk3/Pik3ca/Epb41l…
GO:0006695	cholesterol biosynthetic process	41	0.671348	1.69977	0.00143106	0.00143106	0.0263525	813	tags=32%, list=6%, signal=30%	Dhcr24/Fdps/Idi1/Cyp51/Msmo1/Mvd/Srebf2/Hmgcs1/Pmvk/Insig1/Cyb5r3/Fdft1/Por
GO:1902653	secondary alcohol biosynthetic process	41	0.671348	1.69977	0.00143106	0.00143106	0.0263525	813	tags=32%, list=6%, signal=30%	Dhcr24/Fdps/Idi1/Cyp51/Msmo1/Mvd/Srebf2/Hmgcs1/Pmvk/Insig1/Cyb5r3/Fdft1/Por
GO:0009132	nucleoside diphosphate metabolic process	111	0.52867	1.60349	0.00143252	0.00143252	0.0263525	803	tags=16%, list=5%, signal=15%	Aldoc/Pgk1/Pkm/Aldoa/Tpi1/Ampd3/Pfkl/Pgam1/Nupr1/Eno1/Gapdh/Myc/Pfkp/Dtymk/Gpi1/Hif1a/Rrm1/Galk1
GO:0006754	ATP biosynthetic process	69	0.602871	1.69876	0.00144564	0.00144564	0.0263525	3142	tags=54%, list=21%, signal=42%	Aldoa/Eno1/Myc/Vcp/Ndufab1/Ndufb8/Ndufb9/Ndufb10/Ndufb6/Ndufs5/Bcl2l1/Ndufc1/Ndufa8/Stoml2/Ndufs8/Nudt2/Ndufs7/Ndufb7/Ndufv2/Ndufs6/Slc25a13/Ndufb2/Ndufb5/Ndufs1/Ndufb11/Ndufs4/Parp1/Ndufc2/Sdhc/Ndufv3/Ndufa11/Eno1b/Ndufa9/Ndufa10/Ndufb3/Ndufa12/Ndufa1
GO:0032819	positive regulation of natural killer cell proliferation	18	-0.857508	-1.74543	0.00144625	0.00144625	0.0263525	1404	tags=61%, list=10%, signal=55%	H2-Q10/Flt3l/Il15/Stat5b/H2-K1/H2-D1/H2-T22/H2-Q4/H2-Q6/H2-Q7/H2-T23
GO:0030522	intracellular receptor signaling pathway	301	-0.510247	-1.50289	0.00145046	0.00145046	0.0263525	1399	tags=20%, list=9%, signal=19%	Gramd4/Itch/Tifa/Nr2c1/Ifi214/Oas1a/Nr1h2/Sec14l1/Pparg/Rarg/Pum2/Trerf1/Mefv/Trim11/Pcbp2/Ncoa3/Per1/Tgif1/Arid1a/Pim1/Ncoa2/Eif2ak2/Cgas/Klf9/Peg13/Ep300/Thra/Trim25/Tlr7/Stat3/Myd88/Dhrs3/Irf2/Klf2/Daxx/Dhx58/Igtp/Rara/Irgm2/Ifi204/Unc93b1/Trim30a/Pml/Gbp2/Irf1/Lbh/Ifi203/Ddx60/Mndal/Irgm1/Ifi211/Scimp/Ifi209/Oas1g/Flt1/Cav1/Irf7/Oas3/Heyl/Ifi206/Ifi213
GO:0090287	regulation of cellular response to growth factor stimulus	263	-0.524931	-1.52215	0.00145347	0.00145347	0.0263525	808	tags=13%, list=5%, signal=12%	Arid4a/Hhex/Ptp4a3/Eng/Ep300/Gpr155/Acvrl1/Numa1/Dcn/Sorl1/Bambi/Notch2/Vegfa/Nrros/Notch1/Tcf7l2/Grb10/Cdkn1c/Kdr/Zeb1/Smoc2/Hes1/Thbs1/Nbl1/Tgfbr3/Peg10/Adamts12/Cav1/Rgma/Nrep/Spry4/Agtr2/Cdh5
GO:0022409	positive regulation of cell-cell adhesion	272	-0.526417	-1.53206	0.00145474	0.00145474	0.0263525	637	tags=21%, list=4%, signal=20%	Zbtb1/Cd274/Syk/Il15/Sash3/Itga4/Il6ra/Lgals9/Cd47/Tgfbr2/Arid1a/Gcnt2/Sirpb1a/Zbtb7b/Nfkbid/B2m/Stat5b/Sox4/Il4ra/Bcl6/F11r/Hlx/Il6st/St3gal4/Rara/H2-K1/H2-D1/Icosl/Adam19/Ptafr/Cd83/H2-T22/Hes1/Rhoh/Irf1/Gm5150/Ccr5/Card11/Sirpb1c/H2-Q4/H2-Q6/Cd28/Ccr2/H2-Q7/Irgm1/Sirpb1b/H2-T23/H2-DMa/Cd74/H2-Eb1/H2-DMb1/H2-Aa/Cav1/H2-Ab1/Igf2/Podxl
GO:0051604	protein maturation	425	0.384186	1.35128	0.00147102	0.00147102	0.0265534	1553	tags=26%, list=11%, signal=24%	Dhcr24/Pgk1/Ptges3l/Cpd/S100a10/Hsph1/Ppp1r15a/Eno1/Plau/Serpine1/Comp/Hspa5/F7/Mdm2/Hsp90b1/Myc/Fkbp2/Fkbp4/Naa50/Tbcb/Chchd4/Glrx5/Ndufab1/Capn2/Sec11c/Pdia4/Sdf2l1/Cln5/Adam17/Hspa9/Hsp90aa1/Galnt2/Hspd1/Cct3/Pdcd5/Gsn/Sgta/Myh9/Unc45a/Calr/Cct6a/Gcsh/Adam9/Hspa2/Dnajb4/Hsp90ab1/Bag1/Aph1b/Mvp/Canx/Hspa4/Vps35/Dnajc3/Bola3/Ppia/Dnajb11/Cct2/Ripk2/Pfdn6/Nlrp3/Dhps/Spcs3/Pdia3/Tcp1/Timm17a/Pmpca…
GO:0045664	regulation of neuron differentiation	157	-0.5887	-1.61495	0.00148306	0.00148306	0.0266764	1011	tags=14%, list=7%, signal=13%	Hmg20a/Tcf4/Tgif1/Ctdsp1/Mef2c/Foxo3/B2m/Bcl6/Pbx1/Rara/Dleu2/Notch1/Impact/Zeb1/Hes1/Ccr5/Nbl1/Cxcl12/Cav1/Notch3/Nrep/Heyl
GO:0002476	antigen processing and presentation of endogenous peptide antigen via MHC class Ib	17	-0.864866	-1.74225	0.00149386	0.00149386	0.0266827	1404	tags=65%, list=10%, signal=59%	H2-Q10/H2-T24/Tap2/H2-K1/H2-D1/H2-M3/H2-T22/H2-Q4/H2-Q6/H2-Q7/H2-T23
GO:0002484	antigen processing and presentation of endogenous peptide antigen via MHC class I via ER pathway	17	-0.864866	-1.74225	0.00149386	0.00149386	0.0266827	1404	tags=65%, list=10%, signal=59%	H2-Q10/H2-T24/Tap2/H2-K1/H2-D1/H2-M3/H2-T22/H2-Q4/H2-Q6/H2-Q7/H2-T23
GO:0043297	apical junction assembly	58	-0.703737	-1.69621	0.00150632	0.00150632	0.0268115	592	tags=12%, list=4%, signal=12%	Acvrl1/F11r/Pecam1/Ramp2/Esam/Cldn5/Cdh5
GO:0032814	regulation of natural killer cell activation	47	-0.735792	-1.71788	0.00152044	0.00152044	0.0269676	1206	tags=36%, list=8%, signal=33%	H2-Q10/Zbtb1/Ticam2/Flt3l/Il15/Lgals9/Stat5b/H2-K1/H2-D1/Slamf7/H2-T22/Irf1/H2-Q4/H2-Q6/H2-Q7/Axl/H2-T23
GO:0035458	cellular response to interferon-beta	50	-0.716381	-1.69721	0.001528	0.001528	0.0269676	508	tags=38%, list=3%, signal=37%	Gbp3/Gm5431/Igtp/Irgm2/Ifi204/Gbp2/Irf1/Stat1/Ifi203/Ifit3/Mndal/Irgm1/Ifi211/Ifi209/Ifi47/Iigp1/Oas1g/Ifi206/Ifi213
GO:0070661	leukocyte proliferation	317	-0.505961	-1.49323	0.00153363	0.00153363	0.0269676	1448	tags=21%, list=10%, signal=19%	P2rx7/Tnfrsf1b/H2-Q10/Cd37/Laptm5/Itch/Slc11a1/Mad1l1/Bmi1/Cd40/Cd274/Syk/Flt3l/Il15/Sash3/Casp3/Lgals9/Gstp1/Tgfbr2/Tnfrsf21/Ifnar2/Hhex/Csf1r/Elf4/Mef2c/Zbtb7b/Myd88/Stat5b/Rac2/Bcl6/Cdkn1a/Il6st/Cfb/Cebpb/Junb/H2-K1/H2-D1/Fcgr2b/Pla2g2d/Ebi3/Csf2rb/Fosl2/Icosl/Lst1/H2-T22/Hes1/Cxcr4/Irf1/Cd22/Cd300a/Card11/H2-Q4/H2-Q6/Cd28/Ccr2/H2-Q7/Irgm1/H2-T23/Cd74/Cxcl12/H2-DMb1/H2-Aa/Ighm/Slfn1/Cd38/Clec2…
GO:0170041	non-proteinogenic amino acid metabolic process	60	0.625614	1.70295	0.0015362	0.0015362	0.0269676	1609	tags=25%, list=11%, signal=22%	Ass1/Atp2b4/P4ha1/Egln1/Odc1/Slc38a1/Park7/Oaz1/Icmt/Prdx4/Pcmt1/Azin1/Mthfd1/P4hb/Asl
GO:0039532	negative regulation of cytoplasmic pattern recognition receptor signaling pathway	59	-0.699162	-1.68573	0.00154291	0.00154291	0.0269926	1399	tags=34%, list=9%, signal=31%	Gramd4/Itch/Ifi214/Sec14l1/Mefv/Trim11/Pcbp2/Cgas/Dhx58/Igtp/Irgm2/Ifi204/Trim30a/Ifi203/Mndal/Irgm1/Ifi211/Ifi209/Ifi206/Ifi213
GO:0120192	tight junction assembly	55	-0.718107	-1.7154	0.00155782	0.00155782	0.0271604	592	tags=13%, list=4%, signal=12%	Acvrl1/F11r/Pecam1/Ramp2/Esam/Cldn5/Cdh5
GO:1903131	mononuclear cell differentiation	433	-0.485228	-1.46754	0.00161233	0.00161233	0.0280152	1414	tags=20%, list=10%, signal=19%	Zfp36l1/Laptm5/Sp3/Smarcc2/Bmi1/Ifi214/Kdelr1/Itm2a/Nfatc1/Kmt2a/Mfng/Pknox1/Pparg/Zbtb1/Syk/Fzd7/Flt3l/Il15/Tmem176a/Sash3/Cebpg/Il6ra/Lgals9/Tgfbr2/Zfp36l2/Arid1a/Sh2b3/Ikzf1/Ifnar2/Hhex/Fbxo7/Wwp1/Ep300/Mef2c/Nfam1/Zbtb7b/Stat3/Nfkbid/B2m/Cd79b/Stat5b/Sox4/Tmem176b/Il4ra/Bcl6/Hlx/Cebpb/Pbx1/Ly9/Igtp/Rara/Pou2f2/Notch2/Sema4a/Vegfa/Pla2g2d/Lyl1/Mertk/Ifi204/Fosl2/Irf2bp2/Lfng/Fgl2/Cd83/Irf8/Bcl…
GO:0030513	positive regulation of BMP signaling pathway	27	-0.811854	-1.75779	0.00162969	0.00162969	0.0282103	734	tags=33%, list=5%, signal=32%	Eng/Acvrl1/Numa1/Notch2/Notch1/Kdr/Hes1/Tgfbr3/Cdh5
GO:0042742	defense response to bacterium	199	-0.551163	-1.5516	0.00163543	0.00163543	0.0282103	985	tags=24%, list=7%, signal=22%	Lgals9/Wfdc17/Gsdmd/Slc9a9/Hck/Lyz2/Ang/Rpl39/Slc30a1/Rarres2/Myd88/B2m/Tnfrsf1a/Znfx1/Naip5/Gbp3/Cebpb/Igtp/H2-K1/Notch2/Irgm2/H2-D1/Gbp2/H2-M3/Irf8/Bcl3/H2-T22/Oas2/Rnf213/Trf/Fcgr1/Plac8/H2-Q4/Gbp9/H2-Q6/H2-Q7/Irgm1/H2-T23/Gbp8/Iigp1/Oas1g/Tslp/Ighm/Oas3/Adamts4/Rnase6/Aqp1
GO:0170033	L-amino acid metabolic process	110	0.533225	1.61	0.00164804	0.00164804	0.0282103	1685	tags=26%, list=11%, signal=24%	Ass1/Atp2b4/Txnrd1/P4ha1/Egln1/Slc38a1/Gclm/Park7/Gcsh/Atf4/Mthfd2l/Icmt/Gclc/Prdx4/Got2/Pcmt1/Shmt2/Slc7a11/Glud1/Mthfd1/Nit2/Scly/Spr/Qdpr/Gpt2/Oat/P4hb/Asl/Dhfr
GO:0015986	proton motive force-driven ATP synthesis	43	0.664621	1.70579	0.00165117	0.00165117	0.0282103	3448	tags=70%, list=23%, signal=54%	Ndufab1/Ndufb8/Ndufb9/Ndufb10/Ndufb6/Ndufs5/Ndufc1/Ndufa8/Stoml2/Ndufs8/Ndufs7/Ndufb7/Ndufv2/Ndufs6/Ndufb2/Ndufb5/Ndufs1/Ndufb11/Ndufs4/Ndufc2/Sdhc/Ndufv3/Ndufa11/Ndufa9/Ndufa10/Ndufb3/Ndufa12/Ndufa1/Ndufv1/Ndufb4
GO:0042776	proton motive force-driven mitochondrial ATP synthesis	43	0.664621	1.70579	0.00165117	0.00165117	0.0282103	3448	tags=70%, list=23%, signal=54%	Ndufab1/Ndufb8/Ndufb9/Ndufb10/Ndufb6/Ndufs5/Ndufc1/Ndufa8/Stoml2/Ndufs8/Ndufs7/Ndufb7/Ndufv2/Ndufs6/Ndufb2/Ndufb5/Ndufs1/Ndufb11/Ndufs4/Ndufc2/Sdhc/Ndufv3/Ndufa11/Ndufa9/Ndufa10/Ndufb3/Ndufa12/Ndufa1/Ndufv1/Ndufb4
GO:0001959	regulation of cytokine-mediated signaling pathway	130	-0.601739	-1.61871	0.00169612	0.00169612	0.0288438	595	tags=18%, list=4%, signal=17%	Adar/Tnfrsf1a/Naip5/Irak2/Il6st/Crebrf/Parp14/Igtp/Irgm2/Samhd1/Parp9/Cxcr4/Nlrc5/Stat2/Irgm1/Axl/Cd74/Zbp1/Oas1g/Tslp/Cav1/Irf7/Oas3
GO:0042129	regulation of T cell proliferation	172	-0.572845	-1.59847	0.00169955	0.00169955	0.0288438	1438	tags=24%, list=10%, signal=22%	Tnfrsf1b/H2-Q10/Cd37/Laptm5/Itch/Mad1l1/Bmi1/Cd274/Syk/Il15/Sash3/Casp3/Lgals9/Tgfbr2/Tnfrsf21/Zbtb7b/Stat5b/Rac2/Bcl6/Il6st/Cebpb/H2-K1/H2-D1/Pla2g2d/Icosl/H2-T22/Hes1/Irf1/Card11/H2-Q4/H2-Q6/Cd28/Ccr2/H2-Q7/Irgm1/H2-T23/H2-DMb1/H2-Aa/Slfn1/Clec2i/Igf2
GO:0035809	regulation of urine volume	13	0.826864	1.7282	0.0017202	0.0017202	0.0290978	372	tags=23%, list=3%, signal=23%	Edn1/Nfat5/Adrb2
GO:0006364	rRNA processing	210	0.451143	1.46755	0.00173554	0.00173554	0.0292599	3065	tags=40%, list=21%, signal=32%	Rrs1/Utp18/Nat10/Nhp2/Ebna1bp2/Nol8/Pop5/Bop1/Mrto4/Mphosph10/Gtf2h5/Riok3/Ncl/Ddx54/Lyar/Nol7/Pop7/Bysl/Imp4/Utp11/Wdr12/Utp6/Utp15/Ddx21/Eif6/Sde2/Wdr43/Rps7/Rrp7a/Ftsj3/Mettl16/Rrp1/Brix1/Dcaf13/Pa2g4/Nol11/Npm1/Tsr1/Nop14/Rrp12/Chd7/Lsm6/Mak16/Gtpbp4/Rpl14/Rpl11/Rpl10a/Utp20/Bud23/Znhit6/Dkc1/Rpf2/Rsl1d1/Utp14b/Pelp1/Srfbp1/Bms1/Rrp15/Rexo4/Exosc9/Nsun5/Ddx52/Ddx49/Nifk/Wdr74/Rps6/Rps24/Tbl3/…
GO:0032817	regulation of natural killer cell proliferation	19	-0.853017	-1.75838	0.00174125	0.00174125	0.0292599	1404	tags=58%, list=10%, signal=52%	H2-Q10/Flt3l/Il15/Stat5b/H2-K1/H2-D1/H2-T22/H2-Q4/H2-Q6/H2-Q7/H2-T23
GO:0060330	regulation of response to type II interferon	13	-0.883334	-1.70928	0.00177248	0.00177248	0.0295901	419	tags=54%, list=3%, signal=52%	Pparg/Parp14/Igtp/Irgm2/Parp9/Nlrc5/Irgm1
GO:0060334	regulation of type II interferon-mediated signaling pathway	13	-0.883334	-1.70928	0.00177248	0.00177248	0.0295901	419	tags=54%, list=3%, signal=52%	Pparg/Parp14/Igtp/Irgm2/Parp9/Nlrc5/Irgm1
GO:0032943	mononuclear cell proliferation	287	-0.507817	-1.48881	0.001798	0.001798	0.0298489	1448	tags=22%, list=10%, signal=20%	P2rx7/Tnfrsf1b/H2-Q10/Cd37/Laptm5/Itch/Slc11a1/Mad1l1/Bmi1/Cd40/Cd274/Syk/Flt3l/Il15/Sash3/Casp3/Lgals9/Tgfbr2/Tnfrsf21/Ifnar2/Csf1r/Elf4/Mef2c/Zbtb7b/Myd88/Stat5b/Rac2/Bcl6/Cdkn1a/Il6st/Cfb/Cebpb/H2-K1/H2-D1/Fcgr2b/Pla2g2d/Ebi3/Fosl2/Icosl/Lst1/H2-T22/Hes1/Cxcr4/Irf1/Cd22/Cd300a/Card11/H2-Q4/H2-Q6/Cd28/Ccr2/H2-Q7/Irgm1/H2-T23/Cd74/Cxcl12/H2-DMb1/H2-Aa/Ighm/Slfn1/Cd38/Clec2i/Igf2
GO:0008202	steroid metabolic process	201	0.448457	1.45787	0.00180213	0.00180213	0.0298489	627	tags=15%, list=4%, signal=14%	Dhcr24/Sqle/Fdps/Idi1/Ch25h/Dhrs9/Cyp51/Tnf/Apobr/Msmo1/Mvd/Wnt4/Sirt1/Srebf2/Hmgcs1/Ldlr/Hsd17b12/Pmvk/Rest/Acbd3/Pmp22/Atp1a1/Stard4/Insig1/Hdlbp/Nfkb1/Cyb5r3/Ywhah/Fdft1/Fdx1
GO:0051897	positive regulation of phosphatidylinositol 3-kinase/protein kinase B signal transduction	149	-0.573133	-1.56986	0.00180835	0.00180835	0.0298489	1272	tags=21%, list=9%, signal=19%	Nox4/Sema4d/Sema5a/Cx3cr1/P2ry12/Fermt2/Gcnt2/Egfr/Csf1r/Eng/Hcst/Osm/P2rx4/Insr/C1qtnf1/Dcn/Hpse/Vegfa/Mertk/Tcf7l2/Vav2/Kdr/Gdf15/Thbs1/Pdgfrb/Cd28/Pdgfra/Axl/Cxcl12/Flt1/Igf2
GO:0048880	sensory system development	298	-0.513116	-1.51199	0.0018172	0.0018172	0.0298489	1184	tags=13%, list=8%, signal=13%	Nrp1/Rarg/P2ry12/Gdf3/Pbx2/Rhoj/Tgfbr2/Tgif1/Arid1a/Egfr/Casp6/Ikzf1/Maf/Stat3/Acvrl1/Mfap2/Sox4/Ctns/Cdkn1b/Map3k1/Pbx1/Rara/Notch2/Lrp5/Vegfa/Notch1/Mertk/Cdkn1c/Kdr/Zeb1/Hes1/Rpgrip1/Nfia/Pdgfrb/Pdgfra/Nfib/Gas1/Col4a1/Flt1/Aqp1
GO:0150063	visual system development	298	-0.513116	-1.51199	0.0018172	0.0018172	0.0298489	1184	tags=13%, list=8%, signal=13%	Nrp1/Rarg/P2ry12/Gdf3/Pbx2/Rhoj/Tgfbr2/Tgif1/Arid1a/Egfr/Casp6/Ikzf1/Maf/Stat3/Acvrl1/Mfap2/Sox4/Ctns/Cdkn1b/Map3k1/Pbx1/Rara/Notch2/Lrp5/Vegfa/Notch1/Mertk/Cdkn1c/Kdr/Zeb1/Hes1/Rpgrip1/Nfia/Pdgfrb/Pdgfra/Nfib/Gas1/Col4a1/Flt1/Aqp1
GO:0071345	cellular response to cytokine stimulus	675	-0.445808	-1.38445	0.0018365	0.0018365	0.0300693	1214	tags=17%, list=8%, signal=17%	Pparg/Dok1/Smpd3/Rarg/Syk/Plvap/Ticam2/Ccl11/Kdm5b/Il15/Nr1d1/Cx3cr1/Il6ra/Dab2ip/Gbp7/Zyx/Irf5/Cebpa/Birc3/Cd47/Grk2/Il21r/Eif4a2/Zfp36l2/Il10ra/Sh2b3/Rab20/Tnfrsf21/Ifnar2/Ptp4a3/Il10rb/Csf1r/Ep300/Osm/Rab43/Trim25/Mras/Gstt2/Adipor1/Asah1/Stat3/Myd88/Adar/Tnfrsf1a/Etv3/Naip5/Stat5b/Il4ra/Irak2/Ccl24/Gbp3/Nfe2l2/Ifngr1/Il6st/Daxx/Tut4/Nsmaf/Gm5431/Evl/Cebpb/Crebrf/Parp14/Igtp/Irgm2/Csf3r/Zfp36/…
GO:0071103	DNA conformation change	56	0.630385	1.70326	0.00186001	0.00186001	0.0303569	1198	tags=27%, list=8%, signal=25%	Zranb3/Mcm5/Anxa1/Mcm2/Mcm3/Nbn/Mcm7/Mcm4/Ddx1/Hnrnpa2b1/Mcm6/Top1/Gins2/Ascc3/Dhx9
GO:0009060	aerobic respiration	152	0.486241	1.54085	0.00187256	0.00187256	0.0304644	2798	tags=42%, list=19%, signal=34%	Bnip3/Tnf/Nupr1/Myc/Vcp/Ndufab1/Park7/Cox5a/Ndufb8/Coq7/Ndufb9/Hif1a/Gadd45gip1/Ndufb10/Ndufb6/Ndufs5/Uqcc2/Ndufc1/Atp7a/Ndufa8/Stoml2/Fxn/Shmt2/Ndufs8/Cox4i1/Uqcrq/Chchd2/Ndufs7/Ndufb7/Chchd10/Uqcr11/Ndufv2/Mdh2/Cox7b/Cs/Ndufs6/Ndufb2/Fh1/Ndufb5/Idh2/Ndufs1/Ndufb11/Ndufs4/Suclg1/Iscu/Dlst/Ndufc2/Mdh1/Afg1l/Sdhc/Dld/Pdha1/Cox10/Cox6a1/Adsl/Acly/Ndufv3/Ndufa11/Rhoa/Cox7a2/Akt1/Ccnb1/Sucla2/Cdk1
GO:0045601	regulation of endothelial cell differentiation	38	-0.76051	-1.72976	0.00190673	0.00190673	0.0309219	592	tags=26%, list=4%, signal=25%	Acvrl1/Tnfrsf1a/F11r/Btg1/Foxj2/Vegfa/Notch1/Zeb1/Cldn5/Cdh5
GO:0045216	cell-cell junction organization	155	-0.581839	-1.59878	0.0019348	0.0019348	0.0312777	592	tags=8%, list=4%, signal=8%	Acvrl1/F11r/Csk/Vegfa/Jup/Ace/Pecam1/Cav1/Ramp2/Esam/Cldn5/Aplnr/Cdh5
GO:0097202	activation of cysteine-type endopeptidase activity	22	-0.83511	-1.74423	0.00195848	0.00195848	0.0315517	341	tags=41%, list=2%, signal=40%	Asph/Casp8/Ifi204/Ifi203/Mndal/Ifi211/Ifi209/Ifi206/Ifi213
GO:0006164	purine nucleotide biosynthetic process	175	0.472708	1.50733	0.00196932	0.00196932	0.0315517	1823	tags=26%, list=12%, signal=23%	Aldoa/Ampd3/Pdk1/Eno1/Myc/Nme1/Vcp/Ndufab1/Aprt/Nme2/Acsl1/Ndufb8/Ndufb9/Ndufb10/Impdh1/Ndufb6/Mthfd2l/Ndufs5/Bcl2l1/Gmpr/Pank3/Ndufc1/Mpc1/Ndufa8/Stoml2/Ndufs8/Nudt2/Pdk3/Mthfd1/Acot7/Ndufs7/Papss1/Ndufb7/Ndufv2/Mpc2/Ndufs6/Slc25a13/Ndufb2/Ndufb5/Idh2/Vdac1/Adcy3/Ndufs1/Ndufb11/Ak2
GO:1904951	positive regulation of establishment of protein localization	295	0.410797	1.404	0.00197519	0.00197519	0.0315517	1953	tags=24%, list=13%, signal=22%	Cdk5r1/Bbc3/Ccl2/Tnf/Mmp13/Itgam/Kcnn4/Sirt1/Mdm2/Ran/Cd81/Pik3r1/Bag3/Hras/Hsp90aa1/Cct3/Dynll1/Pdcd5/Myh9/Dnm1l/Cib1/Cct6a/Adam9/Hsp90ab1/Kif5b/Vps35/Gpr68/Ppia/Oaz1/Prkar1a/Cct2/Cep290/Hif1a/Stx4a/Tcp1/Camk1/Rab34/Ywhae/Bsg/Anxa7/Anp32b/Rufy3/B3gat3/Tomm70a/Flna/Tmem97/Oga/Glud1/Plk3/Cct8/Cct7/Mpc2/Sfn/Gsk3b/Tpr/Sar1a/Tardbp/Arpc2/Tlr2/App/Ipo5/Tmem30a/Jak2/Commd1/Hnrnpm/Cdc42/Atg7/Kif3a/Cnst/…
GO:0072522	purine-containing compound biosynthetic process	182	0.471447	1.51242	0.00197645	0.00197645	0.0315517	1823	tags=25%, list=12%, signal=22%	Aldoa/Ampd3/Pdk1/Eno1/Myc/Nme1/Vcp/Ndufab1/Aprt/Nme2/Acsl1/Ndufb8/Ndufb9/Ndufb10/Impdh1/Ndufb6/Mthfd2l/Ndufs5/Bcl2l1/Gmpr/Spp1/Pank3/Ndufc1/Mpc1/Ndufa8/Stoml2/Ndufs8/Nudt2/Pdk3/Mthfd1/Acot7/Ndufs7/Papss1/Ndufb7/Ndufv2/Mpc2/Ndufs6/Slc25a13/Ndufb2/Ndufb5/Idh2/Vdac1/Adcy3/Ndufs1/Ndufb11/Ak2
GO:1905562	regulation of vascular endothelial cell proliferation	24	-0.822413	-1.75936	0.0019943	0.0019943	0.0316544	666	tags=33%, list=5%, signal=32%	Pparg/Itga4/Mef2c/Stat3/Col18a1/Flt1/Igf2/Dlk1
GO:0009137	purine nucleoside diphosphate catabolic process	90	0.557632	1.64058	0.00200147	0.00200147	0.0316544	803	tags=18%, list=5%, signal=17%	Aldoc/Pgk1/Pkm/Aldoa/Tpi1/Ampd3/Pfkl/Pgam1/Nupr1/Eno1/Gapdh/Myc/Pfkp/Gpi1/Hif1a/Galk1
GO:0009181	purine ribonucleoside diphosphate catabolic process	90	0.557632	1.64058	0.00200147	0.00200147	0.0316544	803	tags=18%, list=5%, signal=17%	Aldoc/Pgk1/Pkm/Aldoa/Tpi1/Ampd3/Pfkl/Pgam1/Nupr1/Eno1/Gapdh/Myc/Pfkp/Gpi1/Hif1a/Galk1
GO:0032508	DNA duplex unwinding	42	0.670318	1.70953	0.00201278	0.00201278	0.0317349	1198	tags=29%, list=8%, signal=26%	Mcm5/Anxa1/Mcm2/Mcm3/Nbn/Mcm7/Mcm4/Ddx1/Mcm6/Gins2/Ascc3/Dhx9
GO:0072001	renal system development	264	-0.520993	-1.51132	0.00202214	0.00202214	0.0317844	666	tags=11%, list=5%, signal=11%	Mef2c/Gatm/Sox4/Ctns/Adamts1/Aph1c/Pbx1/Rara/Bicc1/Notch2/Vegfa/Notch1/Cdkn1c/Wwtr1/Hes1/Id3/Cxcr4/Stat1/Nfia/Pdgfrb/Nid1/Pdgfra/Ace/Col4a1/Notch3/Heyl/Lama5/Aqp1/Agtr2
GO:0001911	negative regulation of leukocyte mediated cytotoxicity	30	-0.792602	-1.72827	0.00203495	0.00203495	0.0317987	1404	tags=47%, list=10%, signal=42%	H2-Q10/Clec2d/Cx3cr1/Lgals9/Tap2/H2-K1/H2-D1/Tap1/H2-T22/H2-Q4/H2-Q6/H2-Q7/H2-T23/Igf2
GO:0046651	lymphocyte proliferation	281	-0.514403	-1.50354	0.00203549	0.00203549	0.0317987	1448	tags=22%, list=10%, signal=21%	P2rx7/Tnfrsf1b/H2-Q10/Cd37/Laptm5/Itch/Slc11a1/Mad1l1/Bmi1/Cd40/Cd274/Syk/Flt3l/Il15/Sash3/Casp3/Lgals9/Tgfbr2/Tnfrsf21/Ifnar2/Csf1r/Elf4/Mef2c/Zbtb7b/Myd88/Stat5b/Rac2/Bcl6/Cdkn1a/Il6st/Cfb/Cebpb/H2-K1/H2-D1/Fcgr2b/Pla2g2d/Ebi3/Fosl2/Icosl/Lst1/H2-T22/Hes1/Cxcr4/Irf1/Cd22/Cd300a/Card11/H2-Q4/H2-Q6/Cd28/Ccr2/H2-Q7/Irgm1/H2-T23/Cd74/Cxcl12/H2-DMb1/H2-Aa/Ighm/Slfn1/Cd38/Clec2i/Igf2
GO:0034470	ncRNA processing	378	0.391403	1.35889	0.00208184	0.00208184	0.0324236	3387	tags=37%, list=23%, signal=29%	Ints2/Rrs1/Utp18/Nat10/Nhp2/Ebna1bp2/Zc3h7a/Nol8/Pop5/Mettl1/Ncbp2/Ddx1/Srsf3/Bop1/Hnrnpa2b1/Mrto4/Mphosph10/Gtf2h5/Riok3/Ncl/Ddx54/Lyar/Kti12/Nol7/Pop7/Bysl/Imp4/Nsun2/Utp11/Wdr12/Utp6/Utp15/Ddx21/Eif6/Elac2/Sde2/Wdr43/Rps7/Rrp7a/Ftsj3/Mettl16/Rrp1/Brix1/Dcaf13/Tarbp2/Pa2g4/Pusl1/Nol11/Trp53/Qtrt1/Npm1/Tsr1/Nop14/Rrp12/Chd7/Lsm6/Tdrkh/Mak16/Gtpbp4/Yrdc/Rpl14/Rpl11/Rpl10a/Trmt61a/Utp20/Bud23/Znhi…
GO:1905475	regulation of protein localization to membrane	178	0.470869	1.50354	0.0021017	0.0021017	0.0326334	1907	tags=22%, list=13%, signal=20%	Cdk5r1/Ccl2/Tnf/Atp2b4/Itgam/Stx3/Lgals3/Cd81/Gripap1/Pik3r1/Hras/Pdcd5/Gsn/Cib1/Ppfia1/Ezr/Slc5a3/Kif5b/Stx4a/Bcl2l1/Itgb1/Stac2/Stx8/Ldlrap1/Slc7a11/Zdhhc5/Pik3ca/Dab2/Vamp7/Gsk3b/Rab11a/Tmed2/Arpc2/Ap2m1/Fnta/Rangrf/Commd1/Vti1b/Cnst/Mff
GO:0010824	regulation of centrosome duplication	43	0.658539	1.69018	0.00211303	0.00211303	0.0327098	2254	tags=35%, list=15%, signal=30%	Ccnf/Plk2/Sirt1/Nat10/Nup62/Chmp2b/Azin1/Pdcd6ip/Cdk5rap2/Npm1/Rock2/Xpo1/Chmp2a/Nubp1/Ppp1r35
GO:0035904	aorta development	65	-0.674181	-1.64222	0.00216351	0.00216351	0.0333901	895	tags=18%, list=6%, signal=17%	Tgfbr2/Kat6a/Eng/Acvrl1/Ndst1/Sox4/Notch1/Hes1/Cxcr4/Pdgfrb/Mylk/Aplnr
GO:0034341	response to type II interferon	122	-0.595164	-1.59129	0.00217669	0.00217669	0.0334924	528	tags=29%, list=4%, signal=28%	Pparg/Ccl11/Mefv/Gbp7/Zyx/Cd47/Rab20/Rab43/Ccl24/Gbp3/Ifngr1/Daxx/Evl/Parp14/Igtp/Irgm2/Bst2/Ccl6/Gbp2/Irf8/Parp9/Irf1/Stat1/Nlrc5/Sp100/Gbp9/H2-Q7/Irgm1/Ifitm3/Cd74/Gbp8/H2-Eb1/H2-Aa/H2-Ab1/Ciita
GO:0141091	transforming growth factor beta receptor superfamily signaling pathway	262	-0.521754	-1.51065	0.00222805	0.00222805	0.0341217	1230	tags=19%, list=8%, signal=17%	Htra3/Pparg/Tnrc6c/Flcn/Smpd3/Fut8/Gdf3/Fermt2/Pxn/Zyx/Lgals9/Lpxn/Tgfbr2/Tgif1/Gcnt2/Arid4a/Pdcd4/Eng/Ep300/Stat3/Gpr155/Acvrl1/Numa1/Dusp22/Sorl1/Map3k1/Bambi/Notch2/Fos/Nrros/Notch1/Tcf7l2/Cdkn1c/Pml/Kdr/Zeb1/Hes1/Thbs1/Nfia/Nbl1/Tgfbr3/Peg10/Hpgd/Ltbp4/Cav1/Rgma/Nrep/Cldn5/Cdh5
GO:0016339	calcium-dependent cell-cell adhesion via plasma membrane cell adhesion molecules	22	-0.832319	-1.7384	0.00223095	0.00223095	0.0341217	5	tags=14%, list=0%, signal=14%	Cdh11/Cdh13/Cdh5
GO:0045765	regulation of angiogenesis	249	-0.519812	-1.5022	0.00227029	0.00227029	0.0346197	1408	tags=22%, list=10%, signal=21%	Foxo4/Cybb/Sulf1/Tie1/Glul/Sema5a/Pparg/Cd40/Flcn/Nrp1/Ccl11/C3ar1/Ccm2/Cx3cr1/Pxn/Dab2ip/Tcf4/Rhoj/Tgfbr2/Amot/Sh2b3/Hhex/Eng/Stat3/Rhob/Acvrl1/Tnfrsf1a/Adamts1/Ccl24/Ctsh/Btg1/Dcn/Klf2/Nfe2l2/Foxj2/Pik3cd/Sema4a/Vegfa/Jup/Pml/Kdr/Smoc2/Thbs1/Cxcr4/Stat1/Sp100/Ccr2/Col4a2/Flt1/Ramp2/Igf2/Cd34/Cldn5/Aplnr/Aqp1/Cdh5
GO:0009191	ribonucleoside diphosphate catabolic process	94	0.550694	1.63189	0.00235787	0.00235787	0.0358481	288	tags=14%, list=2%, signal=14%	Aldoc/Pgk1/Pkm/Aldoa/Tpi1/Ampd3/Pfkl/Pgam1/Nupr1/Eno1/Gapdh/Myc/Pfkp
GO:0098742	cell-cell adhesion via plasma-membrane adhesion molecules	126	-0.598831	-1.60539	0.0023851	0.0023851	0.0361545	143	tags=12%, list=1%, signal=12%	Cdh13/Mcam/Epha3/Scarf1/Itga4/Lgals9/Nectin4/Tgfbr2/Taok2/Ptprd/Pecam1/Sparcl1/Hmcn2/Esam/Cdh5
GO:0002429	immune response-activating cell surface receptor signaling pathway	231	-0.528238	-1.50951	0.00240294	0.00240294	0.0363172	1445	tags=22%, list=10%, signal=20%	Lbp/H2-Q10/Laptm5/Oas1a/Rab11fip2/Lcp2/Syk/Ticam2/C3ar1/Nr1d1/Nmi/Dab2ip/Lpxn/Cd47/Klhl6/Ifi35/Tnfrsf21/C5ar2/Mef2c/Nfam1/Cd14/Myd88/Pde4b/Nfkbid/Cd79b/Dusp22/Irak2/Dennd1b/Csk/Cmklr1/Usp12/H2-K1/Tlr1/H2-D1/Ly96/Fosl2/Icosl/Cd22/Cd300a/Card11/H2-Q4/H2-Q6/Cd28/H2-Q7/Scimp/Themis2/Oas1g/Ighm/Cd38/Clec2i
GO:0043604	amide biosynthetic process	684	0.344616	1.26636	0.00241362	0.00241362	0.0363403	2542	tags=30%, list=17%, signal=26%	Pkm/Tnf/Ass1/Pdk1/Ptrh1/Ppp1r15a/Cpeb4/Bdh2/Gapdh/Sgms2/Mrpl41/Gclm/Gspt1/Mrps6/Nat10/Larp4/Mrps28/Eif3b/Mrpl20/Mrpl54/Ncbp2/Syncrip/Acsl1/Calr/Mrpl12/Dapk1/Lrpprc/Dhx29/Mrpl51/Per2/Mrps12/Eif3a/Abce1/Dnajc3/Eif4g2/Srp9/Mrpl14/Mrps10/Eif4ebp1/Usp16/Gadd45gip1/Mrps14/C1qbp/Caprin2/Eif2s1/Eif4g1/Mrpl34/Eif5a/Uqcc2/Mrpl57/Mrpl43/Aurkaip1/Mpc1/Mrps15/Dap3/Coa3/Usp10/Ncl/Mrpl18/Ybx1/Mrps26/Caprin1/Mrp…
GO:1902652	secondary alcohol metabolic process	112	0.5217	1.58407	0.002422	0.002422	0.0363403	627	tags=18%, list=4%, signal=17%	Dhcr24/Sqle/Fdps/Idi1/Ch25h/Cyp51/Apobr/Msmo1/Mvd/Srebf2/Hmgcs1/Ldlr/Pmvk/Pmp22/Stard4/Insig1/Hdlbp/Cyb5r3/Fdft1/Fdx1
GO:0043062	extracellular structure organization	259	-0.508025	-1.47082	0.0024258	0.0024258	0.0363403	1214	tags=15%, list=8%, signal=14%	Pparg/Mmp19/Smpd3/Lamc1/Colgalt1/Clasp2/Ddr2/Aebp1/Ctss/Col14a1/Gpm6b/Lama2/Idua/Eng/Cst3/Tnfrsf1a/Lamb1/Adamts1/Dpt/Hspg2/Col5a3/Antxr1/Notch1/Bcl3/Mmp2/Col18a1/Smoc2/Col15a1/Tgfbr3/Nid1/Adamts12/Pdgfra/Ltbp4/Col4a1/Col4a2/Cav1/Tnxb/Ramp2/Adamts4/Myh11
GO:0045597	positive regulation of cell differentiation	783	-0.4339	-1.35285	0.00246224	0.00246224	0.0367783	1225	tags=14%, list=8%, signal=14%	Tshz3/Pparg/Zbtb1/Nrp1/Syk/Lamc1/Flt3l/Il15/Sash3/Rin2/Cx3cr1/Gdf3/Fermt2/S1pr2/Ddr2/Serpine2/Tcf4/Lgals9/Cebpa/Hopx/Ncoa3/Casp8/Eef2k/Tgfbr2/Jund/Tgif1/Arid1a/Stk4/Gcnt2/Klf10/Egfr/Pim1/Ikzf1/Lama2/Crebl2/Csf1r/Eng/Rarres2/Ep300/Evi2/Jade2/Mef2c/Zbtb7b/Stat3/Foxo3/Nfkbid/Parp2/Acvrl1/Trib1/Numa1/Nedd9/Lamb1/Stat5b/Sox4/Synj1/Il4ra/Bcl6/F11r/Btg1/Hlx/Il6st/Cmklr1/Marcks/Cebpb/Zfp385a/Bambi/Junb/R…
GO:1901617	organic hydroxy compound biosynthetic process	161	0.487985	1.54795	0.00251029	0.00251029	0.0373867	639	tags=19%, list=4%, signal=18%	Dhcr24/Sqle/Fdps/Idi1/Ch25h/Cyp51/Tnf/Msmo1/Ldha/Mvd/Wnt4/Rapgef2/Sirt1/Srebf2/Hmgcs1/Park7/Pmvk/Pgp/Rest/Nus1/Myh9/Stard4/Ddt/Insig1/Gipc1/Nfkb1/Cyb5r3/Per2/Fdft1/Vps35
GO:0016125	sterol metabolic process	107	0.536882	1.617	0.00260957	0.00260957	0.0387084	627	tags=19%, list=4%, signal=18%	Dhcr24/Sqle/Fdps/Idi1/Ch25h/Cyp51/Apobr/Msmo1/Mvd/Srebf2/Hmgcs1/Ldlr/Pmvk/Pmp22/Stard4/Insig1/Hdlbp/Cyb5r3/Fdft1/Fdx1
GO:0003171	atrioventricular valve development	26	-0.795487	-1.71276	0.00262074	0.00262074	0.0387084	895	tags=23%, list=6%, signal=22%	Tgfbr2/Mdm4/Sox4/Notch1/Heyl/Aplnr
GO:0062207	regulation of pattern recognition receptor signaling pathway	157	-0.575629	-1.57909	0.00263799	0.00263799	0.0387084	1589	tags=25%, list=11%, signal=22%	Otud4/Tlr4/Nop53/Lbp/Gramd4/Itch/Ifi214/Sec14l1/Ticam2/Pum2/Nr1d1/Mefv/Trim11/Dab2ip/Pcbp2/Ifi35/Eif2ak2/Cgas/Cd14/Myd88/Dhx58/Igtp/Tlr1/Irgm2/Ifi204/Trim30a/Gbp2/Irf1/Cd300a/Ifi203/Ddx60/Mndal/Irgm1/Ifi211/Ifi209/Cav1/Irf7/Ifi206/Ifi213
GO:0090150	establishment of protein localization to membrane	229	0.440559	1.44733	0.0026439	0.0026439	0.0387084	2297	tags=30%, list=16%, signal=25%	Cdk5r1/Ccl2/Itgam/Zdhhc18/Hspa5/Stx3/Timm13/Cd24a/Ubl4a/Gripap1/Hras/Hsp90aa1/Pdcd5/Rab8b/Sgta/Cib1/Timm10/Emc8/Hspa4/Golga4/Vps35/Srp9/Tomm40/Stx4a/Srp14/Rab34/Sec61b/Bax/Sec63/Sacm1l/Tomm70a/Emc6/Oga/Rab7/Macf1/Scrib/Vamp7/Rab10/Atp13a1/Ccdc47/Samm50/Pex16/Emc2/Rab11a/Arpc2/Timm22/Cox18/Srp19/Maip1/Ncln/Zdhhc20/Commd1/Zdhhc14/Srp72/Cnst/Mff/Rilpl1/Micall1/Fyn/Bag6/Zfand2b/Rab3gap2/Vps37a/Lypla1…
GO:0034368	protein-lipid complex remodeling	15	-0.859437	-1.69043	0.00264969	0.00264969	0.0387084	549	tags=33%, list=4%, signal=32%	Scarb1/Pltp/Abcg1/Apoe/Apoc1
GO:0034369	plasma lipoprotein particle remodeling	15	-0.859437	-1.69043	0.00264969	0.00264969	0.0387084	549	tags=33%, list=4%, signal=32%	Scarb1/Pltp/Abcg1/Apoe/Apoc1
GO:0030224	monocyte differentiation	39	-0.750919	-1.70943	0.00265208	0.00265208	0.0387084	375	tags=26%, list=3%, signal=25%	Mef2c/Vegfa/Ifi204/Ifi203/Mndal/Ifi211/Ifi209/Cd74/Ifi206/Ifi213
GO:1901137	carbohydrate derivative biosynthetic process	506	0.365454	1.30313	0.0027	0.0027	0.0392955	2458	tags=23%, list=17%, signal=20%	Pgk1/Aldoa/Tpi1/Ampd3/Pgam1/Pdk1/Eno1/Tnip1/Gapdh/Tk1/Myc/Galnt6/Nme1/Vcp/Phlda1/Ndufab1/Aprt/Ostc/Rpn1/Nme2/Dtymk/Galnt2/Nus1/Acsl1/Ndufb8/Mlec/Nfkb1/Ndufb9/Dut/Ndufb10/Impdh1/Ndufb6/Ndufs5/Bcl2l1/Gmpr/Rrm1/Uap1l1/Pank3/Ndufc1/Mpc1/Chst11/Atp7a/Dnph1/Galnt7/Ndufa8/Tkt/Stoml2/B3gat3/Xylt2/Ndufs8/Nudt2/Magt1/Uck2/Pdgfb/Pdk3/Oga/Mthfd1/Acot7/Hs2st1/Ext1/Ndufs7/Papss1/Ndufb7/Ndufv2/Mdh2/Mpc2/Pomgnt1…
GO:0018209	peptidyl-serine modification	249	0.433487	1.44769	0.0027114	0.0027114	0.0393494	1704	tags=19%, list=12%, signal=17%	Ifnb1/Cdk5r1/Dyrk3/Tnf/Plk2/Mif/Atp2b4/Ppp1r15a/Gadd45a/Ercc6/Smad7/Fnip2/Txn1/Stk38l/Park7/Galnt2/Cab39/Ripk2/Eif4g1/Camk1/Rps6ka2/Bax/Cd44/Akap9/Bak1/Top1/Nek6/Mark2/Pdk3/Srpk2/Csnk2a2/Pde4d/Clspn/Tlk1/Mast2/Gsk3b/Srpk1/Dyrk1a/Hipk3/Sgk1/Tfrc/Rock2/App/Mapkapk2/Mastl/Bcl2/Rps6kb1
GO:0008203	cholesterol metabolic process	102	0.543784	1.62788	0.00273692	0.00273692	0.0396072	627	tags=20%, list=4%, signal=19%	Dhcr24/Sqle/Fdps/Idi1/Ch25h/Cyp51/Apobr/Msmo1/Mvd/Srebf2/Hmgcs1/Ldlr/Pmvk/Pmp22/Stard4/Insig1/Hdlbp/Cyb5r3/Fdft1/Fdx1
GO:0008285	negative regulation of cell population proliferation	597	-0.447205	-1.37934	0.00279551	0.00279551	0.0403408	1274	tags=17%, list=9%, signal=16%	Cdh13/Nox4/Nfatc1/Kmt2a/Taf6/Pparg/Flcn/Rarg/Cd274/Il15/Ppp2r3d/S1pr2/Nmi/Casp3/Dab2ip/Gna12/Tfap4/Serpine2/Lgals9/Asph/Cebpa/Ulk1/Gstp1/Tgfbr2/Tgif1/Stk4/Ifi35/Sh2b3/Tnfrsf21/Eif2ak2/Ang/Klf9/Pdcd4/Csf1r/Eng/Slc16a2/Mef2c/Zbtb7b/Stat3/Rnf139/Pttg1/B2m/Acvrl1/Trib1/Etv3/Sox4/Bcl6/Trp53inp1/Cdkn1a/Btg1/Dpt/Cdkn1b/Csk/Hspg2/Zfas1/Cebpb/Cdkn2d/Rara/H2-K1/H19/H2-D1/Fcgr2b/Pla2g2d/Notch1/Cdkn1c/Pml/Ls…
GO:0046635	positive regulation of alpha-beta T cell activation	75	-0.653927	-1.62912	0.00282713	0.00282713	0.0405687	637	tags=25%, list=4%, signal=24%	Zbtb7b/Nfkbid/Il4ra/Hlx/Rara/H2-K1/H2-D1/Cd83/H2-T22/Irf1/Card11/H2-Q4/H2-Q6/Cd28/Ccr2/H2-Q7/Irgm1/H2-T23/H2-Ab1
GO:0072006	nephron development	117	-0.584667	-1.54379	0.00282949	0.00282949	0.0405687	666	tags=14%, list=5%, signal=13%	Mef2c/Ctns/Pbx1/Notch2/Vegfa/Notch1/Wwtr1/Hes1/Pdgfrb/Nid1/Pdgfra/Notch3/Heyl/Lama5/Aqp1/Agtr2
GO:0046631	alpha-beta T cell activation	175	-0.547033	-1.53207	0.00283513	0.00283513	0.0405687	1181	tags=22%, list=8%, signal=21%	Cd274/Syk/Il15/Sash3/Il6ra/Lgals9/Tgfbr2/Elf4/Zbtb7b/Stat3/Nfkbid/Il4ra/Bcl6/Hlx/Cebpb/Ly9/Igtp/Rara/H2-K1/H2-D1/Sema4a/Pla2g2d/Fosl2/Cd83/H2-M3/Bcl3/H2-T22/Irf1/Cd300a/Card11/H2-Q4/H2-Q6/Cd28/Ccr2/H2-Q7/Irgm1/Batf/H2-T23/H2-Ab1
GO:0050851	antigen receptor-mediated signaling pathway	144	-0.579879	-1.58159	0.00285504	0.00285504	0.0406057	982	tags=18%, list=7%, signal=17%	Lpxn/Klhl6/Tnfrsf21/Mef2c/Nfam1/Pde4b/Nfkbid/Cd79b/Dusp22/Dennd1b/Usp12/H2-K1/H2-D1/Fosl2/Icosl/Cd22/Cd300a/Card11/H2-Q4/H2-Q6/Cd28/H2-Q7/Themis2/Ighm/Cd38/Clec2i
GO:0050671	positive regulation of lymphocyte proliferation	132	-0.592305	-1.59861	0.00285516	0.00285516	0.0406057	1210	tags=24%, list=8%, signal=22%	Cd40/Cd274/Syk/Flt3l/Il15/Sash3/Tgfbr2/Csf1r/Mef2c/Myd88/Stat5b/Bcl6/Cdkn1a/Il6st/H2-K1/H2-D1/Icosl/H2-T22/Hes1/Card11/H2-Q4/H2-Q6/Cd28/Ccr2/H2-Q7/Irgm1/H2-T23/Cd74/H2-DMb1/Ighm/Cd38/Igf2
GO:0022411	cellular component disassembly	432	0.381156	1.34202	0.00286156	0.00286156	0.0406057	2166	tags=23%, list=15%, signal=20%	Dyrk3/Bnip3/Tnf/Ptrh1/Diaph3/Mmp13/Itgam/Myc/Gspt1/Pdpn/Cd24a/Vcp/Stmn1/Capg/Plaat3/Adrb2/Pik3r1/Uba5/Lcp1/Smcr8/Gsn/Dnm1l/Ufm1/Irak3/Cib1/Hspa2/Per2/C3/Plxnc1/Chmp2b/Epg5/Abce1/Kif5b/Hif1a/Sptan1/Eif5a/Itgb1/Wdr1/Smarca4/Eps8/Calm1/Atp2a2/Usp10/Ubqln1/Chka/Bax/Eif4e2/Smurf1/Tom1/Cfl1/Slc25a4/Nes/Plin3/Atg5/Ascc3/Lima1/Oga/Pafah1b1/Plk3/Mical1/Pik3ca/Swap70/Grwd1/Denr/Etf1/Gsk3b/Mical2/Spast/Scaf…
GO:0001914	regulation of T cell mediated cytotoxicity	36	-0.743027	-1.68044	0.00288296	0.00288296	0.0407961	1448	tags=36%, list=10%, signal=33%	P2rx7/H2-Q10/H2-T24/Tap2/B2m/H2-K1/H2-D1/H2-M3/H2-T22/H2-Q4/H2-Q6/H2-Q7/H2-T23
GO:0035036	sperm-egg recognition	25	0.744469	1.73497	0.00290167	0.00290167	0.0408069	1942	tags=40%, list=13%, signal=35%	Aldoa/Cct3/Cct6a/Cct2/Tcp1/Cd9/Cct8/Cct7/Vdac2/Cct5
GO:0032946	positive regulation of mononuclear cell proliferation	135	-0.584719	-1.58258	0.00290528	0.00290528	0.0408069	1210	tags=24%, list=8%, signal=22%	Cd40/Cd274/Syk/Flt3l/Il15/Sash3/Tgfbr2/Csf1r/Mef2c/Myd88/Stat5b/Bcl6/Cdkn1a/Il6st/H2-K1/H2-D1/Icosl/H2-T22/Hes1/Card11/H2-Q4/H2-Q6/Cd28/Ccr2/H2-Q7/Irgm1/H2-T23/Cd74/H2-DMb1/Ighm/Cd38/Igf2
GO:1904851	positive regulation of establishment of protein localization to telomere	10	0.853399	1.70923	0.00291259	0.00291259	0.0408069	2089	tags=80%, list=14%, signal=69%	Cct3/Cct6a/Cct2/Tcp1/Cct8/Cct7/Cct5/Dkc1
GO:0006839	mitochondrial transport	161	0.484593	1.53719	0.00291568	0.00291568	0.0408069	1862	tags=30%, list=13%, signal=27%	Bnip3/Timm13/Chchd4/Smdt1/Hsp90aa1/Hspd1/Pdcd5/Timm10/Hspa4/Kif5b/Vps35/Hif1a/Tomm40/Bcl2l1/Slc25a37/Mpc1/Mrpl18/Timm17a/Bax/Gclc/Abcb8/Bak1/Fxn/Tomm70a/Flvcr1/Dnlz/Spg7/Timm17b/Pam16/Slc25a4/Tmem14c/Timm23/Siva1/Grpel1/Chchd10/Samm50/Mpc2/Dnajc19/Gsk3b/Trp53/Vdac2/Slc25a13/Timm22/Vdac1/Tomm20/Bcl2/Maip1/Afg3l2/Rhot1
GO:0006094	gluconeogenesis	71	0.578003	1.62817	0.00292447	0.00292447	0.040818	1622	tags=30%, list=11%, signal=26%	Aldoc/Pgk1/Tpi1/Pgam1/Eno1/Gapdh/Sirt1/Pgp/Per2/Atf4/Gpi1/Hif1a/Nln/Ddb1/Acadm/Mdh2/Gpt2/Ppp4r3a/Slc25a13/Slc25a11/Ranbp2
GO:0002866	positive regulation of acute inflammatory response to antigenic stimulus	17	-0.84962	-1.71154	0.00296816	0.00296816	0.0413149	543	tags=53%, list=4%, signal=51%	Fcgr3/H2-K1/H2-D1/H2-T22/Fcgr1/H2-Q4/H2-Q6/H2-Q7/H2-T23
GO:0035821	modulation of process of another organism	12	0.845408	1.73638	0.00299922	0.00299922	0.041634	65	tags=17%, list=0%, signal=17%	Slpi/Cxcl1
GO:2001187	positive regulation of CD8-positive, alpha-beta T cell activation	16	-0.853297	-1.68786	0.00303023	0.00303023	0.0419503	407	tags=56%, list=3%, signal=55%	Runx3/H2-Q10/H2-K1/H2-D1/H2-T22/H2-Q4/H2-Q6/H2-Q7/H2-T23
GO:0009185	ribonucleoside diphosphate metabolic process	107	0.532611	1.60413	0.00308037	0.00308037	0.0425293	803	tags=16%, list=5%, signal=15%	Aldoc/Pgk1/Pkm/Aldoa/Tpi1/Ampd3/Pfkl/Pgam1/Nupr1/Eno1/Gapdh/Myc/Pfkp/Gpi1/Hif1a/Rrm1/Galk1
GO:0009306	protein secretion	307	0.393324	1.34204	0.00317854	0.00317854	0.0436487	1644	tags=20%, list=11%, signal=18%	Ifnb1/Cyp51/Tnf/Pfkl/Rab11fip1/Mmp13/Kcnn4/Anxa1/Comp/Sirt1/Il1rn/Stxbp5/M6pr/Lyst/Park7/Alox5/Rest/Sel1l/Dynll1/Rab8b/Myh9/Dnm1l/Adam9/Per2/Ccn3/Ap1s1/Ccdc186/Kif5b/Vps35/Gpr68/Ppia/Ptpmt1/Prkar1a/Hif1a/Rhbdf2/Stx4a/Uqcc2/Rab34/Bsg/Anxa7/Birc5/Eny2/Rbm4/Nr1h3/Oga/Steap3/Pafah1b1/Glud1/Rab3d/Anxa5/Clock/Mpc2/Hmgcr/Tmed2/Rsad2/Mttp/Tardbp/Ptpn11/Tlr2/Idh2/Ndufaf2
GO:0035592	establishment of protein localization to extracellular region	307	0.393324	1.34204	0.00317854	0.00317854	0.0436487	1644	tags=20%, list=11%, signal=18%	Ifnb1/Cyp51/Tnf/Pfkl/Rab11fip1/Mmp13/Kcnn4/Anxa1/Comp/Sirt1/Il1rn/Stxbp5/M6pr/Lyst/Park7/Alox5/Rest/Sel1l/Dynll1/Rab8b/Myh9/Dnm1l/Adam9/Per2/Ccn3/Ap1s1/Ccdc186/Kif5b/Vps35/Gpr68/Ppia/Ptpmt1/Prkar1a/Hif1a/Rhbdf2/Stx4a/Uqcc2/Rab34/Bsg/Anxa7/Birc5/Eny2/Rbm4/Nr1h3/Oga/Steap3/Pafah1b1/Glud1/Rab3d/Anxa5/Clock/Mpc2/Hmgcr/Tmed2/Rsad2/Mttp/Tardbp/Ptpn11/Tlr2/Idh2/Ndufaf2
GO:0032486	Rap protein signal transduction	14	0.805529	1.69989	0.00319525	0.00319525	0.043757	557	tags=36%, list=4%, signal=34%	Plk2/Rapgef2/Rap2b/Rap2a/Rapgef1
GO:0001836	release of cytochrome c from mitochondria	62	0.591248	1.63056	0.00320356	0.00320356	0.043757	1698	tags=31%, list=12%, signal=27%	Bnip3/Bbc3/Fam162a/Higd1a/Lmna/Prelid1/Pdcd5/Sod2/Dnm1l/Bcl2l1/Bax/Atp7a/Bak1/Fxn/Psmd10/Sfn/Trp53/Pycard/Bcl2
GO:0006626	protein targeting to mitochondrion	70	0.585664	1.6524	0.0032234	0.0032234	0.0439106	1656	tags=31%, list=11%, signal=28%	Timm13/Chchd4/Bag3/Hsp90aa1/Hspd1/Pdcd5/Timm10/Timm8a1/Hspa4/Tomm40/Timm17a/Pmpca/Tomm70a/Dnlz/Timm17b/Pam16/Timm23/Grpel1/Samm50/Dnajc19/Timm22/Tomm20
GO:0007159	leukocyte cell-cell adhesion	349	-0.486328	-1.44886	0.00324115	0.00324115	0.044035	1404	tags=22%, list=10%, signal=20%	H2-Q10/Cd37/Laptm5/Itch/Mad1l1/Smarcc2/Bmi1/Gcnt1/Sema4d/Zbtb1/Cd274/Syk/Il15/Sash3/Cx3cr1/Itga4/Casp3/Lgals9/Cd47/Gstp1/Tgfbr2/Arid1a/Sirpb1a/Tnfrsf21/Tnfaip8l2/Zbtb7b/Nfkbid/B2m/Stat5b/Dusp22/Sox4/Rac2/Il4ra/Bcl6/F11r/Hlx/Selplg/Il6st/Stk10/St3gal4/Cebpb/Rara/H2-K1/H2-D1/Pla2g2d/Icosl/Fgl2/Ptafr/Cd83/H2-T22/Hes1/Rhoh/Thbs1/Irf1/Gm5150/Cd300a/Card11/Sirpb1c/H2-Q4/H2-Q6/Cd28/Ccr2/H2-Q7/Irgm1/Sirp…
GO:0050432	catecholamine secretion	41	-0.728318	-1.66319	0.00325888	0.00325888	0.0441584	1713	tags=22%, list=12%, signal=19%	Rab3a/Gabbr1/Sncg/Pink1/P2ry12/Grk2/Ptgs1/Cxcl12/Agtr2
GO:0030198	extracellular matrix organization	258	-0.508324	-1.47075	0.00330758	0.00330758	0.0445356	1214	tags=16%, list=8%, signal=14%	Pparg/Mmp19/Smpd3/Lamc1/Colgalt1/Clasp2/Ddr2/Aebp1/Ctss/Col14a1/Gpm6b/Lama2/Idua/Eng/Cst3/Tnfrsf1a/Lamb1/Adamts1/Dpt/Hspg2/Col5a3/Antxr1/Notch1/Bcl3/Mmp2/Col18a1/Smoc2/Col15a1/Tgfbr3/Nid1/Adamts12/Pdgfra/Ltbp4/Col4a1/Col4a2/Cav1/Tnxb/Ramp2/Adamts4/Myh11
GO:0045229	external encapsulating structure organization	258	-0.508324	-1.47075	0.00330758	0.00330758	0.0445356	1214	tags=16%, list=8%, signal=14%	Pparg/Mmp19/Smpd3/Lamc1/Colgalt1/Clasp2/Ddr2/Aebp1/Ctss/Col14a1/Gpm6b/Lama2/Idua/Eng/Cst3/Tnfrsf1a/Lamb1/Adamts1/Dpt/Hspg2/Col5a3/Antxr1/Notch1/Bcl3/Mmp2/Col18a1/Smoc2/Col15a1/Tgfbr3/Nid1/Adamts12/Pdgfra/Ltbp4/Col4a1/Col4a2/Cav1/Tnxb/Ramp2/Adamts4/Myh11
GO:0032515	negative regulation of phosphoprotein phosphatase activity	14	0.804549	1.69782	0.00331286	0.00331286	0.0445356	2044	tags=57%, list=14%, signal=49%	Tnf/Ppp1r15a/Ppp1r11/Rock2/Mastl/Ptpa/Rock1/Nckap1l
GO:0002753	cytoplasmic pattern recognition receptor signaling pathway	159	-0.574932	-1.58027	0.00335006	0.00335006	0.0448775	783	tags=23%, list=5%, signal=22%	Gramd4/Itch/Tifa/Ifi214/Oas1a/Sec14l1/Pum2/Mefv/Trim11/Pcbp2/Eif2ak2/Cgas/Trim25/Tlr7/Myd88/Irf2/Dhx58/Igtp/Irgm2/Ifi204/Unc93b1/Trim30a/Gbp2/Irf1/Ifi203/Ddx60/Mndal/Irgm1/Ifi211/Scimp/Ifi209/Oas1g/Cav1/Irf7/Oas3/Ifi206/Ifi213
GO:1901342	regulation of vasculature development	256	-0.519632	-1.50297	0.00335587	0.00335587	0.0448775	1214	tags=20%, list=8%, signal=19%	Pparg/Cd40/Flcn/Nrp1/Ccl11/C3ar1/Ccm2/Cx3cr1/Pxn/Dab2ip/Tcf4/Rhoj/Tgfbr2/Amot/Sh2b3/Hhex/Eng/Stat3/Rhob/Acvrl1/Tnfrsf1a/Adamts1/Ccl24/Ctsh/Btg1/Dcn/Klf2/Nfe2l2/Foxj2/Pik3cd/Sema4a/Vegfa/Jup/Pml/Kdr/Smoc2/Thbs1/Cxcr4/Stat1/Sp100/Ccr2/Cxcl12/Col4a2/Flt1/Ramp2/Igf2/Cd34/Cldn5/Aplnr/Aqp1/Cdh5
GO:0006518	peptide metabolic process	724	0.335637	1.24085	0.00336681	0.00336681	0.0449063	2542	tags=29%, list=17%, signal=25%	Cpd/Pkm/Tnf/Ptrh1/Ppp1r15a/Cpeb4/Bdh2/Gapdh/Mrpl41/Gclm/Hsp90b1/Gspt1/Mrps6/Nat10/Larp4/Mrps28/Sec11c/Eif3b/Cln5/Park7/Mrpl20/Mrpl54/Ncbp2/Syncrip/Sod2/Calr/Mrpl12/Dapk1/Lrpprc/Dhx29/Mrpl51/Per2/Aph1b/Bin1/Mrps12/Eif3a/Abce1/Dnajc3/Eif4g2/Srp9/Mrpl14/Mrps10/Eif4ebp1/Usp16/Gadd45gip1/Mrps14/C1qbp/Caprin2/Eif2s1/Eif4g1/Mrpl34/Eif5a/Uqcc2/Gsap/Nln/Hmgn5/Mrpl57/Mrpl43/Aurkaip1/Spcs3/Mrps15/Dap3/Coa3/…
GO:0006270	DNA replication initiation	30	0.703798	1.69998	0.00343071	0.00343071	0.0455473	2174	tags=43%, list=15%, signal=37%	Mcm5/Mcm2/Mcm3/Mcm7/Mcm4/Orc2/Mcm6/Cdt1/Pola1/Topbp1/Mcm10/Prim1/Orc4
GO:0046641	positive regulation of alpha-beta T cell proliferation	34	-0.765771	-1.71492	0.00343271	0.00343271	0.0455473	407	tags=35%, list=3%, signal=34%	Tgfbr2/H2-K1/H2-D1/H2-T22/Card11/H2-Q4/H2-Q6/Cd28/Ccr2/H2-Q7/Irgm1/H2-T23
GO:1903825	organic acid transmembrane transport	100	0.529195	1.58726	0.003455	0.003455	0.0456062	1173	tags=23%, list=8%, signal=21%	Slc16a3/Slc22a4/Tnf/Slc13a3/Slc6a8/Abcc1/Slc2a1/Slc38a1/Myc/Slc27a1/Acsl1/Abcd4/Per2/Slc7a1/Cd36/Slc7a8/Itgb1/Mpc1/Slc23a2/Slc7a5/Slc7a11/Lrrc8d/Lrrc8b
GO:1905039	carboxylic acid transmembrane transport	100	0.529195	1.58726	0.003455	0.003455	0.0456062	1173	tags=23%, list=8%, signal=21%	Slc16a3/Slc22a4/Tnf/Slc13a3/Slc6a8/Abcc1/Slc2a1/Slc38a1/Myc/Slc27a1/Acsl1/Abcd4/Per2/Slc7a1/Cd36/Slc7a8/Itgb1/Mpc1/Slc23a2/Slc7a5/Slc7a11/Lrrc8d/Lrrc8b
GO:0050678	regulation of epithelial cell proliferation	325	-0.501587	-1.48704	0.00350643	0.00350643	0.0460982	1291	tags=17%, list=9%, signal=16%	Glul/Cdh13/Nfatc1/Sema5a/Pparg/Flcn/Ednra/Fzd7/Ccl11/Kdm5b/Nr1d1/Itga4/Dab2ip/Stk4/Egfr/Ccnd2/Ang/Klf9/Eng/Mef2c/Stat3/B2m/Acvrl1/Ccl24/Cdkn1b/Hlx/Hspg2/Zfas1/Nr4a1/Notch2/Pik3cd/Vegfa/Zfp36/Notch1/Tcf7l2/Cdkn1c/Kdr/Col18a1/Zeb1/Hes1/Thbs1/Stat1/Tgfbr3/Apoe/Cxcl12/Nfib/Gas1/Flt1/Cav1/Lama5/Igf2/Egfl7/Aplnr/Dlk1
GO:1900078	positive regulation of cellular response to insulin stimulus	31	-0.752796	-1.64621	0.00351032	0.00351032	0.0460982	645	tags=23%, list=4%, signal=22%	Adipor1/Zbtb7b/Snx5/Sorl1/Marcks/Igf2/C1qtnf9
GO:0051301	cell division	538	0.355479	1.28529	0.00355006	0.00355006	0.0465005	2618	tags=28%, list=18%, signal=24%	Dyrk3/Ccnf/Plec/Hells/Diaph3/Spire1/Rala/Myc/Exoc5/Stmn1/Ran/Pdgfa/Ahctf1/Kif2a/Calm3/Spdl1/Myh9/Nup62/Cib1/Spc24/Gipc1/Rhoc/Lig1/Htr2b/Chmp2b/Cdk6/Arl8b/Cks1b/Pkp4/Ralb/Ccnd1/Usp16/Dctn3/Bcl2l1/Cdk14/Kmt5a/Gnai3/Ncapg2/Calm1/Cenpx/Ybx1/Cenps/Ccnb2/Mapre1/Birc5/Nsun2/Top1/Nek6/Exoc6b/Cfl1/Prpf40a/Pdcd6ip/Pdgfb/Sde2/Ccdc124/Pafah1b1/Plk3/Ext1/Rab10/Epb41l2/Pstpip1/Smc3/Gnl3/Pgf/Ctdp1/Syce2/Anapc15…
GO:1901292	nucleoside phosphate catabolic process	147	0.487985	1.52745	0.00358297	0.00358297	0.0468115	1571	tags=21%, list=11%, signal=19%	Aldoc/Pgk1/Pkm/Aldoa/Tpi1/Ampd3/Pfkl/Pgam1/Nupr1/Eno1/Gapdh/Myc/Vcp/Pfkp/Dera/Dut/Gpi1/Hif1a/Itpa/Galk1/Dnph1/Eif6/Nudt3/Acot7/Hdac4/Hk3/Htr2a/Xdh/Nudt5/Hint1/Hk1
GO:0033108	mitochondrial respiratory chain complex assembly	86	0.548606	1.59375	0.00364909	0.00364909	0.0475539	3213	tags=47%, list=22%, signal=37%	Chchd4/Ndufab1/Chchd7/Ndufb8/Ndufb9/Ndufb10/Ndufb6/Ndufs5/Uqcc2/Tmem126a/Ndufc1/Coa3/Ndufa8/Ndufs8/Ndufs7/Ndufb7/Samm50/Ndufs6/Ndufb2/Ndufb5/Ndufaf2/Cox18/Ndufs1/Ndufb11/Ndufaf4/Sdhaf3/Ndufs4/Lyrm2/Ndufaf7/Sco2/Ndufc2/Fastkd3/Ndufa11/Ndufa9/Ndufa10/Cox19/Ndufb3/Ndufa12/Ndufa1/Cox14
GO:0019319	hexose biosynthetic process	74	0.563442	1.60416	0.00372125	0.00372125	0.0483389	1622	tags=28%, list=11%, signal=25%	Aldoc/Pgk1/Tpi1/Pgam1/Eno1/Gapdh/Sirt1/Pgp/Per2/Atf4/Gpi1/Hif1a/Nln/Ddb1/Acadm/Mdh2/Gpt2/Ppp4r3a/Slc25a13/Slc25a11/Ranbp2
GO:0030155	regulation of cell adhesion	673	-0.434818	-1.35069	0.00373238	0.00373238	0.0483389	1404	tags=18%, list=10%, signal=17%	H2-Q10/Cd37/Laptm5/Itch/Mad1l1/Smarcc2/Cytip/Bmi1/Triobp/Gcnt1/Cdh13/Sema4d/Sema5a/Epha3/Akna/Zbtb1/Flcn/Nrp1/Cd274/Syk/Lamc1/Fzd7/Il15/Sash3/Rin2/P2ry12/Itga4/Fermt2/Il6ra/Casp3/Clasp2/Lama4/Serpine2/Lgals9/Lpxn/Cd47/Gstp1/Tgfbr2/Arid1a/Stk4/Gcnt2/Sh2b3/Sirpb1a/Taok2/Gpm6b/Tnfrsf21/Tnfaip8l2/Lama2/Zbtb7b/Nfkbid/B2m/Acvrl1/C1qtnf1/Nedd9/Lamb1/Stat5b/Dusp22/Sox4/Rac2/Il4ra/Bcl6/F11r/Hlx/Hspg2/Il6s…
GO:0002221	pattern recognition receptor signaling pathway	237	-0.516353	-1.47967	0.00373772	0.00373772	0.0483389	1399	tags=22%, list=9%, signal=20%	Gramd4/Itch/Tifa/Ifi214/Oas1a/Rab11fip2/Sec14l1/Cd274/Ticam2/Pum2/Nr1d1/Mefv/Trim11/Nmi/Dab2ip/Pcbp2/Ifi35/Eif2ak2/Cgas/Trim25/Tlr7/Cd14/Myd88/Irak2/Irf2/Dhx58/Igtp/Tlr1/Irgm2/Ly96/Ifi204/Unc93b1/Trim30a/Gbp2/Irf1/Cd300a/Ifi203/Ddx60/Tifab/Mndal/Irgm1/Tlr12/Ifi211/Scimp/Ifi209/Oas1g/Cav1/Irf7/Oas3/Ifi206/Ifi213
GO:0085029	extracellular matrix assembly	44	-0.723318	-1.67808	0.00378351	0.00378351	0.0488075	1449	tags=36%, list=10%, signal=33%	Lamb2/Pxdn/Phldb2/Tie1/Pparg/Smpd3/Clasp2/Gpm6b/Lamb1/Antxr1/Notch1/Tgfbr3/Ltbp4/Tnxb/Ramp2/Myh11
GO:0036037	CD8-positive, alpha-beta T cell activation	35	-0.749069	-1.68178	0.0038152	0.0038152	0.0490252	637	tags=37%, list=4%, signal=36%	Runx3/H2-Q10/Cd274/Zbtb7b/Igtp/H2-K1/H2-D1/H2-T22/Irf1/H2-Q4/H2-Q6/H2-Q7/H2-T23
GO:0007007	inner mitochondrial membrane organization	36	0.663817	1.63254	0.00381958	0.00381958	0.0490252	2140	tags=50%, list=15%, signal=43%	Chchd6/Myc/Timm13/Immt/Timm10/Dnajc11/Bax/Tomm70a/Afg3l1/Micos13/Chchd10/Samm50/Timm22/Cox18/Maip1/Afg3l2/Chchd3/Tmem11
GO:0030705	cytoskeleton-dependent intracellular transport	169	0.465115	1.47811	0.00387416	0.00387416	0.0496012	3249	tags=34%, list=22%, signal=27%	Tuba1a/Ift20/Dst/Dynll1/Arl8b/Ccdc186/Kif5b/Arhgap21/Bicd2/Sfpq/Fbxw11/Hif1a/Hsbp1/Hook3/Ssx2ip/Rab21/Spg7/Pafah1b1/Vamp7/Spast/Arl3/Borcs8/Myo10/App/Borcs7/Ssna1/Kif3b/Rhot1/Stau2/Cdc42/Kif3a/Ift46/Ift27/Arl8a/Ap3m1/Actn4/Actr10/Rab1a/Tanc2/Ift43/Dync1i2/Ift52/Trak2/Bloc1s2/Cluap1/Dync1h1/Cep131/Kif1b/Ccdc88b/Fnbp1l/Flot2/Dtnbp1/Mgarp/Kif1c/Ift122/Hnrnpu/Kif1a
GO:0007512	adult heart development	10	-0.881942	-1.66888	0.00389665	0.00389665	0.0496567	10	tags=20%, list=0%, signal=20%	Asxl2/Aplnr
GO:0007006	mitochondrial membrane organization	103	0.529524	1.58693	0.00389794	0.00389794	0.0496567	1971	tags=34%, list=13%, signal=30%	Bnip3/Chchd6/Myc/Timm13/Hsp90aa1/Pdcd5/Immt/Timm10/Hspa4/Dnajc11/Tomm40/Bcl2l1/Bax/Gclc/Bak1/Fxn/Tomm70a/Spg7/Slc25a4/Afg3l1/Micos13/Siva1/Chchd10/Samm50/Gsk3b/Trp53/Vdac2/Timm22/Cox18/Bcl2/Maip1/Afg3l2/Rhot1/Mul1/Chchd3
GO:0060338	regulation of type I interferon-mediated signaling pathway	37	-0.745369	-1.68932	0.00391305	0.00391305	0.0497251	595	tags=22%, list=4%, signal=21%	Adar/Samhd1/Nlrc5/Stat2/Zbp1/Oas1g/Irf7/Oas3
GO:0090189	regulation of branching involved in ureteric bud morphogenesis	15	-0.851531	-1.67488	0.00393327	0.00393327	0.0498581	375	tags=27%, list=3%, signal=26%	Smo/Six1/Vegfa/Agtr2
GO:0014061	regulation of norepinephrine secretion	11	-0.880061	-1.68144	0.00394359	0.00394359	0.0498651	1108	tags=27%, list=8%, signal=25%	P2ry12/Ptgs1/Agtr2
GO:0042098	T cell proliferation	212	-0.53833	-1.52826	0.00395927	0.00395927	0.0499398	1448	tags=23%, list=10%, signal=21%	P2rx7/Tnfrsf1b/H2-Q10/Cd37/Laptm5/Itch/Slc11a1/Mad1l1/Bmi1/Cd274/Syk/Il15/Sash3/Casp3/Lgals9/Tgfbr2/Tnfrsf21/Ifnar2/Elf4/Zbtb7b/Stat5b/Rac2/Bcl6/Il6st/Cebpb/H2-K1/H2-D1/Pla2g2d/Ebi3/Icosl/H2-T22/Hes1/Cxcr4/Irf1/Card11/H2-Q4/H2-Q6/Cd28/Ccr2/H2-Q7/Irgm1/H2-T23/Cxcl12/H2-DMb1/H2-Aa/Slfn1/Clec2i/Igf2
GO:0050433	regulation of catecholamine secretion	34	-0.7631	-1.70893	0.00399956	0.00399956	0.0503238	1713	tags=26%, list=12%, signal=23%	Rab3a/Gabbr1/Sncg/Pink1/P2ry12/Grk2/Ptgs1/Cxcl12/Agtr2
GO:0060977	coronary vasculature morphogenesis	26	-0.782393	-1.68457	0.00402416	0.00402416	0.0505088	375	tags=23%, list=3%, signal=23%	Nrp1/Vegfa/Notch1/Tgfbr3/Pdgfrb/Ace
GO:0170043	non-proteinogenic amino acid biosynthetic process	12	0.837505	1.72015	0.00413694	0.00413694	0.0516999	389	tags=25%, list=3%, signal=24%	Atp2b4/Slc38a1/Park7
GO:0048813	dendrite morphogenesis	157	0.460876	1.4587	0.004146	0.004146	0.0516999	1269	tags=14%, list=9%, signal=13%	Cdk5r1/Arc/Lrp8/Baiap2/Abl2/Pdlim5/Rapgef2/Dnm1l/Rap2a/Ywhah/Dock10/Cux1/Nedd4l/Caprin2/Itgb1/Caprin1/Atp7a/Dbnl/Rab21/Cfl1/Pafah1b1/Vamp7
GO:0044092	negative regulation of molecular function	685	-0.42638	-1.32393	0.00414942	0.00414942	0.0516999	956	tags=11%, list=6%, signal=11%	Palm/Oxa1l/Setd7/Pot1a/Pot1b/Gstp1/Rrad/Eif4a2/Zfp90/Amot/Rasip1/Kat6a/Pim1/Hhex/Pkib/Eng/Fbxo7/Cst3/Pkig/Nfkbid/Nosip/B2m/Cnrip1/Adar/Mitd1/Trib1/Naip5/Dusp22/Irak2/Cdkn1a/Cdkn1b/Cmklr1/Tut4/Zfas1/Pbx1/Cdkn2d/Sik1/Ddit3/Nr4a1/Vegfa/Serping1/P2ry13/Zfp36/Notch1/Ifi204/Tcf7l2/Cdkn1c/Wwtr1/Dtx3l/Pml/Bcl3/Hes1/Parp9/Id3/Thbs1/Nlrc5/Cd300a/Ifi203/Gpr35/Sp100/Midn/Mndal/Ifi211/Apoe/Ifi209/Nfib/Ifit2/C…
GO:0050930	induction of positive chemotaxis	13	-0.863234	-1.67038	0.00419734	0.00419734	0.0521688	375	tags=23%, list=3%, signal=23%	Vegfa/Cxcl12/Il16
GO:0032467	positive regulation of cytokinesis	31	0.690033	1.67281	0.00420747	0.00420747	0.0521688	3484	tags=58%, list=24%, signal=44%	Nup62/Gipc1/Pkp4/Birc5/Spast/Kif3b/Cdc42/Cul3/Cdca8/Cdc14a/Wnk1/Igf1r/Rhoa/Poldip2/Cdc6/Kif23/Pkn2/Kif20b
GO:0046605	regulation of centrosome cycle	52	0.618191	1.65635	0.0042869	0.0042869	0.0529812	2254	tags=33%, list=15%, signal=28%	Ccnf/Plk2/Sirt1/Nat10/Nup62/Chmp2b/Ccnl1/Azin1/Pdcd6ip/Cdk5rap2/Npm1/Dync1li1/Rock2/Xpo1/Chmp2a/Nubp1/Ppp1r35
GO:0045943	positive regulation of transcription by RNA polymerase I	31	0.689665	1.67191	0.00429378	0.00429378	0.0529812	1497	tags=35%, list=10%, signal=32%	Ppp1r15a/Ercc6/Atf4/Smarca4/Ncl/Lyar/Utp15/Ddx21/Wdr43/Mybbp1a/Nol11
GO:0015874	norepinephrine transport	17	-0.839833	-1.69183	0.00431044	0.00431044	0.0529812	1108	tags=24%, list=8%, signal=22%	P2ry12/Slc29a3/Ptgs1/Agtr2
GO:0031342	negative regulation of cell killing	34	-0.759729	-1.70139	0.00431448	0.00431448	0.0529812	1404	tags=41%, list=10%, signal=37%	H2-Q10/Clec2d/Cx3cr1/Lgals9/Tap2/H2-K1/H2-D1/Tap1/H2-T22/H2-Q4/H2-Q6/H2-Q7/H2-T23/Igf2
GO:0022407	regulation of cell-cell adhesion	412	-0.464846	-1.39864	0.00432964	0.00432964	0.0530399	1404	tags=20%, list=10%, signal=19%	H2-Q10/Cd37/Laptm5/Itch/Mad1l1/Smarcc2/Bmi1/Gcnt1/Akna/Zbtb1/Cd274/Syk/Il15/Sash3/Itga4/Il6ra/Casp3/Serpine2/Lgals9/Cd47/Gstp1/Tgfbr2/Arid1a/Gcnt2/Sh2b3/Sirpb1a/Taok2/Tnfrsf21/Tnfaip8l2/Zbtb7b/Nfkbid/B2m/C1qtnf1/Stat5b/Dusp22/Sox4/Il4ra/Bcl6/F11r/Hlx/Il6st/St3gal4/Cebpb/Rara/H2-K1/H2-D1/Vegfa/Pla2g2d/Notch1/Icosl/Adam19/Fgl2/Ptafr/Cd83/H2-T22/Hes1/Rhoh/Irf1/Gm5150/Ccr5/Cd300a/Card11/Sirpb1c/H2-Q4…
GO:0046364	monosaccharide biosynthetic process	79	0.565021	1.62724	0.00435214	0.00435214	0.0531879	1622	tags=28%, list=11%, signal=25%	Aldoc/Pgk1/Tpi1/Pgam1/Eno1/Gapdh/Sirt1/Pgd/Pgp/Per2/Atf4/Gpi1/Hif1a/Nln/Ddb1/Acadm/Mdh2/Gpt2/Ppp4r3a/Slc25a13/Slc25a11/Ranbp2
GO:0150077	regulation of neuroinflammatory response	26	0.722869	1.69461	0.00437461	0.00437461	0.053335	847	tags=23%, list=6%, signal=22%	Ifnb1/Nupr1/Kcnn4/Ldlr/Hspa4/Syt11
GO:0015844	monoamine transport	59	-0.66349	-1.59972	0.00440052	0.00440052	0.0535231	1713	tags=25%, list=12%, signal=23%	Rab3a/Gabbr1/Sncg/Pink1/Smpd3/Syk/P2ry12/Slc29a3/Grk2/Gpm6b/Ptgs1/Fcgr3/Cd300a/Cxcl12/Agtr2
GO:0003096	renal sodium ion transport	10	0.840186	1.68277	0.0045	0.0045	0.0545228	388	tags=20%, list=3%, signal=19%	Edn1/Oxsr1
GO:1901615	organic hydroxy compound metabolic process	360	0.38134	1.31221	0.00450406	0.00450406	0.0545228	1698	tags=19%, list=12%, signal=17%	Dhcr24/Sqle/Fdps/Idi1/Ch25h/Dhrs9/Cyp51/Tpi1/Tnf/Apobr/Msmo1/Ldha/Mvd/Wnt4/Itgam/Rapgef2/Sirt1/Srebf2/Hmgcs1/Ldlr/Park7/Pmvk/Pgp/Rest/Nus1/Pmp22/Adh5/Myh9/Stard4/Ddt/Insig1/Hdlbp/Gipc1/Nfkb1/Cyb5r3/Per2/Fdft1/Fdx1/Slc5a3/Vps35/Hif1a/Galk1/Por/Chka/Nfe2l1/Atp7a/Ldlrap1/Impa1/Gch1/Slc7a11/Nudt3/Lima1/Slc16a10/Dab2/Ctsl/Spr/Qdpr/Hmgcr/Hsd17b7/Trp53/Mttp/Glo1/Ebpl/Idh2/Npy/App/Mvk/Dhfr/Bcl2
GO:0001656	metanephros development	55	-0.687258	-1.6417	0.00456231	0.00456231	0.0550974	507	tags=15%, list=3%, signal=14%	Aph1c/Wwtr1/Hes1/Id3/Pdgfrb/Pdgfra/Aqp1/Agtr2
GO:0099072	regulation of postsynaptic membrane neurotransmitter receptor levels	101	0.52461	1.56883	0.00462	0.00462	0.0556625	1601	tags=21%, list=11%, signal=19%	Arc/Rala/Stx3/Ap2s1/Gripap1/Hras/Hsp90aa1/Rap2a/Ppfia1/Vps35/Stx4a/Itgb1/Snx6/Eps8/Ywhae/Sacm1l/Zdhhc5/Scrib/Gsk3b/Rab11a/Ap2m1
GO:0001961	positive regulation of cytokine-mediated signaling pathway	52	-0.698072	-1.65762	0.00468226	0.00468226	0.0562799	443	tags=25%, list=3%, signal=24%	Crebrf/Parp14/Igtp/Irgm2/Parp9/Cxcr4/Nlrc5/Irgm1/Axl/Cd74/Zbp1/Tslp/Irf7
GO:0032823	regulation of natural killer cell differentiation	14	-0.857008	-1.67884	0.00469903	0.00469903	0.0563488	1206	tags=50%, list=8%, signal=46%	Zbtb1/Flt3l/Il15/Lgals9/Stat5b/Irf1/Axl
GO:0043086	negative regulation of catalytic activity	411	-0.465157	-1.40094	0.00475223	0.00475223	0.0568533	1056	tags=13%, list=7%, signal=13%	Casp3/Dab2ip/Tfap4/Serpine2/Palm/Oxa1l/Setd7/Pot1a/Pot1b/Gstp1/Eif4a2/Amot/Rasip1/Hhex/Pkib/Eng/Fbxo7/Cst3/Pkig/Nosip/Adar/Trib1/Naip5/Dusp22/Cdkn1a/Cdkn1b/Cdkn2d/Nr4a1/Vegfa/Serping1/P2ry13/Zfp36/Notch1/Ifi204/Cdkn1c/Wwtr1/Dtx3l/Pml/Parp9/Thbs1/Cd300a/Ifi203/Midn/Mndal/Ifi211/Apoe/Ifi209/Cav1/Apoc1/Ifi206/Ifi213/Spry4/Ptprb/Itih5/Aqp1
GO:0048592	eye morphogenesis	123	-0.580161	-1.55306	0.00479375	0.00479375	0.0572161	861	tags=12%, list=6%, signal=12%	Arid1a/Casp6/Ikzf1/Stat3/Mfap2/Sox4/Notch2/Vegfa/Notch1/Kdr/Zeb1/Rpgrip1/Gas1/Flt1/Aqp1
GO:0045333	cellular respiration	195	0.436567	1.41392	0.00486546	0.00486546	0.0579366	2798	tags=41%, list=19%, signal=33%	Bnip3/Tnf/Plec/Nupr1/Myc/Vcp/Chchd4/Prelid1/Ndufab1/Park7/Sod2/Cox5a/Ndufb8/Coq7/Ndufb9/Hif1a/Gadd45gip1/Ndufb10/Ndufb6/Ndufs5/Uqcc2/Ndufc1/Mtln/Bax/Atp7a/Ndufa8/Stoml2/Fxn/Shmt2/Ndufs8/Etfb/Cox4i1/Uqcrq/Chchd2/Pik3ca/Ndufs7/Ndufb7/Chchd10/Uqcr11/Ndufv2/Mdh2/Mybbp1a/Cox7b/Cisd1/Cs/Ndufs6/Slc25a13/Ndufb2/Fh1/Ndufb5/Idh2/Ndufs1/Ndufb11/Ndufs4/Opn3/Suclg1/Iscu/Slc25a25/Sco2/Dlst/Ndufc2/Mdh1/Afg1l/Sd…
GO:0072243	metanephric nephron epithelium development	13	-0.860232	-1.66457	0.00490276	0.00490276	0.0581704	304	tags=31%, list=2%, signal=30%	Lamb2/Wwtr1/Hes1/Aqp1
GO:0090190	positive regulation of branching involved in ureteric bud morphogenesis	14	-0.855331	-1.67555	0.00490787	0.00490787	0.0581704	375	tags=29%, list=3%, signal=28%	Smo/Six1/Vegfa/Agtr2
GO:1903037	regulation of leukocyte cell-cell adhesion	319	-0.487756	-1.44214	0.00494704	0.00494704	0.058499	1404	tags=22%, list=10%, signal=20%	H2-Q10/Cd37/Laptm5/Itch/Mad1l1/Smarcc2/Bmi1/Gcnt1/Zbtb1/Cd274/Syk/Il15/Sash3/Itga4/Casp3/Lgals9/Cd47/Gstp1/Tgfbr2/Arid1a/Sirpb1a/Tnfrsf21/Tnfaip8l2/Zbtb7b/Nfkbid/B2m/Stat5b/Dusp22/Sox4/Il4ra/Bcl6/Hlx/Il6st/St3gal4/Cebpb/Rara/H2-K1/H2-D1/Pla2g2d/Icosl/Fgl2/Ptafr/Cd83/H2-T22/Hes1/Rhoh/Irf1/Gm5150/Cd300a/Card11/Sirpb1c/H2-Q4/H2-Q6/Cd28/Ccr2/H2-Q7/Irgm1/Sirpb1b/H2-T23/H2-DMa/Cd74/Cxcl12/H2-Eb1/H2-DMb…
GO:0007018	microtubule-based movement	269	0.390356	1.32758	0.00499917	0.00499917	0.058904	3249	tags=29%, list=22%, signal=23%	Atp2b4/Tuba1a/Kif2a/Ift20/Dst/Dynll1/Arl8b/Kif5b/Arhgap21/Bicd2/Sfpq/Fbxw11/Hif1a/Hsbp1/Ssx2ip/Rab21/Spg7/Pafah1b1/Vps13a/Dynlrb1/Anxa5/Vamp7/Ttll5/Spast/Arl3/Dync1li1/Borcs8/App/Adcy3/Borcs7/Ssna1/Kifc3/Vdac3/Kif3b/Rhot1/Stau2/Cdc42/Kif3a/Ift46/Ttll3/Kif21b/Dnaaf2/Map4/Ift27/Arl8a/Insl6/Cfap298/Ap3m1/Actr10/Rab1a/Kif16b/Ift43/Stard7/Kpnb1/Dync1li2/Dync1i2/Ift52/Trak2/Bloc1s2/Cluap1/Dnah17/Dync1h…
GO:0071826	protein-RNA complex organization	174	0.448213	1.42989	0.00500435	0.00500435	0.058904	2893	tags=37%, list=20%, signal=30%	Dyrk3/Rrs1/Vcp/Lsm4/Mrpl20/Hsp90aa1/Dhx29/Bop1/Eif3a/Kif5b/Mrto4/Gcfc2/Srsf1/Snrpd1/Srsf10/Eif6/Prpf39/Srpk2/Dhx9/Ptges3/Rrp7a/Nufip1/Denr/Strap/Brix1/Rps5/Tarbp2/Srpk1/Cdc73/Rplp0/Puf60/Lsm2/Smn1/Ddx46/Rps27l/Mrps7/Snrpb/Rbmx/Ruvbl2/Aar2/Snrpd3/U2af2/Rpl11/Znhit6/Scaf11/Ncbp1/Prpf31/Rpf2/Rpsa/Usp39/Eif5/Gemin7/Mdn1/Prmt7/Ptbp2/Rps6/Prmt5/Usp4/Srsf6/Rps19/Ppan/Snrpd2/Nop2/Ddx42
GO:0002758	innate immune response-activating signaling pathway	243	-0.51446	-1.4808	0.00502424	0.00502424	0.0589426	1399	tags=21%, list=9%, signal=20%	Gramd4/Itch/Tifa/Ifi214/Oas1a/Rab11fip2/Sec14l1/Cd274/Syk/Ticam2/Pum2/Nr1d1/Mefv/Trim11/Nmi/Dab2ip/Pcbp2/Ifi35/Eif2ak2/Cgas/Trim25/Tlr7/Cd14/Myd88/Irak2/Irf2/Dhx58/Igtp/Tlr1/Irgm2/Ly96/Ifi204/Unc93b1/Trim30a/Gbp2/Irf1/Cd300a/Ifi203/Ddx60/Tifab/Mndal/Irgm1/Tlr12/Ifi211/Scimp/Ifi209/Oas1g/Cav1/Irf7/Oas3/Ifi206/Ifi213
GO:0032870	cellular response to hormone stimulus	422	-0.46391	-1.39832	0.0050307	0.0050307	0.0589426	1659	tags=19%, list=11%, signal=18%	Insig2/Prcp/Bbs4/Ppard/Prkcd/Rbfox2/Inpp5k/Smyd3/Enpp1/Leprot/Akr1c13/Vps54/Prkaca/Kat2b/Zfp36l1/Sgcb/Foxo4/Abhd2/Epha3/Pparg/Rarg/Vamp2/Ednra/Trerf1/Nr1d1/C2cd5/Pxn/Tfap4/Ncoa3/Grk2/Usf1/Per1/Pip4k2a/Zfp36l2/Arid1a/Pck2/Ncoa2/Klf9/Peg13/P2ry6/Rarres2/Ep300/Thra/Mef2c/Insr/Adipor1/Zbtb7b/Stat3/Pdk2/Stat5b/Nfe2l2/Csk/Daxx/Snx5/Sorl1/Marcks/Crebrf/Agtrap/Rara/Nr4a1/Eif4ebp2/Ramp1/Zfp36/Notch1/Lpin1…
GO:0032835	glomerulus development	58	-0.674191	-1.62499	0.00508498	0.00508498	0.0593132	395	tags=21%, list=3%, signal=20%	Mef2c/Notch2/Notch1/Wwtr1/Hes1/Pdgfrb/Nid1/Pdgfra/Notch3/Heyl/Aqp1/Agtr2
GO:0021819	layer formation in cerebral cortex	13	0.800557	1.67321	0.00508556	0.00508556	0.0593132	24	tags=15%, list=0%, signal=15%	Cdk5r1/Lrp8
GO:0035864	response to potassium ion	12	-0.873538	-1.67833	0.00511671	0.00511671	0.0595406	329	tags=42%, list=2%, signal=41%	Dlg4/Nek7/Atp1a3/Mylk/Atp1a2
GO:1903047	mitotic cell cycle process	665	0.336654	1.23049	0.00514623	0.00514623	0.0597137	2824	tags=29%, list=19%, signal=25%	Edn1/Ccnf/Tnf/Plk2/Rrs1/Mki67/Rgcc/Anxa1/Mcm2/Tk1/Sirt1/Uhrf1/Mdm2/Myc/Pdpn/Naa50/Mcm3/Cacul1/Vcp/Exoc5/Stmn1/Ran/Ranbp1/Kif2a/Nbn/Pcna/Calm3/Adam17/Ube2a/Mcm4/Ankrd17/Nasp/Spdl1/Nup62/Brox/Spc24/Rhoc/Hspa2/Lig1/Chmp2b/Ywhah/Cdk6/Fam110a/Cks1b/Pebp1/Pinx1/Ccnd1/Fbxw11/Eif4ebp1/Eif4g1/Mcm6/Cdk14/Itgb1/Ncapg2/Rrm1/Smarca4/Cdt1/Eps8/Calm1/Actl6a/Ccnb2/Nfe2l1/Anp32b/E2f1/Mapre1/Birc5/Ezh2/Nek6/Exoc6b…
GO:0090288	negative regulation of cellular response to growth factor stimulus	85	-0.623492	-1.57014	0.00515497	0.00515497	0.0597137	1230	tags=20%, list=8%, signal=18%	Htra3/Pparg/Gdf3/Dab2ip/Hhex/Gpr155/Dcn/Sorl1/Bambi/Notch1/Tcf7l2/Thbs1/Nbl1/Adamts12/Cav1/Spry4/Agtr2
GO:0140694	non-membrane-bounded organelle assembly	377	0.369324	1.27979	0.00517376	0.00517376	0.0597958	1851	tags=18%, list=13%, signal=16%	Sqle/Edn1/Tnf/Plec/Plk2/Diaph3/Rrs1/Cflar/Uhrf1/Lsm4/Kif2a/Mrpl20/Lcp1/Tnnt1/Gsn/G3bp1/Nup62/Dhx29/Ezr/Chmp2b/Bop1/Actg1/Prkar1a/C1qbp/Eif2s1/Mrto4/Itgb1/Noct/Wdr1/Tnnt2/Usp10/Cenpx/Csrp1/Caprin1/Ccnb2/Jmjd6/Mapre1/Birc5/Dbnl/Senp6/Eif6/Flna/Dock5/Ddb1/Rrp7a/Tns3/Smc3/Cdk5rap2/Nrap/Gtf2b/Msn/Brix1/Rps5/Dcaf13/Rplp0/Rab11a/Rbm14/Tpr/Npm1/Rps27l/Arpc2/Chmp6/Mrps7/Ccsap/Rps3/Rangrf/Kif3b/Tmod3/Rpl11
GO:0008593	regulation of Notch signaling pathway	70	-0.649339	-1.60221	0.00518724	0.00518724	0.0598162	636	tags=14%, list=4%, signal=14%	Enho/Stat3/Acvrl1/Bcl6/Il6st/Notch1/Lfng/Hes1/Egfl7/Dlk1
GO:0001885	endothelial cell development	64	-0.660468	-1.60168	0.00520993	0.00520993	0.0599426	630	tags=16%, list=4%, signal=15%	Myd88/Tnfrsf1a/F11r/Hpse/Vegfa/Col18a1/Pecam1/Cldn5/Sox18/Cdh5
GO:0006525	arginine metabolic process	14	0.790907	1.66904	0.0052401	0.0052401	0.0600282	1609	tags=36%, list=11%, signal=32%	Ass1/Atp2b4/Oat/Fh1/Asl
GO:0042273	ribosomal large subunit biogenesis	69	0.561892	1.58329	0.00524087	0.00524087	0.0600282	2889	tags=49%, list=20%, signal=40%	Rrs1/Nhp2/Ebna1bp2/Mrpl20/Nop16/Bop1/Tma16/Mrto4/Wdr12/Eif6/Ftsj3/Brix1/Rplp0/Pak1ip1/Npm1/Mak16/Gtpbp4/Rpl14/Rpl11/Rpl10a/Znhit6/Zfp622/Rpf2/Rsl1d1/Sdad1/Mdn1/Rrp15/Nifk/Wdr74/Ppan/Heatr3/Nop2/Las1l/Rpl7
GO:0046634	regulation of alpha-beta T cell activation	114	-0.580807	-1.53096	0.00527876	0.00527876	0.0603269	637	tags=23%, list=4%, signal=22%	Cd274/Syk/Sash3/Lgals9/Tgfbr2/Zbtb7b/Nfkbid/Il4ra/Bcl6/Hlx/Rara/H2-K1/H2-D1/Cd83/H2-T22/Irf1/Cd300a/Card11/H2-Q4/H2-Q6/Cd28/Ccr2/H2-Q7/Irgm1/H2-T23/H2-Ab1
GO:0035306	positive regulation of dephosphorylation	50	-0.687553	-1.62891	0.00532114	0.00532114	0.0606755	802	tags=26%, list=5%, signal=25%	Cnep1r1/Pink1/Gna12/Vrk3/Mef2c/Chp2/Igbp1/Ankle2/Itga1/Cd300a/Pdgfrb/Agtr2/Cdh5
GO:0045823	positive regulation of heart contraction	25	0.7251	1.68983	0.00540631	0.00540631	0.0615093	1283	tags=24%, list=9%, signal=22%	Edn1/Sirt1/Adrb2/Atp1a1/Gch1/Pde4d
GO:0046633	alpha-beta T cell proliferation	58	-0.672852	-1.62177	0.0054377	0.0054377	0.061728	1404	tags=36%, list=10%, signal=33%	H2-Q10/Itch/Cd274/Syk/Il15/Lgals9/Tgfbr2/Elf4/Zbtb7b/H2-K1/H2-D1/H2-T22/Irf1/Card11/H2-Q4/H2-Q6/Cd28/Ccr2/H2-Q7/Irgm1/H2-T23
GO:0051168	nuclear export	152	0.461611	1.4628	0.00544969	0.00544969	0.061728	2216	tags=31%, list=15%, signal=27%	Nup107/Mdm2/Chchd4/Txn1/Ran/Bag3/Hspa9/Park7/Ncbp2/Calr/Nup62/Srsf3/Abce1/Ifi27/Hnrnpa2b1/Camk1/Ywhae/Anp32b/Thoc6/Smurf1/Nsun2/Eny2/Eif6/Egr2/Dhx9/Malt1/Dusp16/Pabpn1/Rangap1/Sfn/Gsk3b/Xpot/Tpr/Npm1/Ptpn11/Rbm10/Ranbp2/Eif4e/Iws1/Pcid2/Xpo1/Ncbp1/Lsg1/Nup93/Nemf/Sdad1/Supt6
GO:0044282	small molecule catabolic process	251	0.401641	1.34429	0.00552005	0.00552005	0.0623866	1604	tags=16%, list=11%, signal=15%	Slc16a3/Pgk1/Pkm/Aldoa/Tpi1/Pfkl/Atp2b4/Ldha/Eno1/Bdh2/Gapdh/Dbi/Esd/Pfkp/Pgd/Park7/Adh5/Dera/Abcd4/Gcsh/Bcat2/Gpi1/Oaz1/Galk1/Mtln/Hsd17b4/Got2/Etfb/Nudt3/Glud1/Acot7/Scly/Acadm/Qdpr/Xdh/Oat/Lpin2/Trp53/Nudt5/Hk1/Glo1
GO:0002824	positive regulation of adaptive immune response based on somatic recombination of immune receptors built from immunoglobulin superfamily domains	111	-0.591216	-1.55075	0.00553302	0.00553302	0.0623952	1448	tags=25%, list=10%, signal=23%	P2rx7/H2-Q10/Slc11a1/Cd40/Zbtb1/Cd274/Sash3/H2-T24/Kmt5c/Tap2/Nfkbid/B2m/Fcgr3/Dennd1b/H2-K1/H2-D1/H2-M3/H2-T22/Arid5a/Fcgr1/H2-Q4/H2-Q6/Cd28/Ccr2/H2-Q7/H2-T23/H2-DMa/H2-Ab1
GO:0006520	amino acid metabolic process	196	0.439033	1.42126	0.00555558	0.00555558	0.0625116	1685	tags=18%, list=11%, signal=16%	Ass1/Atp2b4/Txnrd1/P4ha1/Egln1/Odc1/Slc38a1/Gclm/Park7/Gcsh/Bcat2/Atf4/Oaz1/Mthfd2l/Icmt/Atp7a/Gclc/Prdx4/Got2/Aarsd1/Pcmt1/Shmt2/Azin1/Slc7a11/Glud1/Mthfd1/Nit2/Scly/Spr/Qdpr/Gpt2/Oat/P4hb/Fh1/Asl/Dhfr
GO:0046640	regulation of alpha-beta T cell proliferation	53	-0.70795	-1.68741	0.00558513	0.00558513	0.062706	1404	tags=36%, list=10%, signal=33%	H2-Q10/Itch/Cd274/Syk/Lgals9/Tgfbr2/Zbtb7b/H2-K1/H2-D1/H2-T22/Irf1/Card11/H2-Q4/H2-Q6/Cd28/Ccr2/H2-Q7/Irgm1/H2-T23
GO:0061572	actin filament bundle organization	154	0.464019	1.46807	0.00560677	0.00560677	0.0628108	1309	tags=19%, list=9%, signal=18%	S100a10/Baiap2/Abl2/Diaph3/Wnt4/Spire1/Rgcc/Hsp90b1/Stmn1/Sdc4/Pik3r1/Lcp1/Eln/Myh9/Pfn1/Rhoc/Ppfia1/Ezr/Shtn1/Actg1/Actn1/Mtss1/Eps8/Dnm2/Fhod1/Flna/Cfl1/Lima1/Pdlim4/Swap70
GO:0002468	dendritic cell antigen processing and presentation	12	-0.870647	-1.67277	0.00567362	0.00567362	0.0634207	297	tags=42%, list=2%, signal=41%	Slc11a1/Fgl2/Thbs1/Fcgr4/Cd74
GO:2001234	negative regulation of apoptotic signaling pathway	217	0.422915	1.38147	0.00568949	0.00568949	0.0634592	1280	tags=19%, list=9%, signal=18%	Tnf/Mif/Ddias/Eno1/Hells/Serpine1/Hyou1/Cflar/Wnt4/Hmox1/Higd1a/Sirt1/Gclm/Lmna/Mdm2/Prelid1/Lgals3/Park7/Itgav/Pea15a/Sod2/Itga6/Atf4/Ppia/Hif1a/Bcl2l1/Gnai3/Prdx2/Il10/Bax/Cd44/Gclc/Bak1/Fxn/Selenos/Pam16/Slc25a4/Ybx3/Map2k5/Dab2/Psmd10/Hmgb2
GO:0039531	regulation of cytoplasmic pattern recognition receptor signaling pathway	108	-0.594005	-1.55506	0.00572164	0.00572164	0.0636787	1399	tags=26%, list=9%, signal=24%	Tlr4/Nop53/Gramd4/Itch/Ifi214/Sec14l1/Pum2/Mefv/Trim11/Pcbp2/Eif2ak2/Cgas/Myd88/Dhx58/Igtp/Irgm2/Ifi204/Trim30a/Gbp2/Ifi203/Ddx60/Mndal/Irgm1/Ifi211/Ifi209/Cav1/Ifi206/Ifi213
GO:0003158	endothelium development	124	-0.576421	-1.54491	0.00578096	0.00578096	0.0641991	633	tags=16%, list=4%, signal=16%	Rhob/Myd88/Acvrl1/Tnfrsf1a/F11r/Btg1/Foxj2/Hpse/Vegfa/Notch1/Kdr/Col18a1/Zeb1/Cxcr4/Slc40a1/Adamts12/Pecam1/Cldn5/Sox18/Cdh5
GO:0010951	negative regulation of endopeptidase activity	100	-0.599401	-1.543	0.00582598	0.00582598	0.0644028	567	tags=15%, list=4%, signal=15%	Cst3/Naip5/Cdkn2d/Nr4a1/Vegfa/Serping1/Ifi204/Thbs1/Ifi203/Mndal/Ifi211/Ifi209/Ifi206/Ifi213/Aqp1
GO:0006974	DNA damage response	794	0.324547	1.21212	0.0058297	0.0058297	0.0644028	1870	tags=18%, list=13%, signal=16%	Dyrk3/Zranb3/Bbc3/Tnf/Mif/Ddias/Nupr1/Gadd45a/Mcm5/Spire1/Mcm2/Ercc6/Hmox1/Chchd6/Sirt1/Uhrf1/Mdm2/Myc/Fnip2/Mcm3/Vcp/Chchd4/Spred2/Nfat5/Nbn/Mcm7/Pcna/Ube2a/Rfc4/Pik3r1/Tank/Mcm4/Park7/Nsd2/Sfr1/Ppp4r2/Sod2/Cib1/Gtf2h1/Ddx1/Lig1/Cdk6/Rad23b/Ccnd1/Sfpq/Usp16/Spred1/Bcl2l1/Mcm6/Nucks1/Kmt5a/Rrm1/Cyren/Smarca4/Gtf2h5/Swi5/Rnaseh2c/Actl6a/Usp10/Cenpx/Cenps/Bax/E2f1/Crip1/Cd44/Pole3/Ube2n/Bak1/Ash2l/…
GO:0060759	regulation of response to cytokine stimulus	139	-0.571455	-1.55466	0.00583712	0.00583712	0.0644028	595	tags=17%, list=4%, signal=16%	Adar/Tnfrsf1a/Naip5/Irak2/Il6st/Crebrf/Parp14/Igtp/Irgm2/Samhd1/Parp9/Cxcr4/Nlrc5/Stat2/Irgm1/Axl/Cd74/Zbp1/Oas1g/Tslp/Cav1/Irf7/Oas3
GO:0006271	DNA strand elongation involved in DNA replication	13	0.797155	1.6661	0.00586197	0.00586197	0.0645375	1278	tags=62%, list=9%, signal=56%	Mcm3/Mcm7/Pcna/Mcm4/Lig1/Pole3/Pola1/Pold3
GO:0010460	positive regulation of heart rate	18	0.757006	1.64744	0.0059981	0.0059981	0.0658942	1283	tags=22%, list=9%, signal=20%	Edn1/Sirt1/Gch1/Pde4d
GO:0051131	chaperone-mediated protein complex assembly	17	0.77531	1.67335	0.00601324	0.00601324	0.0659036	1349	tags=53%, list=9%, signal=48%	Ptges3l/Hsp90aa1/Hspa4/Cct2/Lonp1/Pfdn6/Psmg1/Ptges3/Stub1
GO:0042102	positive regulation of T cell proliferation	98	-0.592089	-1.5272	0.00602476	0.00602476	0.0659036	559	tags=22%, list=4%, signal=22%	Cd274/Syk/Il15/Sash3/Tgfbr2/Stat5b/Il6st/H2-K1/H2-D1/Icosl/H2-T22/Hes1/Card11/H2-Q4/H2-Q6/Cd28/Ccr2/H2-Q7/Irgm1/H2-T23/H2-DMb1/Igf2
GO:0120193	tight junction organization	60	-0.669048	-1.6188	0.00609459	0.00609459	0.0665251	592	tags=12%, list=4%, signal=11%	Acvrl1/F11r/Pecam1/Ramp2/Esam/Cldn5/Cdh5
GO:0042832	defense response to protozoan	37	-0.732828	-1.6609	0.00613143	0.00613143	0.0667278	1402	tags=49%, list=10%, signal=44%	Cd37/Slc11a1/Tgtp2/Cd40/Gbp7/Myd88/Il4ra/Gbp3/Igtp/Irgm2/Gbp2/Irf8/Bcl3/Gbp9/Batf/Tlr12/Gbp8/Iigp1
GO:0051298	centrosome duplication	69	0.556076	1.5669	0.00613928	0.00613928	0.0667278	2579	tags=26%, list=17%, signal=22%	Ccnf/Plk2/Sirt1/Nat10/Nup62/Chmp2b/Azin1/Pdcd6ip/Cdk5rap2/Npm1/Rock2/Xpo1/Chmp2a/Sac3d1/Nubp1/Ppp1r35/Stil/Cetn2
GO:0048243	norepinephrine secretion	13	-0.8518	-1.64826	0.00624307	0.00624307	0.0677117	1108	tags=23%, list=8%, signal=21%	P2ry12/Ptgs1/Agtr2
GO:0032732	positive regulation of interleukin-1 production	71	-0.646465	-1.60375	0.00627988	0.00627988	0.067914	1086	tags=23%, list=7%, signal=21%	Mefv/Lgals9/Casp8/Gsdmd/Stat3/Myd88/Naip5/Ifi204/Ccr5/Ifi203/Mndal/Ifi211/Ifi209/Il16/Ifi206/Ifi213
GO:0019731	antibacterial humoral response	33	-0.737964	-1.64188	0.00629913	0.00629913	0.067914	1404	tags=52%, list=10%, signal=47%	H2-Q10/Wfdc18/Spon2/Wfdc17/Ang/Rpl39/B2m/H2-K1/H2-D1/H2-T22/Trf/H2-Q4/H2-Q6/H2-Q7/H2-T23/Ighm/Rnase6
GO:0060841	venous blood vessel development	16	-0.835354	-1.65237	0.00630161	0.00630161	0.067914	1115	tags=38%, list=8%, signal=35%	Ccm2/Eng/Acvrl1/Vegfa/Notch1/Aplnr
GO:0007507	heart development	537	-0.4406	-1.35098	0.00636682	0.00636682	0.068467	1438	tags=15%, list=10%, signal=14%	Tnfrsf1b/Ece1/Zfp36l1/Sgcb/Pde2a/Pi16/Tie1/Wdr11/Nox4/Nfatc1/Epha3/Uty/Ncoa6/Matr3/Nrp1/Ednra/Fzd7/Calcrl/Sorbs2/Ccm2/Atf7/Itga4/Adap2/Casp3/Hopx/Casp8/Grk2/Tgfbr2/Abcc9/Arid1a/Stk4/Mdm4/Col14a1/Egfr/Kat6a/Pim1/Ccnd2/Hhex/Pdcd4/Eng/Ep300/Mef2c/Insr/Parp2/Acvrl1/Tnfrsf1a/Ndst1/Dhrs3/Sox4/Adamts1/Cdkn1a/Cdkn1b/Hspg2/Sik1/Rara/Bicc1/Notch2/Vegfa/Notch1/Adam19/Tmem94/Kdr/Mmp2/Hes1/Id3/Thbs1/Cxcr4/Dus…
GO:2001185	regulation of CD8-positive, alpha-beta T cell activation	26	-0.772192	-1.66261	0.00637972	0.00637972	0.068467	637	tags=46%, list=4%, signal=44%	Runx3/H2-Q10/Cd274/Zbtb7b/H2-K1/H2-D1/H2-T22/Irf1/H2-Q4/H2-Q6/H2-Q7/H2-T23
GO:0002768	immune response-regulating cell surface receptor signaling pathway	238	-0.506109	-1.45089	0.00653037	0.00653037	0.0699368	1301	tags=21%, list=9%, signal=20%	Lbp/H2-Q10/Laptm5/Oas1a/Rab11fip2/Lcp2/Cd40/Syk/Ticam2/C3ar1/Nr1d1/Nmi/Dab2ip/Lpxn/Cd47/Klhl6/Ifi35/Tnfrsf21/C5ar2/Mef2c/Nfam1/Cd14/Myd88/Pde4b/Nfkbid/Cd79b/Dusp22/Irak2/Dennd1b/Csk/Cmklr1/Usp12/H2-K1/Tlr1/H2-D1/Ly96/Fosl2/Icosl/Cd22/Cd300a/Card11/H2-Q4/H2-Q6/Cd28/H2-Q7/Scimp/Themis2/Oas1g/Ighm/Cd38/Clec2i
GO:0098813	nuclear chromosome segregation	266	0.394644	1.33996	0.00659263	0.00659263	0.0704559	3801	tags=39%, list=26%, signal=29%	Rrs1/Sirt1/Uhrf1/Gem/Ran/Kif2a/Spdl1/Nup62/Spc24/Ttl/Chmp2b/Pinx1/Ncapg2/Smarca4/Cdt1/Actl6a/Ccnb2/Mapre1/Birc5/Nek6/Flna/Ddb1/Smc3/Cdk5rap2/Syce2/Anapc15/Dcaf13/Zwint/Rab11a/Tpr/Mad2l1/Dync1li1/Espl1/Chmp6/Ncaph2/Ccsap/Nsmce2/Kat5/Rangrf/Kif3b/Wapl/Pcid2/Ppp2r1a/Cdc42/Tubg1/Tacc3/Cul3/Smc2/Cdca8/Bag6/Smarca5/Spc25/Anapc7/Chmp2a/Psmc3ip/BC005624/Smarcb1/Lcmt1/Ndc1/Nudc/Zw10/Zfp207/Chfr/Wrap73/Lat…
GO:0051017	actin filament bundle assembly	150	0.4593	1.44763	0.00666149	0.00666149	0.0709873	1309	tags=19%, list=9%, signal=17%	S100a10/Baiap2/Abl2/Diaph3/Wnt4/Spire1/Rgcc/Hsp90b1/Stmn1/Sdc4/Pik3r1/Lcp1/Eln/Myh9/Pfn1/Rhoc/Ppfia1/Ezr/Actg1/Actn1/Mtss1/Eps8/Fhod1/Flna/Cfl1/Lima1/Pdlim4/Swap70
GO:0048706	embryonic skeletal system development	103	-0.597396	-1.55196	0.00667014	0.00667014	0.0709873	1392	tags=28%, list=9%, signal=26%	Deaf1/Mbtd1/Pcgf2/Wnt5a/Hoxc6/Sp1/Gli3/Nipbl/Rdh10/Osr2/Slc39a3/Etl4/Six1/Tgfb3/Sulf1/Sp3/Bmi1/Ednra/Tgfbr2/Prrx1/Slc39a1/Mef2c/Ndst1/Hspg2/Pbx1/Zeb1/Pdgfra/Gas1/Dlk1
GO:0098761	cellular response to interleukin-7	16	0.776315	1.68739	0.00680793	0.00680793	0.0723031	1457	tags=50%, list=10%, signal=45%	Eno1/Hspd1/Gipc1/Rad23b/Pdia3/Ybx1/Stip1/P4hb
GO:0008053	mitochondrial fusion	34	0.669931	1.64702	0.00684346	0.00684346	0.0725296	1971	tags=38%, list=13%, signal=33%	Bnip3/Vat1/Dnm1l/Bax/Stoml2/Bak1/Afg3l1/Tfrc/Rcc1l/Afg3l2/Mff/Mul1/Chchd3
GO:1903533	regulation of protein targeting	49	0.59833	1.59375	0.00694993	0.00694993	0.0730859	507	tags=14%, list=3%, signal=14%	Cdk5r1/Ccl2/Itgam/Bag3/Hras/Pdcd5/Cib1
GO:0051937	catecholamine transport	48	-0.679943	-1.5959	0.00695152	0.00695152	0.0730859	1713	tags=23%, list=12%, signal=20%	Rab3a/Gabbr1/Sncg/Pink1/Smpd3/P2ry12/Slc29a3/Grk2/Ptgs1/Cxcl12/Agtr2
GO:0061028	establishment of endothelial barrier	48	-0.679916	-1.59584	0.00695152	0.00695152	0.0730859	630	tags=19%, list=4%, signal=18%	Myd88/Tnfrsf1a/F11r/Hpse/Vegfa/Pecam1/Cldn5/Sox18/Cdh5
GO:0007423	sensory organ development	436	-0.453559	-1.37224	0.00695624	0.00695624	0.0730859	1184	tags=12%, list=8%, signal=12%	Nrp1/Rarg/Ednra/Sod1/Ccm2/Gdf3/Tfap4/Pbx2/Rhoj/Rpl38/Cebpa/Tgfbr2/Tgif1/Arid1a/Prrx1/Egfr/Casp6/Ikzf1/Maf/Stat3/Acvrl1/Mfap2/Sox4/Ctns/Cdkn1b/Map3k1/Pbx1/Rara/H2-K1/Notch2/Lrp5/Vegfa/Cebpd/Notch1/Mertk/Ifi204/Cdkn1c/Kdr/Zeb1/Hes1/Rpgrip1/Nfia/Tifab/Pdgfrb/Igfbp7/Pdgfra/H2-T23/H2-DMa/Nfib/Gas1/Col4a1/Flt1/Aqp1
GO:0090199	regulation of release of cytochrome c from mitochondria	47	0.608608	1.60399	0.00696748	0.00696748	0.0730859	1268	tags=28%, list=9%, signal=25%	Bnip3/Bbc3/Fam162a/Higd1a/Lmna/Prelid1/Pdcd5/Dnm1l/Bcl2l1/Bax/Bak1/Fxn/Psmd10
GO:0051924	regulation of calcium ion transport	210	-0.51258	-1.45233	0.00698769	0.00698769	0.0731477	983	tags=11%, list=7%, signal=11%	Asph/Vmp1/Rrad/Slc30a1/P2rx4/Slc8b1/Pde4b/Orai1/Zfas1/Pml/Hes1/Cxcr4/Gpr35/Pdgfrb/Tspan13/Mylk/Clec4b1/Cxcl12/Ace/Il16/Cxcl9/Cav1/Atp1a2/Aplnr
GO:0071827	plasma lipoprotein particle organization	27	-0.767576	-1.66193	0.00710473	0.00710473	0.0742207	1334	tags=30%, list=9%, signal=27%	Dgat1/Nr1h2/Abca1/Scarb1/Pltp/Abcg1/Apoe/Apoc1
GO:0006883	intracellular sodium ion homeostasis	17	-0.82732	-1.66662	0.00713873	0.00713873	0.0744237	329	tags=18%, list=2%, signal=17%	Atp1a3/Atp1a2/Agtr2
GO:1903236	regulation of leukocyte tethering or rolling	13	-0.847685	-1.64029	0.00716012	0.00716012	0.0744947	1323	tags=46%, list=9%, signal=42%	Gcnt1/Itga4/St3gal4/Ptafr/Ccr2/Cxcl12
GO:0090314	positive regulation of protein targeting to membrane	26	0.7067	1.65671	0.00717769	0.00717769	0.0745257	507	tags=19%, list=3%, signal=19%	Cdk5r1/Ccl2/Itgam/Hras/Cib1
GO:0045214	sarcomere organization	48	0.615951	1.629	0.00722979	0.00722979	0.0747595	871	tags=19%, list=6%, signal=18%	Edn1/Plec/Tnnt1/Actg1/Prkar1a/Itgb1/Wdr1/Tnnt2/Csrp1
GO:0009123	nucleoside monophosphate metabolic process	59	0.571423	1.55519	0.0072589	0.0072589	0.0747595	2040	tags=32%, list=14%, signal=28%	Ampd3/Tk1/Nme1/Aprt/Nme2/Dtymk/Dut/Impdh1/Gmpr/Dnph1/Nudt2/Uck2/Xdh/Tyms/Ak2/Umps/Upp2/Nt5c/Cmpk1
GO:0045666	positive regulation of neuron differentiation	67	-0.642393	-1.57687	0.00726918	0.00726918	0.0747595	995	tags=16%, list=7%, signal=15%	Tcf4/Tgif1/Mef2c/Bcl6/Rara/Impact/Zeb1/Ccr5/Nbl1/Cxcl12/Heyl
GO:0002438	acute inflammatory response to antigenic stimulus	29	-0.751248	-1.64169	0.00727624	0.00727624	0.0747595	543	tags=41%, list=4%, signal=40%	Fcgr3/H2-K1/H2-D1/Fcgr2b/Pla2g2d/H2-T22/Fcgr1/H2-Q4/H2-Q6/H2-Q7/Fcgr4/H2-T23
GO:0030509	BMP signaling pathway	108	-0.586632	-1.53575	0.00727699	0.00727699	0.0747595	740	tags=17%, list=5%, signal=16%	Pdcd4/Eng/Gpr155/Acvrl1/Numa1/Sorl1/Bambi/Notch2/Notch1/Tcf7l2/Kdr/Hes1/Nfia/Nbl1/Tgfbr3/Cav1/Rgma/Cdh5
GO:0055003	cardiac myofibril assembly	16	-0.829134	-1.64006	0.00728802	0.00728802	0.0747595	168	tags=31%, list=1%, signal=31%	Myh10/Prox1/Pdgfrb/Pdgfra/Actc1
GO:0071560	cellular response to transforming growth factor beta stimulus	211	-0.511547	-1.44912	0.00730449	0.00730449	0.0747784	1253	tags=18%, list=8%, signal=17%	Kmt2a/Htra3/Pparg/Tnrc6c/Flcn/Fut8/Fermt2/Pxn/Zyx/Apaf1/Lgals9/Lpxn/Tgfbr2/Zfp36l2/Gcnt2/Arid4a/Eng/Ep300/Mef2c/Stat3/Acvrl1/Dusp22/Map3k1/Bambi/Fos/Nrros/Cdkn1c/Pml/Zeb1/Thbs1/Tgfbr3/Peg10/Hpgd/Ltbp4/Col4a2/Cav1/Nrep/Cldn5/Cdh5
GO:0043436	oxoacid metabolic process	659	0.333497	1.21704	0.00737807	0.00737807	0.0753806	1714	tags=18%, list=12%, signal=17%	Slc16a3/Aldoc/Edn1/Pgk1/Dhrs9/Pkm/Aldoa/Tpi1/Pfkl/Pgam1/Ass1/Mif/Pdk1/Atp2b4/Ldha/Nupr1/Eno1/Bdh2/Gapdh/Mgst3/Txnrd1/P4ha1/Anxa1/Egln1/Dbi/Odc1/Slc38a1/Grhpr/Sirt1/Gclm/Myc/Pdpn/Pfkp/Ndufab1/Fads1/Slc27a1/Pgd/Park7/Hsd17b12/Alox5/Adh5/Fabp5/Acsl1/Stard4/Abcd4/Gcsh/Insig1/Prxl2b/Per2/C3/Bcat2/Atf4/Gpi1/Oaz1/Alox5ap/Hif1a/Ptgr1/Mthfd2l/Galk1/Por/Mpc1/Slc23a2/Mtln/Pdzd11/Nfe2l1/Icmt/Hsd17b4/Atp7a/Gc…
GO:0000070	mitotic sister chromatid segregation	170	0.442176	1.40977	0.00741999	0.00741999	0.0756575	2973	tags=34%, list=20%, signal=27%	Rrs1/Sirt1/Uhrf1/Ran/Kif2a/Spdl1/Nup62/Spc24/Chmp2b/Pinx1/Ncapg2/Cdt1/Mapre1/Birc5/Flna/Smc3/Cdk5rap2/Anapc15/Zwint/Rab11a/Tpr/Mad2l1/Dync1li1/Espl1/Chmp6/Ncaph2/Ccsap/Nsmce2/Kat5/Rangrf/Kif3b/Wapl/Pcid2/Ppp2r1a/Tubg1/Cul3/Smc2/Cdca8/Smarca5/Spc25/Anapc7/Chmp2a/Lcmt1/Nudc/Zw10/Zfp207/Wrap73/Vps4a/Smc4/Kpnb1/Mad2l1bp/Rhoa/Ccnb1/Cdk1/Poldip2/Bub1/Cenpe
GO:0070509	calcium ion import	54	-0.668678	-1.59291	0.00750367	0.00750367	0.0763584	755	tags=17%, list=5%, signal=16%	Slc30a1/Orai1/Hes1/Cxcr4/Pdgfrb/Cxcl12/Atp2a1/Ace/Cav1
GO:0008637	apoptotic mitochondrial changes	109	0.512109	1.54468	0.00761837	0.00761837	0.0770782	1949	tags=34%, list=13%, signal=30%	Bnip3/Bbc3/Fam162a/Higd1a/Gclm/Lmna/Cd24a/Prelid1/Hspd1/Pdcd5/Sod2/Dnm1l/Vps35/Bcl2l1/Dap3/Bax/Atp7a/Gclc/Bak1/Fxn/Slc25a4/Siva1/Psmd10/Chchd10/Sfn/Gsk3b/Trp53/Vdac2/Rnf7/Aifm2/Pycard/Bcl2/Ndufs1/Rhot1/Jtb/Mff/Mul1
GO:0043129	surfactant homeostasis	18	-0.812272	-1.65335	0.0076222	0.0076222	0.0770782	521	tags=33%, list=4%, signal=32%	Oas1a/Ctsh/Vegfa/Napsa/Kdr/Oas1g
GO:0071280	cellular response to copper ion	11	-0.862092	-1.64711	0.00765043	0.00765043	0.0770782	505	tags=36%, list=3%, signal=35%	Nfe2l2/Daxx/Mt1/Aqp1
GO:0000910	cytokinesis	148	0.448422	1.40878	0.0076604	0.0076604	0.0770782	2618	tags=35%, list=18%, signal=29%	Plec/Diaph3/Spire1/Exoc5/Stmn1/Ahctf1/Calm3/Myh9/Nup62/Gipc1/Rhoc/Chmp2b/Pkp4/Dctn3/Bcl2l1/Calm1/Birc5/Exoc6b/Cfl1/Prpf40a/Pdcd6ip/Plk3/Pstpip1/Rab11a/Spast/Arl3/Rock2/Chmp6/Unc119/Pin1/Dstn/Iqgap1/Kif3b/Jtb/Cdc42/Entr1/Sh3glb1/Cul3/Rock1/Cdca8/Cdc14a/Exoc3/Orc4/Chmp2a/Birc6/Alkbh4/Stx2/Wnk1/Igf1r/Cetn2/Vps4a/Anxa11
GO:0014044	Schwann cell development	42	0.620238	1.58181	0.00766083	0.00766083	0.0770782	453	tags=14%, list=3%, signal=14%	Plec/Ndrg1/Pou3f1/Hras/Adgrg6/Pmp22
GO:0022603	regulation of anatomical structure morphogenesis	751	-0.40904	-1.2758	0.00766494	0.00766494	0.0770782	1270	tags=14%, list=9%, signal=13%	Sema4d/Sema5a/Lpar1/Pink1/Pparg/Cd40/Flcn/Ago4/Nrp1/Ednra/Ccl11/Pum2/C3ar1/Ccm2/Cx3cr1/Rhog/Fermt2/Pxn/Dab2ip/Gna12/Clasp2/Sh3d19/Tcf4/Rhoj/Ulk1/Palm/Eef2k/Ifrd1/Tgfbr2/Amot/Sema6d/Tgif1/Arhgap18/Hck/Sh2b3/Taok2/Hhex/Sema6b/Csf1r/Eng/Cst3/Ep300/Dip2b/Fgd4/Mef2c/Stat3/Rhob/Acvrl1/Tnfrsf1a/Adamts1/F11r/Ccl24/Ctsh/Btg1/Dcn/Klf2/Nfe2l2/Sdc2/Marcks/Foxj2/Bambi/Igtp/Pik3cd/Irgm2/Sema4a/Vegfa/Notch1/Jup…
GO:0048754	branching morphogenesis of an epithelial tube	140	-0.551031	-1.50005	0.00788338	0.00788338	0.0791191	1271	tags=19%, list=9%, signal=18%	Nfatc1/Sema5a/Nrp1/Ednra/Ccl11/Kdm5b/Pxn/Ncoa3/Tgfbr2/Rasip1/Stk4/Hhex/Eng/Ctsh/Pbx1/Lrp5/Vegfa/Notch1/Pml/Kdr/Cxcr4/Pdgfra/Cxcl12/Col4a1/Flt1/Lama5/Agtr2
GO:0032825	positive regulation of natural killer cell differentiation	11	-0.86042	-1.64391	0.00792612	0.00792612	0.0793921	1206	tags=55%, list=8%, signal=50%	Zbtb1/Flt3l/Il15/Stat5b/Irf1/Axl
GO:0007052	mitotic spindle organization	117	0.47265	1.44353	0.00798267	0.00798267	0.079802	2973	tags=38%, list=20%, signal=30%	Plk2/Uhrf1/Vcp/Stmn1/Kif2a/Nup62/Chmp2b/Fam110a/Birc5/Flna/Plk3/Smc3/Rab11a/Spast/Tpr/Chmp6/Ccsap/Parp3/Rangrf/Kif3b/Tubg1/Tacc3/Ptpa/Cdca8/Spc25/Map4/Chmp2a/Bora/Nudc/Cenph/Tacc2/Stil/Zfp207/Ints13/Tacc1/Wrap73/Kpnb1/Rae1/Rhoa/Ccnb1/Dync1h1/Poldip2/Dctn1/Cenpe
GO:1901136	carbohydrate derivative catabolic process	208	0.426447	1.3908	0.00807373	0.00807373	0.0804176	2023	tags=24%, list=14%, signal=21%	Aldoc/Pgk1/Pkm/Aldoa/Tpi1/Ampd3/Pfkl/Pgam1/Nupr1/Eno1/Gapdh/Myc/Gusb/Pfkp/Dera/Man1a/Dut/Gpi1/Hif1a/Itpa/Galk1/Hgsnat/Cd44/Dnph1/Eif6/Nudt3/Acot7/Hdac4/Ctsl/Hk3/Htr2a/Xdh/Cela1/Stt3b/Naglu/Hint1/Edem3/Hk1/App/Hyal1/Galc/Manba/Man1a2/Gale/Nudt19/Hexa/Upp2/Gla/Nt5c
GO:0032465	regulation of cytokinesis	73	0.538202	1.52319	0.00807573	0.00807573	0.0804176	3484	tags=47%, list=24%, signal=36%	Ahctf1/Calm3/Nup62/Gipc1/Pkp4/Bcl2l1/Calm1/Birc5/Prpf40a/Plk3/Rab11a/Spast/Pin1/Kif3b/Cdc42/Entr1/Sh3glb1/Cul3/Cdca8/Cdc14a/Birc6/Wnk1/Igf1r/Cetn2/Vps4a/Rhoa/Uvrag/Poldip2/Cdc6/Zfyve19/Kif23/Git1/Pkn2/Kif20b
GO:0003170	heart valve development	58	-0.659017	-1.58842	0.00809347	0.00809347	0.0804226	1438	tags=24%, list=10%, signal=22%	Tnfrsf1b/Pde2a/Tie1/Nfatc1/Matr3/Tgfbr2/Mdm4/Mef2c/Tnfrsf1a/Sox4/Notch2/Notch1/Heyl/Aplnr
GO:0050830	defense response to Gram-positive bacterium	77	-0.630025	-1.57348	0.00812139	0.00812139	0.0804226	1037	tags=27%, list=7%, signal=25%	Gbp7/Gsdmd/Hck/Lyz2/Ang/Rpl39/Rarres2/Myd88/B2m/Gbp3/H2-K1/H2-D1/Gbp2/H2-T22/H2-Q4/Gbp9/H2-Q6/H2-Q7/H2-T23/Gbp8/Rnase6
GO:0120162	positive regulation of cold-induced thermogenesis	82	-0.614543	-1.54626	0.00812346	0.00812346	0.0804226	690	tags=20%, list=5%, signal=19%	Thra/Ucp2/Adipor1/Zbtb7b/Gatm/Mfap2/Il4ra/Cmklr1/Cebpb/Vegfa/Lpin1/Grb10/Cxcr4/Plac8/Ccr2/Cav1
GO:0031577	spindle checkpoint signaling	49	0.592231	1.5775	0.00816266	0.00816266	0.0805029	2973	tags=45%, list=20%, signal=36%	Diaph3/Spdl1/Spc24/Birc5/Cdk5rap2/Anapc15/Zwint/Tpr/Mad2l1/Dync1li1/Pcid2/Cdca8/Spc25/Lcmt1/Zw10/Stil/Zfp207/Chfr/Mad2l1bp/Ccnb1/Bub1/Cenpe
GO:0046165	alcohol biosynthetic process	103	0.507209	1.52005	0.00816309	0.00816309	0.0805029	616	tags=18%, list=4%, signal=18%	Dhcr24/Fdps/Idi1/Cyp51/Msmo1/Mvd/Wnt4/Srebf2/Hmgcs1/Park7/Pmvk/Pgp/Rest/Nus1/Myh9/Insig1/Nfkb1/Cyb5r3/Fdft1
GO:0035886	vascular associated smooth muscle cell differentiation	36	-0.70871	-1.60283	0.00819539	0.00819539	0.0805736	740	tags=31%, list=5%, signal=29%	Sgcb/Nfatc1/Ednra/Pdcd4/Eng/Vegfa/Notch1/Hes1/Pdgfrb/Ramp2/Aplnr
GO:0071472	cellular response to salt stress	11	-0.860296	-1.64367	0.0082018	0.0082018	0.0805736	665	tags=27%, list=5%, signal=26%	Zfp36l1/Slc12a6/Aqp1
GO:0045785	positive regulation of cell adhesion	432	-0.454465	-1.3733	0.00831513	0.00831513	0.0813301	1206	tags=17%, list=8%, signal=16%	Zbtb1/Flcn/Nrp1/Cd274/Syk/Lamc1/Il15/Sash3/Rin2/P2ry12/Itga4/Fermt2/Il6ra/Lgals9/Cd47/Tgfbr2/Arid1a/Stk4/Gcnt2/Sirpb1a/Lama2/Zbtb7b/Nfkbid/B2m/Nedd9/Lamb1/Stat5b/Sox4/Il4ra/Bcl6/F11r/Hlx/Il6st/St3gal4/Rara/H2-K1/H2-D1/Vegfa/Icosl/Jup/Adam19/Ptafr/Cd83/Kdr/H2-T22/Smoc2/Hes1/Rhoh/Thbs1/Irf1/Gm5150/Ccr5/Card11/Sirpb1c/H2-Q4/H2-Q6/Cd28/Ccr2/Nid1/H2-Q7/Irgm1/Sirpb1b/H2-T23/H2-DMa/Cd74/Cxcl12/H2-Eb1/H2…
GO:0002524	hypersensitivity	22	-0.797753	-1.6662	0.00832423	0.00832423	0.0813301	543	tags=50%, list=4%, signal=48%	Fcgr3/H2-K1/H2-D1/Fcgr2b/H2-T22/Fcgr1/H2-Q4/H2-Q6/H2-Q7/Fcgr4/H2-T23
GO:0032760	positive regulation of tumor necrosis factor production	113	-0.572329	-1.50791	0.00832657	0.00832657	0.0813301	735	tags=24%, list=5%, signal=23%	Csf1r/Stat3/Cd14/Myd88/Zbtb20/Tnfrsf1a/Fcgr3/Ifngr1/H2-K1/Tlr1/H2-D1/Fcgr2b/Ly96/Akap12/Ptafr/H2-T22/Arid5a/Oas2/Thbs1/Ccr5/H2-Q4/H2-Q6/Ccr2/H2-Q7/H2-T23/Oas1g/Oas3
GO:0019221	cytokine-mediated signaling pathway	361	-0.458109	-1.37096	0.00834504	0.00834504	0.081355	1214	tags=19%, list=8%, signal=17%	Pparg/Dok1/Syk/Plvap/Ticam2/Ccl11/Il15/Cx3cr1/Il6ra/Irf5/Cebpa/Il21r/Il10ra/Sh2b3/Ifnar2/Il10rb/Csf1r/Osm/Adipor1/Stat3/Myd88/Adar/Tnfrsf1a/Naip5/Stat5b/Il4ra/Irak2/Ccl24/Ifngr1/Il6st/Tut4/Nsmaf/Crebrf/Parp14/Igtp/Irgm2/Csf3r/Ebi3/Csf2rb/Notch1/Ccl6/Samhd1/Oas2/Parp9/Cxcr4/Irf1/Stat1/Nlrc5/Gpr35/Oasl2/Ghr/Stat2/Ccr2/Irgm1/Ifitm3/Axl/Cd74/Cxcl12/Zbp1/Il16/Iigp1/Oas1g/Tslp/Cxcl9/Cav1/Irf7/Oas3
GO:0015850	organic hydroxy compound transport	190	-0.509578	-1.43454	0.00847942	0.00847942	0.0825075	1242	tags=17%, list=8%, signal=16%	Pink1/Nr1h2/Pparg/Smpd3/Syk/Kdm5b/P2ry12/Abcc3/Stard3/Slc29a3/Grk2/Pip4k2a/Abca1/Gpm6b/Stard5/Ptgs1/Relch/C1qtnf1/Scarb1/Fcgr3/Apoc2/Gramd1b/Pltp/Cd300a/Abcg1/Slco2b1/Apoe/Cxcl12/Cav1/Apoc1/Abca8a/Aqp1/Agtr2
GO:0015980	energy derivation by oxidation of organic compounds	269	0.37753	1.28396	0.00855305	0.00855305	0.0830657	2798	tags=38%, list=19%, signal=32%	Bnip3/Tnf/Plec/Ldha/Nupr1/Myc/Pgm1/Vcp/Chchd4/Prelid1/Ndufab1/Ugp2/Park7/Gys1/Sod2/Cox5a/Ndufb8/Coq7/Pygm/Per2/Ndufb9/Hif1a/Gadd45gip1/Ndufb10/Ndufb6/Stk40/Ndufs5/Uqcc2/Ndufc1/Mtln/Gbe1/Bax/Atp7a/Ndufa8/Stoml2/Fxn/Shmt2/Ndufs8/Etfb/Cox4i1/Uqcrq/Chchd2/Ptges3/Pik3ca/Ndufs7/Ndufb7/Acadm/Chchd10/Uqcr11/Ndufv2/Mdh2/Mybbp1a/Pgf/Gsk3b/Cox7b/Epm2aip1/Cisd1/Trp53/Cs/Ndufs6/Slc25a13/Ndufb2/Fh1/Ndufb5/Idh2…
GO:0048566	embryonic digestive tract development	21	-0.791008	-1.65165	0.00865698	0.00865698	0.0839156	718	tags=24%, list=5%, signal=23%	Rarres2/Hlx/Tcf7l2/Pkdcc/Pdgfra
GO:0089718	amino acid import across plasma membrane	37	0.641013	1.59958	0.00872773	0.00872773	0.0842232	1153	tags=24%, list=8%, signal=22%	Slc22a4/Tnf/Slc38a1/Per2/Slc7a1/Slc7a8/Itgb1/Slc7a5/Slc7a11
GO:0007051	spindle organization	177	0.436845	1.39826	0.0087335	0.0087335	0.0842232	2843	tags=33%, list=19%, signal=27%	Plk2/Uhrf1/Vcp/Stmn1/Ranbp1/Kif2a/Myh9/Nup62/Ezr/Chmp2b/Fam110a/Ccnb2/Mapre1/Birc5/Senp6/Flna/Ddb1/Plk3/Smc3/Gtf2b/Dcaf13/Rab11a/Spast/Tpr/Espl1/Chmp6/Ccsap/Rps3/Parp3/Rangrf/Kif3b/Ppp2r1a/Tubg1/Tacc3/Ptpa/Cdca8/Spc25/Map4/Pde4dip/Chmp2a/Sac3d1/Bora/Nudc/Cenph/Tacc2/Stil/Zfp207/Ints13/Tacc1/Wrap73/Haus1/Kpnb1/Rae1/Rhoa/Ccnb1/Dync1h1/Uvrag/Poldip2
GO:0031664	regulation of lipopolysaccharide-mediated signaling pathway	28	-0.733191	-1.60247	0.00873818	0.00873818	0.0842232	635	tags=36%, list=4%, signal=34%	Cd14/Trib1/Trim12a/Tut4/Trim12c/Ly96/Trim30a/Ly86/Trim30d/Scimp
GO:0022904	respiratory electron transport chain	83	0.516559	1.49763	0.00882035	0.00882035	0.0846761	3501	tags=52%, list=24%, signal=40%	Plec/Park7/Sod2/Cox5a/Ndufb8/Coq7/Ndufb9/Ndufb6/Ndufa8/Ndufs8/Etfb/Cox4i1/Uqcrq/Chchd2/Ndufs7/Uqcr11/Ndufv2/Mybbp1a/Cox7b/Ndufs6/Slc25a13/Ndufs1/Ndufs4/Iscu/Sco2/Ndufc2/Afg1l/Sdhc/Dld/Cox6a1/Ndufv3/Cox7a2/Ccnb1/Cdk1/Cycs/Ndufa10/Ndufa12/Cox5b/Ndufv1/Slc1a3/Dnajc15/Cyc1/Mtch2
GO:0010257	NADH dehydrogenase complex assembly	53	0.598484	1.60285	0.00887098	0.00887098	0.0846761	3142	tags=55%, list=21%, signal=43%	Ndufab1/Ndufb8/Ndufb9/Ndufb10/Ndufb6/Ndufs5/Tmem126a/Ndufc1/Ndufa8/Ndufs8/Ndufs7/Ndufb7/Ndufs6/Ndufb2/Ndufb5/Ndufaf2/Ndufs1/Ndufb11/Ndufaf4/Ndufs4/Lyrm2/Ndufaf7/Ndufc2/Ndufa11/Ndufa9/Ndufa10/Ndufb3/Ndufa12/Ndufa1
GO:0032981	mitochondrial respiratory chain complex I assembly	53	0.598484	1.60285	0.00887098	0.00887098	0.0846761	3142	tags=55%, list=21%, signal=43%	Ndufab1/Ndufb8/Ndufb9/Ndufb10/Ndufb6/Ndufs5/Tmem126a/Ndufc1/Ndufa8/Ndufs8/Ndufs7/Ndufb7/Ndufs6/Ndufb2/Ndufb5/Ndufaf2/Ndufs1/Ndufb11/Ndufaf4/Ndufs4/Lyrm2/Ndufaf7/Ndufc2/Ndufa11/Ndufa9/Ndufa10/Ndufb3/Ndufa12/Ndufa1
GO:0043254	regulation of protein-containing complex assembly	385	-0.447304	-1.34081	0.00889799	0.00889799	0.0846761	1242	tags=14%, list=8%, signal=13%	Pink1/Nr1h2/Syk/Ccl11/Atf7ip/P2ry12/Mefv/Trim11/Fermt2/Dab2ip/Clasp2/Ulk1/Plekhg2/Abca1/Sptbn1/Rasip1/Arhgap18/Hck/Ikzf1/Eif2ak2/Ep300/Thra/Slf2/Myd88/Numa1/Ccl24/Cdkn1b/Ssh2/Sorl1/Map3k1/Evl/Igtp/Irgm2/Vegfa/Ifi204/Svil/Trim30a/Gbp2/Hes1/Bmf/Ifi203/Mndal/Irgm1/Ifi211/Apoe/Ifi209/Xaf1/Pecam1/Cav1/Clec2i/Ifi206/Ifi213/Esam/Cdh5
GO:0033344	cholesterol efflux	43	-0.700288	-1.61371	0.00892005	0.00892005	0.0846761	549	tags=26%, list=4%, signal=25%	Nr1h2/Pparg/Abca1/Scarb1/Apoc2/Pltp/Abcg1/Apoe/Cav1/Apoc1/Abca8a
GO:0050680	negative regulation of epithelial cell proliferation	131	-0.563495	-1.51761	0.00892139	0.00892139	0.0846761	743	tags=15%, list=5%, signal=15%	Stk4/Klf9/Eng/Mef2c/B2m/Acvrl1/Cdkn1b/Zfas1/Notch1/Cdkn1c/Zeb1/Thbs1/Stat1/Tgfbr3/Apoe/Nfib/Gas1/Flt1/Cav1/Dlk1
GO:0010970	transport along microtubule	153	0.452185	1.43099	0.00892488	0.00892488	0.0846761	3249	tags=33%, list=22%, signal=26%	Tuba1a/Ift20/Dst/Dynll1/Arl8b/Kif5b/Arhgap21/Bicd2/Sfpq/Fbxw11/Hif1a/Hsbp1/Ssx2ip/Rab21/Spg7/Pafah1b1/Vamp7/Spast/Arl3/Borcs8/App/Borcs7/Ssna1/Kif3b/Rhot1/Stau2/Cdc42/Kif3a/Ift46/Ift27/Arl8a/Ap3m1/Actr10/Rab1a/Ift43/Dync1i2/Ift52/Trak2/Bloc1s2/Cluap1/Dync1h1/Cep131/Kif1b/Flot2/Dtnbp1/Mgarp/Kif1c/Ift122/Hnrnpu/Kif1a
GO:0042509	regulation of tyrosine phosphorylation of STAT protein	55	-0.663272	-1.58441	0.00892995	0.00892995	0.0846761	1210	tags=25%, list=8%, signal=23%	Cd40/Il15/Il6ra/Csf1r/Osm/Tnfrsf1a/Il6st/Parp14/Hes1/Parp9/Irf1/Pecam1/Tslp/Cav1
GO:1904377	positive regulation of protein localization to cell periphery	62	0.550539	1.51829	0.00893435	0.00893435	0.0846761	1900	tags=29%, list=13%, signal=25%	Tnf/Atp2b4/Stx3/Lgals3/Cib1/Ezr/Kif5b/Vps35/Stx4a/Eif4g1/Itgb1/Stac2/Zdhhc5/Epb41l2/Rab11a/Rangrf/Commd1/Cnst
GO:0032984	protein-containing complex disassembly	225	0.409374	1.33648	0.00895277	0.00895277	0.0846936	1955	tags=24%, list=13%, signal=21%	Dyrk3/Bnip3/Tnf/Diaph3/Myc/Gspt1/Vcp/Stmn1/Capg/Adrb2/Smcr8/Gsn/Irak3/Cib1/Per2/Chmp2b/Epg5/Abce1/Kif5b/Sptan1/Eif5a/Wdr1/Smarca4/Eps8/Calm1/Atp2a2/Ubqln1/Tom1/Cfl1/Nes/Atg5/Lima1/Oga/Mical1/Pik3ca/Swap70/Grwd1/Etf1/Gsk3b/Mical2/Scaf4/Sgk1/Smn1/Map1lc3b/Arpc2/Chmp6/Ccsap/Nckap5l/Dstn/Snx14/Tmod3/Hspa8/Tpm1/Twf1
GO:0001501	skeletal system development	429	-0.450308	-1.35893	0.00898057	0.00898057	0.0847995	2748	tags=28%, list=19%, signal=23%	Asxl2/Acp5/Foxp1/Mef2d/Sbds/Plekha1/Mcph1/Deaf1/Mbtd1/Bbx/Pcgf2/Rai1/Zbtb7a/Dchs1/Bmp5/Schip1/Ctc1/Thbs3/Wnt5a/Acvr2b/Foxc1/Hoxc6/Jag2/Sp1/Fat4/Ift80/Tgfb1/Mgp/Sfrp4/Atf2/Gli3/Nipbl/Rdh10/Col6a1/Mustn1/Timp3/Smad1/Osr2/Actn3/Tbx3/Fgr/Nfix/Hoxc10/Errfi1/Slc39a3/Inppl1/Msx1/Lipa/Ski/Etl4/Mdk/Myoc/Six1/Fbxw4/Efemp1/Mapk14/Tgfb3/Lrp6/Snai2/Insig2/Pkd1/Enpp1/Runx3/Prpsap2/Zfp219/P2rx7/Sulf1/Sp3/Ltbp3/…
GO:0140888	interferon-mediated signaling pathway	69	-0.631765	-1.55119	0.00902435	0.00902435	0.0850557	630	tags=29%, list=4%, signal=28%	Ifnar2/Myd88/Adar/Ifngr1/Parp14/Igtp/Irgm2/Samhd1/Oas2/Parp9/Irf1/Stat1/Nlrc5/Stat2/Irgm1/Ifitm3/Zbp1/Oas1g/Irf7/Oas3
GO:0051223	regulation of protein transport	417	0.358853	1.26463	0.0091591	0.0091591	0.0861667	1900	tags=24%, list=13%, signal=21%	Ifnb1/Cyp51/Tnf/Pfkl/Rab11fip1/Mmp13/Kcnn4/Anxa1/Sirt1/Mdm2/Chchd4/Txn1/Ran/Stxbp5/Cd81/Gripap1/Pik3r1/Bag3/Park7/Alox5/Lcp1/Hsp90aa1/Rest/Dynll1/Pdcd5/Myh9/Dnm1l/Ufm1/Nup62/Insig1/Adam9/Hsp90ab1/Per2/Ube2g2/Ccn3/Cd36/Kif5b/Vps35/Gpr68/Ppia/Ifi27/Oaz1/Ndfip2/Ptpmt1/Prkar1a/Cep290/Hif1a/Scfd1/Rhbdf2/Stx4a/Uqcc2/Camk1/Rab34/Ywhae/Bsg/Anxa7/Anp32b/Rufy3/Birc5/B3gat3/Eny2/Flna/Nr1h3/Tmem97/Slc7a11/Og…
GO:0061842	microtubule organizing center localization	33	0.65238	1.58805	0.00919304	0.00919304	0.0862871	2634	tags=48%, list=18%, signal=40%	Syne1/Cep83/Ift20/Arpc5/Ezr/Kif5b/Bicd2/Akap9/Fhod1/Pafah1b1/Mad2l1/Nin/Nubp1/Plxna2/Ints13/Dync1li2
GO:0070664	negative regulation of leukocyte proliferation	95	-0.59039	-1.51971	0.00920568	0.00920568	0.0862871	1495	tags=28%, list=10%, signal=26%	Ripor2/H2-Q10/Cd37/Laptm5/Itch/Mad1l1/Cd274/Casp3/Lgals9/Gstp1/Tnfrsf21/Zbtb7b/Bcl6/Cebpb/H2-K1/H2-D1/Fcgr2b/Pla2g2d/Lst1/H2-T22/Cd300a/H2-Q4/H2-Q6/H2-Q7/H2-T23/H2-Aa/Slfn1
GO:0098543	detection of other organism	20	-0.784852	-1.6317	0.00923712	0.00923712	0.0864232	567	tags=45%, list=4%, signal=43%	Ssc5d/H2-Q10/Naip5/H2-K1/Tlr1/H2-D1/H2-Q4/H2-Q6/H2-Q7
GO:0006082	organic acid metabolic process	663	0.32733	1.19606	0.00930371	0.00930371	0.0868872	1714	tags=18%, list=12%, signal=17%	Slc16a3/Aldoc/Edn1/Pgk1/Dhrs9/Pkm/Aldoa/Tpi1/Pfkl/Pgam1/Ass1/Mif/Pdk1/Atp2b4/Ldha/Nupr1/Eno1/Bdh2/Gapdh/Mgst3/Txnrd1/P4ha1/Anxa1/Egln1/Dbi/Odc1/Slc38a1/Grhpr/Sirt1/Gclm/Myc/Pdpn/Pfkp/Ndufab1/Fads1/Slc27a1/Pgd/Park7/Hsd17b12/Alox5/Adh5/Fabp5/Acsl1/Stard4/Abcd4/Gcsh/Insig1/Prxl2b/Per2/C3/Bcat2/Atf4/Gpi1/Oaz1/Alox5ap/Hif1a/Ptgr1/Mthfd2l/Galk1/Por/Mpc1/Slc23a2/Mtln/Pdzd11/Nfe2l1/Icmt/Hsd17b4/Atp7a/Gc…
GO:0090151	establishment of protein localization to mitochondrial membrane	25	0.708045	1.65009	0.00932598	0.00932598	0.0869362	1716	tags=48%, list=12%, signal=42%	Timm13/Hsp90aa1/Pdcd5/Timm10/Hspa4/Tomm40/Bax/Tomm70a/Samm50/Timm22/Cox18/Maip1
GO:1902850	microtubule cytoskeleton organization involved in mitosis	145	0.444591	1.38365	0.00935047	0.00935047	0.0870057	2973	tags=38%, list=20%, signal=31%	Plk2/Uhrf1/Vcp/Stmn1/Kif2a/Spdl1/Nup62/Chmp2b/Fam110a/Fbxw11/Itgb1/Mapre1/Birc5/Flna/Pafah1b1/Plk3/Smc3/Cdk5rap2/Rab11a/Spast/Tpr/Mad2l1/Chmp6/Ccsap/Parp3/Kat5/Rangrf/Kif3b/Tubg1/Tacc3/Ptpa/Cdca8/Spc25/Map4/Chmp2a/Bora/Nudc/Cenph/Tacc2/Zw10/Stil/Nsfl1c/Zfp207/Ints13/Tacc1/Wrap73/Kpnb1/Rae1/Rhoa/Ccnb1/Cdk1/Dync1h1/Poldip2/Dctn1/Cenpe
GO:0018193	peptidyl-amino acid modification	735	0.328249	1.21507	0.00939583	0.00939583	0.0872688	1786	tags=18%, list=12%, signal=17%	Ifnb1/Cdk5r1/Dyrk3/Lrp8/Cspg4/Qpct/Tnf/Plk2/Mif/Ifih1/Atp2b4/Abl2/Cass4/Ppp1r15a/Areg/Gadd45a/P4ha1/Egln1/Ercc6/Itga5/Zdhhc18/Sirt1/Fkbp2/Galnt6/Smad7/Fnip2/Fkbp4/Cd24a/Chchd4/Tollip/Txn1/Stk38l/Spred2/Cdc42bpg/Ndufab1/Pdgfa/Sae1/Rap2b/Zfp451/Adam17/Oxsr1/Park7/Galnt2/Adh5/Cab39/Ppp2r5b/Gcsh/Mvp/Cd36/Ppia/Ripk2/Spred1/Lonp1/Eif4g1/Dph6/Itgb1/Kmt5a/Dhps/Dph3/Camk1/Ncl/Lilrb4a/Rps6ka2/Bax/Suz12/Atp…
GO:0044058	regulation of digestive system process	19	-0.807502	-1.66456	0.00949233	0.00949233	0.0879737	169	tags=21%, list=1%, signal=21%	Dgat1/Nr1h2/Tifab/Aqp1
GO:0090100	positive regulation of transmembrane receptor protein serine/threonine kinase signaling pathway	82	-0.610518	-1.53613	0.00950616	0.00950616	0.0879737	1558	tags=24%, list=11%, signal=22%	Tgfb1i1/Got1/Snw1/Sulf1/Pparg/Flcn/Lgals9/Tgfbr2/Eng/Ep300/Acvrl1/Numa1/Notch2/Notch1/Cdkn1c/Kdr/Hes1/Thbs1/Tgfbr3/Cdh5
GO:0000819	sister chromatid segregation	206	0.421811	1.3776	0.00965205	0.00965205	0.0891623	3564	tags=39%, list=24%, signal=30%	Rrs1/Sirt1/Uhrf1/Ran/Kif2a/Spdl1/Nup62/Spc24/Chmp2b/Pinx1/Ncapg2/Smarca4/Cdt1/Actl6a/Mapre1/Birc5/Nek6/Flna/Smc3/Cdk5rap2/Anapc15/Zwint/Rab11a/Tpr/Mad2l1/Dync1li1/Espl1/Chmp6/Ncaph2/Ccsap/Nsmce2/Kat5/Rangrf/Kif3b/Wapl/Pcid2/Ppp2r1a/Tubg1/Tacc3/Cul3/Smc2/Cdca8/Smarca5/Spc25/Anapc7/Chmp2a/Smarcb1/Lcmt1/Nudc/Zw10/Zfp207/Chfr/Wrap73/Lats1/Vps4a/Smc4/Kpnb1/Mad2l1bp/Rhoa/Ccnb1/Cdk1/Poldip2/Bub1/Cdc6/Ar…
GO:0002821	positive regulation of adaptive immune response	118	-0.556348	-1.47096	0.00972616	0.00972616	0.0895594	1210	tags=25%, list=8%, signal=23%	P2rx7/H2-Q10/Slc11a1/Cd40/Zbtb1/Cd274/Sash3/H2-T24/Kmt5c/Tap2/Nfkbid/B2m/Fcgr3/Dennd1b/H2-K1/H2-D1/H2-M3/H2-T22/Arid5a/Fcgr1/H2-Q4/H2-Q6/Cd28/Ccr2/H2-Q7/H2-T23/H2-DMa/Cd74/H2-Ab1
GO:0097401	synaptic vesicle lumen acidification	15	0.781332	1.67419	0.00974009	0.00974009	0.0895594	1731	tags=67%, list=12%, signal=59%	Atp6v1h/Atp6v1a/Atp6v0a1/Atp6v1c1/Atp6v1f/Atp6v1e1/Atp6v1g1/Atp6ap2/Atp6v1d/Atp6v1b2
GO:0038094	Fc-gamma receptor signaling pathway	11	0.82423	1.67442	0.00974764	0.00974764	0.0895594	557	tags=27%, list=4%, signal=26%	Clec4d/Clec4e/Rapgef1
GO:1903729	regulation of plasma membrane organization	16	0.761512	1.65522	0.00977369	0.00977369	0.0896376	991	tags=44%, list=7%, signal=41%	S100a10/Anxa2/Gsn/Myh9/Asap1/Ahnak/Dnm2
GO:0045059	positive thymic T cell selection	14	-0.835058	-1.63584	0.00986421	0.00986421	0.0903056	134	tags=29%, list=1%, signal=28%	Cd1d1/Ptpn2/H2-DMa/Cd74
GO:0032731	positive regulation of interleukin-1 beta production	63	-0.65003	-1.57895	0.00991294	0.00991294	0.0905891	1086	tags=22%, list=7%, signal=21%	Mefv/Casp8/Gsdmd/Stat3/Myd88/Naip5/Ifi204/Ccr5/Ifi203/Mndal/Ifi211/Ifi209/Ifi206/Ifi213
GO:1903524	positive regulation of blood circulation	27	0.684817	1.62626	0.00993064	0.00993064	0.0905891	1283	tags=22%, list=9%, signal=20%	Edn1/Sirt1/Adrb2/Atp1a1/Gch1/Pde4d
GO:0098926	postsynaptic signal transduction	42	-0.679061	-1.55733	0.00997787	0.00997787	0.0907166	636	tags=19%, list=4%, signal=18%	Sorbs2/Rgs10/Stat3/Orai1/Ly6e/Ly6a/Ly6c1/Ly6h
GO:0032411	positive regulation of transporter activity	65	0.540581	1.50472	0.0099975	0.0099975	0.0907166	965	tags=17%, list=7%, signal=16%	Arc/Edn1/Calm3/Adrb2/Park7/Hspa2/Nedd4l/Calm1/Stac2/Atp7a/Akap9
GO:1903828	negative regulation of protein localization	199	0.416044	1.34942	0.0100304	0.0100304	0.0907166	1841	tags=23%, list=12%, signal=20%	Ifnb1/Cyp51/Plk2/Pfkl/Rab11fip1/Anxa1/Sirt1/Vcp/Txn1/Gripap1/Bag3/Park7/Rest/Ufm1/Insig1/Ppfia1/Ube2g2/Ccn3/Cd36/Vps35/Ndfip2/Ptpmt1/Nedd4l/Rhbdf2/Bcl2l1/Lilrb4a/Eny2/Nr1h3/Anxa5/Dab2/Hmgcr/Rangap1/Gsk3b/Tmed2/Rsad2/Ptpn11/Ap2m1/Rock2/Idh2/Ndufaf2/App/Commd1/Sfrp1/Map4k4/Snx3
GO:0051701	biological process involved in interaction with host	114	-0.559597	-1.47505	0.0100483	0.0100483	0.0907166	1081	tags=24%, list=7%, signal=22%	Nrp1/Trim11/Trim34a/Trim8/Gbp7/Nectin4/Vps37b/Grk2/Siglec1/Trim25/Insr/Trim12a/Naip5/Scarb1/Dynlt1f/Gbp3/Trim12c/Trim30a/Gbp2/Trim30d/Gbp9/Ly6e/Ifitm3/Axl/Cd74/Cav1/Ciita
GO:0006605	protein targeting	253	0.397412	1.33441	0.0100502	0.0100502	0.0907166	2090	tags=26%, list=14%, signal=22%	Cdk5r1/Ccl2/Itgam/Zdhhc18/Hspa5/Timm13/Chchd4/Ubl4a/M6pr/Bag3/Hras/Hsp90aa1/Hspd1/Pdcd5/Sgta/Cib1/Timm10/Gipc1/Man1a/Timm8a1/Pxk/Hspa4/Srp9/Tomm40/Srp14/Spcs3/Timm17a/Pmpca/Ywhae/Sec61b/Sec63/Smurf1/Tomm70a/Dnlz/Timm17b/Pam16/Timm23/Oga/Rab7/Vps13a/Macf1/Spcs2/Vamp7/Grpel1/Samm50/Pex16/Dnajc19/Ywhab/Arpc2/Pex1/Timm22/Tomm20/Srp19/Zdhhc20/Syngr1/Rpl11/Hspa8/Erbin/Zdhhc14/Srp72/Mff/Micall1/Fyn/Bag6…
GO:0032651	regulation of interleukin-1 beta production	92	-0.596777	-1.52048	0.0100512	0.0100512	0.0907166	1318	tags=22%, list=9%, signal=20%	Ifi214/Rad21/Cx3cr1/Mefv/Casp8/Gsdmd/Gstp1/Elf4/Stat3/Myd88/Naip5/Ifi204/Pml/Ccr5/Ifi203/Mndal/Ifi211/Ifi209/Ifi206/Ifi213
GO:0099111	microtubule-based transport	172	0.435223	1.38443	0.0100825	0.0100825	0.0908331	3249	tags=31%, list=22%, signal=25%	Tuba1a/Ift20/Dst/Dynll1/Arl8b/Kif5b/Arhgap21/Bicd2/Sfpq/Fbxw11/Hif1a/Hsbp1/Ssx2ip/Rab21/Spg7/Pafah1b1/Vamp7/Spast/Arl3/Borcs8/App/Borcs7/Ssna1/Kif3b/Rhot1/Stau2/Cdc42/Kif3a/Ift46/Dnaaf2/Ift27/Arl8a/Ap3m1/Actr10/Rab1a/Ift43/Stard7/Dync1i2/Ift52/Trak2/Bloc1s2/Cluap1/Dync1h1/Cep131/Kif1b/Flot2/Dtnbp1/Mgarp/Dnajb13/Kif1c/Ift122/Hnrnpu/Ofd1/Kif1a
GO:0030856	regulation of epithelial cell differentiation	121	-0.571603	-1.52051	0.0100996	0.0100996	0.0908331	592	tags=17%, list=4%, signal=16%	Csf1r/Acvrl1/Numa1/Tnfrsf1a/Stat5b/F11r/Btg1/Cdkn1b/Foxj2/Cebpb/Vegfa/Zfp36/Notch1/Cdkn1c/Wwtr1/Zeb1/Hes1/Cav1/Cldn5/Cdh5
GO:0090201	negative regulation of release of cytochrome c from mitochondria	21	0.70614	1.61048	0.0102024	0.0102024	0.0915957	1268	tags=33%, list=9%, signal=31%	Higd1a/Lmna/Prelid1/Bcl2l1/Bak1/Fxn/Psmd10
GO:0032815	negative regulation of natural killer cell activation	16	-0.819772	-1.62154	0.0102597	0.0102597	0.0919493	407	tags=50%, list=3%, signal=49%	Lgals9/H2-K1/H2-D1/H2-T22/H2-Q4/H2-Q6/H2-Q7/H2-T23
GO:0030099	myeloid cell differentiation	414	-0.44557	-1.34154	0.01029	0.01029	0.0920594	1425	tags=20%, list=10%, signal=19%	Gab3/Rabgap1l/Zfp36l1/Lbr/Clec2d/Sp3/Ifi214/Nfatc1/Pknox1/Dnase2a/Ncoa6/Pparg/Rarg/Il15/C1qc/Cebpg/Casp3/Lmo2/Cebpa/Casp8/Kmt2e/Pip4k2a/Tgfbr2/Tob2/Klf10/Sh2b3/Kat6a/Arid4a/Ikzf1/Hhex/Fli1/Maf/Csf1r/Ep300/Evi2/Thra/Mef2c/Ucp2/Exoc6/Stat3/Myd88/Foxo3/B2m/Adar/Trib1/Nedd9/Stat5b/Mfap2/Rac2/Bcl6/Klf2/Cebpb/Zfp385a/Junb/Rara/Notch2/Vegfa/Fos/Csf3r/Nrros/Zfp36/Ifi204/Fosl2/Cdkn1c/Pml/Irf8/Sbno2/Trf/Pi…
GO:0032945	negative regulation of mononuclear cell proliferation	89	-0.594747	-1.50231	0.0103092	0.0103092	0.0920696	1495	tags=29%, list=10%, signal=26%	Ripor2/H2-Q10/Cd37/Laptm5/Itch/Mad1l1/Cd274/Casp3/Lgals9/Tnfrsf21/Zbtb7b/Bcl6/Cebpb/H2-K1/H2-D1/Fcgr2b/Pla2g2d/Lst1/H2-T22/Cd300a/H2-Q4/H2-Q6/H2-Q7/H2-T23/H2-Aa/Slfn1
GO:0072009	nephron epithelium development	83	-0.596829	-1.49839	0.0103608	0.0103608	0.0923692	666	tags=14%, list=5%, signal=14%	Mef2c/Ctns/Pbx1/Notch2/Vegfa/Notch1/Wwtr1/Hes1/Heyl/Lama5/Aqp1/Agtr2
GO:2000767	positive regulation of cytoplasmic translation	11	0.821747	1.66938	0.0103921	0.0103921	0.0924864	1198	tags=45%, list=8%, signal=42%	Pkm/Syncrip/Ybx1/Hnrnpd/Dhx9
GO:0022011	myelination in peripheral nervous system	29	0.658402	1.57727	0.0104457	0.0104457	0.0926406	453	tags=17%, list=3%, signal=17%	Plec/Ndrg1/Pou3f1/Adgrg6/Pmp22
GO:0032292	peripheral nervous system axon ensheathment	29	0.658402	1.57727	0.0104457	0.0104457	0.0926406	453	tags=17%, list=3%, signal=17%	Plec/Ndrg1/Pou3f1/Adgrg6/Pmp22
GO:0098581	detection of external biotic stimulus	29	-0.738527	-1.61389	0.0104958	0.0104958	0.0929232	567	tags=48%, list=4%, signal=47%	Ssc5d/Tlr4/Lbp/H2-Q10/Naip5/Scarb1/Nr4a1/H2-K1/Tlr1/H2-D1/Ly96/H2-Q4/H2-Q6/H2-Q7
GO:0090066	regulation of anatomical structure size	447	-0.446169	-1.35121	0.0105846	0.0105846	0.0935482	1187	tags=12%, list=8%, signal=12%	Smpd3/Nrp1/Ednra/Ccl11/Pum2/Sod1/Itga4/Clasp2/Dusp5/Slc12a9/Ulk1/Grk2/Ifrd1/Plekhg2/Sptbn1/Sema6d/Tbxas1/Arhgap18/Egfr/Sema6b/Ptgs1/Mgll/Lrrc8a/Ep300/Dip2b/P2rx4/Atp13a2/Slc12a6/Ccl24/Klf2/Ssh2/Map3k1/Evl/Rin3/Sema4a/Vegfa/Svil/Kdr/Mmp2/Itga1/Ccr5/Tgfbr3/Apoe/Cxcl12/Ace/Pecam1/Cav1/Cd38/Rgma/Clec2i/Atp1a2/Esam/C1qtnf9/Aqp1/Agtr2
GO:0071559	response to transforming growth factor beta	216	-0.504559	-1.43245	0.0106863	0.0106863	0.0942837	1253	tags=18%, list=8%, signal=17%	Kmt2a/Htra3/Pparg/Tnrc6c/Flcn/Fut8/Fermt2/Pxn/Zyx/Apaf1/Lgals9/Lpxn/Tgfbr2/Zfp36l2/Gcnt2/Arid4a/Eng/Ep300/Mef2c/Stat3/Acvrl1/Dusp22/Map3k1/Bambi/Fos/Nrros/Cdkn1c/Pml/Zeb1/Thbs1/Tgfbr3/Peg10/Hpgd/Ltbp4/Col4a2/Cav1/Nrep/Cldn5/Cdh5
GO:0048593	camera-type eye morphogenesis	105	-0.571361	-1.4901	0.0107531	0.0107531	0.0947093	861	tags=11%, list=6%, signal=11%	Arid1a/Ikzf1/Stat3/Sox4/Notch2/Vegfa/Notch1/Kdr/Zeb1/Rpgrip1/Flt1/Aqp1
GO:0031663	lipopolysaccharide-mediated signaling pathway	55	-0.656967	-1.56935	0.0108478	0.0108478	0.0953786	635	tags=25%, list=4%, signal=24%	Cd14/Myd88/Trib1/Trim12a/Irak2/Tut4/Trim12c/Ly96/Trim30a/Ly86/Stat1/Trim30d/Tifab/Scimp
GO:0097061	dendritic spine organization	91	0.506885	1.49193	0.010916	0.010916	0.0958137	1196	tags=15%, list=8%, signal=14%	Cdk5r1/Arc/Lrp8/Baiap2/Abl2/Pdlim5/Dnm1l/Dock10/Vps35/Caprin2/Caprin1/Dbnl/Cfl1/Pafah1b1
GO:1903557	positive regulation of tumor necrosis factor superfamily cytokine production	114	-0.556127	-1.4659	0.0109465	0.0109465	0.0959162	735	tags=24%, list=5%, signal=23%	Csf1r/Stat3/Cd14/Myd88/Zbtb20/Tnfrsf1a/Fcgr3/Ifngr1/H2-K1/Tlr1/H2-D1/Fcgr2b/Ly96/Akap12/Ptafr/H2-T22/Arid5a/Oas2/Thbs1/Ccr5/H2-Q4/H2-Q6/Ccr2/H2-Q7/H2-T23/Oas1g/Oas3
GO:0050792	regulation of viral process	156	-0.542514	-1.48908	0.0110069	0.0110069	0.0961337	595	tags=21%, list=4%, signal=20%	Trim25/Adar/Znfx1/Trim12a/Dynlt1f/Map3k1/Trim12c/Rnasel/Bst2/Zfp36/Notch1/Ifi204/Trim30a/Oas2/Cxcr4/Stat1/Trim30d/Ifi203/Sp100/Oasl2/Ly6e/Mndal/Ifitm3/Ifi211/Axl/Ifi209/Cd74/Oas1g/Oas3/Ciita/Ifi206/Ifi213
GO:0032612	interleukin-1 production	111	-0.5707	-1.49694	0.0110089	0.0110089	0.0961337	1109	tags=20%, list=8%, signal=18%	Ifi214/Rad21/Cx3cr1/Mefv/Lgals9/Casp8/Gsdmd/Gstp1/Elf4/Stat3/Myd88/Naip5/Ifi204/Pml/Ccr5/Ifi203/Mndal/Ifi211/Ifi209/Il16/Ifi206/Ifi213
GO:0051100	negative regulation of binding	133	-0.543619	-1.47102	0.0110296	0.0110296	0.0961496	610	tags=11%, list=4%, signal=10%	B2m/Mitd1/Cdkn1a/Ifi204/Ifi203/Sp100/Mndal/Ifi211/Ifi209/Nfib/Ifit2/Rgma/Ifi206/Ifi213
GO:0007260	tyrosine phosphorylation of STAT protein	58	-0.648988	-1.56425	0.0111654	0.0111654	0.097003	1210	tags=24%, list=8%, signal=22%	Cd40/Il15/Il6ra/Csf1r/Osm/Tnfrsf1a/Il6st/Parp14/Hes1/Parp9/Irf1/Pecam1/Tslp/Cav1
GO:1905939	regulation of gonad development	12	0.806154	1.65576	0.0111654	0.0111654	0.097003	157	tags=25%, list=1%, signal=25%	Nupr1/Cited2/Wnt4
GO:0035307	positive regulation of protein dephosphorylation	39	-0.706771	-1.60893	0.0113326	0.0113326	0.0982882	469	tags=26%, list=3%, signal=25%	Cnep1r1/Pink1/Gna12/Vrk3/Ankle2/Itga1/Cd300a/Pdgfrb/Agtr2/Cdh5
GO:0032640	tumor necrosis factor production	183	-0.515718	-1.45027	0.0113588	0.0113588	0.0983482	1445	tags=26%, list=10%, signal=24%	Lbp/Tbc1d23/H2-Q10/Cybb/Spon2/Oas1a/Rad21/Syk/Sash3/Cx3cr1/Lgals9/Cd47/Gstp1/Frmd8/Csf1r/Elf4/C5ar2/Stat3/Cd14/Myd88/Zbtb20/Tnfrsf1a/Fcgr3/Ifngr1/Rara/H2-K1/Tlr1/H2-D1/Fcgr2b/Ly96/Zfp36/Akap12/Trim30a/Ptafr/Bcl3/H2-T22/Arid5a/Oas2/Thbs1/Ccr5/H2-Q4/H2-Q6/Ccr2/H2-Q7/Axl/H2-T23/Oas1g/Oas3
GO:0045745	positive regulation of G protein-coupled receptor signaling pathway	18	0.734976	1.5995	0.0114082	0.0114082	0.098602	688	tags=22%, list=5%, signal=21%	Edn1/Myh9/C3/Hif1a
GO:0006906	vesicle fusion	99	0.487506	1.45633	0.0114267	0.0114267	0.098602	2403	tags=31%, list=16%, signal=26%	Stx11/Diaph3/Eea1/Anxa1/Stx3/Uso1/Erc1/Rab8b/Chmp2b/Arl8b/Kif5b/Stx4a/Gnai3/Syt11/Stx8/Rab34/Tom1/Rab7/Vamp7/Coro1a/Sec22b/Tbc1d4/Chmp6/Cav2/Vti1b/Vav3/Snap47/Chmp2a/Rab12/Stx2/Pip4k2b
GO:1905332	positive regulation of morphogenesis of an epithelium	29	-0.734826	-1.60581	0.011526	0.011526	0.0991208	394	tags=38%, list=3%, signal=37%	Mmrn2/Tgfb1/Ar/Abl1/Mdk/Smo/Six1/Pik3cd/Vegfa/Pdgfra/Agtr2
GO:0006006	glucose metabolic process	167	0.430778	1.36456	0.0115409	0.0115409	0.0991208	1654	tags=25%, list=11%, signal=22%	Aldoc/Pgk1/Pkm/Aldoa/Tpi1/Tnf/Pfkl/Pgam1/Pdk1/Ldha/Eno1/Gapdh/Sirt1/Myc/Pgm1/Pfkp/Pik3r1/Pgp/Fabp5/Per2/Atf4/Gpi1/Hif1a/Pgm2l1/Nln/Nfe2l1/Pdk3/Ddb1/Pik3ca/Hk3/Acadm/Mdh2/Gpt2/Ppp4r3a/Epm2aip1/Trp53/Slc25a13/Hk1/Slc25a11/Ranbp2/Ppp1r3e
GO:0006397	mRNA processing	440	0.35627	1.25798	0.011545	0.011545	0.0991208	3374	tags=37%, list=23%, signal=29%	Snrpa1/Lsm4/Lgals3/Txnl4a/Snrnp25/Rest/Ncbp2/Cdk12/Syncrip/Ppp4r2/Ddx1/Srsf3/Sfpq/Hnrnpa2b1/C1qbp/Safb2/Zcrb1/Fam50a/Srsf2/Gcfc2/Snrnp70/Ncl/Ybx1/Prdx6/Srsf1/Jmjd6/Snrpd1/Thoc6/Hnrnpul2/Cwc15/Srsf10/Rbm4/Ddx41/Prpf40a/Srek1/Sde2/Prpf39/Mbnl2/Rngtt/Srpk2/Dhx9/Sympk/Dhx15/Srsf7/Sf3b3/Rbm39/Snrpa/Pabpn1/Strap/Ppil1/Srpk1/Cdc73/Dyrk1a/Puf60/Ddx23/Scaf4/Lsm2/Rbm14/Smn1/Lsm1/Npm1/Ddx46/Tardbp/Cd2bp2/Sf…
GO:0006816	calcium ion transport	314	-0.46223	-1.36201	0.011588	0.011588	0.0993231	755	tags=9%, list=5%, signal=9%	Slc30a1/Tmem37/P2rx4/Slc8b1/Pde4b/Orai1/Orai3/Zfas1/Ddit3/Ramp1/Pml/Hes1/Cxcr4/Ccr5/Gpr35/Pdgfrb/Tspan13/Mylk/Clec4b1/Cxcl12/Atp2a1/Ace/Il16/Cxcl9/Cav1/Atp1a2/Ramp2/Aplnr
GO:0002710	negative regulation of T cell mediated immunity	19	0.726544	1.59582	0.0116459	0.0116459	0.099393	227	tags=16%, list=2%, signal=16%	Ifnb1/Spn/Smad7
GO:0001937	negative regulation of endothelial cell proliferation	38	-0.706424	-1.60674	0.011646	0.011646	0.099393	734	tags=24%, list=5%, signal=23%	Eng/Mef2c/Acvrl1/Thbs1/Stat1/Apoe/Flt1/Cav1/Dlk1
GO:0019934	cGMP-mediated signaling	21	-0.778285	-1.62508	0.0116562	0.0116562	0.099393	231	tags=29%, list=2%, signal=28%	Pde3a/Pde2a/Cgas/Thbs1/Apoe/Aqp1
GO:0032611	interleukin-1 beta production	96	-0.593716	-1.52664	0.011674	0.011674	0.099393	1318	tags=21%, list=9%, signal=19%	Ifi214/Rad21/Cx3cr1/Mefv/Casp8/Gsdmd/Gstp1/Elf4/Stat3/Myd88/Naip5/Ifi204/Pml/Ccr5/Ifi203/Mndal/Ifi211/Ifi209/Ifi206/Ifi213
GO:0140962	multicellular organismal-level chemical homeostasis	54	-0.650938	-1.55065	0.0117057	0.0117057	0.0994966	610	tags=26%, list=4%, signal=25%	Inpp5k/Ireb2/Slc11a1/Oas1a/Fbxl5/B2m/Ctns/Ctsh/Vegfa/Napsa/Kdr/Slc40a1/Oas1g/Aqp1
GO:0022900	electron transport chain	91	0.503728	1.48264	0.0117477	0.0117477	0.0995201	3501	tags=53%, list=24%, signal=40%	Plec/Park7/Sod2/Cox5a/Ndufb8/Coq7/Ndufb9/Fdx2/Fdx1/Ndufb6/Por/Ndufa8/Ndufs8/Etfb/Cox4i1/Uqcrq/Chchd2/Ndufs7/Uqcr11/Ndufv2/Mybbp1a/Cox7b/Ndufs6/Slc25a13/Ndufs1/Ndufs4/Iscu/Sco2/Ndufc2/Etfdh/Afg1l/Sdhc/Dld/Cox6a1/Ndufv3/Cox7a2/Ccnb1/Cdk1/Cycs/Ndufa10/Ndufb3/Ndufa12/Cox5b/Ndufv1/Slc1a3/Dnajc15/Cyc1/Mtch2
GO:0006997	nucleus organization	123	0.469786	1.43469	0.0117592	0.0117592	0.0995201	1845	tags=21%, list=13%, signal=19%	Dyrk3/Plec/Nup107/Sirt1/Lmna/Syne1/Agfg1/Ahctf1/Brox/Bin1/Chmp2b/Nfe2l1/Agap3/Srpk2/Pafah1b1/Hmgb2/Nolc1/Selenof/Spast/Tardbp/Banf1/Chmp6/Tbpl1/Kat5/Bend3/Lemd2
GO:0090313	regulation of protein targeting to membrane	31	0.650343	1.57659	0.0117669	0.0117669	0.0995201	507	tags=16%, list=3%, signal=16%	Cdk5r1/Ccl2/Itgam/Hras/Cib1
GO:0001822	kidney development	250	-0.497274	-1.43691	0.0118318	0.0118318	0.0999035	666	tags=10%, list=5%, signal=10%	Mef2c/Gatm/Sox4/Ctns/Adamts1/Aph1c/Pbx1/Rara/Bicc1/Notch2/Vegfa/Notch1/Cdkn1c/Wwtr1/Hes1/Id3/Cxcr4/Pdgfrb/Nid1/Pdgfra/Ace/Notch3/Heyl/Lama5/Aqp1/Agtr2
GO:0038093	Fc receptor signaling pathway	14	0.761673	1.60734	0.0119573	0.0119573	0.100797	557	tags=21%, list=4%, signal=21%	Clec4d/Clec4e/Rapgef1
GO:0003272	endocardial cushion formation	22	-0.784797	-1.63914	0.0120391	0.0120391	0.101319	895	tags=23%, list=6%, signal=21%	Tgfbr2/Eng/Notch1/Heyl/Aplnr
GO:2000311	regulation of AMPA receptor activity	12	0.802663	1.64859	0.0121157	0.0121157	0.101796	372	tags=25%, list=3%, signal=24%	Arc/Shisa9/Adrb2
GO:0050866	negative regulation of cell activation	190	-0.498216	-1.40255	0.0121442	0.0121442	0.101868	1404	tags=32%, list=10%, signal=29%	Ndfip1/Ptpn2/Cblb/Gimap5/Vsir/Milr1/Mdk/Loxl3/Tmem131l/Rassf5/Prkcd/Cd200/Runx3/Ripor2/H2-Q10/Cd37/Laptm5/Itch/Mad1l1/Pparg/Cd274/Nr1d1/Casp3/Serpine2/Lgals9/Sh2b3/Bank1/Samsn1/Tnfrsf21/Tnfaip8l2/Fbxo7/Zbtb7b/Nfkbid/C1qtnf1/Dusp22/Il4ra/Bcl6/Hlx/Cebpb/H2-K1/H2-D1/Fcgr2b/Pla2g2d/Mertk/Fgl2/Lst1/H2-T22/Irf1/Cd300a/Cygb/H2-Q4/H2-Q6/H2-Q7/Pdgfra/Axl/H2-T23/Apoe/Cd74/H2-Aa/Slfn1
GO:0022406	membrane docking	74	0.525261	1.49545	0.012337	0.012337	0.103174	2805	tags=43%, list=19%, signal=35%	Stx11/Stx3/Exoc5/Cep83/Uso1/Ykt6/Rab8b/Ralb/Cep290/Stx4a/Calm1/Atp2a2/Stx8/Vapa/Exoc6b/Rab7/Rab3d/Pex16/Cav2/Snx3/Esyt1/Rock1/Pacs2/Exoc3/Vapb/Rab12/Stx2/Stxbp3/Ahcyl1/Camk2a/Vamp8/Pdzd8
GO:1902042	negative regulation of extrinsic apoptotic signaling pathway via death domain receptors	24	0.708291	1.63717	0.01235	0.01235	0.103174	1511	tags=38%, list=10%, signal=34%	Serpine1/Cflar/Hmox1/Park7/Pea15a/Bcl2l1/Hmgb2/Gsk3b/Faim
GO:0016045	detection of bacterium	19	-0.79727	-1.64346	0.0123605	0.0123605	0.103174	567	tags=47%, list=4%, signal=46%	Ssc5d/H2-Q10/Naip5/H2-K1/Tlr1/H2-D1/H2-Q4/H2-Q6/H2-Q7
GO:0010763	positive regulation of fibroblast migration	22	-0.783527	-1.63649	0.0124519	0.0124519	0.103767	346	tags=18%, list=2%, signal=18%	Ddr2/Akap12/Thbs1/Aqp1
GO:0050708	regulation of protein secretion	234	0.394301	1.30386	0.0125266	0.0125266	0.104054	1644	tags=20%, list=11%, signal=18%	Ifnb1/Cyp51/Tnf/Pfkl/Rab11fip1/Mmp13/Kcnn4/Anxa1/Sirt1/Stxbp5/Alox5/Rest/Dynll1/Myh9/Dnm1l/Adam9/Per2/Ccn3/Kif5b/Vps35/Gpr68/Ppia/Ptpmt1/Prkar1a/Hif1a/Rhbdf2/Stx4a/Uqcc2/Rab34/Bsg/Anxa7/Birc5/Eny2/Nr1h3/Oga/Glud1/Anxa5/Clock/Mpc2/Hmgcr/Rsad2/Tardbp/Ptpn11/Tlr2/Idh2/Ndufaf2
GO:0060760	positive regulation of response to cytokine stimulus	57	-0.645714	-1.5533	0.012527	0.012527	0.104054	443	tags=23%, list=3%, signal=22%	Crebrf/Parp14/Igtp/Irgm2/Parp9/Cxcr4/Nlrc5/Irgm1/Axl/Cd74/Zbp1/Tslp/Irf7
GO:0106056	regulation of calcineurin-mediated signaling	38	0.608841	1.52798	0.0126243	0.0126243	0.1046	2606	tags=34%, list=18%, signal=28%	Tnf/Rcan1/Atp2b4/Nfat5/Cib1/Homer3/Gsk3b/Cherp/Dyrk2/Plcg2/Camta1/Mtor/Igf1
GO:2001026	regulation of endothelial cell chemotaxis	19	-0.796469	-1.64181	0.0126336	0.0126336	0.1046	685	tags=42%, list=5%, signal=40%	Snai2/Sema5a/P2rx4/Vegfa/Notch1/Kdr/Smoc2/Thbs1
GO:0016032	viral process	284	-0.47318	-1.38713	0.0127062	0.0127062	0.10503	1081	tags=18%, list=7%, signal=17%	Trim11/Isg20/Trim34a/Zdhhc9/Trim8/Tfap4/Pcbp2/Nectin4/Vps37b/Grk2/Usf1/Eif2ak2/Csf1r/Siglec1/Ep300/Rab43/Trim25/Insr/Adar/Znfx1/Trim12a/Dynlt1f/Map3k1/Trim12c/Rnasel/Bst2/Zfp36/Notch1/Ifi204/Trim30a/Oas2/Cxcr4/Stat1/Trim30d/Ifi203/Sp100/Oasl2/Ly6e/Mndal/Ifitm3/Ifi211/Axl/Apoe/Ifi209/Cd74/Oas1g/Cav1/Oas3/Ciita/Ifi206/Ifi213
GO:0060562	epithelial tube morphogenesis	300	-0.461126	-1.35959	0.0128584	0.0128584	0.106116	1184	tags=15%, list=8%, signal=14%	Nfatc1/Sema5a/Nrp1/Rarg/Ednra/Ccl11/Kdm5b/Ccm2/Pxn/Casp3/Apaf1/Ncoa3/Casp8/Tgfbr2/Tgif1/Arid1a/Rasip1/Stk4/Hhex/Eng/Mthfr/Mef2c/Rhob/Acvrl1/Ctns/Ctsh/Pbx1/Rara/Notch2/Pik3cd/Lrp5/Vegfa/Notch1/Pml/Kdr/Hes1/Cxcr4/Adamts12/Pdgfra/Cxcl12/Col4a1/Flt1/Rgma/Lama5/Aplnr/Agtr2
GO:0033993	response to lipid	579	-0.421164	-1.30026	0.012903	0.012903	0.106313	1448	tags=19%, list=10%, signal=18%	P2rx7/Lbp/Tnfrsf1b/Zfp36l1/Pde2a/Slc11a1/Abhd2/Tie1/Trim41/Spon2/Hadhb/Lpar1/Epha3/Pparg/Rarg/Cd274/Syk/Ednra/Ticam2/Trerf1/Nr1d1/Cx3cr1/Dab2ip/Tfap4/Litaf/Lgals9/Ncoa3/Gstp1/Per1/Abca1/Tgfbr2/Zfp36l2/Arid1a/Fibin/Egfr/Sult1a1/Plscr4/Pck2/Pim1/Ncoa2/Eif2ak2/Idh1/Klf9/Peg13/Pdcd4/P2ry6/Nrip1/Ep300/Mef2c/Stat3/Cd14/Myd88/Pde4b/Foxo3/B2m/Gpr155/Trib1/Trim12a/Stat5b/Scarb1/Synj1/Irak2/Ctsh/Gbp3/Gramd…
GO:0002827	positive regulation of T-helper 1 type immune response	16	-0.80953	-1.60128	0.0129485	0.0129485	0.106516	247	tags=25%, list=2%, signal=25%	Slc11a1/Arid5a/Ccr2/H2-Ab1
GO:0090092	regulation of transmembrane receptor protein serine/threonine kinase signaling pathway	203	-0.49106	-1.38546	0.0130226	0.0130226	0.106876	808	tags=15%, list=5%, signal=14%	Htra3/Pparg/Flcn/Gdf3/Lgals9/Tgfbr2/Arid4a/Eng/Ep300/Gpr155/Acvrl1/Numa1/Sorl1/Bambi/Notch2/Nrros/Notch1/Tcf7l2/Cdkn1c/Kdr/Zeb1/Hes1/Thbs1/Nbl1/Tgfbr3/Peg10/Cav1/Rgma/Nrep/Cdh5
GO:0060041	retina development in camera-type eye	116	-0.552724	-1.45624	0.0130341	0.0130341	0.106876	994	tags=13%, list=7%, signal=12%	Rhoj/Tgif1/Ikzf1/Stat3/Acvrl1/Lrp5/Notch1/Mertk/Hes1/Rpgrip1/Nfia/Pdgfrb/Pdgfra/Nfib/Col4a1
GO:0033044	regulation of chromosome organization	228	0.399215	1.31105	0.0131293	0.0131293	0.107484	2973	tags=31%, list=20%, signal=25%	Mcm2/Sirt1/Lmna/Myc/Nat10/Nbn/Cct3/Spdl1/Spc24/Cct6a/Ten1/Pinx1/Cct2/Sfpq/Hnrnpa2b1/Smg5/Smarca4/Tcp1/Actl6a/Hnrnpd/Birc5/Senp6/Pphln1/Nek6/Gch1/Cct8/Cdk5rap2/Gnl3/Cct7/Anapc15/Zwint/Trp53/Tpr/Mad2l1/Dync1li1/Yy1/Nsmce2/Kat5/Ruvbl2/Wapl/Pcid2/Tacc3/Ino80c/Cct5/Cul3/Smc2/Cdca8/Dkc1/Smarca5/Spc25/Anapc7/Mphosph8/Parp1/Nfrkb/Smarcb1/Lcmt1/Zw10/Zfp207/Chfr/Smc4/Mad2l1bp/Ccnb1/Mcrs1/Cdk1/Morc2a/Bub1/C…
GO:0035794	positive regulation of mitochondrial membrane permeability	34	0.643588	1.58226	0.0132151	0.0132151	0.108013	1949	tags=44%, list=13%, signal=38%	Bnip3/Bcl2l1/Bax/Gclc/Bak1/Fxn/Spg7/Slc25a4/Siva1/Chchd10/Gsk3b/Trp53/Vdac2/Rhot1/Mul1
GO:0002444	myeloid leukocyte mediated immunity	96	-0.586537	-1.50818	0.0132607	0.0132607	0.108213	1179	tags=26%, list=8%, signal=24%	Vamp2/Syk/Ticam2/Cx3cr1/Ndst2/Kmt2e/Myd88/Rac2/Fcgr3/Il4ra/H2-K1/H2-D1/Fcgr2b/Cd300lb/Ptafr/H2-T22/Cd300a/Fcgr1/H2-Q4/H2-Q6/Ccr2/H2-Q7/Fcgr4/H2-T23/Ace
GO:0010923	negative regulation of phosphatase activity	20	0.720722	1.60398	0.0133158	0.0133158	0.108489	2254	tags=45%, list=15%, signal=38%	Tnf/Ppp1r15a/Ppp1r11/Rock2/Mastl/Ptpa/Rock1/Nckap1l/Ppp1r35
GO:0010958	regulation of amino acid import across plasma membrane	17	0.738169	1.59319	0.0133665	0.0133665	0.108556	1133	tags=29%, list=8%, signal=27%	Tnf/Slc38a1/Per2/Itgb1/Slc7a5
GO:1903789	regulation of amino acid transmembrane transport	17	0.738169	1.59319	0.0133665	0.0133665	0.108556	1133	tags=29%, list=8%, signal=27%	Tnf/Slc38a1/Per2/Itgb1/Slc7a5
GO:0009124	nucleoside monophosphate biosynthetic process	39	0.605227	1.52581	0.0134579	0.0134579	0.109125	1101	tags=26%, list=7%, signal=24%	Ampd3/Tk1/Nme1/Aprt/Nme2/Dut/Impdh1/Gmpr/Nudt2/Uck2
GO:0002082	regulation of oxidative phosphorylation	23	0.675209	1.5662	0.0135118	0.0135118	0.109142	1058	tags=35%, list=7%, signal=32%	Tnf/Nupr1/Myc/Vcp/Gadd45gip1/Uqcc2/Atp7a/Shmt2
GO:0031503	protein-containing complex localization	195	0.416347	1.34843	0.0135241	0.0135241	0.109142	2202	tags=23%, list=15%, signal=20%	Arc/Rala/Lmna/Stx3/Smad7/Fkbp4/Ran/Ap2s1/Gripap1/Ift20/Hras/Dynll1/Ezr/Abce1/Kif5b/Vps35/Ralb/Sfpq/Stx4a/Itgb1/Ssx2ip/Akap9/Birc5/Sacm1l/Eif6/Scrib/Gsk3b/Exoc3l4/Rab11a/Npm1/Arl3/Ap2m1/Rbm10/Ssna1/Kif3b/Stau2/Ift46/Nacc2/Xpo1/Lsg1/Ift27/Exoc3/Snap47/Sdad1/Ralgapa2
GO:0042274	ribosomal small subunit biogenesis	100	0.489307	1.46763	0.0135241	0.0135241	0.109142	2785	tags=40%, list=19%, signal=33%	Rrs1/Utp18/Nop56/Nat10/Rps19bp1/Mphosph10/Gtf2h5/Riok3/Nol7/Bysl/Imp4/Utp11/Utp6/Utp15/Wdr43/Rps7/Rrp7a/Rps5/Dcaf13/Nol11/Npm1/Rps27l/Tsr1/Nop14/Lsm6/Mrps7/Nom1/Utp20/Rpsa/Srfbp1/Bms1/Ddx52/Rps6/Rps24/Tbl3/Rps8/Wdr46/Rps3a1/Rps19/Fbl
GO:0170039	proteinogenic amino acid metabolic process	92	0.494557	1.46114	0.0135626	0.0135626	0.109264	1685	tags=24%, list=11%, signal=21%	Ass1/Atp2b4/Txnrd1/Slc38a1/Gclm/Gcsh/Atf4/Mthfd2l/Gclc/Got2/Shmt2/Slc7a11/Glud1/Mthfd1/Nit2/Scly/Spr/Qdpr/Gpt2/Oat/Asl/Dhfr
GO:0002712	regulation of B cell mediated immunity	61	-0.640838	-1.55352	0.0136115	0.0136115	0.109264	543	tags=20%, list=4%, signal=19%	Fcgr3/Bcl6/H2-K1/H2-D1/Fcgr2b/H2-T22/Fcgr1/H2-Q4/H2-Q6/Cd28/H2-Q7/H2-T23
GO:0002889	regulation of immunoglobulin mediated immune response	61	-0.640838	-1.55352	0.0136115	0.0136115	0.109264	543	tags=20%, list=4%, signal=19%	Fcgr3/Bcl6/H2-K1/H2-D1/Fcgr2b/H2-T22/Fcgr1/H2-Q4/H2-Q6/Cd28/H2-Q7/H2-T23
GO:1903900	regulation of viral life cycle	129	-0.532921	-1.43147	0.013631	0.013631	0.109264	682	tags=25%, list=5%, signal=24%	Trim11/Isg20/Trim34a/Trim8/Vps37b/Eif2ak2/Trim25/Adar/Znfx1/Trim12a/Trim12c/Rnasel/Bst2/Notch1/Ifi204/Trim30a/Oas2/Trim30d/Ifi203/Oasl2/Ly6e/Mndal/Ifitm3/Ifi211/Axl/Ifi209/Cd74/Oas1g/Oas3/Ciita/Ifi206/Ifi213
GO:0072337	modified amino acid transport	23	0.674441	1.56442	0.0136736	0.0136736	0.109264	168	tags=17%, list=1%, signal=17%	Slc22a4/Slc13a3/Slc6a8/Abcc1
GO:0071692	protein localization to extracellular region	312	0.379167	1.30149	0.0136869	0.0136869	0.109264	1644	tags=20%, list=11%, signal=18%	Ifnb1/Cyp51/Tnf/Pfkl/Rab11fip1/Mmp13/Kcnn4/Anxa1/Comp/Sirt1/Il1rn/Stxbp5/M6pr/Lyst/Park7/Alox5/Rest/Sel1l/Dynll1/Rab8b/Myh9/Dnm1l/Adam9/Per2/Ccn3/Ap1s1/Ccdc186/Kif5b/Vps35/Gpr68/Ppia/Ptpmt1/Prkar1a/Hif1a/Rhbdf2/Stx4a/Uqcc2/Rab34/Bsg/Anxa7/Birc5/Dand5/Eny2/Rbm4/Nr1h3/Oga/Steap3/Pafah1b1/Glud1/Rab3d/Anxa5/Clock/Mpc2/Hmgcr/Tmed2/Rsad2/Mttp/Tardbp/Ptpn11/Tlr2/Idh2/Ndufaf2
GO:0007219	Notch signaling pathway	144	-0.535462	-1.46044	0.0136889	0.0136889	0.109264	1249	tags=18%, list=8%, signal=17%	Mfng/Maml2/Sorbs2/Psenen/Dtx4/Cebpa/Tgfbr2/Enho/Hhex/Ptp4a3/Stat3/Acvrl1/Bcl6/Aph1c/Cdkn1b/Il6st/Notch2/Notch1/Dtx3l/Lfng/Dtx3/Hes1/Notch3/Heyl/Egfl7/Dlk1
GO:0051093	negative regulation of developmental process	781	-0.403111	-1.257	0.0137126	0.0137126	0.109272	1271	tags=15%, list=9%, signal=15%	Nfatc1/Sema4d/Sema5a/Pink1/Pparg/Flcn/Rflnb/Nrp1/Rarg/Fzd7/Ccl11/Tmem176a/Nr1d1/C1qc/Sod1/P2ry12/Trim11/Gdf3/Fermt2/Atxn2/Dab2ip/Lmo2/Hmg20a/Tcf4/Cebpa/Hopx/Ulk1/Ncoa3/Bicral/Ifrd1/Tgfbr2/Amot/Tob2/Sema6d/Zfp36l2/Stk4/Sh2b3/Egfr/Arid4a/Ccnd2/Hhex/Sema6b/Idua/Ctdsp1/Pdcd4/Csf1r/Fbxo7/Cst3/Dip2b/Runx1t1/Adipor1/Zbtb7b/Stat3/Foxo3/Nfkbid/B2m/Acvrl1/Trib1/Stat5b/Sox4/Tmem176b/Il4ra/Bcl6/Trp53inp1/Ada…
GO:0050852	T cell receptor signaling pathway	107	-0.574728	-1.50459	0.0137327	0.0137327	0.109272	621	tags=17%, list=4%, signal=16%	Tnfrsf21/Pde4b/Nfkbid/Dusp22/Dennd1b/Usp12/H2-K1/H2-D1/Fosl2/Icosl/Cd300a/Card11/H2-Q4/H2-Q6/Cd28/H2-Q7/Themis2/Clec2i
GO:0006865	amino acid transport	108	0.475961	1.43284	0.0137887	0.0137887	0.109547	1204	tags=17%, list=8%, signal=15%	Slc22a4/Tnf/Slc13a3/Slc6a8/Slc38a1/Myc/Il1rn/Gipc1/Per2/Slc7a1/Slc7a8/Itgb1/Nfe2l1/Slc7a5/Slc7a11/Lrrc8d/Lrrc8b/Slc16a10
GO:0002883	regulation of hypersensitivity	19	-0.793691	-1.63609	0.0138628	0.0138628	0.109965	543	tags=53%, list=4%, signal=51%	Fcgr3/H2-K1/H2-D1/Fcgr2b/H2-T22/Fcgr1/H2-Q4/H2-Q6/H2-Q7/H2-T23
GO:0051896	regulation of phosphatidylinositol 3-kinase/protein kinase B signal transduction	215	-0.501776	-1.42458	0.0139007	0.0139007	0.11009	1272	tags=18%, list=9%, signal=17%	Nox4/Sema4d/Sema5a/Flcn/Smpd3/Cx3cr1/P2ry12/Fermt2/Dab2ip/Serpine2/Gcnt2/Sh2b3/Bank1/Egfr/Csf1r/Eng/Hcst/Osm/P2rx4/Insr/Sesn1/C1qtnf1/Dcn/Ddit3/Hpse/Vegfa/Mertk/Tcf7l2/Vav2/Kdr/Gdf15/Thbs1/Pdgfrb/Cd28/Pdgfra/Axl/Cxcl12/Flt1/Igf2
GO:0003157	endocardium development	12	-0.844244	-1.62205	0.0139218	0.0139218	0.11009	856	tags=33%, list=6%, signal=31%	Stk4/Notch1/Kdr/Sox18
GO:0150076	neuroinflammatory response	72	0.526234	1.48236	0.0140227	0.0140227	0.110717	847	tags=12%, list=6%, signal=12%	Ifnb1/Tnf/Nupr1/Itgam/Kcnn4/Ldlr/Hspa4/Itgb1/Syt11
GO:0019058	viral life cycle	213	-0.492887	-1.39769	0.0140631	0.0140631	0.110865	1081	tags=19%, list=7%, signal=18%	Trim11/Isg20/Trim34a/Trim8/Pcbp2/Nectin4/Vps37b/Grk2/Eif2ak2/Siglec1/Rab43/Trim25/Insr/Adar/Znfx1/Trim12a/Trim12c/Rnasel/Bst2/Notch1/Ifi204/Trim30a/Oas2/Trim30d/Ifi203/Oasl2/Ly6e/Mndal/Ifitm3/Ifi211/Axl/Apoe/Ifi209/Cd74/Oas1g/Cav1/Oas3/Ciita/Ifi206/Ifi213
GO:0016072	rRNA metabolic process	238	0.388392	1.29339	0.0141917	0.0141917	0.111612	3065	tags=39%, list=21%, signal=31%	Rrs1/Utp18/Ercc6/Nat10/Nhp2/Ebna1bp2/Nol8/Pop5/Bop1/Mrto4/Smarca4/Mphosph10/Gtf2h5/Riok3/Ncl/Ddx54/Lyar/Nol7/Pop7/Bysl/Imp4/Utp11/Wdr12/Polr1d/Utp6/Top1/Utp15/Ddx21/Eif6/Sde2/Wdr43/Rps7/Rrp7a/Ftsj3/Mettl16/Rrp1/Brix1/Dcaf13/Pa2g4/Nol11/Trp53/Npm1/Tsr1/Nop14/Rrp12/Chd7/Lsm6/Mak16/Gtpbp4/Rpl14/Rpl11/Rpl10a/Utp20/Bud23/Znhit6/Dkc1/Rpf2/Rsl1d1/Utp14b/Pelp1/Srfbp1/Bms1/Rrp15/Rexo4/Smarcb1/Exosc9/Nsun5…
GO:0071639	positive regulation of monocyte chemotactic protein-1 production	15	-0.813335	-1.59975	0.0142016	0.0142016	0.111612	1301	tags=27%, list=9%, signal=24%	Oas1a/Syk/Oas1g/Oas3
GO:1903555	regulation of tumor necrosis factor superfamily cytokine production	179	-0.508827	-1.43008	0.0142435	0.0142435	0.111769	1445	tags=27%, list=10%, signal=24%	Lbp/Tbc1d23/H2-Q10/Cybb/Spon2/Oas1a/Rad21/Cd274/Syk/Sash3/Cx3cr1/Lgals9/Cd47/Gstp1/Csf1r/Elf4/C5ar2/Stat3/Cd14/Myd88/Zbtb20/Tnfrsf1a/Fcgr3/Ifngr1/Rara/H2-K1/Tlr1/H2-D1/Fcgr2b/Ly96/Zfp36/Akap12/Trim30a/Ptafr/Bcl3/H2-T22/Arid5a/Oas2/Thbs1/Ccr5/H2-Q4/H2-Q6/Ccr2/H2-Q7/Axl/H2-T23/Oas1g/Oas3
GO:0072528	pyrimidine-containing compound biosynthetic process	29	0.643462	1.54148	0.0143079	0.0143079	0.111869	2540	tags=41%, list=17%, signal=34%	Tk1/Nme1/Nme2/Dtymk/Dut/Uck2/Tbpl1/Tyms/Umps/Cmpk1/Nme6/Mtor
GO:0001938	positive regulation of endothelial cell proliferation	87	-0.594799	-1.50137	0.0143093	0.0143093	0.111869	767	tags=17%, list=5%, signal=16%	Ang/Stat3/Acvrl1/Ccl24/Hspg2/Nr4a1/Pik3cd/Vegfa/Kdr/Col18a1/Cxcl12/Cav1/Igf2/Egfl7/Aplnr
GO:0007179	transforming growth factor beta receptor signaling pathway	176	-0.517593	-1.45052	0.014322	0.014322	0.111869	1230	tags=19%, list=8%, signal=17%	Htra3/Pparg/Tnrc6c/Flcn/Fut8/Fermt2/Pxn/Zyx/Lgals9/Lpxn/Tgfbr2/Gcnt2/Arid4a/Eng/Ep300/Stat3/Acvrl1/Dusp22/Map3k1/Bambi/Fos/Nrros/Cdkn1c/Pml/Zeb1/Thbs1/Tgfbr3/Peg10/Hpgd/Ltbp4/Nrep/Cldn5/Cdh5
GO:0032652	regulation of interleukin-1 production	107	-0.573213	-1.50062	0.0144026	0.0144026	0.112166	1109	tags=21%, list=8%, signal=19%	Ifi214/Rad21/Cx3cr1/Mefv/Lgals9/Casp8/Gsdmd/Gstp1/Elf4/Stat3/Myd88/Naip5/Ifi204/Pml/Ccr5/Ifi203/Mndal/Ifi211/Ifi209/Il16/Ifi206/Ifi213
GO:0071706	tumor necrosis factor superfamily cytokine production	185	-0.505599	-1.42255	0.0144287	0.0144287	0.112166	1445	tags=26%, list=10%, signal=24%	Lbp/Tbc1d23/H2-Q10/Cybb/Spon2/Oas1a/Rad21/Cd274/Syk/Sash3/Cx3cr1/Lgals9/Cd47/Gstp1/Frmd8/Csf1r/Elf4/C5ar2/Stat3/Cd14/Myd88/Zbtb20/Tnfrsf1a/Fcgr3/Ifngr1/Rara/H2-K1/Tlr1/H2-D1/Fcgr2b/Ly96/Zfp36/Akap12/Trim30a/Ptafr/Bcl3/H2-T22/Arid5a/Oas2/Thbs1/Ccr5/H2-Q4/H2-Q6/Ccr2/H2-Q7/Axl/H2-T23/Oas1g/Oas3
GO:1903054	negative regulation of extracellular matrix organization	12	-0.842328	-1.61837	0.0144828	0.0144828	0.112166	1438	tags=58%, list=10%, signal=53%	Tnfrsf1b/Pparg/Cst3/Tnfrsf1a/Antxr1/Notch1/Tgfbr3
GO:0061003	positive regulation of dendritic spine morphogenesis	29	0.640198	1.53366	0.0144834	0.0144834	0.112166	1196	tags=24%, list=8%, signal=22%	Lrp8/Baiap2/Dnm1l/Caprin2/Caprin1/Dbnl/Pafah1b1
GO:1901550	regulation of endothelial cell development	18	-0.785003	-1.59785	0.0144916	0.0144916	0.112166	576	tags=28%, list=4%, signal=27%	Tnfrsf1a/F11r/Vegfa/Cldn5/Cdh5
GO:1903140	regulation of establishment of endothelial barrier	18	-0.785003	-1.59785	0.0144916	0.0144916	0.112166	576	tags=28%, list=4%, signal=27%	Tnfrsf1a/F11r/Vegfa/Cldn5/Cdh5
GO:0010656	negative regulation of muscle cell apoptotic process	54	0.556332	1.4926	0.014517	0.014517	0.112192	1881	tags=37%, list=13%, signal=32%	Edn1/Nupr1/Gapdh/Cflar/Hmox1/Sirt1/Pik3r1/Bag3/Pcmt1/Gch1/Slc25a4/Slc7a5/Atg5/Stub1/Hmgcr/Gsk3b/Npm1/Bcl2/Jak2/Atg7
GO:0002474	antigen processing and presentation of peptide antigen via MHC class I	32	-0.72867	-1.61292	0.0145488	0.0145488	0.112268	1127	tags=47%, list=8%, signal=43%	H2-T24/Tapbpl/Tap2/B2m/Fcgr3/H2-K1/H2-D1/Tap1/H2-M3/H2-T22/Fcgr1/H2-Q4/H2-Q6/H2-Q7/H2-T23
GO:0019752	carboxylic acid metabolic process	652	0.334387	1.22386	0.0145877	0.0145877	0.112398	1714	tags=18%, list=12%, signal=17%	Slc16a3/Aldoc/Edn1/Pgk1/Dhrs9/Pkm/Aldoa/Tpi1/Pfkl/Pgam1/Ass1/Mif/Pdk1/Atp2b4/Ldha/Nupr1/Eno1/Bdh2/Gapdh/Mgst3/Txnrd1/P4ha1/Anxa1/Egln1/Dbi/Odc1/Slc38a1/Grhpr/Sirt1/Gclm/Myc/Pdpn/Pfkp/Ndufab1/Fads1/Slc27a1/Pgd/Park7/Hsd17b12/Alox5/Adh5/Fabp5/Acsl1/Stard4/Abcd4/Gcsh/Insig1/Prxl2b/Per2/C3/Bcat2/Atf4/Gpi1/Oaz1/Alox5ap/Hif1a/Ptgr1/Mthfd2l/Galk1/Por/Mpc1/Slc23a2/Mtln/Pdzd11/Nfe2l1/Icmt/Hsd17b4/Atp7a/Gc…
GO:0071825	protein-lipid complex organization	29	-0.725518	-1.58547	0.0146244	0.0146244	0.112442	1334	tags=28%, list=9%, signal=25%	Dgat1/Nr1h2/Abca1/Scarb1/Pltp/Abcg1/Apoe/Apoc1
GO:0032680	regulation of tumor necrosis factor production	177	-0.519172	-1.45156	0.0146491	0.0146491	0.112442	1445	tags=27%, list=10%, signal=24%	Lbp/Tbc1d23/H2-Q10/Cybb/Spon2/Oas1a/Rad21/Syk/Sash3/Cx3cr1/Lgals9/Cd47/Gstp1/Csf1r/Elf4/C5ar2/Stat3/Cd14/Myd88/Zbtb20/Tnfrsf1a/Fcgr3/Ifngr1/Rara/H2-K1/Tlr1/H2-D1/Fcgr2b/Ly96/Zfp36/Akap12/Trim30a/Ptafr/Bcl3/H2-T22/Arid5a/Oas2/Thbs1/Ccr5/H2-Q4/H2-Q6/Ccr2/H2-Q7/Axl/H2-T23/Oas1g/Oas3
GO:0060339	negative regulation of type I interferon-mediated signaling pathway	21	-0.766987	-1.60149	0.0146595	0.0146595	0.112442	595	tags=29%, list=4%, signal=27%	Adar/Samhd1/Nlrc5/Stat2/Oas1g/Oas3
GO:0034390	smooth muscle cell apoptotic process	27	0.673017	1.59824	0.0147663	0.0147663	0.113092	1621	tags=33%, list=11%, signal=30%	Edn1/Gapdh/Sirt1/Sod2/Atf4/Slc7a5/Stub1/Gsk3b/Rbm10
GO:0006120	mitochondrial electron transport, NADH to ubiquinone	23	0.672849	1.56072	0.0148063	0.0148063	0.113205	2458	tags=57%, list=17%, signal=47%	Park7/Ndufb8/Ndufb9/Ndufb6/Ndufa8/Ndufs8/Ndufs7/Ndufv2/Ndufs6/Ndufs1/Iscu/Ndufc2/Dld
GO:0010823	negative regulation of mitochondrion organization	51	0.594978	1.59187	0.0148298	0.0148298	0.113205	1715	tags=29%, list=12%, signal=26%	Bnip3/Higd1a/Lmna/Prelid1/Vat1/Dnm1l/Bcl2l1/Gclc/Bak1/Fxn/Slc25a4/Psmd10/Trp53/Tfrc/Tspo
GO:0048525	negative regulation of viral process	99	-0.574311	-1.47891	0.0148475	0.0148475	0.113205	570	tags=26%, list=4%, signal=25%	Trim25/Znfx1/Trim12a/Trim12c/Rnasel/Bst2/Zfp36/Ifi204/Trim30a/Oas2/Stat1/Trim30d/Ifi203/Sp100/Oasl2/Ly6e/Mndal/Ifitm3/Ifi211/Ifi209/Cd74/Oas1g/Oas3/Ciita/Ifi206/Ifi213
GO:0010564	regulation of cell cycle process	638	0.326506	1.19254	0.0149289	0.0149289	0.113279	2843	tags=28%, list=19%, signal=24%	Dyrk3/Edn1/Ccnf/Tnf/Plk2/Atp2b4/Diaph3/Mki67/Wnt4/Kcnn4/Rgcc/Anxa1/Ercc6/Sirt1/Mdm2/Myc/Pdpn/Nat10/Ahctf1/Ranbp1/Nbn/Calm3/Adam17/Ankrd17/Spdl1/Calr/Nup62/Spc24/Ppp2r5b/Gipc1/Hspa2/Bin1/Chmp2b/Ywhah/Cdk6/Pebp1/Pkp4/Pinx1/Ccnd1/Sfpq/Eif4g1/Bcl2l1/Ncapg2/Rrm1/Smarca4/Cdt1/Calm1/Ccnl1/Actl6a/Rps6ka2/Nfe2l1/Anp32b/E2f1/Birc5/Senp6/Nsun2/Ezh2/Azin1/Nek6/Prpf40a/Pdcd6ip/Pdgfb/Sde2/Prmt2/Ddb1/Plk3/Csnk2…
GO:0048659	smooth muscle cell proliferation	171	-0.511879	-1.42424	0.0149399	0.0149399	0.113279	1621	tags=27%, list=11%, signal=25%	Ern1/Ppard/Enpp1/Tlr4/Igfbp3/Map3k5/Spon2/Cdh13/Pparg/Smpd3/Ednra/Calcrl/C3ar1/Il15/Il6ra/S1pr2/Gna12/Ddr2/Gstp1/Grk2/Tgfbr2/Egfr/Ang/Pdcd4/P2ry6/Mef2c/Myd88/Trib1/Stat5b/Adamts1/Cdkn1a/Cdkn1b/Foxj2/Ddit3/Vegfa/Tcf7l2/Ptafr/Mmp2/Thbs1/Pdgfrb/Hpgd/Apoe/Ndrg2/Apod/Flt1/Cav1/Notch3
GO:0001945	lymph vessel development	30	-0.725635	-1.58225	0.0149608	0.0149608	0.113279	1734	tags=37%, list=12%, signal=32%	Tmem204/Heg1/Ccbe1/Pkd1/Tie1/Nfatc1/Syk/Acvrl1/Vegfa/Kdr/Sox18
GO:0021801	cerebral cortex radial glia-guided migration	23	0.672177	1.55917	0.0149681	0.0149681	0.113279	24	tags=9%, list=0%, signal=9%	Cdk5r1/Lrp8
GO:0022030	telencephalon glial cell migration	23	0.672177	1.55917	0.0149681	0.0149681	0.113279	24	tags=9%, list=0%, signal=9%	Cdk5r1/Lrp8
GO:2000345	regulation of hepatocyte proliferation	20	0.715037	1.59132	0.0151353	0.0151353	0.114375	154	tags=15%, list=1%, signal=15%	Tnf/Plau/Cflar
GO:0046039	GTP metabolic process	24	0.694959	1.60635	0.0152065	0.0152065	0.114743	769	tags=25%, list=5%, signal=24%	Ampd3/Nme1/Ran/Nme2/Impdh1/Gnai3
GO:0072089	stem cell proliferation	105	-0.556947	-1.45251	0.0153415	0.0153415	0.115591	1827	tags=26%, list=12%, signal=23%	Wnt11/Pdcd2/Lrp6/Snai2/Kitl/Hdac5/Zfp36l1/Ltbp3/Arih2/Nfatc1/Rarg/Fermt2/Cebpa/Prg4/Ncoa3/Tgfbr2/Prrx1/Pim1/Eif2ak2/Pbx1/Notch1/Kdr/Irgm1/Ace/Nfib/Cd34/Sox18
GO:0032306	regulation of prostaglandin secretion	14	0.751228	1.5853	0.0154415	0.0154415	0.116173	83	tags=14%, list=1%, signal=14%	Edn1/Mif
GO:0018208	peptidyl-proline modification	37	0.61747	1.54083	0.0154998	0.0154998	0.116423	2397	tags=38%, list=16%, signal=32%	P4ha1/Egln1/Fkbp2/Fkbp4/Ppia/Prdx4/Ppil1/P4hb/Ranbp2/Pin1/Fkbp11/Fkbp1a/Ppil2/P4ha2
GO:0090068	positive regulation of cell cycle process	220	0.389065	1.26731	0.0155202	0.0155202	0.116423	2843	tags=34%, list=19%, signal=28%	Dyrk3/Edn1/Tnf/Wnt4/Kcnn4/Rgcc/Anxa1/Mdm2/Ranbp1/Adam17/Ankrd17/Nup62/Gipc1/Hspa2/Pebp1/Pkp4/Ccnd1/Sfpq/Eif4g1/Ncapg2/Rrm1/Anp32b/Birc5/Ezh2/Azin1/Pdgfb/Cdc73/Rab11a/Spast/Tpr/Mad2l1/Npm1/Dync1li1/Rock2/Ncaph2/App/Apex1/Nsmce2/Hyal1/Kat5/Kif3b/Tmod3/Lsm11/Pcid2/Cdc42/Cul3/Smc2/Klhl18/Cdca8/Smc6/Cdc14a/Rrm2b/Plcg2/Anapc7/Ppp1r35/Rptor/Camk2d/Stil/Nsfl1c/Wnk1/Igf1r/Rad18/Phb2/Smc4/Igf1/Dtl/Mad2l1bp…
GO:0006939	smooth muscle contraction	79	-0.605013	-1.5162	0.0155452	0.0155452	0.116439	294	tags=20%, list=2%, signal=20%	Sulf1/Cttn/Tshz3/Smpd3/Ednra/Calcrl/Sod1/Ptgs1/Ptafr/Tifab/Mylk/Flt1/Cav1/Cd38/Atp1a2/Myh11
GO:0044406	adhesion of symbiont to host	11	-0.838682	-1.60238	0.0156535	0.0156535	0.117078	1037	tags=55%, list=7%, signal=51%	Gbp6/Gbp7/Scarb1/Gbp3/Gbp2/Gbp9
GO:0009221	pyrimidine deoxyribonucleotide biosynthetic process	10	0.791526	1.58531	0.0157676	0.0157676	0.11776	2040	tags=70%, list=14%, signal=60%	Nme1/Nme2/Dtymk/Dut/Tbpl1/Tyms/Cmpk1
GO:0050672	negative regulation of lymphocyte proliferation	88	-0.58917	-1.48573	0.0158284	0.0158284	0.118041	1495	tags=28%, list=10%, signal=26%	Ripor2/H2-Q10/Cd37/Laptm5/Itch/Mad1l1/Cd274/Casp3/Lgals9/Tnfrsf21/Zbtb7b/Cebpb/H2-K1/H2-D1/Fcgr2b/Pla2g2d/Lst1/H2-T22/Cd300a/H2-Q4/H2-Q6/H2-Q7/H2-T23/H2-Aa/Slfn1
GO:0090174	organelle membrane fusion	101	0.481765	1.4407	0.0158582	0.0158582	0.118091	2403	tags=31%, list=16%, signal=26%	Stx11/Diaph3/Eea1/Anxa1/Stx3/Uso1/Erc1/Rab8b/Chmp2b/Arl8b/Kif5b/Stx4a/Gnai3/Syt11/Stx8/Rab34/Tom1/Rab7/Vamp7/Coro1a/Sec22b/Tbc1d4/Chmp6/Cav2/Vti1b/Vav3/Snap47/Chmp2a/Rab12/Stx2/Pip4k2b
GO:0034392	negative regulation of smooth muscle cell apoptotic process	12	0.793964	1.63072	0.0159166	0.0159166	0.118353	1426	tags=42%, list=10%, signal=38%	Edn1/Gapdh/Slc7a5/Stub1/Gsk3b
GO:0006612	protein targeting to membrane	98	0.467849	1.39574	0.0160442	0.0160442	0.119098	2148	tags=28%, list=15%, signal=24%	Cdk5r1/Ccl2/Itgam/Zdhhc18/Hspa5/Ubl4a/Hras/Sgta/Cib1/Srp9/Srp14/Sec61b/Sec63/Oga/Macf1/Vamp7/Arpc2/Srp19/Zdhhc20/Zdhhc14/Srp72/Mff/Micall1/Fyn/Bag6/Zfand2b/Vps37a
GO:1902110	positive regulation of mitochondrial membrane permeability involved in apoptotic process	29	0.637102	1.52625	0.0160634	0.0160634	0.119098	1949	tags=41%, list=13%, signal=36%	Bnip3/Bcl2l1/Bax/Gclc/Bak1/Slc25a4/Siva1/Chchd10/Gsk3b/Vdac2/Rhot1/Mul1
GO:0033605	positive regulation of catecholamine secretion	11	-0.837318	-1.59977	0.0162076	0.0162076	0.119993	1242	tags=27%, list=8%, signal=25%	Pink1/Grk2/Cxcl12
GO:0170036	import into the mitochondrion	47	0.571991	1.50749	0.0162594	0.0162594	0.120202	3576	tags=57%, list=24%, signal=44%	Smdt1/Hif1a/Tomm40/Slc25a37/Mrpl18/Timm17a/Fxn/Tomm70a/Dnlz/Timm17b/Pam16/Timm23/Grpel1/Dnajc19/Vdac1/Tomm20/Maip1/Afg3l2/Sfxn1/Timm50/Akt1/Romo1/Slc25a38/Micu2/Sfxn3/Dnajc15/Micu1
GO:0006188	IMP biosynthetic process	14	0.748546	1.57964	0.0163933	0.0163933	0.120724	768	tags=21%, list=5%, signal=20%	Ampd3/Aprt/Gmpr
GO:0002064	epithelial cell development	175	-0.506734	-1.4192	0.0164052	0.0164052	0.120724	630	tags=14%, list=4%, signal=14%	Rarg/Ednra/Ccm2/S1pr2/Pard3/Cebpa/Arid4a/Myd88/Tnfrsf1a/F11r/Il6st/Map3k1/Rara/Hpse/Notch2/Vegfa/Notch1/Fosl2/Kdr/Col18a1/Cxcr4/Pecam1/Cldn5/Sox18/Cdh5
GO:0070972	protein localization to endoplasmic reticulum	68	0.526665	1.47779	0.0164167	0.0164167	0.120724	2873	tags=40%, list=19%, signal=32%	Ppp1r15a/Hspa5/Ubl4a/Sgta/Insig1/Man1a/Srp9/Srp14/Spcs3/Sec61b/Sec63/Vapa/Macf1/Spcs2/Rab10/Srp19/Srp72/Bag6/Zfand2b/Rab3gap2/Ankrd13c/Sec16a/Btf3/Akt1/Srprb/Get4/Tram1
GO:0008211	glucocorticoid metabolic process	18	0.720823	1.5687	0.0164245	0.0164245	0.120724	1349	tags=28%, list=9%, signal=25%	Wnt4/Rest/Atp1a1/Ywhah/Stub1
GO:0019646	aerobic electron transport chain	53	0.577407	1.5464	0.0164656	0.0164656	0.120852	3462	tags=53%, list=23%, signal=41%	Park7/Cox5a/Ndufb8/Ndufb9/Ndufb6/Ndufa8/Ndufs8/Cox4i1/Uqcrq/Ndufs7/Uqcr11/Ndufv2/Cox7b/Ndufs6/Ndufs1/Iscu/Ndufc2/Afg1l/Sdhc/Dld/Cox6a1/Cox7a2/Cycs/Ndufa10/Cox5b/Ndufv1/Dnajc15/Cyc1
GO:0003203	endocardial cushion morphogenesis	30	-0.721063	-1.57228	0.0165219	0.0165219	0.121092	895	tags=23%, list=6%, signal=22%	Tgfbr2/Mdm4/Eng/Acvrl1/Notch1/Heyl/Aplnr
GO:0014037	Schwann cell differentiation	48	0.5755	1.52202	0.0165934	0.0165934	0.121399	567	tags=15%, list=4%, signal=14%	Plec/Ndrg1/Pou3f1/Hras/Adgrg6/Pmp22/Bag1
GO:0061138	morphogenesis of a branching epithelium	171	-0.50509	-1.40535	0.0166114	0.0166114	0.121399	1392	tags=17%, list=9%, signal=16%	Sulf1/Tie1/Nfatc1/Sema5a/Nrp1/Ednra/Ccl11/Kdm5b/Pxn/Ncoa3/Tgfbr2/Rasip1/Stk4/Hhex/Eng/Ctsh/Pbx1/Lrp5/Vegfa/Notch1/Pml/Kdr/Cxcr4/Pdgfra/Cxcl12/Col4a1/Flt1/Lama5/Agtr2
GO:0002440	production of molecular mediator of immune response	240	-0.490414	-1.40646	0.0166559	0.0166559	0.121409	1448	tags=21%, list=10%, signal=19%	P2rx7/Tnfrsf1b/H2-Q10/Cd37/Laptm5/Slc11a1/Spon2/Kdelr1/Itm2a/Ash1l/Cd40/Syk/Ticam2/Sash3/Kmt5c/Litaf/Irf5/Cgas/Tlr7/Myd88/B2m/Il4ra/Bcl6/Dennd1b/H2-K1/Pou2f2/H2-D1/Fcgr2b/Bst2/Fosl2/Icosl/Samhd1/Fgl2/H2-T22/Arid5a/Cd22/Card11/H2-Q4/H2-Q6/Cd28/Ccr2/H2-Q7/Fcgr4/Batf/Axl/H2-T23/Scimp/Cd74/Ighm/H2-Ab1
GO:0072073	kidney epithelium development	109	-0.565432	-1.48216	0.0166603	0.0166603	0.121409	666	tags=12%, list=5%, signal=11%	Mef2c/Ctns/Pbx1/Rara/Notch2/Vegfa/Notch1/Wwtr1/Hes1/Heyl/Lama5/Aqp1/Agtr2
GO:0051642	centrosome localization	32	0.639775	1.549	0.0167083	0.0167083	0.121415	2634	tags=47%, list=18%, signal=39%	Syne1/Cep83/Ift20/Ezr/Kif5b/Bicd2/Akap9/Fhod1/Pafah1b1/Mad2l1/Nin/Nubp1/Plxna2/Ints13/Dync1li2
GO:0010466	negative regulation of peptidase activity	127	-0.542325	-1.45368	0.0167339	0.0167339	0.121415	567	tags=12%, list=4%, signal=11%	Naip5/Cdkn2d/Nr4a1/Vegfa/Serping1/Ifi204/Thbs1/Ifi203/Mndal/Ifi211/Ifi209/Ifi206/Ifi213/Itih5/Aqp1
GO:0032308	positive regulation of prostaglandin secretion	13	0.757535	1.58329	0.01678	0.01678	0.121415	83	tags=15%, list=1%, signal=15%	Edn1/Mif
GO:0009163	nucleoside biosynthetic process	13	0.756258	1.58062	0.01678	0.01678	0.121415	976	tags=31%, list=7%, signal=29%	Tk1/Aprt/Dtymk/Dnph1
GO:0034404	nucleobase-containing small molecule biosynthetic process	13	0.756258	1.58062	0.01678	0.01678	0.121415	976	tags=31%, list=7%, signal=29%	Tk1/Aprt/Dtymk/Dnph1
GO:0001778	plasma membrane repair	25	0.686488	1.59985	0.016855	0.016855	0.121564	847	tags=28%, list=6%, signal=26%	S100a10/Anxa2/Myh9/Chmp2b/Arl8b/Ahnak/Syt11
GO:1903715	regulation of aerobic respiration	33	0.620784	1.51113	0.0168686	0.0168686	0.121564	1058	tags=33%, list=7%, signal=31%	Bnip3/Tnf/Nupr1/Myc/Vcp/Park7/Hif1a/Gadd45gip1/Uqcc2/Atp7a/Shmt2
GO:0002577	regulation of antigen processing and presentation	19	-0.782013	-1.61201	0.0168824	0.0168824	0.121564	1384	tags=37%, list=9%, signal=33%	Slc11a1/Tapbpl/Tap2/Fgl2/Thbs1/Cd74/H2-Ab1
GO:0042531	positive regulation of tyrosine phosphorylation of STAT protein	43	-0.666451	-1.53574	0.0169391	0.0169391	0.121564	1210	tags=28%, list=8%, signal=26%	Cd40/Il15/Il6ra/Csf1r/Osm/Tnfrsf1a/Il6st/Parp14/Hes1/Parp9/Pecam1/Tslp
GO:0045792	negative regulation of cell size	13	-0.819208	-1.58519	0.0169556	0.0169556	0.121564	9	tags=15%, list=0%, signal=15%	Deptor/C1qtnf9
GO:0038065	collagen-activated signaling pathway	13	-0.8187	-1.58421	0.0169556	0.0169556	0.121564	1568	tags=46%, list=11%, signal=41%	Enpp1/Syk/Tspan9/Ddr2/Col4a1/Col4a2
GO:0001889	liver development	115	0.43926	1.33482	0.0169671	0.0169671	0.121564	1328	tags=17%, list=9%, signal=16%	Hp/Pkm/Tnf/Ldha/Cited2/Plau/Mki67/Cflar/Hmox1/Sod2/Igf2r/Ccnd1/Prkcsh/Smarca4/Icmt/Sec63/Ezh2/Hmbs/Pik3ca/Acadm
GO:0051101	regulation of DNA binding	103	-0.566837	-1.47258	0.0170111	0.0170111	0.121708	341	tags=11%, list=2%, signal=11%	Runx1t1/Ifi204/Hes1/Ifi203/Sp100/Mndal/Ifi211/Ifi209/Nfib/Ifi206/Ifi213
GO:0010631	epithelial cell migration	281	-0.466932	-1.36479	0.0171063	0.0171063	0.121877	1291	tags=16%, list=9%, signal=15%	Glul/Cdh13/Sema5a/Pparg/Cd40/Nrp1/Rin2/Pxn/Dab2ip/Clasp2/Rhoj/Lpxn/Tgfbr2/Amot/Ptp4a3/P2rx4/Mef2c/Adipor1/Rhob/Acvrl1/Scarb1/Ctsh/Dcn/Nfe2l2/Evl/Nr4a1/Pik3cd/Sema4a/Vegfa/Notch1/Jup/Kdr/Col18a1/Smoc2/Thbs1/Cxcr4/Sp100/Tgfbr3/Meox2/Apoe/Cxcl12/Pecam1/Amotl1/Igf2/Aqp1/Cdh5
GO:0090130	tissue migration	281	-0.466932	-1.36479	0.0171063	0.0171063	0.121877	1291	tags=16%, list=9%, signal=15%	Glul/Cdh13/Sema5a/Pparg/Cd40/Nrp1/Rin2/Pxn/Dab2ip/Clasp2/Rhoj/Lpxn/Tgfbr2/Amot/Ptp4a3/P2rx4/Mef2c/Adipor1/Rhob/Acvrl1/Scarb1/Ctsh/Dcn/Nfe2l2/Evl/Nr4a1/Pik3cd/Sema4a/Vegfa/Notch1/Jup/Kdr/Col18a1/Smoc2/Thbs1/Cxcr4/Sp100/Tgfbr3/Meox2/Apoe/Cxcl12/Pecam1/Amotl1/Igf2/Aqp1/Cdh5
GO:0090132	epithelium migration	281	-0.466932	-1.36479	0.0171063	0.0171063	0.121877	1291	tags=16%, list=9%, signal=15%	Glul/Cdh13/Sema5a/Pparg/Cd40/Nrp1/Rin2/Pxn/Dab2ip/Clasp2/Rhoj/Lpxn/Tgfbr2/Amot/Ptp4a3/P2rx4/Mef2c/Adipor1/Rhob/Acvrl1/Scarb1/Ctsh/Dcn/Nfe2l2/Evl/Nr4a1/Pik3cd/Sema4a/Vegfa/Notch1/Jup/Kdr/Col18a1/Smoc2/Thbs1/Cxcr4/Sp100/Tgfbr3/Meox2/Apoe/Cxcl12/Pecam1/Amotl1/Igf2/Aqp1/Cdh5
GO:0019318	hexose metabolic process	197	0.406519	1.31799	0.0171455	0.0171455	0.121964	1654	tags=22%, list=11%, signal=20%	Aldoc/Pgk1/Pkm/Aldoa/Tpi1/Tnf/Pfkl/Pgam1/Pdk1/Ldha/Eno1/Gapdh/Sirt1/Myc/Pgm1/Pfkp/Pik3r1/Pgp/Fuom/Fabp5/Per2/Atf4/Gpi1/Hif1a/Pgm2l1/Nln/Galk1/Nfe2l1/Pdk3/Man2a2/Ddb1/Pik3ca/Hk3/Acadm/Mdh2/Gpt2/Ppp4r3a/Epm2aip1/Trp53/Slc25a13/Hk1/Slc25a11/Ranbp2/Ppp1r3e
GO:0060840	artery development	100	-0.56054	-1.44296	0.0171662	0.0171662	0.121964	895	tags=18%, list=6%, signal=17%	Tgfbr2/Prrx1/Kat6a/Eng/Acvrl1/Ndst1/Sox4/Ddit3/Vegfa/Notch1/Hes1/Cxcr4/Pdgfrb/Hpgd/Apoe/Mylk/Notch3/Aplnr
GO:0001913	T cell mediated cytotoxicity	45	-0.655867	-1.52428	0.0173762	0.0173762	0.123285	1448	tags=31%, list=10%, signal=28%	P2rx7/H2-Q10/H2-T24/Tap2/B2m/Ctsh/H2-K1/H2-D1/H2-M3/H2-T22/H2-Q4/H2-Q6/H2-Q7/H2-T23
GO:1904893	negative regulation of receptor signaling pathway via STAT	23	-0.733283	-1.54287	0.0175279	0.0175279	0.124188	1946	tags=48%, list=13%, signal=42%	Ptpn2/Socs2/Leprot/Pparg/Sh2b3/Adipor1/Parp14/Bcl3/Irf1/Ptprd/Cav1
GO:0010664	negative regulation of striated muscle cell apoptotic process	34	0.630706	1.55059	0.01771	0.01771	0.124908	1881	tags=38%, list=13%, signal=33%	Nupr1/Cflar/Sirt1/Bag3/Pcmt1/Gch1/Slc25a4/Atg5/Hmgcr/Npm1/Bcl2/Jak2/Atg7
GO:0044743	protein transmembrane import into intracellular organelle	34	0.629604	1.54788	0.01771	0.01771	0.124908	1924	tags=44%, list=13%, signal=38%	Chchd4/Hspd1/Tomm40/Timm17a/Tomm70a/Dnlz/Timm17b/Pam16/Timm23/Grpel1/Pex16/Dnajc19/Pex1/Tomm20/Usp9x
GO:0006221	pyrimidine nucleotide biosynthetic process	23	0.666155	1.5452	0.0177254	0.0177254	0.124908	2393	tags=43%, list=16%, signal=36%	Nme1/Nme2/Dtymk/Dut/Uck2/Tbpl1/Tyms/Umps/Cmpk1/Nme6
GO:0070884	regulation of calcineurin-NFAT signaling cascade	37	0.611653	1.52631	0.0177273	0.0177273	0.124908	2606	tags=35%, list=18%, signal=29%	Tnf/Rcan1/Atp2b4/Nfat5/Cib1/Homer3/Gsk3b/Cherp/Dyrk2/Plcg2/Camta1/Mtor/Igf1
GO:0086091	regulation of heart rate by cardiac conduction	23	-0.73204	-1.54025	0.0178039	0.0178039	0.125236	336	tags=22%, list=2%, signal=21%	Cacna2d1/Scn1b/Jup/Ace/Cav1
GO:0032369	negative regulation of lipid transport	28	-0.706419	-1.54395	0.0178228	0.0178228	0.125236	527	tags=39%, list=4%, signal=38%	Irs2/Akt2/Nrg1/Hbp1/Igfbp3/Nr1h2/Apoc2/Thbs1/Apoe/Apoc1/Agtr2
GO:0006972	hyperosmotic response	17	-0.78651	-1.58441	0.0179697	0.0179697	0.125935	7	tags=12%, list=0%, signal=12%	Rcsd1/Aqp1
GO:0007389	pattern specification process	312	-0.460215	-1.35692	0.0179717	0.0179717	0.125935	1253	tags=11%, list=8%, signal=10%	Kmt2a/Mfng/Nrp1/Rarg/Ednra/Gdf3/Pbx2/Asph/Tgfbr2/Tgif1/Bmp1/Hhex/Pgap1/Eng/Ep300/Mef2c/Acvrl1/Chsy1/Pbx1/Ddit3/Bicc1/Notch2/Lrp5/Notch1/Lfng/Zeb1/Hes1/Btg2/Nbl1/Tifab/Meox2/Gas1/Heyl/Lama5/Aplnr
GO:0002377	immunoglobulin production	123	-0.536891	-1.43723	0.018037	0.018037	0.126142	542	tags=16%, list=4%, signal=16%	Il4ra/Bcl6/H2-K1/Pou2f2/H2-D1/Fcgr2b/Icosl/Samhd1/Fgl2/H2-T22/Cd22/Card11/H2-Q4/H2-Q6/Cd28/H2-Q7/Batf/H2-T23/Ighm/H2-Ab1
GO:0071800	podosome assembly	23	0.66562	1.54396	0.0180506	0.0180506	0.126142	1600	tags=39%, list=11%, signal=35%	Tnf/Diaph3/Lcp1/Gsn/Dbnl/Dock5/Tns3/Msn/Arpc2
GO:0051983	regulation of chromosome segregation	116	0.451908	1.37954	0.0181737	0.0181737	0.126829	3544	tags=46%, list=24%, signal=35%	Mki67/Sirt1/Spdl1/Spc24/Ncapg2/Smarca4/Actl6a/Birc5/Nek6/Csnk2a2/Cdk5rap2/Anapc15/Zwint/Tpr/Mad2l1/Dync1li1/Ncaph2/Nsmce2/Kat5/Pcid2/Tacc3/Cul3/Smc2/Cdca8/Smc6/Spc25/Anapc7/BC005624/Smarcb1/Lcmt1/Zw10/Zfp207/Chfr/Rad18/Smc4/Mad2l1bp/Cdca2/Ccnb1/Cdk1/Bub1/Cdc6/Arid2/Cenpe/Hnrnpu/Trip13/Rcc2/Smarce1/Smarcc1/Anapc2/Ube2c/Cdc16/Phf10/Bub1b
GO:0036294	cellular response to decreased oxygen levels	106	0.460788	1.39118	0.0182178	0.0182178	0.126964	1698	tags=26%, list=12%, signal=24%	Pgk1/Bnip3/Pdk1/Fam162a/Adam8/Eno1/Cited2/Cpeb4/Hyou1/Rgcc/Egln1/Higd1a/Sirt1/Myc/Adrb2/Hif1a/Eif4ebp1/Ubqln1/Dnmt3a/Pdk3/Chchd2/Plk3/Stub1/P4hb/Trp53/Rock2/Pik3cb/Bcl2
GO:0050709	negative regulation of protein secretion	66	0.537709	1.49738	0.018256	0.018256	0.127056	1836	tags=29%, list=12%, signal=25%	Ifnb1/Cyp51/Pfkl/Rab11fip1/Anxa1/Rest/Ccn3/Ptpmt1/Rhbdf2/Eny2/Nr1h3/Anxa5/Hmgcr/Rsad2/Ptpn11/Idh2/Ndufaf2/Sfrp1/Map4k4
GO:0022616	DNA strand elongation	35	0.611202	1.49888	0.0182874	0.0182874	0.127059	2047	tags=43%, list=14%, signal=37%	Mcm3/Nbn/Mcm7/Pcna/Mcm4/Lig1/Nucks1/Actl6a/Pole3/Pola1/Pold3/Yy1/Ruvbl2/Ino80c/Lig3
GO:0006959	humoral immune response	122	-0.529694	-1.41624	0.0183397	0.0183397	0.127059	806	tags=24%, list=5%, signal=23%	Tnfrsf21/Ang/Rpl39/Rarres2/Mef2c/B2m/Cfb/H2-K1/Notch2/H2-D1/Fcgr2b/Serping1/C1ra/Notch1/Bcl3/H2-T22/Trf/H2-Q4/H2-Q6/Ccr2/H2-Q7/H2-T23/H2-DMa/Cxcl12/Tslp/Cxcl9/Ighm/C1s1/Rnase6
GO:0061333	renal tubule morphogenesis	61	-0.630418	-1.52826	0.0183459	0.0183459	0.127059	666	tags=13%, list=5%, signal=13%	Mef2c/Ctns/Pbx1/Vegfa/Hes1/Col4a1/Lama5/Agtr2
GO:0050657	nucleic acid transport	126	0.441076	1.35798	0.0183807	0.0183807	0.127059	2815	tags=37%, list=19%, signal=30%	Arc/Nup107/Ran/Ahctf1/Ncbp2/Nup62/Lrpprc/Srsf3/Bicd2/Hnrnpa2b1/Mrpl18/Ybx1/Srsf1/Thoc6/Nsun2/Eny2/Dhx9/Srsf7/Pabpn1/Xpot/Tpr/Ranbp2/Tomm20/Eif4e/Iws1/Hnrnpa3/Pcid2/Xpo1/Cetn3/Flot1/Ncbp1/Nup93/Supt6/Ndc1/Fxr2/Fyttd1/Slbp/Wnk1/Cetn2/Kpnb1/Snupn/Rae1/Nxt1/Hnrnpa1/Rbm15b/Rbm8a
GO:0050658	RNA transport	126	0.441076	1.35798	0.0183807	0.0183807	0.127059	2815	tags=37%, list=19%, signal=30%	Arc/Nup107/Ran/Ahctf1/Ncbp2/Nup62/Lrpprc/Srsf3/Bicd2/Hnrnpa2b1/Mrpl18/Ybx1/Srsf1/Thoc6/Nsun2/Eny2/Dhx9/Srsf7/Pabpn1/Xpot/Tpr/Ranbp2/Tomm20/Eif4e/Iws1/Hnrnpa3/Pcid2/Xpo1/Cetn3/Flot1/Ncbp1/Nup93/Supt6/Ndc1/Fxr2/Fyttd1/Slbp/Wnk1/Cetn2/Kpnb1/Snupn/Rae1/Nxt1/Hnrnpa1/Rbm15b/Rbm8a
GO:0043280	positive regulation of cysteine-type endopeptidase activity involved in apoptotic process	102	0.484655	1.45087	0.0184996	0.0184996	0.127707	1799	tags=27%, list=12%, signal=24%	Bbc3/Tnf/Fam162a/Sirt1/Myc/Vcp/Rest/Hspd1/Pdcd5/Gsn/Dapk1/Nlrp3/Bax/Ctsd/Anp32b/Bak1/Dap/Malt1/Xdh/Rnf7/Rps27l/App/Pycard/Rps3/Slc11a2/St18/Jak2/Acer2
GO:0006084	acetyl-CoA metabolic process	29	0.631522	1.51288	0.0185247	0.0185247	0.127708	1694	tags=38%, list=11%, signal=34%	Pdk1/Mvd/Hmgcs1/Pmvk/Mpc1/Pdk3/Mpc2/Cs/Vdac1/Mvk/Fasn
GO:0000724	double-strand break repair via homologous recombination	151	0.426056	1.34328	0.0187315	0.0187315	0.12896	2611	tags=26%, list=18%, signal=21%	Mcm5/Mcm2/Ercc6/Mcm3/Nbn/Mcm7/Mcm4/Sfr1/Ppp4r2/Sfpq/Mcm6/Nucks1/Kmt5a/Swi5/Actl6a/Ube2n/Gins2/Nabp1/Fus/Fancm/Topbp1/Blm/Yy1/Morf4l2/Nsmce2/Kat5/Epc2/Ruvbl2/Rbbp8/Smc6/Rad54l/Parp1/Zswim7/Spidr/Rpa1/Psmd14/Gins4/Mms22l/Fan1
GO:0038166	angiotensin-activated signaling pathway	17	-0.784979	-1.58132	0.0188055	0.0188055	0.129192	431	tags=18%, list=3%, signal=17%	Agtrap/Ace/Cav1
GO:2000193	positive regulation of fatty acid transport	19	0.710739	1.5611	0.0188238	0.0188238	0.129192	477	tags=16%, list=3%, signal=15%	Edn1/Mif/Acsl1
GO:0006721	terpenoid metabolic process	37	0.607524	1.51601	0.018841	0.018841	0.129192	616	tags=14%, list=4%, signal=13%	Fdps/Dhrs9/Hmgcs1/Adh5/Fdft1
GO:0009219	pyrimidine deoxyribonucleotide metabolic process	20	0.706741	1.57286	0.0191166	0.0191166	0.130564	2040	tags=45%, list=14%, signal=39%	Nme1/Nme2/Dtymk/Dut/Tbpl1/Tyms/Upp2/Nt5c/Cmpk1
GO:0072599	establishment of protein localization to endoplasmic reticulum	40	0.58476	1.48556	0.0191187	0.0191187	0.130564	2113	tags=42%, list=14%, signal=37%	Hspa5/Ubl4a/Sgta/Man1a/Srp9/Srp14/Spcs3/Sec61b/Sec63/Macf1/Spcs2/Rab10/Srp19/Srp72/Bag6/Zfand2b/Rab3gap2
GO:0006405	RNA export from nucleus	73	0.508856	1.44014	0.0191259	0.0191259	0.130564	3314	tags=44%, list=22%, signal=34%	Nup107/Ncbp2/Nup62/Srsf3/Hnrnpa2b1/Thoc6/Nsun2/Eny2/Dhx9/Pabpn1/Xpot/Tpr/Eif4e/Iws1/Pcid2/Xpo1/Ncbp1/Nup93/Supt6/Fyttd1/Wnk1/Rae1/Nxt1/Rbm15b/Rbm8a/Magoh/Thoc3/Thoc1/Nup85/Cpsf6/Sarnp/Khdrbs1
GO:0006704	glucocorticoid biosynthetic process	10	0.785755	1.57375	0.0191434	0.0191434	0.130564	471	tags=30%, list=3%, signal=29%	Wnt4/Rest/Atp1a1
GO:0019953	sexual reproduction	662	0.321273	1.17413	0.0192511	0.0192511	0.131062	2686	tags=23%, list=18%, signal=19%	Dnmt3l/Edn1/Cyp51/Aldoa/Fosl1/Ddias/Mcm5/Mki67/Wnt4/Spire1/Mcm2/Zmynd15/Sirt1/Syne1/Xlr/Snrpa1/Mcm3/Agfg1/Nbn/Mcm7/Mcm4/Ift20/Park7/Itgav/Cct3/Pmp22/Myh9/Calr/Kcnq1ot1/Hvcn1/Cib1/Tmem119/Cct6a/Psmd13/Hspa2/Pebp1/Rad23b/Cct2/Fbxw11/Bcl2l1/Mcm6/Itgb1/Tcp1/Cd9/Cenpx/Rps6ka2/Cenps/Bsg/Ccnb2/Bax/Akap9/Rai14/Birc5/Prdx4/Dnmt3a/Nsun2/Sfmbt1/Ybx3/Slc4a2/Diaph2/Ddb1/Pafah1b1/Csnk2a2/Pik3ca/Clock/Hmgb2/Pde…
GO:2000551	regulation of T-helper 2 cell cytokine production	11	0.792853	1.61068	0.0192677	0.0192677	0.131062	767	tags=27%, list=5%, signal=26%	Ifnb1/Cd81/Nlrp3
GO:0043407	negative regulation of MAP kinase activity	47	-0.650526	-1.51881	0.0193798	0.0193798	0.131649	208	tags=21%, list=1%, signal=21%	Dusp1/Prkcd/Inpp5k/Pparg/Dab2ip/Gstp1/Cd300a/Apoe/Cav1/Spry4
GO:0051668	localization within membrane	604	0.32038	1.1646	0.0194673	0.0194673	0.132068	2495	tags=26%, list=17%, signal=22%	Cdk5r1/S100a10/Ccl2/Tnf/Atp2b4/Itgam/Rala/Zdhhc18/Rapgef2/Hspa5/Ehd1/Lmna/Stx3/Timm13/Cd24a/Anxa2/Ubl4a/Exoc5/Lgals3/Rab32/Cd81/Gripap1/Pik3r1/Ift20/Hras/Hsp90aa1/Pdcd5/Rab8b/Gsn/Sgta/Rap2a/Cib1/Timm10/Ppfia1/Ezr/Emc8/Epg5/Vps29/Hspa4/Slc5a3/Kif5b/Golga4/Vps35/Srp9/Rhbdf2/Tomm40/Stx4a/Tm9sf3/Bcl2l1/Itgb1/Srp14/Stac2/Stx8/Pdzd11/Rab34/Sec61b/Bsg/Acap2/Bax/Sec63/Vps26a/Dnm2/Smurf1/Ldlrap1/Sacm1l/To…
GO:0106380	purine ribonucleotide salvage	13	0.746731	1.56071	0.0196027	0.0196027	0.13281	768	tags=31%, list=5%, signal=29%	Ampd3/Aprt/Impdh1/Gmpr
GO:0001708	cell fate specification	63	-0.630394	-1.53125	0.0196852	0.0196852	0.133017	2313	tags=29%, list=16%, signal=24%	Ar/Gli3/Mga/Tbx3/Nfix/Hoxc10/Psen2/Smo/Six1/Rbbp4/Cdon/Gatad2b/Fzd7/Chd3/Notch1/Nfia/Nfib/Sox18
GO:0034391	regulation of smooth muscle cell apoptotic process	26	0.673291	1.57839	0.0197305	0.0197305	0.133017	1621	tags=35%, list=11%, signal=31%	Edn1/Gapdh/Sirt1/Sod2/Atf4/Slc7a5/Stub1/Gsk3b/Rbm10
GO:1905710	positive regulation of membrane permeability	36	0.604305	1.48618	0.0197348	0.0197348	0.133017	1949	tags=42%, list=13%, signal=36%	Bnip3/Bcl2l1/Bax/Gclc/Bak1/Fxn/Spg7/Slc25a4/Siva1/Chchd10/Gsk3b/Trp53/Vdac2/Rhot1/Mul1
GO:0009725	response to hormone	570	-0.423472	-1.30489	0.0197374	0.0197374	0.133017	915	tags=12%, list=6%, signal=11%	Grk2/Usf1/Per1/Pip4k2a/Zfp36l2/Arid1a/Fibin/Sult1a1/Pck2/Ncoa2/Idh1/Ang/Klf9/Peg13/P2ry6/Rarres2/Ep300/Thra/Trim25/Mef2c/Insr/Adipor1/Zbtb7b/Stat3/Pdk2/Gatm/Stat5b/Nfe2l2/Csk/Daxx/Snx5/Sorl1/Marcks/Crebrf/Agtrap/Rara/Nr4a1/Eif4ebp2/Ramp1/Zfp36/Notch1/Fosl2/Atp1a3/Lpin1/Grb10/Mmp2/Gdf15/Arid5a/Irf1/Lbh/Fbxo32/Stat1/Tgfbr3/Ghr/Stat2/Atp2a1/Ace/Cav1/Cd38/Atp1a2/Heyl/Ramp2/Igf2/C1qtnf9/Aqp1/Agtr2
GO:0015732	prostaglandin transport	19	0.709646	1.5587	0.0201333	0.0201333	0.135446	83	tags=11%, list=1%, signal=10%	Edn1/Mif
GO:0072593	reactive oxygen species metabolic process	199	0.396706	1.2867	0.0201598	0.0201598	0.135446	1715	tags=23%, list=12%, signal=21%	Edn1/Bnip3/Tnf/Cxcl1/Gadd45a/Plau/Cflar/Itgam/Txnrd1/Sirt1/Txn1/Prdx1/Park7/Alox5/Hspd1/Sod2/Hvcn1/Coq7/Cd36/Slc5a3/Ncf4/Hif1a/Eif5a/Gnai3/Prdx2/Prdx6/Ripk3/Atp7a/Prdx4/Eif6/Gch1/Vav1/Pdgfb/Pdk3/Atg5/Hdac4/Xdh/Trp53/Naglu/Cyba/Vdac1/App/Dhfr/Bcl2/Ndufs1/Tspo
GO:0009129	pyrimidine nucleoside monophosphate metabolic process	21	0.67024	1.5286	0.0201774	0.0201774	0.135446	2023	tags=38%, list=14%, signal=33%	Nme1/Nme2/Dut/Uck2/Tyms/Umps/Upp2/Nt5c
GO:0042773	ATP synthesis coupled electron transport	64	0.538991	1.49908	0.0202759	0.0202759	0.135751	3501	tags=55%, list=24%, signal=42%	Park7/Cox5a/Ndufb8/Coq7/Ndufb9/Ndufb6/Ndufa8/Ndufs8/Cox4i1/Uqcrq/Chchd2/Ndufs7/Uqcr11/Ndufv2/Cox7b/Ndufs6/Ndufs1/Iscu/Ndufc2/Afg1l/Sdhc/Dld/Cox6a1/Ndufv3/Cox7a2/Ccnb1/Cdk1/Cycs/Ndufa10/Ndufa12/Cox5b/Ndufv1/Dnajc15/Cyc1/Mtch2
GO:0042775	mitochondrial ATP synthesis coupled electron transport	64	0.538991	1.49908	0.0202759	0.0202759	0.135751	3501	tags=55%, list=24%, signal=42%	Park7/Cox5a/Ndufb8/Coq7/Ndufb9/Ndufb6/Ndufa8/Ndufs8/Cox4i1/Uqcrq/Chchd2/Ndufs7/Uqcr11/Ndufv2/Cox7b/Ndufs6/Ndufs1/Iscu/Ndufc2/Afg1l/Sdhc/Dld/Cox6a1/Ndufv3/Cox7a2/Ccnb1/Cdk1/Cycs/Ndufa10/Ndufa12/Cox5b/Ndufv1/Dnajc15/Cyc1/Mtch2
GO:0001906	cell killing	158	-0.512844	-1.40859	0.0203525	0.0203525	0.136086	1177	tags=22%, list=8%, signal=21%	Syk/Ccl11/H2-T24/Cx3cr1/Cebpg/Gbp7/Lgals9/Tap2/Lyz2/Myd88/B2m/Stat5b/Fcgr3/Ctsh/Gbp3/Igtp/H2-K1/Irgm2/H2-D1/Fcgr2b/Tap1/Fgl2/Gbp2/H2-M3/H2-T22/Ccr5/Fcgr1/H2-Q4/H2-Q6/H2-Q7/Fcgr4/H2-T23/Cxcl12/Cxcl9/Igf2
GO:0033574	response to testosterone	14	0.73739	1.5561	0.0205313	0.0205313	0.137101	1929	tags=50%, list=13%, signal=43%	Cflar/Sirt1/Spp1/Rwdd1/Msn/Rock2/Slc39a9
GO:1902107	positive regulation of leukocyte differentiation	181	-0.510491	-1.43271	0.0206532	0.0206532	0.137485	1206	tags=19%, list=8%, signal=17%	Zbtb1/Syk/Flt3l/Il15/Sash3/Lgals9/Casp8/Tgfbr2/Arid1a/Klf10/Ikzf1/Csf1r/Evi2/Zbtb7b/Nfkbid/Trib1/Nedd9/Stat5b/Sox4/Il4ra/Bcl6/Hlx/Rara/Notch2/Fos/Cd83/Rhoh/Irf1/Ccr2/Axl/H2-DMa/Cd74/H2-Aa/Dlk1
GO:1903708	positive regulation of hemopoiesis	181	-0.510491	-1.43271	0.0206532	0.0206532	0.137485	1206	tags=19%, list=8%, signal=17%	Zbtb1/Syk/Flt3l/Il15/Sash3/Lgals9/Casp8/Tgfbr2/Arid1a/Klf10/Ikzf1/Csf1r/Evi2/Zbtb7b/Nfkbid/Trib1/Nedd9/Stat5b/Sox4/Il4ra/Bcl6/Hlx/Rara/Notch2/Fos/Cd83/Rhoh/Irf1/Ccr2/Axl/H2-DMa/Cd74/H2-Aa/Dlk1
GO:1903587	regulation of blood vessel endothelial cell proliferation involved in sprouting angiogenesis	14	-0.803977	-1.57495	0.0206695	0.0206695	0.137485	375	tags=21%, list=3%, signal=21%	Vegfa/Thbs1/Aplnr
GO:1903078	positive regulation of protein localization to plasma membrane	51	0.578512	1.54782	0.0209606	0.0209606	0.13924	1900	tags=29%, list=13%, signal=26%	Tnf/Atp2b4/Stx3/Lgals3/Cib1/Ezr/Kif5b/Stx4a/Itgb1/Stac2/Zdhhc5/Rab11a/Rangrf/Commd1/Cnst
GO:0002864	regulation of acute inflammatory response to antigenic stimulus	24	-0.748493	-1.60123	0.0210093	0.0210093	0.139312	543	tags=46%, list=4%, signal=44%	Fcgr3/H2-K1/H2-D1/Fcgr2b/Pla2g2d/H2-T22/Fcgr1/H2-Q4/H2-Q6/H2-Q7/H2-T23
GO:0120161	regulation of cold-induced thermogenesis	125	-0.529911	-1.41797	0.0210385	0.0210385	0.139312	1362	tags=22%, list=9%, signal=20%	Zfp516/Ip6k1/Nr1h2/Flcn/Syk/Il15/Nr1d1/Lama4/Thra/Ucp2/Adipor1/Zbtb7b/Gatm/Mfap2/Il4ra/Cmklr1/Cebpb/Ddit3/Vegfa/Notch1/Lpin1/Grb10/Arrdc3/Cxcr4/Plac8/Ccr2/Cav1
GO:0044409	symbiont entry into host	78	-0.588385	-1.46826	0.0210532	0.0210532	0.139312	1184	tags=26%, list=8%, signal=24%	Nrp1/Trim11/Trim34a/Trim8/Nectin4/Grk2/Siglec1/Trim25/Insr/Trim12a/Naip5/Trim12c/Trim30a/Trim30d/Ly6e/Ifitm3/Axl/Cd74/Cav1/Ciita
GO:0097345	mitochondrial outer membrane permeabilization	26	0.668689	1.5676	0.0214461	0.0214461	0.141728	1949	tags=42%, list=13%, signal=37%	Bnip3/Bcl2l1/Gclc/Bak1/Slc25a4/Siva1/Chchd10/Gsk3b/Vdac2/Rhot1/Mul1
GO:0002507	tolerance induction	30	-0.709327	-1.54669	0.0217256	0.0217256	0.143389	1533	tags=43%, list=10%, signal=39%	Xkr8/H2-Q10/Itch/Cd274/C3ar1/Tgfbr2/H2-K1/H2-D1/H2-T22/H2-Q4/H2-Q6/H2-Q7/H2-T23
GO:1900452	regulation of long-term synaptic depression	13	0.74527	1.55766	0.0217982	0.0217982	0.143683	753	tags=15%, list=5%, signal=15%	Arc/Bcl2l1
GO:0034309	primary alcohol biosynthetic process	11	0.787477	1.59976	0.0218583	0.0218583	0.143893	1264	tags=36%, list=9%, signal=33%	Wnt4/Park7/Rest/Dab2
GO:0006958	complement activation, classical pathway	18	-0.765553	-1.55826	0.0219443	0.0219443	0.144049	367	tags=33%, list=2%, signal=33%	C2/C1qc/Serping1/C1ra/Ighm/C1s1
GO:1901659	glycosyl compound biosynthetic process	18	0.709346	1.54372	0.0219533	0.0219533	0.144049	976	tags=22%, list=7%, signal=21%	Tk1/Aprt/Dtymk/Dnph1
GO:0051236	establishment of RNA localization	129	0.435075	1.34868	0.0219666	0.0219666	0.144049	2815	tags=36%, list=19%, signal=29%	Arc/Nup107/Ran/Ahctf1/Ncbp2/Nup62/Lrpprc/Srsf3/Bicd2/Hnrnpa2b1/Mrpl18/Ybx1/Srsf1/Thoc6/Nsun2/Eny2/Dhx9/Srsf7/Pabpn1/Xpot/Tpr/Ranbp2/Tomm20/Eif4e/Iws1/Hnrnpa3/Pcid2/Xpo1/Cetn3/Flot1/Ncbp1/Nup93/Supt6/Ndc1/Fxr2/Fyttd1/Slbp/Wnk1/Cetn2/Kpnb1/Snupn/Rae1/Nxt1/Hnrnpa1/Rbm15b/Rbm8a
GO:0060712	spongiotrophoblast layer development	12	-0.826823	-1.58857	0.0220755	0.0220755	0.144578	199	tags=25%, list=1%, signal=25%	Zfp36l1/Nrk/Igf2
GO:0009566	fertilization	104	0.457474	1.3701	0.0221086	0.0221086	0.14458	1942	tags=22%, list=13%, signal=19%	Aldoa/Park7/Itgav/Cct3/Myh9/Hvcn1/Cct6a/Cct2/Bcl2l1/Tcp1/Cd9/Bax/Ybx3/Cct8/Ttll5/Cct7/Cast/Tarbp2/Vdac2/Adcy3/Tdrkh/Clic4/Cct5
GO:0033238	regulation of amine metabolic process	26	0.66613	1.5616	0.0221324	0.0221324	0.14458	1646	tags=38%, list=11%, signal=34%	Atp2b4/Itgam/Park7/Vps35/Pebp1/Oaz1/Atp7a/Slc7a11/Fh1/Npy
GO:1902686	mitochondrial outer membrane permeabilization involved in programmed cell death	31	0.628149	1.52278	0.0222485	0.0222485	0.144968	1949	tags=42%, list=13%, signal=36%	Bnip3/Bcl2l1/Bax/Gclc/Bak1/Spg7/Slc25a4/Siva1/Chchd10/Gsk3b/Vdac2/Rhot1/Mul1
GO:2000108	positive regulation of leukocyte apoptotic process	31	0.627706	1.52171	0.0222485	0.0222485	0.144968	1625	tags=45%, list=11%, signal=40%	Bbc3/Adam8/Anxa1/Rapgef2/Sirt1/Myc/Cd24a/Prelid1/Il10/Bax/Cd44/Jak3/Trp53/Pik3cb
GO:0048557	embryonic digestive tract morphogenesis	12	-0.826098	-1.58718	0.0223568	0.0223568	0.145242	501	tags=42%, list=3%, signal=40%	Gli3/Nipbl/Hlx/Tcf7l2/Pdgfra
GO:0032310	prostaglandin secretion	17	0.71397	1.54096	0.0223607	0.0223607	0.145242	83	tags=12%, list=1%, signal=12%	Edn1/Mif
GO:0010660	regulation of muscle cell apoptotic process	88	0.486729	1.42557	0.0224002	0.0224002	0.145242	1907	tags=33%, list=13%, signal=29%	Edn1/Bnip3/Nupr1/Gapdh/Cflar/Hmox1/Sirt1/Capn2/Pik3r1/Bag3/Sod2/Atf4/Eif5a/Atp2a2/Pcmt1/Gch1/Slc25a4/Slc7a5/Atg5/Stub1/Hmgcr/Gsk3b/Trp53/Npm1/Rbm10/Bcl2/Jak2/Atg7/Mff
GO:0006403	RNA localization	154	0.420631	1.33079	0.0224043	0.0224043	0.145242	2815	tags=36%, list=19%, signal=29%	Arc/Nup107/Ran/Ahctf1/Ncbp2/Nup62/Lrpprc/Srsf3/Bicd2/Cct2/Hnrnpa2b1/Tcp1/Mrpl18/Ybx1/Caprin1/Srsf1/Thoc6/Nsun2/Eny2/Hnrnpab/Dhx9/Srsf7/Pabpn1/Xpot/Tpr/Yy1/Ranbp2/Tomm20/Eif4e/Iws1/Hnrnpa3/Pcid2/Stau2/Znhit6/Xpo1/Cetn3/Flot1/Ncbp1/Dkc1/Nup93/Supt6/Ndc1/Fxr2/Fyttd1/Slbp/Wnk1/Cetn2/Kpnb1/Snupn/Rae1/Nxt1/Hnrnpa1/Fbl/Rbm15b/Rbm8a
GO:0040017	positive regulation of locomotion	529	-0.418086	-1.2813	0.0225865	0.0225865	0.146237	1274	tags=16%, list=9%, signal=15%	Cdh13/Nox4/Sema4d/Sema5a/Lpar1/Mcam/Cd40/Nrp1/Cd274/Plvap/Ednra/Ccl11/Aoc3/C3ar1/Rin2/Cx3cr1/P2ry12/Itga4/Fermt2/Dab2ip/Clasp2/Ddr2/Rhoj/Camk1d/Lgals9/Cd47/Casp8/Tgfbr2/Amot/Sema6d/Stk4/Gcnt2/Egfr/Sema6b/Csf1r/P2ry6/Rarres2/P2rx4/Insr/Stat3/Rhob/Nedd9/Lamb1/Stat5b/Rac2/Bcl6/Adamts1/Ccl24/Ctsh/Nfe2l2/Il6st/Cmklr1/Ssh2/Pik3cd/Sema4a/Vegfa/Akap12/Notch1/Ptafr/Kdr/Mmp2/Col18a1/Smoc2/Thbs1/Cxcr4/Trf/T…
GO:0061008	hepaticobiliary system development	118	0.434964	1.32813	0.0226613	0.0226613	0.146536	1328	tags=17%, list=9%, signal=16%	Hp/Pkm/Tnf/Ldha/Cited2/Plau/Mki67/Cflar/Hmox1/Sod2/Igf2r/Ccnd1/Prkcsh/Smarca4/Icmt/Sec63/Ezh2/Hmbs/Pik3ca/Acadm
GO:0071711	basement membrane organization	37	-0.688648	-1.56077	0.0227771	0.0227771	0.147099	1692	tags=32%, list=11%, signal=29%	Lamb2/Pxdn/Phldb2/Lamc1/Clasp2/Ctss/Lama2/Lamb1/Nid1/Col4a1/Cav1/Ramp2
GO:0038180	nerve growth factor signaling pathway	11	0.786316	1.5974	0.0228297	0.0228297	0.147252	1315	tags=27%, list=9%, signal=25%	Rapgef2/Rapgef1/Coro1a
GO:0106106	cold-induced thermogenesis	127	-0.531647	-1.42505	0.0229419	0.0229419	0.147622	1362	tags=22%, list=9%, signal=20%	Zfp516/Ip6k1/Nr1h2/Pparg/Flcn/Syk/Il15/Nr1d1/Lama4/Thra/Ucp2/Adipor1/Zbtb7b/Gatm/Mfap2/Il4ra/Cmklr1/Cebpb/Ddit3/Vegfa/Notch1/Lpin1/Grb10/Arrdc3/Cxcr4/Plac8/Ccr2/Cav1
GO:0032892	positive regulation of organic acid transport	39	0.579736	1.46155	0.0229449	0.0229449	0.147622	1133	tags=15%, list=8%, signal=14%	Edn1/Mif/Slc38a1/Acsl1/Itgb1/Slc7a5
GO:0010657	muscle cell apoptotic process	98	0.456432	1.36168	0.0230336	0.0230336	0.148007	1907	tags=31%, list=13%, signal=27%	Edn1/Bnip3/Nupr1/Gapdh/Cflar/Hmox1/Sirt1/Capn2/Pik3r1/Bag3/Sod2/Atf4/Eif5a/Atp2a2/Rps6ka2/Pcmt1/Gch1/Slc25a4/Slc7a5/Atg5/Stub1/Hmgcr/Gsk3b/Trp53/Npm1/Rbm10/Bcl2/Jak2/Atg7/Mff
GO:0099560	synaptic membrane adhesion	22	-0.758473	-1.58416	0.023091	0.023091	0.148049	1842	tags=27%, list=12%, signal=24%	Nrg1/Mapk14/Epha3/Taok2/Ptprd/Sparcl1
GO:0006900	vesicle budding from membrane	72	0.511497	1.44085	0.0230982	0.0230982	0.148049	2954	tags=38%, list=20%, signal=30%	S100a10/Trappc6a/Insig1/Sec23b/Arfgap2/Dnm2/Vapa/Trappc4/Sar1a/Trappc10/Ap2m1/Chmp6/Snx3/Cul3/Tmed10/Trappc3/Vapb/Sec16a/Golph3/Trappc6b/Rab1a/Vps4a/Pdcd6/Tbc1d20/Trappc9/Sec24c/Fnbp1l
GO:0006814	sodium ion transport	134	0.420387	1.30052	0.0233187	0.0233187	0.149275	889	tags=12%, list=6%, signal=11%	Edn1/Slc22a4/Cxcl1/Slc13a3/Atp2b4/Slc6a8/Slc38a1/Adrb2/Slc20a1/Oxsr1/Atp1a1/Ywhah/Slc5a3/Nedd4l/Slc23a2/Ano6
GO:0000725	recombinational repair	155	0.423161	1.33803	0.0235385	0.0235385	0.150494	2611	tags=25%, list=18%, signal=21%	Mcm5/Mcm2/Ercc6/Mcm3/Nbn/Mcm7/Mcm4/Sfr1/Ppp4r2/Sfpq/Mcm6/Nucks1/Kmt5a/Swi5/Actl6a/Ube2n/Gins2/Nabp1/Fus/Fancm/Topbp1/Blm/Yy1/Morf4l2/Nsmce2/Kat5/Epc2/Ruvbl2/Rbbp8/Smc6/Rad54l/Parp1/Zswim7/Spidr/Rpa1/Psmd14/Gins4/Mms22l/Fan1
GO:0035987	endodermal cell differentiation	23	0.657799	1.52582	0.0235795	0.0235795	0.150567	2041	tags=26%, list=14%, signal=23%	Itga5/Itgav/Myh9/Hsbp1/Cdc73/Hmga2
GO:1990845	adaptive thermogenesis	137	-0.51835	-1.40611	0.0238196	0.0238196	0.151911	1362	tags=21%, list=9%, signal=19%	Zfp516/Ip6k1/Nr1h2/Pparg/Flcn/Syk/Il15/Nr1d1/Lama4/Thra/Ucp2/Adipor1/Zbtb7b/Gatm/Mfap2/Il4ra/Cmklr1/Sorl1/Cebpb/Ddit3/Vegfa/Notch1/Lpin1/Grb10/Arrdc3/Cxcr4/Plac8/Ccr2/Cav1
GO:0095500	acetylcholine receptor signaling pathway	27	-0.732057	-1.58502	0.0239738	0.0239738	0.152704	499	tags=26%, list=3%, signal=25%	Sorbs2/Rgs10/Orai1/Ly6e/Ly6a/Ly6c1/Ly6h
GO:0032204	regulation of telomere maintenance	95	0.458004	1.35667	0.0242078	0.0242078	0.154002	2220	tags=26%, list=15%, signal=22%	Lmna/Myc/Nat10/Nbn/Cct3/Cct6a/Ten1/Pinx1/Cct2/Hnrnpa2b1/Smg5/Tcp1/Actl6a/Hnrnpd/Gch1/Cct8/Gnl3/Cct7/Trp53/Yy1/Ruvbl2/Ino80c/Cct5/Dkc1/Parp1
GO:0048660	regulation of smooth muscle cell proliferation	163	-0.51199	-1.41376	0.0242495	0.0242495	0.154019	1274	tags=23%, list=9%, signal=22%	Cdh13/Pparg/Smpd3/Calcrl/C3ar1/Il15/Il6ra/S1pr2/Gna12/Ddr2/Gstp1/Grk2/Tgfbr2/Egfr/Ang/Pdcd4/P2ry6/Mef2c/Myd88/Trib1/Stat5b/Adamts1/Cdkn1a/Cdkn1b/Foxj2/Vegfa/Tcf7l2/Ptafr/Mmp2/Thbs1/Pdgfrb/Hpgd/Apoe/Ndrg2/Apod/Flt1/Cav1/Notch3
GO:0001562	response to protozoan	39	-0.674432	-1.53532	0.0242707	0.0242707	0.154019	1402	tags=46%, list=10%, signal=42%	Cd37/Slc11a1/Tgtp2/Cd40/Gbp7/Myd88/Il4ra/Gbp3/Igtp/Irgm2/Gbp2/Irf8/Bcl3/Gbp9/Batf/Tlr12/Gbp8/Iigp1
GO:0050684	regulation of mRNA processing	118	0.43301	1.32216	0.0244214	0.0244214	0.154573	3363	tags=44%, list=23%, signal=34%	Rest/Srsf3/Hnrnpa2b1/C1qbp/Safb2/Srsf2/Snrnp70/Ncl/Prdx6/Jmjd6/Srsf10/Rbm4/Mbnl2/Srpk2/Dhx9/Srsf7/Rbm39/Pabpn1/Srpk1/Cdc73/Dyrk1a/Puf60/Npm1/Rbm10/Rbmx/Iws1/U2af2/Hspa8/Thrap3/Fip1l1/Ncbp1/Upf3b/Sltm/Rbm47/Supt6/Rbm3/Srsf9/Zfp64/Prmt5/Ahcyl1/Ddx17/Srsf6/Ccnb1/Rbm15b/Rbm8a/Magoh/Hnrnpk/Hnrnpu/Cdk9/Rbm25/Khdrbs1/Rbm7
GO:0021884	forebrain neuron development	21	0.664099	1.5146	0.0244425	0.0244425	0.154573	1915	tags=29%, list=13%, signal=25%	Nrp2/Rapgef2/Atp7a/Uqcrq/Atg7/Plxna1
GO:0070203	regulation of establishment of protein localization to telomere	11	0.782016	1.58867	0.0244489	0.0244489	0.154573	2089	tags=73%, list=14%, signal=62%	Cct3/Cct6a/Cct2/Tcp1/Cct8/Cct7/Cct5/Dkc1
GO:0140056	organelle localization by membrane tethering	68	0.514753	1.44436	0.0247981	0.0247981	0.156587	2805	tags=41%, list=19%, signal=33%	Stx11/Stx3/Exoc5/Cep83/Uso1/Ykt6/Rab8b/Ralb/Cep290/Stx4a/Calm1/Atp2a2/Stx8/Vapa/Exoc6b/Rab3d/Cav2/Esyt1/Pacs2/Exoc3/Vapb/Rab12/Stx2/Stxbp3/Ahcyl1/Camk2a/Vamp8/Pdzd8
GO:0055123	digestive system development	95	-0.554226	-1.42662	0.0248678	0.0248678	0.156663	824	tags=13%, list=6%, signal=12%	Egfr/Rarres2/Insr/Hlx/Il6st/Notch1/Tcf7l2/Pkdcc/Cdkn1c/Hes1/Pdgfra/Igf2
GO:0043403	skeletal muscle tissue regeneration	41	0.574715	1.4551	0.0248714	0.0248714	0.156663	1047	tags=22%, list=7%, signal=20%	Pkm/Plau/Cflar/Anxa1/Cd81/Cd9/Akirin1/Kpna1/Ezh2
GO:0050910	detection of mechanical stimulus involved in sensory perception of sound	12	0.779367	1.60074	0.0249876	0.0249876	0.157069	409	tags=17%, list=3%, signal=16%	Myc/Rest
GO:1902108	regulation of mitochondrial membrane permeability involved in apoptotic process	36	0.594451	1.46195	0.0249973	0.0249973	0.157069	2790	tags=47%, list=19%, signal=38%	Bnip3/Bcl2l1/Bax/Gclc/Bak1/Slc25a4/Siva1/Chchd10/Gsk3b/Trp53/Vdac2/Rhot1/Mul1/Them4/Camk2a/Naif1/Bloc1s2
GO:1903530	regulation of secretion by cell	475	0.332954	1.18149	0.0250604	0.0250604	0.157272	1269	tags=14%, list=9%, signal=13%	Ifnb1/Edn1/Cyp51/S100a10/Ecrg4/Tnf/Pfkl/Mif/Rab11fip1/Mmp13/Itgam/Kcnn4/Rgcc/Anxa1/Rala/Hmox1/Sirt1/Il1rn/Anxa2/Sdc4/Lgals3/Stxbp5/Alox5/Rest/Smcr8/Dynll1/Rab8b/Myh9/Dnm1l/Adam9/Per2/Ccn3/Kif5b/Vps35/Gpr68/Ppia/Ptpmt1/Prkar1a/Hif1a/Rhbdf2/Stx4a/Uqcc2/Bcl2l1/Spp1/Atp2a2/Syt11/Rab34/Bsg/Anxa7/Abr/Birc5/Rab21/Eny2/Pdcd6ip/Nr1h3/Oga/Rab7/Glud1/Arhgef7/Mical1/Rab3d/Anxa5/Clock/Dab2/Vamp7
GO:1904375	regulation of protein localization to cell periphery	130	0.436052	1.3513	0.0252435	0.0252435	0.158069	1900	tags=23%, list=13%, signal=20%	Tnf/Atp2b4/Stx3/Lgals3/Gripap1/Pik3r1/Hras/Cib1/Ppfia1/Ezr/Kif5b/Vps35/Stx4a/Eif4g1/Bcl2l1/Itgb1/Stac2/Stx8/Ldlrap1/Zdhhc5/Dab2/Epb41l2/Gsk3b/Rab11a/Tmed2/Ap2m1/Rangrf/Commd1/Vti1b/Cnst
GO:0006260	DNA replication	250	0.388483	1.30144	0.0252832	0.0252832	0.158069	2930	tags=33%, list=20%, signal=27%	Zranb3/Mcm5/Mcm2/Tk1/Cacybp/Mcm3/Nbn/Mcm7/Pcna/Rfc4/Mcm4/Hras/Ankrd17/Nasp/Gmnn/Baz1a/Lig1/Orc2/Faf1/Mcm6/Nucks1/Rrm1/Cdt1/Actl6a/Cenpx/Cenps/Pole3/Top1/Gins2/Pola1/Pdgfb/Sde2/Dhx9/Pold3/Grwd1/Smc3/Fancm/Topbp1/Trp53/Blm/Npm1/Atf1/Yy1/Tipin/Mcm10/Chaf1a/Gtpbp4/Ruvbl2/Wapl/Rbbp8/Cdc42/Atg7/Prim1/Ino80c/Esco1/Lig3/Smarca5/Rrm2b/Rfc3/Rfc5/Tbrg1/Orc4/Parp1/Pole4/Dtd1/Nfrkb/Supt16/Rpa1/Gins4/Mms22l/Ch…
GO:0043500	muscle adaptation	115	0.421804	1.28177	0.0253014	0.0253014	0.158069	2220	tags=26%, list=15%, signal=22%	Fdps/Edn1/Atp2b4/Cflar/Kcnn4/Sirt1/Lmna/Tnnt1/Gsn/Atp2a2/Tomm70a/Ezh2/Slc25a4/Oga/Hdac4/Tnnc1/Ctdp1/Gsk3b/Glrx3/Yy1/Rock2/Rbm10/Cyba/Pin1/Twf1/Rock1/Ndufs4/Mtpn/Mef2a/Parp1
GO:0001763	morphogenesis of a branching structure	184	-0.49958	-1.40423	0.0253324	0.0253324	0.158069	1392	tags=16%, list=9%, signal=15%	Sulf1/Tie1/Nfatc1/Sema5a/Nrp1/Ednra/Ccl11/Kdm5b/Pxn/Ncoa3/Tgfbr2/Rasip1/Stk4/Rere/Hhex/Eng/Ctsh/Pbx1/Lrp5/Vegfa/Notch1/Pml/Kdr/Cxcr4/Pdgfra/Cxcl12/Col4a1/Flt1/Lama5/Agtr2
GO:0044790	suppression of viral release by host	21	-0.750808	-1.56771	0.0253455	0.0253455	0.158069	1081	tags=38%, list=7%, signal=35%	Trim11/Trim8/Trim25/Trim12a/Trim12c/Trim30a/Pml/Trim30d
GO:0042554	superoxide anion generation	36	0.59418	1.46129	0.0253732	0.0253732	0.158069	769	tags=19%, list=5%, signal=18%	Edn1/Cxcl1/Itgam/Sod2/Hvcn1/Ncf4/Gnai3
GO:0007218	neuropeptide signaling pathway	19	0.695912	1.52854	0.0256984	0.0256984	0.159901	196	tags=16%, list=1%, signal=16%	Ecrg4/Gpr84/Rapgef2
GO:0033135	regulation of peptidyl-serine phosphorylation	102	0.472898	1.41568	0.0257414	0.0257414	0.159973	1021	tags=17%, list=7%, signal=16%	Ifnb1/Tnf/Mif/Atp2b4/Ppp1r15a/Gadd45a/Ercc6/Smad7/Fnip2/Txn1/Park7/Ripk2/Eif4g1/Bax/Cd44/Akap9/Bak1
GO:0003018	vascular process in circulatory system	176	-0.497061	-1.39298	0.0258862	0.0258862	0.160677	1187	tags=19%, list=8%, signal=17%	Smpd3/Plvap/Ednra/Sod1/Itga4/Fermt2/Dusp5/Grk2/Amot/Tbxas1/Egfr/Ptp4a3/Ptgs1/Mgll/Slc16a2/P2rx4/Abcg3/Klf2/Vegfa/Akap12/Kdr/Mmp2/Itga1/Tgfbr3/Apoe/Ace/Cav1/Cd38/Atp1a2/Ramp2/Cldn5/Agtr2/Cdh5
GO:0021799	cerebral cortex radially oriented cell migration	33	0.595401	1.44935	0.0260109	0.0260109	0.161256	24	tags=6%, list=0%, signal=6%	Cdk5r1/Lrp8
GO:0046426	negative regulation of receptor signaling pathway via JAK-STAT	22	-0.752294	-1.57126	0.0261329	0.0261329	0.161815	833	tags=32%, list=6%, signal=30%	Sh2b3/Adipor1/Parp14/Bcl3/Irf1/Ptprd/Cav1
GO:0042573	retinoic acid metabolic process	13	0.736268	1.53885	0.0261891	0.0261891	0.161967	34	tags=8%, list=0%, signal=8%	Dhrs9
GO:1901532	regulation of hematopoietic progenitor cell differentiation	37	-0.683672	-1.54949	0.026267	0.026267	0.162253	1206	tags=30%, list=8%, signal=27%	Zbtb1/Flcn/Eif2ak2/Nfe2l2/Rara/Vegfa/Zfp36/Notch1/Kdr/Hes1/Flt1
GO:0044331	cell-cell adhesion mediated by cadherin	27	-0.728122	-1.5765	0.0263319	0.0263319	0.162457	375	tags=30%, list=3%, signal=29%	Ctnnd1/Tjp1/Cdh11/Cdh13/Vegfa/Notch1/Adam19/Cdh5
GO:0010875	positive regulation of cholesterol efflux	22	-0.751279	-1.56914	0.0264094	0.0264094	0.162589	300	tags=36%, list=2%, signal=36%	Nr1h2/Pparg/Abca1/Pltp/Abcg1/Apoe/Cav1/Abca8a
GO:0022618	protein-RNA complex assembly	164	0.41649	1.31475	0.026417	0.026417	0.162589	2893	tags=37%, list=20%, signal=30%	Rrs1/Lsm4/Mrpl20/Hsp90aa1/Dhx29/Bop1/Eif3a/Mrto4/Gcfc2/Srsf1/Snrpd1/Srsf10/Eif6/Prpf39/Srpk2/Dhx9/Ptges3/Rrp7a/Nufip1/Denr/Strap/Brix1/Rps5/Tarbp2/Srpk1/Cdc73/Rplp0/Puf60/Lsm2/Smn1/Ddx46/Rps27l/Mrps7/Snrpb/Rbmx/Ruvbl2/Aar2/Snrpd3/U2af2/Rpl11/Znhit6/Scaf11/Ncbp1/Prpf31/Rpf2/Rpsa/Usp39/Eif5/Gemin7/Mdn1/Prmt7/Ptbp2/Rps6/Prmt5/Usp4/Srsf6/Rps19/Ppan/Snrpd2/Nop2/Ddx42
GO:0032414	positive regulation of ion transmembrane transporter activity	61	0.536568	1.46955	0.0264846	0.0264846	0.16281	965	tags=16%, list=7%, signal=15%	Arc/Edn1/Calm3/Adrb2/Hspa2/Nedd4l/Calm1/Stac2/Atp7a/Akap9
GO:0031629	synaptic vesicle fusion to presynaptic active zone membrane	15	0.741663	1.58919	0.0268975	0.0268975	0.16495	415	tags=20%, list=3%, signal=19%	Stx11/Stx3/Erc1
GO:0099500	vesicle fusion to plasma membrane	15	0.741663	1.58919	0.0268975	0.0268975	0.16495	415	tags=20%, list=3%, signal=19%	Stx11/Stx3/Erc1
GO:0045596	negative regulation of cell differentiation	562	-0.413451	-1.2742	0.0271032	0.0271032	0.166013	1271	tags=16%, list=9%, signal=15%	Nfatc1/Sema4d/Sema5a/Pparg/Flcn/Rflnb/Nrp1/Rarg/Fzd7/Ccl11/Tmem176a/Nr1d1/C1qc/P2ry12/Trim11/Gdf3/Fermt2/Dab2ip/Lmo2/Hmg20a/Cebpa/Hopx/Ulk1/Ncoa3/Bicral/Ifrd1/Tob2/Sema6d/Zfp36l2/Egfr/Ccnd2/Sema6b/Ctdsp1/Pdcd4/Csf1r/Fbxo7/Dip2b/Runx1t1/Adipor1/Zbtb7b/Stat3/Foxo3/Nfkbid/B2m/Acvrl1/Trib1/Stat5b/Sox4/Tmem176b/Il4ra/Bcl6/Trp53inp1/Nfe2l2/Hlx/Daxx/Sorl1/Foxj2/Pbx1/Bambi/Ddit3/Rara/Dleu2/Sema4a/Vegfa/Z…
GO:0010638	positive regulation of organelle organization	464	0.335358	1.1851	0.027488	0.027488	0.168168	2089	tags=23%, list=14%, signal=20%	Edn1/Bnip3/Bbc3/S100a10/Tnf/Baiap2/Fam162a/Wnt4/Spire1/Rgcc/Anxa1/Rala/Fchsd2/Sdc4/Nbn/Adrb2/Ift20/Lcp1/Erc1/Smcr8/Slain2/Fmn1/Cct3/Dynll1/Pdcd5/Gsn/G3bp1/Pfn1/Dnm1l/Nup62/Cct6a/Rhoc/Bin1/Vasp/Kif5b/Vps35/Pebp1/Ralb/Cct2/Sfpq/Hif1a/Hnrnpa2b1/Cdc42ep4/Wdr1/Mtss1/Tcp1/Actl6a/Caprin1/Bax/Hnrnpd/Cyfip1/Akap9/Mapre1/Bak1/Tom1/Pphln1/Fhod1/Flna/Gch1/Cfl1/Pdcd6ip/Pdgfb/Slc25a4/Nes/Siva1/Pdlim4/Cct8/Swap…
GO:1903076	regulation of protein localization to plasma membrane	99	0.455456	1.36058	0.0277781	0.0277781	0.169739	1900	tags=25%, list=13%, signal=22%	Tnf/Atp2b4/Stx3/Lgals3/Gripap1/Pik3r1/Cib1/Ppfia1/Ezr/Kif5b/Stx4a/Bcl2l1/Itgb1/Stac2/Stx8/Ldlrap1/Zdhhc5/Dab2/Rab11a/Tmed2/Ap2m1/Rangrf/Commd1/Vti1b/Cnst
GO:0035264	multicellular organism growth	180	-0.500498	-1.40685	0.027842	0.027842	0.169926	1187	tags=16%, list=8%, signal=15%	Smpd3/Rarg/Sod1/Ccm2/Atxn2/Ncoa3/Ikzf1/Hhex/Ep300/Tbl1xr1/Stat3/Apba1/Stat5b/Klf2/Daxx/Rara/Notch2/H19/Tcf7l2/Pkdcc/Fosl2/Atp1a3/Cdkn1c/Wwtr1/Gdf15/Plac8/Ghr/Igf2/Dlk1
GO:0032351	negative regulation of hormone metabolic process	11	0.777826	1.58016	0.0280109	0.0280109	0.170753	558	tags=36%, list=4%, signal=35%	Wnt4/Rest/Atp1a1/Nfkb1
GO:0097720	calcineurin-mediated signaling	43	0.567091	1.45547	0.028075	0.028075	0.17094	2606	tags=30%, list=18%, signal=25%	Tnf/Rcan1/Atp2b4/Nfat5/Cib1/Homer3/Gsk3b/Cherp/Dyrk2/Plcg2/Camta1/Mtor/Igf1
GO:0030150	protein import into mitochondrial matrix	18	0.694073	1.51048	0.0281327	0.0281327	0.171088	1656	tags=56%, list=11%, signal=49%	Tomm40/Timm17a/Tomm70a/Dnlz/Timm17b/Pam16/Timm23/Grpel1/Dnajc19/Tomm20
GO:0014742	positive regulation of muscle hypertrophy	37	0.585017	1.45984	0.028168	0.028168	0.171099	2606	tags=41%, list=18%, signal=33%	Fdps/Edn1/Sirt1/Gsn/Slc25a4/Rock2/Pin1/Twf1/Rock1/Mtpn/Mef2a/Parp1/Camk2d/Mtor/Igf1
GO:0099175	regulation of postsynapse organization	116	0.440902	1.34594	0.0282155	0.0282155	0.171184	1196	tags=15%, list=8%, signal=14%	Cdk5r1/Arc/Lrp8/Baiap2/Pdlim5/Nrp2/Dnm1l/Chmp2b/Asap1/Vps35/Caprin2/Caprin1/Dbnl/Cfl1/Rheb/Mark2/Pafah1b1
GO:0000278	mitotic cell cycle	768	0.308163	1.14163	0.0283803	0.0283803	0.171776	2662	tags=26%, list=18%, signal=23%	Edn1/Ccnf/Tnf/Plk2/Rrs1/Mki67/Rgcc/Anxa1/Tuba1a/Mcm2/Tk1/Sirt1/Uhrf1/Mdm2/Myc/Gem/Pdpn/Naa50/Mcm3/Cacul1/Vcp/Exoc5/Stmn1/Ran/Ranbp1/Kif2a/Nbn/Pcna/Tubb4b/Calm3/Adam17/Ube2a/Mcm4/Ankrd17/Nasp/Spdl1/Nup62/Cib1/Brox/Spc24/Ttl/Rhoc/Hspa2/Lig1/Chmp2b/Ywhah/Cdk6/Fam110a/Cks1b/Pebp1/Pinx1/Ccnd1/Fbxw11/Eif4ebp1/Eif4g1/Mcm6/Cdk14/Itgb1/Ncapg2/Rrm1/Smarca4/Cdt1/Eps8/Calm1/Actl6a/Ywhae/Ccnb2/Nfe2l1/Anp32b/E…
GO:0010613	positive regulation of cardiac muscle hypertrophy	36	0.585165	1.43911	0.0283803	0.0283803	0.171776	2606	tags=42%, list=18%, signal=34%	Fdps/Edn1/Sirt1/Gsn/Slc25a4/Rock2/Pin1/Twf1/Rock1/Mtpn/Mef2a/Parp1/Camk2d/Mtor/Igf1
GO:0071677	positive regulation of mononuclear cell migration	67	0.512124	1.4272	0.028723	0.028723	0.173644	889	tags=18%, list=6%, signal=17%	Cxcl10/Ccl2/Spn/Abl2/Adam8/Serpine1/Lgals3/Adam17/Oxsr1/Calr/C1qbp/Ano6
GO:0045787	positive regulation of cell cycle	290	0.363197	1.2426	0.0289089	0.0289089	0.174281	2142	tags=24%, list=15%, signal=21%	Dyrk3/Edn1/Tnf/Fosl1/Nupr1/Cited2/Wnt4/Kcnn4/Rgcc/Anxa1/Mdm2/Myc/Ranbp1/Adam17/Ankrd17/Calr/Nup62/Ttl/Gipc1/Hspa2/Pebp1/Pkp4/Ccnd1/Sfpq/Eif4ebp1/Eif4g1/Ncapg2/Rrm1/Il10/Anp32b/Birc5/Ezh2/Azin1/Pdgfb/Srpk2/Pafah1b1/Psmd10/Cdc73/Rab11a/Spast/Trp53/Tpr/Mad2l1/Npm1/Dync1li1/Ptpn11/Rock2/Ncaph2/App/Apex1/Rps6kb1/Nsmce2/Hyal1/Kat5/Eif4e/Fnta/Kif3b/Tmod3/Lsm11/Pcid2/Cdc42/Cul3/Smc2/Klhl18/Cdca8/Smc6/Cdc…
GO:0050803	regulation of synapse structure or activity	234	0.378003	1.24996	0.02893	0.02893	0.174281	1196	tags=13%, list=8%, signal=12%	Cdk5r1/Arc/Lrp8/Tnf/Baiap2/Pdlim5/Egln1/Tuba1a/Nrp2/Vcp/Gripap1/Pik3r1/Dnm1l/Rap2a/Plxnc1/Chmp2b/Asap1/Vps35/Caprin2/Eif4g1/Itgb1/Camk1/Il10/Caprin1/Cyfip1/Dbnl/Cfl1/Rheb/Mark2/Slc7a11/Pafah1b1
GO:0035358	regulation of peroxisome proliferator activated receptor signaling pathway	11	0.776529	1.57752	0.0289824	0.0289824	0.174281	472	tags=27%, list=3%, signal=26%	Cited2/Sirt1/Fabp5
GO:0003333	amino acid transmembrane transport	66	0.514588	1.43299	0.028989	0.028989	0.174281	1173	tags=18%, list=8%, signal=17%	Slc22a4/Tnf/Slc13a3/Slc38a1/Per2/Slc7a1/Slc7a8/Itgb1/Slc7a5/Slc7a11/Lrrc8d/Lrrc8b
GO:0050807	regulation of synapse organization	230	0.379477	1.24879	0.028999	0.028999	0.174281	1196	tags=13%, list=8%, signal=13%	Cdk5r1/Arc/Lrp8/Tnf/Baiap2/Pdlim5/Egln1/Tuba1a/Nrp2/Vcp/Gripap1/Pik3r1/Dnm1l/Rap2a/Plxnc1/Chmp2b/Asap1/Vps35/Caprin2/Eif4g1/Itgb1/Camk1/Il10/Caprin1/Cyfip1/Dbnl/Cfl1/Rheb/Mark2/Slc7a11/Pafah1b1
GO:0002762	negative regulation of myeloid leukocyte differentiation	53	0.5456	1.46121	0.0291774	0.0291774	0.175147	640	tags=21%, list=4%, signal=20%	Ifnb1/Tjp2/Pira2/Myc/Inpp4b/Nme1/Gpr137b/Pik3r1/Nme2/Cdk6/Gpr68
GO:0072332	intrinsic apoptotic signaling pathway by p53 class mediator	87	-0.572824	-1.4459	0.0292276	0.0292276	0.175243	836	tags=20%, list=6%, signal=19%	Mdm4/Casp6/Ep300/Pdk2/Cdkn1a/Zfp385a/Ifi204/Pml/Bcl3/Ifi203/Tifab/Mndal/Ifi211/Ifi209/Cd74/Ifi206/Ifi213
GO:0045598	regulation of fat cell differentiation	124	-0.525308	-1.40792	0.02958	0.02958	0.177148	1808	tags=27%, list=12%, signal=24%	Six1/Mapk14/Lrp6/Snai2/Ppard/Enpp1/Tgfb1i1/Rreb1/Zfp36l1/Pparg/Flcn/Nr1d1/Gdf3/Fermt2/Cebpa/Zfp36l2/Stk4/Pim1/Crebl2/Rarres2/Runx1t1/Zbtb7b/Cmklr1/Cebpb/Zfp385a/Ddit3/Vegfa/Zfp36/Tcf7l2/Lpin1/Wwtr1/Jdp2/Hes1/Dlk1
GO:0051310	metaphase chromosome alignment	90	0.464047	1.36525	0.0297108	0.0297108	0.177678	2824	tags=31%, list=19%, signal=25%	Rrs1/Sirt1/Gem/Spdl1/Nup62/Spc24/Ttl/Chmp2b/Pinx1/Cdt1/Mapre1/Birc5/Zwint/Rab11a/Chmp6/Kat5/Cdc42/Cul3/Cdca8/Spc25/Chmp2a/Nudc/Zw10/Zfp207/Vps4a/Kpnb1/Ccnb1/Dync1h1
GO:0007186	G protein-coupled receptor signaling pathway	437	-0.426325	-1.29044	0.0297619	0.0297619	0.177678	1292	tags=18%, list=9%, signal=17%	Plce1/Grk6/Dnm1/Gprc5a/Inpp5k/Gabbr1/Gprasp1/Gpr132/Vps54/Gpr176/Prkaca/Ppp1r9b/Ece1/Pde2a/Ccrl2/Adgrl4/Lpar1/Pde4a/Tpra1/Lpar4/Syk/Ednra/Fzd7/Calcrl/Ccl11/C3ar1/Cx3cr1/P2ry12/P2ry14/S1pr2/Gna12/Rgs1/Palm/Rgs10/Grk2/Abca1/Adcy7/Sh2b3/Mgll/P2ry6/C5ar2/Insr/Kctd12b/Pde4b/Rac2/Ccl24/Gpr160/Orai1/Cmklr1/Sorl1/Cish/Agtrap/Gpr34/Lpar6/Gpr157/P2ry13/Ramp1/Akap12/Ccl6/Adgre5/Ptafr/Arrdc3/Gpr65/Cxcr4/Ccr5…
GO:0033173	calcineurin-NFAT signaling cascade	42	0.569613	1.4527	0.0298076	0.0298076	0.177678	2606	tags=31%, list=18%, signal=26%	Tnf/Rcan1/Atp2b4/Nfat5/Cib1/Homer3/Gsk3b/Cherp/Dyrk2/Plcg2/Camta1/Mtor/Igf1
GO:0016925	protein sumoylation	41	0.569361	1.44155	0.0298076	0.0298076	0.177678	1967	tags=29%, list=13%, signal=25%	Ifih1/Tollip/Sae1/Zfp451/Park7/Egr2/Hdac4/Gnl3/Rangap1/Nsmce2/Mul1/Zmiz2
GO:0010667	negative regulation of cardiac muscle cell apoptotic process	31	0.610939	1.48106	0.0299565	0.0299565	0.178357	1881	tags=35%, list=13%, signal=31%	Nupr1/Cflar/Sirt1/Pcmt1/Gch1/Slc25a4/Atg5/Npm1/Bcl2/Jak2/Atg7
GO:2000147	positive regulation of cell motility	518	-0.418079	-1.27952	0.0302768	0.0302768	0.180054	1274	tags=16%, list=9%, signal=15%	Cdh13/Nox4/Sema4d/Sema5a/Lpar1/Mcam/Cd40/Nrp1/Cd274/Plvap/Ednra/Ccl11/Aoc3/C3ar1/Rin2/Cx3cr1/P2ry12/Itga4/Fermt2/Dab2ip/Clasp2/Ddr2/Rhoj/Camk1d/Lgals9/Cd47/Casp8/Tgfbr2/Amot/Sema6d/Stk4/Gcnt2/Egfr/Sema6b/Csf1r/P2ry6/Rarres2/P2rx4/Insr/Stat3/Rhob/Nedd9/Lamb1/Stat5b/Rac2/Bcl6/Adamts1/Ccl24/Ctsh/Nfe2l2/Il6st/Cmklr1/Ssh2/Pik3cd/Sema4a/Vegfa/Akap12/Notch1/Ptafr/Kdr/Mmp2/Col18a1/Smoc2/Thbs1/Cxcr4/Trf/T…
GO:0071456	cellular response to hypoxia	99	0.451269	1.34807	0.0304027	0.0304027	0.180593	1698	tags=27%, list=12%, signal=24%	Pgk1/Bnip3/Pdk1/Fam162a/Adam8/Eno1/Cited2/Hyou1/Rgcc/Egln1/Higd1a/Sirt1/Myc/Adrb2/Hif1a/Eif4ebp1/Ubqln1/Dnmt3a/Pdk3/Chchd2/Plk3/Stub1/P4hb/Trp53/Rock2/Pik3cb/Bcl2
GO:0016188	synaptic vesicle maturation	24	0.662791	1.532	0.0305631	0.0305631	0.181335	1731	tags=46%, list=12%, signal=41%	Atp6v1h/Atp6v1a/Atp6v0a1/Atp6v1c1/Atp6v1f/Atp6v1e1/Atp6v1g1/Atp6ap2/Atp6v1d/Zdhhc20/Atp6v1b2
GO:1901989	positive regulation of cell cycle phase transition	102	0.466436	1.39633	0.0310216	0.0310216	0.18341	2798	tags=36%, list=19%, signal=30%	Dyrk3/Rgcc/Anxa1/Mdm2/Adam17/Ankrd17/Hspa2/Ccnd1/Eif4g1/Rrm1/Anp32b/Birc5/Ezh2/Cdc73/Rab11a/Npm1/App/Apex1/Nsmce2/Hyal1/Tmod3/Lsm11/Cul3/Klhl18/Rrm2b/Plcg2/Anapc7/Rptor/Camk2d/Stil/Phb2/Dtl/Mad2l1bp/Ube2e2/Akt1/Ccnb1/Cdk1
GO:0048841	regulation of axon extension involved in axon guidance	25	-0.726198	-1.5677	0.031024	0.031024	0.18341	1620	tags=52%, list=11%, signal=46%	Sema7a/Sema3c/Wnt5a/Sema6a/Sema4b/Sema4d/Sema5a/Nrp1/Sema6d/Sema6b/Sema4a/Vegfa/Cxcl12
GO:0010801	negative regulation of peptidyl-threonine phosphorylation	17	0.68993	1.48908	0.0310475	0.0310475	0.18341	730	tags=29%, list=5%, signal=28%	Ppp1r15a/Smad7/Spred2/Spred1/Eif4g1
GO:0045165	cell fate commitment	187	-0.494918	-1.39104	0.0310565	0.0310565	0.18341	2387	tags=28%, list=16%, signal=24%	Zfp521/Tgfb1/Ar/Lats2/Gli3/Nr2f2/Mga/Tnfsf18/Smad1/Tbx3/Nfix/Hoxc10/Irf4/AW551984/Psen2/Ebf2/Tm2d3/Nrg1/Smo/Wnt11/Six1/Loxl3/Kdm6b/Rbbp4/Tgfb1i1/Cdon/Gatad2b/Pparg/Ednra/Fzd7/Gdf3/Il6ra/Casp3/Tfap4/Prrx1/Mef2c/Stat3/Chd3/Ly9/Rara/Notch2/Notch1/Tcf7l2/Pml/Kdr/Hes1/Nfia/Batf/Nfib/Gas1/Notch3/Sox18
GO:0007169	transmembrane receptor protein tyrosine kinase signaling pathway	506	-0.414196	-1.2665	0.0311778	0.0311778	0.183779	1238	tags=13%, list=8%, signal=12%	Lcp2/Epha3/Dok1/Smpd3/Nrp1/Syk/Tspan9/C2cd5/Pxn/Casp3/Dab2ip/Clasp2/Ddr2/Tcf4/Ulk1/Pip4k2a/Hck/Sh2b3/Egfr/Hhex/Ptp4a3/Arf4/Csf1r/Rarres2/Gigyf1/Insr/Adipor1/Zbtb7b/Stat3/Pdk2/Nedd9/Ndst1/Plat/Stat5b/Dcn/Snx5/Sorl1/Marcks/Pik3cd/Vegfa/Eif4ebp2/Notch1/Mertk/Tcf7l2/Atp1a3/Grb10/Kdr/Gdf15/Smoc2/Itga1/Thbs1/Angptl1/Ghr/Pdgfrb/Adamts12/Pdgfra/Axl/Adgre4/Apod/Col4a1/Col4a2/Flt1/Igf2/Spry4/Agtr2
GO:0000470	maturation of LSU-rRNA	29	0.612682	1.46775	0.031227	0.031227	0.183779	3065	tags=62%, list=21%, signal=49%	Nhp2/Bop1/Wdr12/Eif6/Ftsj3/Npm1/Mak16/Gtpbp4/Rpl10a/Znhit6/Rpf2/Rsl1d1/Rrp15/Nifk/Nop2/Las1l/Rpl7/Rpf1
GO:0061050	regulation of cell growth involved in cardiac muscle cell development	29	0.611623	1.46521	0.031227	0.031227	0.183779	1736	tags=31%, list=12%, signal=27%	Fdps/Edn1/Sirt1/Tomm70a/Slc25a4/Ctdp1/Yy1/Rbm10/Pin1
GO:0000413	protein peptidyl-prolyl isomerization	23	0.641275	1.48749	0.031385	0.031385	0.184497	2677	tags=43%, list=18%, signal=36%	Fkbp2/Fkbp4/Ppia/Ppil1/Ranbp2/Pin1/Fkbp11/Fkbp1a/Ppil2/Ppid
GO:0032305	positive regulation of icosanoid secretion	15	0.733231	1.57112	0.0316721	0.0316721	0.185971	83	tags=13%, list=1%, signal=13%	Edn1/Mif
GO:0022412	cellular process involved in reproduction in multicellular organism	322	0.354076	1.21229	0.0320382	0.0320382	0.187904	1863	tags=15%, list=13%, signal=14%	Dnmt3l/Edn1/Cyp51/Fosl1/Ddias/Wnt4/Spire1/Zmynd15/Xlr/Agfg1/Myh9/Kcnq1ot1/Cib1/Tmem119/Hspa2/Pebp1/Fbxw11/Bcl2l1/Itgb1/Cd9/Rps6ka2/Ccnb2/Bax/Prdx4/Dnmt3a/Nsun2/Diaph2/Ddb1/Pafah1b1/Pik3ca/Hmgb2/Ttll5/Mast2/Selenof/Dcaf13/Tarbp2/Gsk3b/Ncaph2/Mastl/Tbpl1/Bcl2/Rps6kb1/Tdrkh/Kat5/Sfrp1/Vdac3/Ppp2r1a/Etv5/Stau2
GO:0060322	head development	543	-0.406906	-1.24985	0.0321101	0.0321101	0.188087	1218	tags=21%, list=8%, signal=20%	Tgfb1/Akirin2/Mdga1/Plcb1/Atf2/Gli3/Nr2f2/Ndel1/Epor/Nipbl/Mboat7/Sec24b/Smad1/Osr2/Arhgap35/Tbx3/Ncor2/Abl1/Nfix/Csnk1d/Psen2/Ubb/Syne2/Meis2/Msx1/Ski/Irs2/Crispld2/Mdk/Nrg1/Smo/Ldb1/Nr2c2/Six1/Tgfb3/Samd4b/Dvl3/Lrp6/Cep120/Wls/Immp2l/Kdm6b/Dclk1/Bbs4/Rbbp4/Rbfox2/Smarca1/Pex5/Cdon/Tbc1d23/Wdr11/Bmi1/Sema5a/Akna/Ncoa6/Nrp1/Rarg/Ednra/Cx3cr1/P2ry12/Cic/Itga4/Atxn2/Dab2ip/Pbx2/Apaf1/Serpine2/Asph/…
GO:0010498	proteasomal protein catabolic process	463	0.331389	1.173	0.032143	0.032143	0.188087	2003	tags=21%, list=14%, signal=19%	Ccnf/Ecrg4/Plk2/Nupr1/Psmd1/Sirt1/Hspa5/Mdm2/Hsp90b1/Vcp/Psmb5/N4bp1/Sdf2l1/Ube2a/Peli1/Park7/Psmd7/Psmd8/Sel1l/Psmb3/Pmp22/Sgta/Psmc5/Calr/Psmb6/Gipc1/Man1a/Hsp90ab1/Canx/Ube2g2/Fbxo22/Oaz1/Psmb7/Rad23b/Fbxw11/Nedd4l/Faf1/Ubxn4/Znrf1/Psmd2/Psmd6/Ubqln1/Sec61b/Trim26/Nfe2l1/Gclc/Agap3/Ube2n/Psmc3/Smurf1/Psma3/Psmc4/Selenos/Ube2k/Ascc3/Ddb1/Plk3/Psma2/Clock/Dab2/Psmd10/Ccdc47/Dnajb9/Fbxl15/Spsb4/S…
GO:0034605	cellular response to heat	44	0.571018	1.47576	0.0323526	0.0323526	0.188938	1617	tags=36%, list=11%, signal=32%	Hmox1/Vcp/Bag3/Hsp90aa1/Pmp22/Hsp90ab1/Eif2s1/Hsbp1/Ywhae/Hikeshi/Dhx9/Pdcl3/Stub1/Tpr/Tfec/Xylt1
GO:0016071	mRNA metabolic process	650	0.309408	1.13142	0.0323625	0.0323625	0.188938	2841	tags=29%, list=19%, signal=25%	S100a10/Vim/Gspt1/Carhsp1/Snrpa1/Anxa2/Lsm4/Lgals3/Txnl4a/Snrnp25/Rest/Cbll1/Ncbp2/Cdk12/Syncrip/Ppp4r2/Ddx1/Srsf3/Atf4/Dnajb11/Sfpq/Hnrnpa2b1/C1qbp/Safb2/Mrto4/Zcrb1/Noct/Fam50a/Smg5/Srsf2/Gcfc2/Snrnp70/Ncl/Ybx1/Caprin1/Prdx6/Hnrnpd/E2f1/Srsf1/Jmjd6/Snrpd1/Thoc6/Hnrnpul2/Nsun2/Cwc15/Srsf10/Rbm4/Flna/Ddx41/Prpf40a/Nr1h3/Srek1/Sde2/Prpf39/Pabpc4/Mbnl2/Hnrnpab/Rngtt/Srpk2/Dhx9/Sympk/Mettl16/Dhx15/S…
GO:2000773	negative regulation of cellular senescence	22	0.654946	1.5164	0.032615	0.032615	0.190195	1096	tags=27%, list=7%, signal=25%	Plk2/Mif/Sirt1/Cdk6/Ybx1/Gch1
GO:0009161	ribonucleoside monophosphate metabolic process	45	0.553763	1.43369	0.0331409	0.0331409	0.193042	2716	tags=33%, list=18%, signal=27%	Ampd3/Aprt/Impdh1/Gmpr/Nudt2/Uck2/Xdh/Ak2/Umps/Upp2/Nt5c/Gda/Guk1/Adsl/Gmps
GO:0018210	peptidyl-threonine modification	97	0.459652	1.36533	0.033563	0.033563	0.195203	1853	tags=24%, list=13%, signal=21%	Cdk5r1/Dyrk3/Ppp1r15a/Galnt6/Smad7/Spred2/Cdc42bpg/Oxsr1/Galnt2/Cab39/Ripk2/Spred1/Eif4g1/Ube2k/Csnk2a2/Gsk3b/Dyrk1a/Hipk3/Rock2/App/Bcl2/Cdc42bpb/Dyrk2
GO:0071816	tail-anchored membrane protein insertion into ER membrane	15	0.731426	1.56725	0.0335883	0.0335883	0.195203	3395	tags=73%, list=23%, signal=57%	Ubl4a/Sgta/Emc8/Emc6/Emc2/Bag6/Mmgt1/Emc7/Get4/Emc3/Emc10
GO:0170035	L-amino acid catabolic process	31	0.598204	1.45019	0.0338105	0.0338105	0.196098	1415	tags=23%, list=10%, signal=20%	Atp2b4/Gcsh/Got2/Glud1/Scly/Qdpr/Oat
GO:0006887	exocytosis	271	0.355852	1.21067	0.0338191	0.0338191	0.196098	1315	tags=15%, list=9%, signal=14%	S100a10/Stx11/Rab11fip1/Itgam/Anxa1/Rala/Hmox1/Stx3/Anxa2/Exoc5/Sdc4/Stxbp5/Rest/Erc1/Smcr8/Ykt6/Rab8b/Myh9/Dnm1l/Anxa3/Arl8b/Ralb/Stx4a/Bcl2l1/Atp2a2/Syt11/Abr/Lat2/Rab21/Sacm1l/Exoc6b/Pdcd6ip/Steap3/Rab7/Mical1/Rab3d/Scrib/Vamp7/Rab10/Coro1a
GO:0001818	negative regulation of cytokine production	256	-0.468018	-1.35368	0.0338983	0.0338983	0.196334	1301	tags=20%, list=9%, signal=18%	Oas1a/Rad21/Laptm4b/Pparg/Cd274/Ticam2/Cx3cr1/Mefv/Nmi/Casp3/Lgals9/Prg4/Gstp1/Adcy7/Bank1/Tnfrsf21/Abcd1/Pdcd4/Elf4/Siglec1/C5ar2/Tnfrsf1a/Bcl6/Klf2/Csk/Cmklr1/Dhx58/Ddit3/Igtp/Rara/Irgm2/Fcgr2b/Bst2/Zfp36/Mertk/Trim30a/Pml/Cd83/Bcl3/Thbs1/Irgm1/Axl/Ndrg2/Xaf1/Abcd2/Oas1g/Apod/Flt1/Oas3/Cd34
GO:0002697	regulation of immune effector process	340	-0.441327	-1.31444	0.034188	0.034188	0.197788	1448	tags=19%, list=10%, signal=17%	P2rx7/Lbp/Tnfrsf1b/H2-Q10/Cd37/Laptm5/Clec2d/Spon2/Cd40/Zbtb1/Syk/Ticam2/Sash3/H2-T24/Kmt5c/Cx3cr1/Litaf/Lgals9/Irf5/Tap2/Cgas/Tlr7/Zbtb7b/Myd88/Nfkbid/B2m/Stat5b/Dusp22/Rac2/Fcgr3/Il4ra/Bcl6/Hlx/Dennd1b/Dhx58/Rara/H2-K1/H2-D1/Fcgr2b/Serping1/Bst2/Tap1/Fgl2/Ptafr/H2-M3/H2-T22/Arid5a/Irf1/Cd22/Cd300a/Fcgr1/H2-Q4/H2-Q6/Ddx60/Cd28/Ccr2/H2-Q7/Axl/H2-T23/Scimp/Cd74/H2-DMb1/Ighm/Igf2
GO:0034329	cell junction assembly	344	-0.444778	-1.32411	0.0343137	0.0343137	0.198291	1311	tags=16%, list=9%, signal=15%	Nrg1/Ldb1/Wnt11/Myoc/Six1/Clstn1/Hdac7/Snai2/Myo6/Mpdz/Tjp1/Cdh11/Fscn1/Whamm/Prkaca/Phldb2/Agrn/Cttn/Ptpro/Cdh13/Sema4d/Setd5/Epha3/Flcn/Nrp1/Lamc1/Fermt2/Pxn/Pard3/Clasp2/Hopx/Vmp1/Eef2k/Tns1/Taok2/Gpm6b/Mef2c/Acvrl1/Dusp22/F11r/Sema4a/Vegfa/Jup/Adgre5/Kdr/Ptprd/Ace/Pecam1/Apod/Cav1/Ramp2/Esam/Cldn5/Aplnr/Cdh5
GO:0045047	protein targeting to ER	37	0.574016	1.43239	0.0345104	0.0345104	0.199169	2090	tags=41%, list=14%, signal=35%	Hspa5/Ubl4a/Sgta/Man1a/Srp9/Srp14/Spcs3/Sec61b/Sec63/Macf1/Spcs2/Srp19/Srp72/Bag6/Zfand2b
GO:0048499	synaptic vesicle membrane organization	19	0.683098	1.50039	0.0345437	0.0345437	0.199169	415	tags=16%, list=3%, signal=15%	Stx11/Stx3/Erc1
GO:0045048	protein insertion into ER membrane	25	0.656822	1.53071	0.0349083	0.0349083	0.201044	3497	tags=72%, list=24%, signal=55%	Ubl4a/Sgta/Emc8/Emc6/Ccdc47/Emc2/Ncln/Bag6/Rab5if/Wnk1/Mmgt1/Emc7/Get4/Tram1/Emc3/Sec61a1/Emc10/Wdr83os
GO:0061061	muscle structure development	618	-0.405414	-1.25299	0.0349887	0.0349887	0.20128	866	tags=10%, list=6%, signal=10%	Pld3/Arid1a/Col14a1/Vrk3/Ccnd2/Lama2/Pdcd4/Csf1r/Eng/Ep300/Mef2c/Parp2/Lamb1/Sox4/Il4ra/Cd53/Btg1/Gpcpd1/Hlx/Mbnl1/Daxx/Snhg15/Acta1/Sik1/Ddit3/Rara/Nr4a1/Notch2/Vegfa/Fos/Notch1/Tcf7l2/Mylpf/Svil/Gdf15/Zeb1/Hes1/Id3/Btg2/Tgfbr3/Ly6e/Tifab/Pdgfrb/Meox2/Nid1/Pdgfra/Mylk/Actc1/Cxcl12/Plagl1/Cxcl9/Cav1/Ehd2/Heyl/Ramp2/Lama5/Igf2/Myh11/Aplnr/Agtr2
GO:0007292	female gamete generation	117	0.424303	1.29587	0.0353179	0.0353179	0.202946	3268	tags=31%, list=22%, signal=24%	Edn1/Cyp51/Fosl1/Wnt4/Spire1/Sirt1/Rps6ka2/Ccnb2/Diaph2/Ddb1/Pde4d/Dcaf13/Ncaph2/Mastl/Bcl2/Tdrkh/Ppp2r1a/Nanos1/Orc4/Tdrd7/Etv6/Rps6/Igf1/Akt1/Paqr7/Ccnb1/Ptk2b/Kmt2b/Magoh/Top2a/Cenpe/Ctnnb1/Tut7/Afp/Trip13/Src
GO:0010976	positive regulation of neuron projection development	199	0.38056	1.23433	0.0354186	0.0354186	0.20317	1196	tags=14%, list=8%, signal=13%	Lrp8/Baiap2/Abl2/Cflar/Rapgef2/Sirt1/Hspa5/Ehd1/Nme1/Cd24a/Ranbp1/Adam17/Nme2/Dnm1l/Ppp2r5b/Itga6/Rapgef1/Caprin2/Itgb1/Camk1/Caprin1/Cyfip1/Dbnl/Ezh2/Flna/Mark2/Pafah1b1
GO:0045444	fat cell differentiation	223	-0.481313	-1.37155	0.0355263	0.0355263	0.20317	1753	tags=23%, list=12%, signal=21%	Mapk14/Mb/Lrp6/Snai2/Bbs4/Ppard/Enpp1/Tgfb1i1/Rreb1/Fam120b/Selenbp1/Zfp36l1/Nudt7/Zfp516/Pparg/Flcn/Nr1d1/Gdf3/Fermt2/Lama4/Cebpa/Zfp36l2/Stk4/Retreg1/Pim1/Sdf4/Crebl2/Psmb8/Rarres2/Ep300/Tbl1xr1/Runx1t1/Zbtb7b/Cmklr1/Cebpb/Zfp385a/Rnasel/Ddit3/Nr4a1/Vegfa/Cebpd/Zfp36/Tcf7l2/Fosl2/Lpin1/Wwtr1/Jdp2/Hes1/Plac8/Pdgfra/Steap4/Dlk1
GO:0032967	positive regulation of collagen biosynthetic process	31	0.596276	1.44552	0.0355623	0.0355623	0.20317	282	tags=19%, list=2%, signal=19%	Ccl2/Vim/Serpine1/Wnt4/Rgcc/Suco
GO:0030324	lung development	183	-0.487694	-1.37146	0.0355677	0.0355677	0.20317	2529	tags=28%, list=17%, signal=24%	Tbx2/Wnt5a/Acvr2b/Sp1/Tgfb1/Mgp/Igfbp5/Gli3/Ppp3r1/Rdh10/Col6a1/Sec24b/Ncor2/Errfi1/Psen2/Rbbp9/Lipa/Loxl3/Tgfb3/Meg3/Heg1/Rab3a/Ccbe1/Sp3/Ltbp3/Tshz3/Tnrc6c/Smpd3/Cic/Cebpa/Hopx/Tgfbr2/Hs6st1/Hhex/Wwp1/Ep300/Thra/Asah1/Numa1/Ctsh/Klf2/Vegfa/Notch1/Pkdcc/Fosl2/Kdr/Hes1/Pdgfrb/Pdgfra/Ace/Nfib/Lama5
GO:0051955	regulation of amino acid transport	34	0.596246	1.46587	0.0355949	0.0355949	0.20317	1133	tags=18%, list=8%, signal=16%	Tnf/Slc38a1/Il1rn/Per2/Itgb1/Slc7a5
GO:0016226	iron-sulfur cluster assembly	24	0.655586	1.51534	0.0356354	0.0356354	0.20317	2241	tags=46%, list=15%, signal=39%	Glrx5/Ndufab1/Hspa9/Fdx2/Fxn/Ciao2b/Xdh/Glrx3/Ciao2a/Iscu/Nubp1
GO:0031163	metallo-sulfur cluster assembly	24	0.655586	1.51534	0.0356354	0.0356354	0.20317	2241	tags=46%, list=15%, signal=39%	Glrx5/Ndufab1/Hspa9/Fdx2/Fxn/Ciao2b/Xdh/Glrx3/Ciao2a/Iscu/Nubp1
GO:0003002	regionalization	287	-0.459941	-1.34845	0.0357143	0.0357143	0.203289	1184	tags=11%, list=8%, signal=10%	Nrp1/Rarg/Ednra/Gdf3/Pbx2/Tgfbr2/Tgif1/Bmp1/Hhex/Pgap1/Eng/Ep300/Mef2c/Acvrl1/Chsy1/Pbx1/Ddit3/Bicc1/Notch2/Lrp5/Notch1/Lfng/Hes1/Btg2/Nbl1/Tifab/Meox2/Gas1/Heyl/Lama5/Aplnr
GO:0046827	positive regulation of protein export from nucleus	20	0.68668	1.52821	0.0357493	0.0357493	0.203289	1514	tags=40%, list=10%, signal=36%	Mdm2/Bag3/Camk1/Ywhae/Anp32b/Sfn/Gsk3b/Tpr
GO:0051028	mRNA transport	101	0.446994	1.33672	0.0357757	0.0357757	0.203289	3032	tags=40%, list=21%, signal=32%	Arc/Nup107/Ahctf1/Ncbp2/Nup62/Lrpprc/Srsf3/Bicd2/Hnrnpa2b1/Srsf1/Thoc6/Nsun2/Eny2/Dhx9/Srsf7/Pabpn1/Tpr/Ranbp2/Eif4e/Iws1/Hnrnpa3/Pcid2/Xpo1/Cetn3/Ncbp1/Nup93/Supt6/Ndc1/Fxr2/Fyttd1/Slbp/Wnk1/Cetn2/Nxt1/Hnrnpa1/Rbm15b/Rbm8a/Magoh/Thoc3/Thoc1
GO:0070202	regulation of establishment of protein localization to chromosome	12	0.764204	1.5696	0.0361473	0.0361473	0.205173	2404	tags=75%, list=16%, signal=63%	Cct3/Cct6a/Cct2/Tcp1/Cct8/Cct7/Cct5/Dkc1/Spidr
GO:0038061	non-canonical NF-kappaB signal transduction	108	0.44036	1.32566	0.0362753	0.0362753	0.205671	1702	tags=23%, list=12%, signal=21%	Edn1/Tnf/Nlrc3/Vcp/Prdx1/Nfkb2/Calr/Havcr2/Nfkb1/Ccn3/Fbxw11/Zfp91/Nlrp3/Trim26/Ripk3/Nfkbia/Akip1/Malt1/Relb/Sash1/Trim44/Tlr2/App/Pycard/Rps3
GO:0008610	lipid biosynthetic process	506	0.329746	1.1758	0.0363972	0.0363972	0.205782	670	tags=9%, list=5%, signal=9%	Dhcr24/Sqle/Fdps/Edn1/Idi1/Ch25h/Dhrs9/Cyp51/Tnf/Mif/Msmo1/Mvd/Sgms2/Wnt4/Anxa1/Dbi/Sirt1/Srebf2/Hmgcs1/Ldlr/Ndufab1/Capn2/Pdgfa/Fads1/Slc27a1/Agpat5/Plaat3/Pik3r1/Hsd17b12/Alox5/Pmvk/Rest/Acbd3/Nus1/Atp1a1/Fabp5/Acsl1/Stard4/Insig1/Prxl2b/Nfkb1/Cyb5r3/C3/Htr2b/Fdft1/Fdx1/Ptpmt1
GO:0016358	dendrite development	264	0.3619	1.22539	0.0364348	0.0364348	0.205782	1105	tags=11%, list=7%, signal=10%	Cdk5r1/Arc/Lrp8/Plk2/Baiap2/Abl2/Pdlim5/Spire1/Rapgef2/Dnm1l/Rap2a/Ywhah/Asap1/Dock10/Cux1/Llph/Eif4g2/Nedd4l/Caprin2/Itgb1/Camk1/Caprin1/Atp7a/Cyfip1/Dbnl/Cyth2/Rab21/Ezh2/Cfl1
GO:0043542	endothelial cell migration	203	-0.484565	-1.36714	0.0364372	0.0364372	0.205782	1291	tags=20%, list=9%, signal=18%	Glul/Cdh13/Sema5a/Pparg/Cd40/Nrp1/Rin2/Pxn/Dab2ip/Rhoj/Lpxn/Amot/Ptp4a3/P2rx4/Mef2c/Rhob/Acvrl1/Scarb1/Dcn/Nfe2l2/Nr4a1/Pik3cd/Sema4a/Vegfa/Notch1/Jup/Kdr/Col18a1/Smoc2/Thbs1/Cxcr4/Sp100/Tgfbr3/Meox2/Apoe/Cxcl12/Pecam1/Amotl1/Igf2/Cdh5
GO:0030178	negative regulation of Wnt signaling pathway	133	-0.520918	-1.40959	0.0364964	0.0364964	0.205782	2380	tags=26%, list=16%, signal=22%	Ift80/Tmem88/Sfrp4/Lats2/Gli3/Tle4/Jade1/Hic1/Tmem64/Mad2l2/Tle3/Vgll4/Mdk/Wnt11/Mapk14/Tmem131l/Lrp6/Snai2/Ctnnd1/Ptpro/Csnk1e/Dab2ip/Frmd8/Stk4/Foxo3/Ddit3/Bicc1/Tmem170b/Notch1/Tcf7l2/Grb10/Wwtr1/Rnf213/Apoe/Cav1
GO:0001667	ameboidal-type cell migration	387	-0.431743	-1.29417	0.0364964	0.0364964	0.205782	1291	tags=16%, list=9%, signal=15%	Glul/Cdh13/Sema4d/Sema5a/Pparg/Cd40/Nrp1/Ednra/Rin2/Fut8/Itga4/Pxn/Dab2ip/Gna12/Clasp2/Ddr2/Rhoj/Lpxn/Tgfbr2/Amot/Sema6d/Tns1/Sema6b/Ptp4a3/P2rx4/Mef2c/Adipor1/Rhob/Acvrl1/Scarb1/Ctsh/Dcn/Nfe2l2/Evl/Nr4a1/Pik3cd/Lrp5/Sema4a/Vegfa/Akap12/Notch1/Jup/Pml/Kdr/Col18a1/Smoc2/Thbs1/Cxcr4/Cygb/Sp100/Tgfbr3/Meox2/Apoe/Cxcl12/Pecam1/Amotl1/Lama5/Igf2/Aqp1/Cdh5
GO:0071496	cellular response to external stimulus	248	-0.468203	-1.3515	0.0365535	0.0365535	0.205877	1543	tags=19%, list=10%, signal=17%	Got1/Snw1/Folr2/Ripor2/P2rx7/Kptn/Kat2b/Pde2a/Map3k5/Piezo2/Ifi214/Glul/Flcn/Ednra/Itga4/Tnrc6a/Ulk1/Gsdmd/Usf1/Klf10/Pim1/Eif2ak2/Rnf167/Ep300/Pdk2/Gpr155/Sesn1/Plin2/F11r/Cdkn1a/Nfe2l2/Nuak2/Fos/Ifi204/Tcf7l2/Impact/Bmf/Ifi203/Mndal/Ifi211/Axl/Ifi209/Cav1/Atp1a2/Ifi206/Ifi213/Aqp1
GO:0051346	negative regulation of hydrolase activity	191	-0.485829	-1.36873	0.0367347	0.0367347	0.206283	422	tags=8%, list=3%, signal=8%	Naip5/Cdkn2d/Nr4a1/Vegfa/Serping1/Ifi204/Thbs1/Ifi203/Mndal/Ifi211/Ifi209/Apoc1/Ifi206/Ifi213/Itih5/Aqp1
GO:0051336	regulation of hydrolase activity	661	-0.396076	-1.23014	0.0367483	0.0367483	0.206283	1424	tags=16%, list=10%, signal=15%	Arl6ip1/Rabgap1l/Gmip/Laptm5/Gramd4/Agrn/Tnfsf10/Pi16/Wfdc18/Map3k5/Ifi214/Oas1a/Rab11fip2/Sema4d/Lpar1/Nr1h2/Arhgap25/Epha3/Pparg/Cd40/Syk/Ccl11/Sod1/Psenen/Rhog/Mefv/Sgsm2/Fermt2/Adap2/Dab2ip/Snx13/Gna12/Rasa3/Tfap4/Apaf1/Serpine2/Arhgap27/Asph/Rgs1/Casp8/Rgs10/Pot1b/Amot/Ctss/Tbc1d2b/Rasip1/Scarb2/Vrk3/Ang/Psmb8/Cst3/Tbc1d5/Atp13a2/Mef2c/Ccpg1/Stat3/Chp2/Nedd9/Rasgrp3/Naip5/Bcl6/Ccl24/Apoc2/Ct…
GO:0150079	negative regulation of neuroinflammatory response	12	0.762532	1.56616	0.0367871	0.0367871	0.206283	847	tags=25%, list=6%, signal=24%	Ifnb1/Ldlr/Syt11
GO:0061051	positive regulation of cell growth involved in cardiac muscle cell development	15	0.728021	1.55996	0.0367871	0.0367871	0.206283	198	tags=20%, list=1%, signal=20%	Fdps/Edn1/Sirt1
GO:0045638	negative regulation of myeloid cell differentiation	83	0.465711	1.35021	0.0368809	0.0368809	0.206582	972	tags=18%, list=7%, signal=17%	Ifnb1/Tjp2/Pira2/Myc/Inpp4b/Nme1/Gpr137b/Pik3r1/Hspa9/Nme2/Cib1/Cdk6/Gpr68/Lilrb4a/Nfkbia
GO:0048589	developmental growth	635	-0.401373	-1.244	0.0369541	0.0369541	0.206766	1187	tags=13%, list=8%, signal=13%	Smpd3/Nrp1/Rarg/Ednra/Fzd7/Ccl11/Kdm5b/Pum2/Sorbs2/Sash3/Sod1/Ccm2/Itga4/Il6ra/Atxn2/Clasp2/Ddr2/Hopx/Ulk1/Ncoa3/Ifrd1/Tgfbr2/Sema6d/Stk4/Col14a1/Pim1/Ikzf1/Ccnd2/Hhex/Sema6b/Mgll/Csf1r/Ep300/Tbl1xr1/Dip2b/Jade2/Mef2c/Insr/Stat3/Foxo3/Apba1/Parp2/Stat5b/Cdkn1a/Klf2/Cdkn1b/Hlx/Daxx/Snhg15/Rara/Notch2/H19/Sema4a/Vegfa/Notch1/Tcf7l2/Pkdcc/Fosl2/Atp1a3/Cdkn1c/Wwtr1/Impact/Kdr/Gdf15/Thbs1/Cxcr4/Ccr5/D…
GO:0071396	cellular response to lipid	420	-0.426123	-1.28399	0.0371257	0.0371257	0.207414	1181	tags=19%, list=8%, signal=18%	Lbp/Tnfrsf1b/Zfp36l1/Pde2a/Abhd2/Trim41/Spon2/Hadhb/Lpar1/Epha3/Cd274/Syk/Ticam2/Trerf1/Nr1d1/Cx3cr1/Dab2ip/Tfap4/Litaf/Ncoa3/Gstp1/Per1/Abca1/Zfp36l2/Arid1a/Egfr/Plscr4/Pck2/Pim1/Ncoa2/Klf9/Peg13/Pdcd4/P2ry6/Nrip1/Ep300/Mef2c/Cd14/Myd88/Pde4b/B2m/Gpr155/Trib1/Trim12a/Irak2/Gbp3/Gramd1b/Daxx/Tut4/Cebpb/Crebrf/Trim12c/Igtp/Rara/Irgm2/Ly96/Zfp36/Trim30a/Cd300lb/Gbp2/Irf8/Sbno2/Mmp2/Arid5a/Id3/Lbh/F…
GO:0071453	cellular response to oxygen levels	120	0.426617	1.30489	0.0371792	0.0371792	0.207414	1222	tags=21%, list=8%, signal=19%	Pgk1/Bnip3/Pdk1/Fam162a/Adam8/Eno1/Cited2/Cpeb4/Hyou1/Rgcc/Egln1/Higd1a/Sirt1/Myc/Adrb2/Atp6v1a/Hif1a/Eif4ebp1/Ubqln1/Dnmt3a/Ccdc115/Pdk3/Chchd2/Plk3/Atp6v1g1
GO:1990542	mitochondrial transmembrane transport	82	0.474571	1.37105	0.0371917	0.0371917	0.207414	3450	tags=49%, list=23%, signal=38%	Chchd4/Smdt1/Hspd1/Hif1a/Tomm40/Slc25a37/Mpc1/Mrpl18/Timm17a/Abcb8/Fxn/Tomm70a/Dnlz/Timm17b/Pam16/Slc25a4/Timm23/Grpel1/Mpc2/Dnajc19/Slc25a13/Vdac1/Tomm20/Maip1/Afg3l2/Sfxn1/Timm50/Letm1/Ghitm/Akt1/Slc25a15/Romo1/Slc25a26/Slc25a38/Slc25a1/Slc1a3/Micu2/Sfxn3/Mrs2/Dnajc15
GO:0046434	organophosphate catabolic process	191	0.382621	1.23182	0.0372619	0.0372619	0.207578	1379	tags=16%, list=9%, signal=14%	Aldoc/Pgk1/Pkm/Aldoa/Tpi1/Ampd3/Pfkl/Pgam1/Nupr1/Eno1/Gapdh/Myc/Vcp/Ldlr/Pfkp/Dera/Dut/Gpi1/Hif1a/Itpa/Galk1/Prdx6/Dnph1/Eif6/Nudt3/Acot7/Hdac4/Hk3/Htr2a/Xdh
GO:0051985	negative regulation of chromosome segregation	48	0.538252	1.42351	0.0378728	0.0378728	0.210752	2973	tags=44%, list=20%, signal=35%	Sirt1/Spdl1/Spc24/Birc5/Cdk5rap2/Anapc15/Zwint/Tpr/Mad2l1/Dync1li1/Pcid2/Cdca8/Spc25/Lcmt1/Zw10/Zfp207/Chfr/Mad2l1bp/Ccnb1/Bub1/Cenpe
GO:0097623	potassium ion export across plasma membrane	12	0.76019	1.56135	0.0380666	0.0380666	0.21137	889	tags=17%, list=6%, signal=16%	Kcnn4/Ano6
GO:0070314	G1 to G0 transition	15	0.723916	1.55116	0.0380666	0.0380666	0.21137	1504	tags=33%, list=10%, signal=30%	Cdk5r1/Ecrg4/Ezh2/Mybbp1a/Trp53
GO:0030323	respiratory tube development	186	-0.485615	-1.36742	0.0383037	0.0383037	0.212455	2529	tags=28%, list=17%, signal=23%	Tbx2/Wnt5a/Acvr2b/Sp1/Tgfb1/Mgp/Igfbp5/Gli3/Ppp3r1/Rdh10/Col6a1/Sec24b/Ncor2/Errfi1/Psen2/Rbbp9/Lipa/Loxl3/Tgfb3/Meg3/Heg1/Rab3a/Ccbe1/Sp3/Ltbp3/Tshz3/Tnrc6c/Smpd3/Cic/Cebpa/Hopx/Tgfbr2/Hs6st1/Hhex/Wwp1/Ep300/Thra/Asah1/Numa1/Ctsh/Klf2/Vegfa/Notch1/Pkdcc/Fosl2/Kdr/Hes1/Pdgfrb/Pdgfra/Ace/Nfib/Lama5
GO:0072657	protein localization to membrane	529	0.323602	1.16782	0.0386496	0.0386496	0.214142	2183	tags=23%, list=15%, signal=20%	Cdk5r1/S100a10/Ccl2/Tnf/Atp2b4/Itgam/Zdhhc18/Rapgef2/Hspa5/Ehd1/Stx3/Timm13/Cd24a/Anxa2/Ubl4a/Exoc5/Lgals3/Rab32/Cd81/Gripap1/Pik3r1/Ift20/Hras/Hsp90aa1/Pdcd5/Rab8b/Gsn/Sgta/Rap2a/Cib1/Timm10/Ppfia1/Ezr/Emc8/Hspa4/Slc5a3/Kif5b/Golga4/Vps35/Srp9/Rhbdf2/Tomm40/Stx4a/Tm9sf3/Bcl2l1/Itgb1/Srp14/Stac2/Stx8/Pdzd11/Rab34/Sec61b/Bsg/Bax/Sec63/Smurf1/Ldlrap1/Sacm1l/Tomm70a/Emc6/Flna/Rabep1/Slc7a11/Zdhhc5/O…
GO:0050878	regulation of body fluid levels	215	-0.48009	-1.36302	0.0387701	0.0387701	0.214576	833	tags=13%, list=6%, signal=13%	Sh2b3/Egfr/Enpp4/Zbtb7b/C1qtnf1/Plat/Stat5b/Ctns/F11r/Nfe2l2/Evl/St3gal4/Zfp385a/Hpse/Vegfa/Serping1/Mertk/Fosl2/Oas2/Thbs1/Tifab/Pdgfra/Axl/Apoe/Entpd2/Cav1/Thbd/Aplnr/Aqp1
GO:0099637	neurotransmitter receptor transport	18	0.675836	1.47079	0.0388941	0.0388941	0.214742	1451	tags=39%, list=10%, signal=35%	Stx3/Gripap1/Vps35/Stx4a/Sacm1l/Scrib/Rab11a
GO:0001894	tissue homeostasis	204	-0.48137	-1.35989	0.0389262	0.0389262	0.214742	876	tags=12%, list=6%, signal=12%	Ctss/Dram2/Il10ra/Gcnt2/Col14a1/Egfr/Idua/Ptgs1/Csf1r/Rac2/Csk/Slc28a2/Vegfa/Notch1/Fosl2/Wwtr1/Trf/Pdgfrb/Ccr2/Fcgr4/Nfib/Cd38/Cd34/Cldn5/Dlk1
GO:0060249	anatomical structure homeostasis	204	-0.48137	-1.35989	0.0389262	0.0389262	0.214742	876	tags=12%, list=6%, signal=12%	Ctss/Dram2/Il10ra/Gcnt2/Col14a1/Egfr/Idua/Ptgs1/Csf1r/Rac2/Csk/Slc28a2/Vegfa/Notch1/Fosl2/Wwtr1/Trf/Pdgfrb/Ccr2/Fcgr4/Nfib/Cd38/Cd34/Cldn5/Dlk1
GO:0035640	exploration behavior	24	-0.718967	-1.53806	0.0389986	0.0389986	0.21491	131	tags=17%, list=1%, signal=17%	Kmt2a/Apoe/Atp1a2/Agtr2
GO:0044270	cellular nitrogen compound catabolic process	448	0.320652	1.13264	0.0391145	0.0391145	0.215316	1701	tags=17%, list=12%, signal=15%	Aldoc/Pgk1/Pkm/Aldoa/Tpi1/Ampd3/Pfkl/Pgam1/Nupr1/Eno1/Vim/Gapdh/Hmox1/Myc/Gspt1/Carhsp1/Vcp/Lsm4/Pfkp/Mettl1/Ncbp2/Syncrip/Dera/Lrpprc/Dut/Gpi1/Hif1a/Itpa/Mrto4/Noct/Smg5/Galk1/Por/Rnaseh2c/Ybx1/Caprin1/Bax/Hnrnpd/E2f1/Srsf1/Dnph1/Zc3h18/Nsun2/Eif6/Pabpc4/Nudt3/Hnrnpab/Dhx9/Acot7/Hdac4/Mettl16/Hk3/Fus/Snd1/Htr2a/Etf1/Xdh/Lsm2/Lsm1/Npm1/Nudt5/Hint1/Fastk/Hk1/Tardbp/Plekhn1/Rock2/Cnot10/Rbm10/Lsm6/…
GO:0071174	mitotic spindle checkpoint signaling	45	0.54484	1.41059	0.0392046	0.0392046	0.21558	2973	tags=44%, list=20%, signal=36%	Spdl1/Spc24/Birc5/Cdk5rap2/Anapc15/Zwint/Tpr/Mad2l1/Dync1li1/Pcid2/Cdca8/Spc25/Lcmt1/Zw10/Stil/Zfp207/Mad2l1bp/Ccnb1/Bub1/Cenpe
GO:0030335	positive regulation of cell migration	509	-0.407291	-1.24512	0.0393519	0.0393519	0.216157	1274	tags=16%, list=9%, signal=15%	Cdh13/Nox4/Sema4d/Sema5a/Lpar1/Mcam/Cd40/Nrp1/Cd274/Plvap/Ednra/Ccl11/Aoc3/C3ar1/Rin2/Cx3cr1/P2ry12/Itga4/Fermt2/Dab2ip/Clasp2/Ddr2/Rhoj/Camk1d/Lgals9/Cd47/Casp8/Tgfbr2/Amot/Sema6d/Stk4/Gcnt2/Egfr/Sema6b/Csf1r/P2ry6/Rarres2/P2rx4/Insr/Stat3/Rhob/Nedd9/Lamb1/Stat5b/Rac2/Adamts1/Ccl24/Ctsh/Nfe2l2/Il6st/Cmklr1/Ssh2/Pik3cd/Sema4a/Vegfa/Akap12/Notch1/Ptafr/Kdr/Mmp2/Col18a1/Smoc2/Thbs1/Cxcr4/Tgfbr3/Pdg…
GO:0042113	B cell activation	237	-0.474146	-1.35872	0.0395778	0.0395778	0.217165	1414	tags=22%, list=10%, signal=20%	Zfp36l1/Laptm5/Sp3/Bmi1/Itm2a/Nfatc1/Mfng/Cd40/Zbtb1/Syk/Sash3/Kmt5c/Cebpg/Casp3/Zfp36l2/Bank1/Samsn1/Tnfrsf21/Ikzf1/Hhex/Ep300/Mef2c/Nfam1/Igbp1/Cd79b/Stat5b/Bcl6/Fcrl1/Cdkn1a/Cfb/Pou2f2/Notch2/Pik3cd/Fcgr2b/Lyl1/Fosl2/Icosl/Irf2bp2/Lfng/Irf8/Bcl3/Cd22/Cd300a/Card11/Cd28/Batf/Themis2/Cd74/Ighm/Cd38/H2-Ab1
GO:0000289	nuclear-transcribed mRNA poly(A) tail shortening	25	-0.717264	-1.54842	0.0400393	0.0400393	0.219461	1203	tags=28%, list=8%, signal=26%	Tnrc6c/Tnrc6a/Cnot6l/Tnrc6b/Zfp36/Btg2/Samd4
GO:0051250	negative regulation of lymphocyte activation	153	-0.501932	-1.37866	0.0401722	0.0401722	0.219953	826	tags=20%, list=6%, signal=19%	Bank1/Samsn1/Tnfrsf21/Tnfaip8l2/Fbxo7/Zbtb7b/Nfkbid/Dusp22/Il4ra/Bcl6/Hlx/Cebpb/H2-K1/H2-D1/Fcgr2b/Pla2g2d/Mertk/Fgl2/Lst1/H2-T22/Irf1/Cd300a/H2-Q4/H2-Q6/H2-Q7/Axl/H2-T23/Cd74/H2-Aa/Slfn1
GO:0051603	proteolysis involved in protein catabolic process	657	0.315381	1.15322	0.0403783	0.0403783	0.220822	2129	tags=22%, list=14%, signal=20%	Ccnf/Rnf128/Ecrg4/Plk2/Nupr1/Psmd1/Sirt1/Hspa5/Uhrf1/Mdm2/Hsp90b1/Isg15/Cacul1/Vcp/Tollip/Ubl4a/Capn2/Psmb5/N4bp1/Sdf2l1/Uchl3/Ube2a/Peli1/Park7/Psmd7/Psmd8/Sel1l/Psmb3/Pmp22/Sgta/Psmc5/Rnf19b/Calr/Rnf19a/Psmb6/Gipc1/Man1a/Psmd13/Hsp90ab1/Canx/Ube2g2/Chmp2b/Fbxo22/Dnajc3/Oaz1/Psmb7/Ndfip2/Rad23b/Fbxw11/Nedd4l/Lonp1/Faf1/Ubxn4/Znrf1/Psmd2/Psmd11/Psmd6/Fbxo11/Ubqln1/Sec61b/Clpx/Trim26/Nfe2l1/Gclc/A…
GO:0043491	phosphatidylinositol 3-kinase/protein kinase B signal transduction	252	-0.464675	-1.34296	0.0404172	0.0404172	0.220822	1272	tags=17%, list=9%, signal=16%	Nox4/Sema4d/Sema5a/Cd40/Flcn/Smpd3/Cx3cr1/P2ry12/Fermt2/Dab2ip/Serpine2/Gcnt2/Sh2b3/Bank1/Egfr/Csf1r/Eng/Hcst/Osm/P2rx4/Insr/Stat3/Sesn1/C1qtnf1/Dcn/Col6a2/Ddit3/Hpse/Pik3cd/Vegfa/Mertk/Tcf7l2/Atp1a3/Vav2/Kdr/Gdf15/Thbs1/Pdgfrb/Cd28/Pdgfra/Axl/Cxcl12/Flt1/Igf2
GO:0060993	kidney morphogenesis	68	-0.608075	-1.49486	0.0408163	0.0408163	0.222764	551	tags=12%, list=4%, signal=11%	Sox4/Ctns/Pbx1/Vegfa/Wwtr1/Hes1/Lama5/Agtr2
GO:0002573	myeloid leukocyte differentiation	241	-0.470755	-1.35218	0.0408971	0.0408971	0.222966	979	tags=16%, list=7%, signal=15%	Cebpa/Casp8/Tgfbr2/Tob2/Klf10/Ikzf1/Hhex/Csf1r/Evi2/Mef2c/Ucp2/Myd88/Trib1/Nedd9/Cebpb/Junb/Rara/Notch2/Vegfa/Fos/Nrros/Ifi204/Fosl2/Sbno2/Trf/Pilrb1/Cbfa2t3/Ifi203/Batf3/Mndal/Batf/Ifi211/Ifi209/Cd74/Clec2i/Ifi206/Ifi213/Dlk1
GO:0002714	positive regulation of B cell mediated immunity	47	-0.646793	-1.51009	0.0412541	0.0412541	0.224434	543	tags=21%, list=4%, signal=21%	Fcgr3/H2-K1/H2-D1/H2-T22/Fcgr1/H2-Q4/H2-Q6/Cd28/H2-Q7/H2-T23
GO:0002891	positive regulation of immunoglobulin mediated immune response	47	-0.646793	-1.51009	0.0412541	0.0412541	0.224434	543	tags=21%, list=4%, signal=21%	Fcgr3/H2-K1/H2-D1/H2-T22/Fcgr1/H2-Q4/H2-Q6/Cd28/H2-Q7/H2-T23
GO:0050727	regulation of inflammatory response	300	-0.449221	-1.32449	0.0414053	0.0414053	0.224875	1223	tags=19%, list=8%, signal=18%	Ash1l/Akna/Pparg/Aoc3/Nr1d1/Sod1/Cx3cr1/Mefv/Nmi/Casp12/Abhd12/Lgals9/Cebpa/Cd47/Gsdmd/Gstp1/Ctss/Il10ra/Ifi35/Tnfaip8l2/Pdcd4/Mgll/Csf1r/Elf4/Daglb/Osm/Stat3/Myd88/Tnfrsf1a/Stat5b/Fcgr3/Bcl6/Ccl24/Cebpb/Igtp/H2-K1/Irgm2/H2-D1/Fcgr2b/Pla2g2d/Zfp36/Sbno2/H2-T22/Ccr5/Fcgr1/H2-Q4/H2-Q6/Cd28/Ccr2/H2-Q7/Irgm1/Adamts12/H2-T23/Apoe/Zbp1/Il16/Tslp/Cdh5
GO:0016053	organic acid biosynthetic process	210	0.37083	1.2063	0.0414253	0.0414253	0.224875	1234	tags=15%, list=8%, signal=14%	Edn1/Dhrs9/Pkm/Ass1/Mif/Atp2b4/Ldha/Mgst3/Anxa1/Slc38a1/Sirt1/Ndufab1/Fads1/Park7/Hsd17b12/Alox5/Fabp5/Stard4/Insig1/Prxl2b/Per2/Bcat2/Alox5ap/Mthfd2l/Got2/Degs1/Shmt2/Eif6/Nr1h3/Mthfd1/Acot7/Ptges3
GO:0002711	positive regulation of T cell mediated immunity	57	-0.634376	-1.52603	0.0414673	0.0414673	0.224875	1448	tags=30%, list=10%, signal=27%	P2rx7/H2-Q10/Zbtb1/Sash3/H2-T24/Tap2/B2m/Dennd1b/H2-K1/H2-D1/H2-M3/H2-T22/Arid5a/H2-Q4/H2-Q6/H2-Q7/H2-T23
GO:0050864	regulation of B cell activation	125	-0.518334	-1.38699	0.0416667	0.0416667	0.225717	1414	tags=21%, list=10%, signal=19%	Zfp36l1/Laptm5/Bmi1/Cd40/Syk/Sash3/Kmt5c/Casp3/Zfp36l2/Bank1/Samsn1/Tnfrsf21/Mef2c/Nfam1/Stat5b/Bcl6/Cdkn1a/Fcgr2b/Cd22/Cd300a/Card11/Cd28/Themis2/Cd74/Ighm/Cd38
GO:0070307	lens fiber cell development	12	0.749227	1.53884	0.0419051	0.0419051	0.226768	787	tags=25%, list=5%, signal=24%	Vim/Atf4/Smarca4
GO:0008015	blood circulation	367	-0.434523	-1.29697	0.0423216	0.0423216	0.22878	1221	tags=16%, list=8%, signal=15%	Uty/Pparg/Smpd3/Tnni2/Plvap/Ednra/Aoc3/C3ar1/Sod1/Itga4/Fermt2/Gna12/Dusp5/Ndst2/Hopx/Fxyd1/Grk2/Amot/Abcc9/Tbxas1/Mdm4/Egfr/Fli1/Ptp4a3/Ptgs1/Mgll/Eng/Rarres2/Thra/P2rx4/Pde4b/Acvrl1/F11r/Klf2/Snx5/Zfas1/Agtrap/Vegfa/Akap12/Jup/Atp1a3/Myl1/Ptafr/Kdr/Mmp2/Itga1/Cxcr4/Tgfbr3/Apoe/Actc1/Ace/Cav1/Cd38/Atp1a2/Ramp2/Cldn5/Agtr2/Cdh5
GO:2001237	negative regulation of extrinsic apoptotic signaling pathway	84	0.467613	1.36089	0.0424165	0.0424165	0.228843	1704	tags=25%, list=12%, signal=22%	Tnf/Serpine1/Cflar/Hmox1/Gclm/Lmna/Lgals3/Park7/Itgav/Pea15a/Itga6/Bcl2l1/Prdx2/Gclc/Map2k5/Dab2/Hmgb2/Gsk3b/Faim/Bcl2/Rps6kb1
GO:0035308	negative regulation of protein dephosphorylation	24	0.642031	1.48401	0.0424229	0.0424229	0.228843	2044	tags=46%, list=14%, signal=40%	Tnf/Ppp1r15a/Ywhae/Swap70/Ywhab/Ppp1r11/Rock2/Mastl/Ptpa/Rock1/Nckap1l
GO:0048278	vesicle docking	53	0.528925	1.41655	0.0429002	0.0429002	0.231173	1238	tags=23%, list=8%, signal=21%	Stx11/Stx3/Exoc5/Cep83/Uso1/Ykt6/Rab8b/Ralb/Stx4a/Stx8/Exoc6b/Rab3d
GO:0002726	positive regulation of T cell cytokine production	30	-0.702182	-1.53111	0.0434783	0.0434783	0.233696	610	tags=33%, list=4%, signal=32%	H2-Q10/Sash3/B2m/Dennd1b/H2-K1/H2-D1/Arid5a/H2-Q4/H2-Q6/H2-Q7
GO:0034976	response to endoplasmic reticulum stress	231	0.371079	1.22181	0.0435052	0.0435052	0.233696	1561	tags=23%, list=11%, signal=21%	Bbc3/Nupr1/Ppp1r15a/Hyou1/Sirt1/Hspa5/Manf/Hsp90b1/Vcp/Pdia6/Pdia4/Sdf2l1/Pik3r1/Uba5/Park7/Alox5/Sel1l/Pmp22/Sgta/Calr/Dnm1l/Ufm1/Man1a/Canx/Ube2g2/Atf4/Dnajc3/Ccnd1/Faf1/Eif2s1/Eif4g1/Ubxn4/Bcl2l1/Pdia3/Ubqln1/Sec61b/Nfe2l1/Bax/Bak1/Selenos/Nr1h3/Ube2k/Eif2b5/Ccdc47/Dnajb9/Stub1/Gsk3b/P4hb/Tmed2/Trp53/Usp14/Edem3/Uggt1
GO:0007094	mitotic spindle assembly checkpoint signaling	43	0.543619	1.39523	0.0435514	0.0435514	0.233696	2973	tags=44%, list=20%, signal=35%	Spdl1/Spc24/Birc5/Cdk5rap2/Anapc15/Zwint/Tpr/Mad2l1/Dync1li1/Pcid2/Cdca8/Spc25/Lcmt1/Zw10/Zfp207/Mad2l1bp/Ccnb1/Bub1/Cenpe
GO:0071173	spindle assembly checkpoint signaling	43	0.543619	1.39523	0.0435514	0.0435514	0.233696	2973	tags=44%, list=20%, signal=35%	Spdl1/Spc24/Birc5/Cdk5rap2/Anapc15/Zwint/Tpr/Mad2l1/Dync1li1/Pcid2/Cdca8/Spc25/Lcmt1/Zw10/Zfp207/Mad2l1bp/Ccnb1/Bub1/Cenpe
GO:0106027	neuron projection organization	100	0.439125	1.31711	0.0437079	0.0437079	0.23427	1196	tags=16%, list=8%, signal=15%	Cdk5r1/Arc/Lrp8/Baiap2/Abl2/Pdlim5/Dnm1l/Dock10/Vps35/Caprin2/Diaph1/Caprin1/Dbnl/Cfl1/Diaph2/Pafah1b1
GO:0072091	regulation of stem cell proliferation	79	-0.574812	-1.44052	0.04375	0.04375	0.23427	1827	tags=30%, list=12%, signal=27%	Wnt11/Pdcd2/Lrp6/Snai2/Kitl/Hdac5/Zfp36l1/Ltbp3/Nfatc1/Rarg/Fermt2/Cebpa/Ncoa3/Tgfbr2/Prrx1/Pim1/Eif2ak2/Pbx1/Notch1/Kdr/Irgm1/Ace/Nfib/Sox18
GO:0060541	respiratory system development	208	-0.480288	-1.35985	0.043883	0.043883	0.234736	2348	tags=26%, list=16%, signal=22%	Tgfb1/Mgp/Igfbp5/Gli3/Ppp3r1/Rdh10/Col6a1/Sec24b/Ncor2/Errfi1/Psen2/Msx1/Rbbp9/Lipa/Ski/Six1/Loxl3/Tgfb3/Meg3/Heg1/Lrp6/Rab3a/Ccbe1/Sp3/Ltbp3/Tshz3/Tnrc6c/Smpd3/Rarg/Cic/Cebpa/Hopx/Tgfbr2/Hs6st1/Hhex/Wwp1/Ep300/Thra/Asah1/Numa1/Ctsh/Klf2/Rara/Vegfa/Notch1/Pkdcc/Fosl2/Kdr/Hes1/Pdgfrb/Pdgfra/Ace/Nfib/Lama5
GO:1903532	positive regulation of secretion by cell	265	0.356225	1.20713	0.0440984	0.0440984	0.235641	1269	tags=14%, list=9%, signal=13%	Edn1/S100a10/Ecrg4/Mif/Mmp13/Itgam/Kcnn4/Rgcc/Sirt1/Anxa2/Sdc4/Lgals3/Stxbp5/Dynll1/Rab8b/Myh9/Dnm1l/Adam9/Kif5b/Vps35/Gpr68/Ppia/Prkar1a/Hif1a/Stx4a/Bcl2l1/Spp1/Rab34/Bsg/Anxa7/Pdcd6ip/Oga/Rab7/Glud1/Arhgef7/Rab3d/Dab2/Vamp7
GO:0006929	substrate-dependent cell migration	27	0.627305	1.48968	0.0443017	0.0443017	0.236481	1118	tags=19%, list=8%, signal=17%	Cspg4/Abl2/Adam8/Shtn1/Pdgfb
GO:0009395	phospholipid catabolic process	41	-0.662851	-1.51369	0.0444079	0.0444079	0.2368	1187	tags=27%, list=8%, signal=25%	Smpd3/Abhd12/Idh1/Scarb1/Apoc2/Gdpd1/Gpcpd1/Pnpla7/Plbd1/Pla2g15/Apoc1
GO:0032228	regulation of synaptic transmission, GABAergic	24	0.637658	1.47391	0.0444592	0.0444592	0.236826	637	tags=12%, list=4%, signal=12%	Dbi/Slc38a1/Kif5b
GO:0043161	proteasome-mediated ubiquitin-dependent protein catabolic process	344	0.344046	1.18342	0.0446412	0.0446412	0.237328	2129	tags=22%, list=14%, signal=20%	Ccnf/Ecrg4/Plk2/Psmd1/Sirt1/Mdm2/Vcp/Psmb5/N4bp1/Ube2a/Peli1/Park7/Psmd7/Psmd8/Psmb3/Pmp22/Psmc5/Psmb6/Gipc1/Fbxo22/Psmb7/Rad23b/Fbxw11/Nedd4l/Znrf1/Psmd2/Psmd6/Trim26/Gclc/Agap3/Ube2n/Psmc3/Smurf1/Psma3/Psmc4/Ube2k/Ascc3/Ddb1/Plk3/Psma2/Clock/Dab2/Psmd10/Fbxl15/Spsb4/Stub1/Ube2d3/Psmb4/Dcaf13/Gsk3b/Psma7/Ube2v2/Naglu/Usp14/Hspbp1/Edem3/Kctd5/Kat5/Commd1/Psmb2/Psma6/Fbxo45/Psmc1/Rpl11/Rnf126/Psma…
GO:0002639	positive regulation of immunoglobulin production	57	-0.620642	-1.49299	0.0446571	0.0446571	0.237328	1404	tags=25%, list=10%, signal=22%	H2-Q10/Cd37/Cd40/Sash3/Kmt5c/Il4ra/H2-K1/H2-D1/H2-T22/H2-Q4/H2-Q6/Cd28/H2-Q7/H2-T23
GO:0042594	response to starvation	164	-0.488092	-1.35083	0.0446927	0.0446927	0.237328	1002	tags=16%, list=7%, signal=15%	Tnrc6a/Ulk1/Klf10/Pck2/Eif2ak2/Rnf167/Tbc1d5/Foxo3/Gpr155/Sesn1/Plin2/Cdkn1a/Nfe2l2/Ddit3/Nuak2/Zfp36/Ifi204/Tcf7l2/Impact/Bmf/Ifi203/Mndal/Ifi211/Ifi209/Ifi206/Ifi213
GO:1901699	cellular response to nitrogen compound	507	-0.406535	-1.2436	0.0449827	0.0449827	0.238549	1568	tags=17%, list=11%, signal=16%	Enpp1/Slc38a9/Tlr4/Leprot/Pde3a/Folr2/Prkaca/P2rx7/Ppp1r9b/Pde12/Kat2b/Zfp36l1/Sgcb/Pde2a/Foxo4/Akap7/Map3k5/Trim41/Pparg/Smpd3/Vamp2/Ednra/Sorbs2/C2cd5/P2ry12/Itga4/Pxn/Casp3/Ddi2/Palm/Rgs10/Grk2/Usf1/Pip4k2a/Egfr/Casp6/Pck2/Ncoa2/Cgas/P2ry6/Rarres2/Ep300/P2rx4/Mef2c/Insr/Adipor1/Zbtb7b/Stat3/Pdk2/Sesn1/Stat5b/Nfe2l2/Orai1/Csk/Daxx/Snx5/Sorl1/Marcks/Cebpb/Agtrap/Nr4a1/Fcgr2b/Eif4ebp2/Jup/Atp1a3/…
GO:0002886	regulation of myeloid leukocyte mediated immunity	64	-0.616513	-1.49509	0.0450161	0.0450161	0.238549	550	tags=27%, list=4%, signal=26%	Syk/Ticam2/Cx3cr1/Rac2/Fcgr3/Il4ra/H2-K1/H2-D1/Ptafr/H2-T22/Cd300a/Fcgr1/H2-Q4/H2-Q6/Ccr2/H2-Q7/H2-T23
GO:0030490	maturation of SSU-rRNA	47	0.532386	1.40311	0.04518	0.04518	0.23917	2745	tags=43%, list=19%, signal=35%	Rrs1/Nat10/Gtf2h5/Riok3/Nol7/Bysl/Utp6/Wdr43/Dcaf13/Nol11/Tsr1/Nop14/Lsm6/Srfbp1/Bms1/Ddx52/Tbl3/Rps8/Wdr46/Rps19
GO:0099601	regulation of neurotransmitter receptor activity	25	0.648942	1.51235	0.0452768	0.0452768	0.239255	975	tags=20%, list=7%, signal=19%	Arc/Shisa9/Adrb2/Dapk1/Homer3
GO:0002043	blood vessel endothelial cell proliferation involved in sprouting angiogenesis	20	-0.748585	-1.5563	0.0452899	0.0452899	0.239255	375	tags=20%, list=3%, signal=20%	Sema5a/Vegfa/Thbs1/Aplnr
GO:0040013	negative regulation of locomotion	293	-0.449542	-1.32137	0.045512	0.045512	0.24018	1632	tags=22%, list=11%, signal=20%	Cdh11/Rbbp4/Sema4b/Ppard/Cd200/Ptprg/Ripor2/Hdac5/Igfbp3/Phldb2/Zmynd8/Sulf1/Abhd2/Tie1/Scai/Sema4d/Sema5a/Pparg/Flcn/Nrp1/Cx3cr1/S1pr2/Dab2ip/Gna12/Clasp2/Gstp1/Sema6d/Arid4a/Sema6b/Eng/C5ar2/Mef2c/Adipor1/Stat3/Rhob/Acvrl1/Trib1/Nedd9/Dusp22/Trp53inp1/Dcn/Nfe2l2/Evl/Rin3/Sema4a/Bst2/Notch1/Jup/Arrdc3/Thbs1/Cd300a/Nbl1/Cygb/Sp100/Tgfbr3/Meox2/Apoe/Cd74/Cxcl12/Apod/Cav1/Egfl7/Cldn5
GO:0070841	inclusion body assembly	24	0.636182	1.47049	0.0458167	0.0458167	0.241044	554	tags=21%, list=4%, signal=20%	Ifnb1/Vcp/Pmp22/Psmc5/Hspa2
GO:0090279	regulation of calcium ion import	34	-0.684527	-1.53297	0.0459184	0.0459184	0.241044	244	tags=21%, list=2%, signal=20%	Slc30a1/Hes1/Cxcr4/Pdgfrb/Cxcl12/Ace/Cav1
GO:2000352	negative regulation of endothelial cell apoptotic process	26	-0.705548	-1.51911	0.0459364	0.0459364	0.241044	505	tags=15%, list=3%, signal=15%	Nfe2l2/Kdr/Ramp2/Cdh5
GO:0006470	protein dephosphorylation	201	-0.476638	-1.34389	0.0459459	0.0459459	0.241044	802	tags=12%, list=5%, signal=11%	Cnep1r1/Ptpro/Pink1/Ppp2r3d/Ptpn18/Gna12/Dusp5/Vrk3/Ctdsp1/Ptp4a3/Igbp1/Dusp22/Ankle2/Ssh2/Ctdsp2/Dusp2/Itga1/Cd300a/Dusp6/Pdgfrb/Ptprd/Ptprb/Agtr2/Cdh5
GO:0035050	embryonic heart tube development	69	-0.595894	-1.46312	0.0459588	0.0459588	0.241044	895	tags=14%, list=6%, signal=14%	Tgfbr2/Hhex/Eng/Mef2c/Notch2/Notch1/Tmem94/Hes1/Aplnr/Sox18
GO:0040014	regulation of multicellular organism growth	69	-0.594572	-1.45987	0.0459588	0.0459588	0.241044	1119	tags=25%, list=8%, signal=23%	Fto/Socs2/Smo/Bbs4/Pex5/Sod1/Atxn2/Ikzf1/Stat3/Stat5b/Daxx/H19/Fosl2/Gdf15/Plac8/Ghr/Igf2
GO:0005996	monosaccharide metabolic process	214	0.382181	1.24635	0.0460102	0.0460102	0.241057	1654	tags=22%, list=11%, signal=20%	Aldoc/Pgk1/Pkm/Aldoa/Tpi1/Tnf/Pfkl/Pgam1/Pdk1/Ldha/Eno1/Gapdh/Sirt1/Myc/Pgm1/Pfkp/Pgd/Pik3r1/Pgp/Fuom/Fabp5/Per2/Atf4/Gpi1/Hif1a/Pgm2l1/Nln/Galk1/Slc23a2/Nfe2l1/Gclc/Pdk3/Man2a2/Ddb1/Pik3ca/Hk3/Acadm/Mdh2/Gpt2/Ppp4r3a/Epm2aip1/Trp53/Nudt5/Slc25a13/Hk1/Slc25a11/Ranbp2/Ppp1r3e
GO:1902115	regulation of organelle assembly	207	0.374987	1.22432	0.0460556	0.0460556	0.241057	2585	tags=25%, list=18%, signal=21%	Tnf/Plk2/Nupr1/Syne1/Sdc4/Ift20/Lcp1/Smcr8/Dynll1/Gsn/G3bp1/Nup62/Ezr/Chmp2b/Ralb/Scfd1/Usp10/Caprin1/Dnm2/Senp6/Pdcd6ip/Atg5/Cdk5rap2/Msn/Gsk3b/Rab11a/Sec22b/Tpr/Npm1/Arpc2/Chmp6/Ccsap/Nf2/Tbc1d30/Snx7/Entr1/Ift46/Stx18/Sh3glb1/Tapt1/Rab3gap2/Map4/Chmp2a/Ppp1r35/Snx4/Pip4k2b/Sipa1l1/Stil/Mtor/Cript/Wrap73
GO:0048670	regulation of collateral sprouting	18	-0.764277	-1.55566	0.0461255	0.0461255	0.241175	1591	tags=28%, list=11%, signal=25%	Ist1/Sema4d/Ulk1/Ifrd1/Rgma
GO:0002720	positive regulation of cytokine production involved in immune response	82	-0.567621	-1.4282	0.0464396	0.0464396	0.24257	1550	tags=28%, list=11%, signal=25%	Tlr4/P2rx7/H2-Q10/Laptm5/Spon2/Syk/Ticam2/Sash3/Irf5/Tlr7/Myd88/B2m/Dennd1b/H2-K1/H2-D1/H2-T22/Arid5a/H2-Q4/H2-Q6/H2-Q7/H2-T23/Scimp/Cd74
GO:0031667	response to nutrient levels	294	-0.446279	-1.31297	0.0465995	0.0465995	0.242956	2341	tags=27%, list=16%, signal=23%	Jmy/Ulk3/Srebf1/Zfyve1/Atf2/Ifi208/Mn1/Col6a1/Tfeb/Pmaip1/Mtmr3/Bmt2/Hfe/Ttc5/Prkch/Lipa/Acaa1a/Sesn3/Eif2ak1/Jun/Pld1/Mapk14/Clic5/Lrp6/Snai2/Angptl4/Bbs4/Ppard/Enpp1/Snw1/Folr2/Kptn/Kat2b/Map3k5/Ifi214/Glul/Pparg/Flcn/Sod1/Gdf3/Tnrc6a/Ulk1/Hlcs/Usf1/Klf10/Pck2/Pim1/Eif2ak2/Rnf167/Ep300/Tbl1xr1/Tbc1d5/Insr/Foxo3/Pdk2/Gpr155/Gatm/Sesn1/Parp2/Plin2/Cdkn1a/Nfe2l2/Sorl1/Cdkn2d/Ddit3/Nuak2/Zfp36/Ifi2…
GO:0032787	monocarboxylic acid metabolic process	462	0.327133	1.15754	0.0466433	0.0466433	0.242956	1714	tags=18%, list=12%, signal=16%	Slc16a3/Aldoc/Edn1/Pgk1/Dhrs9/Pkm/Aldoa/Tpi1/Pfkl/Pgam1/Mif/Pdk1/Ldha/Nupr1/Eno1/Bdh2/Gapdh/Mgst3/Anxa1/Dbi/Slc38a1/Grhpr/Sirt1/Myc/Pdpn/Pfkp/Ndufab1/Fads1/Slc27a1/Pgd/Park7/Hsd17b12/Alox5/Adh5/Fabp5/Acsl1/Stard4/Abcd4/Insig1/Prxl2b/Per2/C3/Gpi1/Alox5ap/Hif1a/Ptgr1/Galk1/Por/Mpc1/Mtln/Pdzd11/Nfe2l1/Hsd17b4/Degs1/Eif6/Nr1h3/Etfb/Pdk3/Acot7/Hdac4/Ptges3/Hk3/Acadm/Htr2a/Mpc2/Mthfd1l/Acbd5/Nucb2/Lpin…
GO:0046718	symbiont entry into host cell	74	-0.584931	-1.45657	0.0466563	0.0466563	0.242956	1184	tags=26%, list=8%, signal=24%	Nrp1/Trim11/Trim34a/Trim8/Nectin4/Grk2/Siglec1/Trim25/Insr/Trim12a/Trim12c/Trim30a/Trim30d/Ly6e/Ifitm3/Axl/Cd74/Cav1/Ciita
GO:0010562	positive regulation of phosphorus metabolic process	638	-0.395381	-1.22617	0.0469799	0.0469799	0.244124	1210	tags=14%, list=8%, signal=13%	Cd40/Flcn/Nrp1/Syk/Ednra/Fzd7/Flt3l/Tspan9/Il15/Cx3cr1/Prxl2c/Fermt2/Il6ra/S1pr2/Pxn/Dab2ip/Gna12/Ddr2/Peli2/Mob3c/Ip6k2/Map3k11/Stk4/Bank1/Egfr/Vrk3/Pim1/Ehd4/Ccnd2/Ang/Crebl2/Csf1r/Eng/P2ry6/Rarres2/Ep300/Osm/Fgd4/Mef2c/Insr/Stat3/Zbtb20/Cdk2ap1/Chp2/Abi3/Igbp1/Nedd9/Tnfrsf1a/Apoc2/Cdkn1a/Cdkn1b/Il6st/Daxx/Ankle2/Map3k1/Fgd2/Parp14/Igtp/Tlr1/Notch2/Irgm2/Vegfa/Mertk/Grb10/Ptafr/Kdr/Hes1/Parp9/I…
GO:0045937	positive regulation of phosphate metabolic process	638	-0.395381	-1.22617	0.0469799	0.0469799	0.244124	1210	tags=14%, list=8%, signal=13%	Cd40/Flcn/Nrp1/Syk/Ednra/Fzd7/Flt3l/Tspan9/Il15/Cx3cr1/Prxl2c/Fermt2/Il6ra/S1pr2/Pxn/Dab2ip/Gna12/Ddr2/Peli2/Mob3c/Ip6k2/Map3k11/Stk4/Bank1/Egfr/Vrk3/Pim1/Ehd4/Ccnd2/Ang/Crebl2/Csf1r/Eng/P2ry6/Rarres2/Ep300/Osm/Fgd4/Mef2c/Insr/Stat3/Zbtb20/Cdk2ap1/Chp2/Abi3/Igbp1/Nedd9/Tnfrsf1a/Apoc2/Cdkn1a/Cdkn1b/Il6st/Daxx/Ankle2/Map3k1/Fgd2/Parp14/Igtp/Tlr1/Notch2/Irgm2/Vegfa/Mertk/Grb10/Ptafr/Kdr/Hes1/Parp9/I…
GO:0002695	negative regulation of leukocyte activation	173	-0.479603	-1.33996	0.0470263	0.0470263	0.244124	1965	tags=31%, list=13%, signal=27%	Ndfip1/Ptpn2/Cblb/Gimap5/Vsir/Milr1/Mdk/Loxl3/Tmem131l/Rassf5/Cd200/Runx3/Ripor2/H2-Q10/Cd37/Laptm5/Itch/Mad1l1/Pparg/Cd274/Nr1d1/Casp3/Lgals9/Bank1/Samsn1/Tnfrsf21/Tnfaip8l2/Fbxo7/Zbtb7b/Nfkbid/Dusp22/Il4ra/Bcl6/Hlx/Cebpb/H2-K1/H2-D1/Fcgr2b/Pla2g2d/Mertk/Fgl2/Lst1/H2-T22/Irf1/Cd300a/H2-Q4/H2-Q6/H2-Q7/Axl/H2-T23/Cd74/H2-Aa/Slfn1
GO:0042391	regulation of membrane potential	300	0.341893	1.16358	0.0470718	0.0470718	0.244124	1021	tags=12%, list=7%, signal=12%	Edn1/Bnip3/Tnf/Plk2/Baiap2/Kcnn4/Gclm/Myc/Smad7/Il1rn/Vcp/Prelid1/Calm3/Adrb2/Park7/Dynll1/Pmp22/Sod2/Atp1a1/Bin1/Shtn1/Ywhah/Cd36/Kif5b/Nedd4l/Kcnab2/Bcl2l1/Wdr1/Calm1/Atp2a2/Mtln/Ywhae/Ano6/Bax/Gclc/Akap9/Bak1
GO:0030098	lymphocyte differentiation	383	-0.424149	-1.27174	0.0472727	0.0472727	0.244918	1414	tags=19%, list=10%, signal=17%	Zfp36l1/Laptm5/Sp3/Smarcc2/Bmi1/Kdelr1/Itm2a/Nfatc1/Kmt2a/Mfng/Pknox1/Zbtb1/Syk/Fzd7/Flt3l/Il15/Sash3/Cebpg/Il6ra/Lgals9/Tgfbr2/Zfp36l2/Arid1a/Sh2b3/Ikzf1/Ifnar2/Hhex/Fbxo7/Wwp1/Ep300/Nfam1/Zbtb7b/Stat3/Nfkbid/B2m/Cd79b/Stat5b/Sox4/Il4ra/Bcl6/Hlx/Pbx1/Ly9/Igtp/Rara/Pou2f2/Notch2/Sema4a/Pla2g2d/Lyl1/Mertk/Fosl2/Irf2bp2/Lfng/Fgl2/Cd83/Irf8/Bcl3/Zeb1/Rhoh/Irf1/Card11/Cd28/Ccr2/Batf/Axl/H2-DMa/Nfil3/…
GO:1904950	negative regulation of establishment of protein localization	123	0.420862	1.28528	0.0475025	0.0475025	0.245859	701	tags=14%, list=5%, signal=13%	Ifnb1/Cyp51/Pfkl/Rab11fip1/Anxa1/Txn1/Bag3/Park7/Rest/Ufm1/Insig1/Ube2g2/Ccn3/Cd36/Ndfip2/Ptpmt1/Rhbdf2
GO:0035909	aorta morphogenesis	34	-0.671492	-1.50378	0.047619	0.047619	0.246119	895	tags=26%, list=6%, signal=25%	Tgfbr2/Kat6a/Eng/Acvrl1/Sox4/Notch1/Hes1/Pdgfrb/Mylk
GO:0009176	pyrimidine deoxyribonucleoside monophosphate metabolic process	15	0.706947	1.5148	0.047663	0.047663	0.246119	2023	tags=40%, list=14%, signal=35%	Nme1/Nme2/Dut/Tyms/Upp2/Nt5c
GO:0046503	glycerolipid catabolic process	41	-0.659749	-1.50661	0.0476974	0.0476974	0.246119	1429	tags=34%, list=10%, signal=31%	Lipe/Abhd2/Pnpla2/Abhd12/Mgll/Daglb/Scarb1/Apoc2/Gdpd1/Gpcpd1/Pnpla7/Sorl1/Pla2g15/Apoc1
GO:0009168	purine ribonucleoside monophosphate biosynthetic process	20	0.667819	1.48624	0.0477768	0.0477768	0.24628	1068	tags=25%, list=7%, signal=23%	Ampd3/Aprt/Impdh1/Gmpr/Nudt2
GO:0048515	spermatid differentiation	130	0.408125	1.26476	0.0479437	0.0479437	0.246781	1791	tags=15%, list=12%, signal=13%	Ddias/Zmynd15/Xlr/Agfg1/Cib1/Tmem119/Hspa2/Pebp1/Bax/Nsun2/Pafah1b1/Hmgb2/Ttll5/Mast2/Selenof/Tarbp2/Tbpl1/Kat5/Vdac3
GO:0060340	positive regulation of type I interferon-mediated signaling pathway	18	-0.763354	-1.55378	0.0479705	0.0479705	0.246781	210	tags=22%, list=1%, signal=22%	Trim41/Nlrc5/Zbp1/Irf7
GO:0036303	lymph vessel morphogenesis	22	-0.721557	-1.50706	0.0480591	0.0480591	0.246988	1637	tags=32%, list=11%, signal=28%	Ccbe1/Pkd1/Tie1/Nfatc1/Acvrl1/Vegfa/Sox18
GO:0042130	negative regulation of T cell proliferation	73	-0.580699	-1.44273	0.0482866	0.0482866	0.247908	1495	tags=30%, list=10%, signal=27%	Ripor2/H2-Q10/Cd37/Laptm5/Itch/Mad1l1/Cd274/Casp3/Lgals9/Tnfrsf21/Zbtb7b/Cebpb/H2-K1/H2-D1/Pla2g2d/H2-T22/H2-Q4/H2-Q6/H2-Q7/H2-T23/H2-Aa/Slfn1
GO:0000280	nuclear division	358	0.346535	1.19045	0.0488605	0.0488605	0.250603	2804	tags=30%, list=19%, signal=25%	Dnmt3l/Edn1/Tnf/Rrs1/Mki67/Wnt4/Spire1/Rgcc/Sirt1/Uhrf1/Ran/Ranbp1/Kif2a/Spdl1/Calr/Nup62/Brox/Spc24/Psmd13/Hspa2/Chmp2b/Ywhah/Pebp1/Pinx1/Ncapg2/Cdt1/Eps8/Cenpx/Rps6ka2/Cenps/Ccnb2/Nfe2l1/Mapre1/Birc5/Flna/Pdgfb/Ddb1/Smc3/Cdk5rap2/Ctdp1/Syce2/Anapc15/Dcaf13/Gsk3b/Fancm/Zwint/Rab11a/Spast/Topbp1/Tpr/Mad2l1/Dync1li1/Banf1/Espl1/Chmp6/Ncaph2/Ccsap/Mastl/Nsmce2/Tdrkh/Kat5/Rangrf/Kif3b/Wapl/Pcid2/Ppp…
GO:0002228	natural killer cell mediated immunity	66	-0.601718	-1.46968	0.0489731	0.0489731	0.250928	559	tags=23%, list=4%, signal=22%	Cebpg/Lgals9/Tap2/Stat5b/H2-K1/H2-D1/Tap1/H2-M3/H2-T22/H2-Q4/H2-Q6/H2-Q7/Fcgr4/H2-T23/Igf2
GO:0003012	muscle system process	342	-0.42823	-1.27405	0.04914	0.04914	0.251333	1438	tags=15%, list=10%, signal=14%	Tnfrsf1b/Ece1/Agrn/Sulf1/Pi16/Smtn/Cttn/Nfatc1/Tshz3/Uty/Pparg/Smpd3/Tnni2/Ednra/Calcrl/Sorbs2/Sod1/Fxyd1/Grk2/Abcc9/Col14a1/Ptgs1/Ep300/P2rx4/Mef2c/Pde4b/Foxo3/Gatm/Parp2/Tnfrsf1a/Zfas1/Nr4a1/Notch1/Jup/Mylpf/Atp1a3/Myl1/Ptafr/Tnnc2/Cxcr4/Fbxo32/Tifab/Mylk/Actc1/Atp2a1/Flt1/Cav1/Cd38/Atp1a2/Myh11/Agtr2
GO:0019941	modification-dependent protein catabolic process	528	0.320624	1.15681	0.0491505	0.0491505	0.251333	2166	tags=22%, list=15%, signal=19%	Ccnf/Rnf128/Ecrg4/Plk2/Psmd1/Sirt1/Uhrf1/Mdm2/Isg15/Cacul1/Vcp/Tollip/Ubl4a/Psmb5/N4bp1/Uchl3/Ube2a/Peli1/Park7/Psmd7/Psmd8/Psmb3/Pmp22/Sgta/Psmc5/Rnf19b/Rnf19a/Psmb6/Gipc1/Psmd13/Chmp2b/Fbxo22/Psmb7/Ndfip2/Rad23b/Fbxw11/Nedd4l/Lonp1/Znrf1/Psmd2/Psmd11/Psmd6/Fbxo11/Trim26/Gclc/Agap3/Ube2n/Psmc3/Smurf1/Psma3/Psmc4/Nedd8/Ube2k/Ube2l3/Ascc3/Ddb1/Rps7/Plk3/Psma2/Csnk2a2/Clock/Dab2/Psmd10/Pdcl3/Fbxl15…
GO:0050679	positive regulation of epithelial cell proliferation	182	-0.476103	-1.33456	0.0495868	0.0495868	0.25331	824	tags=16%, list=6%, signal=15%	Glul/Cdh13/Sema5a/Fzd7/Ccl11/Kdm5b/Itga4/Egfr/Ccnd2/Ang/Stat3/Acvrl1/Ccl24/Hlx/Hspg2/Nr4a1/Notch2/Pik3cd/Vegfa/Notch1/Tcf7l2/Kdr/Col18a1/Cxcl12/Gas1/Cav1/Igf2/Egfl7/Aplnr
GO:0045907	positive regulation of vasoconstriction	32	-0.680435	-1.50616	0.0499139	0.0499139	0.254727	915	tags=25%, list=6%, signal=23%	Grk2/Tbxas1/Egfr/Ptgs1/Mgll/Ace/Cav1/Cd38

## Sheet: KEGG
ID	Description	setSize	enrichmentScore	NES	pvalue	p.adjust	qvalue	rank	leading_edge	core_enrichment
mmu04514	Cell adhesion molecules - Mus musculus (house mouse)	105	-0.775783	-2.04764	3.31773e-08	3.31773e-08	9.32455e-06	519	tags=26%, list=4%, signal=25%	16456/20345/15529/20970/14972/14964/50723/14991/15039/12483/15015/110557/12487/15018/19266/15040/14998/15896/18613/14969/14999/14960/14961/12490/69524/12741/12562
mmu05014	Amyotrophic lateral sclerosis - Mus musculus (house mouse)	287	0.529943	1.82037	1.17842e-07	1.17842e-07	1.65599e-05	2841	tags=43%, list=20%, signal=35%	21926/103468/70247/22142/14828/26397/269523/70316/18141/19173/227613/21353/17463/57296/237782/66997/26446/19184/12858/67264/18643/18226/20383/19175/23997/66218/68942/11465/11911/16573/19177/68342/53333/53379/53598/13665/230075/595136/12048/21762/69077/66413/66377/407790/56085/12028/11750/19182/68375/19167/23996/225887/12857/22272/19166/75406/225027/226977/66916/233908/103172/66594/72900/17992/191…
mmu01200	Carbon metabolism - Mus musculus (house mouse)	92	0.682685	2.02919	1.1876e-06	1.1876e-06	0.000111259	1586	tags=34%, list=11%, signal=30%	11676/18655/18746/11674/21991/18641/18648/13806/14433/13885/56421/110208/67078/11532/68133/14751/14719/21881/108037/66171/14661/73724/212032/17448/21351/108682/66646/12974/15275/14194/269951
mmu05320	Autoimmune thyroid disease - Mus musculus (house mouse)	30	-0.899937	-1.99346	2.54712e-06	2.54712e-06	0.000178969	397	tags=47%, list=3%, signal=45%	14972/14964/14991/15039/15015/110557/12487/15018/15040/14998/14969/14999/14960/14961
mmu01230	Biosynthesis of amino acids - Mus musculus (house mouse)	57	0.720628	1.98234	9.13771e-06	9.13771e-06	0.000513635	1586	tags=37%, list=11%, signal=33%	11676/18655/18746/11674/21991/18641/18648/11898/13806/14433/56421/12036/14719/21881/108037/21351/108682/66646/12974/109900/269951
mmu04141	Protein processing in endoplasmic reticulum - Mus musculus (house mouse)	151	0.573581	1.81755	1.14125e-05	1.14125e-05	0.000534584	2004	tags=36%, list=14%, signal=32%	15505/17872/12282/14828/22027/269523/71853/12334/12304/66357/103963/15519/20338/12317/17155/27054/15516/12017/12330/22213/11911/100037258/19359/67838/13665/67812/19089/14827/56085/66212/12028/140740/12018/109815/67075/56445/66256/56424/66105/18453/13200/18415/68292/20224/66245/66967/320011/12043/17156/15481/140499/14376/70361/13418/16430
mmu00010	Glycolysis / Gluconeogenesis - Mus musculus (house mouse)	46	0.759632	2.01426	1.47174e-05	1.47174e-05	0.000590908	615	tags=30%, list=4%, signal=29%	11676/18655/18746/11674/21991/18641/18648/16828/13806/14433/72157/56421/11532/14751
mmu05012	Parkinson disease - Mus musculus (house mouse)	215	0.523782	1.74842	2.10932e-05	2.10932e-05	0.000658962	1985	tags=37%, list=14%, signal=32%	70247/22142/14828/22166/70316/19173/227613/12315/57320/17463/57296/66997/26446/19184/12858/67264/19175/23997/66218/22213/11911/16573/19177/68342/13665/230075/595136/12048/14679/21762/69077/66413/66377/407790/12313/14977/12028/19182/68375/19167/23996/225887/11739/22195/12857/22272/19166/75406/66916/16439/66594/72900/17992/19172/66142/19170/26444/22059/106957/22334/407785/68198/66046/22333/75600/22…
mmu05022	Pathways of neurodegeneration - multiple diseases - Mus musculus (house mouse)	368	0.451899	1.59717	2.11016e-05	2.11016e-05	0.000658962	1802	tags=26%, list=13%, signal=23%	12569/21926/70247/22417/22142/14828/26397/269523/70316/12334/19173/227613/12315/21353/57320/15461/17463/57296/237782/66997/26446/19184/12858/67264/19175/23997/18033/66218/22213/68942/11911/16573/19177/68342/53333/53598/13665/230075/595136/12048/21762/69077/66413/66377/407790/12313/11938/18176/12028/19182/68375/12018/19167/23996/225887/212398/11739/22195/12857/22272/19166/13000/75406/226977/66916/…
mmu05016	Huntington disease - Mus musculus (house mouse)	240	0.501003	1.68899	3.03525e-05	3.03525e-05	0.000853065	3051	tags=44%, list=22%, signal=35%	170770/70247/22142/70316/19173/232910/227613/17463/19712/57296/66997/26446/19184/20656/12858/67264/19175/23997/66218/16573/19177/68342/53598/230075/595136/21762/69077/66413/231329/66377/407790/12028/19182/68375/19167/23996/225887/11739/12857/22272/74325/19166/75406/226977/66916/66594/72900/17992/19172/66142/19170/26444/22059/22334/407785/68198/11773/66046/22333/237336/227197/74781/20021/76559/223…
mmu05332	Graft-versus-host disease - Mus musculus (house mouse)	31	-0.855154	-1.89629	3.5184e-05	3.5184e-05	0.00089896	397	tags=45%, list=3%, signal=44%	14972/14964/14991/15039/15015/110557/12487/15018/15040/14998/14969/14999/14960/14961
mmu04940	Type I diabetes mellitus - Mus musculus (house mouse)	35	-0.837586	-1.87733	4.29862e-05	4.29862e-05	0.00100678	397	tags=40%, list=3%, signal=39%	14972/14964/14991/15039/15015/110557/12487/15018/15040/14998/14969/14999/14960/14961
mmu00190	Oxidative phosphorylation - Mus musculus (house mouse)	94	0.615722	1.8275	9.66486e-05	9.66486e-05	0.00208025	3035	tags=57%, list=22%, signal=45%	67895/70316/108664/12858/67264/66218/11964/68342/230075/595136/114143/11975/66377/407790/66335/68375/66144/225887/11973/12857/22272/66290/75406/66916/66594/72900/73834/76429/17992/66142/407785/68198/66046/227197/11966/104130/17993/11974/11984/68197/66052/70383/12861/11972/78330/69875/110323/12866/13063/66108/67273/66495/66414/54405
mmu05330	Allograft rejection - Mus musculus (house mouse)	32	-0.84472	-1.88355	0.000103623	0.000103623	0.00208025	397	tags=44%, list=3%, signal=43%	14972/14964/14991/15039/15015/110557/12487/15018/15040/14998/14969/14999/14960/14961
mmu05010	Alzheimer disease - Mus musculus (house mouse)	307	0.448416	1.55124	0.00012431	0.00012431	0.00232918	1866	tags=29%, list=13%, signal=25%	12569/21926/14433/70247/22417/22142/70316/12334/19173/227613/12315/11491/18708/15461/17463/57296/66997/26446/19184/12858/67264/19175/23997/18033/66218/208117/11911/16573/19177/68342/13665/230075/595136/21762/69077/66413/66377/407790/12313/11938/14977/18176/19182/68375/19167/23996/225887/212398/11739/12857/22272/19166/13000/18706/75406/66916/16439/66594/72900/17992/19172/56637/66142/19170/26444/16…
mmu04658	Th1 and Th2 cell differentiation - Mus musculus (house mouse)	78	-0.701572	-1.76178	0.000154294	0.000154294	0.0027103	737	tags=18%, list=5%, signal=17%	17132/20851/16190/15979/18129/14281/18128/20846/14998/14969/14999/14960/18131/14961
mmu04672	Intestinal immune network for IgA production - Mus musculus (house mouse)	35	-0.814831	-1.82632	0.000189168	0.000189168	0.00312743	1178	tags=37%, list=8%, signal=34%	21939/16168/16401/53859/50723/12767/12487/14998/20315/14969/14999/14960/14961
mmu00030	Pentose phosphate pathway - Mus musculus (house mouse)	24	0.79655	1.91604	0.000230211	0.000230211	0.00351357	1385	tags=50%, list=10%, signal=45%	11676/11674/18641/72157/56421/110208/232449/14751/21881/66171/21351/66646
mmu00100	Steroid biosynthesis - Mus musculus (house mouse)	17	0.861837	1.93233	0.000237528	0.000237528	0.00351357	601	tags=29%, list=4%, signal=28%	74754/20775/13121/66234/14137
mmu05150	Staphylococcus aureus infection - Mus musculus (house mouse)	39	-0.804303	-1.82724	0.000298117	0.000298117	0.00418933	531	tags=36%, list=4%, signal=35%	14131/20345/14962/14130/50909/19204/14129/246256/14998/14969/14999/14960/14961/50908
mmu05416	Viral myocarditis - Mus musculus (house mouse)	60	-0.740957	-1.77671	0.000343368	0.000343368	0.00459545	538	tags=38%, list=4%, signal=37%	24051/15007/21939/15042/12367/12370/16773/19354/14972/14964/14991/15039/15015/110557/12487/15018/15040/14998/14969/14999/14960/12389/14961
mmu05020	Prion disease - Mus musculus (house mouse)	216	0.476638	1.59055	0.000450184	0.000450184	0.00575115	1985	tags=35%, list=14%, signal=30%	21926/70247/22142/14828/70316/19173/227613/18708/17463/57296/66997/26446/19184/12858/67264/19175/23997/66218/11911/16573/19177/17972/68342/13665/230075/595136/21762/69077/66413/66377/407790/12028/19182/68375/19167/20867/23996/225887/11739/12857/22272/19166/13000/18706/75406/66916/16439/66594/72900/17992/19172/56637/66142/19170/26444/22334/407785/68198/66046/74769/13057/22333/227197/12390/22335/26…
mmu04657	IL-17 signaling pathway - Mus musculus (house mouse)	71	0.611933	1.76444	0.000474095	0.000474095	0.00579329	1382	tags=24%, list=10%, signal=22%	15945/20296/21926/14825/14283/17386/22027/20310/22031/15519/18033/15516/110809/18035/20306/330122/56637
mmu04081	Hormone signaling - Mus musculus (house mouse)	109	-0.645926	-1.71273	0.000568561	0.000568561	0.00665815	839	tags=14%, list=6%, signal=13%	11513/20502/21833/16337/72674/20848/20851/18707/51801/66066/53945/14600/54409/16002/11609
mmu00900	Terpenoid backbone biosynthesis - Mus musculus (house mouse)	20	0.801303	1.86695	0.00061877	0.00061877	0.00695628	1696	tags=50%, list=12%, signal=44%	110196/319554/192156/208715/68603/52014/57295/15357/17855/14272
mmu03008	Ribosome biogenesis in eukaryotes - Mus musculus (house mouse)	72	0.625918	1.80492	0.000913542	0.000913542	0.00960024	2805	tags=44%, list=20%, signal=36%	217109/67134/104444/98956/52530/19384/117109/102216272/67973/74097/27993/216987/105372/16418/72515/13000/74778/30877/69237/103573/224092/19782/245474/195434/213895/100019/213773/56488/14113/54364/101592/230737
mmu04670	Leukocyte transendothelial migration - Mus musculus (house mouse)	90	-0.661986	-1.70441	0.00092227	0.00092227	0.00960024	538	tags=14%, list=4%, signal=14%	19354/16456/18707/17907/22325/17390/74734/12767/20315/18613/69524/12741/12562
mmu03040	Spliceosome - Mus musculus (house mouse)	126	0.523487	1.63085	0.00104468	0.00104468	0.0104861	3145	tags=48%, list=23%, signal=38%	68981/50783/27366/68092/20383/20382/20637/110809/20641/66070/14105/56194/13204/225027/101943/233908/53607/68816/67959/74351/27756/212880/66125/27967/78651/20638/19655/229279/67332/22185/76936/20624/15481/319322/433702/68988/66492/28035/68479/108014/56070/69192/66585/67996/15382/107686/108121/60365/72047/17149/73666/20227/225160/66642/15381/231889/15387/51810/66921/67039/64340
mmu05168	Herpes simplex virus 1 infection - Mus musculus (house mouse)	160	-0.587927	-1.6392	0.00160926	0.00160926	0.0155961	973	tags=26%, list=7%, signal=25%	11783/11796/12370/21355/19106/15976/214763/17874/12010/16391/21937/15979/13163/24014/14972/18987/18707/14964/69550/21354/18854/545812/14991/15039/246728/170741/20846/20684/15015/110557/20847/15018/15040/14998/16149/14969/14999/23960/14960/54123/14961/246727
mmu04640	Hematopoietic cell lineage - Mus musculus (house mouse)	71	-0.646779	-1.58612	0.0027012	0.0027012	0.025306	719	tags=20%, list=5%, signal=19%	12978/12475/16190/12986/109700/12483/14129/14998/14969/14999/14960/12494/14961/12490
mmu03030	DNA replication - Mus musculus (house mouse)	35	0.689462	1.75141	0.00282981	0.00282981	0.0253275	1240	tags=37%, list=9%, signal=34%	17218/17216/17215/17220/18538/106344/17217/16881/17219/68209/59001/18968/67967
mmu04659	Th17 cell differentiation - Mus musculus (house mouse)	90	-0.635485	-1.63617	0.0030081	0.0030081	0.0253275	890	tags=19%, list=6%, signal=18%	16194/60504/21813/20848/20851/16190/15979/16195/19401/14281/50498/20846/14998/14969/14999/14960/14961
mmu04612	Antigen processing and presentation - Mus musculus (house mouse)	58	-0.701612	-1.67848	0.00303619	0.00303619	0.0253275	597	tags=34%, list=4%, signal=33%	13040/21355/12010/19186/14972/14964/21354/14991/15039/15015/110557/15018/15040/14998/16149/14969/14999/14960/14961/12265
mmu00051	Fructose and mannose metabolism - Mus musculus (house mouse)	29	0.731877	1.79861	0.00306396	0.00306396	0.0253275	279	tags=21%, list=2%, signal=20%	11676/11674/21991/18641/14187/56421
mmu05145	Toxoplasmosis - Mus musculus (house mouse)	99	-0.617331	-1.61503	0.00341823	0.00341823	0.0274487	1178	tags=27%, list=8%, signal=25%	21939/226519/12367/16775/11796/12370/16154/16773/16155/20848/17874/21937/16777/15979/16145/54396/17087/12774/20846/15944/14998/14969/14999/14960/14961/16776/12265
mmu05322	Systemic lupus erythematosus - Mus musculus (house mouse)	38	-0.738372	-1.66878	0.00376685	0.00376685	0.0294078	531	tags=29%, list=4%, signal=28%	14131/50909/14129/12487/246256/14998/14969/14999/14960/14961/50908
mmu04066	HIF-1 signaling pathway - Mus musculus (house mouse)	99	0.516724	1.54693	0.00431324	0.00431324	0.0327634	674	tags=19%, list=5%, signal=18%	11676/13614/18655/11674/18641/228026/16828/13806/14433/18787/112405/20525/15368/56421/18708/21857/18033/15251/13685
mmu04964	Proximal tubule bicarbonate reclamation - Mus musculus (house mouse)	18	-0.819352	-1.66665	0.0050747	0.0050747	0.0375331	320	tags=22%, list=2%, signal=22%	74551/232975/98660/11826
mmu05135	Yersinia infection - Mus musculus (house mouse)	128	0.462597	1.43736	0.00750001	0.00750001	0.0540486	1912	tags=23%, list=14%, signal=20%	15977/20296/21926/108100/16402/26397/18708/67771/18033/11465/140580/16412/216799/16153/20112/18035/170758/22324/54126/11867/18706/56637/76709/19878/74769/66824/12540/57257/56378/19877
mmu05017	Spinocerebellar ataxia - Mus musculus (house mouse)	122	0.481004	1.49346	0.00772634	0.00772634	0.0542877	2846	tags=47%, list=20%, signal=37%	70247/67134/19173/18708/17463/57296/66997/26446/19184/19175/23997/19664/19177/21762/69077/66413/11938/19182/19167/23996/11739/114896/19166/18706/16439/229906/19172/19170/26444/22334/74769/22333/237336/74781/81601/76559/22335/26445/26443/19179/69597/26441/26440/12286/67089/22433/67151/22030/59029/56717/19181/11651/22123/51897/19185/13063/110616
mmu05321	Inflammatory bowel disease - Mus musculus (house mouse)	49	-0.675788	-1.58729	0.00793578	0.00793578	0.0543993	890	tags=22%, list=6%, signal=21%	60504/17132/20848/16190/15979/20846/14998/14969/14999/14960/14961
mmu04721	Synaptic vesicle cycle - Mus musculus (house mouse)	47	0.602421	1.60232	0.00844252	0.00844252	0.056495	2593	tags=45%, list=19%, signal=36%	20908/232910/108664/11964/114143/11975/66335/13430/66144/11973/74325/66290/73834/11773/11966/12286/11974/11984/13852/108124/11972
mmu04330	Notch signaling pathway - Mus musculus (house mouse)	59	-0.661317	-1.58201	0.00910848	0.00910848	0.059534	1498	tags=31%, list=11%, signal=27%	66354/18519/16396/17305/270118/66340/207521/328572/66935/68318/18129/18128/209200/16848/80904/15205/18131/56198
mmu05165	Human papillomavirus infection - Mus musculus (house mouse)	271	-0.48888	-1.43037	0.00944547	0.00944547	0.0603335	1156	tags=19%, list=8%, signal=18%	270118/226519/14369/19054/15042/16401/19303/12367/93742/16775/12370/13649/19106/15976/12444/16773/328572/208647/16391/21937/16777/12575/12576/12834/14972/18129/18707/14964/22339/18128/21416/16848/14991/15039/15205/109700/21825/16362/20846/23962/15015/110557/20847/18596/15018/15040/12826/12827/18131/56198/81877/16776
mmu04080	Neuroactive ligand-receptor interaction - Mus musculus (house mouse)	103	-0.600604	-1.57904	0.00993554	0.00993554	0.0620536	1228	tags=17%, list=9%, signal=16%	14745/78134/13617/54598/12267/140795/14739/72075/233571/21833/18438/67168/74191/19204/64095/14600/23796/11609
mmu05134	Legionellosis - Mus musculus (house mouse)	57	0.572967	1.57615	0.0111655	0.0111655	0.0682193	1639	tags=32%, list=12%, signal=28%	12176/21926/14825/16409/20310/269523/18034/15510/18033/12266/11841/18035/67160/330122/20333/20224/24088/66824
mmu04510	Focal adhesion - Mus musculus (house mouse)	179	-0.523812	-1.47289	0.0143199	0.0143199	0.0856306	1146	tags=16%, list=8%, signal=15%	226519/64099/16401/19303/16775/22793/11796/13649/12444/16773/16777/19354/12834/18707/22339/17907/22325/16542/109700/21825/18596/18595/107589/12826/12827/14254/12389/81877/16776
mmu04974	Protein digestion and absorption - Mus musculus (house mouse)	63	-0.635436	-1.54369	0.0153658	0.0153658	0.0899707	806	tags=16%, list=6%, signal=15%	12818/215335/12834/53867/232975/12822/12819/12826/12827/98660
mmu04614	Renin-angiotensin system - Mus musculus (house mouse)	14	-0.815851	-1.59387	0.0163285	0.0163285	0.0936566	98	tags=21%, list=1%, signal=21%	72461/11421/11609
mmu03050	Proteasome - Mus musculus (house mouse)	45	0.613533	1.62232	0.017824	0.017824	0.10019	2780	tags=71%, list=20%, signal=57%	70247/19173/17463/57296/66997/26446/19184/19175/23997/19177/21762/69077/66413/19182/19167/23996/19166/19172/19170/26444/26445/26443/19179/26441/26440/67089/67151/59029/19181/66537/22123/19185
mmu00052	Galactose metabolism - Mus musculus (house mouse)	23	0.687957	1.64018	0.018191	0.018191	0.100248	2307	tags=52%, list=17%, signal=44%	18641/14187/72157/56421/216558/14635/212032/15275/74246/11605/66681/319625
mmu05200	Pathways in cancer - Mus musculus (house mouse)	432	-0.434793	-1.31008	0.0191224	0.0191224	0.103354	1877	tags=23%, list=13%, signal=21%	16451/23871/12984/15234/11652/14696/319757/16476/22411/18805/76551/27015/11863/12125/21809/13544/16974/14863/54354/16779/12314/19015/17311/26420/18747/14862/17873/78798/27057/14745/19016/78134/226519/13617/14369/14256/16168/16194/12367/14673/16775/56289/11783/12606/11796/17979/12370/14870/21813/11513/58231/13649/18712/15976/12444/16773/12978/328572/17187/14872/12395/20848/240168/16777/20851/19354…
mmu04668	TNF signaling pathway - Mus musculus (house mouse)	113	0.469642	1.43238	0.019875	0.019875	0.105395	683	tags=14%, list=5%, signal=14%	15977/15945/13614/20296/21926/14825/12633/26397/20310/22031/11491/18708/74006/18033/11911/217344
mmu05132	Salmonella infection - Mus musculus (house mouse)	229	0.38646	1.30266	0.0213878	0.0213878	0.109908	1649	tags=26%, list=12%, signal=23%	20194/21926/14433/22142/56044/22027/17869/26397/12306/22166/105504/227613/17113/68097/15461/16648/15519/170760/56455/18643/67771/18033/15516/71999/11465/67166/140580/16573/192656/11841/53598/66395/216799/16646/56532/12028/20430/18035/13430/12018/19158/234686/192176/19349/20130/67068/11867/18706/226977/76884/235661/76709/19878/24088/74769/14082/66824/12043/27050
mmu01240	Biosynthesis of cofactors - Mus musculus (house mouse)	116	0.459005	1.40629	0.0216064	0.0216064	0.109908	2556	tags=28%, list=18%, signal=23%	17768/14630/18102/110006/216558/18103/12850/12036/102216272/665563/211347/14629/108037/14528/108156/15288/20751/270685/227683/13361/11637/22247/29858/66588/14854/71743/17252/54369/13382/69568/70383/11564
mmu04922	Glucagon signaling pathway - Mus musculus (house mouse)	83	0.502643	1.47344	0.0218993	0.0218993	0.109908	816	tags=14%, list=6%, signal=14%	18746/18641/18648/16828/20525/93759/56421/12315/14936/19309/11911/12313
mmu04714	Thermogenesis - Mus musculus (house mouse)	182	0.40447	1.31282	0.0228251	0.0228251	0.112545	3337	tags=40%, list=24%, signal=31%	26397/70316/15461/14081/12858/67264/66218/11465/68342/230075/595136/20586/66377/407790/56456/52469/20112/18176/68375/225887/19744/12857/22272/75406/66916/66594/72900/17992/66142/407785/68198/66046/75597/231430/104111/227197/72508/104130/68493/17993/16653/73694/74370/20587/68197/66052/20104/56717/110651/70383/12861/78330/69875/110323/12866/433256/66108/99982/67273/68033/66495/66414/54405/66379/115…
mmu04145	Phagosome - Mus musculus (house mouse)	129	-0.527394	-1.43506	0.0250578	0.0250578	0.12016	857	tags=19%, list=6%, signal=18%	13040/21355/19344/12475/20778/14131/14972/14964/14130/21354/50909/14991/15039/21825/14129/15015/110557/15018/246256/15040/14998/14969/14999/14960/14961
mmu03060	Protein export - Mus musculus (house mouse)	29	0.651154	1.60023	0.0252245	0.0252245	0.12016	1989	tags=48%, list=14%, signal=41%	14828/27643/66286/52551/27058/20813/76687/66212/140740/66624/66320/66384/66661/224727
mmu04137	Mitophagy - animal - Mus musculus (house mouse)	95	0.473428	1.40747	0.0264435	0.0264435	0.123867	2485	tags=35%, list=18%, signal=29%	12176/17684/269523/15461/11911/15251/53333/13665/12048/18176/13555/75788/28185/52440/19349/20130/13000/68653/22059/67443/67952/66687/17827/14479/59040/68350/78294/16653/19345/66437/22030/271457/12034
mmu03013	Nucleocytoplasmic transport - Mus musculus (house mouse)	99	0.459152	1.37457	0.02692	0.02692	0.124032	3048	tags=32%, list=22%, signal=25%	103468/19384/18141/226747/16648/68092/18226/16650/16646/386612/19387/73192/108989/75751/19386/70572/103573/433702/68134/71805/72787/16211/66069/66679/56488/60365/17149/73666/225160/226432/230673/445007
mmu05417	Lipid and atherosclerosis - Mus musculus (house mouse)	179	0.411111	1.32903	0.0296284	0.0296284	0.134309	1645	tags=24%, list=12%, signal=21%	15977/20296/21926/14825/14828/22027/26397/20310/16835/22031/12315/18708/21353/15461/15519/15510/20656/15512/18033/15516/12491/15525/11911/17972/13665/12048/216799/12313/18176/12028/18035/22324/18706/330122/56637/22059/19878/24088/74769/13057/66824/75600/12043
mmu05230	Central carbon metabolism in cancer - Mus musculus (house mouse)	62	0.543592	1.51622	0.0320303	0.0320303	0.140679	1586	tags=32%, list=11%, signal=29%	80879/18746/18641/18648/228026/16828/20525/17869/56421/18708/15461/15251/18176/20539/18706/212032/22059/15275/74769/269951
mmu00500	Starch and sucrose metabolism - Mus musculus (house mouse)	20	0.669018	1.55874	0.0320347	0.0320347	0.140679	1522	tags=45%, list=11%, signal=40%	72157/216558/14936/19309/14751/70974/74185/212032/15275
mmu04512	ECM-receptor interaction - Mus musculus (house mouse)	66	-0.606117	-1.47953	0.033384	0.033384	0.144349	1146	tags=21%, list=8%, signal=20%	226519/16401/16775/16423/16773/16777/12834/15530/109700/21825/12826/12827/81877/16776
mmu04020	Calcium signaling pathway - Mus musculus (house mouse)	174	-0.488409	-1.36785	0.0348525	0.0348525	0.148415	1142	tags=21%, list=8%, signal=20%	18795/20866/104110/16438/19058/68961/21425/20541/252972/105675/15234/233979/74055/12314/18747/18439/18018/13617/94178/227541/65973/11513/13649/18438/109305/269999/22339/19204/16542/21925/12767/18596/18595/107589/11937/14254/12494
mmu04622	RIG-I-like receptor signaling pathway - Mus musculus (house mouse)	51	0.546789	1.49228	0.035472	0.035472	0.148798	546	tags=16%, list=4%, signal=15%	15977/15945/21926/71586/100038882/22031/21353/18033
mmu04110	Cell cycle - Mus musculus (house mouse)	150	0.416721	1.32061	0.0422324	0.0422324	0.170948	2208	tags=26%, list=16%, signal=22%	13197/17218/17216/17246/17869/17215/17220/18538/17217/225849/18393/22629/12571/12443/17219/67177/22627/12442/13555/13006/75430/55948/56637/54401/22059/56150/52717/105988/22390/23882/218914/73699/51792/77805/229776/56317/26428/66671/22630
mmu05140	Leishmaniasis - Mus musculus (house mouse)	67	-0.598543	-1.46472	0.0425197	0.0425197	0.170948	617	tags=18%, list=4%, signal=17%	17874/14131/15979/14281/20846/14129/246256/14998/14969/14999/14960/14961
mmu05142	Chagas disease - Mus musculus (house mouse)	91	0.46028	1.36257	0.0425769	0.0425769	0.170948	970	tags=14%, list=7%, signal=13%	15977/20296/21926/18787/12633/18708/12317/18033/12266/14679/16153/18035/71978
mmu04966	Collecting duct acid secretion - Mus musculus (house mouse)	18	0.677628	1.5338	0.0456707	0.0456707	0.178827	3006	tags=67%, list=22%, signal=52%	11964/11975/66335/66144/11973/66290/73834/11966/11974/11984/11972/20499
mmu01250	Biosynthesis of nucleotide sugars - Mus musculus (house mouse)	35	0.579018	1.47086	0.0461779	0.0461779	0.178827	3506	tags=57%, list=25%, signal=43%	72157/216558/14751/227620/14635/94181/212032/15275/74246/218138/29858/14583/66681/109785/56174/331026/15277/22235/54342/14584
mmu05202	Transcriptional misregulation in cancer - Mus musculus (house mouse)	151	-0.498935	-1.37908	0.0464481	0.0464481	0.178827	1418	tags=26%, list=10%, signal=24%	70439/16009/17873/12151/214162/22290/19016/21939/53618/16909/12606/11796/21813/12444/15242/14247/17132/12978/17187/17260/12395/12475/18791/12053/12575/12576/12608/18514/13198/19401/17095/16480/16599/18854/21417/67603/14129/15446/21912/14254
