# Supplementary material for: Single-Cell Transcriptomics Highlights Macrophage-Driven Regulation of EndMT and Repair in Injured Muscle
Source: Research Square preprint supplement (doi:10.21203/rs.3.rs-6288736/v1), 2025-04-24
Supplement: Supplementary file 2 [file 84d192e2cf5fca5039d67950.xlsx]

## Sheet: Sheet1
gene	baseMean	log2FoldChange	lfcSE	pvalue	padj
Timp1	1374.86	5.09464	0.312881	3.55565e-60	4.79622e-56
Tagln	1873.9	3.40076	0.229044	7.12823e-51	4.80764e-47
Ltbp2	253.71	4.84633	0.325379	8.2772e-50	3.7217e-46
Ecrg4	565.473	5.16188	0.352113	1.27157e-48	4.28805e-45
Ddah1	463.47	3.07598	0.248545	3.34918e-36	9.03542e-33
Ccl2	1039.23	3.59068	0.30604	7.08933e-33	1.5938e-29
Sfrp1	274.999	4.14125	0.34971	1.19249e-32	2.29794e-29
Olfml3	339.448	3.65236	0.312148	2.70382e-32	4.55898e-29
Col8a1	1259.96	3.97835	0.346717	1.74217e-31	2.61112e-28
Oaf	523.1	3.27162	0.29092	2.98989e-30	4.03306e-27
Lox	980.559	3.86156	0.345204	5.46032e-30	6.69584e-27
Pcolce	725.382	2.83537	0.258076	4.61246e-29	5.18479e-26
Selenop	689.85	-2.32853	0.212808	7.77222e-29	8.06458e-26
Thbs4	2228.97	3.8293	0.356008	3.65874e-28	3.5252e-25
Tspan7	295.622	-3.54359	0.334353	1.2388e-27	1.11401e-24
Lgals1	5188.4	2.66265	0.251507	3.4521e-27	2.91033e-24
Pcdh17	233.702	-3.08784	0.292737	4.29883e-27	3.41099e-24
Csrp2	1668.15	3.41517	0.32525	7.8444e-27	5.87851e-24
Rcn3	657.159	3.46241	0.32992	1.07265e-26	7.23447e-24
Snhg18	305.258	2.96526	0.281817	1.02224e-26	7.23447e-24
Svep1	173.19	3.69311	0.348981	1.19995e-26	7.70767e-24
Aplnr	348.867	-3.39703	0.331777	6.85618e-26	4.20377e-23
Fkbp11	385.43	3.55614	0.344159	7.69996e-26	4.51586e-23
Efemp2	240.561	3.18016	0.308058	8.53958e-26	4.7996e-23
Ccdc80	761.147	3.39262	0.33029	1.05136e-25	5.6727e-23
Iigp1	253.789	-3.23572	0.318138	1.28599e-25	6.67181e-23
Fbn1	981.723	2.85298	0.280808	3.17733e-25	1.58737e-22
Ccl7	311.629	3.56501	0.350355	4.09504e-25	1.97278e-22
Col8a2	74.5945	4.13906	0.401985	4.64368e-25	2.15995e-22
Fst	78.7852	3.96732	0.393107	2.53471e-24	1.13969e-21
Cpxm2	96.3817	4.19213	0.416464	6.49987e-24	2.82828e-21
Clec11a	106.253	4.10979	0.409349	7.19153e-24	3.03146e-21
Ifit1	83.8511	-4.28712	0.432791	7.59504e-24	3.10453e-21
Mlec	277.044	2.34862	0.240495	2.04836e-23	8.12655e-21
Mfap4	790.232	3.53708	0.363826	2.53906e-23	9.78553e-21
Thbs1	815.331	2.9802	0.308601	4.59908e-23	1.72325e-20
Selenom	1229.69	2.04957	0.212018	5.33359e-23	1.94445e-20
Cd93	1105.92	-2.8335	0.296057	7.71487e-23	2.73858e-20
Slc16a3	71.4048	3.52968	0.367136	8.25301e-23	2.85448e-20
Kdelr3	235.181	3.03153	0.316431	1.35609e-22	4.57307e-20
St8sia4	105.26	-3.38	0.3579	2.15568e-22	7.09217e-20
P4ha2	180.49	2.48682	0.262758	3.69766e-22	1.18757e-19
F11r	227.199	-2.96194	0.316787	4.92746e-22	1.45063e-19
Nrarp	96.3307	-3.54712	0.379021	4.78336e-22	1.45063e-19
Loxl3	155.157	3.23896	0.341509	4.94691e-22	1.45063e-19
Srpx2	228.722	3.52283	0.3714	4.87761e-22	1.45063e-19
Serpinf1	996.283	3.64129	0.388188	5.86046e-22	1.68195e-19
P3h1	159.128	2.95654	0.31272	6.05033e-22	1.70027e-19
Cd200	513.954	-2.81872	0.302202	7.33051e-22	2.01799e-19
Cxcl1	1068.34	2.79197	0.298798	9.05704e-22	2.44341e-19
Gimap4	157.929	-3.10146	0.333747	9.25515e-22	2.4479e-19
Col11a1	213.004	3.53993	0.37642	1.09682e-21	2.8452e-19
P3h3	180.954	2.65318	0.283336	1.15963e-21	2.95136e-19
Ckap4	714.949	2.29335	0.245825	1.31963e-21	3.29638e-19
Tmem97	93.7676	2.91865	0.315203	1.34961e-21	3.30999e-19
Copz2	356.583	2.07935	0.224154	2.14782e-21	5.0828e-19
Gpx8	255.824	2.83365	0.305104	2.13189e-21	5.0828e-19
Cd38	139.936	-3.17563	0.345675	2.19947e-21	5.11528e-19
Sfrp2	229.98	3.73186	0.402506	4.06204e-21	9.28692e-19
Manf	923.28	2.08209	0.226167	4.15148e-21	9.33323e-19
Galnt17	96.1867	3.91477	0.421585	8.33214e-21	1.8425e-18
Acta2	1034.55	2.80184	0.307804	8.95203e-21	1.94764e-18
Serpine1	321.576	3.13361	0.344383	9.81058e-21	2.10055e-18
Txndc5	403.33	2.54581	0.279532	1.06884e-20	2.25275e-18
Vkorc1	425.508	2.19812	0.241296	1.08886e-20	2.25964e-18
Prdx5	672.145	1.93809	0.213277	1.41055e-20	2.88286e-18
Nnmt	181.29	3.01253	0.331979	2.11478e-20	4.25765e-18
Gbp7	134.882	-2.69919	0.301547	2.58697e-20	5.13171e-18
Lsp1	786.86	3.31522	0.369981	3.10665e-20	6.07327e-18
Prrx2	138.682	3.69468	0.407618	3.29075e-20	6.34127e-18
Sox7	129.577	-2.84848	0.319728	3.58807e-20	6.81683e-18
Srm	240.229	2.13541	0.240497	7.31135e-20	1.36976e-17
Sox18	286.28	-3.09079	0.350991	8.20449e-20	1.51603e-17
Cdh13	286.169	-2.64299	0.300635	1.04913e-19	1.91239e-17
Dach1	91.9319	-3.27315	0.37277	1.07537e-19	1.93409e-17
Scarb1	297.306	-2.87475	0.327943	1.14738e-19	2.03644e-17
Ehd4	255.972	-2.16964	0.246491	1.44565e-19	2.53251e-17
Emcn	480.297	-2.85948	0.327328	1.74033e-19	3.00965e-17
Glipr2	119.444	2.68881	0.305479	2.13581e-19	3.64682e-17
Rbp1	574.652	3.22495	0.37026	3.23361e-19	5.45226e-17
Sod3	86.6695	3.76919	0.425918	4.26972e-19	7.1104e-17
Itgbl1	78.5789	3.73888	0.42478	6.42782e-19	1.05738e-16
Pclaf	262.486	2.49997	0.288884	7.00384e-19	1.13825e-16
H2-T23	196.672	-2.73225	0.318987	7.43576e-19	1.19406e-16
Mif	977.448	1.9305	0.223806	8.06263e-19	1.26461e-16
Pdgfb	305.858	-2.44746	0.28545	7.98117e-19	1.26461e-16
Ltbp4	504.104	-2.25016	0.262855	1.06907e-18	1.65756e-16
Twist1	112.755	3.30506	0.381926	1.32535e-18	2.03155e-16
Angptl4	174.428	2.2572	0.265438	1.60098e-18	2.40325e-16
Anxa1	455.532	2.07671	0.242775	1.60347e-18	2.40325e-16
Gimap1	141.634	-2.82206	0.333542	1.83333e-18	2.71756e-16
Smagp	109.072	-3.04073	0.359966	1.87054e-18	2.74258e-16
Pdgfrl	242.561	3.00192	0.35163	1.94378e-18	2.81932e-16
Mcam	234.065	-2.51715	0.297528	2.31374e-18	3.32022e-16
Esam	570.749	-2.72993	0.323627	2.46927e-18	3.50611e-16
Ssr4	1123.55	1.82863	0.214807	2.5115e-18	3.52892e-16
Ostc	706.089	1.81582	0.213263	2.54452e-18	3.53846e-16
Tln2	221.256	2.38719	0.280793	2.73145e-18	3.75965e-16
Nupr1	149.822	2.66378	0.31603	5.8638e-18	7.98957e-16
Tmem88	238.46	-2.92193	0.352485	6.80778e-18	9.18302e-16
Clspn	108.106	2.87515	0.344071	7.04835e-18	9.41339e-16
AW112010	293.711	-2.54557	0.306765	7.78725e-18	1.02983e-15
Loxl2	229.249	2.56586	0.307184	8.96761e-18	1.17441e-15
Gpr153	74.9484	3.38101	0.402123	9.92199e-18	1.2869e-15
Fli1	207.788	-2.86575	0.348064	1.11119e-17	1.41758e-15
Mmrn2	257.318	-2.78095	0.337497	1.11397e-17	1.41758e-15
Srgn	494.779	-2.38254	0.28827	1.19423e-17	1.50552e-15
Mrc2	256.241	3.15239	0.378854	1.25551e-17	1.56811e-15
Has1	103.437	3.24	0.387693	1.47688e-17	1.81382e-15
Trem2	91.3059	-2.85373	0.345133	1.47914e-17	1.81382e-15
Kdr	630.986	-2.88646	0.351737	1.55575e-17	1.89058e-15
Aebp1	554.175	2.6922	0.326239	1.7245e-17	2.07695e-15
Phgdh	78.4532	3.15215	0.38049	1.79618e-17	2.14413e-15
Dll4	83.8024	-3.05869	0.372999	1.86024e-17	2.20112e-15
Col6a2	703.933	2.68693	0.326284	1.90605e-17	2.23571e-15
Emilin1	293.781	2.24809	0.271981	1.93963e-17	2.25549e-15
Rsad2	128.204	-3.25664	0.400024	2.01217e-17	2.31984e-15
Abca1	206.38	-2.41934	0.295385	2.18446e-17	2.49714e-15
Cd248	142.93	2.87062	0.348821	2.78666e-17	3.15876e-15
Rrm2	89.078	2.63922	0.321381	2.98717e-17	3.3307e-15
Ednrb	83.8691	-3.03467	0.373615	2.98772e-17	3.3307e-15
Cdh5	1637.67	-2.83168	0.3482	3.18906e-17	3.52601e-15
Abcb1a	65.6415	-4.03367	0.499319	3.31674e-17	3.63736e-15
Cks2	234.597	2.00746	0.244708	3.35974e-17	3.6548e-15
Tspan12	88.556	-2.77935	0.342367	3.70136e-17	3.99421e-15
Fkbp10	309.919	2.01767	0.246639	3.78983e-17	4.03348e-15
Dap	380.363	2.31924	0.283562	3.79755e-17	4.03348e-15
Parp14	114.866	-2.548	0.313308	3.86516e-17	4.07322e-15
H2-Q7	181.478	-2.45033	0.301341	3.9235e-17	4.10264e-15
Rcn1	311.466	1.966	0.240236	4.03331e-17	4.18502e-15
Tubb3	39.8131	5.1682	0.624656	4.22775e-17	4.35329e-15
Tpm2	535.686	2.43046	0.298928	4.88402e-17	4.99095e-15
Dnajc25	133.524	2.29682	0.281722	4.93979e-17	5.00998e-15
Efna1	90.882	-2.96949	0.367086	5.28509e-17	5.32019e-15
Plxnd1	411.398	-2.12201	0.262238	5.94788e-17	5.94303e-15
Ccnd1	600.862	-2.36037	0.292651	6.43837e-17	6.38582e-15
Ldb2	80.545	-2.73513	0.338992	6.53503e-17	6.43438e-15
Igf2	118.678	-2.32	0.286725	7.07078e-17	6.86171e-15
Arsi	45.8517	3.36183	0.416995	7.02087e-17	6.86171e-15
Fndc1	522.866	3.01673	0.374602	8.67693e-17	8.36023e-15
Gng10	241.06	1.95145	0.241466	9.55622e-17	9.14212e-15
Kcnk1	38.0026	5.18266	0.62372	9.87845e-17	9.38383e-15
Cav1	1842.67	-2.61868	0.327284	1.00031e-16	9.43579e-15
Basp1	346.472	2.77108	0.344391	1.00857e-16	9.44767e-15
Dclk1	191.307	2.92156	0.361932	1.06791e-16	9.93449e-15
Bcat1	49.3923	3.88379	0.474972	1.26554e-16	1.16923e-14
Tie1	262.485	-2.50991	0.315563	1.37231e-16	1.25925e-14
Epas1	430.622	-2.67674	0.3375	1.55756e-16	1.41959e-14
Crim1	224.75	-2.46212	0.310285	1.62542e-16	1.4715e-14
Pde2a	121.698	-2.48987	0.313267	1.75514e-16	1.57834e-14
Rassf3	142.863	-2.43886	0.307758	1.78659e-16	1.59598e-14
Ccn5	47.8982	4.18994	0.53649	1.88133e-16	1.66956e-14
Rtp4	79.7598	-2.92986	0.369208	1.98486e-16	1.74992e-14
Sept4	191.829	-2.74856	0.348179	2.15577e-16	1.88826e-14
Siva1	271.291	1.87697	0.235196	2.22147e-16	1.93326e-14
Gja4	92.6947	-2.95849	0.374754	2.39003e-16	2.06661e-14
Comp	77.0726	3.59836	0.446533	2.46574e-16	2.1185e-14
Dio3	45.7971	6.0385	0.74444	2.84609e-16	2.42981e-14
Itga6	417.507	-2.68287	0.341759	2.92967e-16	2.48542e-14
Fmod	151.897	3.16027	0.397433	3.13699e-16	2.64468e-14
Hspa5	1818.41	1.56369	0.196646	3.44004e-16	2.88215e-14
Ptp4a3	236.937	-2.54079	0.323991	3.48711e-16	2.90356e-14
Selenos	385.372	1.85602	0.234883	4.29156e-16	3.55146e-14
Prcp	193.769	-2.04399	0.259404	4.33065e-16	3.56196e-14
Hdlbp	725.496	1.64326	0.207991	4.86911e-16	3.98057e-14
Pmepa1	528.519	1.82165	0.231052	4.99733e-16	4.06078e-14
Tpi1	438.92	1.78371	0.226655	5.10461e-16	4.12312e-14
Ablim1	210.894	-2.50956	0.322715	5.70706e-16	4.5823e-14
Arhgdig	36.1564	4.95978	0.614098	6.07061e-16	4.84535e-14
Tm6sf1	74.6858	-2.7906	0.359083	6.26188e-16	4.96862e-14
Vasn	165.153	2.65362	0.338017	6.45335e-16	5.0906e-14
P4hb	1162.07	1.71191	0.217937	6.62071e-16	5.19225e-14
Apoe	3449.99	-2.37905	0.305836	6.82898e-16	5.32463e-14
P4ha3	80.0509	3.43049	0.434096	7.71638e-16	5.98197e-14
Nt5dc2	173.715	2.26688	0.292017	8.75326e-16	6.74701e-14
Pgk1	498.826	1.69241	0.217333	1.10286e-15	8.45257e-14
Il11ra1	221.335	2.34387	0.302496	1.11586e-15	8.50385e-14
Mdk	251.909	2.51295	0.324336	1.23981e-15	9.39537e-14
Fam167b	96.6614	-2.75572	0.357819	1.27432e-15	9.57142e-14
2200002D01Rik	119.177	-3.13058	0.410321	1.27723e-15	9.57142e-14
Serinc3	487.732	-1.69661	0.218614	1.322e-15	9.85217e-14
Adam12	189.144	2.31013	0.298015	1.3687e-15	1.01442e-13
Aplp2	668.513	-1.86155	0.241081	1.47525e-15	1.08741e-13
C1qtnf9	347.286	-2.9928	0.392762	1.52625e-15	1.11889e-13
Ptx3	119.383	3.4072	0.439983	1.76397e-15	1.28617e-13
Ccn3	140.22	2.80297	0.364239	1.8257e-15	1.32402e-13
Nme2	3943.46	1.63352	0.211387	1.8896e-15	1.36303e-13
Dok1	80.3048	2.58394	0.335345	2.0947e-15	1.50295e-13
Plod2	302.619	2.82194	0.368179	2.13462e-15	1.52348e-13
C130074G19Rik	198.764	-2.95947	0.391816	2.41915e-15	1.71747e-13
Adam23	58.0652	3.6564	0.468911	2.58861e-15	1.82815e-13
Pgam1	480.628	1.62636	0.211631	2.60679e-15	1.83141e-13
Cyp51	63.5462	2.83326	0.37137	2.90665e-15	2.03149e-13
Ass1	106.342	2.46054	0.325787	3.19856e-15	2.21945e-13
Pcdh1	116.258	-2.66873	0.354019	3.20848e-15	2.21945e-13
Cpe	71.2077	-3.12887	0.413642	3.41989e-15	2.35361e-13
Irgm1	76.0298	-2.58258	0.341139	3.76892e-15	2.58066e-13
Tnfaip6	241.857	2.74005	0.361308	3.85084e-15	2.62343e-13
Hoxd3os1	51.538	-3.41088	0.450376	3.90667e-15	2.63935e-13
Cbfa2t3	91.7448	-2.7484	0.365466	3.91334e-15	2.63935e-13
Fstl1	1916.09	2.13866	0.282225	4.21911e-15	2.83142e-13
Stab1	104.965	-2.24648	0.29695	4.27963e-15	2.85782e-13
Arhgap18	143.272	-2.49556	0.331428	4.32698e-15	2.8752e-13
Ehd2	669.193	-2.41155	0.320266	4.39289e-15	2.90469e-13
Cldn5	494.044	-2.08903	0.276622	4.70902e-15	3.09853e-13
Abcg1	103.09	-2.37986	0.315938	4.88884e-15	3.20124e-13
Plpp3	511.789	-1.7698	0.233997	5.42514e-15	3.53525e-13
Tmed3	601.388	1.99255	0.26368	5.63928e-15	3.65713e-13
Ssr2	609.3	1.7924	0.237023	5.69834e-15	3.67774e-13
Fbn2	106.826	3.13556	0.412908	6.09759e-15	3.91668e-13
Bcl6b	102.976	-2.42493	0.324619	6.59462e-15	4.21587e-13
Ets2	275.408	-1.89962	0.252488	6.9519e-15	4.42331e-13
Plvap	344.176	-2.55135	0.341924	7.66291e-15	4.85282e-13
Rbp4	33.907	4.43809	0.578634	8.39312e-15	5.29041e-13
Fhl2	89.5526	3.15558	0.417269	8.92147e-15	5.59566e-13
Tubb2b	212.23	2.22466	0.297044	8.96036e-15	5.59566e-13
Arhgef15	131.516	-2.74746	0.372134	9.35592e-15	5.81576e-13
Adgrg1	159.123	-2.72401	0.369045	9.97343e-15	6.17118e-13
Mef2c	307.63	-2.10954	0.284218	1.18673e-14	7.30949e-13
Scn7a	101.242	2.99306	0.399367	1.25742e-14	7.70968e-13
Pmm1	104.454	2.12211	0.284977	1.31257e-14	8.01143e-13
Cks1b	172.109	1.95676	0.262281	1.37586e-14	8.35988e-13
Gda	86.6706	-2.87704	0.3922	1.38774e-14	8.39427e-13
Gm12002	59.2349	-3.69285	0.505145	1.42651e-14	8.59025e-13
Tmem252	85.5948	-2.80397	0.379851	1.43614e-14	8.60982e-13
Pdlim2	214.006	1.90425	0.256213	1.61966e-14	9.62505e-13
Camk2n2	40.7883	3.16496	0.429772	1.61975e-14	9.62505e-13
Egfl7	1179.59	-2.43265	0.330622	1.65531e-14	9.75043e-13
Pltp	210.023	-2.6071	0.355655	1.65226e-14	9.75043e-13
Thy1	189.838	2.55705	0.344884	1.68521e-14	9.8834e-13
C1qa	343.729	-2.04105	0.276138	1.85001e-14	1.08029e-12
Ppib	2284.61	1.51011	0.202826	1.89681e-14	1.10285e-12
Pecam1	1042.03	-2.27381	0.309856	2.0658e-14	1.19595e-12
Sult1a1	66.7227	-3.18746	0.438971	2.15374e-14	1.24153e-12
Mfap2	277.691	2.54801	0.345816	2.20442e-14	1.26534e-12
Trp53i11	121.617	-2.29261	0.312496	2.35869e-14	1.34815e-12
Rrbp1	1686.26	1.51174	0.203915	2.38921e-14	1.34845e-12
Abcc9	58.6636	-6.01162	0.790141	2.37447e-14	1.34845e-12
Tspan13	536.418	-2.87526	0.395512	2.38807e-14	1.34845e-12
Fdps	108.417	2.11352	0.289377	2.71242e-14	1.52449e-12
Gimap5	89.2168	-2.62661	0.361696	2.98547e-14	1.66409e-12
Erg	103.692	-2.70069	0.373157	2.97341e-14	1.66409e-12
Ctsk	274.725	2.61076	0.356533	3.04621e-14	1.69096e-12
F2r	171.334	1.98835	0.270627	3.21906e-14	1.77959e-12
Slfn9	154.664	1.99509	0.273939	3.63368e-14	2.0006e-12
Medag	132.984	2.46453	0.337463	4.34969e-14	2.38508e-12
Fmo2	71.1239	-3.2256	0.452848	5.72567e-14	3.12687e-12
Gins2	92.4785	2.1367	0.295714	6.11025e-14	3.32343e-12
Ndn	82.2395	2.78002	0.382621	6.6378e-14	3.59587e-12
Gm1673	109.064	2.36569	0.327154	6.85421e-14	3.69826e-12
Spon1	106.691	2.7865	0.384536	6.94504e-14	3.73234e-12
Fam114a1	176.969	1.85232	0.255701	7.04928e-14	3.77296e-12
Fxyd6	192.812	2.40483	0.333683	7.07658e-14	3.77296e-12
Col15a1	836.498	-1.8463	0.256001	7.26892e-14	3.86025e-12
Col16a1	239.292	2.65766	0.368823	7.46446e-14	3.94855e-12
Lrp1	314.802	1.95082	0.269845	7.50784e-14	3.95599e-12
Ctla2a	1298.34	-2.33136	0.325384	7.65093e-14	4.01569e-12
Dcbld2	72.6596	2.44447	0.338512	7.76417e-14	4.05934e-12
Tspan15	63.6756	-2.83752	0.397808	8.15629e-14	4.23155e-12
Map3k11	80.7398	-2.41413	0.337196	8.13513e-14	4.23155e-12
Slit3	52.1003	2.63733	0.3691	8.31537e-14	4.29755e-12
Serf1	207.485	2.17645	0.301871	8.38192e-14	4.31541e-12
Copb2	356.972	1.58887	0.219551	8.44695e-14	4.33236e-12
B2m	2447.93	-1.63383	0.226433	8.49724e-14	4.34164e-12
Sh3bp5	137.622	-2.01133	0.2807	8.63614e-14	4.39596e-12
Gbp3	83.1268	-2.61998	0.36889	9.66463e-14	4.90098e-12
Igfbp3	290.759	-1.94028	0.270568	9.76989e-14	4.93581e-12
Gimap6	234.23	-2.31129	0.324978	9.90117e-14	4.98347e-12
Megf6	46.1143	3.1214	0.442844	1.03244e-13	5.17718e-12
Slfn5	456.086	-2.37885	0.334931	1.04764e-13	5.23395e-12
Loxl1	473.317	2.79044	0.392658	1.22867e-13	6.1157e-12
Serp1	447.177	1.93354	0.270535	1.26117e-13	6.25439e-12
Tpm1	1056.9	1.64475	0.229885	1.41169e-13	6.97522e-12
Sparcl1	1408.73	-2.26503	0.320629	1.55947e-13	7.67725e-12
C1qc	190.864	-2.29342	0.323532	1.58092e-13	7.75458e-12
Snrk	204.942	-2.26604	0.321925	1.70966e-13	8.35566e-12
Sec61b	1229.28	1.59412	0.223529	1.72377e-13	8.39422e-12
Ifi44	71.9681	-2.38555	0.338795	1.96067e-13	9.51348e-12
Mecom	165.8	-2.51613	0.360327	2.08253e-13	1.00326e-11
Limch1	67.6625	-2.70722	0.387393	2.07535e-13	1.00326e-11
P4ha1	227.265	2.01588	0.285276	2.19042e-13	1.05148e-11
Col6a1	933.343	2.48451	0.353913	2.31309e-13	1.10643e-11
Prkca	73.2678	2.45944	0.347924	2.36848e-13	1.12892e-11
Ece1	298.333	-1.63753	0.231818	2.61911e-13	1.24399e-11
Kctd12b	156.203	-2.71543	0.391939	2.81385e-13	1.33179e-11
Abi3bp	218.759	2.73088	0.390133	2.94711e-13	1.38998e-11
Clmp	82.7237	2.62213	0.371716	2.97782e-13	1.39957e-11
Jam2	264.488	-2.72668	0.395385	3.59617e-13	1.68433e-11
Sdc2	149.625	2.17429	0.310313	3.63464e-13	1.69646e-11
Ifit3	44.2987	-3.70895	0.537973	3.79839e-13	1.76677e-11
Cd63	1870.33	1.99476	0.286152	4.02738e-13	1.86304e-11
Xdh	45.0184	-3.39617	0.490701	4.03296e-13	1.86304e-11
Casc4	74.7901	2.41319	0.345523	4.09663e-13	1.87877e-11
Nos3	82.7182	-2.75381	0.400793	4.10881e-13	1.87877e-11
Bgn	3200.01	2.62035	0.37839	4.08271e-13	1.87877e-11
Top2a	130.353	2.05881	0.295067	4.60563e-13	2.09634e-11
Ablim3	105.907	-2.72906	0.398385	4.6157e-13	2.09634e-11
Col4a2	1892.27	-2.14847	0.310522	4.77142e-13	2.15979e-11
Dock9	128.495	-2.49054	0.362798	4.78786e-13	2.15998e-11
Tmem204	104.476	-2.09001	0.301615	5.01761e-13	2.25608e-11
Npr1	93.8546	-2.67819	0.392144	5.50146e-13	2.46542e-11
Lyz2	1379.18	-2.36567	0.34376	5.59213e-13	2.49776e-11
Mthfd2	67.114	2.256	0.325901	5.71433e-13	2.54391e-11
Cd34	707.138	-1.99693	0.289543	5.99894e-13	2.66183e-11
BC028528	220.185	-2.6692	0.391209	6.12017e-13	2.70672e-11
Il2rg	70.6374	-2.45772	0.359066	7.04008e-13	3.10339e-11
Ushbp1	130.806	-2.66648	0.392794	7.13166e-13	3.13351e-11
Prnd	169.702	-2.2973	0.336092	7.89297e-13	3.45676e-11
Parvb	78.1181	-2.44954	0.358834	8.05263e-13	3.51527e-11
Gmppb	87.992	2.2572	0.328068	8.39301e-13	3.65204e-11
Robo4	129.302	-2.25491	0.331968	9.38856e-13	4.0721e-11
Tmem119	84.193	2.98008	0.433187	9.90574e-13	4.28264e-11
Cmtm8	117.527	-2.82718	0.41936	9.97666e-13	4.29953e-11
Fam162a	337.195	1.67629	0.244471	1.06381e-12	4.56999e-11
Ppp1r16b	65.1253	-2.59927	0.386219	1.31926e-12	5.64936e-11
Rbpms	260.584	-1.9082	0.281065	1.32686e-12	5.66395e-11
Fjx1	73.396	2.14179	0.316053	1.35152e-12	5.75099e-11
Unc45b	95.5785	-2.84706	0.426698	1.42898e-12	6.06147e-11
Lrrc59	300.621	1.53871	0.224993	1.43889e-12	6.08439e-11
Pcdh12	58.3578	-2.63067	0.391494	1.49493e-12	6.30161e-11
Plxna2	103.931	-2.15516	0.320234	1.6676e-12	7.00754e-11
Sema6d	106.65	-2.13306	0.316976	1.76171e-12	7.38004e-11
Maged2	289.837	1.88	0.2774	1.84554e-12	7.70727e-11
Gbp9	45.8478	-3.1665	0.474681	1.9555e-12	8.14127e-11
Plk4	65.4488	2.32595	0.345088	1.97155e-12	8.18284e-11
Jup	249.048	-2.1119	0.315032	1.97926e-12	8.18966e-11
Ube2c	71.3509	2.50317	0.37301	2.03305e-12	8.38648e-11
Gngt2	307.194	-2.25828	0.337878	2.10455e-12	8.65497e-11
Slc1a3	43.4144	3.55875	0.519538	2.49057e-12	1.02113e-10
P3h4	99.3458	2.03532	0.30262	2.57155e-12	1.05114e-10
Msc	101.942	2.23556	0.331883	2.59671e-12	1.05822e-10
Aspn	1462.69	2.27019	0.339884	2.60634e-12	1.05894e-10
Galnt15	53.2419	-3.09652	0.469968	2.69729e-12	1.0926e-10
Rpl39l	39.0265	3.05614	0.452748	2.74794e-12	1.10979e-10
Ccne2	55.2706	2.43979	0.367168	2.80486e-12	1.1294e-10
Gfpt2	44.8953	2.78324	0.413545	2.95763e-12	1.18737e-10
Tgm2	136.005	-2.08325	0.313788	3.17659e-12	1.27148e-10
Prkch	100.937	-2.4635	0.374067	3.32358e-12	1.32639e-10
Pitpnc1	92.3484	-2.51253	0.382	3.392e-12	1.3497e-10
Gucy1a1	35.4364	-4.24857	0.633482	3.68897e-12	1.46355e-10
Ms4a4d	46.07	2.55073	0.385194	3.75505e-12	1.48539e-10
Prex2	188.006	-2.61119	0.398217	3.80367e-12	1.50022e-10
Cavin1	905.602	-2.03347	0.306973	3.85482e-12	1.51597e-10
Praf2	133.934	1.87772	0.282733	3.98435e-12	1.56235e-10
Ptpn18	139.691	-2.16114	0.326225	4.10413e-12	1.60465e-10
She	100.541	-2.24714	0.34182	4.30398e-12	1.67793e-10
Fn1	3518.84	2.51252	0.380518	4.4703e-12	1.73775e-10
H2-Q6	85.5558	-2.68756	0.4118	4.74582e-12	1.83955e-10
Itgb5	160.09	1.76523	0.265494	4.96072e-12	1.91734e-10
Ifi203	184.242	-1.94822	0.296062	5.21784e-12	2.01095e-10
Lhx6	37.7464	-3.13623	0.478091	5.73759e-12	2.20497e-10
Sema6a	136.862	-2.15303	0.328613	6.02867e-12	2.31025e-10
C1qb	356.315	-1.98596	0.302391	6.50527e-12	2.48583e-10
H19	1182.26	2.07522	0.316349	6.65641e-12	2.53639e-10
Shank3	92.9016	-2.67659	0.414464	6.95386e-12	2.64227e-10
Ccdc88c	65.6226	-2.39592	0.367793	7.11367e-12	2.6954e-10
Nrp2	253.788	-1.56213	0.236664	7.32694e-12	2.76843e-10
Tnfaip8l1	52.1375	-2.84628	0.438093	7.39403e-12	2.78598e-10
Fkbp7	230.967	1.75112	0.265677	7.42987e-12	2.79072e-10
Cdk1	125.74	1.78769	0.271998	7.44799e-12	2.79072e-10
S1pr1	294.942	-2.19028	0.337064	7.51404e-12	2.80767e-10
Dpt	461.039	2.40757	0.369713	8.31238e-12	3.0974e-10
Itga11	51.0835	2.65889	0.404939	8.98285e-12	3.33801e-10
Fndc4	36.062	3.03231	0.460987	9.31589e-12	3.45225e-10
Rpa2	89.1851	2.00814	0.308993	9.41967e-12	3.47441e-10
Higd1a	427.426	1.6316	0.249264	9.42718e-12	3.47441e-10
Ctla2b	74.9875	-2.14753	0.330088	9.53033e-12	3.50285e-10
Csgalnact1	146.144	1.67614	0.255705	9.59673e-12	3.51767e-10
Palld	316.741	2.12419	0.326135	9.96474e-12	3.64267e-10
Ak1	42.9263	3.09449	0.469675	1.04238e-11	3.80017e-10
H2-K1	1380.24	-1.47734	0.225497	1.08438e-11	3.94265e-10
Vgll3	65.374	2.55348	0.391341	1.13373e-11	4.11099e-10
Lrrc8c	176.141	-2.03188	0.315186	1.17283e-11	4.24137e-10
Shox2	77.2835	2.79867	0.428632	1.21091e-11	4.36738e-10
Lhfp	172.672	1.87779	0.288419	1.21993e-11	4.38818e-10
Ift20	383.183	1.49465	0.228562	1.23192e-11	4.41951e-10
Uhrf1	116.625	1.8003	0.277387	1.28753e-11	4.60678e-10
Gpx7	205.501	1.69851	0.261292	1.35273e-11	4.8145e-10
Serpinh1	3204.13	1.38999	0.212467	1.35023e-11	4.8145e-10
Cenph	51.3258	2.852	0.441584	1.36628e-11	4.84992e-10
Ddost	342.819	1.4913	0.22899	1.42042e-11	5.02887e-10
Vsir	97.5765	-2.26287	0.353076	1.42779e-11	5.04173e-10
Tspan3	167.859	1.70115	0.262028	1.46757e-11	5.15521e-10
Arap3	129.728	-2.23767	0.350485	1.46749e-11	5.15521e-10
Gbp2	83.5956	-2.37786	0.372533	1.54317e-11	5.40671e-10
Lman1	502.094	1.46221	0.22489	1.61641e-11	5.64864e-10
B3gnt3	51.6084	-2.42021	0.378231	1.69833e-11	5.91959e-10
Ikbip	197.194	1.87369	0.290256	1.73079e-11	6.01715e-10
Pdzrn3	59.7685	2.73087	0.422207	1.76643e-11	6.1253e-10
Mgp	3220.24	2.18899	0.343215	1.78427e-11	6.1713e-10
Slit2	22.256	4.4523	0.687512	1.96536e-11	6.78023e-10
Mmp15	99.9542	-2.52523	0.400906	2.09862e-11	7.22151e-10
Hspa12b	88.5744	-2.61531	0.4159	2.1172e-11	7.26691e-10
Myct1	352.423	-2.12144	0.33423	2.17778e-11	7.44359e-10
Rnf213	149.357	-1.7312	0.270402	2.18523e-11	7.44359e-10
Tmem167	472.437	1.37892	0.213014	2.18481e-11	7.44359e-10
Lcp1	64.6412	-2.19632	0.344418	2.2858e-11	7.76654e-10
Apbb2	182.93	-1.74793	0.273523	2.32476e-11	7.87905e-10
Kcnj8	36.277	-9.15802	2.85063	2.55137e-11	8.62542e-10
Trim30a	69.6999	-2.24482	0.354848	2.57524e-11	8.68436e-10
Tns1	185.616	-1.82236	0.287516	2.88857e-11	9.7167e-10
Ramp2	844.561	-2.18106	0.34622	2.89588e-11	9.71705e-10
Pdpn	127.029	2.01365	0.316073	2.99137e-11	9.98677e-10
Fry	78.3996	-2.52599	0.403867	2.98383e-11	9.98677e-10
Notch4	89.9674	-2.38684	0.381026	2.99847e-11	9.98677e-10
Vwf	100.729	-2.23387	0.354573	3.13569e-11	1.04181e-09
Fat1	75.5486	2.43357	0.382141	3.2629e-11	1.08141e-09
Lpar1	134.409	2.31966	0.365633	3.28033e-11	1.08452e-09
Rasip1	244.279	-2.22687	0.355319	3.31044e-11	1.0918e-09
Ms4a7	127.716	-2.26704	0.359963	3.43992e-11	1.13173e-09
Aldh1a3	24.8787	3.67893	0.577574	3.56876e-11	1.17127e-09
Enpp1	92.2634	2.59773	0.410034	3.75466e-11	1.22929e-09
Dtl	72.9749	2.04464	0.324831	3.8045e-11	1.24259e-09
Gpr4	37.543	-2.95997	0.472683	4.04638e-11	1.3184e-09
Tek	123.879	-2.25668	0.362962	4.35072e-11	1.41074e-09
Fam43a	107.011	-2.17733	0.349751	4.34255e-11	1.41074e-09
Xaf1	105.166	-2.18991	0.351614	4.37685e-11	1.41581e-09
Lama5	92.2143	-2.52993	0.409027	4.47806e-11	1.44509e-09
Dut	277.371	1.44694	0.227982	4.52517e-11	1.4568e-09
1810055G02Rik	60.5247	2.34739	0.37282	4.88911e-11	1.57022e-09
Sorbs2	70.1471	-2.33086	0.375291	4.99196e-11	1.59944e-09
Isg15	235.374	-1.9628	0.31471	5.02275e-11	1.60549e-09
Tnfrsf12a	224.037	1.87027	0.298502	5.06015e-11	1.61363e-09
Cd151	202.103	-2.01693	0.324039	5.08919e-11	1.61906e-09
Birc5	122.728	1.95529	0.311441	5.20494e-11	1.65199e-09
Eprs	333.801	1.39591	0.220286	5.24497e-11	1.66078e-09
Mtss1	101.089	-2.1816	0.351921	5.26977e-11	1.66084e-09
Rasgrp3	121.27	-2.41278	0.39144	5.26741e-11	1.66084e-09
Entpd1	135.939	-2.28322	0.369618	5.61335e-11	1.765e-09
Cox4i2	40.7838	-3.99565	0.641642	5.82697e-11	1.82791e-09
Hacd1	128.868	1.75393	0.28044	5.87104e-11	1.83746e-09
Armh4	48.4624	2.70072	0.429687	5.96748e-11	1.86332e-09
Arhgap27	40.8132	-2.81091	0.453518	5.99475e-11	1.86751e-09
F3	38.4035	2.94022	0.467813	6.14474e-11	1.90983e-09
Wfdc17	133.919	-2.09144	0.336352	6.16069e-11	1.91038e-09
Obsl1	35.2939	2.68106	0.430577	6.37762e-11	1.97311e-09
Pdzd2	109.53	-2.18738	0.354735	6.41213e-11	1.97925e-09
1110065P20Rik	135.167	1.72173	0.275075	6.51067e-11	2.00343e-09
Fgd5	113.367	-2.36421	0.385434	6.52017e-11	2.00343e-09
Ogn	786.621	2.38125	0.385722	6.57914e-11	2.01696e-09
Col5a3	243.052	2.2048	0.354747	6.62805e-11	2.02734e-09
Il33	41.1397	3.11552	0.496754	6.69456e-11	2.04305e-09
Samd5	53.5023	-3.10592	0.512064	6.82406e-11	2.07787e-09
Scarf1	44.8435	-2.77612	0.453128	6.89262e-11	2.09402e-09
Gstm5	88.8567	2.05099	0.328837	7.00155e-11	2.12233e-09
Col4a1	3673.46	-2.00577	0.324524	7.2185e-11	2.18319e-09
Bvht	109.417	-2.08854	0.339549	7.5503e-11	2.27843e-09
Hhex	54.1009	-2.48055	0.403528	7.71466e-11	2.32284e-09
Ung	61.6604	2.1774	0.355123	7.85557e-11	2.35999e-09
Osr1	26.1748	3.2969	0.530419	8.0644e-11	2.41735e-09
Rasgrp2	83.8907	-2.1777	0.354799	8.12211e-11	2.42925e-09
Gcnt2	61.0144	-2.1704	0.351568	8.15623e-11	2.43406e-09
Lyn	153.42	-1.94988	0.317067	8.39223e-11	2.49345e-09
Vtn	59.3454	-2.61971	0.426923	8.392e-11	2.49345e-09
Afap1l1	121.29	-2.09177	0.341983	9.07034e-11	2.68901e-09
Crip2	826.388	-1.91896	0.312017	9.32684e-11	2.75898e-09
Dok4	72.4947	-2.73897	0.451702	9.36731e-11	2.76489e-09
Hcls1	39.3513	-2.79974	0.458034	9.51606e-11	2.80267e-09
Itga1	330.45	-1.62943	0.263438	9.53723e-11	2.80278e-09
Smoc2	262.744	2.43545	0.396629	9.75189e-11	2.85578e-09
Reep5	851.279	1.33849	0.214266	9.7599e-11	2.85578e-09
N4bp3	94.6481	-1.99104	0.324166	9.85141e-11	2.87631e-09
Kit	44.4913	-2.62181	0.427498	1.00335e-10	2.91998e-09
Thrsp	57.9778	-3.03952	0.503756	1.00442e-10	2.91998e-09
Rab34	83.2822	2.17283	0.352769	1.02422e-10	2.9711e-09
Hoxb7	44.2602	-2.8889	0.476281	1.03331e-10	2.99106e-09
Cdc42ep5	153.435	1.68267	0.272681	1.08869e-10	3.14461e-09
Cenpk	37.0886	2.48979	0.409465	1.14491e-10	3.29994e-09
Lratd2	33.328	-3.18985	0.524575	1.16903e-10	3.36228e-09
Prrx1	188.436	2.04542	0.333284	1.19634e-10	3.4335e-09
Ets1	560.534	-1.61535	0.262809	1.25019e-10	3.58042e-09
Card10	55.7307	-2.63455	0.437763	1.26778e-10	3.62312e-09
Kdelr2	692.259	1.51069	0.244657	1.31214e-10	3.74195e-09
Tent5a	120.847	2.28752	0.37355	1.36082e-10	3.8726e-09
Mall	89.472	-2.40982	0.401224	1.40816e-10	3.99887e-09
Tmem121	27.5254	3.4013	0.549921	1.48947e-10	4.2209e-09
Cracr2b	106.77	-2.38562	0.397748	1.54665e-10	4.37376e-09
Col14a1	372.142	2.29608	0.378582	1.55242e-10	4.38088e-09
Igfbp2	29.945	7.41434	1.34336	1.60323e-10	4.51483e-09
Pla2g4a	35.0791	2.71042	0.444609	1.61108e-10	4.52747e-09
Phf11d	65.8973	-2.37559	0.395184	1.63958e-10	4.59799e-09
Gmds	84.9919	1.79556	0.296249	1.78896e-10	5.0065e-09
Cenpm	56.9151	2.26061	0.371819	1.80541e-10	5.04206e-09
Nrros	29.3896	-3.26921	0.538669	1.94164e-10	5.41132e-09
Igfbp4	1019.06	1.72968	0.284714	1.95584e-10	5.43965e-09
Pcsk5	57.5536	2.35745	0.390742	2.00118e-10	5.55429e-09
Zfp366	48.438	-2.57375	0.431462	2.01245e-10	5.57412e-09
Surf4	382.015	1.45956	0.238615	2.03645e-10	5.62902e-09
Higd1b	30.665	-8.85796	2.83702	2.07523e-10	5.72451e-09
Pakap.1	269.497	-1.60714	0.265401	2.17949e-10	5.98759e-09
Epha3	42.3426	2.89874	0.476591	2.17686e-10	5.98759e-09
Tbx15	38.8858	2.48024	0.411994	2.20843e-10	6.05478e-09
Gbp6	32.9615	-3.47275	0.58323	2.29914e-10	6.2907e-09
Bsg	1059.17	1.29482	0.211977	2.4443e-10	6.67433e-09
Ifi205	34.2412	2.93691	0.490216	2.46741e-10	6.72382e-09
Pdia3	1107.05	1.32109	0.216691	2.53369e-10	6.89052e-09
Pik3c2b	41.1495	-2.58057	0.432648	2.66376e-10	7.22966e-09
Podn	60.3861	2.70591	0.449989	2.7492e-10	7.44658e-09
Ephb3	39.0366	2.97412	0.491108	2.78366e-10	7.5248e-09
Clec14a	121.233	-2.11284	0.356459	2.93021e-10	7.90513e-09
Col6a3	1426.11	2.16287	0.363689	2.97192e-10	7.98571e-09
Notch1	152.976	-1.61486	0.267942	2.96772e-10	7.98571e-09
Galnt18	46.8521	-2.52996	0.426084	3.04223e-10	8.15838e-09
Plcb1	85.136	-2.06411	0.348032	3.05965e-10	8.18882e-09
Tle4	46.8306	-2.44371	0.41118	3.19081e-10	8.52293e-09
Ptprs	146.962	2.09189	0.349595	3.27273e-10	8.72448e-09
Col27a1	72.6178	2.66838	0.445261	3.28444e-10	8.73843e-09
Tceal8	268.201	1.5684	0.260435	3.34184e-10	8.87364e-09
Cxcr4	56.9532	-2.18119	0.367406	3.48156e-10	9.22648e-09
Art3	63.6504	-2.49626	0.425952	3.6247e-10	9.58059e-09
Ydjc	54.2102	2.11997	0.360257	3.62939e-10	9.58059e-09
Gpx3	404.365	2.06793	0.348631	3.82382e-10	1.00741e-08
Sp100	117.568	-1.94355	0.329248	3.90523e-10	1.02531e-08
Clec2d	218.809	-1.87158	0.31626	3.90696e-10	1.02531e-08
Hells	178.491	1.57539	0.264224	4.07565e-10	1.0675e-08
Dtnbp1	121.741	1.60619	0.269703	4.16608e-10	1.08907e-08
Swi5	578.963	1.27492	0.211443	4.18277e-10	1.09132e-08
Psmb9	139.269	-1.69887	0.286001	4.20093e-10	1.09395e-08
Ly86	43.8635	-2.49923	0.423334	4.32205e-10	1.12332e-08
Mustn1	45.3935	-2.50628	0.427373	4.464e-10	1.15798e-08
Rbms3	161.998	2.11174	0.356447	4.52672e-10	1.17199e-08
Exoc6	60.4558	-2.37526	0.406309	4.71627e-10	1.21873e-08
Arhgef7	122.399	-1.5931	0.267982	4.77663e-10	1.23197e-08
Adamts9	127.695	-1.99469	0.339988	4.81897e-10	1.24052e-08
Kank3	146.771	-2.45512	0.423339	4.90424e-10	1.26006e-08
Tmem140	82.5178	-2.16302	0.370702	4.95234e-10	1.27e-08
Hp	24.9234	3.92619	0.68316	5.10388e-10	1.30638e-08
Adgrl4	375.5	-2.16628	0.371364	5.17332e-10	1.32165e-08
Atp2b4	108.502	-1.86772	0.318401	5.53338e-10	1.41096e-08
Kif26a	54.6096	-2.42705	0.419428	5.73641e-10	1.45997e-08
Mfng	56.3584	-2.43455	0.419444	5.74995e-10	1.46066e-08
Igsf10	104.106	2.13846	0.362477	5.77384e-10	1.46123e-08
Tedc1	25.5145	3.07744	0.528653	5.77248e-10	1.46123e-08
Neo1	86.325	1.98357	0.336156	5.84107e-10	1.47547e-08
Rrm1	140.586	1.61597	0.272805	5.89506e-10	1.48633e-08
Hhipl1	35.1929	2.93431	0.494134	5.9623e-10	1.50048e-08
Colec12	95.5983	2.04413	0.346394	5.99236e-10	1.50523e-08
Nrg1	21.1241	3.81918	0.6412	6.18323e-10	1.55029e-08
Afdn	337.101	-2.03058	0.349075	6.29386e-10	1.5751e-08
H2-Q4	119.02	-2.30666	0.399339	6.42269e-10	1.60436e-08
Hk2	221.197	2.28704	0.391806	6.58176e-10	1.64106e-08
Brca1	33.7157	2.74373	0.471648	6.74705e-10	1.67917e-08
Galk1	166.153	1.69765	0.290159	6.82163e-10	1.6946e-08
Yes1	142.278	-1.74732	0.298364	6.84732e-10	1.69786e-08
Arhgef3	47.4955	-2.43087	0.419768	6.9685e-10	1.72474e-08
Dbn1	123.148	1.79206	0.305677	7.084e-10	1.75011e-08
Cds2	88.4532	-1.78822	0.306245	7.16486e-10	1.76685e-08
Rnd3	152.158	1.84743	0.31485	7.21287e-10	1.77545e-08
Grap	81.6815	-2.30893	0.401268	7.25397e-10	1.78231e-08
Galnt16	29.2167	2.94561	0.503997	7.37631e-10	1.80907e-08
Ltbp3	132.756	2.13077	0.364751	7.7288e-10	1.89208e-08
Ugp2	165.044	1.50504	0.256367	8.27247e-10	2.02151e-08
Map1a	36.1453	2.55029	0.43696	8.36896e-10	2.04139e-08
Bmper	35.6592	2.86571	0.489701	8.53059e-10	2.07706e-08
Pappa	31.137	2.95324	0.504969	8.61869e-10	2.09473e-08
Mcf2l	105.071	-2.50095	0.43978	8.94013e-10	2.16895e-08
Hist1h1b	76.216	2.36769	0.407288	9.41678e-10	2.28048e-08
Gask1b	335.379	-1.36929	0.233529	9.53801e-10	2.3057e-08
Ppp2r5a	168.106	-1.50963	0.258603	9.58375e-10	2.31261e-08
Slc25a4	1236.5	1.20334	0.203865	9.98791e-10	2.40584e-08
Trib2	78.2029	-1.8924	0.328481	1.0101e-09	2.42874e-08
Sh2b3	79.5946	-1.92495	0.334539	1.01416e-09	2.43415e-08
AI506816	194.291	1.46205	0.24985	1.03392e-09	2.47717e-08
Gmnn	121.435	1.62769	0.281024	1.05262e-09	2.5175e-08
Spry4	59.3279	-2.01483	0.349683	1.05448e-09	2.5175e-08
Crlf1	36.6358	2.74055	0.473267	1.05936e-09	2.52468e-08
Filip1	91.6289	-2.3093	0.406642	1.06449e-09	2.53243e-08
Pkdcc	39.2517	2.44881	0.424866	1.06872e-09	2.53803e-08
Ephb2	29.9698	3.10835	0.531931	1.07338e-09	2.54462e-08
Plxdc2	185.222	1.62359	0.278825	1.09786e-09	2.59808e-08
Dpysl3	402.542	1.27424	0.217156	1.12396e-09	2.65519e-08
Ifitm10	19.3299	3.62326	0.623729	1.14103e-09	2.6908e-08
Ly6a	928.882	-1.9103	0.332871	1.14331e-09	2.69147e-08
Tubb2a	587.76	1.36664	0.234455	1.20239e-09	2.82562e-08
Abca3	41.1513	-2.46861	0.434417	1.21473e-09	2.84966e-08
Has2	44.658	2.65749	0.458541	1.22311e-09	2.86433e-08
Gadd45b	526.154	1.44023	0.247462	1.23516e-09	2.88753e-08
Nucb2	179.513	1.42585	0.244967	1.24937e-09	2.9157e-08
Cercam	52.704	2.56911	0.443978	1.26823e-09	2.9546e-08
Myh11	41.9391	-7.17659	1.33873	1.36258e-09	3.16894e-08
Igf1	606.421	1.85483	0.32373	1.42802e-09	3.31541e-08
Dgke	41.5996	-2.64931	0.470044	1.43539e-09	3.32679e-08
Abi3	56.8712	-2.59758	0.46331	1.45568e-09	3.36804e-08
Ctss	187.396	-2.24088	0.395225	1.4739e-09	3.39273e-08
Nrp1	582.983	-1.55107	0.269586	1.47208e-09	3.39273e-08
Cmah	26.197	3.13048	0.543484	1.47232e-09	3.39273e-08
Pim3	162.248	-1.6614	0.290391	1.55764e-09	3.57938e-08
B4galt2	45.3233	2.33151	0.4121	1.59163e-09	3.65128e-08
Ptgr1	28.7432	2.72852	0.486368	1.60436e-09	3.67423e-08
C1qtnf6	320.17	1.63623	0.28472	1.60921e-09	3.6791e-08
Csf1	124.598	1.57262	0.273638	1.65782e-09	3.78381e-08
Cmpk2	25.145	-3.6577	0.644791	1.67435e-09	3.81509e-08
Ccn2	331.385	2.20951	0.389861	1.69521e-09	3.85609e-08
Ppp1r13b	78.5912	-1.82447	0.320331	1.70096e-09	3.86268e-08
Elk3	287.543	-1.34798	0.23365	1.75433e-09	3.97718e-08
Gm13889	73.1949	-2.16467	0.382874	1.7801e-09	4.02883e-08
Ppa1	200.379	1.36167	0.236435	1.84982e-09	4.17959e-08
Tjp1	243.51	-1.65777	0.291457	1.87503e-09	4.22948e-08
Bcl2a1b	64.2659	-2.02711	0.357287	1.95012e-09	4.39151e-08
Sema3c	47.5124	2.64369	0.464653	1.99793e-09	4.49167e-08
Thbd	188.973	-1.97231	0.350979	2.00688e-09	4.50428e-08
Upp1	71.4959	-2.04188	0.362981	2.1279e-09	4.76799e-08
Irf7	96.6915	-2.22309	0.398297	2.1424e-09	4.7925e-08
Chpf	83.9406	2.01845	0.355295	2.15647e-09	4.81599e-08
Rpn1	344.202	1.35602	0.236365	2.27785e-09	5.06718e-08
Sema3f	64.0789	-2.03765	0.36221	2.28021e-09	5.06718e-08
C1qtnf2	43.1085	2.15833	0.382531	2.2792e-09	5.06718e-08
Gng11	1916.88	-1.54152	0.271496	2.33664e-09	5.18404e-08
Adgrl2	208.045	-1.55488	0.274187	2.34614e-09	5.19655e-08
Etl4	97.1367	-2.21544	0.399031	2.38294e-09	5.26943e-08
Cybb	42.1032	-2.71455	0.487043	2.39592e-09	5.28945e-08
Fbln2	1215.18	1.14867	0.199164	2.42502e-09	5.34495e-08
B3gnt9	40.1518	2.81285	0.494441	2.49699e-09	5.48566e-08
Hsp90b1	1516	1.13553	0.196972	2.49318e-09	5.48566e-08
Tspan2	114.447	-2.27122	0.410526	2.54736e-09	5.57815e-08
Sypl	192.93	-1.43271	0.251826	2.54507e-09	5.57815e-08
Bhlhe41	64.6335	2.53456	0.448454	2.56119e-09	5.59933e-08
H2-D1	1995.99	-1.65821	0.294358	2.70673e-09	5.90793e-08
Itpkb	253.521	-1.75042	0.312205	2.72558e-09	5.93948e-08
Camk4	18.7199	3.78064	0.676643	2.84135e-09	6.18178e-08
Calcrl	111.966	-1.73973	0.309518	2.85562e-09	6.20281e-08
Fkbp14	90.4427	1.91201	0.339088	2.86752e-09	6.21864e-08
Slfn2	69.6741	-1.88301	0.336365	2.89114e-09	6.25981e-08
Stard8	49.0396	-2.29913	0.414503	2.95771e-09	6.39368e-08
Rspo3	30.1415	3.03274	0.536184	3.26012e-09	7.03611e-08
Gpr180	134.885	1.44973	0.256668	3.2782e-09	7.0578e-08
Arhgap31	290.559	-1.56027	0.278023	3.28063e-09	7.0578e-08
Ephb4	126.754	-1.71665	0.307655	3.29041e-09	7.06757e-08
Dnajc3	383.04	1.23962	0.218004	3.39825e-09	7.2876e-08
Agrn	87.6642	-1.82742	0.329126	3.51354e-09	7.52288e-08
Spint2	40.5278	-2.61997	0.477015	3.53599e-09	7.55895e-08
Tmed9	783.891	1.17507	0.206278	3.5549e-09	7.58736e-08
Gbp5	31.9739	-2.68627	0.486157	3.60779e-09	7.68808e-08
Frmd4b	48.5844	-2.16384	0.391567	3.64159e-09	7.74787e-08
Ugdh	91.7742	1.82651	0.326659	3.69239e-09	7.84356e-08
Tnfsf10	62.5031	-2.47524	0.453312	3.71086e-09	7.87041e-08
Tcn2	106.863	-1.63286	0.292383	3.75999e-09	7.96209e-08
Spc24	75.7685	1.97408	0.355631	3.78227e-09	7.99672e-08
Myzap	51.3643	-2.12107	0.384921	3.80621e-09	8.03474e-08
Rad51	38.3904	2.29207	0.420028	3.99429e-09	8.41859e-08
Bcl7c	343.593	1.28908	0.228436	4.02401e-09	8.46799e-08
Adamtsl1	54.8418	2.72975	0.489079	4.0816e-09	8.57581e-08
Tmcc3	90.1049	-1.96629	0.357821	4.1186e-09	8.62667e-08
Ndufa4l2	353.255	1.80381	0.326249	4.11742e-09	8.62667e-08
Rgs5	874.872	-5.93591	1.12238	4.29856e-09	8.98966e-08
Cdipt	178.297	-1.44202	0.258028	4.3637e-09	9.11176e-08
Rflnb	815.181	-1.59139	0.286376	4.40065e-09	9.17471e-08
Caskin2	74.4482	-1.9413	0.353608	4.42235e-09	9.20572e-08
Lipe	55.1195	-2.38848	0.439703	4.4832e-09	9.31801e-08
Scarf2	103.555	1.89487	0.340921	4.51051e-09	9.36034e-08
Mxra7	359.172	1.2577	0.223514	4.55205e-09	9.43205e-08
Numbl	56.6455	2.00417	0.361245	4.59524e-09	9.50693e-08
Klf14	17.7358	3.80752	0.680037	4.64361e-09	9.59229e-08
Elovl5	114.363	-1.58261	0.285001	4.65906e-09	9.60949e-08
Dad1	883.597	1.20477	0.213559	4.6778e-09	9.63341e-08
Ptprg	163.408	-2.06548	0.378928	4.85885e-09	9.99102e-08
Fkbp9	369.821	1.38853	0.247857	4.87438e-09	1.00077e-07
Gja1	222.712	-1.39595	0.249839	4.90675e-09	1.00588e-07
Sec61g	1485.68	1.25726	0.223786	4.94364e-09	1.01191e-07
Tcf4	1191.66	-1.2814	0.228554	4.96379e-09	1.01449e-07
Cd302	195.895	1.6957	0.305479	5.02822e-09	1.0257e-07
Lmo2	107.583	-1.71523	0.30996	5.03384e-09	1.0257e-07
Nop53	204.137	-1.35352	0.24218	5.05742e-09	1.0274e-07
Dhfr	79.0712	1.73064	0.31284	5.05199e-09	1.0274e-07
Laptm5	82.6513	-1.98126	0.360328	5.11971e-09	1.03849e-07
Bik	57.3194	-1.9798	0.362311	5.44637e-09	1.10309e-07
Il10rb	84.1878	-1.80415	0.328771	5.49525e-09	1.11133e-07
Kif26b	37.5445	2.82615	0.51016	5.54273e-09	1.11758e-07
Cd274	24.9322	-3.18238	0.583685	5.53732e-09	1.11758e-07
Cdh3	18.4603	3.39245	0.617308	5.60606e-09	1.12866e-07
Nxpe4	65.9588	-2.18303	0.403457	5.64097e-09	1.13399e-07
Spns2	61.0652	-2.03305	0.374463	5.95807e-09	1.19596e-07
Aldh1a2	18.8694	3.62004	0.653036	6.05774e-09	1.21236e-07
Elmo1	79.5317	-1.93866	0.355853	6.05145e-09	1.21236e-07
Mrtfb	73.4107	-2.03291	0.374771	6.1157e-09	1.22214e-07
Tyrobp	272.177	-1.86015	0.34038	6.25045e-09	1.24722e-07
Rhobtb3	52.5886	2.23311	0.407102	6.86936e-09	1.3687e-07
Golt1b	139.485	1.43183	0.258997	7.04275e-09	1.40117e-07
Slc39a7	170.594	1.34826	0.243397	7.13249e-09	1.41694e-07
Nfix	447.814	1.556	0.283085	7.3343e-09	1.45489e-07
Lmo7	58.1581	-1.93934	0.358725	7.75302e-09	1.53569e-07
Gm46565	26.5104	-2.94224	0.545233	8.18382e-09	1.61864e-07
Adam33	17.3542	4.03801	0.72198	8.64693e-09	1.70774e-07
Efnb2	145.54	-1.43598	0.262635	8.79768e-09	1.73497e-07
Chst15	60.2045	-1.86476	0.344877	8.93516e-09	1.75951e-07
Cnpy2	466.502	1.24364	0.225644	9.47001e-09	1.86211e-07
Itpripl1	40.1103	-2.19914	0.410232	9.65287e-09	1.89531e-07
Bmp1	224.601	1.61936	0.297634	9.79055e-09	1.91955e-07
Meis2	35.2193	2.46992	0.457251	1.05059e-08	2.05681e-07
Ptprm	115.731	-1.52862	0.282054	1.05362e-08	2.05975e-07
Pgp	213.085	1.28917	0.235697	1.09613e-08	2.13974e-07
Prc1	33.4501	2.38955	0.444566	1.1001e-08	2.1444e-07
Txnip	384.209	-1.96324	0.368675	1.10785e-08	2.15639e-07
Dram1	36.5303	2.28709	0.425729	1.1199e-08	2.1767e-07
Eng	551.403	-1.53403	0.284064	1.12948e-08	2.19216e-07
Pofut2	198.939	1.33806	0.245417	1.14921e-08	2.22406e-07
Enpp4	45.608	-2.08701	0.391844	1.14759e-08	2.22406e-07
Rapgef5	127.33	-1.98046	0.373374	1.15194e-08	2.22615e-07
Tceal9	731.127	1.23981	0.226311	1.15666e-08	2.23206e-07
Nme1	725.851	1.16731	0.212544	1.16465e-08	2.24429e-07
Echdc2	23.4576	3.18495	0.585535	1.17638e-08	2.26365e-07
Ifi35	90.7181	-1.6898	0.315466	1.24077e-08	2.38414e-07
Kcna5	27.4558	-3.0476	0.57945	1.27748e-08	2.44424e-07
Chid1	57.5521	1.79174	0.334912	1.27719e-08	2.44424e-07
Nos2	37.7306	-2.47874	0.47131	1.27579e-08	2.44424e-07
Fmo1	84.3351	-2.27058	0.433156	1.28854e-08	2.46192e-07
Nasp	231.378	1.34485	0.248125	1.33296e-08	2.53958e-07
Slco2b1	21.7061	-4.15474	0.765724	1.33133e-08	2.53958e-07
Aldh18a1	58.6742	1.84977	0.345167	1.36878e-08	2.60417e-07
Emx2	23.25	3.02448	0.563168	1.37198e-08	2.60657e-07
Eif4e2	313.174	1.22351	0.224686	1.39193e-08	2.63705e-07
Chd7	57.2732	-1.92518	0.362717	1.39018e-08	2.63705e-07
Fcer1g	234.23	-1.8086	0.339443	1.40876e-08	2.66519e-07
Ncapg2	59.1663	1.92635	0.361706	1.41373e-08	2.67083e-07
Slc7a2	77.9418	1.91644	0.358062	1.41995e-08	2.67511e-07
Cyp2d22	42.3806	-2.19086	0.414509	1.41853e-08	2.67511e-07
Pgm3	53.0289	1.90919	0.35693	1.429e-08	2.68839e-07
Fryl	89.8388	-1.75135	0.328736	1.43306e-08	2.69228e-07
Creld2	108.461	1.70465	0.321017	1.44388e-08	2.70884e-07
Gimap8	55.622	-2.28657	0.438173	1.45853e-08	2.73252e-07
Slc30a1	36.5363	-2.25329	0.426203	1.46789e-08	2.74625e-07
Gars	194.398	1.35451	0.251239	1.48081e-08	2.76657e-07
Xiap	158.783	-1.49598	0.279211	1.49013e-08	2.78013e-07
Adamtsl3	36.8168	2.13832	0.404993	1.4974e-08	2.78984e-07
Cers4	60.8132	-2.08737	0.396207	1.54005e-08	2.86534e-07
Ccbe1	52.0529	2.61726	0.49082	1.54654e-08	2.87346e-07
Hmgn1	709.495	1.16549	0.214105	1.55372e-08	2.88282e-07
Klhl4	43.1012	-2.37838	0.45223	1.55723e-08	2.88537e-07
Snap47	66.4596	1.69538	0.319194	1.62834e-08	3.01299e-07
Gimap9	36.2633	-2.38647	0.455299	1.63781e-08	3.02636e-07
Cpxm1	186.907	2.10396	0.398133	1.66635e-08	3.0731e-07
Fbln1	43.6819	2.41942	0.455562	1.66766e-08	3.0731e-07
9930111J21Rik2	71.7929	-2.24945	0.43341	1.68285e-08	3.09685e-07
Rfc4	65.833	1.72437	0.325973	1.69643e-08	3.1176e-07
Bicc1	171.396	1.91178	0.360285	1.71969e-08	3.15604e-07
Klk8	45.1706	-2.50439	0.483931	1.75506e-08	3.21658e-07
Fgfr1	235.871	1.88618	0.356435	1.77524e-08	3.24914e-07
Pitpnm2	59.7572	-1.82895	0.346908	1.81054e-08	3.30926e-07
Colgalt1	304.648	1.24279	0.230426	1.86137e-08	3.39756e-07
Prdm1	30.137	-2.58972	0.495142	1.90404e-08	3.47076e-07
Cdc42ep3	141.009	-1.49794	0.28178	1.90973e-08	3.47643e-07
Myl12b	411.846	-1.45934	0.274556	1.94901e-08	3.54315e-07
Map3k1	45.2725	-2.19945	0.423788	2.00972e-08	3.64861e-07
Arhgef25	80.8729	1.65272	0.311395	2.02007e-08	3.66245e-07
Sigirr	35.6696	-2.54281	0.490124	2.03601e-08	3.6864e-07
Creb3l1	114.266	1.90565	0.360964	2.0469e-08	3.70115e-07
Fam98a	67.4686	1.94126	0.368927	2.09134e-08	3.77646e-07
Ezh2	84.3402	1.55381	0.292783	2.14486e-08	3.86791e-07
Ssc5d	131.016	2.20081	0.419752	2.15232e-08	3.87618e-07
Sar1a	422.838	1.17519	0.218473	2.18806e-08	3.9353e-07
Adam10	205.626	-1.36984	0.257444	2.20064e-08	3.95265e-07
Cyth1	77.2906	-1.92409	0.371104	2.31093e-08	4.14523e-07
Csf2rb	24.5011	-2.94342	0.564226	2.35825e-08	4.22449e-07
Pth1r	24.0738	2.63615	0.505788	2.36961e-08	4.23922e-07
Glul	172.866	-1.47756	0.280275	2.41107e-08	4.30198e-07
Pkn3	66.1507	-2.32524	0.454883	2.40841e-08	4.30198e-07
Hlx	62.1238	-2.0854	0.404191	2.49917e-08	4.45328e-07
Stard9	52.3839	-1.89303	0.364923	2.75573e-08	4.90397e-07
Oasl2	52.2051	-1.84907	0.355781	2.90749e-08	5.16151e-07
Sf3b5	457.968	1.19383	0.224313	2.90811e-08	5.16151e-07
Epn2	79.236	-1.73679	0.335501	2.98559e-08	5.29206e-07
Arl1	435.813	1.12963	0.212092	3.07275e-08	5.43941e-07
Abcb1b	69.1077	-1.80463	0.349353	3.09485e-08	5.47136e-07
Scube2	28.1974	2.86489	0.547886	3.11285e-08	5.49598e-07
Dysf	145.477	-1.64423	0.317384	3.31582e-08	5.84667e-07
Clec1a	76.2355	-2.08389	0.408476	3.34144e-08	5.88417e-07
Cald1	1289.94	1.05096	0.197181	3.38614e-08	5.95511e-07
Alpl	29.9011	-2.66556	0.520371	3.4115e-08	5.99189e-07
Hopx	23.7725	-3.94197	0.768931	3.4184e-08	5.99619e-07
Magix	35.9269	-2.96303	0.593099	3.49857e-08	6.12887e-07
Zfp469	37.152	2.71031	0.521196	3.58793e-08	6.27725e-07
Cdkn2b	21.5723	2.9611	0.571727	3.65647e-08	6.38888e-07
Tmem44	40.0782	-2.4291	0.481357	3.71834e-08	6.48857e-07
Ly6e	1424.67	-1.30261	0.248625	3.73433e-08	6.50806e-07
Ch25h	25.966	-2.8139	0.550235	3.7437e-08	6.51598e-07
Erp29	553.848	1.09905	0.207644	3.88279e-08	6.74935e-07
Nova2	39.7868	-2.49865	0.49855	3.98215e-08	6.91315e-07
Nudcd2	215.739	1.26214	0.240705	4.10887e-08	7.12398e-07
Efr3b	41.101	-2.18655	0.432345	4.27204e-08	7.39737e-07
Stap2	49.1385	-2.08519	0.411181	4.30479e-08	7.44452e-07
Dcn	948.682	1.86487	0.364826	4.3155e-08	7.45348e-07
Cdc42ep2	70.1705	-1.69433	0.330674	4.35563e-08	7.51318e-07
Sft2d2	59.5621	-1.85014	0.363031	4.41544e-08	7.60351e-07
Hoxd8	36.1469	-2.2626	0.446786	4.41927e-08	7.60351e-07
Tfpi2	66.4844	2.24609	0.438749	4.4426e-08	7.63391e-07
Lmo1	122.647	-1.81615	0.357366	4.51906e-08	7.74632e-07
Pdia6	770.371	1.20444	0.230242	4.5195e-08	7.74632e-07
Sec11a	373.59	1.19675	0.228329	4.56664e-08	7.81719e-07
Ggta1	97.9187	-1.50236	0.291525	4.57419e-08	7.82019e-07
Egfr	104.641	1.85888	0.361836	4.69153e-08	8.01063e-07
Bmpr1a	67.7048	2.0957	0.408928	4.74278e-08	8.08792e-07
St6galnac3	26.2184	-2.60723	0.515344	4.79621e-08	8.1687e-07
Flywch1	122.016	-1.52328	0.297074	4.88563e-08	8.3105e-07
Serf2	3415.07	1.19472	0.229105	4.89709e-08	8.31951e-07
4931406P16Rik	283.464	-1.31131	0.25304	4.93136e-08	8.36719e-07
Rapgef3	56.3665	-2.3499	0.472726	5.01431e-08	8.49725e-07
Gnpnat1	67.9606	1.62123	0.317097	5.26705e-08	8.91433e-07
Mxra8	308.456	1.47408	0.286053	5.31383e-08	8.98224e-07
Gm32688	32.5268	-2.74275	0.554946	5.34524e-08	9.02401e-07
Ptges	21.3957	3.14274	0.614756	5.5314e-08	9.32663e-07
Sh2d3c	39.6178	-2.44573	0.493527	5.68072e-08	9.56645e-07
Rtl8a	190.516	-1.9658	0.392414	5.73244e-08	9.6415e-07
En1	39.2679	2.56882	0.506241	5.92566e-08	9.95408e-07
Cacna1a	34.805	2.37676	0.468376	5.94827e-08	9.97962e-07
Irak1bp1	36.3366	2.0027	0.396506	6.00454e-08	1.00615e-06
Ssu2	23.6839	-3.16367	0.638942	6.11869e-08	1.02401e-06
Maged1	425.014	1.53936	0.301494	6.20436e-08	1.03706e-06
Exoc3l	23.7458	-3.06317	0.615389	6.21346e-08	1.03729e-06
Bambi	80.8884	-1.56955	0.308808	6.23976e-08	1.0404e-06
Hsd11b2	16.1722	3.22368	0.646685	6.37752e-08	1.06205e-06
Stxbp6	25.3169	-2.71656	0.545716	6.49417e-08	1.08015e-06
Bst2	1164.65	-1.26375	0.245791	6.59846e-08	1.09614e-06
Ifi47	41.1433	-2.10513	0.42209	6.628e-08	1.09969e-06
Dock7	64.4273	2.08413	0.412161	6.7287e-08	1.11503e-06
2810408I11Rik	24.573	2.69455	0.547839	6.98783e-08	1.15655e-06
Ccne1	30.2979	2.29679	0.462418	7.00327e-08	1.15768e-06
Mfsd6	43.5946	-2.23759	0.453531	7.07002e-08	1.16729e-06
Dnm1	38.3106	2.31746	0.458503	7.11207e-08	1.1728e-06
Rnase4	192.192	1.69298	0.334461	7.23714e-08	1.19196e-06
Mfap5	1574.99	3.82542	0.790857	7.49818e-08	1.23345e-06
Smim1	43.385	2.17496	0.432483	7.65812e-08	1.25823e-06
2900026A02Rik	123.526	-1.53395	0.304215	7.69726e-08	1.26312e-06
Sfr1	609.17	1.06621	0.206155	7.89559e-08	1.29409e-06
Bnc2	45.8625	2.35826	0.469523	8.10376e-08	1.3266e-06
Ppp1r14a	36.1992	-2.4553	0.497633	8.22783e-08	1.34365e-06
Fmnl1	30.905	-2.511	0.509588	8.2249e-08	1.34365e-06
Gpc6	44.3371	1.92005	0.383406	8.3412e-08	1.36051e-06
Myh10	124.77	1.46878	0.289864	8.35445e-08	1.36103e-06
Lrrn2	18.591	3.01259	0.602597	8.38898e-08	1.36501e-06
S100a4	308.309	1.50336	0.298343	8.47741e-08	1.37773e-06
Samd9l	112.857	-1.59046	0.317996	8.74382e-08	1.41932e-06
Tnfrsf21	26.5205	-2.54785	0.514946	8.87485e-08	1.43886e-06
Ptprk	55.7979	-1.82056	0.365825	8.90799e-08	1.4425e-06
Adam15	283.813	-1.51112	0.301213	8.94091e-08	1.44609e-06
Ifitm3	3163.27	-1.10741	0.216042	9.03352e-08	1.45757e-06
Stk10	38.5914	-2.12968	0.432575	9.02709e-08	1.45757e-06
Lpar6	80.1689	-2.15187	0.441072	9.07417e-08	1.46238e-06
Asf1b	22.301	2.57564	0.519575	9.18502e-08	1.47848e-06
Matn2	76.0694	2.04219	0.409084	9.36765e-08	1.50608e-06
Tpbg	38.0663	2.31941	0.464344	9.43351e-08	1.51127e-06
Sphk1	31.5031	2.32515	0.465407	9.42509e-08	1.51127e-06
Chst7	48.443	-2.02204	0.410278	9.41438e-08	1.51127e-06
Myl9	278.494	1.45768	0.289899	9.48788e-08	1.51817e-06
Gria3	39.537	2.31577	0.465119	1.01252e-07	1.61824e-06
Slc35a2	74.6327	1.52073	0.30378	1.03553e-07	1.65305e-06
Emb	47.9256	1.98724	0.400098	1.0374e-07	1.65408e-06
Gucy1b1	28.0344	-2.62389	0.535576	1.0442e-07	1.66295e-06
Cthrc1	1601.17	3.7174	0.779361	1.05758e-07	1.68228e-06
Calu	686.245	1.03137	0.201286	1.061e-07	1.68573e-06
Adgrd1	22.6109	3.02061	0.606039	1.06745e-07	1.69398e-06
Mms22l	42.5566	1.9185	0.391074	1.07461e-07	1.70334e-06
Rgl2	71.5291	-1.69786	0.343322	1.09965e-07	1.74098e-06
Ryk	180.22	1.29579	0.256381	1.10744e-07	1.75125e-06
Aldh7a1	75.2689	1.60127	0.322438	1.10892e-07	1.75155e-06
Mlf1	42.614	1.87902	0.380984	1.11702e-07	1.76021e-06
Setbp1	28.2593	2.5512	0.51688	1.11572e-07	1.76021e-06
Ccdc28b	108.655	-1.55743	0.313638	1.12277e-07	1.76721e-06
Akr1b8	62.629	1.64122	0.330309	1.14895e-07	1.80631e-06
Cenpq	47.8052	1.76768	0.359995	1.23879e-07	1.94529e-06
Casz1	24.478	-2.67945	0.550719	1.25125e-07	1.96257e-06
Yif1a	164.816	1.40224	0.281103	1.26179e-07	1.97681e-06
Sra1	260.415	1.19598	0.23728	1.27011e-07	1.98753e-06
Pnpla2	45.8382	-1.95351	0.400581	1.27213e-07	1.98839e-06
Mylip	103.108	-1.39725	0.280458	1.29061e-07	2.01493e-06
Apol10b	28.9555	-2.38854	0.493893	1.33491e-07	2.08169e-06
Nr5a2	21.4223	-2.82885	0.58001	1.34306e-07	2.09198e-06
Timp3	456.863	-1.19885	0.238602	1.34579e-07	2.09381e-06
Rasgrf2	37.2549	-2.57993	0.541138	1.38482e-07	2.15205e-06
Phactr2	129.076	-1.44874	0.292178	1.38681e-07	2.15267e-06
Gm17657	15.7038	0.115778	0.742834	1.48876e-07	2.30826e-06
D10Wsu102e	71.1634	1.64129	0.334587	1.53026e-07	2.36988e-06
Dll1	29.079	-2.47763	0.516154	1.56161e-07	2.41566e-06
Cilp	1479.16	3.1552	0.668659	1.59538e-07	2.46507e-06
Cdc42ep1	109.155	-1.46922	0.298835	1.60249e-07	2.47323e-06
Fzd4	138.299	-1.39188	0.282052	1.63637e-07	2.52243e-06
H2afy2	33.4416	2.15681	0.443276	1.63811e-07	2.52243e-06
Snta1	27.2793	2.15819	0.448766	1.67344e-07	2.5739e-06
Ppp1r2	567.577	-1.28445	0.259373	1.69309e-07	2.60115e-06
Kcnma1	18.261	2.94685	0.602988	1.70528e-07	2.6169e-06
Spp1	420.36	1.51811	0.309333	1.70941e-07	2.62025e-06
Aqp1	1000.6	-3.16436	0.676777	1.72878e-07	2.64693e-06
Ubfd1	104.198	1.40434	0.284549	1.81729e-07	2.7793e-06
Nfib	621.314	-1.06768	0.213379	1.84303e-07	2.81228e-06
Clybl	25.1443	2.24117	0.467218	1.84221e-07	2.81228e-06
Eva1a	48.6087	-1.99127	0.414847	1.85187e-07	2.82259e-06
Pkp4	79.1855	-1.55029	0.318095	1.86445e-07	2.83855e-06
Eno1	389.8	1.48822	0.304971	1.87597e-07	2.85286e-06
Ptgis	18.1077	3.06932	0.627678	1.90514e-07	2.89072e-06
Col18a1	251.597	-1.44085	0.294495	1.90423e-07	2.89072e-06
Entpd2	64.1508	2.04962	0.422338	1.91013e-07	2.89502e-06
Arf4	824.149	1.06848	0.213651	1.92644e-07	2.91647e-06
Dcakd	80.414	1.57327	0.322947	1.96115e-07	2.96568e-06
Ypel2	64.8445	-1.58363	0.325617	1.96791e-07	2.97078e-06
Dock4	89.2136	-1.5192	0.312004	1.96892e-07	2.97078e-06
Snx7	71.3569	1.53147	0.313597	1.98521e-07	2.99202e-06
Prkd2	55.0415	-1.6866	0.34824	1.99489e-07	2.99927e-06
Ndrg4	29.8575	2.58274	0.533977	1.99343e-07	2.99927e-06
Irf9	56.3765	-1.76643	0.365701	1.9967e-07	2.99927e-06
Gm20559	37.9201	-2.01403	0.421316	2.04574e-07	3.06951e-06
Sgcb	77.6013	1.57842	0.323748	2.05378e-07	3.07815e-06
Fxyd1	70.5794	1.77878	0.366369	2.05859e-07	3.08195e-06
Mtch1	912.147	1.06864	0.214579	2.10508e-07	3.14806e-06
Fbxo36	17.3306	2.84445	0.601266	2.119e-07	3.16535e-06
Rfc1	180.959	1.29272	0.263388	2.12938e-07	3.17735e-06
S100a6	6050.86	1.12342	0.227882	2.13917e-07	3.18843e-06
Reep3	265.838	-1.20114	0.244045	2.22466e-07	3.31218e-06
Myo1b	190.136	-1.29131	0.264064	2.27081e-07	3.37718e-06
Arhgef5	63.0681	-1.96609	0.415264	2.28342e-07	3.39219e-06
Gdpd5	29.7873	-2.28709	0.483322	2.31106e-07	3.42947e-06
Atp1a2	17.6833	-4.49125	0.906572	2.31365e-07	3.42954e-06
Dpep1	20.2913	2.70168	0.562262	2.3452e-07	3.47248e-06
Mmp2	311.923	1.80392	0.375859	2.35716e-07	3.48637e-06
Prpf40b	29.652	-2.22848	0.469992	2.37806e-07	3.51343e-06
Angptl1	209.439	1.89338	0.395377	2.39885e-07	3.54028e-06
Aif1	65.2202	-1.78353	0.371781	2.44176e-07	3.59966e-06
Irf1	218.404	-1.20486	0.245797	2.44934e-07	3.60689e-06
Casq2	20.7077	-6.0733	1.34616	2.45807e-07	3.61581e-06
9130401M01Rik	100.619	1.40925	0.29071	2.4729e-07	3.63366e-06
Elf1	146.287	-1.28704	0.263819	2.52362e-07	3.70414e-06
Tlr3	26.9704	-2.4321	0.517057	2.6042e-07	3.81827e-06
Cd300c2	51.7024	-2.12936	0.449652	2.64679e-07	3.8765e-06
Grrp1	109.552	-2.0716	0.442847	2.72666e-07	3.98482e-06
Rer1	467.377	1.07012	0.217117	2.72457e-07	3.98482e-06
Ncam1	133.109	2.03398	0.428102	2.7367e-07	3.99517e-06
Itsn1	59.0933	1.73141	0.360338	2.79371e-07	4.07399e-06
Myo18a	147.186	-1.76517	0.373643	2.84528e-07	4.14024e-06
Tro	19.6386	2.91505	0.609996	2.84292e-07	4.14024e-06
Cd9	584.603	-1.07406	0.218519	2.86525e-07	4.1648e-06
Cers6	43.22	2.40808	0.50463	2.89298e-07	4.20058e-06
Flnc	96.6258	1.81978	0.381841	2.89745e-07	4.20255e-06
Pycr1	26.3472	2.32431	0.491642	3.00449e-07	4.35312e-06
Fbxo17	23.2468	2.34633	0.496597	3.01271e-07	4.36035e-06
Bdh2	15.9475	2.9305	0.619781	3.04567e-07	4.40333e-06
Chst1	27.7908	-2.40104	0.51395	3.05777e-07	4.41137e-06
Hip1	134.311	-1.41689	0.295403	3.05602e-07	4.41137e-06
Oxct1	176.393	1.24834	0.256574	3.06617e-07	4.41876e-06
Gpsm2	18.3986	2.76528	0.581934	3.09311e-07	4.45282e-06
Prokr2	12.7927	4.46002	0.903787	3.16157e-07	4.54653e-06
Mybl2	22.7631	2.47598	0.539598	3.20361e-07	4.60207e-06
Nenf	438.688	1.12926	0.231596	3.26215e-07	4.68119e-06
Mcm10	22.7928	2.3148	0.499195	3.29121e-07	4.71787e-06
Klhl24	109.433	-1.40522	0.292778	3.30728e-07	4.73588e-06
B4galnt1	31.1631	2.36284	0.49867	3.31102e-07	4.7362e-06
Rhoq	94.2843	1.7416	0.366456	3.44163e-07	4.91781e-06
Ctnnb1	620.944	-1.06263	0.21782	3.46552e-07	4.94671e-06
Apold1	149.215	-1.63517	0.34629	3.58806e-07	5.1162e-06
Wnt5a	23.6511	2.48865	0.530004	3.68167e-07	5.24415e-06
Dsel	72.6222	1.55758	0.327486	3.70515e-07	5.27203e-06
Cdk14	126.165	1.4564	0.30435	3.7567e-07	5.33974e-06
Tenm3	30.9637	2.39156	0.507666	3.76156e-07	5.34102e-06
Pafah1b3	71.276	1.53983	0.3244	3.99989e-07	5.67345e-06
Vmp1	226.766	1.28258	0.267044	4.05654e-07	5.74776e-06
Gsn	357.743	1.44507	0.303652	4.07118e-07	5.76246e-06
Hrct1	32.1804	-2.54059	0.559284	4.07708e-07	5.76475e-06
Tcim	428.171	-1.5443	0.327962	4.08361e-07	5.76794e-06
Gsto1	91.3051	1.54249	0.325235	4.13016e-07	5.82758e-06
Tpst2	133.485	-1.32523	0.278125	4.16985e-07	5.87744e-06
Rpl22l1	1508.8	1.03309	0.212834	4.23651e-07	5.96517e-06
Gja5	20.8712	-3.11097	0.68093	4.25365e-07	5.97433e-06
Akr1c14	22.8322	-2.8224	0.618256	4.2563e-07	5.97433e-06
Lrch1	38.8311	-1.88645	0.405026	4.2535e-07	5.97433e-06
Qk	475.305	-1.12383	0.233695	4.44005e-07	6.22577e-06
Tcp11l2	46.6664	-1.78825	0.38275	4.49638e-07	6.29167e-06
Rnd1	59.6191	-1.91266	0.413736	4.49204e-07	6.29167e-06
Hspd1	371.313	1.10878	0.230419	4.57476e-07	6.39471e-06
Tmem255b	63.164	-2.09789	0.460493	4.59446e-07	6.4156e-06
Chodl	17.4443	-4.11963	0.867005	4.70508e-07	6.56327e-06
Mapk3	241.338	-1.42771	0.303528	4.72674e-07	6.58668e-06
Grasp	81.6403	-1.55369	0.332669	4.73352e-07	6.58932e-06
Mmd	54.7826	-1.76432	0.380757	4.75261e-07	6.60907e-06
Thbs3	48.0227	2.2003	0.472359	4.79439e-07	6.6603e-06
Ppp1r14b	747.26	1.05799	0.21938	4.82802e-07	6.70012e-06
Twist2	11.9442	4.16676	0.893106	4.87636e-07	6.76024e-06
Adcy4	106.305	-1.91027	0.41736	4.93444e-07	6.83374e-06
Tcea3	37.5343	2.29652	0.492581	4.95538e-07	6.85571e-06
Yipf5	214.179	1.16903	0.244102	4.97874e-07	6.88096e-06
Ccl6	18.4747	-3.8439	0.825759	5.00058e-07	6.90315e-06
Psme1	372.818	-1.14509	0.239624	5.00503e-07	6.90315e-06
Azin2	15.4576	3.03877	0.653943	5.09789e-07	7.02404e-06
Ptges3l	25.6305	2.17422	0.470032	5.13025e-07	7.06142e-06
Cacna2d1	47.2708	1.89576	0.407156	5.19617e-07	7.14487e-06
Ncoa3	70.1	-1.6611	0.359201	5.21482e-07	7.16321e-06
Mcm4	126.085	1.34617	0.286015	5.30241e-07	7.27612e-06
Slc41a2	21.5224	2.53595	0.547568	5.33882e-07	7.31863e-06
Exoc3l2	24.4549	-2.60727	0.575978	5.43873e-07	7.44802e-06
Sec22b	166.241	1.22624	0.257718	5.4626e-07	7.47312e-06
Emp3	536.406	1.1157	0.233621	5.55997e-07	7.59094e-06
Gzmc	12.2886	5.23957	1.09382	5.55463e-07	7.59094e-06
Ppm1f	66.1658	-1.67926	0.364533	5.72252e-07	7.79708e-06
Slc8a1	41.1529	2.07005	0.446866	5.71767e-07	7.79708e-06
Olfr558	10.3455	-6.90233	2.62589	5.8057e-07	7.90244e-06
Col23a1	20.6266	2.8096	0.605626	5.82254e-07	7.91736e-06
Calr	1227.95	1.04003	0.217282	5.86941e-07	7.96572e-06
Ssr1	366.014	1.0731	0.224452	5.86992e-07	7.96572e-06
Mmgt2	37.5726	1.88237	0.406213	5.91538e-07	8.01936e-06
Mndal	187.715	-1.2374	0.262545	5.93962e-07	8.04412e-06
Smoc1	13.1583	3.51015	0.753245	6.03802e-07	8.1692e-06
Pdia4	238.963	1.16783	0.246165	6.12561e-07	8.27939e-06
Mir99ahg	50.8659	1.92713	0.416421	6.17389e-07	8.3363e-06
Uaca	212.765	-1.44409	0.311253	6.25605e-07	8.43879e-06
Arhgap25	16.8605	-3.21508	0.703246	6.30711e-07	8.49916e-06
Bmpr1b	17.4273	3.04689	0.655181	6.3525e-07	8.55178e-06
Mgat4a	47.7681	-1.82875	0.401655	6.37128e-07	8.56851e-06
Mgarp	12.0337	4.70363	0.975139	6.57395e-07	8.83227e-06
Dnaaf2	43.455	1.66956	0.362486	6.64529e-07	8.91923e-06
Pcdh7	92.705	1.72725	0.373541	6.7274e-07	9.02047e-06
Ufsp2	99.6241	1.3156	0.280757	6.8304e-07	9.14949e-06
Osbpl9	103.38	-1.38736	0.298839	6.83834e-07	9.15103e-06
D830025C05Rik	41.0639	2.07225	0.45712	6.91724e-07	9.24744e-06
Zbtb46	35.4303	-1.96946	0.435139	6.98001e-07	9.32212e-06
Slc38a10	164.74	1.29263	0.276306	7.04556e-07	9.40036e-06
Gm4070	20.4676	-3.06958	0.68865	7.25331e-07	9.66797e-06
Cdc45	32.1654	2.00912	0.447151	7.30449e-07	9.72659e-06
Sox17	169.598	-1.91276	0.42526	7.38722e-07	9.82704e-06
Stat1	123.94	-1.2724	0.273098	7.45288e-07	9.90462e-06
Me1	33.0393	1.97183	0.430772	7.46962e-07	9.91709e-06
Npm1	2002.19	0.954594	0.200356	7.49596e-07	9.93726e-06
Rian	292.534	1.88722	0.415461	7.49954e-07	9.93726e-06
Mical2	87.321	1.36836	0.294695	7.52947e-07	9.96712e-06
Cdca5	17.7543	2.77535	0.615926	7.66493e-07	1.01365e-05
Arrb1	35.5454	-1.89388	0.41661	7.69706e-07	1.0169e-05
Fam241a	36.9237	-2.01312	0.446963	7.80448e-07	1.03008e-05
Slc38a4	30.0491	2.17292	0.477954	7.8192e-07	1.03102e-05
Sec61a1	290.205	1.18407	0.252655	7.852e-07	1.03433e-05
Plcb4	174.206	-1.41576	0.307773	7.86428e-07	1.03494e-05
Dio3os	10.7117	5.79825	1.39089	7.92118e-07	1.04141e-05
Stil	19.1864	2.63433	0.586743	7.95999e-07	1.04549e-05
Prss23	195.708	1.1714	0.249975	8.01321e-07	1.05146e-05
Bag2	27.3292	2.04899	0.453432	8.04234e-07	1.05323e-05
Adgrl1	61.6787	1.5115	0.328117	8.03915e-07	1.05323e-05
Tbx3	46.2372	-1.75893	0.386925	8.13144e-07	1.06387e-05
Dusp14	13.174	3.46063	0.760799	8.15102e-07	1.0654e-05
Jag2	78.2481	-1.97336	0.443143	8.20274e-07	1.07112e-05
Ncs1	25.2943	2.57742	0.565876	8.22209e-07	1.07157e-05
Dact1	55.3304	1.94327	0.425601	8.21866e-07	1.07157e-05
Ebpl	121.818	1.41028	0.304558	8.32659e-07	1.0831e-05
Pdia5	82.2404	1.52867	0.331503	8.32301e-07	1.0831e-05
Mia3	204.036	1.14059	0.243337	8.42992e-07	1.09548e-05
Erg28	102.268	1.27309	0.274243	8.48939e-07	1.10215e-05
Fasn	53.0265	1.56129	0.340967	8.59584e-07	1.1149e-05
D130058E05Rik	11.5151	4.28347	0.909594	8.62381e-07	1.11745e-05
Als2cl	28.0859	-2.41638	0.54877	8.85949e-07	1.14689e-05
Chaf1a	51.5798	1.65664	0.367192	8.88374e-07	1.14892e-05
Endou	19.1941	-2.98111	0.673244	8.98221e-07	1.16055e-05
Fcgr2b	33.6323	-2.10928	0.470424	9.04546e-07	1.1676e-05
H13	226.947	1.13444	0.242998	9.24785e-07	1.19258e-05
Dusp3	268.608	-1.52296	0.335582	9.2705e-07	1.19436e-05
Notch3	63.1171	-1.78193	0.394873	9.6991e-07	1.24839e-05
Atp5g1	851.078	1.06475	0.227882	9.76022e-07	1.25506e-05
Tnfaip1	233.191	-1.12121	0.24131	9.854e-07	1.26591e-05
Map4k3	106.304	-1.60419	0.356853	9.96971e-07	1.27956e-05
Zfhx4	103.6	1.89171	0.41958	1.00364e-06	1.28689e-05
Dscc1	28.6035	1.98358	0.44614	1.00586e-06	1.28851e-05
Arhgap42	43.7518	1.63661	0.361242	1.0072e-06	1.289e-05
Ptgs1	45.7668	-1.83544	0.407618	1.00955e-06	1.29079e-05
Utrn	261.716	-1.23284	0.267867	1.0151e-06	1.29665e-05
Pkn1	78.4978	-1.38397	0.303011	1.01652e-06	1.29724e-05
Snn	36.682	-1.92336	0.430819	1.02752e-06	1.31004e-05
Tal1	19.2659	-2.72818	0.616884	1.03578e-06	1.31933e-05
Nr2f1	27.3287	2.08695	0.468422	1.0417e-06	1.32561e-05
Sema7a	145.794	-1.37242	0.301256	1.04615e-06	1.33002e-05
Rnf114	58.2198	-1.52157	0.335692	1.04735e-06	1.33029e-05
Tmed2	645.156	0.959	0.204331	1.056e-06	1.34002e-05
Gpr27	16.7926	2.82067	0.632905	1.06186e-06	1.34619e-05
Glis3	17.9128	2.9154	0.650068	1.07784e-06	1.36516e-05
Cxcl14	159.203	3.9526	0.925439	1.07927e-06	1.36569e-05
Knl1	19.4015	2.54071	0.580508	1.08167e-06	1.36745e-05
Ecscr	503.564	-1.15266	0.249639	1.08619e-06	1.37188e-05
Trpm3	16.6484	-3.0143	0.67565	1.08804e-06	1.37292e-05
S1pr4	21.4547	-2.96247	0.681526	1.09892e-06	1.38535e-05
Vegfc	34.8844	-1.92565	0.432824	1.10096e-06	1.38663e-05
Stmn2	201.424	-1.78521	0.402321	1.11533e-06	1.40343e-05
Rassf9	59.6841	-2.29406	0.530127	1.12271e-06	1.41139e-05
Syne2	129.771	-1.68233	0.377584	1.12531e-06	1.41334e-05
Myo10	317.266	-1.07945	0.23327	1.1497e-06	1.44263e-05
Hoxb4	29.3053	-2.15526	0.491192	1.17737e-06	1.47599e-05
Ptk7	52.5796	1.63021	0.361394	1.18556e-06	1.48486e-05
Gspt1	291.232	1.03132	0.222037	1.18695e-06	1.48522e-05
Gm15867	22.9717	2.22289	0.500795	1.19964e-06	1.49833e-05
Ace	87.2996	-1.49315	0.332561	1.19916e-06	1.49833e-05
Ccdc34	155.361	1.16948	0.253816	1.20165e-06	1.49945e-05
Atp2a3	20.2941	-2.79698	0.639495	1.2144e-06	1.51396e-05
Sulf1	126.11	1.74274	0.388863	1.22374e-06	1.5242e-05
Tsc22d3	82.5623	-1.50401	0.335495	1.26748e-06	1.57721e-05
Vdr	6.98943	6.96131	2.62155	1.27506e-06	1.58519e-05
Steap2	21.9041	2.36364	0.53283	1.27963e-06	1.58941e-05
Dennd6a	75.9388	-1.47838	0.329684	1.28381e-06	1.59314e-05
Mrps16	321.681	1.12672	0.245301	1.28823e-06	1.59715e-05
Chst2	47.9471	1.59806	0.355348	1.28998e-06	1.59784e-05
Ank2	61.4585	1.77364	0.395517	1.29524e-06	1.60289e-05
Smc2	142.766	1.17519	0.256298	1.2979e-06	1.60471e-05
Dtx3l	58.6044	-1.54141	0.343767	1.31112e-06	1.61957e-05
Mbnl1	344.469	-1.03468	0.224185	1.32894e-06	1.6399e-05
Psmc3ip	43.3684	1.71749	0.386557	1.33001e-06	1.6399e-05
Idh2	224.026	1.19961	0.262677	1.33854e-06	1.64891e-05
Chaf1b	53.5869	1.59452	0.359024	1.34515e-06	1.65554e-05
Shisa4	29.4532	2.06506	0.46667	1.35783e-06	1.66811e-05
Igfbp6	101.46	1.8858	0.424471	1.35728e-06	1.66811e-05
Pgm1	56.3816	1.5738	0.353137	1.3643e-06	1.67453e-05
Tacc1	287.576	-1.14682	0.2511	1.37215e-06	1.68264e-05
Cryab	102.852	1.56561	0.349871	1.3809e-06	1.69183e-05
Rnf130	165.782	-1.23751	0.273058	1.40335e-06	1.71719e-05
Grk5	56.2006	-1.52531	0.341458	1.40415e-06	1.71719e-05
Tgtp2	16.4869	-3.88531	0.88178	1.41365e-06	1.72724e-05
Eef1akmt1	88.9916	1.41023	0.312181	1.42048e-06	1.73402e-05
Pbk	33.2773	1.95596	0.440963	1.43969e-06	1.75429e-05
Vegfd	14.1117	2.92007	0.678599	1.43967e-06	1.75429e-05
Slc43a3	156.368	-1.19335	0.262793	1.44787e-06	1.76266e-05
Hoxc10	47.0176	1.90281	0.42936	1.46821e-06	1.78581e-05
Crem	77.1334	-1.41032	0.314829	1.47304e-06	1.79008e-05
Cenpw	57.4684	1.6706	0.378734	1.47735e-06	1.79369e-05
Nans	144.615	1.29475	0.287374	1.48642e-06	1.80309e-05
Orai1	78.0145	-1.46088	0.327737	1.50348e-06	1.82214e-05
Spcs1	407.292	1.04805	0.228517	1.50563e-06	1.82312e-05
Cacfd1	44.7519	1.58459	0.356485	1.52112e-06	1.84021e-05
Avpr1a	19.1953	2.38848	0.548743	1.52786e-06	1.84671e-05
Timm23	283.729	1.00971	0.219694	1.53787e-06	1.85714e-05
Ms4a6c	43.5346	-2.08716	0.478514	1.56711e-06	1.89077e-05
Rtl8b	105.311	-1.6756	0.382405	1.57833e-06	1.9026e-05
Sptbn1	1301.72	-1.30168	0.290013	1.60787e-06	1.93647e-05
Plekhg1	59.1824	-1.74412	0.400094	1.63163e-06	1.96334e-05
Serping1	184.557	1.19984	0.264694	1.64773e-06	1.9807e-05
Rps2	7201.21	0.950639	0.205435	1.64899e-06	1.9807e-05
Hs3st1	36.3809	-2.15129	0.502273	1.65421e-06	1.9852e-05
Igsf3	71.398	1.70789	0.385451	1.67021e-06	2.00262e-05
Clint1	189.297	1.09931	0.241395	1.67666e-06	2.00693e-05
Pgm5	27.4735	-2.1352	0.49001	1.67678e-06	2.00693e-05
Ufm1	259.983	1.05158	0.230499	1.68579e-06	2.01592e-05
Mydgf	381.967	1.06336	0.233292	1.70382e-06	2.03568e-05
Ifit3b	15.5302	-5.60616	1.3563	1.7235e-06	2.05738e-05
Meis3	14.6845	2.83569	0.648475	1.74459e-06	2.08071e-05
Palmd	274.46	-1.71556	0.393966	1.74714e-06	2.08191e-05
Ano1	15.3088	-3.7859	0.864501	1.75215e-06	2.08603e-05
Fgf7	12.106	3.23976	0.747998	1.76058e-06	2.09422e-05
Cd44	329.653	1.32825	0.296733	1.77754e-06	2.11254e-05
Sgcd	12.9349	3.13581	0.715356	1.78085e-06	2.1146e-05
Git2	111.637	-1.2949	0.289659	1.78805e-06	2.12129e-05
Ifit2	49.492	-1.62196	0.370369	1.81508e-06	2.15146e-05
Sulf2	146.784	1.78028	0.406337	1.84786e-06	2.18647e-05
Tmsb4x	18052.9	-0.858822	0.186525	1.8477e-06	2.18647e-05
Pld4	23.7385	-2.39014	0.557591	1.90179e-06	2.24831e-05
Slc19a1	17.1523	2.68801	0.620615	1.9136e-06	2.25916e-05
Nkd2	12.5243	3.19866	0.734546	1.91431e-06	2.25916e-05
Ccdc134	21.572	2.159	0.503352	1.99226e-06	2.34909e-05
Opcml	8.52955	-6.53883	2.59074	2.03451e-06	2.39682e-05
Lpl	293.961	-1.19582	0.267849	2.06562e-06	2.43052e-05
Erlec1	141.036	1.14693	0.255732	2.06673e-06	2.43052e-05
Sox13	38.2285	-2.0242	0.476502	2.10035e-06	2.46791e-05
Ak2	191.616	1.06165	0.2353	2.12911e-06	2.49736e-05
Folr2	21.2657	-2.5998	0.613231	2.1282e-06	2.49736e-05
Pole3	118.193	1.19384	0.267522	2.16087e-06	2.5324e-05
Zfp979	71.0373	-1.86605	0.43788	2.23812e-06	2.62066e-05
Gga2	62.9598	1.59571	0.363499	2.24075e-06	2.62147e-05
Tmed1	95.7609	1.29207	0.292715	2.25923e-06	2.6408e-05
Taok2	80.362	-1.34967	0.306962	2.28512e-06	2.66874e-05
Tspan14	45.0209	-1.61039	0.370839	2.2992e-06	2.68286e-05
Unc13b	24.5926	-2.4506	0.584965	2.30273e-06	2.68466e-05
Gm9917	20.8045	-2.38717	0.560161	2.33333e-06	2.71799e-05
Cep85l	65.4208	-1.43908	0.329306	2.35944e-06	2.74603e-05
Grem2	11.8696	4.66746	1.03847	2.46275e-06	2.8638e-05
Lpar4	81.0708	-1.42453	0.325796	2.50607e-06	2.91166e-05
Usp18	21.2242	-2.39569	0.56672	2.53475e-06	2.94188e-05
Lama3	19.0175	-2.77587	0.663768	2.53644e-06	2.94188e-05
Actn4	653.772	-1.08645	0.24378	2.54709e-06	2.95169e-05
Rnf144a	98.7852	-1.2932	0.294572	2.59191e-06	3.00106e-05
Limd2	87.9613	1.32093	0.301536	2.68938e-06	3.11124e-05
Ext1	217.769	1.02996	0.230465	2.72275e-06	3.14714e-05
Pik3r6	18.0927	-2.72855	0.651376	2.76366e-06	3.1917e-05
Endog	53.6967	1.48813	0.343279	2.77903e-06	3.2067e-05
Iqgap2	58.7282	1.51962	0.349305	2.7832e-06	3.20877e-05
Fam181b	31.0845	-2.25879	0.543819	2.7857e-06	3.20891e-05
Cyp1b1	19.4745	2.54747	0.596207	2.91676e-06	3.35701e-05
Plpp5	74.294	1.35329	0.310971	2.9489e-06	3.39111e-05
Arhgef19	14.7046	3.22265	0.756915	2.95218e-06	3.39199e-05
Bnip3	61.7782	1.4893	0.345674	2.98806e-06	3.43029e-05
Fzd6	49.3679	-1.79618	0.425919	2.997e-06	3.43763e-05
Tnfsf13	43.5716	-1.6835	0.395072	3.00882e-06	3.44826e-05
Olfml1	13.3539	2.83267	0.67282	3.05013e-06	3.49263e-05
Znfx1	43.5414	-1.7131	0.404119	3.05432e-06	3.49446e-05
Trim25	84.4337	-1.39563	0.322886	3.06199e-06	3.50027e-05
Slc39a13	72.6758	1.38227	0.317677	3.08215e-06	3.52033e-05
Cgref1	12.3644	3.05223	0.71766	3.10675e-06	3.54543e-05
Klra9	8.39171	-6.47782	2.6004	3.1693e-06	3.61216e-05
Spata13	55.3293	-1.57066	0.368712	3.17058e-06	3.61216e-05
Mgat4b	105.437	-1.32699	0.305902	3.17543e-06	3.61463e-05
St8sia6	23.4306	-2.20095	0.525097	3.21385e-06	3.65528e-05
Apbb1ip	43.2566	1.59035	0.371871	3.24947e-06	3.69267e-05
Tmem150a	36.8134	1.65559	0.387491	3.33521e-06	3.78692e-05
Cyth4	21.8391	-2.32884	0.560569	3.43255e-06	3.89417e-05
Atp1b3	198.845	-1.0947	0.249187	3.4359e-06	3.89469e-05
Ctnnbip1	385.279	-1.13623	0.259819	3.45119e-06	3.90874e-05
Foxo1	78.0533	-1.30805	0.301907	3.46015e-06	3.9156e-05
Nsg1	88.0649	1.34898	0.313221	3.48631e-06	3.9419e-05
Jcad	227.68	-1.22855	0.28338	3.50337e-06	3.95787e-05
Akap5	16.9308	-4.8522	1.10908	3.53332e-06	3.98837e-05
Sema6b	30.2033	-1.94198	0.46344	3.56415e-06	4.0198e-05
Crtap	203.878	1.15544	0.264284	3.61387e-06	4.06907e-05
Sqle	25.7521	1.9881	0.472404	3.61202e-06	4.06907e-05
Ramp3	16.8949	-3.31075	0.806651	3.6532e-06	4.10993e-05
Ccdc85b	538.068	-0.973099	0.220255	3.66694e-06	4.12195e-05
Hspb8	24.5783	2.17329	0.514609	3.68817e-06	4.14236e-05
Slc6a6	329.389	-1.39796	0.327369	3.72691e-06	4.18239e-05
Klhl6	23.8416	-2.2657	0.549471	3.74094e-06	4.19464e-05
Gch1	40.1621	-1.76325	0.421298	3.76217e-06	4.21494e-05
Crabp1	40.1903	4.29296	1.04946	3.77242e-06	4.21942e-05
Uba5	130.44	1.2129	0.279581	3.77168e-06	4.21942e-05
Neurl3	25.3121	-2.2176	0.531885	3.78296e-06	4.2277e-05
Sdcbp	377.548	-0.994312	0.225725	3.80679e-06	4.2473e-05
Mamld1	19.1818	-2.45692	0.593639	3.8068e-06	4.2473e-05
Csf1r	45.1162	-1.60237	0.378284	3.83537e-06	4.27564e-05
Ahi1	36.2503	1.7393	0.411308	3.85287e-06	4.28907e-05
C3	45.9022	1.64744	0.388913	3.85377e-06	4.28907e-05
Ranbp1	627.86	0.912781	0.205947	3.89731e-06	4.33395e-05
Uck2	87.4356	1.324	0.308707	3.99714e-06	4.4413e-05
Ggt7	13.6918	2.92842	0.702948	4.0374e-06	4.47866e-05
Prr5	62.9835	1.49801	0.352955	4.03613e-06	4.47866e-05
Eef1d	755.172	0.969979	0.220178	4.05547e-06	4.495e-05
Dock6	82.3694	-1.43809	0.339764	4.09544e-06	4.52893e-05
Eya4	21.1349	2.63786	0.62774	4.09615e-06	4.52893e-05
Timp2	632.618	1.27855	0.296954	4.09456e-06	4.52893e-05
Ifngr1	270.235	-1.14313	0.264153	4.14751e-06	4.58196e-05
Rarg	62.3295	-1.69093	0.406168	4.16942e-06	4.6024e-05
5330416C01Rik	10.1374	4.07176	0.941208	4.23508e-06	4.67105e-05
Incenp	35.7224	1.71526	0.408828	4.27269e-06	4.70868e-05
Plekho1	124.227	-1.34791	0.317273	4.30658e-06	4.73829e-05
Cd300lg	315.954	-3.00686	0.759906	4.30351e-06	4.73829e-05
Fez2	109.103	-1.33436	0.313787	4.31638e-06	4.74521e-05
Dnm3	78.353	-1.34845	0.31702	4.3471e-06	4.77509e-05
Dnajc9	95.5309	1.29962	0.302959	4.38463e-06	4.81239e-05
Inpp5d	27.8234	-1.95035	0.469267	4.42234e-06	4.84589e-05
Arfip2	61.778	1.40795	0.332457	4.42215e-06	4.84589e-05
Rapgef1	118.169	-1.32621	0.312006	4.42813e-06	4.8483e-05
Kirrel	45.691	1.52344	0.359969	4.43648e-06	4.8535e-05
Sept10	66.5878	-1.47404	0.349921	4.4635e-06	4.8791e-05
Smim3	44.7086	1.80284	0.431675	4.6157e-06	5.03731e-05
AC149090.1	55.0517	-1.44174	0.341582	4.61216e-06	5.03731e-05
Prrg2	56.7972	-1.52732	0.364678	4.63151e-06	5.05048e-05
Ubl4a	108.091	1.19936	0.279749	4.63759e-06	5.05303e-05
Rnf149	46.2546	1.67358	0.398335	4.64206e-06	5.05381e-05
Tmem263	171.65	1.14604	0.265258	4.6802e-06	5.09123e-05
Cmtm6	67.1406	-1.36936	0.323398	4.72406e-06	5.1348e-05
Pi4k2b	60.7693	1.3659	0.321112	4.73739e-06	5.14514e-05
Ucp2	129.067	-1.31106	0.308984	4.77364e-06	5.18034e-05
Gm16181	17.0992	-2.6488	0.649589	4.8062e-06	5.21148e-05
Wscd1	22.667	-2.60647	0.652836	4.92734e-06	5.33854e-05
Lfng	30.1927	-2.0888	0.512514	4.94622e-06	5.35454e-05
Ubl3	174.227	-1.09154	0.252755	4.95004e-06	5.35454e-05
Ubtd2	43.4983	1.65044	0.394205	5.07446e-06	5.48473e-05
Cdca8	42.8585	1.58296	0.378528	5.08346e-06	5.49005e-05
Fam171b	34.2874	2.38577	0.576232	5.09179e-06	5.49466e-05
Ptov1	242.777	1.09339	0.253593	5.09704e-06	5.49592e-05
Sparc	12623.9	0.858037	0.194507	5.17256e-06	5.5729e-05
Angpt1	26.7443	1.98729	0.482298	5.19202e-06	5.58939e-05
Rnf125	64.7828	-1.51043	0.363423	5.22283e-06	5.61809e-05
Pak1	35.8466	1.71347	0.41083	5.23233e-06	5.62382e-05
Ier3	958.796	0.998528	0.230302	5.24449e-06	5.63239e-05
Rpsa	6808.41	1.01891	0.235471	5.32744e-06	5.71693e-05
Steap1	14.425	2.94869	0.716018	5.3331e-06	5.717e-05
Morc4	46.1179	1.52458	0.364861	5.33598e-06	5.717e-05
Nap1l1	568.824	0.994662	0.22933	5.3517e-06	5.72929e-05
Ddx60	19.5094	-2.36416	0.582144	5.37615e-06	5.7509e-05
Kcnb1	35.0981	-2.10672	0.52559	5.38137e-06	5.75193e-05
Ctsb	1010.71	-0.951279	0.219153	5.45925e-06	5.83055e-05
Pkm	771.836	1.01897	0.235956	5.46971e-06	5.8371e-05
Rcc1	31.9666	1.73089	0.420715	5.50776e-06	5.86513e-05
Oat	275.223	1.07433	0.249395	5.50462e-06	5.86513e-05
S1pr2	42.1792	1.7418	0.417766	5.50902e-06	5.86513e-05
Prkcsh	145.282	1.11274	0.259419	5.57572e-06	5.93146e-05
Dbndd2	70.9424	-1.6013	0.38981	5.65508e-06	6.01114e-05
Ripor1	82.4282	-1.24628	0.294247	5.66695e-06	6.01901e-05
Samd4	85.4265	1.31367	0.311773	5.68491e-06	6.03334e-05
Fhdc1	10.7882	3.65377	0.868667	5.70577e-06	6.05072e-05
E2f1	65.9485	1.38943	0.332077	5.78436e-06	6.12925e-05
Wls	205.104	1.24432	0.293105	5.82137e-06	6.15878e-05
C3ar1	23.4939	-2.18324	0.534803	5.81956e-06	6.15878e-05
Ntf3	16.3943	-2.7166	0.676465	5.91117e-06	6.24888e-05
Olfml2b	176.155	1.62122	0.391296	5.93027e-06	6.26417e-05
Pwwp3b	14.1766	2.61814	0.644043	5.96592e-06	6.2969e-05
Fzd1	28.462	1.91147	0.464202	6.0512e-06	6.38191e-05
Lmo4	159.899	1.06758	0.249036	6.07969e-06	6.40695e-05
Sat1	306.483	-1.0102	0.235371	6.10448e-06	6.42806e-05
Pf4	94.4275	-1.34279	0.320885	6.16153e-06	6.48306e-05
Adamts16	11.4577	3.25932	0.793593	6.1929e-06	6.51099e-05
Prdx6	281.244	1.01515	0.236297	6.26551e-06	6.5822e-05
Sec16b	17.9936	2.23116	0.551321	6.35333e-06	6.66927e-05
Dip2b	79.7532	-1.31111	0.313858	6.36728e-06	6.67352e-05
Sncaip	43.2696	-1.71199	0.420965	6.36565e-06	6.67352e-05
Il1b	38.0391	-1.98568	0.489675	6.46801e-06	6.77384e-05
Atp10a	18.4937	2.20024	0.544644	6.52176e-06	6.82483e-05
Eepd1	38.3902	-1.72652	0.42485	6.54263e-06	6.84136e-05
Tmem258	476.04	1.03698	0.243038	6.63587e-06	6.93348e-05
Lif	10.29	3.56864	0.856383	6.6882e-06	6.98275e-05
Arap2	23.1442	-2.09315	0.519194	6.69879e-06	6.9884e-05
Igfbp7	6676.03	-1.27525	0.305215	6.72469e-06	7.01e-05
Trp53i13	69.7152	1.37377	0.328759	6.75073e-06	7.02787e-05
Hsp90aa1	922.232	0.935205	0.217193	6.75226e-06	7.02787e-05
Sipa1	102.088	-1.30886	0.314353	6.76818e-06	7.03901e-05
Smad1	152.747	-1.10399	0.259939	6.79295e-06	7.05933e-05
Tnfsf11	12.0014	3.27998	0.792995	6.8198e-06	7.08178e-05
Rcsd1	22.9723	-2.10034	0.520738	6.89079e-06	7.14999e-05
Prdx4	476.448	1.00603	0.235397	6.91925e-06	7.174e-05
Atad2	151.068	1.24296	0.295708	7.0473e-06	7.30116e-05
Nmi	81.493	-1.29156	0.309896	7.07234e-06	7.32147e-05
Serpine2	152.044	1.41146	0.339928	7.21864e-06	7.46147e-05
Ddx1	167.535	1.03252	0.242913	7.21524e-06	7.46147e-05
Pcdh18	51.8283	1.68735	0.411982	7.31462e-06	7.55489e-05
Mirg	28.5672	2.11112	0.518773	7.39643e-06	7.63355e-05
Cacna1g	17.3048	2.6036	0.640126	7.40272e-06	7.6342e-05
S100b	18.4069	2.58376	0.635271	7.45682e-06	7.68411e-05
Itsn2	101.532	-1.29885	0.313959	7.53124e-06	7.75487e-05
Robo1	38.0621	1.73912	0.42553	7.79516e-06	8.02051e-05
Gpr146	39.4322	-1.75856	0.438284	7.9218e-06	8.1446e-05
Alkbh2	50.3229	1.40477	0.341162	7.93393e-06	8.15086e-05
Hat1	105.529	1.14667	0.274002	8.02174e-06	8.2348e-05
Cdc123	109.363	1.13898	0.271769	8.04523e-06	8.25263e-05
Abcg2	146.13	-1.22715	0.295981	8.22664e-06	8.43231e-05
Sipa1l2	36.174	-1.73882	0.434665	8.34246e-06	8.54453e-05
Ezh1	33.6086	-1.84597	0.464498	8.51168e-06	8.71123e-05
Plekha1	86.0145	-1.28395	0.311881	8.59706e-06	8.79194e-05
Mcm7	124.921	1.0972	0.261798	8.62216e-06	8.81093e-05
Pxn	79.9586	-1.27905	0.309593	8.65636e-06	8.83919e-05
Blm	26.6606	1.9287	0.48252	8.67124e-06	8.84768e-05
Shroom4	37.7763	-1.75593	0.440812	8.76683e-06	8.93845e-05
Prkg2	19.6302	2.12067	0.539263	8.77454e-06	8.93956e-05
Car7	20.6374	-2.8115	0.734921	8.99801e-06	9.16031e-05
Ier5l	111.262	-1.28395	0.31316	9.01097e-06	9.16659e-05
Myo1d	66.7402	-1.47088	0.363833	9.03288e-06	9.18035e-05
Cd2ap	238.296	-1.06737	0.255265	9.0381e-06	9.18035e-05
AU021092	30.5825	-2.02566	0.517977	9.04758e-06	9.18305e-05
Lyl1	16.4876	-2.60711	0.662143	9.06959e-06	9.19848e-05
Acyp2	52.3044	-1.53563	0.381617	9.24691e-06	9.37127e-05
Pde4b	232.265	-1.00672	0.239487	9.31247e-06	9.43062e-05
Dtymk	251.789	1.02516	0.244351	9.39904e-06	9.51115e-05
Map1lc3a	279.807	0.995714	0.23657	9.41906e-06	9.52427e-05
Ms4a6b	22.7402	-2.20215	0.55655	9.57013e-06	9.66978e-05
Nudt19	52.3054	1.36728	0.334778	9.60037e-06	9.69307e-05
Exo1	21.286	2.05266	0.522112	9.659e-06	9.74497e-05
Col5a1	1469.5	2.82131	0.742607	9.74309e-06	9.82246e-05
Zfpm2	20.0702	2.27572	0.570834	9.75657e-06	9.82871e-05
Mmp23	198.349	3.39604	0.903544	9.78935e-06	9.85436e-05
Cd53	24.8757	-2.28272	0.579528	9.87134e-06	9.92949e-05
Igtp	28.9248	-1.86691	0.471277	9.94495e-06	9.99608e-05
Tmem42	26.8664	1.76993	0.446087	9.9851e-06	0.00010029
Nectin2	63.7474	-1.40059	0.345505	9.99436e-06	0.000100308
Sept5	10.1369	3.53175	0.870556	1.00733e-05	0.000101025
B4galt4	49.5399	-1.61615	0.406216	1.03128e-05	0.00010335
Aldoa	793.188	0.996582	0.238378	1.03362e-05	0.000103508
Fen1	64.744	1.30875	0.321411	1.03868e-05	0.000103937
Aqp2	5.52974	6.43981	2.62088	1.05862e-05	0.000105855
Ifi211	55.5037	1.42211	0.354148	1.07162e-05	0.000107075
Ttk	15.1385	2.30274	0.593617	1.0844e-05	0.000108272
Pdk3	32.9622	1.7389	0.434578	1.09323e-05	0.000109073
Tecpr1	53.7547	-1.4531	0.361411	1.10589e-05	0.000110254
Itgav	115.009	1.34422	0.329862	1.10718e-05	0.000110301
Kdelr1	371.107	0.912064	0.21716	1.11325e-05	0.000110824
Ror2	21.1267	2.31515	0.584088	1.11714e-05	0.000111129
Cd68	65.9113	-1.7291	0.436876	1.11931e-05	0.000111263
Tfdp1	117.62	1.12637	0.274174	1.13082e-05	0.000112324
Rnf150	46.1771	1.8275	0.459039	1.13437e-05	0.000112594
Scara3	30.8532	1.90784	0.479817	1.15398e-05	0.000114456
Wipi1	114.636	1.12827	0.273706	1.1641e-05	0.000115375
Vwa1	218.602	-1.50814	0.379686	1.165e-05	0.000115379
Cmc2	73.1734	1.25864	0.308817	1.1711e-05	0.000115899
Usp1	140.4	1.07981	0.262044	1.18772e-05	0.000117371
Sema5a	56.03	1.47207	0.365626	1.18749e-05	0.000117371
Dgkh	102.732	-1.17259	0.286771	1.18958e-05	0.000117469
Hs2st1	107.318	1.15912	0.282061	1.19291e-05	0.000117706
Cpd	210.749	-1.00649	0.242802	1.19373e-05	0.000117706
Zfp651	35.8421	1.64638	0.413283	1.19524e-05	0.00011777
Pnrc2	101.067	-1.15973	0.28397	1.19964e-05	0.000118116
Lrrc3b	21.709	-2.33174	0.611611	1.20374e-05	0.000118434
Smarcc1	133.844	1.10055	0.267082	1.21084e-05	0.000119046
Lsm12	244.269	0.935615	0.224351	1.21655e-05	0.00011952
Gstm1	121.89	-1.25784	0.311463	1.22595e-05	0.000120355
Gm11627	11.4506	2.84856	0.733758	1.23788e-05	0.000121438
Krt222	14.1831	-3.03931	0.79291	1.25242e-05	0.000122775
Tnc	1684.78	3.27293	0.887561	1.26687e-05	0.000124101
Spaar	14.8642	-2.8808	0.755496	1.26802e-05	0.000124124
Clec4a1	14.5915	-2.78441	0.71649	1.27046e-05	0.000124272
Tuba1a	1368.44	1.05693	0.256901	1.27431e-05	0.000124559
Kctd11	38.4877	1.6443	0.413984	1.27874e-05	0.000124902
Clec12a	18.9141	-2.27444	0.584156	1.2824e-05	0.000125169
Tnn	18.1764	2.62139	0.668773	1.28572e-05	0.000125402
Uhmk1	44.5387	-1.54765	0.392197	1.30429e-05	0.000127121
Serp2	18.0712	2.1426	0.550655	1.31997e-05	0.000128557
Rpn2	361.672	1.00643	0.243874	1.32358e-05	0.000128815
Srprb	87.0511	1.18978	0.29325	1.34889e-05	0.000131183
Rtn1	20.3404	-2.17208	0.567277	1.36046e-05	0.000132214
Ssr3	516.354	0.924075	0.222712	1.37076e-05	0.000133119
Arhgap26	30.5245	-1.85845	0.483117	1.37225e-05	0.000133168
Pdgfd	41.3542	-1.59359	0.406514	1.37615e-05	0.00013345
Rfc2	118.829	1.1446	0.281932	1.3781e-05	0.000133543
Igsf8	66.2297	1.33388	0.335081	1.38233e-05	0.000133857
Procr	56.0998	-1.40356	0.353136	1.39617e-05	0.0001351
Rapgef4	29.1339	-1.83205	0.473533	1.40919e-05	0.000136262
Tyms	158.589	1.06718	0.261469	1.41814e-05	0.000137029
Fgfrl1	25.6354	1.75639	0.451232	1.42336e-05	0.000137435
Sema3g	47.9896	-1.60079	0.411145	1.42619e-05	0.00013761
Smpdl3a	80.7917	-1.26418	0.315091	1.43246e-05	0.000138116
Plxnb2	95.8457	1.18112	0.291515	1.45142e-05	0.000139844
Gnl1	88.7692	1.15665	0.285221	1.46211e-05	0.000140773
Samd12	27.6973	-2.43533	0.65739	1.47875e-05	0.000142274
Ak4	9.45614	3.24443	0.843474	1.48346e-05	0.000142626
Lsm3	146.625	1.10249	0.27183	1.4921e-05	0.000143355
Cdk5rap3	84.4925	1.18133	0.293102	1.51399e-05	0.000145354
Tmem208	252.667	0.97432	0.237048	1.52191e-05	0.000146011
Smco4	323.587	-1.13815	0.282323	1.53408e-05	0.000147073
Adh1	23.7858	-2.11544	0.560022	1.53726e-05	0.000147169
Bex3	115.246	1.12395	0.276975	1.5363e-05	0.000147169
Arl3	145.914	1.0177	0.249132	1.56225e-05	0.000149455
Rab5c	252.042	-1.02514	0.252058	1.58072e-05	0.000151115
Pcmtd1	125.514	-1.10672	0.274123	1.59769e-05	0.00015263
Kctd10	114.326	-1.1226	0.279236	1.65013e-05	0.000157527
Arl16	38.2808	1.51729	0.388417	1.66038e-05	0.000158394
Arhgap32	27.6673	1.73772	0.44765	1.66172e-05	0.00015841
Eef1g	1099.57	0.917941	0.223635	1.67137e-05	0.000159217
Steap4	81.8398	-1.3605	0.345333	1.67335e-05	0.000159293
Fam89a	26.1827	-2.37242	0.643212	1.67738e-05	0.000159564
Atad5	42.4565	1.58346	0.412612	1.68488e-05	0.000160164
Fkbp5	49.1258	1.40081	0.354997	1.69466e-05	0.000160981
Arhgap29	293.719	-1.14018	0.284746	1.70792e-05	0.000162126
Pbdc1	101.254	1.09414	0.270908	1.71045e-05	0.000162253
Hfe	37.3445	-1.57678	0.405656	1.74743e-05	0.000165644
Grhpr	44.8676	1.39486	0.356208	1.75468e-05	0.000166214
Prelp	59.207	1.30979	0.330711	1.75959e-05	0.000166533
Cdh11	171.566	2.88865	0.791349	1.76051e-05	0.000166533
Atp11c	38.9663	-1.63023	0.424963	1.77716e-05	0.00016799
Lcp2	18.9358	-2.25129	0.592348	1.78671e-05	0.000168774
Dazap2	214.615	-1.04818	0.259671	1.80664e-05	0.000170537
Ddx58	65.9898	-1.27422	0.321706	1.81114e-05	0.000170843
Gnai2	1751.62	-0.941288	0.231402	1.82455e-05	0.000171987
Uba7	51.9489	-1.53947	0.399403	1.84024e-05	0.000173345
Nxpe2	16.2381	-2.49661	0.671134	1.87086e-05	0.000176107
Ptprr	26.3617	-2.12681	0.571051	1.88163e-05	0.000176997
Fap	67.3116	1.55227	0.398045	1.88387e-05	0.000177083
4930579G24Rik	16.601	2.30148	0.605997	1.88761e-05	0.000177312
Ttll5	31.5898	1.60705	0.416218	1.89408e-05	0.000177796
Mcm8	11.831	2.60207	0.692752	1.95977e-05	0.000183706
Vegfa	46.8897	1.44286	0.369265	1.95875e-05	0.000183706
Spc25	23.4657	1.9761	0.519808	1.96365e-05	0.000183942
Fcgr3	33.1256	-1.77614	0.469467	1.97853e-05	0.000184992
Dact3	34.0449	1.69175	0.437861	1.97897e-05	0.000184992
Sh3pxd2b	78.0364	1.35555	0.345203	1.97815e-05	0.000184992
Spcs2	372.977	0.887853	0.218007	2.00209e-05	0.000187023
4833403J16Rik	15.6089	-2.38135	0.633186	2.01759e-05	0.000188341
Irf8	35.4649	-1.8515	0.487675	2.03766e-05	0.000190083
Dzip1l	12.4378	2.56155	0.685502	2.08271e-05	0.000194151
Hoxc8	16.6234	2.45963	0.646132	2.09748e-05	0.000195393
Clu	97.3868	-1.56765	0.41045	2.10949e-05	0.000196376
Ralgapa1	114.325	-1.20662	0.307541	2.11722e-05	0.00019696
AA467197	43.6219	-1.71499	0.452705	2.15081e-05	0.000199947
Vasp	238.635	-0.964842	0.240246	2.1851e-05	0.000202994
Adgre1	22.3285	-1.96277	0.521184	2.19148e-05	0.000203447
Wars	97.6545	-1.34305	0.347242	2.21113e-05	0.00020513
Rex1bd	343.61	0.925968	0.229376	2.21824e-05	0.000205515
Trip13	22.2186	1.88123	0.497431	2.21832e-05	0.000205515
Arl4d	22.8826	-1.89779	0.504938	2.23489e-05	0.000206908
Marc2	255.651	-0.983018	0.245741	2.25676e-05	0.000208789
Tcf19	56.4942	1.45929	0.382579	2.26166e-05	0.000209099
Fat4	50.9348	-1.33365	0.343645	2.28065e-05	0.00021071
Gm12216	34.4765	-1.66038	0.437205	2.28781e-05	0.000211227
Tmem45a	101.64	3.2162	0.902947	2.29168e-05	0.000211439
St6galnac2	21.5533	-1.96099	0.523421	2.29766e-05	0.000211847
Itm2a	832.162	1.37394	0.355691	2.32537e-05	0.000214255
Col5a2	1765.85	2.49793	0.691928	2.33224e-05	0.000214731
Sardh	23.9486	1.89692	0.50668	2.33373e-05	0.000214731
Psip1	179.321	0.963973	0.240567	2.33864e-05	0.000215037
Cenpn	14.9547	2.23623	0.603933	2.38393e-05	0.000219052
Haus6	40.6354	1.44947	0.378367	2.40303e-05	0.000220657
Cenps	42.3699	1.47445	0.388674	2.42622e-05	0.000222635
Spdl1	17.3083	2.03739	0.551578	2.44449e-05	0.000224158
Sncg	31.0302	-1.77646	0.475463	2.47874e-05	0.000227145
Anxa11	72.7694	-1.4083	0.36839	2.49285e-05	0.000228282
Timm8a1	104.438	1.07721	0.272187	2.49688e-05	0.000228496
Insyn1	12.8469	2.71084	0.719799	2.51317e-05	0.000229778
Sybu	32.5336	-1.9584	0.535965	2.51428e-05	0.000229778
Syngr1	21.1626	-2.10216	0.567912	2.53123e-05	0.00023117
Asph	105.193	1.25244	0.321044	2.56537e-05	0.000234129
Sh3gl1	177.769	0.968447	0.243287	2.56842e-05	0.000234249
Neurl1b	21.8815	-1.90586	0.512536	2.6546e-05	0.000241945
Antxr1	167.493	1.55601	0.410432	2.6774e-05	0.000243858
Sh3tc1	32.2716	-1.86504	0.509086	2.6825e-05	0.000244158
Rexo2	572.783	0.848646	0.21128	2.68747e-05	0.000244446
Gpr176	13.36	2.38089	0.645728	2.70079e-05	0.000245491
Cobll1	24.2084	-1.94561	0.529041	2.70961e-05	0.000246077
Ikbkb	52.7064	-1.30922	0.340584	2.71187e-05	0.000246077
Mmp19	33.869	1.51853	0.400009	2.71271e-05	0.000246077
Mest	1181.82	1.17379	0.301549	2.72638e-05	0.000247152
Tacc3	32.5913	1.66285	0.443081	2.73437e-05	0.000247709
E2f8	16.9714	2.11822	0.581016	2.73834e-05	0.000247903
Soat1	86.195	1.19886	0.308167	2.74252e-05	0.000247948
Unc93b1	110.715	-1.05999	0.269929	2.74099e-05	0.000247948
Rb1	41.3162	-1.60347	0.429035	2.7656e-05	0.000249867
Zfp354c	32.5055	1.66626	0.440292	2.77009e-05	0.000250105
St3gal6	56.8816	-1.49914	0.39935	2.77803e-05	0.000250654
Rplp0	7368.19	0.883281	0.223034	2.7934e-05	0.000251873
Magi1	59.4726	-1.38325	0.364013	2.80387e-05	0.000252648
Sec24d	111.97	1.2857	0.332606	2.81463e-05	0.000253448
Wnk1	368.545	-0.897679	0.22544	2.82303e-05	0.000254035
Ccn4	225.009	3.31516	0.95603	2.83641e-05	0.000255069
Dhrs13	23.8627	1.77048	0.477532	2.88755e-05	0.000259495
LTO1	37.2393	-1.57884	0.421075	2.89213e-05	0.000259733
Slc12a7	30.6891	-1.71433	0.464062	2.92156e-05	0.000262202
Ighm	11.0456	-3.72833	0.977729	2.92514e-05	0.000262349
Hpgd	31.3516	1.62285	0.433372	2.92765e-05	0.000262399
Guca1a	22.9271	1.94917	0.541169	2.94363e-05	0.000263481
Shtn1	26.3923	-1.90622	0.523328	2.94251e-05	0.000263481
Rad18	37.0574	1.51999	0.402945	2.96465e-05	0.000265187
Ipo11	56.9512	-1.32013	0.346494	2.97445e-05	0.000265887
S1pr3	75.7865	1.21172	0.315201	3.05171e-05	0.000272612
Itprid2	67.1221	-1.27606	0.334327	3.07052e-05	0.000274112
Tns2	66.9232	-1.25098	0.326479	3.08711e-05	0.00027541
Sobp	29.3228	1.84551	0.494321	3.09217e-05	0.000275679
Nelfe	86.2841	1.16755	0.302914	3.10605e-05	0.000276734
Gabarap	1207.21	0.940594	0.238338	3.13772e-05	0.000279371
Hipk1	143.009	-0.981414	0.249987	3.15102e-05	0.00028037
Zfp467	34.3954	-1.65941	0.450492	3.17754e-05	0.000282543
Melk	18.5518	2.16183	0.592591	3.19183e-05	0.000283627
Txnl4a	194.177	0.945328	0.240121	3.19938e-05	0.000284111
Col12a1	1078.56	2.85551	0.822486	3.21093e-05	0.000284949
Aldh1l2	14.6539	2.30282	0.641225	3.21712e-05	0.00028531
Klf7	216.869	-1.05287	0.270353	3.22925e-05	0.000286198
Ctnna1	355.182	-0.980878	0.251379	3.37733e-05	0.000299125
Slc39a6	52.3415	1.32914	0.349051	3.38762e-05	0.00029984
Dse	62.3206	1.60104	0.428849	3.41439e-05	0.000302011
Rps6ka3	114.565	-1.1772	0.30856	3.47816e-05	0.00030745
Pcna	345.601	0.865082	0.219092	3.52706e-05	0.000311569
Hjurp	127.742	1.14492	0.297878	3.57126e-05	0.000315267
Itpr3	28.803	-1.7606	0.485623	3.60484e-05	0.000318023
Lum	378.73	1.39979	0.373531	3.64352e-05	0.000321225
D830030K20Rik	14.8261	-2.68558	0.75674	3.65129e-05	0.000321699
Dipk2b	17.4708	-2.33768	0.658639	3.68676e-05	0.000324613
Il1r1	103.49	1.11619	0.290864	3.71723e-05	0.000327082
Cdc16	121.324	1.05475	0.27292	3.7423e-05	0.000329073
Ifi27	561.373	0.845196	0.214476	3.74655e-05	0.000329233
Inpp1	53.3093	-1.33182	0.354899	3.77334e-05	0.00033117
Psap	961.032	-0.9256	0.237227	3.7735e-05	0.00033117
Wasf2	363.933	-0.905288	0.231711	3.77904e-05	0.00033144
Ldlr	39.1565	1.52454	0.408727	3.82579e-05	0.000335322
L3hypdh	26.3683	1.79533	0.493043	3.83018e-05	0.000335489
Gcat	17.7993	2.00939	0.56108	3.83557e-05	0.000335743
Arfgap1	68.2717	1.18553	0.31147	3.83907e-05	0.000335832
Esco2	17.1944	2.07968	0.572991	3.85298e-05	0.00033683
Slc12a6	43.7777	-1.43152	0.386512	3.88027e-05	0.000338995
Aunip	13.1481	2.33662	0.666407	3.88536e-05	0.000339221
Rab23	43.7222	1.35869	0.363069	3.89154e-05	0.00033954
Pik3cb	30.2734	-1.70014	0.469177	3.92578e-05	0.000342307
Rasal2	99.714	-1.14511	0.301329	3.97066e-05	0.000345925
Pcmtd2	34.4433	-1.56342	0.42682	3.9724e-05	0.000345925
Ust	18.6034	2.23678	0.615665	4.01361e-05	0.000349287
Pald1	41.3276	-1.4454	0.391203	4.02595e-05	0.000350136
Steap3	32.0875	1.84403	0.503055	4.04198e-05	0.000351303
Slc39a14	61.8864	1.32293	0.351969	4.16519e-05	0.000361779
Chp2	19.874	-2.14902	0.605788	4.24377e-05	0.000368367
Pard3	34.1137	1.56135	0.424269	4.25671e-05	0.000369253
Dnlz	135.452	0.978252	0.254038	4.27189e-05	0.000370331
Tssc4	96.7781	1.06748	0.279808	4.27772e-05	0.000370598
Fndc3b	257.445	1.12009	0.294462	4.3783e-05	0.000379069
Gm36756	12.6381	-2.82919	0.806341	4.4065e-05	0.000381265
Pttg1	78.6794	-1.18141	0.314133	4.44735e-05	0.000384553
H1fx	30.6435	1.69494	0.467021	4.45086e-05	0.000384611
Rab2a	633.542	0.79264	0.202508	4.52032e-05	0.000390363
Crabp2	13.1526	2.63634	0.733222	4.54548e-05	0.000392284
Gpihbp1	1157.6	-2.49631	0.735329	4.57559e-05	0.00039463
Evc	14.6567	2.35264	0.659017	4.58428e-05	0.000395127
Gm26632	20.0273	-2.12885	0.605461	4.58819e-05	0.000395212
Pparg	34.1597	-1.97563	0.568226	4.59468e-05	0.000395518
Mylk	115.228	-1.1026	0.291895	4.61708e-05	0.000397193
Zmiz1	142.301	-0.985027	0.257638	4.63573e-05	0.000398542
Tead1	159.384	1.15483	0.305571	4.66078e-05	0.000400441
Hebp2	16.5594	2.13898	0.596444	4.7033e-05	0.000403837
Gm17501	21.1842	1.80457	0.507243	4.73876e-05	0.000406623
Adcy7	40.359	1.6106	0.440155	4.75576e-05	0.000407823
Rassf8	46.6265	1.31357	0.353311	4.77943e-05	0.000409592
Heg1	288.4	-1.05004	0.277305	4.78614e-05	0.000409906
Adgre5	113.762	-1.04099	0.274795	4.86527e-05	0.000416419
Fdx2	133.294	0.980719	0.256685	4.88044e-05	0.000417452
Ccl8	73.3785	-1.61663	0.452973	4.89016e-05	0.000418018
Sec31a	253.93	0.949479	0.2474	4.94235e-05	0.000422209
Gfpt1	97.7725	1.31514	0.354111	4.94544e-05	0.000422209
Lig1	146.61	1.0973	0.291745	4.96664e-05	0.000423483
Mex3b	65.9501	1.36669	0.368927	4.96524e-05	0.000423483
Dram2	76.3401	-1.15447	0.3086	4.99313e-05	0.000425204
Enox1	17.6177	2.04322	0.574033	4.99256e-05	0.000425204
Rgs16	80.458	-1.15554	0.309553	5.00274e-05	0.000425754
Abtb2	9.01362	2.9612	0.839671	5.00919e-05	0.000426034
Ephb1	18.0375	-2.04385	0.575834	5.01549e-05	0.000426301
Bag1	362.66	0.88736	0.230914	5.18175e-05	0.000440155
Podxl2	14.828	2.35466	0.662396	5.21048e-05	0.000442317
Hyal2	70.8954	-1.25804	0.341416	5.26168e-05	0.000446382
Eif4ebp2	107.353	-1.06225	0.282802	5.34067e-05	0.000452799
Baz2a	42.9171	-1.37067	0.374373	5.35427e-05	0.000453667
Podnl1	12.7717	2.59073	0.728666	5.37157e-05	0.000454847
Stt3a	201.362	0.98435	0.258691	5.3789e-05	0.000455182
Tesc	5.4446	-5.58059	2.55012	5.3826e-05	0.00045521
Sdf2l1	86.7137	1.15229	0.309483	5.4088e-05	0.000457138
Slc35b2	102.884	1.05157	0.278461	5.41496e-05	0.000457372
Mansc1	21.5425	-1.94335	0.557755	5.42561e-05	0.000457413
Peg13	35.898	-1.47706	0.409771	5.42128e-05	0.000457413
Mpeg1	50.0029	-1.77802	0.502584	5.42342e-05	0.000457413
Phlda1	279.308	1.15343	0.309055	5.4331e-05	0.000457758
Ahr	34.7946	-1.67168	0.470726	5.44643e-05	0.000458595
Sdc1	80.0962	1.31443	0.357117	5.48719e-05	0.000461451
Gm3558	5.27881	-5.56689	2.54464	5.48632e-05	0.000461451
Tead4	11.3692	-2.94499	0.845085	5.49641e-05	0.000461938
Golgb1	201.758	0.902571	0.236371	5.50011e-05	0.000461962
Plaat3	275.941	0.928605	0.243391	5.50487e-05	0.000462073
Wnt11	11.8271	2.46162	0.718024	5.53607e-05	0.000464404
Il13ra1	79.8494	1.24667	0.336284	5.61686e-05	0.000470888
Rasa4	45.7467	-1.48021	0.411799	5.62766e-05	0.000471493
Crybg1	13.9796	-2.42268	0.70066	5.63108e-05	0.000471493
Matn3	7.70507	3.71676	1.06712	5.6577e-05	0.000473429
Kmt5b	63.0423	-1.18964	0.321324	5.68685e-05	0.000475573
Bmp6	39.497	-1.61378	0.456405	5.77392e-05	0.000482555
Plxdc1	9.44985	-4.70059	1.42263	5.77982e-05	0.000482749
Spi1	24.6225	-1.79978	0.508094	5.7972e-05	0.000483602
Psmb8	345.696	-0.917085	0.241334	5.794e-05	0.000483602
Tgfb2	110.684	1.22048	0.329755	5.80249e-05	0.000483744
Tmem120a	34.5315	1.4904	0.412085	5.86313e-05	0.000488498
Gli3	41.144	1.60121	0.444386	5.87685e-05	0.000489338
Tpp1	78.5041	-1.13416	0.305356	5.8972e-05	0.00049073
Ccng2	29.2266	-1.57007	0.43878	5.96872e-05	0.000496375
Efs	18.2943	2.03481	0.575516	6.00761e-05	0.000499301
Srp9	541.732	0.820104	0.213772	6.01236e-05	0.000499389
Ldha	869.704	0.877432	0.23043	6.02488e-05	0.000500121
Klf10	153.615	-0.969116	0.257199	6.03422e-05	0.000500588
H6pd	25.8629	1.62382	0.454924	6.08766e-05	0.000504711
Sigmar1	92.3415	1.17504	0.320328	6.10618e-05	0.000505935
Ang	22.7391	1.8553	0.523762	6.12937e-05	0.000507545
Rfc3	80.0389	1.07827	0.289441	6.25827e-05	0.000517583
Gmfg	44.2619	-1.51328	0.42323	6.25481e-05	0.000517583
Ccna2	27.78	1.62622	0.455413	6.27127e-05	0.00051834
Morf4l2	496.149	0.847903	0.222332	6.27855e-05	0.000518625
Dpysl2	222.911	-0.932563	0.247162	6.29143e-05	0.00051937
Umps	53.2276	1.33604	0.372698	6.38231e-05	0.00052655
Postn	7641.37	2.46309	0.73919	6.50297e-05	0.000536177
Runx1	399.685	2.50537	0.755563	6.50886e-05	0.000536335
Aldh2	219.439	-0.99949	0.267996	6.56881e-05	0.000540945
Col1a1	11755.5	2.52281	0.761233	6.59151e-05	0.000542483
Gk5	18.4499	1.9279	0.549593	6.6191e-05	0.000544089
5033406O09Rik	14.0295	-2.32329	0.673994	6.61705e-05	0.000544089
Arsj	11.4637	2.78549	0.792923	6.63841e-05	0.000545344
Orc1	15.0109	2.06602	0.609046	6.70517e-05	0.000550158
Gnl3	176.126	0.902037	0.239204	6.70294e-05	0.000550158
Derl1	175.717	0.991203	0.264812	6.71559e-05	0.000550678
Trim27	92.1042	1.06495	0.287349	6.72824e-05	0.00055138
Enpep	12.5278	-2.64036	0.771524	6.76133e-05	0.000553756
Hspa1b	94.0293	-1.59123	0.455187	6.77416e-05	0.00055447
Lifr	113.829	-1.10657	0.300933	6.88591e-05	0.000563275
Mef2a	216.203	-1.10264	0.300644	7.01862e-05	0.000573783
Prss35	19.2091	2.07649	0.600007	7.0254e-05	0.000573989
Mcm3	173.8	0.998445	0.26888	7.05891e-05	0.000576378
Sh3bgrl2	24.7998	-1.71101	0.492408	7.10241e-05	0.000579579
Aspm	13.7281	2.18984	0.640131	7.11469e-05	0.00058023
Ripply3	25.2736	-2.02663	0.604808	7.16634e-05	0.000584089
Rfc5	53.2339	1.26111	0.350531	7.17999e-05	0.000584849
Cd14	77.0501	-1.48426	0.419702	7.28494e-05	0.00059283
Cysltr1	13.9636	-2.48026	0.728376	7.28676e-05	0.00059283
Sppl2a	164.05	-0.918326	0.245406	7.30223e-05	0.00059373
Ift27	98.3111	1.04981	0.284861	7.44399e-05	0.000604891
Mast2	50.5626	1.2513	0.34604	7.47782e-05	0.000606972
Fads1	56.9348	1.2341	0.34015	7.47859e-05	0.000606972
Actn1	350.832	0.843434	0.223588	7.51976e-05	0.000609946
Clec10a	5.01446	-5.46855	2.54519	7.52527e-05	0.000610027
Klf13	186.837	-0.969053	0.261551	7.55332e-05	0.000611932
Gm26771	36.0382	1.98042	0.573666	7.59986e-05	0.000614959
Axl	81.0207	1.3094	0.362982	7.60436e-05	0.000614959
Diaph3	28.3103	1.60638	0.461012	7.5962e-05	0.000614959
Tanc1	119.98	-0.99966	0.270261	7.63388e-05	0.000616976
Fmnl2	41.839	1.38008	0.385075	7.69405e-05	0.000621467
Tyro3	10.5193	2.69642	0.781801	7.7808e-05	0.000628099
Hyou1	66.092	1.18879	0.329212	7.79519e-05	0.000628883
Elk4	118.212	-1.01572	0.275882	7.84282e-05	0.00063197
Dhx58os	8.67877	2.94971	0.888714	7.84152e-05	0.00063197
Msn	819.929	-0.783894	0.207638	7.91018e-05	0.000637017
Cr1l	125.52	-1.00644	0.273444	7.93029e-05	0.000638256
Trip6	57.8162	1.25684	0.349945	7.93517e-05	0.000638268
Tbkbp1	31.6039	-1.56642	0.45171	7.94659e-05	0.000638806
Adk	58.383	1.20694	0.333222	7.95704e-05	0.000639265
Zyx	332.121	0.908917	0.24394	7.9726e-05	0.000639753
Arhgef12	276.66	-0.963613	0.26069	7.97184e-05	0.000639753
Prickle3	29.9961	-1.61761	0.468823	7.98622e-05	0.000640465
Ccrl2	58.5411	-1.24417	0.346089	8.06304e-05	0.000646241
Slc6a8	55.7054	1.30861	0.368629	8.07702e-05	0.000646977
Lipa	102.897	-1.02738	0.279672	8.09403e-05	0.000647954
9530082P21Rik	22.1836	-1.79778	0.525734	8.12717e-05	0.000650222
Yipf3	170.138	0.949048	0.256432	8.20589e-05	0.000656131
Zfp9	37.1215	1.61403	0.461333	8.21857e-05	0.000656755
Pabpc1l	15.6353	-2.17541	0.645839	8.25738e-05	0.000659466
Midn	156.57	-1.0645	0.29124	8.26357e-05	0.00065957
Arhgef40	79.8746	1.05339	0.287531	8.27482e-05	0.000660077
Cav2	451.807	-2.28554	0.701525	8.35588e-05	0.000666149
Slc20a1	97.9487	1.09426	0.299815	8.39267e-05	0.000668623
Hip1r	41.3042	-1.56892	0.456731	8.39682e-05	0.000668623
Ahnak2	36.939	1.47256	0.416949	8.47153e-05	0.000674174
Cenpu	15.4671	1.92781	0.568885	8.48371e-05	0.000674347
Atxn10	161.995	0.966237	0.261661	8.48199e-05	0.000674347
Dusp22	50.4807	-1.40071	0.401042	8.49051e-05	0.00067449
Nacad	7.62215	3.55138	1.01761	8.5618e-05	0.000679753
Gaa	67.3574	1.14962	0.3172	8.56757e-05	0.000679812
Plekhg5	57.3201	-1.27784	0.361296	8.69856e-05	0.00068964
Tdrp	11.3437	-2.68515	0.800481	8.70166e-05	0.00068964
Slc31a2	45.2156	-1.29553	0.365755	8.93327e-05	0.00070758
Cerk	40.5366	-1.34243	0.381902	9.01881e-05	0.000713936
Epha2	21.3163	-1.78191	0.521423	9.03894e-05	0.000714691
Timm17b	121.77	1.00087	0.274139	9.03719e-05	0.000714691
Cavin2	1066.17	-2.49382	0.781635	9.04962e-05	0.000715116
Zfp771	93.4395	1.0622	0.292488	9.06289e-05	0.000715446
Atxn3	35.6583	-1.52802	0.443239	9.0644e-05	0.000715446
Arhgap24	48.8002	1.51912	0.433409	9.159e-05	0.00072249
Irgm2	28.3849	-1.52426	0.440336	9.16637e-05	0.000722648
Eri1	66.544	1.11808	0.309702	9.18037e-05	0.00072333
Icam2	359.499	-2.2691	0.703413	9.21315e-05	0.000725489
Slc43a2	19.2781	-1.963	0.579953	9.23861e-05	0.000727069
Lgals9	237.54	-0.954891	0.261106	9.33092e-05	0.000733906
Atf5	62.5456	1.22236	0.344814	9.3383e-05	0.000734058
Sash1	153.729	-0.95493	0.260873	9.35893e-05	0.000735251
Bola1	88.6539	1.07132	0.29698	9.38518e-05	0.000736884
Mdga1	12.3878	2.48499	0.73496	9.39441e-05	0.00073718
Rnf26	33.9461	1.47503	0.422399	9.43067e-05	0.000739595
Klhl2	32.9357	-1.4239	0.408817	9.47923e-05	0.000742971
Adarb1	91.4839	-1.15645	0.324799	9.52911e-05	0.000746447
Lrrc8a	106.743	-1.02025	0.281382	9.60303e-05	0.000751801
Trim37	71.9811	-1.59684	0.470586	9.62823e-05	0.000753337
Gkn3	10.0127	-4.74198	1.51357	9.63455e-05	0.000753394
Pdgfra	71.8825	1.39526	0.396885	9.66944e-05	0.000755247
Pak3	11.3292	2.30203	0.687724	9.66705e-05	0.000755247
Lsmem1	24.1307	1.91739	0.560512	9.67928e-05	0.000755376
C1qtnf3	968.163	2.53424	0.794933	9.6823e-05	0.000755376
Rhbdf2	24.489	-1.64951	0.483497	9.6919e-05	0.000755688
Nes	245.484	-0.990451	0.272823	9.76401e-05	0.000760871
Scpep1	74.4988	1.13063	0.314585	9.82853e-05	0.000765456
Cx3cr1	16.4845	-2.34518	0.705527	9.86175e-05	0.000767601
Tmem243	41.5827	-1.35823	0.389133	9.89046e-05	0.00076856
Lrig3	61.3311	2.91697	0.919495	9.88389e-05	0.00076856
Atp1b2	11.3092	-2.7242	0.815576	9.89117e-05	0.00076856
Vash1	24.4235	-1.9381	0.588623	9.9029e-05	0.000769028
Derl2	105.32	1.00447	0.276342	9.97271e-05	0.000774004
Arhgdib	96.3314	-1.10246	0.307335	0.000100073	0.000776242
Prrg3	68.9554	-1.18361	0.334719	0.000100716	0.00078078
Mcm5	130.367	1.12514	0.316202	0.000101001	0.000782542
Git1	80.0648	-1.16554	0.328435	0.000101093	0.000782805
Hspe1	657.285	0.786222	0.211612	0.000101258	0.000783629
Fcgr1	11.7529	-2.59417	0.775831	0.000101694	0.000786552
Samsn1	11.9169	-3.01191	0.914492	0.000102586	0.000792999
Ccdc8	23.7141	1.78462	0.522864	0.00010493	0.000810655
Cope	360.09	0.894698	0.244643	0.000105242	0.000812598
Prr13	189.238	-1.01368	0.281424	0.000105956	0.000817647
Asah2	50.3643	-1.27419	0.363843	0.000107869	0.000831928
Tmem107	37.0233	1.33948	0.385762	0.000109484	0.000843904
Atp8a1	41.1377	-1.37034	0.396116	0.000109628	0.000844526
Tmc6	30.4478	-1.52913	0.449893	0.000110154	0.000848101
Dab2ip	177.814	-1.15502	0.328019	0.00011031	0.000848812
Prdm16	25.8689	-1.85945	0.56821	0.000110482	0.000849655
Arhgef1	117.354	-1.10737	0.312123	0.000110748	0.000851214
Nras	131.525	-0.941073	0.259305	0.000110852	0.000851529
Sertad4	41.8541	1.66166	0.487336	0.000111095	0.000852906
Halr1	19.9011	-2.20613	0.688449	0.000112159	0.000860587
Ica1	37.0954	-1.49649	0.441344	0.000112301	0.000861186
Pcolce2	8.09422	3.13606	0.928417	0.000112423	0.00086163
Pabpc4	98.7001	1.03758	0.288661	0.000113003	0.000865583
Alg5	154.594	0.922	0.253942	0.000113166	0.000866342
Irf2	122.408	-1.08653	0.306703	0.000113704	0.000869969
Ccdc152	22.2929	-2.1873	0.681444	0.000113778	0.00087004
Shcbp1	19.5515	1.72633	0.518758	0.000115869	0.000885528
Gramd3	30.7321	1.45254	0.423189	0.000117459	0.000897173
Angptl2	129.701	1.22097	0.348107	0.000119686	0.00091366
Hist1h1c	65.7083	-1.2382	0.356604	0.000120282	0.000917696
Mki67	79.2842	1.0825	0.305057	0.000120745	0.000920708
Mrpl18	293.931	0.817206	0.223748	0.000121973	0.000929022
Egfl8	10.4658	-2.83824	0.863122	0.000121909	0.000929022
Ltbp1	77.1239	1.14085	0.323266	0.00012254	0.000932809
Nek6	69.7035	1.12155	0.319244	0.000123696	0.000941082
Tgfb1	241.622	-0.98235	0.275098	0.000124347	0.000945502
Fkbp2	247.736	0.940233	0.261937	0.000124711	0.000947735
Gdf15	60.7355	-1.31444	0.38346	0.000125199	0.000950906
F2rl3	11.5181	-2.7264	0.838764	0.000126458	0.000959931
Pdlim1	356.318	-0.847399	0.233763	0.000127465	0.000967026
Kif1c	95.246	-1.04371	0.295164	0.000128455	0.000973993
Hspg2	954.872	-0.89028	0.247067	0.000129009	0.000977644
Anxa7	151.134	-0.921661	0.25688	0.000130314	0.000986975
Mbd3	196.773	0.862081	0.238387	0.000130444	0.000987405
Lmcd1	95.9067	-1.25201	0.363673	0.000131033	0.000990942
Ncbp2	103.154	1.01014	0.283767	0.000131058	0.000990942
Hmmr	19.9346	1.78684	0.538342	0.000131523	0.0009939
Gxylt2	100.711	1.36674	0.398416	0.000132483	0.00100059
Adgrf5	509.263	-2.17269	0.691705	0.000132904	0.00100322
Synm	34.9642	-1.47535	0.440237	0.000133824	0.00100959
Nepn	15.2092	-2.4179	0.771789	0.000135138	0.00101893
Cd300a	18.164	-2.03625	0.624841	0.000135418	0.00102047
Gas2	37.8734	1.33943	0.393927	0.000135496	0.00102049
Tonsl	12.4282	2.12834	0.660696	0.000136654	0.00102864
Hist3h2a	29.8667	-1.51047	0.45283	0.00013826	0.00103985
Txnl1	305.583	0.787292	0.216619	0.000138298	0.00103985
Marf1	56.2657	-1.16065	0.334142	0.000139438	0.00104784
Sh3rf1	34.975	-1.38905	0.410809	0.000140126	0.00105243
Bub1	17.5302	1.85095	0.563667	0.000140491	0.00105459
Mrps17	161.225	0.857505	0.238127	0.000140855	0.00105673
Ssh2	104.845	-1.19566	0.34727	0.000141089	0.00105789
Eef1b2	2676.07	0.872353	0.243724	0.000141412	0.00105973
Mrc1	22.5991	-1.7764	0.54176	0.000141523	0.00105997
Sema4c	70.6003	-1.17728	0.34146	0.000142055	0.00106336
Nr2f2	108.323	-1.02588	0.290545	0.000142406	0.0010654
Naa50	223.825	0.881183	0.24519	0.000142686	0.0010669
Eif4e	188.47	0.85962	0.238872	0.000143225	0.00107034
Ier3ip1	377.575	0.846566	0.235179	0.00014401	0.00107561
Atox1	911.717	-0.925967	0.260292	0.00014412	0.00107584
Dnajc1	217.523	0.840811	0.233671	0.000144921	0.00108122
Rnf144b	16.0379	-1.96978	0.608893	0.00014507	0.00108173
Lrrc32	48.6323	-1.27725	0.374728	0.000147192	0.00109694
Sp110	31.0987	-1.43382	0.42794	0.000148071	0.00110288
Wdr35	15.0851	2.07308	0.632705	0.000148772	0.0011075
Pamr1	82.1402	1.48577	0.442053	0.000149083	0.0011092
Thsd1	28.0232	-1.49317	0.445537	0.00014931	0.00111028
Dgkz	69.8322	-1.15458	0.335327	0.000149695	0.00111253
Gnaq	114.114	-0.997862	0.283131	0.000150658	0.00111907
Lrig1	29.5646	1.4313	0.424919	0.000150976	0.00112043
Sowahc	38.9518	-1.31069	0.385278	0.000151007	0.00112043
Barx2	8.23818	2.75478	0.864062	0.000152105	0.00112795
Gprc5b	54.6091	-1.25587	0.369306	0.000152567	0.00113075
Ssbp2	36.4599	1.53225	0.456598	0.000152737	0.00113139
Jarid2	59.7277	-1.24531	0.363332	0.000153515	0.00113654
Relch	31.9892	-1.38634	0.411956	0.000155218	0.00114851
Has2os	6.91037	3.47211	1.09753	0.000156701	0.00115885
Cnn2	373.656	0.813859	0.226652	0.000157846	0.00116668
Col3a1	8014.41	2.25758	0.727894	0.000158242	0.00116896
Vcan	265.891	2.46071	0.806317	0.000158938	0.00117346
Ptrh2	63.3028	1.10673	0.321079	0.000159138	0.0011743
Chsy3	29.8597	1.69165	0.511695	0.000159597	0.00117704
Oaz2	187.496	-0.943108	0.267796	0.00016042	0.00118246
Ccdc85a	64.6791	-3.01798	1.03563	0.000161633	0.00119075
Tes	59.1571	-1.14782	0.333442	0.000162786	0.00119859
Tmem51	15.5228	-2.14442	0.677437	0.000163597	0.00120338
Gpr135	8.98035	2.60795	0.816806	0.000163614	0.00120338
Ktn1	230.072	-0.927515	0.263603	0.000164336	0.00120803
Sptan1	388.676	-0.94106	0.268033	0.000166122	0.00122002
Mindy1	64.899	-1.09689	0.31813	0.000166148	0.00122002
Scx	97.3443	3.1139	1.0541	0.000166595	0.00122264
Mcm2	86.2755	1.05486	0.304043	0.000166791	0.00122341
Rnf44	46.1267	-1.27674	0.379241	0.000168318	0.00123393
Gng8	9.9737	2.58962	0.805581	0.000168643	0.00123541
Socs3	492.236	-0.953581	0.272109	0.000168702	0.00123541
Mpp6	92.4083	0.98864	0.282117	0.000168895	0.00123615
Bcam	172.41	-2.51139	0.840711	0.000168989	0.00123617
Schip1	64.7333	-1.08516	0.314406	0.000170623	0.00124745
Tafa5	7.23048	3.06895	0.95995	0.000171208	0.00125104
Syk	22.7504	-1.59276	0.486755	0.000171852	0.00125507
Flt1	706.379	-2.17552	0.714183	0.000172663	0.00126031
Kif20b	24.1383	1.51717	0.460699	0.000172884	0.00126124
Stat2	41.2263	-1.38011	0.41687	0.000173564	0.00126551
Crebrf	45.1696	-1.24757	0.369269	0.00017437	0.00127071
Pla2g7	18.7028	-2.07021	0.653551	0.000174976	0.00127444
Fam110b	24.5451	1.54722	0.470981	0.000175432	0.00127583
Ric1	78.3227	-1.03877	0.300565	0.000175433	0.00127583
Kif11	17.4448	1.80575	0.560795	0.000175451	0.00127583
Cdca3	23.7321	1.58693	0.483202	0.000177075	0.00128694
Ak5	6.17904	3.89889	1.22364	0.000177579	0.00128991
Aldh3a2	39.7145	-1.32598	0.39744	0.000178732	0.00129759
Znrd2	101.904	1.01797	0.294828	0.00017965	0.00130355
Prrc1	133.637	1.03875	0.29934	0.000180139	0.0013064
Stard4	70.6602	-1.10446	0.32327	0.000180766	0.00131024
Rgcc	724.555	-1.04218	0.30276	0.000181273	0.00131321
Brip1	16.4091	1.81724	0.570264	0.000183038	0.00132464
Mis18bp1	12.3572	2.05381	0.664646	0.000183047	0.00132464
Slc11a1	10.7719	-2.60477	0.826812	0.000183269	0.00132553
Etv3	43.2615	-1.3289	0.398512	0.000183688	0.00132785
Kcnk2	11.7509	2.12619	0.671529	0.000183925	0.00132885
Htra2	69.6872	1.03767	0.300998	0.000184961	0.00133562
Mrps26	155.328	0.851032	0.241082	0.00018632	0.00134471
Uxs1	76.9774	1.06819	0.310811	0.000187016	0.00134902
Trim12c	42.0868	-1.31244	0.395458	0.000188539	0.00135927
Rab15	10.8178	2.32701	0.731141	0.000188657	0.0013594
Hspb1	1225.27	-1.16486	0.345316	0.000190968	0.0013751
Meox2	182.097	-0.914959	0.26245	0.00019104	0.0013751
Slc1a4	17.563	1.78635	0.552845	0.000191433	0.00137719
Ldlrad4	63.4373	1.12794	0.330318	0.000195037	0.00140238
Zscan26	51.466	-1.14916	0.339828	0.000195737	0.00140666
Rbms2	105.424	0.949083	0.273232	0.00019674	0.00141275
Kmt2d	60.2857	-1.25002	0.375202	0.000196794	0.00141275
Gm41724	9.55511	2.63704	0.835352	0.000197622	0.00141794
Cyyr1	240.002	-2.47271	0.8399	0.000197845	0.00141878
Zmynd19	42.937	1.2511	0.377495	0.000198558	0.00142314
Sema6c	14.0986	2.02035	0.635816	0.000199557	0.00142954
Svbp	306.067	0.838055	0.238323	0.000200464	0.00143528
Itga3	17.3155	-2.01669	0.652834	0.000201647	0.00144147
Eny2	345.129	0.786068	0.22226	0.00020165	0.00144147
Pdxp	10.9221	2.15853	0.692175	0.000201444	0.00144147
Sec13	220.039	0.871199	0.24903	0.000201897	0.00144248
Psme2b	11.6548	-2.43239	0.791463	0.000204689	0.00146165
Col1a2	8885.59	2.40868	0.811139	0.000208856	0.00149062
Sfxn1	90.8163	1.00731	0.293908	0.000209172	0.00149208
Sorcs2	60.7439	2.74045	0.935502	0.000209545	0.00149395
Tnfrsf11b	7.90688	3.05888	0.966536	0.000210861	0.00150254
Sox9	99.7144	1.41739	0.433598	0.000211009	0.0015028
Egr2	52.6413	1.39091	0.421198	0.000211685	0.00150682
Cfb	52.4789	1.18941	0.354501	0.000211946	0.00150788
Cdc42se2	78.8856	-1.03258	0.30308	0.00021262	0.00151187
Inpp4b	15.3205	-2.1932	0.706239	0.000213378	0.00151647
Fam124b	4.44582	-5.09121	2.55596	0.000213673	0.00151777
Slc12a2	85.7733	-0.996569	0.291694	0.000215587	0.00153056
Lrp5	54.7454	-1.25511	0.3799	0.000217522	0.00154348
Oip5os1	266.395	-0.98227	0.287443	0.00021794	0.00154563
Bace1	61.5207	1.15202	0.341345	0.000219724	0.00155747
Tk1	59.0717	1.28855	0.390927	0.00022231	0.00157497
Copg1	145.358	0.898302	0.259511	0.000222547	0.00157582
Osr2	27.9596	1.67174	0.522379	0.000222882	0.00157736
Atp13a2	23.4217	-1.71566	0.5437	0.000225189	0.0015918
Ran	803.566	0.713069	0.201454	0.000225388	0.0015918
Plat	121.35	0.967773	0.281557	0.000225512	0.0015918
Kif15	17.7844	1.72504	0.548425	0.000225421	0.0015918
Ifrd1	303.091	1.00275	0.293613	0.000225267	0.0015918
Sat2	21.223	1.58228	0.502267	0.000226505	0.00159798
Apln	172.183	-1.09796	0.32765	0.000227	0.00160063
Nbas	42.106	1.20521	0.361939	0.00022767	0.00160452
Creb5	93.1271	1.16294	0.346899	0.000228298	0.0016081
Clic5	281.065	-2.42584	0.835126	0.000229308	0.00161437
Nme4	22.1033	1.58328	0.493445	0.000231177	0.00162668
Fcho2	130.128	-1.07873	0.321927	0.000232976	0.00163849
Pkmyt1	21.4139	1.72444	0.550774	0.0002335	0.00164131
Sspn	49.9047	1.30536	0.395634	0.000234345	0.00164639
Clca2	14.1227	-2.07793	0.679709	0.000235522	0.00165294
Rrp1b	39.4956	1.20754	0.365779	0.000235517	0.00165294
Hbegf	253.789	0.826748	0.237422	0.000236269	0.00165733
Ptgs2	212.291	2.32259	0.787759	0.000237812	0.00166728
Plod3	134.17	0.905097	0.263773	0.000239565	0.0016787
Rhou	11.7456	2.33956	0.749429	0.000239724	0.00167894
Tram1l1	4.73161	4.31355	1.52934	0.000239972	0.0016798
Tnmd	118.148	2.8847	1.01421	0.000240594	0.00168328
Ctnnd1	171.695	-0.944024	0.27656	0.00024075	0.0016835
Trim56	51.8689	-1.29496	0.399854	0.000241674	0.00168909
Smc4	180.7	0.824466	0.237553	0.000243834	0.0017031
Enpp3	33.3524	-1.3212	0.405777	0.000243932	0.0017031
Aimp2	66.7451	1.0438	0.310841	0.000245793	0.00171521
Dhh	10.1594	-2.49614	0.814587	0.000246545	0.00171957
Rgs2	75.1601	-1.0778	0.321357	0.000247076	0.00172238
Oscp1	9.98625	2.21912	0.741438	0.000247611	0.00172522
Tet3	88.4204	-0.991959	0.292957	0.000248691	0.00173185
Jpt2	57.5427	1.08889	0.326695	0.000249084	0.00173369
Apod	96.7856	1.2206	0.369159	0.000250141	0.00174015
Ncoa7	134.135	-0.968543	0.286171	0.000251818	0.00175001
Hoxb6	10.9338	-2.37755	0.781123	0.000251703	0.00175001
Inka2	8.40353	-3.65148	1.1417	0.000252694	0.00175519
Mcm6	152.165	0.905659	0.265429	0.000253502	0.0017593
Lbr	109.393	-1.05057	0.314072	0.000253546	0.0017593
N4bp1	88.0759	-1.06637	0.319714	0.000254687	0.00176631
Tbc1d22a	32.4986	-1.33411	0.411724	0.000255674	0.00177225
Klhl22	48.2116	1.16197	0.350353	0.000256379	0.00177622
Cda	48.785	-1.19648	0.363034	0.000257074	0.00178012
Bhlhb9	24.3083	1.48893	0.467599	0.000257544	0.00178246
Slfn3	8.55013	-3.65612	1.14971	0.000257694	0.00178258
Plce1	34.7974	1.38409	0.426081	0.000259713	0.00179563
Lmtk2	17.4975	-1.77431	0.568656	0.000260053	0.00179706
Id1	470.859	-0.928728	0.273383	0.000260566	0.00179968
Jun	2627.31	0.718016	0.205236	0.000260798	0.00180036
Erap1	54.3513	-1.09768	0.330293	0.000261523	0.00180444
Cmtm7	126.57	1.03082	0.307654	0.000262847	0.00181265
Mrps7	155.848	0.83675	0.243614	0.000266572	0.0018374
Scd1	35.065	1.28958	0.396569	0.000268921	0.00185264
Ccdc136	8.60376	2.50358	0.826327	0.000272023	0.00187223
Fxn	45.0483	1.21957	0.376292	0.000272042	0.00187223
Mettl1	78.4353	0.98602	0.293717	0.000274699	0.00188955
Cd247	10.9981	-2.35042	0.78316	0.000275287	0.00189198
Fam20a	32.0109	1.31261	0.406034	0.000275332	0.00189198
Mrpl54	248.951	0.855676	0.250569	0.000278774	0.00191465
Tprgl	228.812	-0.896148	0.264455	0.000280776	0.00192743
Ifih1	44.1517	-1.22849	0.377978	0.000283093	0.00194214
Anapc15	64.8752	1.03239	0.310499	0.000283352	0.00194214
Dcbld1	34.5345	-1.42508	0.452707	0.000283293	0.00194214
Dennd5a	151.047	-0.888061	0.261651	0.000285285	0.0019544
Stk32c	11.3496	-2.25741	0.747452	0.000286071	0.00195879
Serpini1	9.20393	-2.85584	0.948248	0.000287223	0.00196568
Slc8b1	19.4118	-1.6974	0.552137	0.000287457	0.00196628
Lefty1	14.4982	1.85902	0.612906	0.000289427	0.00197876
Hspa1a	129.148	-1.42352	0.45366	0.000289789	0.00198022
Smarca1	18.1082	1.83413	0.595485	0.000290319	0.00198284
Zpr1	64.7464	1.02886	0.309613	0.00029089	0.00198574
Gemin6	35.6423	1.22986	0.379674	0.000291682	0.00199014
Cd48	10.6764	-2.42457	0.800051	0.000293927	0.00200241
Tm4sf1	1650.84	-0.714275	0.206322	0.000293872	0.00200241
Guk1	206.415	0.872859	0.256946	0.000293833	0.00200241
Dnm3os	42.1193	1.50372	0.474561	0.000294117	0.0020027
Slc1a6	4.68949	4.2643	1.55024	0.000295006	0.00200774
Helz2	45.5709	-1.17633	0.361823	0.000295488	0.00200922
Srpr	232.618	0.837619	0.245708	0.000295522	0.00200922
Acbd3	219.477	0.803878	0.234936	0.00029686	0.0020173
Hikeshi	145.318	0.86315	0.254484	0.000297948	0.00202367
Epb41l3	26.492	1.47722	0.466421	0.000299111	0.00203055
Triobp	87.5496	-1.00776	0.304101	0.000299664	0.00203329
Vamp3	169.138	-0.878987	0.260269	0.000300031	0.00203475
H1f0	196.829	-0.966618	0.289381	0.000300183	0.00203476
Rnpep	74.3545	-1.00238	0.30166	0.000300353	0.00203489
Arhgap11a	21.3682	1.52603	0.486033	0.00030111	0.00203899
Mgmt	41.7847	-1.18764	0.366188	0.000301276	0.00203909
Tbx18	18.9894	1.72086	0.552628	0.00030154	0.00203985
Gm29686	6.32226	3.27676	1.11776	0.000303405	0.00205145
Josd2	97.8431	0.920833	0.273325	0.000304421	0.00205728
Cxcl3	9.2913	3.11414	1.03617	0.000306741	0.00206983
Zfyve21	53.7561	1.1488	0.352073	0.000306892	0.00206983
Mc5r	7.7229	2.55207	0.866847	0.000306794	0.00206983
[truncated: 11,760 more rows]
