# Supplementary material for: Single-Cell Transcriptomics Highlights Macrophage-Driven Regulation of EndMT and Repair in Injured Muscle
Source: Research Square preprint supplement (doi:10.21203/rs.3.rs-6288736/v1), 2025-04-24
Supplement: Supplementary file 3 [file a8ceb87ca27cdc34af9ad4a7.xlsx]

## Sheet: GO_BP
ID	Description	setSize	enrichmentScore	NES	pvalue	p.adjust	qvalue	rank	leading_edge	core_enrichment
GO:0030199	collagen fibril organization	59	0.769715	2.50817	1e-10	1e-10	1.08947e-08	1677	tags=69%, list=12%, signal=61%	Lox/Sfrp2/Comp/Col11a1/Lmx1b/Loxl3/Efemp2/Scx/P3h1/Col5a1/Loxl1/Zfp469/Aebp1/Col27a1/Loxl2/Cyp1b1/Col1a1/Col5a2/Col6a1/Adamts2/Col1a2/Dpt/Col14a1/Col3a1/Emilin1/P3h4/Fkbp10/P4ha1/Adamts14/Acan/Chadl/Serpinh1/Colgalt1/Tgfb2/Crtap/Mia3/Ext1/Adamts12/Mkx/Plod3/Ddr2
GO:0035456	response to interferon-beta	57	-0.739648	-2.39532	1e-10	1e-10	1.08947e-08	1538	tags=58%, list=11%, signal=52%	Ifi206/Ifitm1/Gm11772/Ifitm3/Ifi207/Irf1/Mndal/Bst2/Stat1/Irgm2/Ifi209/Oas1a/Igtp/F830016B08Rik/Ifi203/Ifi47/Trim6/Xaf1/Gbp2/Irgm1/Tgtp1/Gbp3/Aim2/9930111J21Rik1/Gbp7/Ifi213/Gm4841/Iigp1/Gbp6/Ifit3/Ifi208/Tgtp2/Ifit1
GO:0006261	DNA-templated DNA replication	140	0.621776	2.29484	1e-10	1e-10	1.08947e-08	2314	tags=48%, list=17%, signal=40%	Brca1/Ccne2/Mcm10/Ccne1/Rad51/Gins2/Tonsl/E2f8/Orc1/Ticrr/Cdc45/Dscc1/Blm/Mms22l/Fgfr1/Rfc4/Fancm/Rrm1/Traip/Atad5/Gins3/Endog/Chtf18/Cenps/Mcm4/Donson/Recql4/Gen1/Wdhd1/Rfc1/Tk1/Rfc5/Bard1/Pole3/Rfc2/Mcm5/Orc2/Lig1/Mcm7/Brca2/Rfc3/Prim1/Helb/Mcm2/Prim2/Zpr1/Mcm3/Fbxo5/Carm1/Pole/Pold1/Mcm6/Cdc6/Pcna/Gins4/Gins1/Pold2/Pole4/Polq/Cdc7/Cdt1/Eme1/Ooep/Topbp1/Pola1/Nucks1/Rbbp8
GO:0050851	antigen receptor-mediated signaling pathway	128	-0.615858	-2.24438	1e-10	1e-10	1.08947e-08	2429	tags=49%, list=18%, signal=41%	Rbck1/Gata3/Lck/Rftn1/Rnf31/Zc3h12a/Sos1/Rc3h1/Lilrb4a/Lgals3/Fosl2/Blnk/Usp12/Fyn/Pawr/Plcg1/Lpxn/Wnk1/Nckap1l/Slc39a10/Nras/Ubash3a/Ptprc/Pde4b/Plcg2/Lipa/Nfam1/Stap1/Cd2ap/Lat2/Dgkz/Btnl9/Plekha1/Elf1/Nectin2/Dusp22/Nfkbid/H2-K1/Dusp3/Syk/H2-D1/Prkd2/Bcl2a1d/Ptpn6/Lyn/Laptm5/Cd300a/Tec/Mef2c/Lcp2/Klhl6/Prkcb/H2-Q4/Cd247/H2-Q7/Prkch/Tnfrsf21/H2-Q6/Icosl/Themis2/Cd38/Ighm/Ccr7
GO:0002429	immune response-activating cell surface receptor signaling pathway	208	-0.571783	-2.22615	1e-10	1e-10	1.08947e-08	2954	tags=48%, list=21%, signal=38%	Cd47/Mapk1/Ptpn22/Bcar1/Itgam/Card11/Tirap/Bcl2/Tnip2/Cd81/Rap1a/Nr1d1/Clec4n/Rbck1/Gata3/Lck/Irak2/Rftn1/Rnf31/Zc3h12a/Sos1/Rc3h1/Lilrb4a/Znrf1/Lgals3/Fosl2/Blnk/Myo1g/Tbk1/Usp12/Fyn/Pawr/Plcg1/Tlr4/Lpxn/Tlr1/Wnk1/Nckap1l/Ly96/Slc39a10/Nras/Ubash3a/Ptprc/Pde4b/Plcg2/Lipa/Tnip3/Nfam1/Stap1/Cd2ap/Lat2/Dgkz/Dab2ip/Btnl9/Tlr2/C5ar1/Plekha1/Elf1/Nmi/Rapgef1/Nectin2/Dusp22/Nfkbid/H2-K1/Cd14/Dusp3/Syk/…
GO:0002768	immune response-regulating cell surface receptor signaling pathway	213	-0.572312	-2.22442	1e-10	1e-10	1.08947e-08	2954	tags=47%, list=21%, signal=38%	Cd47/Mapk1/Ptpn22/Bcar1/Itgam/Card11/Tirap/Bcl2/Tnip2/Cd81/Rap1a/Nr1d1/Clec4n/Rbck1/Gata3/Lck/Irak2/Rftn1/Rnf31/Zc3h12a/Sos1/Rc3h1/Lilrb4a/Znrf1/Lgals3/Fosl2/Blnk/Myo1g/Tbk1/Usp12/Fyn/Pawr/Plcg1/Tlr4/Lpxn/Tlr1/Wnk1/Nckap1l/Ly96/Slc39a10/Nras/Ubash3a/Ptprc/Pde4b/Plcg2/Lipa/Tnip3/Nfam1/Stap1/Cd2ap/Lat2/Cd40/Dgkz/Dab2ip/Btnl9/Tlr2/C5ar1/Plekha1/Elf1/Nmi/Rapgef1/Nectin2/Dusp22/Nfkbid/H2-K1/Cd14/Dusp3…
GO:0002764	immune response-regulating signaling pathway	367	-0.533961	-2.19879	1e-10	1e-10	1.08947e-08	2369	tags=44%, list=17%, signal=38%	Cd47/Slc15a2/Mapk1/Esr1/Ptpn22/Arrb2/Bcar1/Itgam/Fbxl2/Card11/Tirap/Bcl2/Tnip2/Cd81/Nfkbil1/Zc3hav1/Mavs/Rap1a/Traf3ip3/Pum2/Nr1d1/Clec4n/Rbck1/Casp1/Gata3/Lck/Ddx3x/Irak2/Rftn1/Casp4/Rnf31/Becn1/Zc3h12a/Sos1/Rc3h1/Lilrb4a/Znrf1/Lgals3/Fosl2/Mark4/Eif2ak2/Blnk/Trim11/Myo1g/Tbk1/Dhx58/Epg5/Sec14l1/Lrch4/Tlr7/Usp12/Fyn/Pawr/Plcg1/Tlr4/Otud4/Atat1/Tnf/Lpxn/Tlr1/Wnk1/Nckap1l/Ly96/Zdhhc18/Slc39a10/Nra…
GO:0002757	immune response-activating signaling pathway	361	-0.533745	-2.19061	1e-10	1e-10	1.08947e-08	2954	tags=44%, list=21%, signal=36%	Cd47/Slc15a2/Mapk1/Esr1/Ptpn22/Arrb2/Bcar1/Itgam/Fbxl2/Card11/Tirap/Bcl2/Tnip2/Cd81/Nfkbil1/Zc3hav1/Mavs/Rap1a/Traf3ip3/Pum2/Nr1d1/Clec4n/Rbck1/Casp1/Gata3/Lck/Ddx3x/Irak2/Rftn1/Casp4/Rnf31/Becn1/Zc3h12a/Sos1/Rc3h1/Lilrb4a/Znrf1/Lgals3/Fosl2/Mark4/Eif2ak2/Blnk/Trim11/Myo1g/Tbk1/Dhx58/Epg5/Sec14l1/Lrch4/Tlr7/Usp12/Fyn/Pawr/Plcg1/Tlr4/Otud4/Atat1/Tnf/Lpxn/Tlr1/Wnk1/Nckap1l/Ly96/Zdhhc18/Slc39a10/Nra…
GO:0007059	chromosome segregation	360	0.52972	2.18302	1e-10	1e-10	1.08947e-08	3003	tags=42%, list=22%, signal=34%	Cenph/Cdca5/Gpsm2/Brca1/Stil/Knl1/Ube2c/Cenpk/Mybl2/4930447C04Rik/Ccne2/Prc1/Kif14/Ttk/Ccne1/Cenpm/Tubg2/Cenpn/Aspm/Nek2/Esco2/Top2a/Spdl1/Spc25/Spc24/M1ap/Birc5/Ska1/Cenpu/Ncapg2/Trip13/Ska3/Bub1/Ncapg/Brip1/Kif11/Uhrf1/Cdk1/Cenpq/Rcc1/Sgo1/Psmc3ip/Incenp/Cenpw/Spag5/Tacc3/Diaph3/Ect2/Cdca8/Cenpi/Rad18/Dsn1/Chtf18/Cenps/Haus6/Aurkb/Plk1/Tpx2/Dlgap5/Kifc1/Ndc80/Gen1/Bcl7c/Cdca2/Zwilch/Kif4/Smc2/N…
GO:0050776	regulation of immune response	662	-0.493102	-2.13453	1e-10	1e-10	1.08947e-08	2291	tags=36%, list=17%, signal=31%	Ddx3x/Irak2/Rftn1/Abr/Casp4/Rnf31/Stat5b/Becn1/Zc3h12a/Cfp/Sos1/Rc3h1/H2-Ob/Lilrb4a/Tyk2/Stx7/Jak2/Bcr/Znrf1/Lgals3/Fosl2/Dnase2a/Mark4/Cd59a/Sash3/Casp8/Eif2ak2/Blnk/Trim11/Adam8/H2-T22/Nlrp10/Myo1g/Tbk1/Dhx58/Epg5/Masp1/Sec14l1/Lrch4/Tlr7/Usp12/Fyn/Pawr/Plcg1/Tlr4/Otud4/Samhd1/Atat1/Tnf/Lpxn/Tlr1/Cd24a/Wnk1/H2-Eb1/Raet1e/Nckap1l/Ly96/Sppl2a/Zdhhc18/Tap2/Slc39a10/Nras/Lgals9/Nlrp3/Tgfb1/Ubash3a/…
GO:0002253	activation of immune response	407	-0.512576	-2.13185	1e-10	1e-10	1.08947e-08	2369	tags=38%, list=17%, signal=32%	Casp1/Gata3/Lck/Ddx3x/Irak2/Rftn1/Casp4/Rnf31/Becn1/Zc3h12a/Cfp/Sos1/Rc3h1/Lilrb4a/Znrf1/Lgals3/Fosl2/Mark4/Cd59a/Eif2ak2/Blnk/Trim11/Nlrp10/Myo1g/Tbk1/Dhx58/Epg5/Masp1/Sec14l1/Lrch4/Tlr7/Usp12/Fyn/Pawr/Plcg1/Tlr4/Otud4/Atat1/Tnf/Lpxn/Tlr1/Wnk1/Nckap1l/Ly96/Zdhhc18/Slc39a10/Nras/Nlrp3/Ubash3a/Ptprc/Ifi206/Cr1l/Pde4b/Plcg2/Cd86/Nod1/Lipa/Tnip3/Nfam1/Rgcc/Stap1/Unc93b1/Cd2ap/Oasl1/Trim12a/Irf2/Lat2…
GO:0045087	innate immune response	667	-0.491646	-2.13182	1e-10	1e-10	1.08947e-08	2369	tags=34%, list=17%, signal=30%	Casp1/Gata3/Nmb/Cd180/Lck/Mmp12/Kif16b/Flnb/Ddx3x/Irak2/Rftn1/Rnase6/Stxbp2/Casp4/Stat5b/Becn1/Irak4/Cfp/Tmem106a/Tyk2/Jak2/Slk/Znrf1/Lgals3/Fosl2/Mark4/Casp8/Eif2ak2/Trim11/Adam8/H2-T22/Nlrp10/Tbk1/Evl/Dhx58/Epg5/Masp1/Sec14l1/Lrch4/Tlr7/Rab11fip5/Fyn/Tlr4/Otud4/Ciita/Samhd1/Rab27a/Arhgef2/Coro1a/Atat1/Tnf/Clec4a2/Srms/Tlr1/Vamp3/Mid2/Cd24a/H2-Eb1/Ly96/Tnfaip8l2/Zdhhc18/Tap2/Lgals9/Ccl12/Nck1/Nl…
GO:0042742	defense response to bacterium	178	-0.553838	-2.12685	1e-10	1e-10	1.08947e-08	1191	tags=31%, list=9%, signal=29%	Tlr2/Myo1f/C5ar1/Oas2/P2rx7/H2-K1/Il27ra/Irgm2/Syk/B2m/H2-D1/Znfx1/Rnf213/Mpeg1/Epha2/Fcer1g/Il7r/Nod2/Oas1a/Irf8/Igtp/Naip2/Pglyrp1/Isg15/Il1b/Wfdc17/Stab1/Slc30a1/H2-Q4/Lyz2/Gbp2/H2-Q7/Unc13b/Nos2/Cd36/Irgm1/Fcgr1/Slc11a1/Gbp3/Hck/Ncf1/Gbp4/Gbp5/H2-Q6/Gbp7/H2-T23/Mmrn2/Slamf9/Trem2/Aqp1/Gbp9/Iigp1/Gbp6/Ighm/Chga
GO:0051607	defense response to virus	239	-0.537594	-2.126	1e-10	1e-10	1.08947e-08	2074	tags=36%, list=15%, signal=31%	Itgax/Polr3c/Map3k14/Casp1/Nmb/Mmp12/Becn1/Zc3h12a/Eif2ak2/Trim11/Tbk1/Dhx58/Cxcl10/Tlr7/Samhd1/Tnf/Mid2/Nck1/Nlrp3/Irf5/Ptprc/Ifi206/Apobec3/Cd86/Ifitm1/Cd37/Parp9/Unc93b1/Oasl1/Trim12a/Irf2/Ifitm3/Cd40/Ifi207/Ifngr1/Irf1/Rnasel/Ifih1/Mndal/Trim5/Hyal2/Bst2/Stat1/Trim56/Bcl2l1/Trim12c/Stat2/Trim25/Oas2/Il15/Irgm2/Dtx3l/Trim30d/Ifit2/Ifi209/Serinc3/Znfx1/Apobec1/Il10rb/Trim21/Oas1a/Trim34a/Oasl2/…
GO:0050778	positive regulation of immune response	542	-0.496933	-2.11399	1e-10	1e-10	1.08947e-08	2369	tags=37%, list=17%, signal=31%	Casp1/Gata3/Lck/Mmp12/Ddx3x/Irak2/Rftn1/Casp4/Rnf31/Stat5b/Becn1/Zc3h12a/Cfp/Sos1/Rc3h1/H2-Ob/Lilrb4a/Tyk2/Stx7/Jak2/Znrf1/Lgals3/Fosl2/Mark4/Cd59a/Sash3/Eif2ak2/Blnk/Trim11/Adam8/H2-T22/Nlrp10/Myo1g/Tbk1/Dhx58/Epg5/Masp1/Sec14l1/Lrch4/Tlr7/Usp12/Fyn/Pawr/Plcg1/Tlr4/Otud4/Atat1/Tnf/Lpxn/Tlr1/Cd24a/Wnk1/H2-Eb1/Raet1e/Nckap1l/Ly96/Zdhhc18/Tap2/Slc39a10/Nras/Lgals9/Nlrp3/Tgfb1/Ubash3a/Ptprc/Ifi206/C…
GO:0002443	leukocyte mediated immunity	288	-0.525088	-2.10334	1e-10	1e-10	1.08947e-08	2360	tags=41%, list=17%, signal=35%	Gata3/Crlf2/Xrcc4/Swap70/Rftn1/Fes/Stxbp2/Abr/Pld2/Stat5b/Irak4/Lilrb4a/Stx7/Bcr/Fosl2/Sash3/H2-T22/Tcirg1/Myo1g/Kmt2e/Tlr4/Rab27a/Coro1a/Tnf/Cd24a/Csf3r/Raet1e/Nckap1l/Tap2/Tusc2/Lgals9/Cplx2/Nlrp3/Tgfb1/Pou2f2/Tap1/Ptprc/Cr1l/Plcg2/Stap1/Unc93b1/Tnfrsf1b/Lat2/Cd40/Mill2/H2-DMa/Il20rb/Kmt5b/Gata2/Tlr2/Bst2/Myo1f/Il4i1/Jak3/Nectin2/Dusp22/Il21r/P2rx7/H2-K1/Ace/Il27ra/Itgb2/Hfe/Syk/B2m/H2-D1/Cd74/…
GO:0006260	DNA replication	250	0.531029	2.10074	1e-10	1e-10	1.08947e-08	2314	tags=37%, list=17%, signal=31%	Brca1/Mcm8/Pclaf/Ccne2/Mcm10/Ccne1/Rad51/Gins2/Tonsl/E2f8/Esco2/Orc1/Dtl/Ticrr/Cdc45/Rpa2/Dscc1/Blm/Mms22l/Fgfr1/Egfr/Cdk1/Rfc4/Fancm/Chaf1a/Gmnn/Ccna2/Rrm1/Traip/Chaf1b/Atad5/Gins3/Nfix/Endog/Chtf18/Cenps/Mcm4/Nasp/Donson/Fen1/Recql4/Gen1/Wdhd1/Rfc1/Tk1/Rfc5/Bard1/Pole3/Rfc2/Mcm5/Orc2/Lig1/Mcm7/Brca2/Rfc3/Prim1/Helb/Gli2/Mcm2/Prim2/Zpr1/Mcm3/Fbxo5/Carm1/Npm1/Pole/Top1mt/Pold1/Mcm6/Cdc6/Rnaseh2a/…
GO:0098813	nuclear chromosome segregation	266	0.518878	2.07613	1e-10	1e-10	1.08947e-08	2302	tags=34%, list=17%, signal=29%	Cdca5/Knl1/Ube2c/Cenpk/Mybl2/4930447C04Rik/Ccne2/Prc1/Kif14/Ttk/Ccne1/Tubg2/Aspm/Nek2/Top2a/Spdl1/Spc25/Spc24/M1ap/Birc5/Ska1/Ncapg2/Trip13/Ska3/Bub1/Ncapg/Brip1/Kif11/Uhrf1/Cdk1/Cenpq/Sgo1/Psmc3ip/Incenp/Spag5/Tacc3/Ect2/Cdca8/Cenpi/Dsn1/Aurkb/Plk1/Tpx2/Kifc1/Ndc80/Gen1/Bcl7c/Zwilch/Kif4/Smc2/Nuf2/Klhl22/Rangrf/Cenpe/Nek6/Kif22/Smarcc1/Brca2/Fam83d/Cdc16/Anapc15/Dpf1/Ndc1/Ccsap/Espl1/Racgap1/Fbx…
GO:0002250	adaptive immune response	310	-0.512482	-2.07034	1e-10	1e-10	1.08947e-08	2360	tags=41%, list=17%, signal=35%	Gata3/Crlf2/Xrcc4/Swap70/Rftn1/Zc3h12a/Rc3h1/Lilrb4a/Gpr183/Tyk2/Stx7/Jak2/Fosl2/Sash3/Adam17/H2-T22/Tcirg1/Nlrp10/Myo1g/Fyn/Rab27a/Il6ra/Tnf/Mcoln1/Clec4a2/Cd24a/Csf3r/H2-Eb1/Raet1e/Nckap1l/Tap2/Nlrp3/Tgfb1/Pou2f2/Tap1/Ptprc/Cr1l/Cd86/Unc93b1/Tnfrsf13b/Tnfrsf1b/Erap1/Lat2/Cd40/Mill2/Slamf7/H2-DMa/Il20rb/Kmt5b/Irf1/Il4i1/Jak3/Pf4/Pkn1/Nectin2/Dusp22/Nfkbid/Il21r/Orai1/P2rx7/H2-K1/H2-Aa/Rnf125/Il1…
GO:0009615	response to virus	286	-0.510684	-2.04676	1e-10	1e-10	1.08947e-08	2434	tags=34%, list=18%, signal=29%	Itgax/Polr3c/Map3k14/Casp1/Nmb/Mmp12/Ddx3x/Ifi27l2a/Mapk11/Becn1/Zc3h12a/Eif2ak2/Trim11/Tbk1/Dhx58/Cxcl10/Tlr7/Samhd1/Tnf/Mid2/Lgals9/Nck1/Nlrp3/Irf5/Tgfb1/Pou2f2/Ptprc/Ifi206/Apobec3/Cd86/Ifitm1/Cd37/Parp9/Unc93b1/Cd2ap/Oasl1/Trim12a/Gm11772/Irf2/Adar/Ifitm3/Cd40/Ifi207/Ifngr1/Irf1/Rnasel/Ifih1/Mndal/Trim5/Hyal2/Bst2/Stat1/Nmi/Trim56/Bcl2l1/Trim12c/Stat2/Trim25/Oas2/Il15/Irgm2/Dtx3l/Trim30d/Ifit…
GO:0046651	lymphocyte proliferation	237	-0.516754	-2.03874	1e-10	1e-10	1.08947e-08	2235	tags=41%, list=16%, signal=35%	Psmb10/Stat5b/Sos1/Rc3h1/Lilrb4a/Gpr183/Tyk2/Jak2/Lgals3/Fosl2/Dock8/Cd59a/Sash3/Nck2/Efnb1/H2-T22/Msn/Lst1/Fyn/Pawr/Tlr4/Coro1a/Impdh1/Cd24a/Nckap1l/Sos2/Slc39a10/Cd27/Lgals9/Nck1/Tgfb1/Ptprc/Cd86/Lipa/Bmp4/Cd37/Ctnnb1/Il10/Tnfrsf13b/Cxcl12/Tnfrsf1b/Cd40/Il20rb/Irf1/Cd209a/Lrrc32/Il4i1/Jak3/Pkn1/Sh3rf1/Gja1/P2rx7/H2-K1/H2-Aa/Il15/Itgb2/Dock2/Syk/Csf1r/H2-D1/Cd74/Ahr/Rac2/Aif1/Il7r/Lmo1/Ptpn6/Tyr…
GO:0032943	mononuclear cell proliferation	243	-0.513833	-2.03168	1e-10	1e-10	1.08947e-08	2235	tags=41%, list=16%, signal=35%	Psmb10/Stat5b/Sos1/Rc3h1/Lilrb4a/Gpr183/Tyk2/Jak2/Lgals3/Fosl2/Dock8/Cd59a/Sash3/Nck2/Efnb1/H2-T22/Msn/Tbk1/Lst1/Fyn/Pawr/Tlr4/Coro1a/Impdh1/Cd24a/Nckap1l/Sos2/Slc39a10/Cd27/Lgals9/Nck1/Tgfb1/Ptprc/Cd86/Lipa/Bmp4/Cd37/Ctnnb1/Il10/Tnfrsf13b/Cxcl12/Tnfrsf1b/St6gal1/Cd40/Il20rb/Irf1/Cd209a/Lrrc32/Il4i1/Jak3/Bcl2l1/Pkn1/Sh3rf1/Gja1/P2rx7/H2-K1/H2-Aa/Il15/Itgb2/Dock2/Syk/Csf1r/H2-D1/Cd74/Ahr/Rac2/Aif1…
GO:0045088	regulation of innate immune response	360	-0.493026	-2.02317	1e-10	1e-10	1.08947e-08	2316	tags=34%, list=17%, signal=29%	Mmp12/Ddx3x/Irak2/Rftn1/Casp4/Stat5b/Becn1/Znrf1/Mark4/Casp8/Eif2ak2/Trim11/Adam8/H2-T22/Nlrp10/Tbk1/Dhx58/Epg5/Sec14l1/Lrch4/Tlr7/Tlr4/Otud4/Samhd1/Atat1/Tnf/Tlr1/Ly96/Zdhhc18/Tap2/Lgals9/Nlrp3/Tgfb1/Tap1/Ifi206/Plcg2/Cd86/Nod1/Trafd1/Tnip3/Parp9/Unc93b1/N4bp1/Oasl1/Trim12a/Irf2/Adar/Ifi207/Dab2ip/Rps6ka3/Irf1/Ifih1/Mndal/Trim5/Tlr2/Myo1f/Tifa/Nmi/Trim56/Trim12c/Slc15a3/Nop53/Stat2/Trim25/Nectin…
GO:0045089	positive regulation of innate immune response	305	-0.50229	-2.02298	1e-10	1e-10	1.08947e-08	2316	tags=33%, list=17%, signal=28%	Mmp12/Ddx3x/Irak2/Rftn1/Casp4/Stat5b/Becn1/Znrf1/Mark4/Eif2ak2/Trim11/Adam8/H2-T22/Nlrp10/Tbk1/Dhx58/Epg5/Sec14l1/Lrch4/Tlr7/Tlr4/Otud4/Atat1/Tnf/Tlr1/Ly96/Zdhhc18/Lgals9/Nlrp3/Ifi206/Plcg2/Cd86/Nod1/Tnip3/Parp9/Unc93b1/Oasl1/Trim12a/Irf2/Ifi207/Dab2ip/Rps6ka3/Irf1/Ifih1/Mndal/Trim5/Tlr2/Tifa/Nmi/Trim56/Trim12c/Slc15a3/Nop53/Trim25/Nectin2/H2-K1/Cd14/Rnf125/Irgm2/Syk/Trim30d/H2-D1/Cd74/Ifi209/Ifi…
GO:0140546	defense response to symbiont	758	-0.463531	-2.01607	1e-10	1e-10	1.08947e-08	2369	tags=33%, list=17%, signal=29%	Casp1/Gata3/Nmb/Cd180/Lck/Mmp12/Kif16b/Flnb/Ddx3x/Irak2/Rftn1/Rnase6/Stxbp2/Casp4/Stat5b/Becn1/Zc3h12a/Irak4/Cfp/Tmem106a/Tyk2/Jak2/Slk/Znrf1/Lgals3/Fosl2/Mark4/Casp8/Eif2ak2/Trim11/Adam8/H2-T22/Nlrp10/Tbk1/Evl/Dhx58/Epg5/Masp1/Cxcl10/Sec14l1/Lrch4/Tlr7/Rab11fip5/Fyn/Tlr4/Otud4/Ciita/Samhd1/Rab27a/Arhgef2/Coro1a/Atat1/Tnf/Clec4a2/Srms/Tlr1/Vamp3/Mid2/Cd24a/H2-Eb1/Ly96/Tnfaip8l2/Zdhhc18/Tap2/Tusc2…
GO:0070661	leukocyte proliferation	271	-0.502316	-2.00917	1e-10	1e-10	1.08947e-08	2411	tags=43%, list=18%, signal=36%	Ebi3/Il2ra/Ptk2/Nmb/Cd180/Fkbp1a/Psmb10/Stat5b/Sos1/Rc3h1/Lilrb4a/Gpr183/Tyk2/Jak2/Lgals3/Fosl2/Dock8/Cd59a/Sash3/Nck2/Efnb1/H2-T22/Tcirg1/Msn/Tbk1/Lst1/Fyn/Pawr/Tlr4/Coro1a/Impdh1/Cd24a/Nckap1l/Sos2/Slc39a10/Cd27/Lgals9/Ccl12/Nck1/Tgfb1/Ptprc/Cd86/Lipa/Bmp4/Cd37/Ctnnb1/Il10/Tnfrsf13b/Cxcl12/Tnfrsf1b/St6gal1/Cd40/Il20rb/Irf1/Cd209a/Lrrc32/Il4i1/Jak3/Bcl2l1/Enpp3/Pkn1/Sh3rf1/Gja1/Mapk3/P2rx7/H2-K1…
GO:0030198	extracellular matrix organization	258	0.502737	2.00319	1e-10	1e-10	1.08947e-08	1791	tags=38%, list=13%, signal=34%	Col8a2/Col8a1/Lox/Sfrp2/Matn3/Comp/Col11a1/Mfap4/Smoc1/Lmx1b/Ptx3/Mmp23/Ccdc80/Adamts16/Has1/Loxl3/Efemp2/Scx/Tnfrsf11b/P3h1/Col5a1/Col23a1/Loxl1/Abi3bp/Adamtsl1/Zfp469/Aebp1/Col27a1/Col16a1/Has2/Loxl2/Adamtsl2/Cyp1b1/Col1a1/Fn1/Col5a2/Col6a1/Postn/Smoc2/Adamts2/Fbln1/Col1a2/Dpt/Col14a1/Col3a1/Emilin1/Ccn2/Col5a3/Matn2/P3h4/Fkbp10/P4ha1/Pdpn/Adamts14/Col9a2/Scara3/Creb3l1/Acan/Mmp2/Sulf2/Sulf1/Ch…
GO:0043062	extracellular structure organization	258	0.502737	2.00319	1e-10	1e-10	1.08947e-08	1791	tags=38%, list=13%, signal=34%	Col8a2/Col8a1/Lox/Sfrp2/Matn3/Comp/Col11a1/Mfap4/Smoc1/Lmx1b/Ptx3/Mmp23/Ccdc80/Adamts16/Has1/Loxl3/Efemp2/Scx/Tnfrsf11b/P3h1/Col5a1/Col23a1/Loxl1/Abi3bp/Adamtsl1/Zfp469/Aebp1/Col27a1/Col16a1/Has2/Loxl2/Adamtsl2/Cyp1b1/Col1a1/Fn1/Col5a2/Col6a1/Postn/Smoc2/Adamts2/Fbln1/Col1a2/Dpt/Col14a1/Col3a1/Emilin1/Ccn2/Col5a3/Matn2/P3h4/Fkbp10/P4ha1/Pdpn/Adamts14/Col9a2/Scara3/Creb3l1/Acan/Mmp2/Sulf2/Sulf1/Ch…
GO:0045229	external encapsulating structure organization	258	0.502737	2.00319	1e-10	1e-10	1.08947e-08	1791	tags=38%, list=13%, signal=34%	Col8a2/Col8a1/Lox/Sfrp2/Matn3/Comp/Col11a1/Mfap4/Smoc1/Lmx1b/Ptx3/Mmp23/Ccdc80/Adamts16/Has1/Loxl3/Efemp2/Scx/Tnfrsf11b/P3h1/Col5a1/Col23a1/Loxl1/Abi3bp/Adamtsl1/Zfp469/Aebp1/Col27a1/Col16a1/Has2/Loxl2/Adamtsl2/Cyp1b1/Col1a1/Fn1/Col5a2/Col6a1/Postn/Smoc2/Adamts2/Fbln1/Col1a2/Dpt/Col14a1/Col3a1/Emilin1/Ccn2/Col5a3/Matn2/P3h4/Fkbp10/P4ha1/Pdpn/Adamts14/Col9a2/Scara3/Creb3l1/Acan/Mmp2/Sulf2/Sulf1/Ch…
GO:0009617	response to bacterium	467	-0.469027	-1.97683	1e-10	1e-10	1.08947e-08	2284	tags=36%, list=17%, signal=31%	Irak2/Hba-a1/Rnase6/Abr/Casp4/Rnf31/Stat5b/Zc3h12a/Irak4/Cflar/Lilrb4a/Jak2/Bcr/Fosl2/Adam17/Eif2ak2/H2-T22/Nlrp10/Tbk1/Dhx58/Pdcd4/Cxcl10/Tlr4/Tnf/Fbxo3/Tlr1/Lrg1/Casp7/Cd24a/Bmp2/Ly96/Sbno2/Tap2/Tusc2/Lgals9/Sash1/Nlrp3/Irf5/Hmcn1/Slc12a2/Pde4b/Plcg2/Cd86/Nod1/Tnip3/Stap1/Nfib/Il10/Plscr4/Trim12a/Tnfrsf1b/Dab2ip/Herc6/Git1/Rps6ka3/Lpl/Trim5/Tlr2/Myo1f/Stat1/C5ar1/Trim12c/Pf4/Cd52/Mapk3/Sp110/Oa…
GO:0045321	leukocyte activation	739	-0.451513	-1.96307	1e-10	1e-10	1.08947e-08	2381	tags=35%, list=17%, signal=30%	Il2ra/Casp1/Rhoh/Gata3/Crlf2/Cd180/Xrcc4/Lck/Swap70/Fkbp1a/Fes/Stxbp2/Abr/Pld2/Psmb10/Stat5b/Zc3h12a/Sos1/Rc3h1/Tmem106a/H2-Ob/Lilrb4a/Gpr183/Tyk2/Jak2/Bcr/Runx3/Zfp608/Hdac7/Lgals3/Fosl2/Apc/Ep300/Dock8/Cd59a/Sash3/Adam17/Blnk/Adam8/Nck2/Efnb1/H2-T22/Tcirg1/Msn/Tpd52/Lst1/Kmt2e/Fyn/Pawr/Tlr4/Prex1/Skap2/Rab27a/Coro1a/Patz1/Il6ra/Nampt/Tnf/Tlr1/Impdh1/Cd24a/H2-Eb1/Nckap1l/Sbno2/Tnfaip8l2/Psap/Sos…
GO:0002831	regulation of response to biotic stimulus	431	-0.469149	-1.95864	1e-10	1e-10	1.08947e-08	2316	tags=33%, list=17%, signal=28%	Mmp12/Ddx3x/Irak2/Rftn1/Casp4/Rnf31/Stat5b/Becn1/Zc3h12a/Znrf1/Mark4/Casp8/Eif2ak2/Trim11/Adam8/H2-T22/Nlrp10/Tbk1/Dhx58/Epg5/Tigar/Sec14l1/Lrch4/Tlr7/Tlr4/Otud4/Samhd1/Atat1/Tnf/Tlr1/Cd24a/Ly96/Zdhhc18/Tap2/Lgals9/Sash1/Nlrp3/Tgfb1/Tap1/Ifi206/Apobec3/Plcg2/Cd86/Nod1/Trafd1/Tnip3/Cd37/Parp9/Unc93b1/N4bp1/Oasl1/Trim12a/Irf2/Adar/Ifi207/Dab2ip/Rps6ka3/Irf1/Ifih1/Mndal/Trim5/Tlr2/Myo1f/Stat1/Tifa/N…
GO:0002833	positive regulation of response to biotic stimulus	324	-0.48198	-1.95842	1e-10	1e-10	1.08947e-08	2369	tags=34%, list=17%, signal=29%	Casp1/Cd180/Mmp12/Ddx3x/Irak2/Rftn1/Casp4/Stat5b/Becn1/Znrf1/Mark4/Eif2ak2/Trim11/Adam8/H2-T22/Nlrp10/Tbk1/Dhx58/Epg5/Sec14l1/Lrch4/Tlr7/Tlr4/Otud4/Atat1/Tnf/Tlr1/Cd24a/Ly96/Zdhhc18/Lgals9/Sash1/Nlrp3/Ifi206/Plcg2/Cd86/Nod1/Tnip3/Parp9/Unc93b1/Oasl1/Trim12a/Irf2/Ifi207/Dab2ip/Rps6ka3/Irf1/Ifih1/Mndal/Trim5/Tlr2/Tifa/Nmi/Trim56/Trim12c/Slc15a3/Nop53/Trim25/Nectin2/H2-K1/Cd14/Rnf125/Irgm2/Syk/Trim3…
GO:0042110	T cell activation	436	-0.456551	-1.90914	1e-10	1e-10	1.08947e-08	2381	tags=34%, list=17%, signal=29%	Il2ra/Rhoh/Gata3/Xrcc4/Lck/Fkbp1a/Psmb10/Stat5b/Zc3h12a/Sos1/Rc3h1/H2-Ob/Lilrb4a/Gpr183/Tyk2/Jak2/Runx3/Zfp608/Lgals3/Fosl2/Apc/Dock8/Cd59a/Sash3/Adam17/Adam8/Nck2/Efnb1/H2-T22/Tcirg1/Msn/Fyn/Pawr/Prex1/Rab27a/Coro1a/Patz1/Il6ra/Cd24a/H2-Eb1/Nckap1l/Tnfaip8l2/Psap/Sos2/Cdk6/Cd27/Lgals9/Nck1/Nlrp3/Tgfb1/Zmiz1/Ptprc/Cd86/Lipa/Bmp4/Cd37/Mink1/Ctnnb1/Cxcl12/Tnfrsf1b/Slamf7/H2-DMa/Hspb1/Il20rb/Irf1/Cd…
GO:0001501	skeletal system development	431	0.455236	1.90757	1e-10	1e-10	1.08947e-08	1783	tags=30%, list=13%, signal=27%	Vdr/Rbp4/Twist2/Sfrp1/Fst/Lox/Sfrp2/Matn3/Prrx2/Comp/Col11a1/Ccn4/Twist1/Osr1/Tnfsf11/Fbn2/Scx/Bmpr1b/Thbs1/Tmem119/P3h1/Scube2/Fbn1/Ccn3/Shox2/Barx2/Col27a1/Has2/Pth1r/Tnn/Bgn/Ctsk/Enpp1/Loxl2/Pitx1/Col1a1/Mdk/Runx1/Col5a2/Wnt5a/Col6a1/Tbx15/Tgfb3/Vcan/Hoxc8/Prkca/Pkdcc/Col1a2/Ogn/Bnc2/Pcsk5/Evc/Ror2/Alx4/Col3a1/Ccn2/Thbs3/Vkorc1/Mgp/Lrrc17/Ltbp3/Prkg2/Bmpr1a/Frem1/Prrx1/Wnt9a/Serp1/Hoxc10/Fgfr1…
GO:0046649	lymphocyte activation	619	-0.43826	-1.88451	1e-10	1e-10	1.08947e-08	2235	tags=32%, list=16%, signal=28%	Psmb10/Stat5b/Zc3h12a/Sos1/Rc3h1/H2-Ob/Lilrb4a/Gpr183/Tyk2/Jak2/Runx3/Zfp608/Hdac7/Lgals3/Fosl2/Apc/Ep300/Dock8/Cd59a/Sash3/Adam17/Blnk/Adam8/Nck2/Efnb1/H2-T22/Tcirg1/Msn/Tpd52/Lst1/Fyn/Pawr/Tlr4/Prex1/Skap2/Rab27a/Coro1a/Patz1/Il6ra/Impdh1/Cd24a/H2-Eb1/Nckap1l/Tnfaip8l2/Psap/Sos2/Tusc2/Slc39a10/Cdk6/Cd27/Lgals9/Nck1/Nlrp3/Tgfb1/Pou2f2/Zmiz1/Ptprc/Plcg2/Cd86/Lipa/Hdac5/Bmp4/Nfam1/Cd37/Mink1/Ctnnb…
GO:0002252	immune effector process	467	-0.433976	-1.8291	1e-10	1e-10	1.08947e-08	2369	tags=37%, list=17%, signal=32%	Casp1/Gata3/Crlf2/Cd180/Xrcc4/Swap70/Rftn1/Fes/Stxbp2/Abr/Casp4/Pld2/Stat5b/Zc3h12a/Irak4/Cfp/Rc3h1/Lilrb4a/Gpr183/Stx7/Bcr/Lgals3/Fosl2/Cd59a/Sash3/H2-T22/Tcirg1/Plec/Myo1g/Dhx58/Masp1/Tlr7/Kmt2e/Tlr4/Rab27a/Coro1a/Il6ra/Tnf/Cd24a/Csf3r/Raet1e/Nckap1l/Sbno2/Tap2/Tusc2/Cd27/Lgals9/Cplx2/Nlrp3/Irf5/Tgfb1/Pou2f2/Tap1/Ptprc/Cr1l/Plcg2/Cd86/Nod1/Lipa/Rgcc/Stap1/Cd37/Unc93b1/Il10/Tnfrsf1b/Lat2/Cd40/Mi…
GO:0051276	chromosome organization	494	0.42776	1.811	1e-10	1e-10	1.08947e-08	3377	tags=39%, list=25%, signal=30%	Cenph/Cdca5/Mcm8/Knl1/Ube2c/Cenpk/Mybl2/4930447C04Rik/Ccne2/Prc1/Kif14/Ttk/Ccne1/Rad51/Tubg2/Cenpn/Gins2/Nek2/Esco2/Anxa1/Top2a/Spdl1/Cdc45/Rpa2/Dscc1/Spc25/Spc24/Birc5/Ska1/Blm/Ncapg2/Trip13/Ska3/Bub1/Ncapg/Brip1/Kif11/Uhrf1/Cdk1/Sgo1/Psmc3ip/Incenp/Cenpw/Spag5/Tacc3/Cdca8/Gins3/Ezh2/Cenpi/Aurkb/Cip2a/Plk1/Tpx2/Dlgap5/Mcm4/Nasp/Kifc1/Fen1/Recql4/Ndc80/Gen1/Wdhd1/Bcl7c/Xrcc5/Zwilch/Smc2/Nuf2/Klhl…
GO:0002521	leukocyte differentiation	532	-0.420966	-1.78597	1e-10	1e-10	1.08947e-08	2381	tags=33%, list=17%, signal=28%	Il2ra/Rhoh/Gata3/Xrcc4/Lck/Ostm1/Rras/Tjp2/Fes/Stat5b/Zc3h12a/Sos1/Rc3h1/Lilrb4a/Gpr183/Runx3/Zfp608/Hdac7/Fosl2/Apc/Ep300/Sash3/Adam17/Casp8/Adam8/Tcirg1/Nr3c1/Tpd52/Vps54/Tlr4/Prex1/Patz1/Il6ra/Tnf/Tmem178/Cd24a/Nckap1l/Bmp2/Sbno2/Cd109/Psap/Sos2/Tusc2/Cdk6/Cd27/Lgals9/Klf10/Nlrp3/Ccl3/Tgfb1/Pou2f2/Zmiz1/Ptprc/Ifi206/Plcg2/Lipa/Hdac5/Bmp4/Nfam1/Lbr/Mink1/Ctnnb1/Il10/Gpr137b/Fgfr3/Ifi207/Ctnnbip…
GO:0000278	mitotic cell cycle	762	0.383968	1.67191	1e-10	1e-10	1.08947e-08	2503	tags=28%, list=18%, signal=24%	Tubb3/Rbm46/Cdkn2b/Clspn/Cenph/Cdca5/Gpsm2/Brca1/Obsl1/Rrm2/Stil/Knl1/Ube2c/Cenpk/Mybl2/Meis2/Prkca/Ccne2/Smoc2/Prc1/Rhou/Sphk1/Kif14/Ttk/Ccne1/Inhba/Rad51/Tubg2/Tubb2b/Pdxp/Nek2/E2f8/Anxa1/Orc1/Dtl/Spdl1/Ticrr/Pdpn/Cdc45/Rpa2/Cks2/Spc25/Spc24/Cks1b/Birc5/Dact1/Ska1/Blm/Ncapg2/Creb3l1/Fgfr1/Trip13/Ska3/Egfr/Igf1/Bub1/Ncapg/Kif11/Uhrf1/Cdk1/Ccdc8/Hacd1/Rcc1/Pkmyt1/Incenp/Cenpw/Spag5/Tacc3/Ccna2/Rr…
GO:0031349	positive regulation of defense response	398	-0.449169	-1.86124	1.12064e-10	1.12064e-10	1.19113e-08	2316	tags=34%, list=17%, signal=29%	Mmp12/Ddx3x/Irak2/Rftn1/Casp4/Rnf31/Stat5b/Becn1/Znrf1/Mark4/Eif2ak2/Trim11/Adam8/H2-T22/Nlrp10/Tbk1/Dhx58/Epg5/Trpv4/Pdcd4/Sec14l1/Lrch4/Tlr7/Tlr4/Otud4/Atat1/Tnf/Tlr1/Cd24a/Ly96/Zdhhc18/Lgals9/Il16/Nlrp3/Ccl3/Tgfb1/Alox5ap/Ifi206/Plcg2/Cd86/Nod1/Tnip3/Stap1/Parp9/Unc93b1/Oasl1/Trim12a/Irf2/Ifi207/Dab2ip/Rps6ka3/Lpl/Irf1/Ifih1/Mndal/Trim5/Gprc5b/Hyal2/Tlr2/Tifa/Nmi/Trim56/Trim12c/Slc15a3/Nop53/T…
GO:0031347	regulation of defense response	613	-0.398447	-1.71363	2.1167e-10	2.1167e-10	2.19627e-08	2316	tags=31%, list=17%, signal=27%	Mmp12/Nfe2l1/Ddx3x/Irak2/Rftn1/Abr/Casp4/Rnf31/Stat5b/Becn1/Zc3h12a/Jak2/Bcr/Znrf1/Mark4/Casp8/Eif2ak2/Trim11/Adam8/H2-T22/Nlrp10/Tbk1/Dhx58/Epg5/Trpv4/Pdcd4/Sec14l1/Lrch4/Tlr7/Tlr4/Otud4/Samhd1/Atat1/Tnf/Akna/Tlr1/Cd24a/Ly96/Sbno2/Tnfaip8l2/Zdhhc18/Tap2/Socs3/Lgals9/Il16/Nlrp3/Ccl3/Tgfb1/Tap1/Alox5ap/Ifi206/Apobec3/Plcg2/Cd86/Nod1/Trafd1/Tnip3/Stap1/Cd37/Parp9/Unc93b1/N4bp1/Il10/Oasl1/Trim12a/Ir…
GO:1903047	mitotic cell cycle process	662	0.388722	1.6759	3.47602e-10	3.47602e-10	3.52282e-08	2116	tags=26%, list=15%, signal=23%	Cdkn2b/Clspn/Cenph/Cdca5/Gpsm2/Brca1/Obsl1/Rrm2/Stil/Knl1/Ube2c/Cenpk/Mybl2/Ccne2/Prc1/Rhou/Sphk1/Kif14/Ttk/Ccne1/Inhba/Rad51/Tubg2/Pdxp/Nek2/Anxa1/Orc1/Dtl/Spdl1/Ticrr/Pdpn/Cdc45/Rpa2/Cks2/Spc25/Spc24/Cks1b/Birc5/Dact1/Ska1/Blm/Ncapg2/Creb3l1/Fgfr1/Trip13/Ska3/Egfr/Igf1/Bub1/Ncapg/Kif11/Uhrf1/Cdk1/Ccdc8/Hacd1/Rcc1/Pkmyt1/Incenp/Spag5/Tacc3/Ccna2/Rrm1/Ect2/Atad5/Cdca8/Gins3/Nfix/Ezh2/Cenpi/Iqgap2…
GO:0000280	nuclear division	351	0.454025	1.8632	3.76436e-10	3.76436e-10	3.72833e-08	2126	tags=30%, list=15%, signal=26%	Rbm46/Lif/Cdca5/Obsl1/Knl1/Ube2c/Cenpk/Wnt5a/Mybl2/4930447C04Rik/Ccne2/Prc1/Sphk1/Kif14/Ttk/Ccne1/Rad51/Tubg2/Aspm/Pdxp/Nek2/Top2a/Spdl1/Cks2/Spc25/Spc24/M1ap/Birc5/Ska1/Ncapg2/Trip13/Ska3/Igf1/Bub1/Ncapg/Brip1/Kif11/Uhrf1/Cdk1/Ccdc8/Rcc1/Sgo1/Psmc3ip/Incenp/Fancm/Spag5/Cdca8/Nfix/Cenpi/Chtf18/Cenps/Dnmt3l/Aurkb/Plk1/Tpx2/Mastl/Suv39h2/Kifc1/Fanca/Ndc80/Gen1/Cdca2/Spire1/Zwilch/Smc2/Nuf2/Klhl22/R…
GO:0051216	cartilage development	176	0.550895	2.08915	4.58469e-10	4.58469e-10	4.39583e-08	1631	tags=37%, list=12%, signal=33%	Sfrp2/Matn3/Prrx2/Comp/Col11a1/Ccn4/Osr1/Scx/Bmpr1b/Thbs1/Scube2/Ccn3/Shox2/Barx2/Col27a1/Pth1r/Bgn/Ctsk/Enpp1/Loxl2/Pitx1/Col1a1/Mdk/Runx1/Wnt5a/Col6a1/Prkca/Pkdcc/Ogn/Ror2/Col3a1/Ccn2/Thbs3/Mgp/Ltbp3/Prkg2/Bmpr1a/Prrx1/Wnt9a/Fgfr1/Acan/Fgf2/Sulf2/Sulf1/Chadl/Csgalnact1/Osr2/Six2/Bmp1/Gli3/Sox9/Serpinh1/Slc39a14/Lnpk/Tgfb2/Mia3/Runx2/Gli2/Ext1/Adamts12/Carm1/Bmp5/Fgf18/Snai1/Mkx
GO:1903046	meiotic cell cycle process	160	0.55813	2.09363	4.64004e-10	4.64004e-10	4.39583e-08	2248	tags=41%, list=16%, signal=35%	Rbm46/Lif/Knl1/Wnt5a/4930447C04Rik/Ccne2/Ttk/Ccne1/Rad51/Tubg2/Aspm/Top2a/Cks2/M1ap/Birc5/Trip13/Brip1/Pkmyt1/Sgo1/Psmc3ip/Incenp/Fancm/Cdc25c/Chtf18/Cenps/Dnmt3l/Plk1/Mastl/Mcm4/Suv39h2/Fanca/Ndc80/Spire1/Smc2/Nuf2/Cenpe/Mcm5/Mcm7/Brca2/Mcm2/Calr/Ndc1/Espl1/Mcm3/Fbxo5/Rad54l/Rad51ap1/Mybl1/Zwint/Fancd2/Mcm6/Ncaph/Rad54b/Smc4/Tubg1/Syce2/Grb14/Atm/Ncapd3/Zcwpw1/Eme1/Ooep/Topbp1/Sgo2a/Ddb1/Tdrkh
GO:0002460	adaptive immune response based on somatic recombination of immune receptors built from immunoglobulin superfamily domains	243	-0.497584	-1.96743	5.80641e-10	5.80641e-10	5.38377e-08	2360	tags=40%, list=17%, signal=34%	Gata3/Crlf2/Xrcc4/Swap70/Rftn1/Zc3h12a/Rc3h1/Lilrb4a/Tyk2/Stx7/Jak2/Fosl2/Sash3/Adam17/H2-T22/Tcirg1/Nlrp10/Myo1g/Rab27a/Il6ra/Tnf/Cd24a/Csf3r/Raet1e/Nckap1l/Tap2/Nlrp3/Tgfb1/Pou2f2/Ptprc/Cr1l/Unc93b1/Tnfrsf1b/Cd40/Mill2/H2-DMa/Il20rb/Kmt5b/Irf1/Il4i1/Jak3/Pf4/Pkn1/Nectin2/Dusp22/Nfkbid/Il21r/P2rx7/H2-K1/Il18bp/Il27ra/Hfe/Notch1/B2m/H2-D1/Cd74/Ahr/Tnfsf13/H2-Ab1/Fcgr3/Fcer1g/Il7r/Nod2/Ptpn6/Pirb/…
GO:1903131	mononuclear cell differentiation	397	-0.44038	-1.8246	7.03933e-10	7.03933e-10	6.39097e-08	2381	tags=32%, list=17%, signal=28%	Il2ra/Rhoh/Gata3/Xrcc4/Lck/Fes/Stat5b/Zc3h12a/Sos1/Rc3h1/Lilrb4a/Gpr183/Runx3/Zfp608/Hdac7/Fosl2/Apc/Ep300/Sash3/Adam17/Adam8/Tcirg1/Tpd52/Prex1/Patz1/Il6ra/Cd24a/Nckap1l/Psap/Sos2/Tusc2/Cdk6/Cd27/Lgals9/Nlrp3/Tgfb1/Pou2f2/Zmiz1/Ptprc/Ifi206/Plcg2/Lipa/Hdac5/Bmp4/Nfam1/Mink1/Ctnnb1/Il10/Ifi207/Ctnnbip1/H2-DMa/Hoxa7/Hspb1/Irf1/Mndal/Fbxo7/Mertk/Il4i1/Jak3/Pf4/Hmga1/Sh3rf1/Cd83/Nfkbid/H2-Aa/Il15/Do…
GO:0070663	regulation of leukocyte proliferation	206	-0.522575	-2.03224	7.42074e-10	7.42074e-10	6.59976e-08	2233	tags=43%, list=16%, signal=36%	Stat5b/Sos1/Rc3h1/Lilrb4a/Gpr183/Tyk2/Jak2/Lgals3/Cd59a/Sash3/Nck2/Efnb1/H2-T22/Lst1/Pawr/Tlr4/Coro1a/Cd24a/Nckap1l/Sos2/Slc39a10/Lgals9/Ccl12/Nck1/Tgfb1/Ptprc/Cd86/Bmp4/Cd37/Ctnnb1/Il10/Tnfrsf13b/Tnfrsf1b/St6gal1/Cd40/Il20rb/Irf1/Cd209a/Lrrc32/Il4i1/Jak3/Bcl2l1/Enpp3/Pkn1/Sh3rf1/Mapk3/H2-K1/H2-Aa/Il15/Syk/Csf1r/H2-D1/Cd74/Ahr/Rac2/Aif1/Lmo1/Ptpn6/Tyrobp/Ceacam1/Lyn/Inpp5d/Flt3l/Bst1/Laptm5/Il1b/…
GO:0002449	lymphocyte mediated immunity	213	-0.517865	-2.01279	1.06226e-09	1.06226e-09	9.1651e-08	2360	tags=40%, list=17%, signal=34%	Gata3/Crlf2/Xrcc4/Swap70/Rftn1/Stat5b/Lilrb4a/Stx7/Fosl2/Sash3/H2-T22/Tcirg1/Myo1g/Rab27a/Coro1a/Tnf/Cd24a/Csf3r/Raet1e/Nckap1l/Tap2/Lgals9/Nlrp3/Tgfb1/Pou2f2/Tap1/Ptprc/Cr1l/Unc93b1/Tnfrsf1b/Cd40/Mill2/H2-DMa/Il20rb/Kmt5b/Il4i1/Nectin2/Dusp22/Il21r/P2rx7/H2-K1/Il27ra/Hfe/B2m/H2-D1/Cd74/Ahr/Tnfsf13/H2-Ab1/Fcgr3/Fcer1g/Il7r/Nod2/Ptpn6/Pirb/Clec2d/Slfn2/Ceacam1/Inpp5d/Il1b/C1qb/C1qa/Fcgr2b/Csf2rb2/…
GO:0006281	DNA repair	535	0.405126	1.72787	1.07258e-09	1.07258e-09	9.1651e-08	3013	tags=31%, list=22%, signal=25%	Usp51/Twist1/Clspn/Cdca5/Brca1/Eya4/Mcm8/Pclaf/4930447C04Rik/Aunip/Rad51/Ung/Gins2/Tonsl/Esco2/Parpbp/Exo1/Dtl/Ticrr/Cdc45/Rpa2/Blm/Mms22l/Trip13/Egfr/Brip1/Uhrf1/Npas2/Rfc4/Fancm/Chaf1a/Rrm1/Traip/Fancf/Eya2/Chaf1b/Rad18/Cenps/Alkbh2/Plk1/Neil3/Mcm4/Fanca/Fen1/Recql4/Gen1/Wdhd1/Rfc1/Bcl7c/Swi5/Rfc5/Spire1/Bard1/Ube2t/Sf3b5/Xrcc5/Smc2/Hmgn1/Rfc2/Mcm5/Taf5/Kif22/Smarcc1/Lig1/Mcm7/Brca2/Mdc1/Usp1/R…
GO:0051249	regulation of lymphocyte activation	390	-0.438725	-1.81577	1.22943e-09	1.22943e-09	1.03033e-07	2233	tags=33%, list=16%, signal=29%	Stat5b/Zc3h12a/Sos1/Rc3h1/H2-Ob/Lilrb4a/Gpr183/Tyk2/Jak2/Runx3/Zfp608/Lgals3/Dock8/Cd59a/Sash3/Adam8/Nck2/Efnb1/H2-T22/Lst1/Pawr/Tlr4/Coro1a/Cd24a/H2-Eb1/Nckap1l/Tnfaip8l2/Sos2/Slc39a10/Cd27/Lgals9/Nck1/Nlrp3/Tgfb1/Zmiz1/Ptprc/Cd86/Bmp4/Nfam1/Cd37/Ctnnb1/Il10/Tnfrsf13b/Tnfrsf1b/Cd40/Slamf7/H2-DMa/Hspb1/Il20rb/Kmt5b/Bloc1s6/Irf1/Cd209a/Lrrc32/Fbxo7/Mertk/Il4i1/Jak3/Adora2a/Pf4/Pkn1/Sh3rf1/Dusp22/E…
GO:0051321	meiotic cell cycle	200	0.52371	2.00771	1.51183e-09	1.51183e-09	1.2431e-07	2491	tags=40%, list=18%, signal=33%	Rbm46/Lif/Knl1/Wnt5a/4930447C04Rik/Ccne2/Ttk/Ccne1/Rad51/Tubg2/Aspm/Nek2/Top2a/Exo1/Cks2/M1ap/Birc5/Trip13/Brip1/Pkmyt1/Sgo1/Psmc3ip/Incenp/Fancm/Cdc25c/Chtf18/Cenps/Dnmt3l/Plk1/Mastl/Mcm4/Suv39h2/Mns1/Fanca/Ndc80/Spire1/Smc2/Nuf2/Cenpe/Mcm5/Utp14b/Mcm7/Brca2/Mki67/Mcm2/Calr/Ndc1/Espl1/Mcm3/Fbxo5/Rad54l/Rad51ap1/Mybl1/Zwint/Fancd2/Mcm6/Ncaph/Rad54b/Rsph1/Smc4/Tubg1/Syce2/Grb14/Atm/Ncapd3/Zcwpw1/E…
GO:0002274	myeloid leukocyte activation	189	-0.528211	-2.04604	1.66073e-09	1.66073e-09	1.34024e-07	2369	tags=43%, list=17%, signal=36%	Casp1/Rhoh/Crlf2/Fes/Stxbp2/Abr/Pld2/Tmem106a/Lilrb4a/Jak2/Bcr/Kmt2e/Tlr4/Nampt/Tnf/Tlr1/Sbno2/Lgals9/Il16/Cplx2/Tgfb1/Ptpre/Plcg2/Stap1/Cd37/Il10/Plpp6/Lat2/Gpr137b/Ifngr1/Gata2/Hyal2/Tlr2/Myo1f/C5ar1/Nmi/Enpp3/Adam10/Nectin2/Tafa3/Il15/Clu/Itgb2/Dock2/Syk/Csf1r/Dysf/Batf3/Ifi35/Rac2/Ptafr/Myo18a/Fcgr3/Tmem229b/Aif1/Spi1/Fcer1g/Ptpn6/Tyrobp/Pirb/Lyn/Flt3l/Pparg/Cd300a/C1qa/Cd84/Adgrf5/Lcp2/Cx3cr…
GO:0002703	regulation of leukocyte mediated immunity	188	-0.530173	-2.05067	1.69839e-09	1.69839e-09	1.34571e-07	2267	tags=42%, list=16%, signal=36%	Fes/Stxbp2/Abr/Pld2/Stat5b/Lilrb4a/Stx7/Bcr/Sash3/H2-T22/Tlr4/Tnf/Cd24a/Raet1e/Nckap1l/Tap2/Lgals9/Nlrp3/Tgfb1/Tap1/Ptprc/Cr1l/Plcg2/Stap1/Tnfrsf1b/Cd40/Mill2/Il20rb/Kmt5b/Gata2/Tlr2/Bst2/Il4i1/Jak3/Nectin2/Dusp22/P2rx7/H2-K1/Il27ra/Itgb2/Hfe/Syk/B2m/H2-D1/Ahr/Tnfsf13/Rac2/Ptafr/Fcgr3/Spi1/Fcer1g/Il7r/Nod2/Ptpn6/Tyrobp/Clec2d/Ceacam1/Lyn/Il1b/Cd300a/Fcgr2b/Cd84/Vsir/H2-Q4/Igf2/Cx3cr1/Tlr3/H2-Q7/H…
GO:0002218	activation of innate immune response	250	-0.493604	-1.95209	2.33706e-09	2.33706e-09	1.81869e-07	2291	tags=33%, list=17%, signal=28%	Ddx3x/Irak2/Rftn1/Casp4/Becn1/Znrf1/Mark4/Eif2ak2/Trim11/Nlrp10/Tbk1/Dhx58/Epg5/Sec14l1/Lrch4/Tlr7/Tlr4/Otud4/Atat1/Tnf/Tlr1/Ly96/Zdhhc18/Nlrp3/Ifi206/Plcg2/Cd86/Nod1/Tnip3/Unc93b1/Oasl1/Trim12a/Irf2/Ifi207/Dab2ip/Rps6ka3/Irf1/Ifih1/Mndal/Trim5/Tlr2/Tifa/Nmi/Trim12c/Slc15a3/Nop53/Trim25/Cd14/Rnf125/Irgm2/Syk/Trim30d/Ifi209/Ifi35/Znfx1/Nod2/Oas1a/Pik3ap1/Tyrobp/Igtp/Ifi203/Lyn/Cd300a/Irf7/Trim30a/…
GO:0050670	regulation of lymphocyte proliferation	184	-0.528813	-2.04174	2.37931e-09	2.37931e-09	1.81908e-07	2233	tags=43%, list=16%, signal=36%	Stat5b/Sos1/Rc3h1/Lilrb4a/Gpr183/Tyk2/Jak2/Lgals3/Cd59a/Sash3/Nck2/Efnb1/H2-T22/Lst1/Pawr/Tlr4/Coro1a/Cd24a/Nckap1l/Sos2/Slc39a10/Lgals9/Nck1/Tgfb1/Ptprc/Cd86/Bmp4/Cd37/Ctnnb1/Il10/Tnfrsf13b/Tnfrsf1b/Cd40/Il20rb/Irf1/Cd209a/Lrrc32/Il4i1/Jak3/Pkn1/Sh3rf1/H2-K1/H2-Aa/Il15/Syk/Csf1r/H2-D1/Cd74/Ahr/Rac2/Aif1/Lmo1/Ptpn6/Tyrobp/Ceacam1/Lyn/Inpp5d/Flt3l/Bst1/Laptm5/Il1b/Cd300a/Fcgr2b/Mef2c/Kitl/Vsir/H2-…
GO:0000070	mitotic sister chromatid segregation	170	0.535083	2.02866	2.88806e-09	2.88806e-09	2.16998e-07	3370	tags=49%, list=24%, signal=37%	Cdca5/Knl1/Ube2c/Cenpk/Mybl2/Prc1/Kif14/Ttk/Tubg2/Nek2/Spdl1/Spc25/Spc24/Birc5/Ska1/Ncapg2/Trip13/Ska3/Bub1/Ncapg/Kif11/Uhrf1/Cdk1/Incenp/Spag5/Cdca8/Cenpi/Aurkb/Plk1/Tpx2/Kifc1/Ndc80/Gen1/Zwilch/Smc2/Nuf2/Klhl22/Rangrf/Cenpe/Kif22/Cdc16/Anapc15/Ccsap/Espl1/Racgap1/Fbxo5/Zwint/Cdk5rap2/Ncaph/Poldip2/Smc4/Tubg1/Cdt1/Atm/Ncapd3/Kif18b/Mis12/Ran/Mad2l1/Kifc5b/Haspin/Kntc1/Kpnb1/Kif2a/Nsmce2/Eml4/Ana…
GO:0002694	regulation of leukocyte activation	444	-0.419476	-1.7526	3.32573e-09	3.32573e-09	2.45647e-07	2233	tags=33%, list=16%, signal=28%	Stat5b/Zc3h12a/Sos1/Rc3h1/H2-Ob/Lilrb4a/Gpr183/Tyk2/Jak2/Runx3/Zfp608/Lgals3/Dock8/Cd59a/Sash3/Adam8/Nck2/Efnb1/H2-T22/Lst1/Pawr/Tlr4/Coro1a/Tnf/Cd24a/H2-Eb1/Nckap1l/Tnfaip8l2/Sos2/Slc39a10/Cd27/Lgals9/Il16/Nck1/Nlrp3/Tgfb1/Zmiz1/Ptprc/Ptpre/Cd86/Bmp4/Nfam1/Stap1/Cd37/Ctnnb1/Il10/Tnfrsf13b/Plpp6/Tnfrsf1b/Gpr137b/Cd40/Slamf7/H2-DMa/Hspb1/Il20rb/Kmt5b/Bloc1s6/Irf1/Cd209a/Lrrc32/Fbxo7/Mertk/Il4i1/Ja…
GO:0032496	response to lipopolysaccharide	230	-0.492162	-1.93653	3.91325e-09	3.91325e-09	2.84225e-07	2284	tags=37%, list=17%, signal=31%	Irak2/Abr/Casp4/Stat5b/Zc3h12a/Irak4/Lilrb4a/Jak2/Bcr/Fosl2/Adam17/Eif2ak2/Pdcd4/Cxcl10/Tlr4/Tnf/Fbxo3/Casp7/Ly96/Sbno2/Lgals9/Sash1/Nlrp3/Slc12a2/Pde4b/Plcg2/Cd86/Tnip3/Stap1/Il10/Plscr4/Trim12a/Tnfrsf1b/Dab2ip/Git1/Rps6ka3/Trim5/Stat1/Trim12c/Pf4/Mapk3/P2rx7/Cd14/Ace/Irgm2/Ncf2/Trim30d/Bmp6/B2m/Tnfrsf11a/Cd68/Ptafr/Gch1/Mrc1/Spi1/Nod2/Irf8/Igtp/Lyn/Il1b/Mef2c/Trim6/Cd84/Trim30a/Cx3cr1/Gbp2/Abca…
GO:0000819	sister chromatid segregation	207	0.508989	1.96542	4.33814e-09	4.33814e-09	3.05969e-07	2104	tags=32%, list=15%, signal=28%	Cdca5/Knl1/Ube2c/Cenpk/Mybl2/Prc1/Kif14/Ttk/Tubg2/Nek2/Top2a/Spdl1/Spc25/Spc24/Birc5/Ska1/Ncapg2/Trip13/Ska3/Bub1/Ncapg/Kif11/Uhrf1/Cdk1/Incenp/Spag5/Tacc3/Cdca8/Cenpi/Aurkb/Plk1/Tpx2/Kifc1/Ndc80/Gen1/Bcl7c/Zwilch/Smc2/Nuf2/Klhl22/Rangrf/Cenpe/Nek6/Kif22/Smarcc1/Cdc16/Anapc15/Dpf1/Ccsap/Espl1/Racgap1/Fbxo5/Zwint/Cdk5rap2/Cdc6/Ncaph/Poldip2/Smc4/Tubg1/Rmi2/Phf10/Cdt1/Atm/Ncapd3/Kif18b/Mis12/Ran
GO:0032944	regulation of mononuclear cell proliferation	188	-0.524064	-2.02704	4.35304e-09	4.35304e-09	3.05969e-07	2233	tags=43%, list=16%, signal=37%	Stat5b/Sos1/Rc3h1/Lilrb4a/Gpr183/Tyk2/Jak2/Lgals3/Cd59a/Sash3/Nck2/Efnb1/H2-T22/Lst1/Pawr/Tlr4/Coro1a/Cd24a/Nckap1l/Sos2/Slc39a10/Lgals9/Nck1/Tgfb1/Ptprc/Cd86/Bmp4/Cd37/Ctnnb1/Il10/Tnfrsf13b/Tnfrsf1b/St6gal1/Cd40/Il20rb/Irf1/Cd209a/Lrrc32/Il4i1/Jak3/Bcl2l1/Pkn1/Sh3rf1/H2-K1/H2-Aa/Il15/Syk/Csf1r/H2-D1/Cd74/Ahr/Rac2/Aif1/Lmo1/Ptpn6/Tyrobp/Ceacam1/Lyn/Inpp5d/Flt3l/Bst1/Laptm5/Il1b/Cd300a/Fcgr2b/Mef2…
GO:0034097	response to cytokine	720	-0.37274	-1.61866	4.73555e-09	4.73555e-09	3.27572e-07	2316	tags=31%, list=17%, signal=27%	Mmp12/Kif16b/Mynn/Flnb/Tjp2/Fkbp1a/Irak2/Stxbp2/Casp4/Rnf31/Stat5b/Mapk11/Zc3h12a/Irak4/Adipor1/Rc3h1/Lilrb4a/Tyk2/Jak2/Slk/Fosl2/Ep300/Dock8/Adipor2/Dusp1/Adam17/Casp8/Eif2ak2/B3gnt2/Ubxn2a/Tcirg1/Bbs4/Tbk1/Evl/Cxcl10/Il1rn/Rab11fip5/Grk2/Tlr4/Otud4/Ciita/Samhd1/Coro1a/Tank/Ldlrap1/Il6ra/Tnf/Dcp1b/Foxc1/Vamp3/Cd24a/Csf3r/Wnk1/H2-Eb1/Insr/Sbno2/Rffl/Socs3/Ccl12/Il16/Adamts7/Ccl3/Irf5/Hipk1/Slc12a…
GO:0035458	cellular response to interferon-beta	49	-0.736239	-2.32124	5.38499e-09	5.38499e-09	3.61114e-07	1538	tags=59%, list=11%, signal=53%	Ifi206/Gm11772/Ifi207/Irf1/Mndal/Stat1/Irgm2/Ifi209/Oas1a/Igtp/F830016B08Rik/Ifi203/Ifi47/Trim6/Gbp2/Irgm1/Tgtp1/Gbp3/Aim2/9930111J21Rik1/Gbp7/Ifi213/Gm4841/Iigp1/Gbp6/Ifit3/Ifi208/Tgtp2/Ifit1
GO:0034341	response to type II interferon	119	-0.58107	-2.10211	5.38618e-09	5.38618e-09	3.61114e-07	2369	tags=46%, list=17%, signal=39%	Casp1/Kif16b/Flnb/Stxbp2/Tyk2/Jak2/Slk/Evl/Rab11fip5/Tlr4/Ciita/Tnf/Vamp3/H2-Eb1/Ccl12/Ccl3/Ifitm1/Parp9/Ifitm3/Ifngr1/Irf1/Tlr2/Bst2/Stat1/H2-Aa/Irgm2/Ccl9/Ccl8/Cd74/H2-Ab1/Cdc42ep2/Gch1/Myo18a/Mrc1/Trim21/Irf8/Igtp/Sp100/Pparg/Gbp2/Nlrc5/H2-Q7/Nos2/Parp14/Irgm1/Tgtp1/Slc11a1/Gbp3/Gbp4/Gbp5/Gbp7/Gbp9/Gbp6/Was/Ccl6
GO:0001816	cytokine production	682	-0.374825	-1.62442	5.65758e-09	5.65758e-09	3.73562e-07	2369	tags=31%, list=17%, signal=27%	Casp1/Gata3/Crlf2/Nmb/Mmp12/Zbtb34/Ddx3x/Rftn1/Frmd8/Casp4/Stat5b/Mapk11/Zc3h12a/Irak4/Tmem106a/Lilrb4a/Tyk2/Jak2/Runx3/Hdac7/Fosl2/Cd59a/Sash3/Adam17/Casp8/Eif2ak2/Adam8/Abcd1/H2-T22/Tcirg1/Nlrp10/Tbk1/Dhx58/Trpv4/Pdcd4/Tlr7/Grk2/Pawr/Tlr4/Arhgef2/Tank/Patz1/Il6ra/Tnf/Tlr1/Cd24a/Nckap1l/Ly96/Tusc2/Nras/Cd27/Lgals9/Il16/Arrdc4/Nlrp3/Ccl3/Irf5/Tgfb1/Pou2f2/Ubash3a/Ptprc/Ifi206/Pde4b/Plcg2/Nod1/Lip…
GO:0042098	T cell proliferation	178	-0.525865	-2.01943	5.77618e-09	5.77618e-09	3.75701e-07	2288	tags=41%, list=17%, signal=35%	Fkbp1a/Psmb10/Stat5b/Sos1/Rc3h1/Lilrb4a/Tyk2/Jak2/Lgals3/Dock8/Cd59a/Sash3/Nck2/Efnb1/H2-T22/Msn/Fyn/Pawr/Coro1a/Cd24a/Nckap1l/Sos2/Lgals9/Nck1/Tgfb1/Ptprc/Cd86/Lipa/Bmp4/Cd37/Ctnnb1/Cxcl12/Tnfrsf1b/Il20rb/Irf1/Cd209a/Lrrc32/Il4i1/Jak3/Sh3rf1/Gja1/P2rx7/H2-K1/H2-Aa/Il15/Itgb2/Dock2/Syk/H2-D1/Rac2/Aif1/Lmo1/Ptpn6/Slfn2/Ceacam1/Laptm5/Il1b/Cd151/Kitl/Cxcr4/Vsir/H2-Q4/Igf2/H2-Q7/Tnfrsf21/Ccr2/Irgm1/…
GO:0019882	antigen processing and presentation	89	-0.629461	-2.1899	6.09779e-09	6.09779e-09	3.90787e-07	2269	tags=54%, list=16%, signal=45%	Rftn1/Tapbp/H2-Ob/H2-T22/Tapbpl/Rab8b/Rab27a/H2-Eb1/Raet1e/Psmb8/Psap/Tap2/Rab5b/Tap1/Nod1/Unc93b1/Mill2/H2-DMa/Psme1/H2-K1/H2-Aa/Hfe/B2m/H2-D1/Cd74/H2-Ab1/Psmb9/Cd68/Fcgr3/Mpeg1/Fcer1g/Nod2/Fcgr2b/Mfsd6/Ctss/H2-Q4/H2-Q7/H2-T24/Fcgr1/Slc11a1/H2-Q6/Rab3b/H2-T23/Trem2/Fcgr4/Ighm/Was/Ccr7
GO:0050865	regulation of cell activation	488	-0.40296	-1.70519	9.00084e-09	9.00084e-09	5.68474e-07	2233	tags=33%, list=16%, signal=28%	Stat5b/Zc3h12a/Sos1/Rc3h1/H2-Ob/Lilrb4a/Gpr183/Tyk2/Jak2/Runx3/Zfp608/Lgals3/Dock8/Cd59a/Sash3/Adam8/Nck2/Efnb1/H2-T22/Lst1/Pawr/Tlr4/Coro1a/Il6ra/Tnf/Cd24a/H2-Eb1/Nckap1l/Tnfaip8l2/Sos2/Slc39a10/Cd27/Lgals9/Il16/Nck1/Nlrp3/Tgfb1/Zmiz1/Pear1/Ptprc/Gnaq/Ptpre/Cd86/Bmp4/Nfam1/Stap1/Cd37/Ctnnb1/Il10/Tnfrsf13b/Cd9/Plpp6/Tnfrsf1b/Gpr137b/Cd40/Slamf7/H2-DMa/Hspb1/Il20rb/Kmt5b/Bloc1s6/Irf1/Cd209a/Lrrc32…
GO:0032103	positive regulation of response to external stimulus	509	-0.398966	-1.69447	1.12348e-08	1.12348e-08	6.99433e-07	2085	tags=31%, list=15%, signal=28%	Mark4/Adam17/Eif2ak2/Trim11/Adam8/H2-T22/Nlrp10/Tbk1/Dhx58/Epg5/Trpv4/Pdcd4/Cxcl10/Sec14l1/Lrch4/Tlr7/Tlr4/Otud4/Akirin1/Atat1/Tnf/Tlr1/Cd24a/Wnk1/Nckap1l/Ly96/Zdhhc18/Lgals9/Sash1/Il16/P2ry12/Nlrp3/Ccl3/Tgfb1/Mospd2/Alox5ap/Ifi206/Plcg2/Cd86/Nod1/Tnip3/Stap1/Parp9/Unc93b1/Oasl1/Cxcl12/Trim12a/Irf2/Ifi207/Dapk2/Dab2ip/Hspb1/Rps6ka3/Lpl/Irf1/Ifih1/Mndal/Trim5/Gprc5b/Hyal2/Tlr2/Tifa/C5ar1/Nmi/Trim5…
GO:0002456	T cell mediated immunity	96	-0.608333	-2.12022	1.43801e-08	1.43801e-08	8.82634e-07	2360	tags=46%, list=17%, signal=38%	Gata3/Crlf2/Rftn1/Lilrb4a/Stx7/Fosl2/Sash3/H2-T22/Myo1g/Rab27a/Cd24a/Raet1e/Nckap1l/Tap2/Nlrp3/Ptprc/Cr1l/Unc93b1/Tnfrsf1b/Mill2/Il20rb/Il4i1/Nectin2/Dusp22/P2rx7/H2-K1/Hfe/B2m/H2-D1/Ahr/Il7r/Nod2/Slfn2/Il1b/Vsir/H2-Q4/H2-Q7/H2-T24/Ccr2/Slc11a1/H2-Q6/H2-T23/Rsad2/Was
GO:0002758	innate immune response-activating signaling pathway	229	-0.487164	-1.92001	1.53979e-08	1.53979e-08	9.31976e-07	3116	tags=41%, list=23%, signal=32%	Tlr13/Appl2/Alpk1/Traf6/Irf4/Slc15a2/Esr1/Ptpn22/Arrb2/Fbxl2/Tirap/Tnip2/Nfkbil1/Zc3hav1/Mavs/Traf3ip3/Pum2/Nr1d1/Clec4n/Casp1/Ddx3x/Irak2/Rftn1/Casp4/Becn1/Znrf1/Mark4/Eif2ak2/Trim11/Tbk1/Dhx58/Epg5/Sec14l1/Lrch4/Tlr7/Tlr4/Otud4/Atat1/Tnf/Tlr1/Ly96/Zdhhc18/Nlrp3/Ifi206/Plcg2/Cd86/Nod1/Tnip3/Unc93b1/Oasl1/Irf2/Ifi207/Dab2ip/Rps6ka3/Irf1/Ifih1/Mndal/Tlr2/Tifa/Nmi/Slc15a3/Nop53/Trim25/Cd14/Rnf125/I…
GO:0048002	antigen processing and presentation of peptide antigen	49	-0.724234	-2.28339	2.10158e-08	2.10158e-08	1.25459e-06	2230	tags=65%, list=16%, signal=55%	Tapbp/H2-Ob/H2-T22/Tapbpl/H2-Eb1/Raet1e/Tap2/Tap1/Unc93b1/Mill2/H2-DMa/H2-K1/H2-Aa/Hfe/B2m/H2-D1/Cd74/H2-Ab1/Fcgr3/Mpeg1/Fcer1g/Fcgr2b/Mfsd6/Ctss/H2-Q4/H2-Q7/H2-T24/Fcgr1/Slc11a1/H2-Q6/H2-T23/Trem2
GO:0019884	antigen processing and presentation of exogenous antigen	38	-0.761401	-2.27684	2.26892e-08	2.26892e-08	1.33618e-06	2230	tags=66%, list=16%, signal=55%	Tapbp/H2-Ob/H2-T22/H2-Eb1/Tap2/Unc93b1/H2-DMa/Psme1/H2-K1/H2-Aa/B2m/H2-D1/Cd74/H2-Ab1/Fcgr3/Mpeg1/Fcer1g/Fcgr2b/Mfsd6/Ctss/H2-Q4/H2-Q7/Fcgr1/H2-Q6/H2-T23
GO:0140013	meiotic nuclear division	137	0.552555	2.03628	2.55246e-08	2.55246e-08	1.48311e-06	2325	tags=41%, list=17%, signal=34%	Rbm46/Lif/Knl1/Wnt5a/4930447C04Rik/Ccne2/Ttk/Ccne1/Rad51/Aspm/Top2a/Cks2/M1ap/Birc5/Trip13/Brip1/Sgo1/Psmc3ip/Incenp/Fancm/Chtf18/Cenps/Dnmt3l/Plk1/Mastl/Suv39h2/Fanca/Ndc80/Spire1/Smc2/Nuf2/Cenpe/Brca2/Calr/Ndc1/Espl1/Fbxo5/Rad54l/Rad51ap1/Mybl1/Zwint/Fancd2/Ncaph/Rad54b/Smc4/Syce2/Atm/Ncapd3/Zcwpw1/Eme1/Ooep/Topbp1/Sgo2a/Ddb1/Tdrkh/Rad1
GO:0002221	pattern recognition receptor signaling pathway	225	-0.482621	-1.89405	2.64576e-08	2.64576e-08	1.5171e-06	2291	tags=40%, list=17%, signal=34%	Tlr13/Appl2/Alpk1/Traf6/Irf4/Slc15a2/Esr1/Ptpn22/Arrb2/Fbxl2/Tirap/Tnip2/Nfkbil1/Zc3hav1/Mavs/Traf3ip3/Pum2/Nr1d1/Casp1/Ddx3x/Irak2/Rftn1/Casp4/Becn1/Znrf1/Mark4/Eif2ak2/Trim11/Tbk1/Dhx58/Epg5/Sec14l1/Lrch4/Tlr7/Tlr4/Otud4/Atat1/Tnf/Tlr1/Ly96/Zdhhc18/Nlrp3/Ifi206/Plcg2/Cd86/Nod1/Tnip3/Unc93b1/Oasl1/Irf2/Ifi207/Dab2ip/Rps6ka3/Irf1/Ifih1/Mndal/Tlr2/Tifa/Nmi/Slc15a3/Nop53/Trim25/Cd14/Rnf125/Irgm2/If…
GO:0022408	negative regulation of cell-cell adhesion	159	-0.522172	-1.97596	2.71226e-08	2.71226e-08	1.53503e-06	2381	tags=45%, list=17%, signal=37%	Il2ra/Ptk2/Myadm/Swap70/Zc3h12a/Rc3h1/Lilrb4a/Jak2/Runx3/Zfp608/Lgals3/Adam8/H2-T22/Trpv4/Il1rn/Pawr/Akna/Cd24a/Wnk1/Bmp2/Tnfaip8l2/Lgals9/Tgfb1/Cd86/Bmp4/Rgcc/Cd37/Il10/Cxcl12/Cd9/Hspb1/Il20rb/Irf1/Lrrc32/Il4i1/Jak3/Adora2a/Pf4/Dusp22/Nfkbid/H2-K1/H2-Aa/Dusp3/Hfe/Bmp6/Notch1/H2-D1/Cd74/Ppm1f/Alox12/Spi1/Ptpn6/Sh2b3/Ceacam1/Laptm5/Ccm2l/Cd300a/Hlx/Podxl/Adamts18/Vsir/H2-Q4/Notch4/H2-Q7/Tnfrsf21/S…
GO:0002237	response to molecule of bacterial origin	246	-0.47562	-1.87981	3.05871e-08	3.05871e-08	1.70891e-06	2284	tags=38%, list=17%, signal=32%	Irak2/Abr/Casp4/Stat5b/Zc3h12a/Irak4/Lilrb4a/Jak2/Bcr/Fosl2/Adam17/Eif2ak2/Pdcd4/Cxcl10/Tlr4/Tnf/Fbxo3/Tlr1/Casp7/Cd24a/Ly96/Sbno2/Tap2/Lgals9/Sash1/Nlrp3/Irf5/Slc12a2/Pde4b/Plcg2/Cd86/Tnip3/Stap1/Il10/Plscr4/Trim12a/Tnfrsf1b/Dab2ip/Git1/Rps6ka3/Trim5/Tlr2/Stat1/C5ar1/Trim12c/Pf4/Mapk3/P2rx7/Cd14/Ace/Irgm2/Ncf2/Trim30d/Bmp6/B2m/Tnfrsf11a/Ahr/Cd68/Ptafr/Gch1/Mrc1/Spi1/Nod2/Irf8/Igtp/Lyn/Il1b/Fcgr2…
GO:0009887	animal organ morphogenesis	780	0.35516	1.54535	3.2353e-08	3.2353e-08	1.78469e-06	1630	tags=23%, list=12%, signal=21%	Vdr/Dio3/Grem2/Slit2/Rbp4/Twist2/Sfrp1/Col8a2/Col8a1/Fst/Mfap5/Nrg1/Sfrp2/Cthrc1/Prrx2/Aldh1a3/Aldh1a2/Comp/Lif/Col11a1/Twist1/Osr1/Tnfsf11/Tnc/Adamts16/Fgf7/Efemp2/Fhl2/Fbn2/Serpine1/Scx/Ephb2/Tnfrsf11b/Bmpr1b/Emx2/Thbs1/Tmem119/Lrig3/Wnt5b/Scube2/Fzd2/Meis3/Kif26b/Col5a1/Shox2/Barx2/Tulp1/Col27a1/Has2/Sema3c/Eya4/Slit3/Stil/Enpp1/Thy1/Mfap2/Col1a1/Mdk/Col5a2/Wnt5a/Col6a1/Tbx15/Tgfb3/Meis2/Wnt11…
GO:0030098	lymphocyte differentiation	352	-0.429088	-1.7561	3.63272e-08	3.63272e-08	1.97887e-06	2381	tags=31%, list=17%, signal=27%	Il2ra/Rhoh/Gata3/Xrcc4/Lck/Stat5b/Zc3h12a/Sos1/Rc3h1/Lilrb4a/Gpr183/Runx3/Zfp608/Hdac7/Fosl2/Apc/Ep300/Sash3/Adam17/Adam8/Tcirg1/Tpd52/Prex1/Patz1/Il6ra/Cd24a/Nckap1l/Psap/Sos2/Tusc2/Cdk6/Cd27/Lgals9/Nlrp3/Tgfb1/Pou2f2/Zmiz1/Ptprc/Plcg2/Lipa/Hdac5/Bmp4/Nfam1/Mink1/Ctnnb1/Il10/H2-DMa/Hspb1/Irf1/Fbxo7/Mertk/Il4i1/Jak3/Pf4/Hmga1/Sh3rf1/Cd83/Nfkbid/H2-Aa/Il15/Dock2/Syk/Atp11c/B2m/Cd74/Ahr/H2-Ab1/Itpk…
GO:0010564	regulation of cell cycle process	632	0.37003	1.59291	4.09083e-08	4.09083e-08	2.20092e-06	2504	tags=27%, list=18%, signal=23%	Usp51/Sfrp1/Lif/Cdkn2b/Clspn/Cdca5/Gpsm2/Brca1/Obsl1/Rrm2/Stil/Knl1/Ube2c/Wnt5a/Ccne2/Prc1/Plk4/Sphk1/Kif14/Ttk/Ccne1/Inhba/Rad51/Ccn2/Pdxp/Nek2/E2f8/Anxa1/Orc1/Dtl/Spdl1/Ticrr/Pdpn/Rpa2/Spc25/Spc24/Birc5/Dact1/Blm/Ncapg2/Creb3l1/Fgfr1/Trip13/Mlf1/Egfr/Igf1/Bub1/Ncapg/Kif11/Cdk1/Ccdc8/Hacd1/Rcc1/Pkmyt1/Incenp/Spag5/Tacc3/Rrm1/Diaph3/Ect2/Atad5/Cdca8/Ezh2/Rad18/Kif20b/Cdc25c/Chtf18/Sox9/Aurkb/Plk1…
GO:0050672	negative regulation of lymphocyte proliferation	72	-0.647262	-2.18726	4.39721e-08	4.39721e-08	2.31917e-06	2189	tags=49%, list=16%, signal=41%	Rc3h1/Lilrb4a/H2-T22/Lst1/Pawr/Cd24a/Lgals9/Tgfb1/Cd86/Bmp4/Cd37/Il10/Tnfrsf13b/Il20rb/Lrrc32/Il4i1/Pkn1/H2-K1/H2-Aa/H2-D1/Ptpn6/Tyrobp/Ceacam1/Lyn/Inpp5d/Laptm5/Cd300a/Fcgr2b/Vsir/H2-Q4/H2-Q7/Tnfrsf21/H2-Q6/H2-T23/Cd274
GO:0061448	connective tissue development	243	0.472859	1.86411	4.41706e-08	4.41706e-08	2.31917e-06	1631	tags=30%, list=12%, signal=27%	Lox/Sfrp2/Matn3/Prrx2/Comp/Col11a1/Ccn4/Osr1/Scx/Bmpr1b/Thbs1/Scube2/Col5a1/Ccn3/Shox2/Barx2/Col27a1/Pth1r/Bgn/Ctsk/Enpp1/Loxl2/Pitx1/Col1a1/Mdk/Runx1/Wnt5a/Col6a1/Prkca/Pkdcc/Ogn/Ror2/Col3a1/Ccn2/Thbs3/Mgp/Ltbp3/Prkg2/Bmpr1a/Selenom/Prrx1/Wnt9a/Fgfr1/Acan/Igf1/Fgf2/Sulf2/Sulf1/Chadl/Csgalnact1/Osr2/Six2/Bmp1/Gli3/Csf1/Sox9/Serpinh1/Slc39a13/Sh3pxd2b/Slc39a14/Lnpk/Tgfb2/Creb5/Mia3/Runx2/Gli2/Ext1…
GO:0071345	cellular response to cytokine stimulus	649	-0.370077	-1.60047	5.68156e-08	5.68156e-08	2.94757e-06	2435	tags=32%, list=18%, signal=28%	Eif4a2/Rbck1/Ebi3/Gab1/Il2ra/Casp1/Gata3/Crlf2/Mmp12/Kif16b/Mynn/Flnb/Tjp2/Fkbp1a/Irak2/Stxbp2/Casp4/Rnf31/Stat5b/Mapk11/Zc3h12a/Irak4/Adipor1/Rc3h1/Lilrb4a/Tyk2/Jak2/Slk/Ep300/Dock8/Adipor2/Dusp1/Adam17/B3gnt2/Ubxn2a/Tcirg1/Bbs4/Tbk1/Evl/Cxcl10/Il1rn/Rab11fip5/Grk2/Tlr4/Otud4/Samhd1/Coro1a/Tank/Ldlrap1/Il6ra/Tnf/Dcp1b/Foxc1/Vamp3/Cd24a/Csf3r/Wnk1/Sbno2/Rffl/Socs3/Ccl12/Il16/Adamts7/Ccl3/Irf5/Hip…
GO:0002444	myeloid leukocyte mediated immunity	89	-0.605353	-2.10602	8.13225e-08	8.13225e-08	4.16935e-06	2267	tags=45%, list=16%, signal=38%	Fes/Stxbp2/Abr/Pld2/Irak4/Bcr/H2-T22/Kmt2e/Tusc2/Cplx2/Stap1/Lat2/Gata2/Myo1f/H2-K1/Ace/Itgb2/Syk/H2-D1/Rac2/Ptafr/Fcgr3/Spi1/Fcer1g/Tyrobp/Lyn/Cd300a/Fcgr2b/Cd84/H2-Q4/Cx3cr1/H2-Q7/Ccr2/Fcgr1/Kit/Ncf1/H2-Q6/H2-T23/Fcgr4/Chga
GO:0002697	regulation of immune effector process	305	-0.437471	-1.76192	9.01428e-08	9.01428e-08	4.56783e-06	2267	tags=38%, list=16%, signal=32%	Fes/Stxbp2/Abr/Casp4/Pld2/Stat5b/Zc3h12a/Cfp/Rc3h1/Lilrb4a/Stx7/Bcr/Lgals3/Cd59a/Sash3/H2-T22/Dhx58/Masp1/Tlr7/Tlr4/Tnf/Cd24a/Raet1e/Nckap1l/Tap2/Cd27/Lgals9/Nlrp3/Irf5/Tgfb1/Tap1/Ptprc/Cr1l/Plcg2/Cd86/Nod1/Stap1/Cd37/Il10/Tnfrsf1b/Cd40/Mill2/Il20rb/Kmt5b/Irf1/Gata2/Gprc5b/Tlr2/Bst2/Il4i1/Jak3/Enpp3/Rapgef1/Pf4/Sema7a/Pkn1/Nectin2/Dusp22/Nfkbid/P2rx7/H2-K1/Il27ra/Itgb2/Hfe/Syk/B2m/H2-D1/Cd74/Ahr/…
GO:0022407	regulation of cell-cell adhesion	374	-0.415856	-1.71588	9.52953e-08	9.52953e-08	4.73383e-06	2381	tags=37%, list=17%, signal=31%	Il2ra/Ptk2/Rhoh/Gata3/Myadm/Lck/Swap70/Stat5b/Zc3h12a/Rc3h1/H2-Ob/Lilrb4a/Tyk2/Jak2/Runx3/Zfp608/Lgals3/Dock8/Cd59a/Sash3/Piezo1/Adam8/Nck2/Efnb1/H2-T22/Trpv4/Il1rn/Pawr/Coro1a/Il6ra/Tnf/Akna/Cd24a/Wnk1/H2-Eb1/Nckap1l/Bmp2/Tnfaip8l2/Cd27/Lgals9/Nck1/Nlrp3/Tgfb1/Zmiz1/Ptprc/Cd86/Bmp4/Rgcc/Cd37/Mink1/Il10/Cxcl12/Cd9/Myo10/H2-DMa/Sele/Hspb1/Il20rb/Irf1/Fermt3/Lrrc32/Il4i1/Jak3/Adora2a/Pf4/Taok2/Magi…
GO:0050863	regulation of T cell activation	285	-0.444496	-1.77941	9.55914e-08	9.55914e-08	4.73383e-06	2381	tags=35%, list=17%, signal=30%	Il2ra/Rhoh/Gata3/Lck/Stat5b/Zc3h12a/Sos1/Rc3h1/H2-Ob/Lilrb4a/Tyk2/Jak2/Runx3/Zfp608/Lgals3/Dock8/Cd59a/Sash3/Adam8/Nck2/Efnb1/H2-T22/Pawr/Coro1a/Cd24a/H2-Eb1/Nckap1l/Tnfaip8l2/Sos2/Cd27/Lgals9/Nck1/Nlrp3/Tgfb1/Zmiz1/Ptprc/Cd86/Bmp4/Cd37/Ctnnb1/Tnfrsf1b/H2-DMa/Hspb1/Il20rb/Irf1/Cd209a/Lrrc32/Il4i1/Jak3/Adora2a/Pf4/Sh3rf1/Dusp22/Efnb2/Cd83/Nfkbid/H2-K1/H2-Aa/Dusp3/Il15/Hfe/Syk/B2m/H2-D1/Cd74/H2-Ab1…
GO:0050852	T cell receptor signaling pathway	97	-0.592325	-2.07275	9.81848e-08	9.81848e-08	4.80763e-06	2429	tags=47%, list=18%, signal=39%	Rbck1/Gata3/Lck/Rftn1/Rnf31/Zc3h12a/Rc3h1/Lilrb4a/Lgals3/Fosl2/Usp12/Fyn/Pawr/Plcg1/Wnk1/Nras/Ubash3a/Ptprc/Pde4b/Plcg2/Lipa/Cd2ap/Dgkz/Btnl9/Elf1/Nectin2/Dusp22/Nfkbid/H2-K1/Dusp3/H2-D1/Prkd2/Bcl2a1d/Ptpn6/Laptm5/Cd300a/Tec/Lcp2/H2-Q4/Cd247/H2-Q7/Tnfrsf21/H2-Q6/Icosl/Themis2/Ccr7
GO:0048285	organelle fission	400	0.412506	1.7178	1.18584e-07	1.18584e-07	5.74198e-06	2126	tags=28%, list=15%, signal=24%	Rbm46/Lif/Cdca5/Obsl1/Knl1/Ube2c/Cenpk/Wnt5a/Mybl2/4930447C04Rik/Ccne2/Mtfr2/Prc1/Sphk1/Kif14/Ttk/Ccne1/Rad51/Tubg2/Aspm/Pdxp/Nek2/Top2a/Spdl1/Cks2/Spc25/Spc24/M1ap/Birc5/Ska1/Ncapg2/Trip13/Dcn/Ska3/Igf1/Bub1/Ncapg/Brip1/Kif11/Uhrf1/Cdk1/Ccdc8/Rcc1/Sgo1/Psmc3ip/Incenp/Fancm/Spag5/Cdca8/Nfix/Cenpi/Bnip3/Chtf18/Cenps/Dnmt3l/Aurkb/Plk1/Tpx2/Mastl/Suv39h2/Kifc1/Fanca/Ndc80/Gen1/Cdca2/Spire1/Zwilch/Sm…
GO:0002478	antigen processing and presentation of exogenous peptide antigen	32	-0.774087	-2.23544	1.46356e-07	1.46356e-07	7.00883e-06	2230	tags=75%, list=16%, signal=63%	Tapbp/H2-Ob/H2-T22/H2-Eb1/Tap2/Unc93b1/H2-DMa/H2-K1/H2-Aa/B2m/H2-D1/Cd74/H2-Ab1/Fcgr3/Mpeg1/Fcer1g/Fcgr2b/Mfsd6/Ctss/H2-Q4/H2-Q7/Fcgr1/H2-Q6/H2-T23
GO:0002706	regulation of lymphocyte mediated immunity	134	-0.542726	-1.98648	1.54685e-07	1.54685e-07	7.30297e-06	1743	tags=41%, list=13%, signal=36%	Stat5b/Lilrb4a/Stx7/Sash3/H2-T22/Tnf/Cd24a/Raet1e/Nckap1l/Tap2/Lgals9/Nlrp3/Tgfb1/Tap1/Ptprc/Cr1l/Tnfrsf1b/Cd40/Mill2/Il20rb/Kmt5b/Il4i1/Nectin2/Dusp22/P2rx7/H2-K1/Il27ra/Hfe/B2m/H2-D1/Ahr/Tnfsf13/Fcgr3/Fcer1g/Il7r/Nod2/Ptpn6/Clec2d/Ceacam1/Il1b/Fcgr2b/Vsir/H2-Q4/Igf2/H2-Q7/H2-T24/Ccr2/Fcgr1/Gimap5/H2-Q6/Pik3r6/H2-T23/Trem2/Rsad2/Was
GO:0032945	negative regulation of mononuclear cell proliferation	73	-0.638756	-2.16425	1.5585e-07	1.5585e-07	7.30297e-06	2189	tags=48%, list=16%, signal=41%	Rc3h1/Lilrb4a/H2-T22/Lst1/Pawr/Cd24a/Lgals9/Tgfb1/Cd86/Bmp4/Cd37/Il10/Tnfrsf13b/Il20rb/Lrrc32/Il4i1/Pkn1/H2-K1/H2-Aa/H2-D1/Ptpn6/Tyrobp/Ceacam1/Lyn/Inpp5d/Laptm5/Cd300a/Fcgr2b/Vsir/H2-Q4/H2-Q7/Tnfrsf21/H2-Q6/H2-T23/Cd274
GO:0071216	cellular response to biotic stimulus	197	-0.482097	-1.87376	1.89074e-07	1.89074e-07	8.76557e-06	2369	tags=38%, list=17%, signal=32%	Casp1/Cd180/Irak2/Zc3h12a/Irak4/Lilrb4a/Jak2/Bcr/Tigar/Pdcd4/Cxcl10/Tlr4/Tnf/Tlr1/Casp7/Ly96/Sbno2/Sash1/Nlrp3/Slc12a2/Pde4b/Plcg2/Cd86/Tnip3/Stap1/Il10/Plscr4/Trim12a/Tnfrsf1b/Dab2ip/Git1/Trim5/Tlr2/Stat1/Trim12c/Pf4/Mapk3/Cd14/Irgm2/Syk/Trim30d/Bmp6/Notch1/B2m/Ahr/Cd68/Gch1/Mrc1/Spi1/Nod2/Irf8/Igtp/Lyn/Txnip/Il1b/Fcgr2b/Mef2c/Cd84/Trim30a/Cx3cr1/Gbp2/Abca1/Nos2/Pde2a/Ly86/Cd36/Irgm1/Gbp3/Gbp5/N…
GO:0043299	leukocyte degranulation	57	-0.665779	-2.1561	1.91896e-07	1.91896e-07	8.80275e-06	2267	tags=46%, list=16%, signal=38%	Fes/Stxbp2/Abr/Pld2/Bcr/Rab27a/Coro1a/Nckap1l/Lgals9/Cplx2/Lat2/Gata2/Myo1f/Itgb2/Syk/Rac2/Ptafr/Spi1/Fcer1g/Lyn/Cd300a/Cd84/Ccr2/Kit/Fcgr4/Chga
GO:0098609	cell-cell adhesion	609	-0.367229	-1.57984	1.94126e-07	1.94126e-07	8.81232e-06	2189	tags=33%, list=16%, signal=29%	Rc3h1/H2-Ob/Lilrb4a/Tyk2/Kirrel3/Jak2/Runx3/Zfp608/Lgals3/Dock8/Cd59a/Sash3/Piezo1/Adam8/Ret/Nck2/Efnb1/H2-T22/Msn/Trpv4/Tspan9/Il1rn/Pawr/Sema4d/Coro1a/Il6ra/Tnf/Kifc3/Akna/Lrg1/Cd24a/Wnk1/H2-Eb1/Nckap1l/Bmp2/Tnfaip8l2/Cd27/Ctnnd1/Pcdhb18/Lgals9/Nck1/P2ry12/Tmem47/Nlrp3/Ctnna1/Tgfb1/Zmiz1/Pear1/Hmcn1/Ptprc/Cd86/Pip5k1c/Bmp4/Pcdhb16/Rgcc/Cd37/Mink1/Ctnnb1/Cd2ap/Il10/Cxcl12/Cd9/Myo10/Itga9/Cadm3/C…
GO:0051304	chromosome separation	72	0.632856	2.13518	2.02712e-07	2.02712e-07	9.10721e-06	2002	tags=47%, list=15%, signal=41%	Knl1/Ube2c/Ttk/Top2a/Spdl1/Spc25/Spc24/M1ap/Birc5/Ncapg2/Trip13/Bub1/Ncapg/Incenp/Cdca8/Aurkb/Plk1/Ndc80/Gen1/Zwilch/Smc2/Nuf2/Klhl22/Cenpe/Cdc16/Anapc15/Espl1/Fbxo5/Zwint/Cdk5rap2/Ncaph/Smc4/Atm/Ncapd3
GO:0002704	negative regulation of leukocyte mediated immunity	56	-0.68614	-2.21992	2.10574e-07	2.10574e-07	9.19442e-06	2252	tags=66%, list=16%, signal=55%	Abr/Lilrb4a/Bcr/H2-T22/Nckap1l/Tap2/Lgals9/Tgfb1/Tap1/Ptprc/Cr1l/Il20rb/Bst2/Il4i1/Jak3/Dusp22/H2-K1/Hfe/H2-D1/Ahr/Spi1/Il7r/Nod2/Ptpn6/Clec2d/Ceacam1/Cd300a/Fcgr2b/Cd84/Vsir/H2-Q4/Igf2/Cx3cr1/H2-Q7/Ccr2/H2-Q6/H2-T23
GO:0170041	non-proteinogenic amino acid metabolic process	53	0.67918	2.21274	2.10592e-07	2.10592e-07	9.19442e-06	1796	tags=43%, list=13%, signal=38%	Slc1a3/P4ha3/Phgdh/Ddah1/Azin2/Plod2/Dpep1/P4ha2/Ass1/P4ha1/Sardh/Aldh18a1/P4hb/Abat/Aldh1a1/Egln3/Crtap/Cad/Prdx4/Nox4/Plod3/Mthfd1/Ahcy
GO:0002824	positive regulation of adaptive immune response based on somatic recombination of immune receptors built from immunoglobulin superfamily domains	101	-0.57189	-2.03083	2.10983e-07	2.10983e-07	9.19442e-06	2171	tags=43%, list=16%, signal=36%	Tyk2/Stx7/Jak2/Sash3/H2-T22/Nlrp10/Tnf/Cd24a/Raet1e/Tap2/Nlrp3/Tgfb1/Ptprc/Cd40/Mill2/H2-DMa/Kmt5b/Nectin2/Nfkbid/P2rx7/H2-K1/Il27ra/Hfe/B2m/H2-D1/Tnfsf13/H2-Ab1/Fcgr3/Fcer1g/Nod2/Il1b/H2-Q4/H2-Q7/H2-T24/Ccr2/Fcgr1/Slc11a1/Gimap5/H2-Q6/H2-T23/Trem2/Cd274/Rsad2
GO:0045576	mast cell activation	55	-0.675416	-2.1773	2.16652e-07	2.16652e-07	9.348e-06	2633	tags=49%, list=19%, signal=40%	Stxbp1/Ndrg1/Rhoh/Crlf2/Fes/Stxbp2/Pld2/Lilrb4a/Tlr4/Cplx2/Ptpre/Lat2/Gata2/Enpp3/Nectin2/Syk/Rac2/Fcgr3/Fcer1g/Ptpn6/Lyn/Cd300a/Cd84/Lcp2/Cd48/Kit/Chga
GO:0051983	regulation of chromosome segregation	116	0.560553	2.02497	2.24223e-07	2.24223e-07	9.5798e-06	2002	tags=38%, list=15%, signal=33%	Knl1/Ube2c/Ttk/Spdl1/Spc25/Spc24/Birc5/Ncapg2/Trip13/Bub1/Ncapg/Cdk1/Incenp/Tacc3/Cdca8/Rad18/Chtf18/Aurkb/Plk1/Ndc80/Gen1/Bcl7c/Cdca2/Zwilch/Smc2/Nuf2/Klhl22/Cenpe/Nek6/Smarcc1/Mki67/Cdc16/Anapc15/Dpf1/Fbxo5/Zwint/Cdk5rap2/Cdc6/Ncaph/Smc4/Rmi2/Phf10/Atm/Ncapd3
GO:0007159	leukocyte cell-cell adhesion	309	-0.430921	-1.74024	2.28856e-07	2.28856e-07	9.6828e-06	2233	tags=34%, list=16%, signal=29%	Stat5b/Zc3h12a/Rc3h1/H2-Ob/Lilrb4a/Tyk2/Jak2/Runx3/Zfp608/Lgals3/Dock8/Cd59a/Sash3/Adam8/Nck2/Efnb1/H2-T22/Msn/Pawr/Sema4d/Coro1a/Tnf/Lrg1/Cd24a/Wnk1/H2-Eb1/Nckap1l/Tnfaip8l2/Cd27/Lgals9/Nck1/Nlrp3/Tgfb1/Zmiz1/Ptprc/Cd86/Bmp4/Cd37/Cxcl12/H2-DMa/Sele/Hspb1/Il20rb/Irf1/Fermt3/Lrrc32/Il4i1/Selplg/Jak3/Adora2a/Pf4/Dusp22/Efnb2/Cd83/Nfkbid/H2-K1/H2-Aa/Dusp3/Il15/Itgb2/Hfe/Syk/Ets1/B2m/H2-D1/Cd74/H2-Ab…
GO:0002709	regulation of T cell mediated immunity	71	-0.640298	-2.15667	2.54073e-07	2.54073e-07	1.06464e-05	2180	tags=48%, list=16%, signal=41%	Lilrb4a/Stx7/Sash3/H2-T22/Cd24a/Raet1e/Nckap1l/Tap2/Nlrp3/Ptprc/Tnfrsf1b/Mill2/Il20rb/Il4i1/Nectin2/Dusp22/P2rx7/H2-K1/Hfe/B2m/H2-D1/Ahr/Il7r/Nod2/Il1b/Vsir/H2-Q4/H2-Q7/H2-T24/Ccr2/H2-Q6/H2-T23/Rsad2/Was
GO:0050830	defense response to Gram-positive bacterium	70	-0.6399	-2.15409	2.63217e-07	2.63217e-07	1.09245e-05	1191	tags=53%, list=9%, signal=49%	Rnase6/Casp4/Adam17/H2-T22/Tbk1/Tnf/Nlrp3/Nod1/Tlr2/Myo1f/C5ar1/P2rx7/H2-K1/Il27ra/B2m/H2-D1/Mpeg1/Epha2/Il7r/Nod2/Pglyrp1/Il1b/H2-Q4/Lyz2/Gbp2/H2-Q7/Cd36/Gbp3/Hck/Ncf1/Gbp4/H2-Q6/Gbp7/H2-T23/Gbp9/Gbp6/Chga
GO:0050866	negative regulation of cell activation	168	-0.503908	-1.9117	2.75285e-07	2.75285e-07	1.13176e-05	2219	tags=42%, list=16%, signal=36%	Zc3h12a/Rc3h1/Lilrb4a/Runx3/Zfp608/Lgals3/H2-T22/Lst1/Pawr/Cd24a/Tnfaip8l2/Lgals9/Tgfb1/Cd86/Bmp4/Cd37/Il10/Tnfrsf13b/Cd9/Hspb1/Il20rb/Irf1/Lrrc32/Fbxo7/Mertk/Il4i1/Jak3/Enpp3/Adora2a/Pf4/Pkn1/Dusp22/Nfkbid/H2-K1/H2-Aa/Tafa3/Dusp3/Hfe/H2-D1/Cd74/Alox12/Ptpn6/Tyrobp/Sh2b3/Pglyrp1/Ceacam1/Lyn/Inpp5d/Zbtb46/Pparg/Laptm5/Cd300a/Hlx/Fcgr2b/Adamts18/Cd84/Adgrf5/Vsir/H2-Q4/Apoe/Pdgfb/H2-Q7/Tnfrsf21/Gima…
GO:0002822	regulation of adaptive immune response based on somatic recombination of immune receptors built from immunoglobulin superfamily domains	154	-0.514181	-1.93971	2.79488e-07	2.79488e-07	1.13343e-05	2219	tags=42%, list=16%, signal=36%	Zc3h12a/Rc3h1/Lilrb4a/Tyk2/Stx7/Jak2/Sash3/H2-T22/Nlrp10/Tnf/Cd24a/Raet1e/Nckap1l/Tap2/Nlrp3/Tgfb1/Ptprc/Cr1l/Tnfrsf1b/Cd40/Mill2/H2-DMa/Il20rb/Kmt5b/Irf1/Il4i1/Jak3/Pf4/Pkn1/Nectin2/Dusp22/Nfkbid/P2rx7/H2-K1/Il27ra/Hfe/B2m/H2-D1/Ahr/Tnfsf13/H2-Ab1/Fcgr3/Fcer1g/Il7r/Nod2/Ptpn6/Il1b/Hlx/Fcgr2b/Mef2c/Vsir/H2-Q4/H2-Q7/H2-T24/Ccr2/Fcgr1/Slc11a1/Gimap5/H2-Q6/H2-T23/Trem2/Cd274/Rsad2/Was/Ccr7
GO:0071222	cellular response to lipopolysaccharide	163	-0.505013	-1.91508	2.80893e-07	2.80893e-07	1.13343e-05	3058	tags=50%, list=22%, signal=40%	Traf6/Il1a/Tbxa2r/Mapk1/Akap8/Ptpn22/Arid5a/Tnip2/Chmp5/Zfp36/Nfkbil1/Cxcl9/Ogt/Rara/Nr1d1/Casp1/Cd180/Irak2/Zc3h12a/Irak4/Lilrb4a/Jak2/Bcr/Pdcd4/Cxcl10/Tlr4/Tnf/Casp7/Ly96/Sbno2/Sash1/Nlrp3/Slc12a2/Pde4b/Plcg2/Cd86/Tnip3/Stap1/Il10/Plscr4/Trim12a/Tnfrsf1b/Dab2ip/Git1/Trim5/Stat1/Trim12c/Pf4/Mapk3/Cd14/Irgm2/Trim30d/Bmp6/B2m/Cd68/Gch1/Mrc1/Spi1/Nod2/Irf8/Igtp/Lyn/Il1b/Mef2c/Cd84/Trim30a/Cx3cr1/Gb…
GO:0042832	defense response to protozoan	32	-0.767533	-2.21652	2.86042e-07	2.86042e-07	1.14362e-05	1651	tags=59%, list=12%, signal=52%	Nras/Cd37/Il10/Cd40/Pf4/Irgm2/Irf8/Igtp/Gbp2/Tgtp1/Slc11a1/Gbp3/Gbp4/Gbp7/Gbp9/Iigp1/Gbp6/Tgtp2/Batf2
GO:0002062	chondrocyte differentiation	105	0.568722	2.02285	3.07405e-07	3.07405e-07	1.21785e-05	1631	tags=41%, list=12%, signal=36%	Sfrp2/Comp/Col11a1/Ccn4/Osr1/Scx/Bmpr1b/Scube2/Ccn3/Shox2/Col27a1/Pth1r/Loxl2/Mdk/Runx1/Prkca/Pkdcc/Ror2/Col3a1/Ccn2/Ltbp3/Prkg2/Bmpr1a/Wnt9a/Fgfr1/Acan/Sulf2/Sulf1/Chadl/Osr2/Six2/Gli3/Sox9/Serpinh1/Slc39a14/Lnpk/Mia3/Runx2/Gli2/Ext1/Adamts12/Fgf18/Mkx
GO:0098657	import into cell	684	-0.35101	-1.52146	3.26722e-07	3.26722e-07	1.28272e-05	1914	tags=25%, list=14%, signal=23%	Fyn/Ralb/Grk2/Pawr/Tlr4/Sh3bp4/Rab27a/Dgkd/Coro1a/Ldlrap1/Tnf/Inpp5f/Lrrc8b/Pik3c2a/Cbl/Hspg2/Ankrd13a/Cd24a/Ston1/Wnk1/Wasf2/Insr/Nckap1l/Atp9a/Micall1/Dpysl2/Tusc2/Slc39a10/Myo6/Rab5b/Tgfb1/Pear1/Sdcbp/Slc12a2/Ptprc/Sgip1/Rin3/Plcg2/Lrrc8a/Pip5k1c/Rab5c/Lipa/Cdc42se2/Adrb2/Stap1/Lmbrd1/Sorl1/Cd2ap/Cd9/Rgs2/Fcho2/Actn4/Ackr3/Atp1b3/Apln/Ifitm3/P2ry6/Sele/Rinl/Dcx/Clcn3/Cln3/Gata2/Cd209a/Lrp5/Tlr…
GO:0042129	regulation of T cell proliferation	141	-0.520725	-1.93147	3.57341e-07	3.57341e-07	1.39041e-05	2233	tags=41%, list=16%, signal=35%	Stat5b/Sos1/Rc3h1/Lilrb4a/Tyk2/Jak2/Lgals3/Cd59a/Sash3/Nck2/Efnb1/H2-T22/Pawr/Coro1a/Cd24a/Nckap1l/Sos2/Lgals9/Nck1/Tgfb1/Ptprc/Cd86/Bmp4/Cd37/Ctnnb1/Tnfrsf1b/Il20rb/Irf1/Cd209a/Lrrc32/Il4i1/Jak3/Sh3rf1/H2-K1/H2-Aa/Il15/Syk/H2-D1/Rac2/Aif1/Lmo1/Ptpn6/Ceacam1/Laptm5/Il1b/Kitl/Vsir/H2-Q4/Igf2/H2-Q7/Tnfrsf21/Ccr2/Irgm1/H2-Q6/H2-T23/Icosl/Cd274/Ccr7
GO:0071219	cellular response to molecule of bacterial origin	172	-0.497025	-1.89478	3.78845e-07	3.78845e-07	1.46103e-05	2936	tags=51%, list=21%, signal=40%	Traf6/Il1a/Tbxa2r/Mapk1/Akap8/Ptpn22/Arid5a/Tirap/Tnip2/Chmp5/Zfp36/Nfkbil1/Cxcl9/Ogt/Rara/Nr1d1/Casp1/Cd180/Irak2/Zc3h12a/Irak4/Lilrb4a/Jak2/Bcr/Pdcd4/Cxcl10/Tlr4/Tnf/Tlr1/Casp7/Ly96/Sbno2/Sash1/Nlrp3/Slc12a2/Pde4b/Plcg2/Cd86/Tnip3/Stap1/Il10/Plscr4/Trim12a/Tnfrsf1b/Dab2ip/Git1/Trim5/Tlr2/Stat1/Trim12c/Pf4/Mapk3/Cd14/Irgm2/Trim30d/Bmp6/B2m/Ahr/Cd68/Gch1/Mrc1/Spi1/Nod2/Irf8/Igtp/Lyn/Il1b/Fcgr2b/M…
GO:0061982	meiosis I cell cycle process	89	0.594559	2.06919	3.93686e-07	3.93686e-07	1.49807e-05	2116	tags=40%, list=15%, signal=34%	Knl1/4930447C04Rik/Ccne2/Ccne1/Rad51/Top2a/Cks2/M1ap/Birc5/Trip13/Brip1/Pkmyt1/Psmc3ip/Fancm/Cdc25c/Chtf18/Cenps/Dnmt3l/Plk1/Ndc80/Cenpe/Brca2/Ndc1/Espl1/Fbxo5/Rad54l/Rad51ap1/Mybl1/Zwint/Fancd2/Rad54b/Syce2/Atm/Zcwpw1/Eme1/Topbp1
GO:1905818	regulation of chromosome separation	64	0.64364	2.14303	3.95325e-07	3.95325e-07	1.49807e-05	2992	tags=61%, list=22%, signal=48%	Knl1/Ube2c/Ttk/Spdl1/Spc25/Spc24/Birc5/Ncapg2/Trip13/Bub1/Ncapg/Incenp/Cdca8/Aurkb/Plk1/Ndc80/Gen1/Zwilch/Smc2/Nuf2/Klhl22/Cenpe/Cdc16/Anapc15/Fbxo5/Zwint/Cdk5rap2/Ncaph/Smc4/Atm/Ncapd3/Mad2l1/Haspin/Kntc1/Nsmce2/Anapc11/Cdc20/Ccnb1/Bub1b
GO:0006811	monoatomic ion transport	685	-0.35384	-1.53326	4.2239e-07	4.2239e-07	1.58684e-05	2015	tags=24%, list=15%, signal=22%	Tcirg1/Rab11b/Slc4a8/Tomm40l/Trpv4/Cxcl10/Gpd1l/Fyn/Fxyd5/Pllp/Pawr/Plcg1/Tspan18/Slc30a4/Coro1a/Abcc3/Mcoln1/Lrrc8b/Pik3c2a/Abcb7/Htr7/Chrnb1/Wnk1/Atp6v0d2/Pacc1/Atox1/Slc39a10/Gnai2/Lrrc8d/Il16/P2ry12/Stac/Tgfb1/Atp6v0a1/Slc12a2/Ptprc/Gnaq/Pde4b/Slco3a1/Plcg2/Lrrc8a/Adrb2/Bmp4/Cacng1/Inpp5k/Ctnnb1/Cxcl12/Atp1b3/Mylk/Hecw2/Slc10a6/Stom/P2ry6/Dmd/Clcn3/Cnksr3/Klhl3/Myo1b/Slc31a2/Jak3/Ikbkb/Tmem37…
GO:0044772	mitotic cell cycle phase transition	387	0.39679	1.64509	4.33305e-07	4.33305e-07	1.61393e-05	2503	tags=29%, list=18%, signal=24%	Cdkn2b/Clspn/Cdca5/Brca1/Rrm2/Stil/Knl1/Ube2c/Ccne2/Rhou/Kif14/Ttk/Ccne1/Inhba/Anxa1/Orc1/Dtl/Spdl1/Ticrr/Pdpn/Rpa2/Cks2/Spc25/Spc24/Cks1b/Birc5/Dact1/Blm/Creb3l1/Trip13/Egfr/Bub1/Cdk1/Hacd1/Rcc1/Pkmyt1/Incenp/Tacc3/Ccna2/Rrm1/Atad5/Cdca8/Nfix/Ezh2/Cdc25c/Tcf19/Cdk14/Aurkb/Plk1/E2f1/Mastl/Nasp/Donson/Ndc80/Gen1/Bcl7c/Cdkn2a/Bard1/Zwilch/Cdk5rap3/Iqgap3/Nuf2/Klhl22/Cenpe/Skp2/Nek6/Smarcc1/Cdc16/An…
GO:0002753	cytoplasmic pattern recognition receptor signaling pathway	151	-0.512863	-1.92731	4.51925e-07	4.51925e-07	1.66902e-05	2291	tags=36%, list=17%, signal=30%	Ddx3x/Rftn1/Casp4/Becn1/Mark4/Eif2ak2/Trim11/Tbk1/Dhx58/Epg5/Sec14l1/Tlr7/Tlr4/Atat1/Tnf/Zdhhc18/Nlrp3/Ifi206/Plcg2/Cd86/Nod1/Unc93b1/Oasl1/Irf2/Ifi207/Irf1/Ifih1/Mndal/Tifa/Slc15a3/Nop53/Trim25/Rnf125/Irgm2/Ifi209/Nod2/Oas1a/Pik3ap1/Igtp/Ifi203/Irf7/Trim30a/Ddx60/Gbp2/Tlr3/Cd36/Irgm1/Cav1/Gbp5/Trem2/Ifi213/Rsad2/Ifi208/Kcnj8
GO:0030217	T cell differentiation	263	-0.444833	-1.77065	4.59244e-07	4.59244e-07	1.6818e-05	2587	tags=33%, list=19%, signal=27%	Batf/Cyp26b1/Rara/Arid1a/Smarcd1/Il2ra/Rhoh/Gata3/Xrcc4/Lck/Stat5b/Zc3h12a/Sos1/Rc3h1/Lilrb4a/Gpr183/Runx3/Zfp608/Fosl2/Apc/Sash3/Adam17/Adam8/Tcirg1/Prex1/Patz1/Il6ra/Nckap1l/Psap/Sos2/Cdk6/Cd27/Lgals9/Nlrp3/Tgfb1/Zmiz1/Ptprc/Lipa/Bmp4/Mink1/Ctnnb1/H2-DMa/Hspb1/Irf1/Il4i1/Jak3/Pf4/Hmga1/Sh3rf1/Cd83/Nfkbid/H2-Aa/Il15/Dock2/Syk/B2m/Cd74/Itpkb/Spi1/Fcer1g/Il7r/Bcl2a1d/Igtp/Sh2b3/Chd7/Ikzf1/Jag2/Il1…
GO:0048872	homeostasis of number of cells	326	-0.415738	-1.68989	5.01704e-07	5.01704e-07	1.82198e-05	2236	tags=31%, list=16%, signal=27%	Wdr37/Stat5b/Cflar/Sos1/Rc3h1/Lilrb4a/Gpr183/Jak2/Bcr/Tgfbr3/Fosl2/Dnase2a/Akt3/Tmod3/Sash3/Adam17/Ptbp3/Tcirg1/Vps54/Tspan9/Kmt2e/Coro1a/Fam210b/Sp1/Cd24a/Nbea/Nckap1l/Sos2/Cdk6/Klf13/Tgfb1/Pde4b/Lipa/Bmp4/Tnfrsf13b/Adar/Il20rb/Bloc1s6/Gata2/Stat1/Mertk/Jak3/Zfpm1/Ikbkb/Rassf2/Zbtb18/Hmga1/Pkn1/Hoxa5/P2rx7/Xiap/Tsc22d3/Ampd3/Csf1r/Rb1/Notch1/Ets1/B2m/Cd74/Ahr/Pik3cb/Lmo2/Rac2/Itpkb/Spi1/Fcer1g/I…
GO:0000075	cell cycle checkpoint signaling	177	0.488236	1.85275	5.82109e-07	5.82109e-07	2.0965e-05	2570	tags=33%, list=19%, signal=27%	Clspn/Brca1/Stil/Knl1/Ttk/Rad51/Orc1/Dtl/Spdl1/Ticrr/Rpa2/Spc25/Spc24/Birc5/Blm/Creb3l1/Trip13/Bub1/Cdk1/Incenp/Diaph3/Cdca8/Aurkb/Plk1/E2f1/Donson/Ndc80/Gen1/Bard1/Zwilch/Cdk5rap3/Nuf2/Klhl22/Cenpe/Brca2/Mdc1/Anapc15/Brsk1/Ier3/Zwint/Cdk5rap2/Fancd2/Cdc6/Rint1/Cdt1/Atm/Eme1/Chek1/Topbp1/Mad2l1/Rbbp8/Rad1/Rad50/Haspin/Rnaseh2b/Kntc1/Prpf19/Pidd1
GO:0001817	regulation of cytokine production	623	-0.359588	-1.54786	5.96713e-07	5.96713e-07	2.13149e-05	2369	tags=31%, list=17%, signal=27%	Casp1/Gata3/Crlf2/Nmb/Mmp12/Zbtb34/Ddx3x/Rftn1/Casp4/Stat5b/Mapk11/Zc3h12a/Tmem106a/Lilrb4a/Tyk2/Jak2/Hdac7/Cd59a/Sash3/Adam17/Casp8/Eif2ak2/Adam8/Abcd1/H2-T22/Nlrp10/Tbk1/Dhx58/Trpv4/Pdcd4/Tlr7/Grk2/Tlr4/Arhgef2/Tank/Patz1/Il6ra/Tnf/Tlr1/Cd24a/Nckap1l/Ly96/Tusc2/Nras/Cd27/Lgals9/Il16/Arrdc4/Nlrp3/Ccl3/Irf5/Tgfb1/Pou2f2/Ubash3a/Ptprc/Ifi206/Pde4b/Plcg2/Nod1/Nfam1/Rgcc/Heg1/Unc93b1/Sorl1/N4bp1/Cd2…
GO:0001503	ossification	337	0.416773	1.71043	6.3112e-07	6.3112e-07	2.23606e-05	1039	tags=20%, list=8%, signal=19%	Vdr/Twist2/Sfrp1/Clec11a/Lox/Sfrp2/Cthrc1/Comp/Smoc1/Ccn4/Twist1/Osr1/Tnfsf11/Gfra4/Fhl2/Fbn2/Scx/Bmpr1b/Tmem119/P3h1/Scube2/Shox2/Tnfaip6/Pth1r/Tnn/Enpp1/Col1a1/Mdk/Runx1/Wnt5a/Col6a1/Wnt11/Pkdcc/Col1a2/Ptgs2/Tent5a/Aspn/Ptn/Ccn2/Thbs3/Mgp/Ccdc134/Lrrc17/Igsf10/Ltbp3/Bmpr1a/Slc8a1/Fzd1/Creb3l1/Fgfr1/Igf1/Fgf2/Mmp2/Csgalnact1/Osr2/Glis1/Six2/Bmp1/Gli3/Csf1/Nfix/Spp1/Tmem53/Dnm3os/Sgms2/Vegfa/Sox9…
GO:0002699	positive regulation of immune effector process	199	-0.469343	-1.82639	7.01211e-07	7.01211e-07	2.46436e-05	2263	tags=39%, list=16%, signal=33%	Stxbp2/Casp4/Pld2/Stat5b/Cfp/Lilrb4a/Stx7/Sash3/H2-T22/Dhx58/Tlr7/Tlr4/Tnf/Cd24a/Raet1e/Tap2/Cd27/Nlrp3/Irf5/Tgfb1/Ptprc/Plcg2/Cd86/Nod1/Stap1/Cd37/Il10/Cd40/Mill2/Kmt5b/Irf1/Gata2/Gprc5b/Tlr2/Enpp3/Rapgef1/Sema7a/Nectin2/Nfkbid/P2rx7/H2-K1/Itgb2/Hfe/Syk/B2m/H2-D1/Cd74/Tnfsf13/Ptafr/Myo18a/Fcgr3/Spi1/Fcer1g/Nod2/Ptpn6/Tyrobp/Laptm5/Il1b/Cd300a/Hlx/Trim6/Tek/H2-Q4/Ddx60/Tlr3/H2-Q7/H2-T24/Ccr2/Cd36…
GO:0002275	myeloid cell activation involved in immune response	73	-0.618687	-2.09625	7.10805e-07	7.10805e-07	2.47809e-05	2267	tags=45%, list=16%, signal=38%	Fes/Stxbp2/Abr/Pld2/Lilrb4a/Bcr/Tnf/Sbno2/Cplx2/Plcg2/Lat2/Gata2/Myo1f/Nmi/Enpp3/Itgb2/Dock2/Syk/Dysf/Ifi35/Rac2/Ptafr/Spi1/Fcer1g/Ptpn6/Tyrobp/Lyn/Cd300a/Cd84/Ccr2/Kit/Trem2/Chga
GO:0001562	response to protozoan	33	-0.750189	-2.18415	7.49534e-07	7.49534e-07	2.59237e-05	1651	tags=58%, list=12%, signal=51%	Nras/Cd37/Il10/Cd40/Pf4/Irgm2/Irf8/Igtp/Gbp2/Tgtp1/Slc11a1/Gbp3/Gbp4/Gbp7/Gbp9/Iigp1/Gbp6/Tgtp2/Batf2
GO:0002819	regulation of adaptive immune response	167	-0.493342	-1.8701	8.067e-07	8.067e-07	2.76003e-05	2219	tags=41%, list=16%, signal=35%	Zc3h12a/Rc3h1/Lilrb4a/Tyk2/Stx7/Jak2/Sash3/H2-T22/Nlrp10/Tnf/Cd24a/Raet1e/Nckap1l/Tap2/Nlrp3/Tgfb1/Ptprc/Cr1l/Tnfrsf1b/Cd40/Mill2/H2-DMa/Il20rb/Kmt5b/Irf1/Il4i1/Jak3/Pf4/Pkn1/Nectin2/Dusp22/Nfkbid/P2rx7/H2-K1/Il27ra/Hfe/B2m/H2-D1/Cd74/Ahr/Tnfsf13/H2-Ab1/Fcgr3/Fcer1g/Il7r/Nod2/Ptpn6/Il1b/Hlx/Fcgr2b/Mef2c/Irf7/Vsir/H2-Q4/H2-Q7/H2-T24/Ccr2/Fcgr1/Slc11a1/Gimap5/H2-Q6/H2-T23/Trem2/Samsn1/Cd274/Rsad2/W…
GO:0007093	mitotic cell cycle checkpoint signaling	134	0.521414	1.92184	8.10675e-07	8.10675e-07	2.76003e-05	2570	tags=37%, list=19%, signal=30%	Clspn/Brca1/Stil/Knl1/Ttk/Orc1/Dtl/Spdl1/Ticrr/Rpa2/Spc25/Spc24/Birc5/Blm/Creb3l1/Trip13/Bub1/Cdk1/Incenp/Cdca8/Aurkb/Plk1/Donson/Ndc80/Gen1/Bard1/Zwilch/Cdk5rap3/Nuf2/Klhl22/Cenpe/Anapc15/Brsk1/Ier3/Zwint/Cdk5rap2/Fancd2/Cdc6/Rint1/Atm/Eme1/Chek1/Topbp1/Mad2l1/Rbbp8/Rad50/Haspin/Kntc1/Pidd1
GO:0006897	endocytosis	565	-0.361387	-1.54512	8.27098e-07	8.27098e-07	2.79411e-05	2586	tags=32%, list=19%, signal=27%	Rap1a/Mtmr2/Met/Dgkq/Rara/Sirpb1c/Cap1/Mkln1/Ncf4/Napb/Hap1/Synj1/Nedd4l/Ptk2/Vac14/Synrg/Necap2/Tpcn1/Dab2/Abr/Iqsec1/Nr1h2/Pld2/Becn1/Cfp/Lilrb4a/Fnbp1l/Rin1/Rubcn/Bcr/Bin2/Lgals3/Numb/Myo1g/Ophn1/Scamp1/Ralb/Grk2/Tlr4/Sh3bp4/Rab27a/Dgkd/Coro1a/Ldlrap1/Inpp5f/Pik3c2a/Cbl/Hspg2/Ankrd13a/Cd24a/Ston1/Wasf2/Insr/Nckap1l/Atp9a/Micall1/Dpysl2/Tusc2/Myo6/Rab5b/Tgfb1/Pear1/Sdcbp/Ptprc/Sgip1/Rin3/Plcg2/…
GO:0045132	meiotic chromosome segregation	65	0.626171	2.08435	8.74809e-07	8.74809e-07	2.92415e-05	2014	tags=45%, list=15%, signal=38%	Knl1/4930447C04Rik/Ccne2/Ttk/Ccne1/Aspm/Top2a/M1ap/Trip13/Brip1/Sgo1/Psmc3ip/Plk1/Ndc80/Smc2/Nuf2/Cenpe/Brca2/Ndc1/Espl1/Fbxo5/Zwint/Fancd2/Ncaph/Smc4/Syce2/Atm/Ncapd3/Zcwpw1
GO:0071174	mitotic spindle checkpoint signaling	44	0.699028	2.18205	8.79011e-07	8.79011e-07	2.92415e-05	1612	tags=50%, list=12%, signal=44%	Stil/Knl1/Ttk/Spdl1/Spc25/Spc24/Birc5/Trip13/Bub1/Incenp/Cdca8/Aurkb/Plk1/Ndc80/Gen1/Zwilch/Nuf2/Klhl22/Cenpe/Anapc15/Zwint/Cdk5rap2
GO:0030155	regulation of cell adhesion	633	-0.355339	-1.53078	9.13775e-07	9.13775e-07	3.01677e-05	2381	tags=33%, list=17%, signal=29%	Il2ra/Ptk2/Rhoh/Gata3/Myadm/Lck/Swap70/Peak1/Mmp12/Rras/Dab2/Fes/Lamb2/Pld2/Stat5b/Zc3h12a/Macf1/Rc3h1/H2-Ob/Lilrb4a/Tyk2/Jak2/Runx3/Slk/Zfp608/Lgals3/Apc/Dock8/Dusp1/Cd59a/Sash3/Piezo1/Adam8/Ret/Nck2/Dusp26/Efnb1/H2-T22/Trpv4/Il1rn/Pawr/Prex1/Sema4d/Coro1a/Il6ra/Tnf/Lpxn/Akna/Hspg2/Cd24a/Wnk1/H2-Eb1/Nckap1l/Bmp2/Kank1/Tnfaip8l2/Cdk6/Cd27/Enpp2/Lgals9/Nck1/P2ry12/Nlrp3/Tgfb1/Zmiz1/Ptprc/Triobp/Cd…
GO:0046631	alpha-beta T cell activation	149	-0.515152	-1.9279	9.47934e-07	9.47934e-07	3.10601e-05	2219	tags=36%, list=16%, signal=30%	Zc3h12a/Rc3h1/Lilrb4a/Gpr183/Tyk2/Jak2/Runx3/Fosl2/Sash3/H2-T22/Tcirg1/Il6ra/Cd24a/Nckap1l/Psap/Lgals9/Nlrp3/Tgfb1/Ptprc/Irf1/Jak3/Adora2a/Pf4/Sh3rf1/Cd83/Nfkbid/H2-K1/Il15/Hfe/Dock2/Syk/H2-D1/H2-Ab1/Itpkb/Igtp/Ly9/Cd300a/Hlx/Vsir/H2-Q4/H2-Q7/Il2rg/Ccr2/Irgm1/Prdm1/Gimap5/H2-Q6/H2-T23/Zbtb16/Gimap1/Cd274/Rsad2/Ccr7
GO:0070664	negative regulation of leukocyte proliferation	79	-0.598314	-2.04161	9.90448e-07	9.90448e-07	3.2211e-05	2189	tags=47%, list=16%, signal=40%	Rc3h1/Lilrb4a/H2-T22/Lst1/Pawr/Cd24a/Lgals9/Ccl12/Tgfb1/Cd86/Bmp4/Cd37/Il10/Tnfrsf13b/Il20rb/Lrrc32/Il4i1/Enpp3/Pkn1/H2-K1/H2-Aa/H2-D1/Ptpn6/Tyrobp/Ceacam1/Lyn/Inpp5d/Laptm5/Cd300a/Fcgr2b/Vsir/H2-Q4/H2-Q7/Tnfrsf21/H2-Q6/H2-T23/Cd274
GO:0048871	multicellular organismal-level homeostasis	673	-0.350394	-1.52212	1.03384e-06	1.03384e-06	3.3373e-05	2253	tags=29%, list=16%, signal=25%	Arrdc3/Nr1h2/Wdr37/Stat5b/Wwtr1/Cflar/Adipor1/Sos1/Rc3h1/Lilrb4a/Gpr183/Jak2/Bcr/Tgfbr3/Lnpep/Fosl2/Dnase2a/Apc/Akt3/Tmod3/Adipor2/Sash3/Adam17/Adam8/Ptbp3/Tcirg1/Bbs4/Ctns/Trpv4/Vps54/Tspan9/Il1rn/Kmt2e/Tlr4/Coro1a/Fam210b/Tnf/Foxc1/Sp1/Cd24a/Nbea/Nckap1l/Id1/Sos2/Cdk6/Klf13/Tgfb1/Slc12a2/Sgip1/Pde4b/Lipa/Adrb2/Bmp4/Inpp5k/Ctnnb1/Sorl1/Cd2ap/Nfib/Tnfrsf13b/Apln/Adar/Gpr137b/Tpp1/Rasal2/Dram2/Map…
GO:0003013	circulatory system process	388	-0.394485	-1.6322	1.08488e-06	1.08488e-06	3.47633e-05	2014	tags=28%, list=15%, signal=25%	Plec/Bbs4/Nr3c1/Trpv4/Gpd1l/Npr2/Fyn/Gna12/Grk2/Nampt/Ptpro/Tnf/Htr7/Foxc1/Wnk1/Gnai2/Rps6ka2/Arhgef12/Tgfb1/Gnaq/Rnpep/Nav2/Pde4b/Nr2f2/Adrb2/Heg1/P2ry2/Rgs2/Apln/Itga9/Mef2a/Ctnnbip1/Map2k6/Bloc1s6/Dmd/Abcg2/Tnni2/Adora2a/Gja1/Ehd3/Stc1/Ace/Dock4/Ptprm/Eng/Ncf2/Cacna1h/Kcnj2/Bmp6/Itga1/Ece1/Tjp1/Ahr/Ptafr/Gch1/Mgll/Abcb1b/Agrn/Ptgs1/Atp2b4/Chd7/Vegfc/Ceacam1/Pparg/Prcp/Cldn5/Jup/Ramp2/Cxcr4/C3a…
GO:0002683	negative regulation of immune system process	414	-0.392502	-1.62948	1.19108e-06	1.19108e-06	3.78876e-05	2189	tags=34%, list=16%, signal=29%	Rc3h1/H2-Ob/Lilrb4a/Bcr/Runx3/Zfp608/Lgals3/Dusp1/Cd59a/Trim11/H2-T22/Tapbpl/Dhx58/Masp1/Lst1/Sec14l1/Pawr/Otud4/Samhd1/Tnf/Lpxn/Tmem178/Cd24a/Nckap1l/Tnfaip8l2/Zdhhc18/Tap2/Cdk6/Lgals9/Tgfb1/Ubash3a/Tap1/Ptprc/Ifi206/Cr1l/Rin3/Cd86/Trafd1/Bmp4/Stap1/Cd37/Ctnnb1/Il10/Tnfrsf13b/Cxcl12/Adar/Gpr137b/Ifi207/Hoxa7/Dgkz/Dab2ip/Hspb1/Il20rb/Irf1/Gata2/Mndal/Bst2/Lrrc32/Elf1/Nmi/Fbxo7/Mertk/Il4i1/Jak3/Zf…
GO:0043254	regulation of protein-containing complex assembly	375	-0.399898	-1.64768	1.20394e-06	1.20394e-06	3.8019e-05	2839	tags=33%, list=21%, signal=27%	Fbxl2/Raf1/Jam3/Tirap/Bak1/Rdx/Gba2/Twf2/Icam1/Mtln/Stxbp1/Flii/Creb1/Mavs/Met/Nckap1/Bmf/Napb/Map2/Fscn1/Myadm/Ddx3x/Fes/Nr1h2/Casp4/Camsap2/Arpc3/Cyfip1/Lgals3/Apc/Ep300/Tmod3/Mark4/Eif2ak2/Piezo1/Trim11/Nck2/Bbs4/Msn/Evl/Ralb/Tlr4/Prex1/Arhgef2/Coro1a/Stxbp5/Atat1/Tnf/Tmsb4x/Cd24a/Nckap1l/Kank1/Sptan1/Vasp/Nck1/P2ry12/Tgfb1/Ifi206/Plcg2/Tmod1/Pink1/Fnip2/Sorl1/Ifi207/Ctnnbip1/Dab2ip/Git1/Ssh2/…
GO:0051985	negative regulation of chromosome segregation	47	0.682849	2.16933	1.31052e-06	1.31052e-06	4.1087e-05	1612	tags=49%, list=12%, signal=43%	Knl1/Ttk/Spdl1/Spc25/Spc24/Birc5/Trip13/Bub1/Incenp/Cdca8/Chtf18/Aurkb/Plk1/Ndc80/Gen1/Zwilch/Nuf2/Klhl22/Cenpe/Anapc15/Fbxo5/Zwint/Cdk5rap2
GO:0010965	regulation of mitotic sister chromatid separation	53	0.655774	2.13648	1.37663e-06	1.37663e-06	4.21818e-05	2992	tags=62%, list=22%, signal=49%	Knl1/Ube2c/Ttk/Spdl1/Spc25/Spc24/Birc5/Trip13/Bub1/Incenp/Cdca8/Aurkb/Plk1/Ndc80/Gen1/Zwilch/Nuf2/Klhl22/Cenpe/Cdc16/Anapc15/Fbxo5/Zwint/Cdk5rap2/Atm/Mad2l1/Haspin/Kntc1/Nsmce2/Anapc11/Cdc20/Ccnb1/Bub1b
GO:0033046	negative regulation of sister chromatid segregation	44	0.692902	2.16293	1.39383e-06	1.39383e-06	4.21818e-05	1612	tags=50%, list=12%, signal=44%	Knl1/Ttk/Spdl1/Spc25/Spc24/Birc5/Trip13/Bub1/Incenp/Cdca8/Aurkb/Plk1/Ndc80/Gen1/Zwilch/Nuf2/Klhl22/Cenpe/Anapc15/Fbxo5/Zwint/Cdk5rap2
GO:0033048	negative regulation of mitotic sister chromatid segregation	44	0.692902	2.16293	1.39383e-06	1.39383e-06	4.21818e-05	1612	tags=50%, list=12%, signal=44%	Knl1/Ttk/Spdl1/Spc25/Spc24/Birc5/Trip13/Bub1/Incenp/Cdca8/Aurkb/Plk1/Ndc80/Gen1/Zwilch/Nuf2/Klhl22/Cenpe/Anapc15/Fbxo5/Zwint/Cdk5rap2
GO:0045841	negative regulation of mitotic metaphase/anaphase transition	44	0.692902	2.16293	1.39383e-06	1.39383e-06	4.21818e-05	1612	tags=50%, list=12%, signal=44%	Knl1/Ttk/Spdl1/Spc25/Spc24/Birc5/Trip13/Bub1/Incenp/Cdca8/Aurkb/Plk1/Ndc80/Gen1/Zwilch/Nuf2/Klhl22/Cenpe/Anapc15/Fbxo5/Zwint/Cdk5rap2
GO:2000816	negative regulation of mitotic sister chromatid separation	44	0.692902	2.16293	1.39383e-06	1.39383e-06	4.21818e-05	1612	tags=50%, list=12%, signal=44%	Knl1/Ttk/Spdl1/Spc25/Spc24/Birc5/Trip13/Bub1/Incenp/Cdca8/Aurkb/Plk1/Ndc80/Gen1/Zwilch/Nuf2/Klhl22/Cenpe/Anapc15/Fbxo5/Zwint/Cdk5rap2
GO:0030099	myeloid cell differentiation	397	-0.394547	-1.63471	1.43496e-06	1.43496e-06	4.29192e-05	2360	tags=32%, list=17%, signal=28%	Gata3/Ostm1/Nfe2l1/Tjp2/Hba-a1/Dab2/Fes/Stat5b/Cflar/Lilrb4a/Gpr183/Jak2/Tgfbr3/Fosl2/Dnase2a/Apc/Ep300/Tmod3/Casp8/Adam8/Ptbp3/Tcirg1/Nr3c1/Cdkn1c/Vps54/Kmt2e/Tlr4/Fam210b/Tnf/Tmem178/Vps33a/Sp1/Csf3r/Wasf2/Nckap1l/Bmp2/Sbno2/Cd109/Cdk6/Klf13/Klf10/Ccl3/Tgfb1/Ifi206/Lipa/Bmp4/Stap1/Lbr/Ctnnb1/Adar/Gpr137b/Fgfr3/Ifi207/Ctnnbip1/Hoxa7/Csf3/Gata2/Mndal/Tlr2/Stat1/Zfpm1/Ucp2/Rassf2/Hmga1/Hoxa5/Il15/…
GO:1902105	regulation of leukocyte differentiation	284	-0.422717	-1.69136	1.4379e-06	1.4379e-06	4.29192e-05	2381	tags=34%, list=17%, signal=29%	Il2ra/Rhoh/Gata3/Lck/Tjp2/Fes/Stat5b/Zc3h12a/Sos1/Rc3h1/Lilrb4a/Runx3/Zfp608/Apc/Sash3/Casp8/Adam8/Tnf/Tmem178/Cd24a/Nckap1l/Sos2/Cdk6/Cd27/Lgals9/Klf10/Nlrp3/Ccl3/Tgfb1/Zmiz1/Ptprc/Bmp4/Nfam1/Ctnnb1/Il10/Gpr137b/Fgfr3/Ctnnbip1/H2-DMa/Hoxa7/Hspb1/Irf1/Gata2/Fbxo7/Il4i1/Jak3/Zfpm1/Rassf2/Pf4/Sh3rf1/Cd83/Nfkbid/H2-Aa/Il15/Ccl9/Syk/Csf1r/Rb1/Atp11c/Cd74/Tnfrsf11a/Itpkb/Spi1/Il7r/Ptpn6/Prdm16/Tyrobp/…
GO:0001819	positive regulation of cytokine production	403	-0.390269	-1.62047	1.46915e-06	1.46915e-06	4.35538e-05	2369	tags=34%, list=17%, signal=29%	Casp1/Gata3/Crlf2/Nmb/Mmp12/Ddx3x/Rftn1/Casp4/Stat5b/Mapk11/Tmem106a/Tyk2/Jak2/Sash3/Adam17/Casp8/Eif2ak2/Adam8/H2-T22/Nlrp10/Tbk1/Dhx58/Trpv4/Tlr7/Grk2/Tlr4/Arhgef2/Tank/Il6ra/Tnf/Tlr1/Ly96/Tusc2/Nras/Cd27/Lgals9/Il16/Arrdc4/Nlrp3/Ccl3/Irf5/Tgfb1/Pou2f2/Ptprc/Ifi206/Pde4b/Plcg2/Nod1/Nfam1/Rgcc/Heg1/Unc93b1/Sorl1/Il10/P2ry2/Cd40/Ifi207/Ifngr1/Hspb1/Il20rb/Lpl/Irf1/Ifih1/Mndal/Gprc5b/Hyal2/Tlr2/St…
GO:0006974	DNA damage response	791	0.337248	1.46827	1.59587e-06	1.59587e-06	4.69907e-05	3013	tags=28%, list=22%, signal=23%	Usp51/Twist1/Clspn/Cdca5/Brca1/Nupr1/Eya4/Mcm8/Pclaf/4930447C04Rik/Aunip/Mcm10/Rad51/Ung/Gins2/Tonsl/Esco2/Top2a/Parpbp/Exo1/Dtl/Ticrr/Cdc45/Rpa2/Mif/Blm/Mms22l/Creb3l1/Trip13/Egfr/Steap3/Brip1/Uhrf1/Npas2/Cdk1/Rfc4/Pak1/Fancm/Chaf1a/Ddias/Rrm1/Traip/Fancf/Eya2/Chaf1b/Atad5/Rad18/Nfatc4/Endog/Cenps/Alkbh2/Cip2a/Plk1/E2f1/Neil3/Mcm4/Donson/Cd44/Fanca/Fen1/Recql4/Gen1/Wdhd1/Rfc1/Bcl7c/Swi5/Egln3/Rf…
GO:0002695	negative regulation of leukocyte activation	149	-0.50999	-1.90858	1.63111e-06	1.63111e-06	4.77062e-05	2219	tags=43%, list=16%, signal=36%	Zc3h12a/Rc3h1/Lilrb4a/Runx3/Zfp608/Lgals3/H2-T22/Lst1/Pawr/Cd24a/Tnfaip8l2/Lgals9/Tgfb1/Cd86/Bmp4/Cd37/Il10/Tnfrsf13b/Hspb1/Il20rb/Irf1/Lrrc32/Fbxo7/Mertk/Il4i1/Jak3/Enpp3/Adora2a/Pf4/Pkn1/Dusp22/Nfkbid/H2-K1/H2-Aa/Tafa3/Dusp3/Hfe/H2-D1/Cd74/Ptpn6/Tyrobp/Pglyrp1/Ceacam1/Lyn/Inpp5d/Zbtb46/Pparg/Laptm5/Cd300a/Hlx/Fcgr2b/Cd84/Adgrf5/Vsir/H2-Q4/H2-Q7/Tnfrsf21/Gimap5/H2-Q6/H2-T23/Cd200/Samsn1/Cd274/Nr…
GO:0007186	G protein-coupled receptor signaling pathway	409	-0.388044	-1.61027	1.83535e-06	1.83535e-06	5.3071e-05	1951	tags=32%, list=14%, signal=28%	Adcy9/Vps54/Cxcl10/Gna12/Grk2/Prex1/Dgkd/Rapgef2/Htr7/Foxc1/Wnk1/Insr/Anxa7/Psap/Gnai2/Ccl12/Arhgef12/P2ry12/Ccl3/Gnaq/Pde4b/Mrgpre/Adrb2/Adgre5/Inpp5k/Sorl1/Ackr1/P2ry2/Cxcl12/Rgs2/Ackr3/Apln/Arhgef1/Celsr1/Gpr34/Cish/P2ry6/Dgkz/Rgs16/Git1/Dgkh/Gpr160/Tpra1/Ccrl2/Gprc5b/C5ar1/Git2/Grk3/Adora2a/Pf4/Fzd4/Dgka/Lpar4/Ccr5/Plek/Orai1/Ace/Gpr65/Grk5/Gng11/Gpr132/Adgrl2/Ccl9/Syk/Ccl8/Ece1/Prkd2/Pik3cb/…
GO:0071346	cellular response to type II interferon	99	-0.556713	-1.96838	1.8389e-06	1.8389e-06	5.3071e-05	2369	tags=43%, list=17%, signal=36%	Casp1/Kif16b/Flnb/Stxbp2/Tyk2/Jak2/Slk/Evl/Rab11fip5/Tlr4/Tnf/Vamp3/Ccl12/Ccl3/Parp9/Ifngr1/Irf1/Tlr2/Stat1/Irgm2/Ccl9/Ccl8/H2-Ab1/Cdc42ep2/Myo18a/Mrc1/Irf8/Igtp/Pparg/Gbp2/Nlrc5/H2-Q7/Nos2/Parp14/Irgm1/Gbp3/Gbp4/Gbp5/Gbp7/Gbp9/Gbp6/Was/Ccl6
GO:0051250	negative regulation of lymphocyte activation	131	-0.513979	-1.87418	1.92095e-06	1.92095e-06	5.50742e-05	2219	tags=44%, list=16%, signal=37%	Zc3h12a/Rc3h1/Lilrb4a/Runx3/Zfp608/Lgals3/H2-T22/Lst1/Pawr/Cd24a/Tnfaip8l2/Lgals9/Tgfb1/Cd86/Bmp4/Cd37/Il10/Tnfrsf13b/Hspb1/Il20rb/Irf1/Lrrc32/Fbxo7/Mertk/Il4i1/Jak3/Adora2a/Pf4/Pkn1/Dusp22/Nfkbid/H2-K1/H2-Aa/Dusp3/Hfe/H2-D1/Cd74/Ptpn6/Tyrobp/Pglyrp1/Ceacam1/Lyn/Inpp5d/Laptm5/Cd300a/Hlx/Fcgr2b/Vsir/H2-Q4/H2-Q7/Tnfrsf21/Gimap5/H2-Q6/H2-T23/Samsn1/Cd274/Nrarp
GO:0007127	meiosis I	85	0.590079	2.04634	2.02252e-06	2.02252e-06	5.76075e-05	2116	tags=40%, list=15%, signal=34%	Knl1/4930447C04Rik/Ccne2/Ccne1/Rad51/Top2a/Cks2/M1ap/Birc5/Trip13/Brip1/Psmc3ip/Fancm/Chtf18/Cenps/Dnmt3l/Plk1/Ndc80/Cenpe/Brca2/Ndc1/Espl1/Fbxo5/Rad54l/Rad51ap1/Mybl1/Zwint/Fancd2/Rad54b/Syce2/Atm/Zcwpw1/Eme1/Topbp1
GO:1902100	negative regulation of metaphase/anaphase transition of cell cycle	45	0.679112	2.14373	2.09287e-06	2.09287e-06	5.86956e-05	1612	tags=49%, list=12%, signal=43%	Knl1/Ttk/Spdl1/Spc25/Spc24/Birc5/Trip13/Bub1/Incenp/Cdca8/Aurkb/Plk1/Ndc80/Gen1/Zwilch/Nuf2/Klhl22/Cenpe/Anapc15/Fbxo5/Zwint/Cdk5rap2
GO:1905819	negative regulation of chromosome separation	45	0.679112	2.14373	2.09287e-06	2.09287e-06	5.86956e-05	1612	tags=49%, list=12%, signal=43%	Knl1/Ttk/Spdl1/Spc25/Spc24/Birc5/Trip13/Bub1/Incenp/Cdca8/Aurkb/Plk1/Ndc80/Gen1/Zwilch/Nuf2/Klhl22/Cenpe/Anapc15/Fbxo5/Zwint/Cdk5rap2
GO:0141084	inflammasome-mediated signaling pathway	50	-0.664884	-2.11575	2.10113e-06	2.10113e-06	5.86956e-05	2291	tags=50%, list=17%, signal=42%	Ddx3x/Casp4/Mark4/Eif2ak2/Trim11/Tlr4/Atat1/Nlrp3/Ifi206/Plcg2/Ifi207/Mndal/Irgm2/Ifi209/Igtp/Ifi203/Trim30a/Gbp2/Cd36/Irgm1/Gbp5/Trem2/Ifi213/Ifi208/Kcnj8
GO:0048705	skeletal system morphogenesis	203	0.456437	1.75593	2.13689e-06	2.13689e-06	5.93143e-05	1598	tags=30%, list=12%, signal=27%	Vdr/Twist2/Sfrp1/Prrx2/Comp/Col11a1/Twist1/Osr1/Fbn2/Scx/Bmpr1b/Thbs1/Tmem119/Scube2/Shox2/Barx2/Col27a1/Has2/Enpp1/Col1a1/Tbx15/Tgfb3/Hoxc8/Ror2/Alx4/Col3a1/Ccn2/Thbs3/Ltbp3/Frem1/Prrx1/Wnt9a/Acan/Mmp2/Csgalnact1/Osr2/Six2/Gli3/Nfix/Hoxc9/Vegfa/Sox9/Six1/Pdgfra/Serpinh1/Rab23/Sh3pxd2b/Tmem107/Recql4/Ryk/Tgfb2/Runx2/Mdfi/Mthfd1l/Mmp16/Ext1/Gas1/Carm1/Pcgf2/Fgf18
GO:0002821	positive regulation of adaptive immune response	109	-0.542215	-1.93302	2.19142e-06	2.19142e-06	6.04428e-05	2171	tags=40%, list=16%, signal=34%	Tyk2/Stx7/Jak2/Sash3/H2-T22/Nlrp10/Tnf/Cd24a/Raet1e/Tap2/Nlrp3/Tgfb1/Ptprc/Cd40/Mill2/H2-DMa/Kmt5b/Nectin2/Nfkbid/P2rx7/H2-K1/Il27ra/Hfe/B2m/H2-D1/Cd74/Tnfsf13/H2-Ab1/Fcgr3/Fcer1g/Nod2/Il1b/H2-Q4/H2-Q7/H2-T24/Ccr2/Fcgr1/Slc11a1/Gimap5/H2-Q6/H2-T23/Trem2/Cd274/Rsad2
GO:0031577	spindle checkpoint signaling	48	0.682825	2.17519	2.27562e-06	2.27562e-06	6.23705e-05	1612	tags=48%, list=12%, signal=42%	Stil/Knl1/Ttk/Spdl1/Spc25/Spc24/Birc5/Trip13/Bub1/Incenp/Diaph3/Cdca8/Aurkb/Plk1/Ndc80/Gen1/Zwilch/Nuf2/Klhl22/Cenpe/Anapc15/Zwint/Cdk5rap2
GO:0042590	antigen processing and presentation of exogenous peptide antigen via MHC class I	13	-0.88239	-2.07847	2.33588e-06	2.33588e-06	6.36221e-05	978	tags=77%, list=7%, signal=72%	H2-K1/H2-D1/Fcgr3/Mpeg1/Fcer1g/Mfsd6/H2-Q4/H2-Q7/Fcgr1/H2-Q6
GO:0007094	mitotic spindle assembly checkpoint signaling	42	0.695271	2.15559	2.47978e-06	2.47978e-06	6.67075e-05	2992	tags=67%, list=22%, signal=52%	Knl1/Ttk/Spdl1/Spc25/Spc24/Birc5/Trip13/Bub1/Incenp/Cdca8/Aurkb/Plk1/Ndc80/Gen1/Zwilch/Nuf2/Klhl22/Cenpe/Anapc15/Zwint/Cdk5rap2/Atm/Mad2l1/Haspin/Kntc1/Cdc20/Ccnb1/Bub1b
GO:0071173	spindle assembly checkpoint signaling	42	0.695271	2.15559	2.47978e-06	2.47978e-06	6.67075e-05	2992	tags=67%, list=22%, signal=52%	Knl1/Ttk/Spdl1/Spc25/Spc24/Birc5/Trip13/Bub1/Incenp/Cdca8/Aurkb/Plk1/Ndc80/Gen1/Zwilch/Nuf2/Klhl22/Cenpe/Anapc15/Zwint/Cdk5rap2/Atm/Mad2l1/Haspin/Kntc1/Cdc20/Ccnb1/Bub1b
GO:0007017	microtubule-based process	687	0.33716	1.45792	2.52105e-06	2.52105e-06	6.74017e-05	3214	tags=30%, list=23%, signal=24%	Tubb3/Mgarp/Epha3/Cenph/Kif26b/Ly6k/Gpsm2/Brca1/Obsl1/Stil/Map1a/Pclaf/Mybl2/Prc1/Aunip/Plk4/Kif14/Stmn4/Tubg2/Tubb2b/Ccn2/Aspm/Nek2/Dock7/Wdr35/Spdl1/Spc25/Birc5/Ska1/Ska3/Nphp4/Kif11/Uhrf1/Cdk1/Ccdc8/Cnih2/Rcc1/Rnase10/Kif15/Sgo1/Incenp/Pak1/Dnaaf2/Spag5/Tacc3/Lca5l/Ttll5/Diaph3/Dtnbp1/Cdca8/Cryab/Pard3/Kif20b/Ift20/Dnah12/Haus6/Aurkb/Kif21a/Plk1/Tpx2/Tubb2a/Dlgap5/Kifc1/Mns1/Ndc80/Gen1/Spire1/…
GO:1903706	regulation of hemopoiesis	359	-0.395827	-1.62338	2.7093e-06	2.7093e-06	7.19931e-05	1839	tags=27%, list=13%, signal=24%	Fam210b/Tnf/Tmem178/Cd24a/Csf3r/Nckap1l/Sos2/Cdk6/Cd27/Lgals9/Klf13/Klf10/Nlrp3/Ccl3/Tgfb1/Zmiz1/Ptprc/Bmp4/Nfam1/Ctnnb1/Il10/Gpr137b/Fgfr3/Ctnnbip1/H2-DMa/Hoxa7/Hspb1/Csf3/Irf1/Gata2/Stat1/Fbxo7/Il4i1/Jak3/Zfpm1/Rassf2/Pf4/Sh3rf1/Hoxa5/Cd83/Nfkbid/H2-Aa/Il15/Tcim/Ccl9/Syk/Csf1r/Rb1/Ets1/Atp11c/B2m/Cd74/Tnfrsf11a/Rarg/Lmo2/Itpkb/Spi1/Il7r/Ptpn6/Prdm16/Tyrobp/Pirb/Clec2d/Hoxb8/Sh2b3/Pglyrp1/Ceacam…
GO:0050777	negative regulation of immune response	156	-0.48964	-1.85005	2.97983e-06	2.97983e-06	7.87017e-05	2252	tags=44%, list=16%, signal=37%	Abr/Zc3h12a/Rc3h1/Lilrb4a/Bcr/Lgals3/Cd59a/H2-T22/Dhx58/Masp1/Samhd1/Nckap1l/Zdhhc18/Tap2/Lgals9/Tgfb1/Tap1/Ptprc/Ifi206/Cr1l/Trafd1/Il10/Adar/Ifi207/Il20rb/Irf1/Mndal/Nmi/Il4i1/Jak3/Enpp3/Pf4/Stat2/Dusp22/H2-K1/Il27ra/Hfe/H2-D1/Ifi209/Ahr/Spi1/Trim21/Il7r/Nod2/Ptpn6/Oas1a/Clec2d/Pglyrp1/Ceacam1/Ifi203/Inpp5d/Isg15/Pparg/Cd300a/Hlx/Fcgr2b/Vsir/H2-Q4/Igf2/Nlrc5/H2-Q7/Parp14/Ccr2/H2-Q6/H2-T23/Trem2…
GO:1903037	regulation of leukocyte cell-cell adhesion	280	-0.420089	-1.67569	3.06775e-06	3.06775e-06	8.05358e-05	2233	tags=35%, list=16%, signal=30%	Il2ra/Rhoh/Gata3/Lck/Stat5b/Zc3h12a/Rc3h1/H2-Ob/Lilrb4a/Tyk2/Jak2/Runx3/Zfp608/Lgals3/Dock8/Cd59a/Sash3/Adam8/Nck2/Efnb1/H2-T22/Pawr/Coro1a/Tnf/Cd24a/Wnk1/H2-Eb1/Nckap1l/Tnfaip8l2/Cd27/Lgals9/Nck1/Nlrp3/Tgfb1/Zmiz1/Ptprc/Cd86/Bmp4/Cd37/Cxcl12/H2-DMa/Sele/Hspb1/Il20rb/Irf1/Lrrc32/Il4i1/Jak3/Adora2a/Pf4/Dusp22/Efnb2/Cd83/Nfkbid/H2-K1/H2-Aa/Dusp3/Il15/Itgb2/Hfe/Syk/Ets1/B2m/H2-D1/Cd74/H2-Ab1/Ephb4/I…
GO:0007346	regulation of mitotic cell cycle	437	0.37984	1.59664	3.32986e-06	3.32986e-06	8.68934e-05	2503	tags=28%, list=18%, signal=24%	Rbm46/Cdkn2b/Clspn/Cdca5/Brca1/Obsl1/Rrm2/Stil/Knl1/Ube2c/Meis2/Prkca/Ccne2/Smoc2/Sphk1/Kif14/Ttk/Ccne1/Inhba/Pdxp/Anxa1/Orc1/Dtl/Spdl1/Ticrr/Pdpn/Rpa2/Cks2/Spc25/Spc24/Cks1b/Birc5/Dact1/Blm/Creb3l1/Fgfr1/Trip13/Egfr/Igf1/Bub1/Cdk1/Ccdc8/Hacd1/Rcc1/Pkmyt1/Incenp/Rrm1/Fzd3/Atad5/Cdca8/Ezh2/Cdc25c/Aurkb/Plk1/E2f1/Dlgap5/Donson/Ndc80/Gen1/Bcl7c/Cdca2/Timp2/Cdkn2a/Bard1/Sra1/Zwilch/Cdk5rap3/Nuf2/Klhl…
GO:0042113	B cell activation	217	-0.444628	-1.72933	3.41533e-06	3.41533e-06	8.85932e-05	2346	tags=35%, list=17%, signal=30%	Cd180/Xrcc4/Swap70/Stat5b/Rc3h1/Lilrb4a/Gpr183/Hdac7/Fosl2/Ep300/Sash3/Adam17/Blnk/Tcirg1/Tpd52/Pawr/Tlr4/Skap2/Cd24a/Nckap1l/Slc39a10/Cd27/Tgfb1/Pou2f2/Ptprc/Plcg2/Cd86/Hdac5/Nfam1/Il10/Tnfrsf13b/Lat2/Cd40/Kmt5b/Il4i1/Jak3/Hmga1/Pkn1/Il27ra/Syk/Atp11c/Cd74/Ahr/Tnfsf13/H2-Ab1/Spi1/Il7r/Nod2/Ptpn6/Irf8/Tyrobp/Lyn/Inpp5d/Bst1/Ikzf1/Laptm5/Cd300a/Lfng/Fcgr2b/Mef2c/Prkcb/Mfng/Il2rg/Dll1/Hhex/Hdac9/Tn…
GO:0006954	inflammatory response	590	-0.356497	-1.52795	3.44974e-06	3.44974e-06	8.89562e-05	2150	tags=30%, list=16%, signal=27%	Jak2/Bcr/Hdac7/Fosl2/Mark4/Adam17/Eif2ak2/Trim11/Adam8/Abcd1/H2-T22/Tcirg1/Nlrp10/Nr3c1/Trpv4/Vps54/Pdcd4/Cxcl10/Il1rn/Tlr7/Tlr4/Tspan18/Nampt/Atat1/Tnf/Akna/Tlr1/Cd24a/Bmp2/Ly96/Sbno2/Tnfaip8l2/Tusc2/Socs3/Lgals9/Parp4/Ccl12/Il16/Nlrp3/Ccl3/Irf5/Tgfb1/Alox5ap/Ifi206/Plcg2/Lipa/Hdac5/Stap1/Cd2ap/Il10/Ackr1/Tnfrsf1b/Smad1/Ifi207/Ctnnbip1/Ifngr1/Dab2ip/Git1/Il20rb/Lpl/Dmd/Mndal/Ccrl2/Gprc5b/Hyal2/T…
GO:0051345	positive regulation of hydrolase activity	394	-0.388786	-1.60865	3.49264e-06	3.49264e-06	8.95328e-05	2192	tags=29%, list=16%, signal=25%	Sos1/Rhog/Jak2/Bcr/Dock8/Casp8/Ret/Mmut/Asap2/Tbc1d8/Casp9/Gna12/Prex1/Sema4d/Srgap2/Tank/Rapgef2/Tnf/Chn2/Tbc1d22b/Bmp2/Snx13/Psap/Sos2/Slc39a10/Ccl12/Nlrp3/Ccl3/Tbc1d4/Ptprc/Ifi206/Gmip/Cd86/Nod1/Aph1c/Ric1/Rgp1/Cd40/Fgfr3/Ifi207/Arhgap29/Psme1/Arhgap45/Rgs16/Sele/Rasgrp4/Ralgapa1/Rasgef1b/Mndal/Stat1/Rapgef1/Tbc1d22a/Chn1/Acer2/Hip1/Dock6/Plek/Uaca/Gpr65/Pkp4/Ccl9/Hip1r/Syk/Arhgef7/Ccl8/Itga1/…
GO:0010948	negative regulation of cell cycle process	265	0.419369	1.67841	3.71031e-06	3.71031e-06	9.45563e-05	2504	tags=29%, list=18%, signal=24%	Lif/Cdkn2b/Clspn/Brca1/Stil/Knl1/Ttk/Inhba/Rad51/Nek2/E2f8/Orc1/Dtl/Spdl1/Ticrr/Rpa2/Spc25/Spc24/Birc5/Dact1/Blm/Creb3l1/Trip13/Bub1/Cdk1/Pkmyt1/Incenp/Diaph3/Cdca8/Ezh2/Chtf18/Aurkb/Plk1/E2f1/Kifc1/Donson/Recql4/Ndc80/Gen1/Atf5/Bard1/Zwilch/Cdk5rap3/Nuf2/Klhl22/Cenpe/Brca2/Mdc1/Anapc15/Gas1/Brsk1/Ier3/Fbxo5/Zwint/Npm1/Nubp1/Cdk5rap2/Fancd2/Cdc6/Susd2/Rint1/Grb14/Cdt1/Atm/Eme1/Chek1/Topbp1/Mad2l1…
GO:0042130	negative regulation of T cell proliferation	57	-0.625068	-2.02425	3.84434e-06	3.84434e-06	9.74025e-05	2189	tags=46%, list=16%, signal=39%	Rc3h1/Lilrb4a/H2-T22/Pawr/Cd24a/Lgals9/Tgfb1/Cd86/Bmp4/Cd37/Il20rb/Lrrc32/Il4i1/H2-K1/H2-Aa/H2-D1/Ptpn6/Ceacam1/Laptm5/Vsir/H2-Q4/H2-Q7/Tnfrsf21/H2-Q6/H2-T23/Cd274
GO:0043085	positive regulation of catalytic activity	755	-0.33348	-1.45059	3.96433e-06	3.96433e-06	9.98621e-05	2002	tags=24%, list=15%, signal=22%	Ret/Mmut/Ccny/Acr/Asap2/Tigar/Tbc1d8/Dipk2a/Casp9/Ralb/Gna12/Tlr4/Prex1/Sema4d/Srgap2/Tank/Rapgef2/Il6ra/Tnf/Hmbox1/Chn2/Dcp1b/Tlr1/Tbc1d22b/Cd24a/Pkib/Insr/Bmp2/Snx13/Psap/Sos2/Slc39a10/Lgals9/Sash1/Ccl12/Arrdc4/Nlrp3/Ccl3/Tbc1d4/Ptprc/Ifi206/Gmip/Cd86/Nod1/Aph1c/Adrb2/Ric1/Rgcc/Rgp1/Cd40/Fgfr3/Ifi207/Arhgap29/Psme1/Arhgap45/Dab2ip/Rgs16/Sele/Rasgrp4/Map2k6/Ralgapa1/Rasgef1b/Mndal/Gprc5b/Stat1/P…
GO:0033047	regulation of mitotic sister chromatid segregation	51	0.657053	2.10654	4.03977e-06	4.03977e-06	0.000101111	1612	tags=45%, list=12%, signal=40%	Knl1/Ttk/Spdl1/Spc25/Spc24/Birc5/Trip13/Bub1/Cdk1/Incenp/Cdca8/Aurkb/Plk1/Ndc80/Gen1/Zwilch/Nuf2/Klhl22/Cenpe/Anapc15/Fbxo5/Zwint/Cdk5rap2
GO:0050853	B cell receptor signaling pathway	43	-0.688723	-2.10091	4.06033e-06	4.06033e-06	0.000101111	2936	tags=65%, list=21%, signal=51%	Mapk1/Bcar1/Bcl2/Cd81/Lck/Rftn1/Sos1/Blnk/Lpxn/Nckap1l/Slc39a10/Ptprc/Plcg2/Nfam1/Stap1/Lat2/Plekha1/Syk/Ptpn6/Lyn/Cd300a/Tec/Mef2c/Klhl6/Prkcb/Prkch/Cd38/Ighm
GO:0044546	NLRP3 inflammasome complex assembly	38	-0.694979	-2.07822	4.15172e-06	4.15172e-06	0.000102196	2291	tags=50%, list=17%, signal=42%	Ptpn22/Fbxl2/Mavs/Ddx3x/Casp4/Mark4/Eif2ak2/Tlr4/Atat1/Nlrp3/Plcg2/Irgm2/Igtp/Trim30a/Cd36/Irgm1/Gbp5/Trem2/Kcnj8
GO:0140632	canonical inflammasome complex assembly	38	-0.694979	-2.07822	4.15172e-06	4.15172e-06	0.000102196	2291	tags=50%, list=17%, signal=42%	Ptpn22/Fbxl2/Mavs/Ddx3x/Casp4/Mark4/Eif2ak2/Tlr4/Atat1/Nlrp3/Plcg2/Irgm2/Igtp/Trim30a/Cd36/Irgm1/Gbp5/Trem2/Kcnj8
GO:1901988	negative regulation of cell cycle phase transition	228	0.437791	1.70916	4.17425e-06	4.17425e-06	0.000102196	2504	tags=30%, list=18%, signal=25%	Cdkn2b/Clspn/Brca1/Stil/Knl1/Ttk/Inhba/Rad51/Orc1/Dtl/Spdl1/Ticrr/Rpa2/Spc25/Spc24/Birc5/Dact1/Blm/Creb3l1/Trip13/Bub1/Cdk1/Pkmyt1/Incenp/Diaph3/Cdca8/Ezh2/Aurkb/Plk1/E2f1/Donson/Ndc80/Gen1/Atf5/Bard1/Zwilch/Cdk5rap3/Nuf2/Klhl22/Cenpe/Brca2/Mdc1/Anapc15/Gas1/Brsk1/Ier3/Fbxo5/Zwint/Cdk5rap2/Fancd2/Cdc6/Susd2/Rint1/Cdt1/Atm/Eme1/Chek1/Topbp1/Mad2l1/Pkd2/Rbbp8/Rad1/Rad50/Acvr1/Haspin/Rnaseh2b/Kntc1/…
GO:0007423	sensory organ development	431	0.375519	1.57353	4.50377e-06	4.50377e-06	0.000109648	1044	tags=19%, list=8%, signal=18%	Dio3/Rbp4/Twist2/Col8a2/Col8a1/Cxcl14/Mfap5/Cthrc1/Prrx2/Aldh1a3/Aldh1a2/Lif/Col11a1/Smoc1/Lmx1b/Twist1/Osr1/Ephb2/Bmpr1b/Kcnma1/Lrig3/Bmper/Fzd2/Meis3/Col5a1/Tulp1/Eya4/Enpp1/Gng8/Thy1/Mfap2/Cyp1b1/Col5a2/Wnt5a/Meis2/Fat1/Tenm3/Bnc2/Ror2/Inhba/Ptn/Fjx1/Prrx1/Bfsp1/Megf11/Rcn1/Mab21l2/Fgfr1/Egfr/Igf1/Nphp4/Sobp/Fgf2/Ahi1/Tbx18/Fzd5/Tsku/Osr2/Ttc39c/C3/Ptk7/Six2/Ttll5/Diaph3/Gli3/Fzd3/Cryab/Nfix/A…
GO:0043436	oxoacid metabolic process	635	0.344815	1.4833	4.95304e-06	4.95304e-06	0.000119916	2372	tags=26%, list=17%, signal=23%	Bcat1/Aldh1a3/Aldh1a2/Slc1a3/Slc16a3/P4ha3/Twist1/Rbp1/Echdc2/Phgdh/Ptges/Ephx2/Ddah1/Ptgis/Azin2/Bdh2/Plod2/Gfpt2/Brca1/Ptgr1/Pla2g4a/Dpep1/Nupr1/Crabp2/Enpp1/Cyp1b1/P4ha2/Col6a1/Ass1/Avpr1a/Cacna1a/Sphk1/Pycr1/Ptgs2/Aldh1l2/Hk2/C1qtnf2/Anxa1/Acot11/Slc27a6/P4ha1/Pdpn/Gcat/Sdsl/Me1/Mif/Sardh/Fgfr1/Igf1/Aldh18a1/Ugdh/Tpi1/Hacd1/Pdk3/Dhfr/P4hb/Galk1/Pgk1/Csgalnact1/C3/Abat/Pgam1/Hpgd/Dse/Fasn/Dsel…
GO:0044770	cell cycle phase transition	472	0.367752	1.55657	5.22158e-06	5.22158e-06	0.000125719	2504	tags=27%, list=18%, signal=23%	Cdkn2b/Clspn/Cdca5/Brca1/Rrm2/Stil/Knl1/Ube2c/Ccne2/Rhou/Kif14/Ttk/Ccne1/Inhba/Rad51/Anxa1/Orc1/Dtl/Spdl1/Ticrr/Pdpn/Rpa2/Cks2/Spc25/Spc24/Cks1b/Birc5/Dact1/Blm/Creb3l1/Trip13/Mlf1/Egfr/Bub1/Cdk1/Hacd1/Rcc1/Pkmyt1/Incenp/Tacc3/Ccna2/Rrm1/Diaph3/Atad5/Cdca8/Nfix/Ezh2/Cdc25c/Tcf19/Cdk14/Aurkb/Plk1/E2f1/Mastl/Nasp/Donson/Ndc80/Gen1/Bcl7c/Cdkn2a/Atf5/Bard1/Zwilch/Cdk5rap3/Iqgap3/Nuf2/Klhl22/Cenpe/Skp…
GO:0002366	leukocyte activation involved in immune response	222	-0.440493	-1.72438	5.45991e-06	5.45991e-06	0.000130735	2360	tags=33%, list=17%, signal=28%	Gata3/Cd180/Xrcc4/Swap70/Fes/Stxbp2/Abr/Pld2/Zc3h12a/Rc3h1/Lilrb4a/Gpr183/Bcr/Lgals3/Tlr4/Rab27a/Coro1a/Il6ra/Tnf/Nckap1l/Sbno2/Lgals9/Cplx2/Nlrp3/Tgfb1/Ptprc/Plcg2/Il10/Lat2/Cd40/Kmt5b/Irf1/Gata2/Myo1f/Nmi/Jak3/Enpp3/Pf4/Nfkbid/Il27ra/Itgb2/Dock2/Syk/Dysf/Cd74/Tnfsf13/Ifi35/Rac2/Ptafr/Spi1/Fcer1g/Ptpn6/Irf8/Tyrobp/Slfn2/Pglyrp1/Lyn/Ly9/Cd300a/Hlx/Lfng/Cd84/Lcp1/Mfng/Dll1/Ccr2/Slc11a1/Kit/Icosl/T…
GO:0046634	regulation of alpha-beta T cell activation	97	-0.548812	-1.92049	5.65905e-06	5.65905e-06	0.000134763	2381	tags=45%, list=17%, signal=38%	Il2ra/Gata3/Zc3h12a/Rc3h1/Lilrb4a/Tyk2/Jak2/Runx3/Sash3/H2-T22/Cd24a/Nckap1l/Lgals9/Nlrp3/Tgfb1/Ptprc/Irf1/Jak3/Adora2a/Pf4/Sh3rf1/Cd83/Nfkbid/H2-K1/Hfe/Syk/H2-D1/H2-Ab1/Itpkb/Cd300a/Hlx/Vsir/H2-Q4/H2-Q7/Il2rg/Ccr2/Irgm1/Prdm1/Gimap5/H2-Q6/H2-T23/Zbtb16/Cd274/Ccr7
GO:1901990	regulation of mitotic cell cycle phase transition	303	0.411814	1.67294	5.76006e-06	5.76006e-06	0.000136311	2503	tags=30%, list=18%, signal=25%	Cdkn2b/Clspn/Cdca5/Brca1/Rrm2/Stil/Knl1/Ube2c/Ccne2/Kif14/Ttk/Ccne1/Inhba/Anxa1/Orc1/Dtl/Spdl1/Ticrr/Pdpn/Rpa2/Spc25/Spc24/Birc5/Dact1/Blm/Creb3l1/Trip13/Egfr/Bub1/Cdk1/Hacd1/Pkmyt1/Incenp/Rrm1/Atad5/Cdca8/Ezh2/Cdc25c/Aurkb/Plk1/E2f1/Donson/Ndc80/Gen1/Bcl7c/Cdkn2a/Bard1/Zwilch/Cdk5rap3/Nuf2/Klhl22/Cenpe/Nek6/Smarcc1/Cdc16/Anapc15/Dpf1/Brsk1/Ier3/Fbxo5/Tert/Zwint/Cdk5rap2/Sass6/Ddr2/Cdc6/Apex1/Lmn…
GO:0001914	regulation of T cell mediated cytotoxicity	33	-0.720414	-2.09746	5.81657e-06	5.81657e-06	0.000136311	2158	tags=58%, list=16%, signal=49%	Stx7/H2-T22/Raet1e/Nckap1l/Tap2/Ptprc/Mill2/Nectin2/P2rx7/H2-K1/Hfe/B2m/H2-D1/Il7r/H2-Q4/H2-Q7/H2-T24/H2-Q6/H2-T23
GO:1902107	positive regulation of leukocyte differentiation	173	-0.461378	-1.76008	5.87556e-06	5.87556e-06	0.000136311	2626	tags=37%, list=19%, signal=30%	Nedd9/Creb1/Rara/Arid1a/Smarcd1/Il2ra/Rhoh/Gata3/Lck/Fes/Stat5b/Lilrb4a/Runx3/Sash3/Casp8/Adam8/Tnf/Nckap1l/Cd27/Lgals9/Klf10/Nlrp3/Ccl3/Tgfb1/Zmiz1/Ptprc/Il10/Ctnnbip1/H2-DMa/Irf1/Il4i1/Cd83/Nfkbid/H2-Aa/Il15/Ccl9/Syk/Csf1r/Rb1/Atp11c/Cd74/Tnfrsf11a/Itpkb/Spi1/Il7r/Tyrobp/Inpp5d/Flt3l/Zbtb46/Ikzf1/Sox13/Hlx/Kitl/Vsir/Il2rg/Ccr2/Gimap5/Pik3r6/Zbtb16/Hcls1/Trem2/Car2/Ccr7/Tesc
GO:1903708	positive regulation of hemopoiesis	173	-0.461378	-1.76008	5.87556e-06	5.87556e-06	0.000136311	2626	tags=37%, list=19%, signal=30%	Nedd9/Creb1/Rara/Arid1a/Smarcd1/Il2ra/Rhoh/Gata3/Lck/Fes/Stat5b/Lilrb4a/Runx3/Sash3/Casp8/Adam8/Tnf/Nckap1l/Cd27/Lgals9/Klf10/Nlrp3/Ccl3/Tgfb1/Zmiz1/Ptprc/Il10/Ctnnbip1/H2-DMa/Irf1/Il4i1/Cd83/Nfkbid/H2-Aa/Il15/Ccl9/Syk/Csf1r/Rb1/Atp11c/Cd74/Tnfrsf11a/Itpkb/Spi1/Il7r/Tyrobp/Inpp5d/Flt3l/Zbtb46/Ikzf1/Sox13/Hlx/Kitl/Vsir/Il2rg/Ccr2/Gimap5/Pik3r6/Zbtb16/Hcls1/Trem2/Car2/Ccr7/Tesc
GO:0050868	negative regulation of T cell activation	102	-0.53661	-1.90587	5.88048e-06	5.88048e-06	0.000136311	2219	tags=44%, list=16%, signal=37%	Zc3h12a/Rc3h1/Lilrb4a/Runx3/Zfp608/Lgals3/H2-T22/Pawr/Cd24a/Tnfaip8l2/Lgals9/Tgfb1/Cd86/Bmp4/Cd37/Hspb1/Il20rb/Irf1/Lrrc32/Il4i1/Jak3/Adora2a/Pf4/Dusp22/Nfkbid/H2-K1/H2-Aa/Dusp3/Hfe/H2-D1/Cd74/Ptpn6/Ceacam1/Laptm5/Cd300a/Hlx/Vsir/H2-Q4/H2-Q7/Tnfrsf21/Gimap5/H2-Q6/H2-T23/Cd274/Nrarp
GO:0006310	DNA recombination	265	0.414679	1.65964	5.98324e-06	5.98324e-06	0.000137959	2430	tags=29%, list=18%, signal=24%	Usp51/Brca1/Mcm8/4930447C04Rik/Aunip/Rad51/Ung/Gins2/Tonsl/Top2a/Parpbp/Exo1/Cdc45/Rpa2/Blm/Mms22l/Trip13/Brip1/Psmc3ip/Fancm/Atad5/Ezh2/Rad18/Chtf18/Cenps/Mcm4/Recql4/Gen1/Swi5/Bard1/Xrcc5/Mcm5/Hspd1/Lig1/Mcm7/Brca2/Sfr1/Helb/Mcm2/Msh6/Mcm3/Rad54l/Rad51ap1/Zgrf1/Zswim7/Parp3/Fancd2/Mcm6/Apex1/Xrcc2/Rad54b/Msh3/Gins4/Morf4l2/Polq/Cdc7/Rmi2/Spidr/Atm/Zcwpw1/Nhej1/Nsd2/Bcl6/Eme1/Ooep/Rpa1/Chek1/Top…
GO:0007051	spindle organization	177	0.467364	1.77355	6.24408e-06	6.24408e-06	0.000143216	3190	tags=40%, list=23%, signal=31%	Cenph/Gpsm2/Stil/Mybl2/Prc1/Aunip/Tubg2/Aspm/Nek2/Spc25/Birc5/Kif11/Uhrf1/Rcc1/Incenp/Spag5/Tacc3/Cdca8/Haus6/Aurkb/Plk1/Tpx2/Dlgap5/Kifc1/Ndc80/Kif4/Nuf2/Rangrf/Cenpe/Pde4dip/Ntmt1/Ccsap/Espl1/Racgap1/Fbxo5/Sass6/Parp3/Ranbp1/Sac3d1/Poldip2/Haus8/Haus1/Tubg1/Haus4/Ddb1/Kifc5b/Efhc1/Bora/Tubgcp2/Haus7/Kpnb1/Poc1a/Kif2a/Mlh1/Hdac3/Wdr62/Tubgcp4/Rps3/Tubb5/Cdc20/Ccnb1/Smc3/Map9/Haus3/Cep97/Nup62/Pl…
GO:0003006	developmental process involved in reproduction	599	0.344277	1.47411	6.3566e-06	6.3566e-06	0.000145033	1571	tags=18%, list=11%, signal=17%	Vdr/Rbp4/Gjb5/Sfrp1/Fst/Rbm46/Sfrp2/Serpinf1/Lif/Ptx3/Osr1/Tnc/Fgf7/Serpine1/Ptgis/Rpl39l/Bmpr1b/Tmem119/Cyp51/Ndn/Tnfaip6/Pla2g4a/Tyro3/Nupr1/Mdk/Runx1/Ccdc136/Wnt5a/Col6a1/4930447C04Rik/Adamts2/B4galnt1/Il11ra1/Plk4/Ptgs2/Ror2/Inhba/Zfpm2/Rhobtb3/Ptn/Aspm/E2f8/Bmpr1a/H19/Angpt1/M1ap/Pgm3/Trip13/Igf1/Brip1/Mmp2/Spaca1/Meg3/Sulf1/Rnase10/Fzd5/C3/Ddias/Ptprn/Fancf/Ttll5/Cntfr/Csf1/Pafah1b3/Nkd1/Ra…
GO:0016064	immunoglobulin mediated immune response	107	-0.516157	-1.84937	6.50029e-06	6.50029e-06	0.000147539	1567	tags=35%, list=11%, signal=31%	Tgfb1/Pou2f2/Ptprc/Cr1l/Cd40/H2-DMa/Kmt5b/Nectin2/Il21r/H2-K1/Il27ra/H2-D1/Cd74/Tnfsf13/H2-Ab1/Fcgr3/Fcer1g/Nod2/Ptpn6/Inpp5d/C1qb/C1qa/Fcgr2b/Csf2rb2/Irf7/C1qc/H2-Q4/H2-Q7/Fcgr1/Gimap5/H2-Q6/H2-T23/Icosl/Trem2/Csf2rb/Fcgr4/Ighm
GO:0019221	cytokine-mediated signaling pathway	343	-0.392849	-1.60194	6.62629e-06	6.62629e-06	0.000148278	2429	tags=36%, list=18%, signal=30%	Rbck1/Ebi3/Gab1/Il2ra/Casp1/Crlf2/Mmp12/Tjp2/Fkbp1a/Irak2/Casp4/Rnf31/Stat5b/Irak4/Adipor1/Lilrb4a/Tyk2/Jak2/Adipor2/Adam17/Bbs4/Tbk1/Cxcl10/Il1rn/Otud4/Samhd1/Tank/Il6ra/Tnf/Foxc1/Cd24a/Csf3r/Wnk1/Rffl/Ccl12/Il16/Ccl3/Irf5/Hipk1/Ptprc/Ifitm1/Stap1/Parp9/Oasl1/Ackr1/Cxcl12/Actn4/Ackr3/Adar/Lifr/Ifitm3/Ifngr1/Il20rb/Csf3/Irf1/Ifih1/Ccrl2/Crebrf/Stat1/Tifa/Trim56/Jak3/Ikbkb/Pf4/Stat2/Mapk3/Oas2/Il2…
GO:0051303	establishment of chromosome localization	97	0.54327	1.91609	6.65575e-06	6.65575e-06	0.000148278	2302	tags=35%, list=17%, signal=29%	Cdca5/Knl1/Kif14/Nek2/Spdl1/Spc25/Spc24/Birc5/Ska1/Ska3/Cenpq/Sgo1/Incenp/Spag5/Ect2/Cdca8/Dsn1/Aurkb/Kifc1/Ndc80/Nuf2/Cenpe/Kif22/Brca2/Fam83d/Racgap1/Zwint/Gem/Cdt1/Atm/Mis12/Pmf1/Kifc5b/Cenpf
GO:0001916	positive regulation of T cell mediated cytotoxicity	27	-0.749398	-2.09843	6.65621e-06	6.65621e-06	0.000148278	2158	tags=63%, list=16%, signal=53%	Stx7/H2-T22/Raet1e/Tap2/Ptprc/Mill2/Nectin2/P2rx7/H2-K1/Hfe/B2m/H2-D1/H2-Q4/H2-Q7/H2-T24/H2-Q6/H2-T23
GO:0001788	antibody-dependent cellular cytotoxicity	12	-0.88912	-2.05083	6.66891e-06	6.66891e-06	0.000148278	978	tags=83%, list=7%, signal=77%	H2-K1/H2-D1/Fcgr3/Fcgr2b/H2-Q4/H2-Q7/Fcgr1/H2-Q6/H2-T23/Fcgr4
GO:0140014	mitotic nuclear division	240	0.431539	1.69536	7.01709e-06	7.01709e-06	0.000155227	2104	tags=30%, list=15%, signal=26%	Cdca5/Obsl1/Knl1/Ube2c/Cenpk/Mybl2/Prc1/Sphk1/Kif14/Ttk/Tubg2/Pdxp/Nek2/Spdl1/Spc25/Spc24/Birc5/Ska1/Ncapg2/Trip13/Ska3/Igf1/Bub1/Ncapg/Kif11/Uhrf1/Cdk1/Ccdc8/Rcc1/Incenp/Spag5/Cdca8/Nfix/Cenpi/Aurkb/Plk1/Tpx2/Kifc1/Ndc80/Gen1/Cdca2/Zwilch/Smc2/Nuf2/Klhl22/Rangrf/Cenpe/Kif22/Mki67/Cdc16/Anapc15/Ccsap/Espl1/Racgap1/Fbxo5/Zwint/Cdk5rap2/Ranbp1/Ncaph/Poldip2/Smc4/Tubg1/Cul7/Cdt1/Pebp1/Atm/Ncapd3/Kif…
GO:1901987	regulation of cell cycle phase transition	385	0.382751	1.5853	7.20814e-06	7.20814e-06	0.000158648	2504	tags=28%, list=18%, signal=23%	Cdkn2b/Clspn/Cdca5/Brca1/Rrm2/Stil/Knl1/Ube2c/Ccne2/Kif14/Ttk/Ccne1/Inhba/Rad51/Anxa1/Orc1/Dtl/Spdl1/Ticrr/Pdpn/Rpa2/Spc25/Spc24/Birc5/Dact1/Blm/Creb3l1/Trip13/Mlf1/Egfr/Bub1/Cdk1/Hacd1/Pkmyt1/Incenp/Rrm1/Diaph3/Atad5/Cdca8/Ezh2/Cdc25c/Aurkb/Plk1/E2f1/Donson/Ndc80/Gen1/Bcl7c/Cdkn2a/Atf5/Bard1/Zwilch/Cdk5rap3/Nuf2/Klhl22/Cenpe/Nek6/Smarcc1/Brca2/Mdc1/Fam83d/Cdc16/Anapc15/Dpf1/Gas1/Brsk1/Ier3/Fbxo5…
GO:0001911	negative regulation of leukocyte mediated cytotoxicity	26	-0.753396	-2.09735	8.09062e-06	8.09062e-06	0.000176765	2020	tags=69%, list=15%, signal=59%	H2-T22/Nckap1l/Tap2/Lgals9/Tgfb1/Tap1/Ptprc/H2-K1/H2-D1/Il7r/Clec2d/Ceacam1/H2-Q4/Igf2/Cx3cr1/H2-Q7/H2-Q6/H2-T23
GO:0000226	microtubule cytoskeleton organization	504	0.354282	1.50291	8.11238e-06	8.11238e-06	0.000176765	3410	tags=34%, list=25%, signal=27%	Tubb3/Epha3/Cenph/Gpsm2/Brca1/Obsl1/Stil/Map1a/Pclaf/Mybl2/Prc1/Aunip/Plk4/Stmn4/Tubg2/Tubb2b/Ccn2/Aspm/Nek2/Dock7/Spdl1/Spc25/Birc5/Ska1/Ska3/Kif11/Uhrf1/Cdk1/Ccdc8/Rcc1/Sgo1/Incenp/Pak1/Dnaaf2/Spag5/Tacc3/Ttll5/Diaph3/Cdca8/Cryab/Pard3/Haus6/Aurkb/Plk1/Tpx2/Tubb2a/Dlgap5/Kifc1/Mns1/Ndc80/Gen1/Spire1/Clip4/Mid1/Cep295nl/Atf5/BC034090/Kif4/Nuf2/Rangrf/Cenpe/Armc2/Alms1/Pde4dip/Ank3/Brca2/Tuba1a/S…
GO:0006082	organic acid metabolic process	639	0.34289	1.47414	8.33456e-06	8.33456e-06	0.000180702	2372	tags=26%, list=17%, signal=23%	Bcat1/Aldh1a3/Aldh1a2/Slc1a3/Slc16a3/P4ha3/Twist1/Rbp1/Echdc2/Phgdh/Ptges/Ephx2/Ddah1/Ptgis/Azin2/Bdh2/Plod2/Gfpt2/Brca1/Ptgr1/Pla2g4a/Dpep1/Nupr1/Crabp2/Enpp1/Cyp1b1/P4ha2/Col6a1/Ass1/Avpr1a/Cacna1a/Sphk1/Pycr1/Ptgs2/Aldh1l2/Hk2/C1qtnf2/Anxa1/Acot11/Slc27a6/P4ha1/Pdpn/Gcat/Sdsl/Me1/Mif/Sardh/Fgfr1/Igf1/Aldh18a1/Ugdh/Tpi1/Hacd1/Pdk3/Dhfr/P4hb/Galk1/Pgk1/Csgalnact1/C3/Abat/Pgam1/Hpgd/Dse/Fasn/Dsel…
GO:0003158	endothelium development	125	-0.510375	-1.85876	8.44378e-06	8.44378e-06	0.000182164	2763	tags=53%, list=20%, signal=43%	Zdhhc21/Edn1/Rdx/Tmem100/Icam1/Btg1/Rap1a/Bmpr2/Met/Itgax/Myadm/Tjp2/Krit1/Clic4/Foxj2/Msn/Cxcl10/Rapgef2/Tnf/Id1/Nr2f2/Lipa/Bmp4/Heg1/Ctnnb1/Cd2ap/Atoh8/Hey1/Bloc1s6/Dmd/Ikbkb/Rapgef1/Fzd4/Col18a1/Stc1/Bmp6/Notch1/Apold1/Tjp1/Alox12/Hoxb5/Abcb1b/Sox17/Ceacam1/Acvr2b/Il1b/Afdn/Plcb1/Cldn5/Cxcr4/Robo4/Pecam1/Rapgef3/Notch4/Pdgfb/Dll1/Pde2a/Tie1/Ppp1r16b/Cdh5/Kdr/F11r/Ednrb/Dll4/Sox18/Xdh
GO:0033045	regulation of sister chromatid segregation	95	0.541772	1.91037	8.54552e-06	8.54552e-06	0.000183451	2001	tags=36%, list=15%, signal=31%	Knl1/Ube2c/Ttk/Spdl1/Spc25/Spc24/Birc5/Trip13/Bub1/Cdk1/Incenp/Tacc3/Cdca8/Aurkb/Plk1/Ndc80/Gen1/Bcl7c/Zwilch/Nuf2/Klhl22/Cenpe/Nek6/Smarcc1/Cdc16/Anapc15/Dpf1/Fbxo5/Zwint/Cdk5rap2/Cdc6/Rmi2/Phf10/Atm
GO:0060348	bone development	188	0.45961	1.75003	8.80828e-06	8.80828e-06	0.000188164	2046	tags=32%, list=15%, signal=28%	Lox/Comp/Ccn4/Twist1/Tnfsf11/Scx/Bmpr1b/Thbs1/Tmem119/P3h1/Scube2/Fbn1/Shox2/Col27a1/Has2/Tnn/Bgn/Enpp1/Col1a1/Col6a1/Ogn/Bnc2/Evc/Col3a1/Thbs3/Vkorc1/Lrrc17/Ltbp3/Frem1/Igf1/Sulf2/Sulf1/Csgalnact1/Osr2/Gli3/Nfix/Ppib/Sox9/Serpinh1/Rab23/Sh3pxd2b/Tmem107/Slc38a10/Runx2/Mmp16/Ext1/Mcph1/Adamts12/Carm1/Src/Fgf18/Ddr2/Mmp14/Sparc/Chsy1/Miga2/Fam20c/Nsd2/Ecm1/Cited2
GO:0032508	DNA duplex unwinding	42	0.679197	2.10576	8.88062e-06	8.88062e-06	0.000188784	1801	tags=43%, list=13%, signal=37%	Mcm8/Rad51/Gins2/Anxa1/Top2a/Cdc45/Blm/Gins3/Mcm4/Recql4/Mcm5/Mcm7/Mcm2/Ddx1/Mcm3/Mcm6/Gins4/Gins1
GO:0006812	monoatomic cation transport	588	-0.342818	-1.47012	8.93975e-06	8.93975e-06	0.000189119	2015	tags=23%, list=15%, signal=21%	Tcirg1/Rab11b/Slc4a8/Trpv4/Cxcl10/Gpd1l/Fyn/Fxyd5/Pawr/Plcg1/Tspan18/Slc30a4/Coro1a/Mcoln1/Pik3c2a/Abcb7/Chrnb1/Wnk1/Atp6v0d2/Atox1/Slc39a10/Gnai2/Il16/P2ry12/Stac/Tgfb1/Atp6v0a1/Slc12a2/Ptprc/Gnaq/Pde4b/Plcg2/Adrb2/Bmp4/Cacng1/Inpp5k/Ctnnb1/Cxcl12/Atp1b3/Mylk/Hecw2/Slc10a6/Dmd/Clcn3/Cnksr3/Klhl3/Myo1b/Slc31a2/Jak3/Ikbkb/Tmem37/Slc24a5/Nipal3/Adora2a/Steap4/Gja1/Slc6a6/Klhl24/Ehd3/Plcb4/Ccr5/Slc1…
GO:0045930	negative regulation of mitotic cell cycle	206	0.437226	1.68739	9.06491e-06	9.06491e-06	0.00019084	1679	tags=24%, list=12%, signal=21%	Rbm46/Cdkn2b/Clspn/Brca1/Stil/Knl1/Ttk/Inhba/Orc1/Dtl/Spdl1/Ticrr/Rpa2/Spc25/Spc24/Birc5/Dact1/Blm/Creb3l1/Trip13/Egfr/Bub1/Cdk1/Pkmyt1/Incenp/Fzd3/Cdca8/Ezh2/Aurkb/Plk1/Donson/Ndc80/Gen1/Timp2/Bard1/Zwilch/Cdk5rap3/Nuf2/Klhl22/Cenpe/Anapc15/Gas1/Brsk1/Ier3/Fbxo5/Zwint/Cdk5rap2/Fancd2/Cdc6
GO:1902099	regulation of metaphase/anaphase transition of cell cycle	82	0.559501	1.93031	9.35295e-06	9.35295e-06	0.000195957	2992	tags=49%, list=22%, signal=38%	Knl1/Ube2c/Ttk/Spdl1/Spc25/Spc24/Birc5/Trip13/Bub1/Incenp/Cdca8/Aurkb/Plk1/Ndc80/Gen1/Bcl7c/Zwilch/Nuf2/Klhl22/Cenpe/Nek6/Smarcc1/Cdc16/Anapc15/Dpf1/Fbxo5/Zwint/Cdk5rap2/Cdc6/Phf10/Atm/Mad2l1/Haspin/Kntc1/Bcl7a/Nsmce2/Anapc11/Cdc20/Ccnb1/Bub1b
GO:0031342	negative regulation of cell killing	29	-0.741774	-2.10218	9.41783e-06	9.41783e-06	0.000196373	2082	tags=66%, list=15%, signal=56%	Cd59a/H2-T22/Nckap1l/Tap2/Lgals9/Tgfb1/Tap1/Ptprc/H2-K1/H2-D1/Il7r/Clec2d/Ceacam1/H2-Q4/Igf2/Cx3cr1/H2-Q7/H2-Q6/H2-T23
GO:0002707	negative regulation of lymphocyte mediated immunity	44	-0.66597	-2.05878	9.74334e-06	9.74334e-06	0.000202193	1711	tags=59%, list=12%, signal=52%	Nckap1l/Tap2/Lgals9/Tgfb1/Tap1/Ptprc/Cr1l/Il20rb/Il4i1/Dusp22/H2-K1/Hfe/H2-D1/Ahr/Il7r/Nod2/Ptpn6/Clec2d/Ceacam1/Fcgr2b/Vsir/H2-Q4/Igf2/H2-Q7/H2-Q6/H2-T23
GO:0050000	chromosome localization	102	0.53028	1.8788	1.02059e-05	1.02059e-05	0.00021026	2302	tags=33%, list=17%, signal=28%	Cdca5/Knl1/Kif14/Nek2/Spdl1/Spc25/Spc24/Birc5/Ska1/Ska3/Cenpq/Sgo1/Incenp/Spag5/Ect2/Cdca8/Dsn1/Aurkb/Kifc1/Ndc80/Nuf2/Cenpe/Kif22/Brca2/Fam83d/Racgap1/Zwint/Gem/Cdt1/Atm/Mis12/Pmf1/Kifc5b/Cenpf
GO:0001932	regulation of protein phosphorylation	798	-0.326109	-1.4268	1.02286e-05	1.02286e-05	0.00021026	2103	tags=24%, list=15%, signal=22%	Apc/Ep300/Adipor2/Dusp1/Adam17/Deptor/Ret/Nck2/Plec/Ccny/Crebl2/Ppp1r9b/Cdkn1c/Tspan9/Dipk2a/Gpd1l/Tlr7/Fyn/Ralb/Grk2/Tlr4/Sema4d/Arhgef2/Rapgef2/Il6ra/Ptpro/Tnf/Inpp5f/Sfn/Tlr1/Cbl/Cd24a/Pkib/Spred2/Insr/Bmp2/Cd109/Nras/Dusp7/Ctnnd1/Enpp2/Socs3/Sash1/Nck1/Tgfb1/Ptprc/Gnaq/Slco3a1/Plcg2/Cd86/Ctdsp1/Pid1/Nr2f2/Adrb2/Bmp4/Synpo2/Rgcc/Pink1/Heg1/Hus1/Parp9/Fnip2/Inpp5k/Rgs2/Adar/Cd40/Fgfr3/Dab2ip/Ad…
GO:0044784	metaphase/anaphase transition of cell cycle	87	0.558854	1.9419	1.07278e-05	1.07278e-05	0.000219486	2992	tags=47%, list=22%, signal=37%	Knl1/Ube2c/Ttk/Spdl1/Spc25/Spc24/Birc5/Trip13/Bub1/Incenp/Tacc3/Cdca8/Aurkb/Plk1/Ndc80/Gen1/Bcl7c/Zwilch/Nuf2/Klhl22/Cenpe/Nek6/Smarcc1/Cdc16/Anapc15/Dpf1/Fbxo5/Zwint/Cdk5rap2/Cdc6/Phf10/Atm/Mad2l1/Haspin/Kntc1/Bcl7a/Nsmce2/Anapc11/Cdc20/Ccnb1/Bub1b
GO:0033993	response to lipid	562	-0.349981	-1.49122	1.08779e-05	1.08779e-05	0.000220647	2284	tags=28%, list=17%, signal=24%	Irak2/Calcoco1/Dab2/Fes/Abr/Casp4/Stat5b/Zc3h12a/Irak4/Cflar/Lancl2/Lilrb4a/Jak2/Bcr/Tgfbr3/Akr1c19/Fosl2/Ep300/Tbx2/Adam17/Eif2ak2/Ncoa2/Kdm4c/Ret/Msn/Nr3c1/Id3/Trim24/Acr/Rxra/Vps54/Pdcd4/Cxcl10/Casp9/Il1rn/Tlr4/Fam210b/Tnf/Fbxo3/Htr7/Casp7/Wbp2/Ly96/Sbno2/Srarp/Lgals9/Sash1/Nlrp3/Tgfb1/Zmiz1/Slc12a2/Pde4b/Plcg2/Cd86/Pid1/Lipa/Tnip3/Bmp4/Stap1/Ctnnb1/Il10/Plscr4/Trim12a/Tnfrsf1b/P2ry6/Dab2ip/Gi…
GO:0002263	cell activation involved in immune response	226	-0.433564	-1.70349	1.08858e-05	1.08858e-05	0.000220647	2360	tags=33%, list=17%, signal=28%	Gata3/Cd180/Xrcc4/Swap70/Fes/Stxbp2/Abr/Pld2/Zc3h12a/Rc3h1/Lilrb4a/Gpr183/Bcr/Lgals3/Tlr4/Rab27a/Coro1a/Il6ra/Tnf/Nckap1l/Sbno2/Lgals9/Cplx2/Nlrp3/Tgfb1/Ptprc/Plcg2/Il10/Lat2/Cd40/Kmt5b/Irf1/Gata2/Myo1f/Nmi/Jak3/Enpp3/Pf4/Nfkbid/Il27ra/Tcim/Itgb2/Dock2/Syk/Dysf/Cd74/Tnfsf13/Ifi35/Rac2/Ptafr/Spi1/Fcer1g/Ptpn6/Irf8/Tyrobp/Slfn2/Pglyrp1/Lyn/Ly9/Cd300a/Hlx/Lfng/Cd84/Lcp1/Mfng/Dll1/Ccr2/Slc11a1/Kit/Ic…
GO:0051251	positive regulation of lymphocyte activation	260	-0.415001	-1.64694	1.09445e-05	1.09445e-05	0.00022081	2545	tags=35%, list=18%, signal=29%	Rara/Arid1a/Sirpb1c/Cdkn1a/Smarcd1/Il2ra/Rhoh/Gata3/Lck/Stat5b/H2-Ob/Lilrb4a/Gpr183/Tyk2/Jak2/Runx3/Dock8/Cd59a/Sash3/Adam8/Nck2/Efnb1/H2-T22/Tlr4/Coro1a/Cd24a/H2-Eb1/Nckap1l/Slc39a10/Cd27/Lgals9/Nck1/Nlrp3/Tgfb1/Zmiz1/Ptprc/Cd86/Il10/Cd40/H2-DMa/Kmt5b/Bloc1s6/Irf1/Il4i1/Jak3/Efnb2/Cd83/Nfkbid/H2-K1/H2-Aa/Il15/Syk/Csf1r/Atp11c/B2m/H2-D1/Cd74/Tnfsf13/H2-Ab1/Ephb4/Itpkb/Aif1/Spi1/Il7r/Nod2/Tyrobp/I…
GO:0051310	metaphase chromosome alignment	90	0.552107	1.91702	1.11958e-05	1.11958e-05	0.00022484	2302	tags=37%, list=17%, signal=31%	Cdca5/Knl1/Kif14/Nek2/Spdl1/Spc25/Spc24/Birc5/Ska1/Ska3/Cenpq/Sgo1/Incenp/Spag5/Ect2/Cdca8/Dsn1/Aurkb/Kifc1/Ndc80/Nuf2/Cenpe/Kif22/Brca2/Fam83d/Racgap1/Zwint/Gem/Cdt1/Mis12/Pmf1/Kifc5b/Cenpf
GO:0019724	B cell mediated immunity	109	-0.522002	-1.86096	1.14203e-05	1.14203e-05	0.000228295	1567	tags=35%, list=11%, signal=31%	Tgfb1/Pou2f2/Ptprc/Cr1l/Cd40/H2-DMa/Kmt5b/Nectin2/Il21r/H2-K1/Il27ra/H2-D1/Cd74/Tnfsf13/H2-Ab1/Fcgr3/Fcer1g/Nod2/Ptpn6/Pirb/Inpp5d/C1qb/C1qa/Fcgr2b/Csf2rb2/Irf7/C1qc/H2-Q4/H2-Q7/Fcgr1/Gimap5/H2-Q6/H2-T23/Icosl/Trem2/Csf2rb/Fcgr4/Ighm
GO:0006270	DNA replication initiation	30	0.743113	2.16464	1.15568e-05	1.15568e-05	0.00022997	2261	tags=67%, list=16%, signal=56%	Ccne2/Mcm10/Ccne1/Orc1/Ticrr/Cdc45/Gins3/Mcm4/Mcm5/Orc2/Mcm7/Prim1/Mcm2/Prim2/Mcm3/Mcm6/Cdc6/Cdt1/Topbp1/Pola1
GO:0006888	endoplasmic reticulum to Golgi vesicle-mediated transport	113	0.512016	1.83934	1.20989e-05	1.20989e-05	0.000239663	2444	tags=38%, list=18%, signal=32%	Kdelr3/Sec16b/Tmed3/P4hb/Copb2/Kdelr2/Lman1/Golt1b/Yif1a/Tmed1/Sec24d/Sec22b/Hyou1/Sar1a/Tmed9/Yipf5/Rangrf/Mia3/Erp29/Gas1/Sec23a/Tmed2/Sec31a/Kdelr1/Copg1/Cope/Sec13/Yif1b/Ier3ip1/Lmf1/Copb1/Rint1/Tfg/Vapa/Uso1/Ykt6/Copa/Ergic3/Sec23b/Tex261/Stx18/Scfd1/Arcn1
GO:0048525	negative regulation of viral process	95	-0.534933	-1.86239	1.2288e-05	1.2288e-05	0.000242308	2074	tags=44%, list=15%, signal=38%	Eif2ak2/Trim11/Tasor/Ciita/Tnf/Mid2/Ifi206/Apobec3/Ifitm1/Inpp5k/N4bp1/Oasl1/Trim12a/Ifitm3/Ifi207/Rnasel/Ifih1/Mndal/Trim5/Bst2/Stat1/Trim56/Ly6e/Trim12c/Trim25/Oas2/Trim30d/Cd74/Ifi209/Znfx1/Trim21/Oas1a/Oasl2/Sp100/Ifi203/Isg15/Trim6/Trim30a/Ch25h/Ifi213/Rsad2/Ifi208
GO:0051336	regulation of hydrolase activity	638	-0.340641	-1.47195	1.28471e-05	1.28471e-05	0.00025219	1973	tags=25%, list=14%, signal=23%	Asap2/Tbc1d8/Mgat5/Adap1/Casp9/Ppp6r3/Gna12/Prex1/Sema4d/Srgap2/Sh3bp4/Tank/Rapgef2/Tnf/Chn2/Sfn/Tbc1d22b/Wnk1/Nckap1l/Bmp2/Psmb8/Cd109/Snx13/Psap/Sos2/Slc39a10/Serpinb12/Rffl/Ccl12/Nlrp3/Ccl3/Tbc1d4/Ptprc/Ifi206/Gmip/Itih5/Cd86/Nod1/Aph1c/Ric1/Oasl1/Rgs2/Fgd6/Rgp1/Gpr137b/Cd40/Fgfr3/Ifi207/Arhgap29/Psme1/Arhgap45/Dab2ip/Rgs16/Sele/Rasgrp4/Rps6ka3/Mgmt/Timp3/Ralgapa1/Rasgef1b/Mndal/Ripor1/Stat1/P…
GO:0051301	cell division	532	0.353791	1.51064	1.34172e-05	1.34172e-05	0.000261609	3003	tags=33%, list=22%, signal=27%	Thbs4/Sfrp2/Fgf7/Vegfd/Cdca5/Gpsm2/Knl1/Mdk/Ube2c/Tgfb3/Ccne2/Prc1/Kif14/Ccne1/Ptn/Aspm/Pdxp/Nek2/E2f8/Dock7/Top2a/Mis18bp1/Spdl1/Cks2/Numbl/Spc25/Spc24/Cks1b/Birc5/Ska1/Blm/Ncapg2/Fgfr1/Ska3/Bub1/Brip1/Fgf2/Kif11/Cdk1/Rcc1/Sgo1/Incenp/Cenpw/Spag5/Tacc3/Ccna2/Diaph3/Ect2/Cdca3/Cdca8/Hells/Pard3/Iqgap2/Kif20b/Cdc25c/Dsn1/Cenps/Myh10/Cdk14/Vegfa/Aurkb/Plk1/Ercc6l/Tead3/Tpx2/Mastl/Ndc80/Anln/Cdca2/C…
GO:0060346	bone trabecula formation	10	0.8988	1.9811	1.3447e-05	1.3447e-05	0.000261609	974	tags=80%, list=7%, signal=74%	Vdr/Sfrp1/Fbn2/Enpp1/Col1a1/Thbs3/Mmp2/Vegfa
GO:0034220	monoatomic ion transmembrane transport	493	-0.356271	-1.50705	1.42398e-05	1.42398e-05	0.000275802	1963	tags=23%, list=14%, signal=21%	Trpv4/Cxcl10/Gpd1l/Fyn/Fxyd5/Pllp/Pawr/Plcg1/Slc30a4/Coro1a/Abcc3/Mcoln1/Lrrc8b/Pik3c2a/Abcb7/Chrnb1/Wnk1/Atp6v0d2/Pacc1/Atox1/Slc39a10/Lrrc8d/P2ry12/Stac/Tgfb1/Atp6v0a1/Slc12a2/Ptprc/Pde4b/Plcg2/Lrrc8a/Adrb2/Bmp4/Cacng1/Atp1b3/Hecw2/Stom/Dmd/Clcn3/Cnksr3/Slc31a2/Ikbkb/Tmem37/Slc24a5/Steap4/Slc6a6/Klhl24/Ehd3/Plcb4/Ccr5/Slc12a6/Orai1/Slc12a9/P2rx7/Gstm7/Tmc6/Cacna1h/Kcnj2/Tcn2/Dysf/Ahr/Slc8b1/Mrl…
GO:0002279	mast cell activation involved in immune response	40	-0.676553	-2.03502	1.43734e-05	1.43734e-05	0.000277158	2267	tags=42%, list=16%, signal=36%	Fes/Stxbp2/Pld2/Lilrb4a/Cplx2/Lat2/Gata2/Enpp3/Syk/Rac2/Fcer1g/Ptpn6/Lyn/Cd300a/Cd84/Kit/Chga
GO:0043269	regulation of monoatomic ion transport	346	-0.385892	-1.57839	1.44407e-05	1.44407e-05	0.00027723	1943	tags=27%, list=14%, signal=24%	Cxcl10/Gpd1l/Fyn/Fxyd5/Pawr/Plcg1/Tspan18/Coro1a/Pik3c2a/Htr7/Wnk1/Gnai2/Il16/P2ry12/Stac/Tgfb1/Gnaq/Pde4b/Plcg2/Adrb2/Bmp4/Cacng1/Inpp5k/Ctnnb1/Cxcl12/Atp1b3/Mylk/Hecw2/Stom/Dmd/Cnksr3/Slc31a2/Jak3/Ikbkb/Adora2a/Gja1/Klhl24/Ehd3/Plcb4/Orai1/P2rx7/Stc1/Ace/Gstm7/Hfe/Kcnj2/B2m/Dysf/Ahr/Slc8b1/Mrln/Abcb1b/Agrn/Ptpn6/Atp2b4/Chd7/Lyn/Cd300a/Plcb1/Pik3cg/Cd84/Chp2/Cxcr4/Ctss/Slc30a1/Rapgef3/Cracr2b/Pd…
GO:0007091	metaphase/anaphase transition of mitotic cell cycle	86	0.567497	1.98056	1.46915e-05	1.46915e-05	0.000280807	2992	tags=48%, list=22%, signal=38%	Knl1/Ube2c/Ttk/Spdl1/Spc25/Spc24/Birc5/Trip13/Bub1/Incenp/Tacc3/Cdca8/Aurkb/Plk1/Ndc80/Gen1/Bcl7c/Zwilch/Nuf2/Klhl22/Cenpe/Nek6/Smarcc1/Cdc16/Anapc15/Dpf1/Fbxo5/Zwint/Cdk5rap2/Cdc6/Phf10/Atm/Mad2l1/Haspin/Kntc1/Bcl7a/Nsmce2/Anapc11/Cdc20/Ccnb1/Bub1b
GO:0060071	Wnt signaling pathway, planar cell polarity pathway	33	0.702268	2.08329	1.51852e-05	1.51852e-05	0.0002879	1106	tags=39%, list=8%, signal=36%	Sfrp1/Sfrp2/Cthrc1/Fzd2/Wnt5a/Wnt11/Ror2/Dact1/Fzd1/Ptk7/Fzd3/Nkd1/Ryk
GO:0001913	T cell mediated cytotoxicity	40	-0.675447	-2.03169	1.51947e-05	1.51947e-05	0.0002879	2158	tags=50%, list=16%, signal=42%	Stx7/H2-T22/Rab27a/Raet1e/Nckap1l/Tap2/Ptprc/Mill2/Nectin2/P2rx7/H2-K1/Hfe/B2m/H2-D1/Il7r/H2-Q4/H2-Q7/H2-T24/H2-Q6/H2-T23
GO:0006268	DNA unwinding involved in DNA replication	20	0.795223	2.09545	1.56648e-05	1.56648e-05	0.000295521	1801	tags=70%, list=13%, signal=61%	Rad51/Gins2/Cdc45/Blm/Gins3/Mcm4/Recql4/Mcm5/Mcm7/Mcm2/Mcm3/Mcm6/Gins4/Gins1
GO:1901991	negative regulation of mitotic cell cycle phase transition	158	0.467511	1.75222	1.75251e-05	1.75251e-05	0.000326823	2499	tags=34%, list=18%, signal=28%	Cdkn2b/Clspn/Brca1/Knl1/Ttk/Inhba/Orc1/Dtl/Spdl1/Ticrr/Rpa2/Spc25/Spc24/Birc5/Dact1/Blm/Creb3l1/Trip13/Bub1/Cdk1/Pkmyt1/Incenp/Cdca8/Ezh2/Aurkb/Plk1/Donson/Ndc80/Gen1/Bard1/Zwilch/Cdk5rap3/Nuf2/Klhl22/Cenpe/Anapc15/Brsk1/Ier3/Fbxo5/Zwint/Cdk5rap2/Cdc6/Rint1/Atm/Chek1/Topbp1/Mad2l1/Pkd2/Rbbp8/Rad50/Acvr1/Haspin/Kntc1
GO:0030071	regulation of mitotic metaphase/anaphase transition	81	0.568454	1.95895	1.7596e-05	1.7596e-05	0.000326823	2992	tags=49%, list=22%, signal=39%	Knl1/Ube2c/Ttk/Spdl1/Spc25/Spc24/Birc5/Trip13/Bub1/Incenp/Cdca8/Aurkb/Plk1/Ndc80/Gen1/Bcl7c/Zwilch/Nuf2/Klhl22/Cenpe/Nek6/Smarcc1/Cdc16/Anapc15/Dpf1/Fbxo5/Zwint/Cdk5rap2/Cdc6/Phf10/Atm/Mad2l1/Haspin/Kntc1/Bcl7a/Nsmce2/Anapc11/Cdc20/Ccnb1/Bub1b
GO:0051306	mitotic sister chromatid separation	56	0.627202	2.03897	1.75995e-05	1.75995e-05	0.000326823	2992	tags=59%, list=22%, signal=46%	Knl1/Ube2c/Ttk/Spdl1/Spc25/Spc24/Birc5/Trip13/Bub1/Incenp/Cdca8/Aurkb/Plk1/Ndc80/Gen1/Zwilch/Nuf2/Klhl22/Cenpe/Cdc16/Anapc15/Fbxo5/Zwint/Cdk5rap2/Atm/Mad2l1/Haspin/Kntc1/Nsmce2/Anapc11/Cdc20/Ccnb1/Bub1b
GO:0019752	carboxylic acid metabolic process	628	0.343149	1.4771	1.7624e-05	1.7624e-05	0.000326823	2362	tags=26%, list=17%, signal=23%	Bcat1/Aldh1a3/Aldh1a2/Slc1a3/Slc16a3/P4ha3/Twist1/Rbp1/Echdc2/Phgdh/Ptges/Ephx2/Ddah1/Ptgis/Azin2/Bdh2/Plod2/Gfpt2/Brca1/Ptgr1/Pla2g4a/Dpep1/Nupr1/Crabp2/Enpp1/Cyp1b1/P4ha2/Col6a1/Ass1/Avpr1a/Cacna1a/Sphk1/Pycr1/Ptgs2/Aldh1l2/Hk2/C1qtnf2/Anxa1/Acot11/Slc27a6/P4ha1/Pdpn/Gcat/Sdsl/Me1/Mif/Sardh/Igf1/Aldh18a1/Ugdh/Tpi1/Hacd1/Pdk3/Dhfr/P4hb/Galk1/Pgk1/Csgalnact1/C3/Abat/Pgam1/Hpgd/Dse/Fasn/Dsel/Gsto1…
GO:0045786	negative regulation of cell cycle	332	0.384565	1.57828	1.78547e-05	1.78547e-05	0.000329699	1679	tags=21%, list=12%, signal=19%	Rbm46/Lif/Cdkn2b/Clspn/Brca1/Nupr1/Stil/Knl1/Ptgs2/Ttk/Inhba/Rad51/Nek2/E2f8/Orc1/Dtl/Spdl1/Ticrr/Rpa2/Spc25/Spc24/Birc5/Dact1/Blm/Creb3l1/Trip13/Egfr/Bub1/Cdk1/Pkmyt1/Incenp/Gmnn/Hpgd/Diaph3/Fzd3/Cdca8/Ezh2/Chtf18/Aurkb/Plk1/E2f1/Trp53i13/Kifc1/Donson/Recql4/Ndc80/Gen1/Timp2/Cdkn2a/Atf5/Bard1/Zwilch/Cdk5rap3/Nuf2/Klhl22/Cenpe/Brca2/Mdc1/Anapc15/Gas1/Brsk1/Ier3/Fbxo5/Zwint/Npm1/Nubp1/Cdk5rap2/Pla…
GO:0034765	regulation of monoatomic ion transmembrane transport	247	-0.413264	-1.63639	1.79771e-05	1.79771e-05	0.000330559	1943	tags=26%, list=14%, signal=22%	Cxcl10/Gpd1l/Fyn/Fxyd5/Plcg1/Coro1a/Pik3c2a/Wnk1/Stac/Tgfb1/Pde4b/Plcg2/Adrb2/Bmp4/Cacng1/Atp1b3/Hecw2/Stom/Dmd/Cnksr3/Slc31a2/Ikbkb/Klhl24/Ehd3/P2rx7/Gstm7/Kcnj2/Dysf/Ahr/Mrln/Abcb1b/Agrn/Ptpn6/Atp2b4/Chd7/Lyn/Plcb1/Pik3cg/Chp2/Ctss/Slc30a1/Rapgef3/Kcnq1/Cav1/Gimap5/Shank3/Atp1b2/F2rl3/Hrc/Trem2/Tspan13/Lrrc55/Clec4b1/Aplnr/Edn3/Trpc3/Abcb1a/Atp1a2/Akap5/Tesc/Abcc9/Casq2/Kcnj8
GO:0070665	positive regulation of leukocyte proliferation	129	-0.499831	-1.82121	1.8478e-05	1.8478e-05	0.000338342	2381	tags=42%, list=17%, signal=35%	Il2ra/Ptk2/Nmb/Stat5b/Gpr183/Tyk2/Jak2/Cd59a/Sash3/Nck2/Efnb1/H2-T22/Tlr4/Coro1a/Cd24a/Nckap1l/Slc39a10/Nck1/Ptprc/Cd86/St6gal1/Cd40/Jak3/Bcl2l1/Mapk3/H2-K1/Il15/Syk/Csf1r/H2-D1/Cd74/Rac2/Aif1/Lyn/Flt3l/Bst1/Il1b/Mef2c/Csf2rb2/Kitl/H2-Q4/Igf2/H2-Q7/Ccr2/Irgm1/Kit/H2-Q6/H2-T23/Icosl/Csf2rb/Cd38/Cd274/Ighm/Ccr7
GO:0032693	negative regulation of interleukin-10 production	14	-0.846184	-1.99987	1.85897e-05	1.85897e-05	0.000338963	1141	tags=64%, list=8%, signal=59%	Jak3/Tyrobp/Trib2/Fcgr2b/Cd84/Vsir/Dll1/Tnfrsf21/Cd274
GO:0007162	negative regulation of cell adhesion	239	-0.429519	-1.6986	1.97304e-05	1.97304e-05	0.000358263	2381	tags=40%, list=17%, signal=33%	Il2ra/Ptk2/Myadm/Swap70/Mmp12/Zc3h12a/Rc3h1/Lilrb4a/Jak2/Runx3/Zfp608/Lgals3/Dusp1/Adam8/H2-T22/Trpv4/Il1rn/Pawr/Sema4d/Lpxn/Akna/Hspg2/Cd24a/Wnk1/Bmp2/Kank1/Tnfaip8l2/Enpp2/Lgals9/Tgfb1/Ptprc/Cd86/Bmp4/Rgcc/Cd37/Angpt2/Il10/Cxcl12/Cd9/Actn4/Hoxa7/Hspb1/Il20rb/Irf1/Myo1f/Lrrc32/Il4i1/Jak3/Adora2a/Pf4/Adam10/Fzd4/Dusp22/Acer2/Nfkbid/H2-K1/H2-Aa/Adam15/Dusp3/Hfe/Bmp6/Notch1/H2-D1/Cd74/Ppm1f/Alox12/…
GO:0002474	antigen processing and presentation of peptide antigen via MHC class I	31	-0.721359	-2.0632	1.98874e-05	1.98874e-05	0.000358805	2230	tags=68%, list=16%, signal=57%	Tapbp/H2-T22/Tapbpl/Raet1e/Tap2/Tap1/Mill2/H2-K1/Hfe/B2m/H2-D1/Fcgr3/Mpeg1/Fcer1g/Mfsd6/H2-Q4/H2-Q7/H2-T24/Fcgr1/H2-Q6/H2-T23
GO:0002832	negative regulation of response to biotic stimulus	107	-0.502329	-1.79982	1.99249e-05	1.99249e-05	0.000358805	1668	tags=34%, list=12%, signal=30%	Zdhhc18/Tap2/Lgals9/Tgfb1/Tap1/Ifi206/Trafd1/Adar/Ifi207/Mndal/Nmi/Il4i1/Stat2/H2-K1/Irgm2/H2-D1/Ifi209/Ahr/Trim21/Oas1a/Igtp/Clec2d/Ceacam1/Ifi203/Isg15/Pparg/H2-Q4/Igf2/Nlrc5/H2-Q7/Parp14/Irgm1/H2-Q6/H2-T23/Ifi213/Ifi208
GO:1904062	regulation of monoatomic cation transmembrane transport	230	-0.416212	-1.63769	2.03226e-05	2.03226e-05	0.00036446	1943	tags=26%, list=14%, signal=22%	Cxcl10/Gpd1l/Fyn/Fxyd5/Plcg1/Coro1a/Pik3c2a/Wnk1/Stac/Tgfb1/Pde4b/Plcg2/Adrb2/Bmp4/Cacng1/Atp1b3/Hecw2/Dmd/Cnksr3/Slc31a2/Ikbkb/Klhl24/Ehd3/P2rx7/Gstm7/Kcnj2/Dysf/Ahr/Mrln/Agrn/Ptpn6/Atp2b4/Chd7/Lyn/Plcb1/Pik3cg/Chp2/Ctss/Slc30a1/Rapgef3/Kcnq1/Cav1/Gimap5/Atp1b2/F2rl3/Hrc/Trem2/Tspan13/Lrrc55/Clec4b1/Aplnr/Edn3/Trpc3/Atp1a2/Akap5/Tesc/Abcc9/Casq2/Kcnj8
GO:0008015	blood circulation	362	-0.387942	-1.59475	2.13423e-05	2.13423e-05	0.000381179	2145	tags=29%, list=16%, signal=25%	Bcr/Tgfbr3/Lnpep/Slc23a2/Npy1r/Plec/Bbs4/Nr3c1/Trpv4/Gpd1l/Npr2/Gna12/Grk2/Nampt/Ptpro/Tnf/Htr7/Foxc1/Wnk1/Rps6ka2/Arhgef12/Tgfb1/Gnaq/Rnpep/Nav2/Pde4b/Nr2f2/Adrb2/P2ry2/Rgs2/Apln/Itga9/Mef2a/Ctnnbip1/Map2k6/Bloc1s6/Dmd/Tnni2/Adora2a/Gja1/Ehd3/Stc1/Ace/Dock4/Ptprm/Eng/Ncf2/Cacna1h/Kcnj2/Bmp6/Itga1/Ece1/Tjp1/Ahr/Ptafr/Gch1/Mgll/Agrn/Ptgs1/Atp2b4/Chd7/Vegfc/Ceacam1/Pparg/Prcp/Cldn5/Jup/Ramp2/Cxcr4/…
GO:1901976	regulation of cell cycle checkpoint	44	0.65221	2.03591	2.21656e-05	2.21656e-05	0.000394268	1612	tags=34%, list=12%, signal=30%	Brca1/Knl1/Rad51/Rpa2/Birc5/Incenp/Cdca8/Aurkb/Ndc80/Gen1/Bard1/Brca2/Anapc15/Zwint/Cdk5rap2
GO:0060142	regulation of syncytium formation by plasma membrane fusion	26	-0.73758	-2.05332	2.28712e-05	2.28712e-05	0.000405165	1414	tags=58%, list=10%, signal=52%	Cflar/Cxcl10/Cxcl12/Tmem182/Stat1/Gdf15/Plekho1/Ccl8/Scgb3a1/Tyrobp/Flt3l/Cd53/Rapgef3/Ehd2/Trem2
GO:0034767	positive regulation of monoatomic ion transmembrane transport	113	-0.496079	-1.7781	2.3993e-05	2.3993e-05	0.000423316	1592	tags=28%, list=12%, signal=25%	Stac/Plcg2/Adrb2/Bmp4/Atp1b3/Dmd/Cnksr3/Ikbkb/Ehd3/P2rx7/Gstm7/Kcnj2/Abcb1b/Plcb1/Chp2/Ctss/Rapgef3/Kcnq1/Cav1/Gimap5/Shank3/Atp1b2/F2rl3/Trem2/Lrrc55/Clec4b1/Aplnr/Edn3/Trpc3/Abcb1a/Akap5/Tesc
GO:0006302	double-strand break repair	274	0.406529	1.63171	2.57402e-05	2.57402e-05	0.000452312	2756	tags=30%, list=20%, signal=24%	Usp51/Twist1/Cdca5/Brca1/Mcm8/4930447C04Rik/Aunip/Rad51/Gins2/Tonsl/Esco2/Parpbp/Cdc45/Rpa2/Blm/Mms22l/Trip13/Brip1/Fancm/Plk1/Mcm4/Recql4/Gen1/Bcl7c/Swi5/Spire1/Xrcc5/Mcm5/Smarcc1/Lig1/Mcm7/Brca2/Sfr1/Helb/Mcm2/Ddx1/Dpf1/Mcm3/Rad54l/Rad51ap1/Zswim7/Parp3/Fancd2/Mcm6/Xrcc2/Rad54b/Gins4/Foxm1/Morf4l2/Polq/Cdc7/Rmi2/Phf10/Spidr/Atm/Zcwpw1/Nhej1/Nsd2/Eme1/Ooep/Rpa1/Chek1/Topbp1/Paxx/Aplf/Pola1/Nucks…
GO:0060343	trabecula formation	23	0.764507	2.12116	2.76723e-05	2.76723e-05	0.000484308	974	tags=43%, list=7%, signal=40%	Vdr/Rbp4/Sfrp1/Fhl2/Fbn2/Enpp1/Col1a1/Thbs3/Mmp2/Vegfa
GO:0044283	small molecule biosynthetic process	406	0.368107	1.53575	2.7788e-05	2.7788e-05	0.000484388	2565	tags=32%, list=19%, signal=26%	Rbp4/Bcat1/Aldh1a3/Aldh1a2/Slc1a3/Rbp1/Phgdh/Ptges/Ak1/Ptgis/Nnmt/Cyp51/Plod2/Brca1/Pla2g4a/Pth1r/C1qtnf3/Ass1/Avpr1a/Sphk1/Pycr1/Ptgs2/Vkorc1/Fdps/Anxa1/Sdsl/Mif/Tm7sf2/Dnph1/Aldh18a1/Ugdh/Tpi1/Hacd1/Dhfr/Pgk1/Serpina12/Abat/Pgam1/H6pd/Dse/Fasn/Gsto1/Spp1/Aldh1a1/Eno1/Dkk3/Cyp7b1/Slc39a14/Mvd/Scd1/Pgp/Tk1/Fads1/Adk/Dhcr24/Pcx/Gls2/Fads2/Hsd17b7/Nanp/Chst12/Slc25a10/Msmo1/Mthfd1l/C1qtnf12/Star/El…
GO:0062207	regulation of pattern recognition receptor signaling pathway	148	-0.479034	-1.78533	2.79006e-05	2.79006e-05	0.000484414	2947	tags=39%, list=21%, signal=31%	Slc15a2/Esr1/Ptpn22/Arrb2/Fbxl2/Tirap/Nfkbil1/Zc3hav1/Mavs/Pum2/Nr1d1/Ddx3x/Casp4/Znrf1/Mark4/Eif2ak2/Trim11/Dhx58/Sec14l1/Lrch4/Tlr4/Otud4/Atat1/Tlr1/Zdhhc18/Ifi206/Plcg2/Oasl1/Ifi207/Dab2ip/Irf1/Mndal/Slc15a3/Nop53/Cd14/Rnf125/Irgm2/Ifi209/Ifi35/Nod2/Pik3ap1/Igtp/Ifi203/Lyn/Cd300a/Irf7/Trim30a/Ddx60/Gbp2/Cd36/Irgm1/Cav1/Gbp5/Trem2/Ifi213/Rsad2/Ifi208
GO:0000165	MAPK cascade	609	-0.336693	-1.44847	2.81721e-05	2.81721e-05	0.000487187	2268	tags=28%, list=16%, signal=25%	Dab2/Fgd4/Bnip2/Mapk11/Becn1/Zc3h12a/Irak4/Cflar/Tmem106a/Atf7/Lilrb4a/Gpr183/Jak2/Taok1/Apc/Dusp1/Adam17/Eif2ak2/Rell1/Adam8/Ret/Dusp26/Trpv4/Tlr7/Npr2/Tlr4/Rapgef2/Il6ra/Tnf/Pde8a/Mapk12/Cd24a/Zdhhc17/Spred2/Insr/Bmp2/Psap/Id1/Gnai2/Cd27/Dusp7/Sash1/Ccl12/Ccl3/Tgfb1/Ptprc/Plcg2/Nod1/Sorbs3/Adrb2/Bmp4/Inpp5k/Mink1/Ctnnb1/Cd2ap/Cxcl12/Trim12a/Rgs2/Ppm1l/Ackr3/Mef2a/Smad1/Cd40/Fgfr3/P2ry6/Dab2ip/M…
GO:0022409	positive regulation of cell-cell adhesion	249	-0.412975	-1.63493	2.8518e-05	2.8518e-05	0.000491038	2182	tags=34%, list=16%, signal=29%	H2-Ob/Lilrb4a/Tyk2/Jak2/Runx3/Dock8/Cd59a/Sash3/Piezo1/Adam8/Nck2/Efnb1/H2-T22/Pawr/Coro1a/Il6ra/Tnf/Cd24a/H2-Eb1/Nckap1l/Cd27/Lgals9/Nck1/Nlrp3/Tgfb1/Zmiz1/Ptprc/Cd86/Myo10/H2-DMa/Sele/Irf1/Il4i1/Jak3/Magi1/Ccr5/Efnb2/Cd83/Nfkbid/H2-K1/Dennd6a/H2-Aa/Il15/Itgb2/Syk/Ets1/B2m/Tjp1/H2-D1/Cd74/H2-Ab1/Ephb4/Itpkb/Ptafr/Plpp3/Aif1/Il7r/L1cam/Ceacam1/Il1b/Sox13/Afdn/Hlx/Kitl/Podxl/Gcnt2/Vsir/H2-Q4/Igf2/…
GO:0045619	regulation of lymphocyte differentiation	177	-0.445014	-1.70586	2.86202e-05	2.86202e-05	0.000491038	2567	tags=36%, list=19%, signal=30%	Cyp26b1/Rara/Arid1a/Smarcd1/Il2ra/Rhoh/Gata3/Lck/Stat5b/Zc3h12a/Sos1/Rc3h1/Lilrb4a/Runx3/Zfp608/Sash3/Adam8/Cd24a/Nckap1l/Sos2/Cd27/Lgals9/Nlrp3/Tgfb1/Zmiz1/Ptprc/Bmp4/Nfam1/Il10/H2-DMa/Hspb1/Irf1/Fbxo7/Il4i1/Jak3/Pf4/Sh3rf1/Cd83/Nfkbid/H2-Aa/Il15/Syk/Atp11c/Cd74/Itpkb/Spi1/Il7r/Ptpn6/Sh2b3/Pglyrp1/Inpp5d/Flt3l/Sox13/Hlx/Vsir/Ctla2a/Il2rg/Ccr2/Prdm1/Gimap5/Pik3r6/Zbtb16/Nrarp/Ccr7
GO:0051091	positive regulation of DNA-binding transcription factor activity	184	-0.445432	-1.71981	2.9209e-05	2.9209e-05	0.000499175	3399	tags=42%, list=25%, signal=32%	Rela/Cat/Zbtb7a/Malt1/Mbtps2/Anxa3/Lamtor5/Crebbp/Traf6/Hdac4/Esr1/Eda2r/Trim8/Card11/Tirap/Edn1/Mavs/Lrrfip1/Sav1/Terf2ip/Rbck1/Crtc2/Irak2/Rnf31/Cflar/Tgfbr3/Ep300/Eif2ak2/Tlr4/Arhgef2/Tnf/Mid2/Bmp2/Zc4h2/Nlrp3/Slco3a1/Plcg2/Nod1/Hdac5/Nfam1/Rgcc/Pink1/Il10/Trim12a/Cd40/Trim5/Lrp5/Tlr2/Ikbkb/Trim12c/Fzd4/Trim25/Clu/Trim30d/Trim37/Traf1/Tnfrsf11a/Prkd2/Plpp3/Trim21/Nod2/Trim34a/Sp100/Arhgef5/Ppa…
GO:0060143	positive regulation of syncytium formation by plasma membrane fusion	20	-0.782347	-2.03848	3.04992e-05	3.04992e-05	0.000517358	1414	tags=50%, list=10%, signal=45%	Cxcl12/Gdf15/Ccl8/Scgb3a1/Tyrobp/Flt3l/Cd53/Rapgef3/Ehd2/Trem2
GO:0018126	protein hydroxylation	25	0.757812	2.13434	3.05103e-05	3.05103e-05	0.000517358	1852	tags=60%, list=13%, signal=52%	P4ha3/P3h1/Plod2/P3h3/P4ha2/P3h4/Fkbp10/P4ha1/P4hb/Egln3/Asph/Crtap/Prdx4/Plod3/Jmjd7
GO:0002708	positive regulation of lymphocyte mediated immunity	91	-0.546463	-1.9037	3.18765e-05	3.18765e-05	0.000538427	2233	tags=37%, list=16%, signal=32%	Stat5b/Stx7/Sash3/H2-T22/Tnf/Cd24a/Raet1e/Tap2/Nlrp3/Tgfb1/Ptprc/Cd40/Mill2/Kmt5b/Nectin2/P2rx7/H2-K1/Hfe/B2m/H2-D1/Tnfsf13/Fcgr3/Fcer1g/Nod2/Il1b/H2-Q4/H2-Q7/H2-T24/Fcgr1/Gimap5/H2-Q6/H2-T23/Trem2/Rsad2
GO:0001944	vasculature development	668	-0.330779	-1.43429	3.21462e-05	3.21462e-05	0.000540887	1496	tags=24%, list=11%, signal=23%	Nr2f2/Lipa/Hdac5/Adrb2/Bmp4/Rgcc/Pnpla6/Heg1/Angpt2/Ctnnb1/Il10/Cxcl12/Ago1/Ackr3/Erap1/Apln/Mylk/Smad1/Cd40/Kctd10/Ecscr/Dab2ip/Hspb1/Hey1/Gata2/Jcad/Lrp5/Stat1/Pxn/C5ar1/Tcf4/Foxo1/Prkx/Rapgef1/Elk3/Eya1/Thsd7a/Flt4/Adam10/Fzd4/Gja1/Hoxa5/Efnb2/Col18a1/Glul/Ace/Adam15/Ptprm/Eng/Nrp1/Nrp2/Itgb2/Syk/Pdgfd/Notch1/Ets1/Apold1/Dysf/Tjp1/Ahr/Prkd2/Pik3cb/Ephb4/Rnf213/Epn2/Calcrl/Tbx3/Plpp3/Epha2/Notc…
GO:0001909	leukocyte mediated cytotoxicity	91	-0.544798	-1.8979	3.46009e-05	3.46009e-05	0.00057995	2263	tags=46%, list=16%, signal=39%	Stxbp2/Stat5b/Stx7/H2-T22/Rab27a/Coro1a/Raet1e/Nckap1l/Tap2/Tusc2/Lgals9/Tgfb1/Tap1/Ptprc/Stap1/Mill2/Nectin2/P2rx7/H2-K1/Hfe/B2m/H2-D1/Fcgr3/Spi1/Il7r/Ptpn6/Tyrobp/Clec2d/Ceacam1/Fcgr2b/H2-Q4/Igf2/Cx3cr1/H2-Q7/H2-T24/Fcgr1/Gimap5/Ncf1/H2-Q6/Pik3r6/H2-T23/Fcgr4
GO:0001568	blood vessel development	637	-0.335422	-1.44876	3.49414e-05	3.49414e-05	0.000583414	1496	tags=25%, list=11%, signal=23%	Nr2f2/Lipa/Hdac5/Adrb2/Bmp4/Rgcc/Pnpla6/Heg1/Angpt2/Ctnnb1/Il10/Cxcl12/Ago1/Ackr3/Erap1/Apln/Mylk/Smad1/Cd40/Kctd10/Ecscr/Dab2ip/Hspb1/Hey1/Gata2/Jcad/Lrp5/Stat1/Pxn/C5ar1/Tcf4/Foxo1/Prkx/Rapgef1/Elk3/Eya1/Thsd7a/Flt4/Fzd4/Gja1/Hoxa5/Efnb2/Col18a1/Glul/Ace/Adam15/Ptprm/Eng/Nrp1/Nrp2/Itgb2/Syk/Pdgfd/Notch1/Ets1/Apold1/Dysf/Tjp1/Ahr/Prkd2/Pik3cb/Ephb4/Rnf213/Epn2/Calcrl/Tbx3/Plpp3/Epha2/Notch3/Spi1…
GO:0000725	recombinational repair	159	0.451425	1.69633	3.55717e-05	3.55717e-05	0.000590794	2430	tags=30%, list=18%, signal=25%	Usp51/Brca1/Mcm8/Aunip/Rad51/Gins2/Tonsl/Parpbp/Cdc45/Rpa2/Blm/Mms22l/Fancm/Mcm4/Recql4/Gen1/Swi5/Xrcc5/Mcm5/Mcm7/Brca2/Sfr1/Helb/Mcm2/Mcm3/Rad54l/Rad51ap1/Zgrf1/Zswim7/Mcm6/Xrcc2/Rad54b/Gins4/Morf4l2/Polq/Cdc7/Rmi2/Spidr/Atm/Ooep/Rpa1/Chek1/Topbp1/Nucks1/Rbbp8/Xrcc1/Smc6
GO:0060284	regulation of cell development	749	-0.317936	-1.38317	3.56546e-05	3.56546e-05	0.000590794	1743	tags=21%, list=13%, signal=19%	Cd24a/Csf3r/Nckap1l/Bmp2/Id1/Sos2/Cdk6/Cd27/Enpp2/Lgals9/Klf13/Klf10/Nlrp3/Ccl3/Ctnna1/Tgfb1/Zmiz1/Ptprc/Ctdsp1/Hdac5/Bmp4/Nfam1/Ctnnb1/Sorl1/Il10/Cxcl12/Tnfrsf1b/Gpr137b/Fgfr3/Ctnnbip1/H2-DMa/Hoxa7/Hspb1/Sema4c/Hey1/Dcx/Csf3/Irf1/Gata2/Tlr2/Jade2/Stat1/Fbxo7/Il4i1/Jak3/Zfpm1/Ikbkb/Dip2b/Rassf2/Pf4/Daam2/Sema7a/Sh3rf1/Fzd4/Gja1/Hoxa5/Ccr5/Cd83/Nfkbid/Ace/H2-Aa/Il15/Hoxb3/Tcim/Nrp1/Ccl9/Rflnb/Syk/…
GO:0035825	homologous recombination	41	0.662541	2.04524	3.60046e-05	3.60046e-05	0.000594334	2723	tags=51%, list=20%, signal=41%	Brca1/4930447C04Rik/Rad51/Top2a/Trip13/Brip1/Psmc3ip/Fancm/Chtf18/Cenps/Bard1/Rad54l/Rad51ap1/Fancd2/Rad54b/Eme1/Topbp1/Rbbp8/Rad50/Cenpx/Mlh1
GO:0045446	endothelial cell differentiation	104	-0.514266	-1.83169	3.88384e-05	3.88384e-05	0.000638693	1496	tags=39%, list=11%, signal=35%	Nr2f2/Lipa/Bmp4/Heg1/Ctnnb1/Atoh8/Hey1/Dmd/Ikbkb/Rapgef1/Fzd4/Col18a1/Stc1/Bmp6/Notch1/Apold1/Tjp1/Hoxb5/Abcb1b/Sox17/Ceacam1/Acvr2b/Il1b/Afdn/Plcb1/Cldn5/Cxcr4/Robo4/Pecam1/Rapgef3/Notch4/Dll1/Pde2a/Tie1/Ppp1r16b/Cdh5/Kdr/F11r/Ednrb/Sox18/Xdh
GO:0048511	rhythmic process	221	0.413917	1.61315	3.90236e-05	3.90236e-05	0.000639327	1174	tags=17%, list=9%, signal=16%	Prokr2/Ptger3/Drd4/Ptx3/Twist1/Bmpr1b/Kcnma1/Tnfaip6/Pla2g4a/Tyro3/Bhlhe41/Mdk/Runx1/Col6a1/Ass1/Gpr176/Inhba/Ptn/Prkg2/Top2a/Dtl/Enox1/Egfr/Igf1/Npas2/Cdk1/Ptprn/Ezh2/Maged1/Cyp7b1/Pdgfra/Suv39h2/Gas2/Gfpt1/Axl/Prokr1/Atf5
GO:0010562	positive regulation of phosphorus metabolic process	624	-0.336461	-1.44728	4.0053e-05	4.0053e-05	0.000651294	2034	tags=24%, list=15%, signal=21%	Ret/Nck2/Ccny/Crebl2/Tigar/Tspan9/Dipk2a/Fyn/Ralb/Gna12/Tlr4/Sema4d/Arhgef2/Rapgef2/Il6ra/Tnf/Tlr1/Cd24a/Insr/Nckap1l/Bmp2/Slc39a10/Ctnnd1/Enpp2/Sash1/Nck1/Tgfb1/Sdcbp/Ptprc/Slco3a1/Plcg2/Cd86/Pid1/Adrb2/Bmp4/Rgcc/Pink1/Parp9/Fnip2/Apln/Cd40/Fgfr3/P2ry6/Dab2ip/Map2k6/Csf3/Cln3/Gprc5b/Pxn/Mertk/Grk3/Bcl2l1/Rassf2/Flt4/Sema7a/Fgd2/Fzd4/Plek/P2rx7/Ppp2r5a/Il15/Irgm2/Eng/Tcim/Nrp1/Syk/Pdgfd/Csf1r/Bmp…
GO:0045937	positive regulation of phosphate metabolic process	624	-0.336461	-1.44728	4.0053e-05	4.0053e-05	0.000651294	2034	tags=24%, list=15%, signal=21%	Ret/Nck2/Ccny/Crebl2/Tigar/Tspan9/Dipk2a/Fyn/Ralb/Gna12/Tlr4/Sema4d/Arhgef2/Rapgef2/Il6ra/Tnf/Tlr1/Cd24a/Insr/Nckap1l/Bmp2/Slc39a10/Ctnnd1/Enpp2/Sash1/Nck1/Tgfb1/Sdcbp/Ptprc/Slco3a1/Plcg2/Cd86/Pid1/Adrb2/Bmp4/Rgcc/Pink1/Parp9/Fnip2/Apln/Cd40/Fgfr3/P2ry6/Dab2ip/Map2k6/Csf3/Cln3/Gprc5b/Pxn/Mertk/Grk3/Bcl2l1/Rassf2/Flt4/Sema7a/Fgd2/Fzd4/Plek/P2rx7/Ppp2r5a/Il15/Irgm2/Eng/Tcim/Nrp1/Syk/Pdgfd/Csf1r/Bmp…
GO:0002524	hypersensitivity	19	-0.786285	-2.03441	4.04236e-05	4.04236e-05	0.000654877	1275	tags=68%, list=9%, signal=62%	Il20rb/H2-K1/H2-D1/Fcgr3/Fcer1g/Fcgr2b/H2-Q4/H2-Q7/Fcgr1/H2-Q6/H2-T23/Fcgr4/Ccr7
GO:0045787	positive regulation of cell cycle	290	0.395543	1.59495	4.09136e-05	4.09136e-05	0.000660361	2126	tags=29%, list=15%, signal=25%	Rbm46/Cdca5/Gpsm2/Brca1/Nupr1/Rrm2/Stil/Knl1/Ube2c/Wnt5a/Meis2/Prkca/Ccne2/Smoc2/Plk4/Sphk1/Kif14/Ccne1/Ccn2/E2f8/Anxa1/Orc1/Dtl/Birc5/Ncapg2/Fgfr1/Egfr/Igf1/Bub1/Ncapg/Cdk1/Incenp/Spag5/Rrm1/Ect2/Atad5/Cdca8/Ezh2/Rad18/Kif20b/Cdc25c/Aurkb/Fen1/Ndc80/Gen1/Tgfb2/Bard1/Smc2/Cenpe/Brca2/Fosl1/Fam83d/Cdc16/Calr/Zpr1/Racgap1/Fbxo5/Rad51ap1/Tert/Npm1/Sass6/Ranbp1/Ddr2/Cdc6/Apex1/Ncaph/Poldip2/Eif4e/Smc…
GO:0032392	DNA geometric change	48	0.637256	2.03003	4.12279e-05	4.12279e-05	0.000662977	1801	tags=38%, list=13%, signal=33%	Mcm8/Rad51/Gins2/Anxa1/Top2a/Cdc45/Blm/Gins3/Mcm4/Recql4/Mcm5/Mcm7/Mcm2/Ddx1/Mcm3/Mcm6/Gins4/Gins1
GO:0001525	angiogenesis	464	-0.355841	-1.4961	4.1567e-05	4.1567e-05	0.000665972	1778	tags=30%, list=13%, signal=27%	Foxc1/Lrg1/Hspg2/Sp1/Wnk1/Wasf2/Meox2/Id1/Nras/Sash1/Ccl12/Tgfb1/Slc12a2/Hdac5/Adrb2/Bmp4/Rgcc/Pnpla6/Angpt2/Ctnnb1/Il10/Cxcl12/Ago1/Ackr3/Erap1/Apln/Smad1/Cd40/Kctd10/Ecscr/Dab2ip/Hspb1/Gata2/Jcad/Stat1/Pxn/C5ar1/Tcf4/Prkx/Elk3/Thsd7a/Flt4/Fzd4/Hoxa5/Efnb2/Col18a1/Glul/Ace/Adam15/Ptprm/Eng/Nrp1/Nrp2/Itgb2/Syk/Notch1/Ets1/Apold1/Dysf/Tjp1/Ahr/Prkd2/Pik3cb/Ephb4/Rnf213/Epn2/Calcrl/Epha2/Notch3/Atp…
GO:0090596	sensory organ morphogenesis	210	0.432934	1.67949	4.22611e-05	4.22611e-05	0.000673095	1044	tags=24%, list=8%, signal=22%	Dio3/Rbp4/Col8a2/Col8a1/Mfap5/Cthrc1/Prrx2/Aldh1a3/Col11a1/Twist1/Osr1/Ephb2/Lrig3/Fzd2/Col5a1/Tulp1/Eya4/Enpp1/Thy1/Mfap2/Col5a2/Wnt5a/Fat1/Tenm3/Ror2/Ptn/Fjx1/Prrx1/Megf11/Fgfr1/Sobp/Fgf2/Ahi1/Tbx18/Fzd5/Tsku/Osr2/Ttc39c/Ptk7/Six2/Gli3/Fzd3/Aldh1a1/Gbx2/Vegfa/Lrig1/Sox9/Six1/Nectin1/Vax2
GO:0050864	regulation of B cell activation	113	-0.488305	-1.75024	4.27742e-05	4.27742e-05	0.000673095	2233	tags=38%, list=16%, signal=32%	Stat5b/Rc3h1/Lilrb4a/Gpr183/Sash3/Pawr/Tlr4/Cd24a/Nckap1l/Slc39a10/Cd27/Tgfb1/Ptprc/Nfam1/Il10/Tnfrsf13b/Cd40/Kmt5b/Il4i1/Pkn1/Il27ra/Syk/Atp11c/Cd74/Ahr/Tnfsf13/Spi1/Nod2/Ptpn6/Tyrobp/Lyn/Inpp5d/Bst1/Laptm5/Cd300a/Fcgr2b/Mef2c/Il2rg/Tnfrsf21/Themis2/Samsn1/Cd38/Ighm
GO:1903038	negative regulation of leukocyte cell-cell adhesion	112	-0.508286	-1.81359	4.28135e-05	4.28135e-05	0.000673095	2219	tags=43%, list=16%, signal=36%	Zc3h12a/Rc3h1/Lilrb4a/Runx3/Zfp608/Lgals3/Adam8/H2-T22/Pawr/Cd24a/Wnk1/Tnfaip8l2/Lgals9/Tgfb1/Cd86/Bmp4/Cd37/Cxcl12/Hspb1/Il20rb/Irf1/Lrrc32/Il4i1/Jak3/Adora2a/Pf4/Dusp22/Nfkbid/H2-K1/H2-Aa/Dusp3/Hfe/H2-D1/Cd74/Ptpn6/Ceacam1/Laptm5/Cd300a/Hlx/Vsir/H2-Q4/H2-Q7/Tnfrsf21/Gimap5/H2-Q6/H2-T23/Cd274/Nrarp
GO:0001794	type IIa hypersensitivity	14	-0.834723	-1.97279	4.28983e-05	4.28983e-05	0.000673095	978	tags=79%, list=7%, signal=73%	H2-K1/H2-D1/Fcgr3/Fcer1g/Fcgr2b/H2-Q4/H2-Q7/Fcgr1/H2-Q6/H2-T23/Fcgr4
GO:0002445	type II hypersensitivity	14	-0.834723	-1.97279	4.28983e-05	4.28983e-05	0.000673095	978	tags=79%, list=7%, signal=73%	H2-K1/H2-D1/Fcgr3/Fcer1g/Fcgr2b/H2-Q4/H2-Q7/Fcgr1/H2-Q6/H2-T23/Fcgr4
GO:0090066	regulation of anatomical structure size	445	-0.35432	-1.47932	4.29382e-05	4.29382e-05	0.000673095	2214	tags=26%, list=16%, signal=23%	Arpc3/Hrh1/Cyfip1/Macf1/Tgfbr3/Ep300/Akt3/Tmod3/Npy1r/Deptor/Ret/Nck2/Bbs4/Evl/Grk2/Prex1/Sema4d/Dnajc16/Coro1a/Tnf/Tmsb4x/Htr7/Foxc1/Wnk1/Nckap1l/Kank1/Anxa7/Rilp/Sptan1/Vasp/Nck1/Slc12a2/Rin3/Lrrc8a/Tmod1/Adrb2/P2ry2/Cxcl12/Rgs2/Apln/Itga9/Sema4c/Ssh2/Dcx/Bloc1s6/Clcn3/Csf3/Cln3/Tlr2/Sptbn1/Dip2b/Adora2a/Daam2/Sema7a/Gja1/Ccr5/Slc12a6/Plek/Slc12a9/P2rx7/Cdc42ep1/Ace/Cdc42ep3/Dock4/Ptprm/Nrp1/Hi…
GO:0090130	tissue migration	280	-0.393681	-1.57035	4.48522e-05	4.48522e-05	0.000700578	2373	tags=39%, list=17%, signal=33%	Gadd45a/Ptk2/Gata3/Rab11a/Rras/Iqsec1/Krit1/Zc3h12a/Adipor1/Macf1/Tgfbr3/Hdac7/Apc/Akt3/Adam17/Adam8/Evl/Plcg1/Coro1a/Coro1b/Patz1/Tnf/Lpxn/Pik3c2a/Lrg1/Sp1/Meox2/Kank1/Enpp2/Sash1/Tgfb1/Plcg2/Nr2f2/Hdac5/Bmp4/Rgcc/Angpt2/Rreb1/Cxcl12/Actn4/Cd40/Atoh8/Dab2ip/Hspb1/Cln3/Gata2/Jcad/Plekhg5/Pxn/Flt4/Daam2/Pkn1/Efnb2/Col18a1/Glul/Stc1/Ptprm/Nrp1/Itgb2/Notch1/Ets1/Ppm1f/Prkd2/Pik3cb/Ephb4/Alox12/Plpp3…
GO:0018208	peptidyl-proline modification	37	0.668232	2.02989	4.61225e-05	4.61225e-05	0.000717847	2873	tags=54%, list=21%, signal=43%	Fkbp11/P4ha3/P4ha2/Fkbp10/P4ha1/P4hb/Ppib/Fkbp5/Egln3/Crtap/Ntmt1/Prdx4/Fkbp2/Ppil1/Ppih/Fkbp1b/P4htm/Ppif/Egln1/Ppic
GO:0050870	positive regulation of T cell activation	191	-0.427283	-1.65926	4.65884e-05	4.65884e-05	0.000722517	2545	tags=38%, list=18%, signal=31%	Rara/Arid1a/Sirpb1c/Smarcd1/Il2ra/Rhoh/Gata3/Lck/Stat5b/H2-Ob/Lilrb4a/Tyk2/Jak2/Runx3/Dock8/Cd59a/Sash3/Adam8/Nck2/Efnb1/H2-T22/Coro1a/Cd24a/H2-Eb1/Nckap1l/Cd27/Lgals9/Nck1/Nlrp3/Tgfb1/Zmiz1/Ptprc/Cd86/H2-DMa/Irf1/Il4i1/Jak3/Efnb2/Cd83/Nfkbid/H2-K1/H2-Aa/Il15/Syk/B2m/H2-D1/Cd74/H2-Ab1/Ephb4/Itpkb/Aif1/Il7r/Il1b/Sox13/Hlx/Kitl/Vsir/H2-Q4/Igf2/H2-Q7/Il2rg/Ccr2/Irgm1/Cav1/Gimap5/H2-Q6/Pik3r6/H2-T23/…
GO:0002262	myeloid cell homeostasis	184	-0.437863	-1.69058	4.72253e-05	4.72253e-05	0.000729798	2854	tags=38%, list=21%, signal=31%	Nemp1/Itgam/Hba-a2/Cebpg/Jam3/Chmp5/Bak1/Zfp36/Alas1/Smad5/Ireb2/Gata3/Nfe2l1/Hba-a1/Stat5b/Cflar/Lilrb4a/Jak2/Tgfbr3/Dnase2a/Tmod3/Adam17/Ptbp3/Tspan9/Kmt2e/Fam210b/Sp1/Cd24a/Nckap1l/Cdk6/Klf13/Pde4b/Lipa/Bmp4/Adar/Gata2/Stat1/Mertk/Zfpm1/Hmga1/Hoxa5/Ampd3/Csf1r/Rb1/Ets1/B2m/Pik3cb/Lmo2/Rac2/Itpkb/Spi1/Fcer1g/Sh2b3/Lyn/Inpp5d/Isg15/Ikzf1/Plcb1/Fcgr2b/Kitl/Adgrf5/Exoc6/Hoxb6/Mecom/Kcnq1/Ccr2/Kit/…
GO:0002696	positive regulation of leukocyte activation	285	-0.392329	-1.57058	4.77317e-05	4.77317e-05	0.000735016	2545	tags=35%, list=18%, signal=29%	Rara/Arid1a/Sirpb1c/Cdkn1a/Smarcd1/Il2ra/Rhoh/Gata3/Crlf2/Lck/Stat5b/H2-Ob/Lilrb4a/Gpr183/Tyk2/Jak2/Runx3/Dock8/Cd59a/Sash3/Adam8/Nck2/Efnb1/H2-T22/Tlr4/Coro1a/Tnf/Cd24a/H2-Eb1/Nckap1l/Slc39a10/Cd27/Lgals9/Il16/Nck1/Nlrp3/Tgfb1/Zmiz1/Ptprc/Cd86/Stap1/Il10/Plpp6/Cd40/H2-DMa/Kmt5b/Bloc1s6/Irf1/Il4i1/Jak3/Nectin2/Efnb2/Cd83/Nfkbid/H2-K1/H2-Aa/Tafa3/Il15/Syk/Csf1r/Atp11c/B2m/H2-D1/Cd74/Tnfsf13/H2-Ab1…
GO:0045839	negative regulation of mitotic nuclear division	53	0.608828	1.98353	4.80263e-05	4.80263e-05	0.000736949	2499	tags=51%, list=18%, signal=42%	Knl1/Ttk/Spdl1/Spc25/Spc24/Birc5/Trip13/Bub1/Incenp/Cdca8/Aurkb/Plk1/Ndc80/Gen1/Zwilch/Nuf2/Klhl22/Cenpe/Anapc15/Fbxo5/Zwint/Cdk5rap2/Atm/Chek1/Mad2l1/Haspin/Kntc1
GO:0002475	antigen processing and presentation via MHC class Ib	20	-0.773366	-2.01507	4.90636e-05	4.90636e-05	0.000750225	2020	tags=65%, list=15%, signal=56%	H2-T22/Raet1e/Tap2/Mill2/H2-K1/Hfe/B2m/H2-D1/H2-Q4/H2-Q7/H2-T24/H2-Q6/H2-T23
GO:0003018	vascular process in circulatory system	181	-0.44251	-1.70447	4.98964e-05	4.98964e-05	0.000760291	1476	tags=28%, list=11%, signal=25%	Adrb2/P2ry2/Rgs2/Apln/Itga9/Ctnnbip1/Bloc1s6/Abcg2/Adora2a/Gja1/Ace/Dock4/Ptprm/Bmp6/Itga1/Ece1/Tjp1/Ahr/Gch1/Mgll/Abcb1b/Ptgs1/Ceacam1/Cldn5/Ramp2/Itga4/Apoe/Pdgfb/Cysltr1/Pde2a/Ptp4a3/Plvap/Cd36/Agtr2/Cav1/Npr1/Nos3/Cdh5/Kdr/Gpr4/Ednrb/Kcna5/Gja5/Cd38/Edn3/Abcb1a/Gucy1a1/Tbxas1/Atp1a2/Chga/Kcnj8
GO:0002347	response to tumor cell	34	-0.677862	-1.96973	5.18573e-05	5.18573e-05	0.000787416	1743	tags=53%, list=13%, signal=46%	Cd24a/Tgfb1/Il4i1/Nectin2/H2-K1/Adam15/Notch1/H2-D1/Ahr/Spi1/Ceacam1/Txnip/Laptm5/H2-Q4/H2-Q7/Abi3/H2-Q6/Cd274
GO:0062208	positive regulation of pattern recognition receptor signaling pathway	57	-0.590195	-1.91132	5.27571e-05	5.27571e-05	0.000798299	2909	tags=46%, list=21%, signal=36%	Ptpn22/Tirap/Zc3hav1/Mavs/Pum2/Ddx3x/Casp4/Znrf1/Mark4/Dhx58/Lrch4/Tlr4/Atat1/Tlr1/Plcg2/Oasl1/Slc15a3/Cd14/Ifi35/Pik3ap1/Ddx60/Gbp2/Cd36/Cav1/Gbp5/Rsad2
GO:0051056	regulation of small GTPase mediated signal transduction	203	-0.417555	-1.62462	5.46429e-05	5.46429e-05	0.000823972	1979	tags=33%, list=14%, signal=28%	Iqsec1/Bnip2/Dynlt1a/Sos1/Bcr/Ophn1/Arhgap19/Sema4d/Arhgef2/Cbl/P2ry10b/Prag1/Kank1/Sos2/Iqsec3/Cdc42se2/Heg1/Cd2ap/Arhgdib/Tnfaip1/Kctd10/Dgkz/Dab2ip/Rasgrp4/Git1/Ralgapa1/Ripor1/Git2/Sipa1/Rapgef1/Chn1/Lpar4/Rasa4/Gpr65/Nrp1/Dennd3/Dock2/Notch1/Ralgapa2/Rgl2/Pik3cb/Sipa1l2/Itpkb/Agrn/Arrb1/Cyth1/Spry4/Itga3/Eps8l2/Pik3cg/Kitl/Lpar6/Rasip1/Tek/Stard8/Cyth4/Apoe/Abca1/Arhgef3/Arhgap18/Mcf2l/Adgrg…
GO:1903039	positive regulation of leukocyte cell-cell adhesion	212	-0.416983	-1.62342	5.61855e-05	5.61855e-05	0.000844312	2545	tags=37%, list=18%, signal=31%	Rara/Arid1a/Sirpb1c/Smarcd1/Il2ra/Rhoh/Gata3/Lck/Stat5b/H2-Ob/Lilrb4a/Tyk2/Jak2/Runx3/Dock8/Cd59a/Sash3/Adam8/Nck2/Efnb1/H2-T22/Pawr/Coro1a/Tnf/Cd24a/H2-Eb1/Nckap1l/Cd27/Lgals9/Nck1/Nlrp3/Tgfb1/Zmiz1/Ptprc/Cd86/H2-DMa/Sele/Irf1/Il4i1/Jak3/Efnb2/Cd83/Nfkbid/H2-K1/H2-Aa/Il15/Itgb2/Syk/Ets1/B2m/H2-D1/Cd74/H2-Ab1/Ephb4/Itpkb/Ptafr/Aif1/Il7r/Il1b/Sox13/Hlx/Kitl/Vsir/H2-Q4/Igf2/Itga4/H2-Q7/Il2rg/Ccr2/I…
GO:0045071	negative regulation of viral genome replication	55	-0.602056	-1.94081	5.6614e-05	5.6614e-05	0.000845291	2074	tags=47%, list=15%, signal=40%	Eif2ak2/Tasor/Tnf/Ifi206/Apobec3/Ifitm1/Inpp5k/N4bp1/Oasl1/Ifitm3/Ifi207/Rnasel/Ifih1/Mndal/Bst2/Oas2/Ifi209/Znfx1/Oas1a/Oasl2/Ifi203/Isg15/Trim6/Ifi213/Rsad2/Ifi208
GO:0008016	regulation of heart contraction	128	-0.481464	-1.7546	5.66386e-05	5.66386e-05	0.000845291	1525	tags=26%, list=11%, signal=23%	Pde4b/Adrb2/Rgs2/Apln/Mef2a/Dmd/Gja1/Ehd3/Stc1/Ace/Cacna1h/Kcnj2/Gch1/Agrn/Atp2b4/Jup/Kcnq1/Agtr2/Cav1/Epas1/Nos3/Hrc/Slc1a1/Ednrb/Kcna5/Gja5/Edn3/Hopx/Atp1a2/Chga/Abcc9/Casq2/Kcnj8
GO:2001251	negative regulation of chromosome organization	91	0.538344	1.87972	5.8021e-05	5.8021e-05	0.000861212	2514	tags=36%, list=18%, signal=30%	Knl1/Ttk/Top2a/Spdl1/Spc25/Spc24/Birc5/Trip13/Bub1/Incenp/Cdca8/Aurkb/Plk1/Recql4/Ndc80/Gen1/Zwilch/Nuf2/Klhl22/Cenpe/Mcm2/Anapc15/Fbxo5/Zwint/Src/Cdk5rap2/Atm/Mad2l1/Xrcc1/Rad50/Haspin/Kntc1/Tinf2
GO:0043303	mast cell degranulation	36	-0.673293	-1.97192	5.81006e-05	5.81006e-05	0.000861212	2267	tags=39%, list=16%, signal=33%	Fes/Stxbp2/Pld2/Cplx2/Lat2/Gata2/Syk/Rac2/Fcer1g/Lyn/Cd300a/Cd84/Kit/Chga
GO:0002883	regulation of hypersensitivity	16	-0.810842	-1.99189	5.90525e-05	5.90525e-05	0.000872354	1275	tags=75%, list=9%, signal=68%	Il20rb/H2-K1/H2-D1/Fcgr3/Fcer1g/Fcgr2b/H2-Q4/H2-Q7/Fcgr1/H2-Q6/H2-T23/Ccr7
GO:0030282	bone mineralization	107	0.499517	1.77946	5.97311e-05	5.97311e-05	0.000879398	1297	tags=30%, list=9%, signal=27%	Vdr/Lox/Comp/Twist1/Osr1/Fbn2/Bmpr1b/Tmem119/Pth1r/Enpp1/Col6a1/Wnt11/Pkdcc/Col1a2/Ptgs2/Tent5a/Aspn/Ptn/Mgp/Ltbp3/Bmpr1a/Slc8a1/Igf1/Osr2/Nfix/Spp1/Dnm3os/Sgms2/Sox9/Gpm6b/Mia3/Runx2
GO:0030001	metal ion transport	538	-0.338033	-1.43814	6.1239e-05	6.1239e-05	0.000898563	1963	tags=24%, list=14%, signal=21%	Trpv4/Cxcl10/Gpd1l/Fyn/Fxyd5/Pawr/Plcg1/Tspan18/Slc30a4/Coro1a/Mcoln1/Pik3c2a/Abcb7/Wnk1/Atox1/Slc39a10/Gnai2/Il16/P2ry12/Stac/Tgfb1/Slc12a2/Ptprc/Gnaq/Pde4b/Plcg2/Adrb2/Bmp4/Cacng1/Inpp5k/Ctnnb1/Cxcl12/Atp1b3/Mylk/Hecw2/Slc10a6/Dmd/Cnksr3/Klhl3/Myo1b/Slc31a2/Jak3/Ikbkb/Tmem37/Slc24a5/Nipal3/Adora2a/Steap4/Gja1/Slc6a6/Klhl24/Ehd3/Plcb4/Ccr5/Slc12a6/Orai1/P2rx7/Stc1/Ace/Gstm7/Cdh23/Cacna1h/Hfe/Kcn…
GO:0002886	regulation of myeloid leukocyte mediated immunity	59	-0.5856	-1.92571	6.17685e-05	6.17685e-05	0.000903291	2267	tags=47%, list=16%, signal=40%	Fes/Stxbp2/Abr/Pld2/Bcr/H2-T22/Stap1/Gata2/H2-K1/Itgb2/Syk/H2-D1/Rac2/Ptafr/Fcgr3/Spi1/Fcer1g/Tyrobp/Lyn/Cd300a/Cd84/H2-Q4/Cx3cr1/H2-Q7/Ccr2/Fcgr1/H2-Q6/H2-T23
GO:0002448	mast cell mediated immunity	38	-0.651097	-1.947	6.44446e-05	6.44446e-05	0.000939274	2267	tags=37%, list=16%, signal=31%	Fes/Stxbp2/Pld2/Cplx2/Lat2/Gata2/Syk/Rac2/Fcer1g/Lyn/Cd300a/Cd84/Kit/Chga
GO:0002705	positive regulation of leukocyte mediated immunity	111	-0.499657	-1.78984	6.47841e-05	6.47841e-05	0.000941074	2233	tags=37%, list=16%, signal=31%	Stat5b/Stx7/Sash3/H2-T22/Tnf/Cd24a/Raet1e/Tap2/Nlrp3/Tgfb1/Ptprc/Plcg2/Stap1/Cd40/Mill2/Kmt5b/Nectin2/P2rx7/H2-K1/Itgb2/Hfe/B2m/H2-D1/Tnfsf13/Ptafr/Fcgr3/Spi1/Fcer1g/Nod2/Tyrobp/Il1b/H2-Q4/H2-Q7/H2-T24/Fcgr1/Kit/Gimap5/H2-Q6/H2-T23/Trem2/Rsad2
GO:0002714	positive regulation of B cell mediated immunity	43	-0.641574	-1.95708	6.73532e-05	6.73532e-05	0.000971285	2020	tags=47%, list=15%, signal=40%	H2-T22/Tnf/Tgfb1/Ptprc/Cd40/Kmt5b/Nectin2/H2-K1/H2-D1/Tnfsf13/Fcgr3/Fcer1g/Nod2/H2-Q4/H2-Q7/Fcgr1/Gimap5/H2-Q6/H2-T23/Trem2
GO:0002891	positive regulation of immunoglobulin mediated immune response	43	-0.641574	-1.95708	6.73532e-05	6.73532e-05	0.000971285	2020	tags=47%, list=15%, signal=40%	H2-T22/Tnf/Tgfb1/Ptprc/Cd40/Kmt5b/Nectin2/H2-K1/H2-D1/Tnfsf13/Fcgr3/Fcer1g/Nod2/H2-Q4/H2-Q7/Fcgr1/Gimap5/H2-Q6/H2-T23/Trem2
GO:0007249	canonical NF-kappaB signal transduction	222	-0.412401	-1.61441	6.75325e-05	6.75325e-05	0.000971285	2883	tags=40%, list=21%, signal=32%	Peli1/Rela/Optn/Malt1/Fbxw11/Lamtor5/Traf3ip2/Card6/Alpk1/Traf6/Il1a/Esr1/Eda2r/Trim8/Arrb2/Card11/Nfat5/Tirap/Tnip2/Bcl3/Edn1/Nfkbil1/Zc3hav1/Nr1d1/Tle1/Usp25/Terf2ip/Clec4n/Rbck1/Map3k14/Casp1/Rhoh/Irak2/Rnf31/Zc3h12a/Irak4/Tmem106a/Lilrb4a/Tgfbr3/Ep300/Casp8/Adam8/Tlr7/Tlr4/Tank/Tnf/Mid2/Tgfb1/Plcg2/Nod1/Tnip3/Pink1/Trim12a/Dab2ip/Hspb1/Irf1/Trim5/Gprc5b/Tlr2/Stat1/Tifa/Ikbkb/Trim12c/Rassf2/Tr…
GO:1900225	regulation of NLRP3 inflammasome complex assembly	35	-0.663937	-1.93523	7.12092e-05	7.12092e-05	0.00101496	2909	tags=49%, list=21%, signal=38%	Ptpn22/Fbxl2/Mavs/Ddx3x/Casp4/Mark4/Eif2ak2/Tlr4/Atat1/Plcg2/Irgm2/Igtp/Trim30a/Cd36/Irgm1/Gbp5/Trem2
GO:0055080	monoatomic cation homeostasis	427	-0.350661	-1.46514	7.12252e-05	7.12252e-05	0.00101496	2015	tags=23%, list=15%, signal=20%	Tcirg1/Slc4a8/Trim24/Trpv4/Vps54/Cxcl10/Plcg1/Coro1a/Mcoln1/Abcb7/Tmem178/Vps33a/Wnk1/Atp6v0d2/Anxa7/Atox1/Slc39a10/Grina/Tgfb1/Atp6v0a1/Slc12a2/Ptprc/Plcg2/P2ry2/Atp1b3/Cd40/Fgfr3/Dmd/Cln3/Hyal2/Tmtc2/Klhl3/Slc31a2/Slc24a5/Steap4/Cyb561/Plcb4/Ccr5/Mapk3/Slc12a6/Slc12a9/P2rx7/Stc1/Gstm7/Cdh23/Hfe/Bmp6/Ccl8/B2m/Slc8b1/Pik3cb/Slc12a7/Atp13a2/Itpr3/Ptpn6/Aplp2/Atp2b4/Chd7/Lyn/Gm6377/Cngb1/Plcb1/Tgm2…
GO:0045055	regulated exocytosis	163	-0.445595	-1.68976	7.14746e-05	7.14746e-05	0.00101496	2267	tags=32%, list=16%, signal=27%	Fes/Stxbp2/Abr/Pld2/Bcr/Npy1r/Rab11b/Slc4a8/Rab11fip5/Syn2/Tspan18/Rab27a/Coro1a/Stxbp5/Vamp3/Nckap1l/Gnai2/Lgals9/Cplx2/P2ry2/Lat2/Git1/Gata2/Myo1f/Git2/Bcl2l1/Plek/Orai1/P2rx7/Syt15/Cacna1h/Itgb2/Syk/Notch1/Rac2/Ptafr/Spi1/Fcer1g/Rapgef4/Syt7/Lyn/Rph3al/Cd300a/Syngr1/Kcnb1/Cd84/Prkcb/Unc13b/Ccr2/Kit/Fcgr4/Chga
GO:0031341	regulation of cell killing	75	-0.545111	-1.84708	7.15942e-05	7.15942e-05	0.00101496	1714	tags=44%, list=12%, signal=39%	Raet1e/Nckap1l/Tap2/Lgals9/Tgfb1/Tap1/Ptprc/Cr1l/Stap1/Mill2/Nectin2/Ccr5/P2rx7/H2-K1/Hfe/Syk/B2m/H2-D1/Spi1/Il7r/Tyrobp/Clec2d/Ceacam1/H2-Q4/Igf2/Cx3cr1/H2-Q7/Nos2/H2-T24/Gimap5/H2-Q6/Pik3r6/H2-T23
GO:0046635	positive regulation of alpha-beta T cell activation	67	-0.564767	-1.89114	7.17338e-05	7.17338e-05	0.00101496	2180	tags=43%, list=16%, signal=37%	Lilrb4a/Tyk2/Jak2/Runx3/Sash3/H2-T22/Cd24a/Nckap1l/Nlrp3/Ptprc/Irf1/Cd83/Nfkbid/H2-K1/Syk/H2-D1/H2-Ab1/Itpkb/Hlx/H2-Q4/H2-Q7/Il2rg/Ccr2/Irgm1/Gimap5/H2-Q6/H2-T23/Zbtb16/Ccr7
GO:0050792	regulation of viral process	151	-0.453802	-1.70536	7.21865e-05	7.21865e-05	0.00101556	1538	tags=30%, list=11%, signal=27%	Ifi206/Apobec3/Ifitm1/Inpp5k/N4bp1/Oasl1/Trim12a/Gm11772/Adar/Ifitm3/Ifi207/Stom/Adarb1/Rnasel/Ifih1/Mndal/Trim5/Bst2/Stat1/Trim56/Ly6e/Trim12c/Trim25/Nectin2/Oas2/Trim30d/Notch1/Cd74/Ifi209/Znfx1/Trim21/Oas1a/Trim34a/Oasl2/Sp100/Ifi203/Isg15/Trim6/Cxcr4/Map3k1/Trim30a/Ch25h/Nr5a2/Ifi213/Rsad2/Ifi208
GO:0140888	interferon-mediated signaling pathway	69	-0.564908	-1.90071	7.24055e-05	7.24055e-05	0.00101556	2703	tags=42%, list=20%, signal=34%	Usp27x/Ifnar2/Mavs/Mmp12/Tyk2/Jak2/Tbk1/Samhd1/Ifitm1/Parp9/Adar/Ifitm3/Ifngr1/Irf1/Ifih1/Stat1/Trim56/Stat2/Oas2/Irgm2/Oas1a/Igtp/Isg15/Pparg/Trim6/Irf7/Nlrc5/Parp14/Irgm1
GO:0007219	Notch signaling pathway	139	-0.472545	-1.75183	7.24753e-05	7.24753e-05	0.00101556	1832	tags=32%, list=13%, signal=28%	Ift172/Tbx2/Numb/Adam17/Rcan2/Foxc1/Prag1/Bmp2/Cdk6/Tgfb1/Zmiz1/Aph1c/Arrdc1/Kctd10/Hey1/Gata2/Fat4/Eya1/Adam10/Dtx3l/Tcim/Tspan14/Notch1/Epn2/Notch3/Nod2/Arrb1/Neurl1b/Jag2/Lfng/Gdpd5/Sorbs2/Notch4/Egfl7/Mfng/Dll1/Hhex/Ptp4a3/Kit/Tspan15/Robo2/Kcna5/Dll4/Nrarp/Nrip2
GO:1902850	microtubule cytoskeleton organization involved in mitosis	147	0.464509	1.72936	7.39827e-05	7.39827e-05	0.00103336	3190	tags=37%, list=23%, signal=29%	Cenph/Gpsm2/Stil/Mybl2/Prc1/Tubg2/Nek2/Spdl1/Spc25/Birc5/Kif11/Uhrf1/Cdk1/Rcc1/Incenp/Tacc3/Cdca8/Aurkb/Plk1/Tpx2/Dlgap5/Kifc1/Ndc80/Kif4/Nuf2/Rangrf/Cenpe/Ccsap/Mcph1/Racgap1/Enkd1/Cdk5rap2/Gpsm1/Sass6/Parp3/Poldip2/Tubg1/Mad2l1/Kifc5b/Efhc1/Bora/Kpnb1/Poc1a/Kif2a/Hdac3/Wdr62/Cdc20/Ccnb1/Smc3/Map9/Cep97/Nup62/Plk3/Nudc/Flna
GO:0141085	regulation of inflammasome-mediated signaling pathway	47	-0.631837	-1.97896	7.45166e-05	7.45166e-05	0.00103749	2291	tags=49%, list=17%, signal=41%	Ddx3x/Casp4/Mark4/Eif2ak2/Trim11/Tlr4/Atat1/Ifi206/Plcg2/Ifi207/Mndal/Irgm2/Ifi209/Igtp/Ifi203/Trim30a/Gbp2/Cd36/Irgm1/Gbp5/Trem2/Ifi213/Ifi208
GO:0007052	mitotic spindle organization	119	0.484278	1.75481	7.54087e-05	7.54087e-05	0.00104657	3390	tags=42%, list=25%, signal=32%	Cenph/Gpsm2/Stil/Mybl2/Prc1/Tubg2/Nek2/Spc25/Birc5/Kif11/Uhrf1/Rcc1/Incenp/Tacc3/Cdca8/Aurkb/Plk1/Tpx2/Dlgap5/Kifc1/Ndc80/Kif4/Nuf2/Rangrf/Cenpe/Ccsap/Racgap1/Sass6/Parp3/Poldip2/Tubg1/Kifc5b/Efhc1/Bora/Kpnb1/Poc1a/Kif2a/Wdr62/Cdc20/Ccnb1/Smc3/Map9/Cep97/Nup62/Plk3/Nudc/Flna/Vcp/Aaas/Aurka
GO:0008652	amino acid biosynthetic process	43	0.636022	1.98116	7.64034e-05	7.64034e-05	0.00105701	2043	tags=40%, list=15%, signal=34%	Bcat1/Slc1a3/Phgdh/Plod2/Ass1/Pycr1/Aldh18a1/Dhfr/Abat/Aldh1a1/Gls2/Plod3/Psat1/Mri1/Mthfd1/Shmt2/Mtap
GO:0007224	smoothened signaling pathway	133	0.478061	1.76144	7.89201e-05	7.89201e-05	0.00108837	2676	tags=37%, list=19%, signal=30%	Sfrp1/Prrx2/Tedc1/Scube2/Shox2/Stil/Enpp1/Dzip1l/Evc/Ror2/Rab34/Prrx1/Wnt9a/Evc2/Kctd11/Gli3/Ift20/Serpine2/Rab23/Armc9/Runx2/Hhat/Tuba1a/Gli2/Ift27/Ext1/Gas1/Arl3/Tmed2/Tedc2/Smo/Tmem231/Chsy1/B9d1/Gpr161/Map3k10/Dync2h1/Wdpcp/Gpc3/Kif7/Tctn3/Ift57/Ift81/Uchl5/Boc/Tulp3/Gas8/Cdon/Stk36
GO:0031348	negative regulation of defense response	204	-0.41718	-1.62345	8.01814e-05	8.01814e-05	0.00110228	1743	tags=30%, list=13%, signal=27%	Cd24a/Tnfaip8l2/Zdhhc18/Tap2/Socs3/Lgals9/Nlrp3/Tgfb1/Tap1/Ifi206/Trafd1/Il10/Tnfrsf1b/Adar/Ifi207/Git1/Il20rb/Mndal/Nmi/Enpp3/Adora2a/Pf4/Stat2/Uaca/H2-K1/Tafa3/Irgm2/Rb1/Ets1/H2-D1/Ifi209/Ahr/Aoah/Il10ra/Trim21/Nod2/Ptpn6/Oas1a/Igtp/Clec2d/Pglyrp1/Ceacam1/Ifi203/Isg15/Pparg/Fcgr2b/H2-Q4/Igf2/Ctla2a/Cx3cr1/Apoe/Nlrc5/H2-Q7/Parp14/Irgm1/H2-Q6/H2-T23/Cd200/Cdh5/Trem2/Ifi213/Ifi208
GO:0006457	protein folding	145	0.453033	1.68684	8.08101e-05	8.08101e-05	0.00110743	3317	tags=44%, list=24%, signal=34%	Fkbp11/P3h1/Txndc5/Dnajc25/Ptges3l/Fkbp10/Dnajb3/P4hb/Cryab/Hspa5/Pdia5/Ppib/Fkbp5/Fkbp9/Pofut2/Pdia3/Nudcd2/Dnajc3/Pdia4/Sdf2l1/Hsp90b1/Hspd1/Calr/Prdx4/Dnlz/Fkbp2/Hsp90aa1/Hspa13/Bag1/Hsph1/Dnajc1/Qsox1/Hspe1/Tor1b/Ppil1/Ppih/Tor2a/Entpd5/Stub1/Tbcd/Grpel1/Ube4b/Dnajb1/Mesd/Dnajb11/Grpel2/Pdrg1/Ppif/Sdf2/Erp44/Dnajb4/Ahsa1/Selenof/Ppic/Sgta/Cct3/Pfdn1/Hspa14/Nudc/Fkbp4/Cct8/Cct7/Nktr/Tcp1
GO:0002573	myeloid leukocyte differentiation	226	-0.413577	-1.62496	8.27534e-05	8.27534e-05	0.00112816	2180	tags=35%, list=16%, signal=30%	Lilrb4a/Gpr183/Fosl2/Apc/Casp8/Adam8/Tcirg1/Nr3c1/Vps54/Tlr4/Tnf/Tmem178/Bmp2/Sbno2/Cd109/Cdk6/Klf10/Ccl3/Tgfb1/Ifi206/Bmp4/Lbr/Ctnnb1/Gpr137b/Fgfr3/Ifi207/Ctnnbip1/Hoxa7/Csf3/Gata2/Mndal/Tlr2/Zfpm1/Ucp2/Rassf2/Il15/Ccl9/Csf1r/Rb1/Gab3/Cd74/Ifi209/Tnfrsf11a/Batf3/Epha2/Spi1/Fcer1g/Prdm16/Tyrobp/Pirb/Clec2d/Ceacam1/Ifi203/Lyn/Inpp5d/Zbtb46/Ikzf1/Pparg/Plcb1/Mef2c/Kitl/Inpp4b/Tspan2/C1qc/Hhex/Kit/G…
GO:0140352	export from cell	688	-0.324059	-1.40303	8.31268e-05	8.31268e-05	0.00112816	2015	tags=25%, list=15%, signal=23%	Tcirg1/Myo1g/Rab11b/Slc4a8/Nr3c1/Trarg1/Scamp1/Trpv4/Tspan9/Il1rn/Rab11fip5/Rab8b/Ralb/Syn3/Grk2/Syn2/Tlr4/Tspan18/Slc30a4/Trappc11/Rab27a/Coro1a/Stxbp5/Tnf/Pik3c2a/Htr7/Vamp3/Nckap1l/Nagpa/Bmp2/Atp9a/Anxa7/Psap/Dpysl2/Gnai2/Lgals9/P2ry12/Cplx2/Myo6/Slc25a22/Tgfb1/Sdcbp/Slc12a2/Gnaq/Lin7a/Pip5k1c/Ric1/Rgcc/Pink1/Klf7/Midn/Cd2ap/P2ry2/Cxcl12/Tnfrsf1b/Atp1b3/Apln/Lat2/Git1/Map2k6/Bloc1s6/Gata2/Abcg…
GO:0051784	negative regulation of nuclear division	57	0.587652	1.9187	8.32539e-05	8.32539e-05	0.00112816	2499	tags=51%, list=18%, signal=42%	Lif/Knl1/Ttk/Spdl1/Spc25/Spc24/Birc5/Trip13/Bub1/Incenp/Cdca8/Aurkb/Plk1/Ndc80/Gen1/Zwilch/Nuf2/Klhl22/Cenpe/Anapc15/Fbxo5/Zwint/Cdk5rap2/Atm/Chek1/Mad2l1/Rad1/Haspin/Kntc1
GO:0043408	regulation of MAPK cascade	548	-0.335696	-1.43157	8.34992e-05	8.34992e-05	0.00112816	1743	tags=24%, list=13%, signal=22%	Cd24a/Zdhhc17/Spred2/Insr/Bmp2/Psap/Id1/Gnai2/Cd27/Dusp7/Sash1/Ccl12/Ccl3/Tgfb1/Ptprc/Plcg2/Nod1/Sorbs3/Adrb2/Bmp4/Inpp5k/Mink1/Ctnnb1/Cxcl12/Trim12a/Rgs2/Ackr3/Cd40/Fgfr3/P2ry6/Dab2ip/Map2k6/Sema4c/Dmd/Cnksr3/Jcad/Sla/Trim5/Hyal2/Tlr2/C5ar1/Foxo1/Trim12c/Gdf15/Rassf2/Rapgef1/Taok2/Flt4/Dusp2/Sema7a/Fgd2/Sh3rf1/Fzd4/Dusp22/Mapk3/P2rx7/Dusp3/Nrp1/Ccl9/Syk/Pdgfd/Trim30d/Csf1r/Notch1/Ccl8/Osm/Itga1/…
GO:0031214	biomineral tissue development	132	0.479414	1.76839	8.36175e-05	8.36175e-05	0.00112816	1362	tags=30%, list=10%, signal=27%	Vdr/Lox/Comp/Twist1/Osr1/Fbn2/Bmpr1b/Tmem119/Pth1r/Enpp1/Col1a1/Col6a1/Wnt11/Pkdcc/Col1a2/Ptgs2/Tent5a/Aspn/Ptn/Mgp/Ltbp3/Bmpr1a/Slc8a1/Fgfr1/Igf1/Hacd1/Osr2/Nfix/Spp1/Dnm3os/Sgms2/Sox9/Nectin1/Fam20a/Gpm6b/Wls/Mia3/Runx2/Slc20a1
GO:0043534	blood vessel endothelial cell migration	112	-0.497075	-1.77359	8.60498e-05	8.60498e-05	0.0011574	2135	tags=46%, list=16%, signal=39%	Tgfbr3/Hdac7/Akt3/Adam17/Adam8/Plcg1/Tnf/Pik3c2a/Sp1/Meox2/Tgfb1/Hdac5/Rgcc/Angpt2/Cxcl12/Cd40/Hspb1/Cln3/Gata2/Jcad/Efnb2/Col18a1/Nrp1/Notch1/Ets1/Prkd2/Ephb4/Alox12/Epha2/Atp2b4/Vegfc/Vash1/Pparg/Prcp/Mef2c/Jup/Clec14a/Cxcr4/Robo4/Igf2/Apoe/Pdgfb/Hdac9/Card10/Nos3/Mmrn2/Cdh5/Scarb1/Kdr/Efna1/Dll4
GO:1990573	potassium ion import across plasma membrane	23	-0.736808	-1.9646	8.85657e-05	8.85657e-05	0.00118757	1735	tags=52%, list=13%, signal=46%	Wnk1/Slc12a2/Atp1b3/Slc12a6/Kcnj2/Slc12a7/Kcnq1/Slc12a5/Atp1b2/Atp1a2/Abcc9/Kcnj8
GO:0000724	double-strand break repair via homologous recombination	155	0.448202	1.67775	8.93297e-05	8.93297e-05	0.00119414	2430	tags=29%, list=18%, signal=24%	Usp51/Brca1/Mcm8/Aunip/Rad51/Gins2/Tonsl/Parpbp/Cdc45/Rpa2/Blm/Mms22l/Fancm/Mcm4/Recql4/Gen1/Swi5/Mcm5/Mcm7/Brca2/Sfr1/Helb/Mcm2/Mcm3/Rad54l/Rad51ap1/Zswim7/Mcm6/Xrcc2/Rad54b/Gins4/Morf4l2/Polq/Cdc7/Rmi2/Spidr/Atm/Ooep/Rpa1/Chek1/Topbp1/Nucks1/Rbbp8/Xrcc1/Smc6
GO:0039531	regulation of cytoplasmic pattern recognition receptor signaling pathway	102	-0.498607	-1.7709	9.16712e-05	9.16712e-05	0.00122169	2947	tags=39%, list=21%, signal=31%	Slc15a2/Ptpn22/Fbxl2/Tirap/Zc3hav1/Mavs/Pum2/Ddx3x/Casp4/Mark4/Eif2ak2/Trim11/Dhx58/Sec14l1/Tlr4/Atat1/Zdhhc18/Ifi206/Plcg2/Oasl1/Ifi207/Mndal/Slc15a3/Nop53/Rnf125/Irgm2/Ifi209/Igtp/Ifi203/Trim30a/Ddx60/Gbp2/Cd36/Irgm1/Cav1/Gbp5/Trem2/Ifi213/Rsad2/Ifi208
GO:0003015	heart process	172	-0.435383	-1.65979	9.30795e-05	9.30795e-05	0.00123668	1649	tags=23%, list=12%, signal=20%	Gnai2/Rps6ka2/Pde4b/Adrb2/Rgs2/Apln/Mef2a/Map2k6/Dmd/Tnni2/Gja1/Ehd3/Stc1/Ace/Cacna1h/Kcnj2/Gch1/Agrn/Atp2b4/Jup/Cxcr4/Kcnq1/Agtr2/Cav1/Epas1/Nos3/Hrc/Slc1a1/Ednrb/Kcna5/Gja5/Ramp3/Edn3/Hopx/Atp1a2/Chga/Abcc9/Casq2/Kcnj8
GO:0006887	exocytosis	261	-0.39236	-1.55954	9.53498e-05	9.53498e-05	0.00125476	2481	tags=31%, list=18%, signal=26%	Fbxl20/Napb/Exoc3l4/Hap1/Synj1/Exoc2/Lin7c/Rab11a/Fes/Stxbp2/Abr/Pld2/Bcr/Npy1r/Myo1g/Rab11b/Slc4a8/Trarg1/Scamp1/Rab11fip5/Rab8b/Ralb/Syn2/Tspan18/Trappc11/Rab27a/Coro1a/Stxbp5/Pik3c2a/Vamp3/Nckap1l/Atp9a/Gnai2/Lgals9/Cplx2/Sdcbp/Lin7a/Pip5k1c/P2ry2/Lat2/Git1/Bloc1s6/Gata2/Exoc8/Myo1f/Git2/Bcl2l1/Plek/Orai1/P2rx7/Syt15/Cacna1h/Itgb2/Syk/Notch1/Ccl8/Atp13a2/Rac2/Ptafr/Spi1/Fcer1g/Rapgef4/Syt7/Lyn…
GO:0002483	antigen processing and presentation of endogenous peptide antigen	20	-0.759679	-1.97941	9.54136e-05	9.54136e-05	0.00125476	2230	tags=75%, list=16%, signal=63%	Tapbp/H2-T22/Raet1e/Tap2/Tap1/Mill2/H2-K1/Hfe/B2m/H2-D1/H2-Q4/H2-Q7/H2-T24/H2-Q6/H2-T23
GO:0019885	antigen processing and presentation of endogenous peptide antigen via MHC class I	20	-0.759679	-1.97941	9.54136e-05	9.54136e-05	0.00125476	2230	tags=75%, list=16%, signal=63%	Tapbp/H2-T22/Raet1e/Tap2/Tap1/Mill2/H2-K1/Hfe/B2m/H2-D1/H2-Q4/H2-Q7/H2-T24/H2-Q6/H2-T23
GO:0002861	regulation of inflammatory response to antigenic stimulus	30	-0.693821	-1.97461	9.56176e-05	9.56176e-05	0.00125476	2020	tags=60%, list=15%, signal=51%	H2-T22/Tnf/Cd24a/Il10/Il20rb/H2-K1/H2-D1/Fcgr3/Fcer1g/Nod2/Fcgr2b/H2-Q4/H2-Q7/Fcgr1/H2-Q6/H2-T23/Trem2/Ccr7
GO:0048514	blood vessel morphogenesis	552	-0.337843	-1.43782	9.58797e-05	9.58797e-05	0.00125476	1778	tags=28%, list=13%, signal=26%	Foxc1/Lrg1/Hspg2/Sp1/Wnk1/Wasf2/Meox2/Id1/Nras/Sash1/Ccl12/Tgfb1/Zmiz1/Slc12a2/Nr2f2/Hdac5/Adrb2/Bmp4/Rgcc/Pnpla6/Heg1/Angpt2/Ctnnb1/Il10/Cxcl12/Ago1/Ackr3/Erap1/Apln/Mylk/Smad1/Cd40/Kctd10/Ecscr/Dab2ip/Hspb1/Hey1/Gata2/Jcad/Lrp5/Stat1/Pxn/C5ar1/Tcf4/Prkx/Elk3/Eya1/Thsd7a/Flt4/Fzd4/Gja1/Hoxa5/Efnb2/Col18a1/Glul/Ace/Adam15/Ptprm/Eng/Nrp1/Nrp2/Itgb2/Syk/Notch1/Ets1/Apold1/Dysf/Tjp1/Ahr/Prkd2/Pik3cb…
GO:0010631	epithelial cell migration	279	-0.394579	-1.57495	9.71265e-05	9.71265e-05	0.00126348	2373	tags=39%, list=17%, signal=33%	Gadd45a/Ptk2/Gata3/Rab11a/Rras/Iqsec1/Krit1/Zc3h12a/Adipor1/Macf1/Tgfbr3/Hdac7/Apc/Akt3/Adam17/Adam8/Evl/Plcg1/Coro1a/Coro1b/Patz1/Tnf/Lpxn/Pik3c2a/Lrg1/Sp1/Meox2/Kank1/Enpp2/Sash1/Tgfb1/Plcg2/Nr2f2/Hdac5/Bmp4/Rgcc/Angpt2/Rreb1/Cxcl12/Actn4/Cd40/Atoh8/Dab2ip/Hspb1/Cln3/Gata2/Jcad/Plekhg5/Pxn/Flt4/Daam2/Pkn1/Efnb2/Col18a1/Glul/Stc1/Ptprm/Nrp1/Itgb2/Notch1/Ets1/Ppm1f/Prkd2/Pik3cb/Ephb4/Alox12/Plpp3…
GO:0090132	epithelium migration	279	-0.394579	-1.57495	9.71265e-05	9.71265e-05	0.00126348	2373	tags=39%, list=17%, signal=33%	Gadd45a/Ptk2/Gata3/Rab11a/Rras/Iqsec1/Krit1/Zc3h12a/Adipor1/Macf1/Tgfbr3/Hdac7/Apc/Akt3/Adam17/Adam8/Evl/Plcg1/Coro1a/Coro1b/Patz1/Tnf/Lpxn/Pik3c2a/Lrg1/Sp1/Meox2/Kank1/Enpp2/Sash1/Tgfb1/Plcg2/Nr2f2/Hdac5/Bmp4/Rgcc/Angpt2/Rreb1/Cxcl12/Actn4/Cd40/Atoh8/Dab2ip/Hspb1/Cln3/Gata2/Jcad/Plekhg5/Pxn/Flt4/Daam2/Pkn1/Efnb2/Col18a1/Glul/Stc1/Ptprm/Nrp1/Itgb2/Notch1/Ets1/Ppm1f/Prkd2/Pik3cb/Ephb4/Alox12/Plpp3…
GO:0043087	regulation of GTPase activity	271	-0.393478	-1.57384	9.76336e-05	9.76336e-05	0.0012663	2192	tags=29%, list=16%, signal=25%	Sos1/Rhog/Bcr/Dock8/Mmut/Bbs4/Asap2/Tbc1d8/Adap1/Prex1/Sema4d/Srgap2/Sh3bp4/Rapgef2/Chn2/Tbc1d22b/Wnk1/Snx13/Sos2/Ccl12/Ccl3/Tbc1d4/Gmip/Ric1/Fgd6/Rgp1/Gpr137b/Cd40/Arhgap29/Arhgap45/Dab2ip/Rgs16/Rasgrp4/Ralgapa1/Rasgef1b/Ripor1/Rapgef1/Tbc1d22a/Chn1/Dock6/Rasa4/Gpr65/Pkp4/Ccl9/Arhgef7/Ccl8/Ralgapa2/Epha2/Agrn/Rapgef4/Lrch1/Arhgef5/Rapgef5/Arap2/Plxnd1/Plxna2/Rasgrp2/Rasip1/Arap3/Tbc1d2/Cav2/Rapg…
GO:0002064	epithelial cell development	171	-0.44044	-1.67802	9.80694e-05	9.80694e-05	0.00126818	2586	tags=39%, list=19%, signal=32%	Rap1a/Epb41l5/Met/Rara/C1galt1/Myadm/Flnb/Tjp2/Lamb2/Rilpl1/Clic4/Fosl2/Plec/Msn/Tigar/Rapgef2/Tnf/Sfn/Psap/Id1/Cdk6/Tgfb1/Tmod1/Bmp4/Heg1/Fgfr3/Dmd/Gata2/Sipa1/Ikbkb/Rapgef1/Gja1/Rarb/Hoxa5/Col18a1/Stc1/Bmp6/Notch1/Tjp1/Rarg/Epha2/Abcb1b/Il1b/Afdn/Plcb1/Cldn5/Cxcr4/Map3k1/Robo4/Pecam1/Rapgef3/Notch4/Ccdc88c/Pdgfb/Dll1/Pde2a/Prdm1/Ppp1r16b/Spint2/Epas1/Cdh5/Kdr/Gpr4/F11r/Ednrb/Sox18/Tmigd1
GO:0045580	regulation of T cell differentiation	151	-0.448851	-1.68675	0.000101284	0.000101284	0.00130588	2567	tags=36%, list=19%, signal=29%	Cyp26b1/Rara/Arid1a/Smarcd1/Il2ra/Rhoh/Gata3/Lck/Stat5b/Zc3h12a/Sos1/Rc3h1/Lilrb4a/Runx3/Zfp608/Sash3/Adam8/Nckap1l/Sos2/Cd27/Lgals9/Nlrp3/Tgfb1/Zmiz1/Ptprc/Bmp4/H2-DMa/Hspb1/Irf1/Il4i1/Jak3/Pf4/Sh3rf1/Cd83/Nfkbid/H2-Aa/Il15/Syk/Cd74/Itpkb/Il7r/Sh2b3/Sox13/Hlx/Vsir/Ctla2a/Il2rg/Ccr2/Prdm1/Gimap5/Pik3r6/Zbtb16/Nrarp/Ccr7
GO:0000727	double-strand break repair via break-induced replication	12	0.849997	1.98712	0.000101668	0.000101668	0.00130696	1890	tags=83%, list=14%, signal=72%	Gins2/Cdc45/Mcm4/Mcm5/Mcm7/Mcm2/Mcm3/Mcm6/Gins4/Cdc7
GO:1905144	response to acetylcholine	30	-0.692147	-1.96985	0.000103181	0.000103181	0.0013225	1741	tags=50%, list=13%, signal=44%	Chrnb1/Anxa7/Gnai2/Gnaq/Sorbs1/Bloc1s6/Ly6e/Orai1/Atp2b4/Ly6a/Plcb1/Prkcb/Ly6c1/Sorbs2/Ly6g6d
GO:0060333	type II interferon-mediated signaling pathway	18	-0.775048	-1.97217	0.000104611	0.000104611	0.0013369	2171	tags=67%, list=16%, signal=56%	Tyk2/Jak2/Parp9/Ifngr1/Irf1/Stat1/Irgm2/Igtp/Pparg/Nlrc5/Parp14/Irgm1
GO:0002885	positive regulation of hypersensitivity	14	-0.820199	-1.93846	0.000105133	0.000105133	0.00133839	978	tags=71%, list=7%, signal=66%	H2-K1/H2-D1/Fcgr3/Fcer1g/H2-Q4/H2-Q7/Fcgr1/H2-Q6/H2-T23/Ccr7
GO:0090177	establishment of planar polarity involved in neural tube closure	15	0.804513	1.97021	0.000105341	0.000105341	0.00133839	807	tags=47%, list=6%, signal=44%	Sfrp1/Sfrp2/Cthrc1/Fzd2/Wnt5a/Fzd1/Ptk7
GO:0045069	regulation of viral genome replication	81	-0.536136	-1.83298	0.00010783	0.00010783	0.00136602	1538	tags=35%, list=11%, signal=31%	Ifi206/Apobec3/Ifitm1/Inpp5k/N4bp1/Oasl1/Gm11772/Adar/Ifitm3/Ifi207/Adarb1/Rnasel/Ifih1/Mndal/Bst2/Oas2/Notch1/Ifi209/Znfx1/Oas1a/Oasl2/Ifi203/Isg15/Trim6/Nr5a2/Ifi213/Rsad2/Ifi208
GO:0019883	antigen processing and presentation of endogenous antigen	22	-0.736629	-1.94533	0.000110981	0.000110981	0.00140186	2230	tags=68%, list=16%, signal=57%	Tapbp/H2-T22/Raet1e/Tap2/Tap1/Mill2/H2-K1/Hfe/B2m/H2-D1/H2-Q4/H2-Q7/H2-T24/H2-Q6/H2-T23
GO:0090068	positive regulation of cell cycle process	222	0.410283	1.6019	0.000111367	0.000111367	0.00140267	2126	tags=29%, list=15%, signal=25%	Cdca5/Gpsm2/Rrm2/Stil/Knl1/Ube2c/Wnt5a/Ccne2/Plk4/Sphk1/Kif14/Ccne1/Ccn2/E2f8/Anxa1/Orc1/Dtl/Birc5/Ncapg2/Fgfr1/Egfr/Igf1/Bub1/Ncapg/Cdk1/Incenp/Spag5/Rrm1/Ect2/Atad5/Cdca8/Ezh2/Rad18/Kif20b/Cdc25c/Aurkb/Fen1/Ndc80/Gen1/Smc2/Cenpe/Fam83d/Cdc16/Racgap1/Fbxo5/Rad51ap1/Tert/Npm1/Sass6/Ranbp1/Ddr2/Cdc6/Apex1/Ncaph/Poldip2/Smc4/Lmnb1/Lsm11/Cdc7/Pebp1/Ncapd3/Ooep/Cdk4/Ube2e2/Sgo2a
GO:0006816	calcium ion transport	299	-0.383408	-1.54159	0.000113177	0.000113177	0.00142136	1649	tags=26%, list=12%, signal=24%	Trpv4/Cxcl10/Fyn/Pawr/Plcg1/Tspan18/Coro1a/Mcoln1/Gnai2/Il16/P2ry12/Stac/Tgfb1/Ptprc/Pde4b/Plcg2/Adrb2/Bmp4/Cacng1/Inpp5k/Ctnnb1/Cxcl12/Mylk/Dmd/Jak3/Tmem37/Slc24a5/Adora2a/Gja1/Ehd3/Plcb4/Ccr5/Orai1/P2rx7/Stc1/Ace/Gstm7/Cdh23/Cacna1h/Ccl8/Dysf/Ahr/Slc8b1/Mrln/Calcrl/Itpr3/Ptpn6/Atp2b4/Chd7/Lyn/Plcb1/Pik3cg/Cd84/Ramp2/Cxcr4/Slc30a1/Prkcb/Rapgef3/Cracr2b/Pdgfb/Cysltr1/Cav1/Gimap5/F2rl3/Nos3/Atp2a3…
GO:0060627	regulation of vesicle-mediated transport	455	-0.348706	-1.46384	0.000116308	0.000116308	0.00145649	2958	tags=35%, list=21%, signal=28%	Sod1/Cd47/Mapk1/Dync1li1/Tnk2/Dnm2/Lrrk2/Cadps2/Arrb2/S100a10/Itgam/Pld1/Btbd9/Dnajc13/Plk2/Rdx/Rab12/Mib1/Stxbp1/Rap1a/Mtmr2/Dgkq/Sirpb1c/Mkln1/Fbxl20/Napb/Hap1/Synj1/Exoc2/Nedd4l/Ptk2/Vac14/Rab11a/Dab2/Fes/Stxbp2/Abr/Iqsec1/Nr1h2/Pld2/Cnst/Cfp/Rubcn/Bcr/Lgals3/Numb/Npy1r/Rab11b/Slc4a8/Msn/Ophn1/Rab8b/Rab27a/Dgkd/Coro1a/Ldlrap1/Stxbp5/Inpp5f/Cbl/Ankrd13a/Ston1/Insr/Nckap1l/Atp9a/Gnai2/Lgals9/Lyp…
GO:0003012	muscle system process	323	-0.371967	-1.51091	0.000117577	0.000117577	0.00146816	2100	tags=25%, list=15%, signal=22%	Ep300/Tmod3/Tbx2/Npy1r/Nr3c1/Trpv4/Pde9a/Vps54/Gpd1l/Grk2/Pawr/Tnnc2/Inpp5f/Htr7/Chrnb1/Bmp2/Igfbp5/Stac/Pde4b/Tmod1/Adrb2/Bmp4/Cacng1/Rgs2/Tnfrsf1b/Mylk/Mef2a/Smad1/Map2k6/Camta2/Dmd/Tnni2/Jarid2/Lmcd1/Foxo1/Gatm/Ehd3/Synm/Stc1/Dock4/Acacb/Cacna1h/Kcnj2/Notch1/Ece1/Calcrl/Apbb2/Tbx3/Ptafr/Aif1/Agrn/Ptgs1/Atp2b4/Pparg/Rcsd1/Mef2c/Jup/Flt1/Cxcr4/Sorbs2/Itga2/Kcnq1/Lmod1/Agtr2/Cav1/Kit/Ncf1/Nos3/Hr…
GO:0044786	cell cycle DNA replication	38	0.643278	1.95777	0.000118199	0.000118199	0.00147171	1991	tags=58%, list=14%, signal=50%	Rad51/E2f8/Cdc45/Fgfr1/Atad5/Gins3/Mcm4/Donson/Tk1/Mcm5/Lig1/Mcm7/Brca2/Mcm2/Zpr1/Mcm3/Fbxo5/Mcm6/Pcna/Gins1/Cdc7/Cdt1
GO:1903522	regulation of blood circulation	176	-0.436023	-1.66797	0.000118804	0.000118804	0.00147371	1525	tags=24%, list=11%, signal=22%	Pde4b/Adrb2/Rgs2/Apln/Itga9/Mef2a/Dmd/Gja1/Ehd3/Stc1/Ace/Dock4/Cacna1h/Kcnj2/Ahr/Gch1/Mgll/Agrn/Ptgs1/Atp2b4/Jup/Itga4/Pdgfb/Cysltr1/Kcnq1/Agtr2/Cav1/Epas1/Nos3/Hrc/Slc1a1/Ednrb/Kcna5/Gja5/Cd38/Edn3/Hopx/Tbxas1/Atp1a2/Chga/Abcc9/Casq2/Kcnj8
GO:0002418	immune response to tumor cell	23	-0.730308	-1.94726	0.000119036	0.000119036	0.00147371	1743	tags=57%, list=13%, signal=49%	Cd24a/Tgfb1/Il4i1/Nectin2/H2-K1/Adam15/H2-D1/Ahr/Ceacam1/H2-Q4/H2-Q7/H2-Q6/Cd274
GO:0019953	sexual reproduction	638	0.3235	1.39081	0.00012025	0.00012025	0.00148452	2263	tags=23%, list=16%, signal=20%	Rbp4/Fst/Rbm46/Lif/Ptx3/Adamts16/Rpl39l/Bmpr1b/Tmem119/Cyp51/Ndn/Ly6k/Tnfaip6/Pla2g4a/Tyro3/Mcm8/Knl1/Mdk/Ccdc136/Wnt5a/Col6a1/4930447C04Rik/Ccne2/Adamts2/B4galnt1/Ttk/Ccne1/Inhba/Rad51/Tubg2/Ptn/Aspm/Nek2/H19/Top2a/Exo1/Cks2/M1ap/Birc5/Pgm3/Trip13/Igf1/Brip1/Spaca1/Meg3/Rnase10/Pkmyt1/Sgo1/Psmc3ip/Incenp/Fancm/Ddias/Fancf/Ttll5/Pafah1b3/Nkd1/Rad18/Cdc25c/Ift20/Chtf18/Cenps/Dnmt3l/Spata24/Sox9/Ci…
GO:0060349	bone morphogenesis	84	0.5279	1.82159	0.000122486	0.000122486	0.00150785	1783	tags=36%, list=13%, signal=31%	Comp/Twist1/Scx/Thbs1/Tmem119/Scube2/Shox2/Col27a1/Has2/Enpp1/Col1a1/Col3a1/Thbs3/Ltbp3/Frem1/Csgalnact1/Osr2/Gli3/Nfix/Sox9/Serpinh1/Rab23/Tmem107/Runx2/Mmp16/Ext1/Carm1/Fgf18/Mmp14/Chsy1
GO:0051225	spindle assembly	117	0.474312	1.71103	0.000124305	0.000124305	0.00152216	3190	tags=42%, list=23%, signal=32%	Gpsm2/Stil/Mybl2/Prc1/Aspm/Nek2/Birc5/Kif11/Uhrf1/Rcc1/Incenp/Spag5/Cdca8/Haus6/Aurkb/Plk1/Tpx2/Kifc1/Ndc80/Rangrf/Cenpe/Ccsap/Racgap1/Fbxo5/Sass6/Sac3d1/Poldip2/Haus8/Haus1/Haus4/Ddb1/Kifc5b/Tubgcp2/Haus7/Kpnb1/Kif2a/Mlh1/Hdac3/Tubgcp4/Rps3/Tubb5/Cdc20/Smc3/Map9/Haus3/Cep97/Haus5/Gtf2b/Flna
GO:0060047	heart contraction	161	-0.439055	-1.66503	0.000124346	0.000124346	0.00152216	1525	tags=22%, list=11%, signal=20%	Pde4b/Adrb2/Rgs2/Apln/Mef2a/Map2k6/Dmd/Tnni2/Gja1/Ehd3/Stc1/Ace/Cacna1h/Kcnj2/Gch1/Agrn/Atp2b4/Jup/Cxcr4/Kcnq1/Agtr2/Cav1/Epas1/Nos3/Hrc/Slc1a1/Ednrb/Kcna5/Gja5/Edn3/Hopx/Atp1a2/Chga/Abcc9/Casq2/Kcnj8
GO:0045005	DNA-templated DNA replication maintenance of fidelity	52	0.60329	1.95148	0.000126386	0.000126386	0.00154279	2392	tags=42%, list=17%, signal=35%	Brca1/Rad51/Tonsl/Blm/Mms22l/Fancm/Traip/Cenps/Donson/Gen1/Bard1/Brca2/Carm1/Pole/Pold1/Pcna/Polq/Eme1/Ooep/Nucks1/Rbbp8/Rad50
GO:0043300	regulation of leukocyte degranulation	39	-0.650466	-1.93925	0.000127345	0.000127345	0.00155016	2267	tags=46%, list=16%, signal=39%	Fes/Stxbp2/Abr/Pld2/Bcr/Nckap1l/Lgals9/Gata2/Itgb2/Syk/Rac2/Ptafr/Spi1/Fcer1g/Lyn/Cd300a/Cd84/Ccr2
GO:0010959	regulation of metal ion transport	301	-0.37536	-1.50938	0.000128748	0.000128748	0.00156287	1943	tags=28%, list=14%, signal=24%	Cxcl10/Gpd1l/Fyn/Fxyd5/Pawr/Plcg1/Tspan18/Coro1a/Pik3c2a/Wnk1/Gnai2/Il16/P2ry12/Stac/Tgfb1/Gnaq/Pde4b/Plcg2/Adrb2/Bmp4/Cacng1/Inpp5k/Ctnnb1/Cxcl12/Atp1b3/Mylk/Hecw2/Dmd/Cnksr3/Slc31a2/Jak3/Ikbkb/Adora2a/Gja1/Klhl24/Ehd3/Plcb4/Orai1/P2rx7/Stc1/Ace/Gstm7/Hfe/Kcnj2/B2m/Dysf/Ahr/Slc8b1/Mrln/Agrn/Ptpn6/Atp2b4/Chd7/Lyn/Plcb1/Pik3cg/Cd84/Chp2/Cxcr4/Slc30a1/Rapgef3/Cracr2b/Pdgfb/Kcnq1/Cav1/Gimap5/Atp1b2/…
GO:0032946	positive regulation of mononuclear cell proliferation	117	-0.470042	-1.69407	0.000132396	0.000132396	0.00160269	2233	tags=38%, list=16%, signal=32%	Stat5b/Gpr183/Tyk2/Jak2/Cd59a/Sash3/Nck2/Efnb1/H2-T22/Tlr4/Coro1a/Cd24a/Nckap1l/Slc39a10/Nck1/Ptprc/Cd86/St6gal1/Cd40/Jak3/Bcl2l1/H2-K1/Il15/Syk/Csf1r/H2-D1/Cd74/Aif1/Flt3l/Bst1/Il1b/Mef2c/Kitl/H2-Q4/Igf2/H2-Q7/Ccr2/Irgm1/H2-Q6/H2-T23/Icosl/Cd38/Cd274/Ighm/Ccr7
GO:0002437	inflammatory response to antigenic stimulus	49	-0.598292	-1.88632	0.000134173	0.000134173	0.0016197	2180	tags=51%, list=16%, signal=43%	Lilrb4a/Fosl2/H2-T22/Il1rn/Tnf/Cd24a/Il10/Il20rb/H2-K1/Notch1/H2-D1/Cd68/Fcgr3/Fcer1g/Nod2/Fcgr2b/H2-Q4/H2-Q7/Cysltr1/Fcgr1/H2-Q6/H2-T23/Trem2/Fcgr4/Ccr7
GO:0060541	respiratory system development	205	0.410772	1.58497	0.000141432	0.000141432	0.00170262	1758	tags=28%, list=13%, signal=25%	Rbp4/Lox/Aldh1a3/Aldh1a2/Lif/Rcn3/Tnc/Fgf7/Loxl3/Fbn1/Gpsm2/Ccbe1/Gng8/Adamtsl2/Wnt5a/Col6a1/Tgfb3/Pkdcc/Adamts2/Zfpm2/Col3a1/Msc/Ccn2/Mgp/Ltbp3/Bmpr1a/Pdpn/Fgfr1/Igf1/Fgf2/Fgfrl1/Meg3/Ptk7/Gli3/Vegfa/Sox9/Six1/Pdgfra/Hsd11b1/Speg/Hs6st1/Fndc3b/Lama1/Gli2/Aimp2/Tns3/Ext1/Foxp4/Hps1/Fgf18/Plod3/Ada/Rspo2/Six4/Mmp14/Hikeshi/Sparc
GO:0090101	negative regulation of transmembrane receptor protein serine/threonine kinase signaling pathway	117	0.471037	1.69921	0.000145216	0.000145216	0.00174335	1310	tags=23%, list=10%, signal=21%	Grem2/Sfrp1/Fst/Sfrp2/Cdh3/Cilp/Fbn2/Bmper/Fbn1/Ccn3/Tnfaip6/Vasn/Adamtsl2/Wnt5a/Tgfb3/Aspn/Emilin1/Lrp1/Fzd1/Lefty1/Pmepa1/Magi2/Hspa5/Tmem53/Rasl11b/Ltbp1/Ldlrad4
GO:0051092	positive regulation of NF-kappaB transcription factor activity	109	-0.485472	-1.73073	0.000151074	0.000151074	0.00179802	2883	tags=40%, list=21%, signal=32%	Eda2r/Trim8/Card11/Tirap/Lrrfip1/Terf2ip/Rbck1/Irak2/Rnf31/Cflar/Tgfbr3/Eif2ak2/Tlr4/Arhgef2/Tnf/Mid2/Nlrp3/Slco3a1/Plcg2/Nod1/Trim12a/Cd40/Trim5/Tlr2/Ikbkb/Trim12c/Trim25/Clu/Trim30d/Trim37/Traf1/Tnfrsf11a/Prkd2/Trim21/Nod2/Trim34a/Il1b/Trim6/Cd84/Trim30a/Tlr3/Prkch/Cd36/Aim2
GO:0048736	appendage development	160	0.435803	1.63477	0.00015109	0.00015109	0.00179802	1484	tags=26%, list=11%, signal=24%	Sfrp2/Prrx2/Aldh1a2/Comp/Smoc1/Lmx1b/Twist1/Osr1/Fbn2/Scx/Shox2/Sema3c/Crabp2/Enpp1/En1/Pitx1/Wnt5a/Col6a1/Pkdcc/B4galnt1/Pcsk5/Ror2/Alx4/Col3a1/Bmpr1a/Prrx1/Wnt9a/Hoxc10/Fgfr1/Aff3/Osr2/Gli3/Sox9/Rab23/Tmem107/Lnpk/Asph/Tgfb2/Runx2/Gli2/Ext1/Gas1
GO:0060173	limb development	160	0.435803	1.63477	0.00015109	0.00015109	0.00179802	1484	tags=26%, list=11%, signal=24%	Sfrp2/Prrx2/Aldh1a2/Comp/Smoc1/Lmx1b/Twist1/Osr1/Fbn2/Scx/Shox2/Sema3c/Crabp2/Enpp1/En1/Pitx1/Wnt5a/Col6a1/Pkdcc/B4galnt1/Pcsk5/Ror2/Alx4/Col3a1/Bmpr1a/Prrx1/Wnt9a/Hoxc10/Fgfr1/Aff3/Osr2/Gli3/Sox9/Rab23/Tmem107/Lnpk/Asph/Tgfb2/Runx2/Gli2/Ext1/Gas1
GO:0032102	negative regulation of response to external stimulus	311	-0.373611	-1.50792	0.00015142	0.00015142	0.00179802	1874	tags=30%, list=14%, signal=26%	Sema4d/Samhd1/Coro1b/Tnf/Inpp5f/Cd24a/Cd109/Tnfaip8l2/Zdhhc18/Tap2/Socs3/Lgals9/Nlrp3/Tgfb1/Tap1/Slc12a2/Ifi206/Rin3/Trafd1/Aph1c/Stap1/Angpt2/Il10/Cd9/Tnfrsf1b/Adar/St6gal1/Ifi207/Git1/Sema4c/Il20rb/Mndal/Nmi/Enpp3/Adora2a/Pf4/Sema7a/Stat2/Uaca/H2-K1/Tafa3/Dusp3/Irgm2/Nrp1/Sema3g/Rb1/Notch1/Ets1/H2-D1/Ifi209/Ahr/Alox12/Aoah/Il10ra/Aif1/Trim21/Nod2/Ptpn6/Oas1a/Igtp/Clec2d/Sh2b3/Pglyrp1/Sema6b/Cea…
GO:0002711	positive regulation of T cell mediated immunity	49	-0.595333	-1.87699	0.00015564	0.00015564	0.0018431	2158	tags=47%, list=16%, signal=40%	Gata3/Stx7/Sash3/H2-T22/Cd24a/Raet1e/Tap2/Nlrp3/Ptprc/Mill2/Nectin2/P2rx7/H2-K1/Hfe/B2m/H2-D1/Il1b/H2-Q4/H2-Q7/H2-T24/H2-Q6/H2-T23/Rsad2
GO:0033700	phospholipid efflux	10	-0.863297	-1.89593	0.000157787	0.000157787	0.00186346	818	tags=60%, list=6%, signal=56%	Abca7/Apoe/Abcg1/Abca1/Apoc2/Abca3
GO:0008608	attachment of spindle microtubules to kinetochore	47	0.612912	1.94715	0.000159457	0.000159457	0.00187811	1508	tags=38%, list=11%, signal=34%	Knl1/Nek2/Spc25/Spc24/Birc5/Ska1/Ska3/Sgo1/Incenp/Spag5/Ect2/Cdca8/Dsn1/Aurkb/Ndc80/Nuf2/Cenpe/Racgap1
GO:0002866	positive regulation of acute inflammatory response to antigenic stimulus	16	-0.793823	-1.95008	0.000163056	0.000163056	0.00191532	978	tags=62%, list=7%, signal=58%	H2-K1/H2-D1/Fcgr3/Fcer1g/H2-Q4/H2-Q7/Fcgr1/H2-Q6/H2-T23/Ccr7
GO:0014074	response to purine-containing compound	79	-0.523659	-1.78686	0.000164306	0.000164306	0.00192481	1923	tags=33%, list=14%, signal=28%	Tlr7/Npr2/Rapgef2/Igfbp5/P2ry12/Plcg2/Inpp5k/P2ry6/Rapgef1/Adora2a/Hmga1/Crem/P2rx7/Gstm7/Ahr/Itpr3/Il1b/Pik3cg/Rapgef3/Pde2a/Kcnq1/Aqp1/Trpc3/Abcc9/Casq2/Kcnj8
GO:0002720	positive regulation of cytokine production involved in immune response	73	-0.545476	-1.8482	0.000165485	0.000165485	0.00192891	2369	tags=48%, list=17%, signal=40%	Casp1/Gata3/Casp4/Sash3/H2-T22/Tlr7/Tlr4/Nlrp3/Irf5/Plcg2/Nod1/Gprc5b/Tlr2/Sema7a/P2rx7/H2-K1/Syk/B2m/H2-D1/Cd74/Fcer1g/Nod2/Laptm5/Il1b/Trim6/Tek/H2-Q4/Tlr3/H2-Q7/Cd36/Kit/Gimap5/H2-Q6/H2-T23/Rsad2
GO:0043535	regulation of blood vessel endothelial cell migration	87	-0.523232	-1.81624	0.000165542	0.000165542	0.00192891	2135	tags=48%, list=16%, signal=41%	Tgfbr3/Hdac7/Akt3/Adam17/Plcg1/Tnf/Pik3c2a/Sp1/Meox2/Tgfb1/Hdac5/Rgcc/Angpt2/Cd40/Hspb1/Gata2/Jcad/Col18a1/Nrp1/Notch1/Ets1/Prkd2/Alox12/Epha2/Atp2b4/Vegfc/Vash1/Pparg/Prcp/Mef2c/Jup/Robo4/Igf2/Apoe/Pdgfb/Hdac9/Card10/Nos3/Mmrn2/Kdr/Efna1/Dll4
GO:0031297	replication fork processing	47	0.61187	1.94384	0.000166544	0.000166544	0.00193456	2392	tags=43%, list=17%, signal=35%	Brca1/Rad51/Tonsl/Blm/Mms22l/Fancm/Traip/Cenps/Donson/Gen1/Bard1/Brca2/Carm1/Pcna/Polq/Eme1/Ooep/Nucks1/Rbbp8/Rad50
GO:0008217	regulation of blood pressure	127	-0.464657	-1.69469	0.000166914	0.000166914	0.00193456	1894	tags=35%, list=14%, signal=30%	Gna12/Nampt/Ptpro/Tnf/Wnk1/Rps6ka2/Arhgef12/Gnaq/Rnpep/Nav2/Nr2f2/Adrb2/Apln/Gja1/Ace/Eng/Ncf2/Ece1/Ahr/Ptafr/Gch1/Ptgs1/Vegfc/Pparg/Prcp/Ramp2/C3ar1/Pdgfb/Dll1/Nos2/Kcnq1/Agtr2/Enpep/Npr1/Nos3/Kdr/F11r/Ednrb/Gja5/Edn3/Gucy1a1/Atp1a2/Abcc9/Kcnj8
GO:1905145	cellular response to acetylcholine	27	-0.697666	-1.95358	0.000168841	0.000168841	0.0019517	1741	tags=52%, list=13%, signal=45%	Chrnb1/Anxa7/Gnai2/Gnaq/Sorbs1/Ly6e/Orai1/Atp2b4/Ly6a/Plcb1/Prkcb/Ly6c1/Sorbs2/Ly6g6d
GO:0051963	regulation of synapse assembly	92	0.501938	1.7549	0.000170986	0.000170986	0.00197126	2135	tags=35%, list=16%, signal=30%	Slit2/Nrg1/Srpx2/Ephb2/Ephb3/Abi3bp/Thbs2/Wnt5a/Mdga1/Prkca/Tpbg/Ptprs/Lrfn1/Numbl/Fzd1/Robo1/Lrfn4/Adgrl1/Bhlhb9/Ptpn13/Six1/Nectin1/St8sia2/Dlg4/Farp1/Adgrb2/Six4/Amigo3/Flrt3/Flrt2/Gpc4/Nlgn2
GO:0031334	positive regulation of protein-containing complex assembly	176	-0.432911	-1.65607	0.000173113	0.000173113	0.00199052	2659	tags=34%, list=19%, signal=28%	Icam1/Mtln/Creb1/Mavs/Met/Nckap1/Bmf/Fscn1/Ddx3x/Fes/Nr1h2/Casp4/Lgals3/Apc/Mark4/Piezo1/Nck2/Msn/Evl/Tlr4/Atat1/Tnf/Cd24a/Nckap1l/Vasp/Nck1/P2ry12/Tgfb1/Plcg2/Fnip2/Dab2ip/Git1/Csf3/Plek/Cdc42ep1/Cdc42ep3/Clu/Hip1r/Syk/Ahr/Cdc42ep2/Tppp/Isg15/Arhgef5/Ikzf1/Bik/Lcp1/Map3k1/Rasip1/Gbp2/Abca1/Unc13b/Abca3/Lmod1/Cd36/Cav1/Gbp5/Tal1/Cdh5/Gda
GO:0010875	positive regulation of cholesterol efflux	21	-0.744751	-1.97016	0.000176436	0.000176436	0.0020234	1158	tags=52%, list=8%, signal=48%	Ptch1/Abca7/Eepd1/Pparg/Apoe/Abcg1/Abca1/Abca3/Pltp/Cav1/Trem2
GO:1904064	positive regulation of cation transmembrane transport	103	-0.489335	-1.7388	0.000181746	0.000181746	0.00207882	1592	tags=28%, list=12%, signal=25%	Stac/Plcg2/Adrb2/Bmp4/Atp1b3/Dmd/Cnksr3/Ikbkb/Ehd3/P2rx7/Gstm7/Kcnj2/Plcb1/Chp2/Ctss/Rapgef3/Kcnq1/Cav1/Gimap5/Atp1b2/F2rl3/Trem2/Lrrc55/Clec4b1/Aplnr/Edn3/Trpc3/Akap5/Tesc
GO:0032653	regulation of interleukin-10 production	45	-0.610394	-1.88308	0.000185275	0.000185275	0.00211364	2180	tags=51%, list=16%, signal=43%	Lilrb4a/Sash3/Tlr4/Tusc2/Lgals9/Plcg2/Il20rb/Tlr2/Jak3/Cd83/Syk/Fcer1g/Nod2/Tyrobp/Trib2/Isg15/Fcgr2b/Cd84/Vsir/Dll1/Tnfrsf21/Trem2/Cd274
GO:1903900	regulation of viral life cycle	125	-0.467056	-1.701	0.000187078	0.000187078	0.00212678	2074	tags=38%, list=15%, signal=32%	Eif2ak2/Trim11/Tasor/Ciita/Tnf/Mid2/Ifi206/Apobec3/Ifitm1/Inpp5k/N4bp1/Oasl1/Trim12a/Gm11772/Adar/Ifitm3/Ifi207/Adarb1/Rnasel/Ifih1/Mndal/Trim5/Bst2/Trim56/Ly6e/Trim12c/Trim25/Nectin2/Oas2/Trim30d/Notch1/Cd74/Ifi209/Znfx1/Trim21/Oas1a/Trim34a/Oasl2/Ifi203/Isg15/Trim6/Trim30a/Ch25h/Nr5a2/Ifi213/Rsad2/Ifi208
GO:0032963	collagen metabolic process	104	0.483745	1.71608	0.000187403	0.000187403	0.00212678	1744	tags=35%, list=13%, signal=30%	Ccl2/Mfap4/Rcn3/Mmp23/Mrc2/Serpine1/Scx/P3h1/Col5a1/P3h3/Ctsk/Col1a1/Fn1/Col6a1/Tgfb3/Adamts2/Col1a2/Inhba/Emilin1/Ccn2/P3h4/F2r/Prdx5/Creb3l1/Mmp2/Fap/Mmp19/Serpinh1/Ltbp1/Mmp16/Gli2/Adamts3/Mkx/Plod3/Ddr2/Mmp14
GO:1901016	regulation of potassium ion transmembrane transporter activity	33	-0.653683	-1.90317	0.000190772	0.000190772	0.00215938	1388	tags=30%, list=10%, signal=27%	Atp1b3/Klhl24/Agrn/Kcnq1/Cav1/Atp1b2/Trem2/Lrrc55/Abcc9/Casq2
GO:1904888	cranial skeletal system development	61	0.568444	1.85988	0.00019253	0.00019253	0.00217364	1744	tags=38%, list=13%, signal=33%	Twist2/Prrx2/Twist1/Tbx15/Tgfb3/Frem1/Prrx1/Six2/Gli3/Six1/Pdgfra/Rab23/Sh3pxd2b/Tmem107/Tgfb2/Runx2/Cep55/Mthfd1l/Mmp16/Ext1/Gas1/Six4/Mmp14
GO:0050801	monoatomic ion homeostasis	434	-0.349502	-1.46125	0.000193212	0.000193212	0.00217571	2015	tags=23%, list=15%, signal=20%	Tcirg1/Slc4a8/Trim24/Trpv4/Vps54/Cxcl10/Plcg1/Coro1a/Mcoln1/Abcb7/Tmem178/Vps33a/Wnk1/Atp6v0d2/Anxa7/Atox1/Slc39a10/Grina/Tgfb1/Atp6v0a1/Slc12a2/Ptprc/Plcg2/P2ry2/Atp1b3/Cd40/Fgfr3/Dmd/Cln3/Hyal2/Tmtc2/Klhl3/Slc31a2/Slc24a5/Steap4/Cyb561/Plcb4/Ccr5/Mapk3/Slc12a6/Slc12a9/P2rx7/Stc1/Gstm7/Cdh23/Hfe/Bmp6/Ccl8/B2m/Slc8b1/Pik3cb/Slc12a7/Atp13a2/Itpr3/Ptpn6/Aplp2/Atp2b4/Chd7/Lyn/Gm6377/Cngb1/Plcb1/Tgm2…
GO:0045746	negative regulation of Notch signaling pathway	30	-0.676828	-1.92625	0.000194351	0.000194351	0.00218147	1412	tags=47%, list=10%, signal=42%	Arrdc1/Kctd10/Hey1/Gata2/Tcim/Arrb1/Lfng/Gdpd5/Notch4/Egfl7/Dll1/Tspan15/Dll4/Nrarp
GO:0008593	regulation of Notch signaling pathway	71	-0.549254	-1.85001	0.000194726	0.000194726	0.00218147	1705	tags=37%, list=12%, signal=32%	Prag1/Zmiz1/Arrdc1/Kctd10/Hey1/Gata2/Eya1/Adam10/Tcim/Tspan14/Notch1/Epn2/Nod2/Arrb1/Jag2/Lfng/Gdpd5/Notch4/Egfl7/Mfng/Dll1/Kit/Tspan15/Robo2/Dll4/Nrarp
GO:0042249	establishment of planar polarity of embryonic epithelium	16	0.796328	1.99773	0.000198124	0.000198124	0.00221385	807	tags=44%, list=6%, signal=41%	Sfrp1/Sfrp2/Cthrc1/Fzd2/Wnt5a/Fzd1/Ptk7
GO:0046903	secretion	713	-0.314881	-1.36779	0.000200154	0.000200154	0.00223082	2015	tags=25%, list=15%, signal=22%	Tcirg1/Myo1g/Rab11b/Slc4a8/Nr3c1/Trarg1/Scamp1/Trpv4/Il1rn/Rab11fip5/Rab8b/Ralb/Syn3/Grk2/Syn2/Tlr4/Tspan18/Trappc11/Rab27a/Coro1a/Stxbp5/Tnf/Abcc3/Pik3c2a/Htr7/Vamp3/Wnk1/Nckap1l/Nagpa/Bmp2/Atp9a/Anxa7/Psap/Dpysl2/Gnai2/Lgals9/P2ry12/Cplx2/Myo6/Slc25a22/Tgfb1/Sdcbp/Slc12a2/Gnaq/Lin7a/Pip5k1c/Ric1/Rgcc/Pink1/Klf7/Midn/Cd2ap/P2ry2/Cxcl12/Tnfrsf1b/Apln/Lat2/Git1/Map2k6/Bloc1s6/Gata2/Exoc8/Lrp5/Tlr2…
GO:0043542	endothelial cell migration	201	-0.415178	-1.61322	0.00020236	0.00020236	0.00224965	1890	tags=41%, list=14%, signal=36%	Gadd45a/Ptk2/Gata3/Rras/Krit1/Zc3h12a/Tgfbr3/Hdac7/Akt3/Adam17/Adam8/Plcg1/Coro1b/Patz1/Tnf/Lpxn/Pik3c2a/Sp1/Meox2/Sash1/Tgfb1/Nr2f2/Hdac5/Bmp4/Rgcc/Angpt2/Cxcl12/Cd40/Atoh8/Dab2ip/Hspb1/Cln3/Gata2/Jcad/Plekhg5/Pxn/Flt4/Efnb2/Col18a1/Glul/Stc1/Ptprm/Nrp1/Itgb2/Notch1/Ets1/Prkd2/Pik3cb/Ephb4/Alox12/Plpp3/Epha2/Atp2b4/Vegfc/Vash1/Sp100/Ceacam1/Pparg/Adamts9/Prcp/Pik3cg/Mef2c/Jup/Clec14a/Plxnd1/Cxcr…
GO:0001667	ameboidal-type cell migration	384	-0.355475	-1.47101	0.000205204	0.000205204	0.00227547	2373	tags=36%, list=17%, signal=31%	Gadd45a/Ptk2/Gata3/Mmp12/Rab11a/Rras/Phactr4/Iqsec1/Krit1/Zc3h12a/Adipor1/Macf1/Tgfbr3/Hdac7/Apc/Akt3/Adipor2/Adam17/Adam8/Ret/Mta2/Efnb1/Plec/Evl/Gna12/Plcg1/Sema4d/Coro1a/Coro1b/Patz1/Pdlim1/Tnf/Lpxn/Pik3c2a/Lrg1/Sp1/Wasf2/Meox2/Kank1/Rffl/Enpp2/Sash1/Tgfb1/Plcg2/Nr2f2/Hdac5/Bmp4/Rgcc/Angpt2/Rreb1/Cxcl12/Schip1/Actn4/Arhgdib/Cd40/Atoh8/Dab2ip/Hspb1/Sema4c/Cln3/Gata2/Jcad/Lrp5/Itgb4/Hyal2/Plekhg…
GO:0002579	positive regulation of antigen processing and presentation	11	-0.852683	-1.92897	0.000206191	0.000206191	0.0022806	1663	tags=73%, list=12%, signal=64%	Tap2/Nod1/Cd74/H2-Ab1/Nod2/Slc11a1/Trem2/Ccr7
GO:0030183	B cell differentiation	123	-0.465185	-1.69493	0.000206799	0.000206799	0.00228154	2233	tags=34%, list=16%, signal=29%	Stat5b/Lilrb4a/Gpr183/Hdac7/Fosl2/Ep300/Adam17/Tcirg1/Tpd52/Cd24a/Nckap1l/Cd27/Pou2f2/Ptprc/Plcg2/Hdac5/Nfam1/Il10/Il4i1/Jak3/Hmga1/Syk/Atp11c/Ahr/H2-Ab1/Spi1/Ptpn6/Irf8/Inpp5d/Ikzf1/Laptm5/Lfng/Mfng/Il2rg/Dll1/Hhex/Hdac9/Lyl1/Kit/Gimap1/Ighm/Igkc
GO:2000564	regulation of CD8-positive, alpha-beta T cell proliferation	14	-0.802942	-1.89767	0.000209068	0.000209068	0.00230075	1254	tags=71%, list=9%, signal=65%	H2-T22/Irf1/Sh3rf1/H2-K1/H2-D1/Vsir/H2-Q4/H2-Q7/H2-Q6/H2-T23
GO:0098655	monoatomic cation transmembrane transport	429	-0.348827	-1.45648	0.000214477	0.000214477	0.00235432	2015	tags=23%, list=15%, signal=20%	Tcirg1/Slc4a8/Trpv4/Cxcl10/Gpd1l/Fyn/Fxyd5/Pawr/Plcg1/Slc30a4/Coro1a/Mcoln1/Pik3c2a/Abcb7/Wnk1/Atp6v0d2/Atox1/Slc39a10/P2ry12/Stac/Tgfb1/Atp6v0a1/Slc12a2/Ptprc/Pde4b/Plcg2/Adrb2/Bmp4/Cacng1/Atp1b3/Hecw2/Dmd/Clcn3/Cnksr3/Slc31a2/Ikbkb/Tmem37/Slc24a5/Steap4/Slc6a6/Klhl24/Ehd3/Plcb4/Ccr5/Slc12a6/Orai1/P2rx7/Gstm7/Cacna1h/Kcnj2/Tcn2/Dysf/Ahr/Slc8b1/Mrln/Slc12a7/Itpr3/Agrn/Ptpn6/Atp2b4/Chd7/Slc46a3/Ly…
GO:0046488	phosphatidylinositol metabolic process	130	-0.452477	-1.64957	0.000216351	0.000216351	0.00236893	2955	tags=37%, list=21%, signal=29%	Pgap2/Inpp5b/Atg14/Pigt/Sacm1l/Pip4k2b/Pik3r3/Ip6k1/Smg1/Mtmr2/Mtmr1/Plcb2/Synj1/Inpp5a/Vac14/Mtmr3/Bpnt1/Becn1/Pigq/Plcg1/Inpp5f/Pik3c2a/Socs3/Mtmr12/Plcg2/Pip5k1c/Inpp5k/Cish/Mtmr10/Mtmr11/Ttc7b/Inpp1/Plcb4/Plek/Cdipt/Mtm1/Pik3cb/Itpkb/Inpp5d/Plcb1/Pik3cg/Efr3b/Inpp4b/Cds1/Pdgfb/Pitpnc1/Pik3c2b/Dgke
GO:0031343	positive regulation of cell killing	49	-0.587184	-1.8513	0.000217895	0.000217895	0.00237986	2233	tags=51%, list=16%, signal=43%	Stat5b/Stx7/H2-T22/Raet1e/Tap2/Ptprc/Stap1/Mill2/Nectin2/Ccr5/P2rx7/H2-K1/Hfe/Syk/B2m/H2-D1/Spi1/Tyrobp/H2-Q4/H2-Q7/Nos2/H2-T24/Gimap5/H2-Q6/H2-T23
GO:0048589	developmental growth	624	0.321368	1.38228	0.000218879	0.000218879	0.00238463	1622	tags=18%, list=12%, signal=17%	Dio3/Slit2/Rbp4/Sfrp1/Nrg1/Sfrp2/Comp/Lmx1b/Ptx3/Ccn4/Tnc/Fgf7/Serpine1/Bmpr1b/Thbs1/Dclk1/Kif26b/Ccn3/Ndn/Tnfaip6/Col27a1/Sema3c/Slit3/Crabp2/Stil/Tnn/Enpp1/S100b/En1/Mdk/Fn1/Wnt5a/Col6a1/Postn/Wnt11/Pkdcc/Bnc2/Evc/Slc1a2/Col14a1/Zfpm2/Col3a1/P2rx5/Ptn/Thbs3/Aspm/Igsf10/Kcnk2/Fdps/Bmpr1a/Ptprs/Tiam1/Anxa1/H19/Selenom/Ncam1/Sema6c/Lrp1/Serp1/Ncapg2/Fgfr1/Tnfrsf12a/Igf1/Fgf2/Dbn1/Cdk1/Meg3/Robo1/A…
GO:0018212	peptidyl-tyrosine modification	241	-0.398779	-1.57446	0.000221076	0.000221076	0.00240256	1945	tags=30%, list=14%, signal=26%	Tspan9/Fyn/Tlr4/Sema4d/Arhgef2/Il6ra/Tnf/Inpp5f/Srms/Aatk/Cbl/Cd24a/Insr/Ctnnd1/Enpp2/Socs3/Tgfb1/Ptprc/Plcg2/Parp9/Ptpn4/Cd40/Fgfr3/Csf3/Irf1/Gprc5b/Hyal2/Pxn/Jak3/Tpst2/Flt4/Dusp22/Mapk3/Il15/Nrp1/Itgb2/Syk/Pdgfd/Csf1r/Bmp6/Osm/Cd74/Yes1/Plpp3/Nod2/Agrn/Ptpn6/Aplp2/Lyn/Bst1/Gprc5a/Cd300a/Kitl/Ehd4/Flt1/Tek/Pecam1/Cav2/Pdgfb/Parp14/Cd36/Abi3/Cav1/Vtn/Kit/Hck/Ntf3/Hcls1/Trem2/Kdr/Efna1/Samsn1/Ighm
GO:0035023	regulation of Rho protein signal transduction	76	-0.529705	-1.79843	0.000222517	0.000222517	0.00241206	1979	tags=39%, list=14%, signal=34%	Ophn1/Sema4d/Arhgef2/P2ry10b/Prag1/Kank1/Cdc42se2/Heg1/Arhgdib/Tnfaip1/Kctd10/Ripor1/Lpar4/Gpr65/Nrp1/Arrb1/Itga3/Eps8l2/Lpar6/Rasip1/Tek/Stard8/Apoe/Abca1/Arhgef3/Mcf2l/Adgrg1/F2rl3/Gpr4/F11r
GO:0032613	interleukin-10 production	48	-0.604523	-1.90037	0.000223058	0.000223058	0.00241206	2180	tags=48%, list=16%, signal=40%	Lilrb4a/Sash3/Tlr4/Tusc2/Lgals9/Plcg2/Il20rb/Tlr2/Jak3/Cd83/Syk/Fcer1g/Nod2/Tyrobp/Trib2/Isg15/Fcgr2b/Cd84/Vsir/Dll1/Tnfrsf21/Trem2/Cd274
GO:0019058	viral life cycle	206	-0.402069	-1.5636	0.000228312	0.000228312	0.00246277	2074	tags=29%, list=15%, signal=25%	Eif2ak2/Trim11/Tasor/Grk2/Chmp1b/Ciita/Tnf/Mid2/Insr/Chmp2b/Ctsb/Ifi206/Apobec3/Ifitm1/Inpp5k/N4bp1/Oasl1/Trim12a/Gm11772/Adar/Ifitm3/Ifi207/Stom/Mvb12b/Adarb1/Rnasel/Ifih1/Mndal/Trim5/Hyal2/Bst2/Trim56/Ly6e/Trim12c/Trim25/Nectin2/Oas2/Nrp1/Trim30d/Notch1/Ccl8/Cd74/Ifi209/Znfx1/Trim21/Oas1a/Trim34a/Oasl2/Ifi203/Isg15/Trim6/Trim30a/Cav2/Apoe/Cav1/Ch25h/Nr5a2/Ifi213/Rsad2/Ifi208
GO:0002428	antigen processing and presentation of peptide antigen via MHC class Ib	17	-0.78387	-1.97049	0.000240382	0.000240382	0.00258657	2020	tags=76%, list=15%, signal=65%	H2-T22/Raet1e/Tap2/Mill2/H2-K1/Hfe/B2m/H2-D1/H2-Q4/H2-Q7/H2-T24/H2-Q6/H2-T23
GO:0006575	cellular modified amino acid metabolic process	137	0.45663	1.68278	0.000249921	0.000249921	0.00267368	2275	tags=31%, list=17%, signal=26%	Dio3/P4ha3/Ggt7/Plod2/Dpep1/Ctsk/P4ha2/Ass1/Slc1a2/Aldh1l2/Mthfd2/Gstm5/P4ha1/Sardh/Serinc2/Dhfr/P4hb/Gsto1/Egln3/Crtap/Mthfd1l/Tyms/Ggt5/Prdx4/Atic/Plod3/Mthfd1/Gstz1/Ahcy/Slc16a2/Cpt2/Ggact/Mgst1/Gstm2/Mfsd2a/Ckb/Shmt2/Gart/Gstp1/Pla2g15/Fpgs/Pemt/Duoxa1
GO:0050730	regulation of peptidyl-tyrosine phosphorylation	198	-0.408153	-1.58372	0.000249921	0.000249921	0.00267368	1945	tags=30%, list=14%, signal=26%	Tspan9/Fyn/Tlr4/Sema4d/Arhgef2/Il6ra/Tnf/Inpp5f/Cbl/Cd24a/Ctnnd1/Enpp2/Socs3/Tgfb1/Ptprc/Plcg2/Parp9/Cd40/Fgfr3/Csf3/Irf1/Gprc5b/Hyal2/Dusp22/Il15/Nrp1/Itgb2/Syk/Pdgfd/Csf1r/Bmp6/Osm/Cd74/Yes1/Plpp3/Nod2/Agrn/Ptpn6/Aplp2/Lyn/Bst1/Gprc5a/Cd300a/Kitl/Ehd4/Pecam1/Cav2/Pdgfb/Parp14/Cd36/Abi3/Cav1/Vtn/Kit/Ntf3/Hcls1/Trem2/Efna1/Samsn1/Ighm
GO:0035567	non-canonical Wnt signaling pathway	49	0.594652	1.89927	0.000250319	0.000250319	0.00267368	1106	tags=33%, list=8%, signal=30%	Sfrp1/Sfrp2/Cthrc1/Rspo3/Fzd2/Wnt5a/Wnt11/Ror2/Tiam1/Dact1/Fzd1/Fzd5/Ptk7/Fzd3/Nkd1/Ryk
GO:0001570	vasculogenesis	80	-0.508077	-1.7379	0.000253889	0.000253889	0.00270519	1567	tags=32%, list=11%, signal=29%	Tgfb1/Zmiz1/Heg1/Ctnnb1/Ackr3/Hey1/Fzd4/Eng/Nrp1/Notch1/Epha2/Sox17/Ceacam1/Cd34/Ramp2/Fgf9/Rasip1/Tek/Egfl7/Hhex/Tie1/Cav1/Kdr/Sox18/Xdh/Aplnr
GO:0034101	erythrocyte homeostasis	144	-0.452781	-1.68312	0.000256017	0.000256017	0.00271458	2854	tags=37%, list=21%, signal=29%	Nemp1/Hba-a2/Cebpg/Chmp5/Zfp36/Alas1/Smad5/Ireb2/Gata3/Nfe2l1/Hba-a1/Stat5b/Cflar/Jak2/Tgfbr3/Dnase2a/Tmod3/Ptbp3/Kmt2e/Fam210b/Sp1/Cd24a/Nckap1l/Cdk6/Klf13/Bmp4/Adar/Gata2/Stat1/Zfpm1/Hmga1/Hoxa5/Ampd3/Rb1/Ets1/B2m/Lmo2/Rac2/Spi1/Sh2b3/Lyn/Inpp5d/Isg15/Ikzf1/Plcb1/Adgrf5/Exoc6/Hoxb6/Kcnq1/Kit/Epas1/Tal1/Hcls1
GO:0098771	inorganic ion homeostasis	377	-0.356647	-1.47036	0.000256017	0.000256017	0.00271458	2015	tags=24%, list=15%, signal=21%	Tcirg1/Trim24/Trpv4/Vps54/Cxcl10/Plcg1/Coro1a/Mcoln1/Abcb7/Tmem178/Wnk1/Anxa7/Atox1/Slc39a10/Grina/Tgfb1/Slc12a2/Ptprc/Plcg2/P2ry2/Atp1b3/Cd40/Fgfr3/Dmd/Cln3/Hyal2/Tmtc2/Klhl3/Slc31a2/Enpp3/Slc24a5/Steap4/Cyb561/Plcb4/Ccr5/Slc12a6/Slc12a9/P2rx7/Stc1/Gstm7/Cdh23/Hfe/Bmp6/Ccl8/B2m/Slc8b1/Pik3cb/Slc12a7/Atp13a2/Itpr3/Ptpn6/Aplp2/Atp2b4/Chd7/Lyn/Cngb1/Plcb1/Tgm2/Tmc8/Mtss1/Inpp4b/Slc30a1/Cav2/Prnd/Pr…
GO:0006520	amino acid metabolic process	185	0.422609	1.60978	0.000257062	0.000257062	0.00271905	2256	tags=26%, list=16%, signal=22%	Bcat1/Slc1a3/P4ha3/Phgdh/Ddah1/Azin2/Plod2/Gfpt2/Dpep1/P4ha2/Ass1/Pycr1/P4ha1/Gcat/Sdsl/Sardh/Aldh18a1/Dhfr/P4hb/Abat/Aldh1a1/Gfpt1/Egln3/Crtap/Gls2/Oat/Cad/Ggt5/Prdx4/Nox4/Plod3/Psat1/Mri1/Mthfd1/Gcsh/Gstz1/Ahcy/Ddc/Slc16a2/Gpt2/Carnmt1/Shmt2/Mtap/Acat1/Gart/Fpgs/Gmps/Pemt/Comt
GO:0097028	dendritic cell differentiation	32	-0.656408	-1.8956	0.000268418	0.000268418	0.00283229	819	tags=34%, list=6%, signal=32%	Batf3/Spi1/Irf8/Pirb/Lyn/Zbtb46/Gimap5/Slamf9/Trem2/Ccr7/Batf2
GO:0001906	cell killing	139	-0.455634	-1.68914	0.000274615	0.000274615	0.00289069	2263	tags=42%, list=16%, signal=36%	Stxbp2/Stat5b/Stx7/Lgals3/Cd59a/H2-T22/Cxcl10/Rab27a/Coro1a/Raet1e/Nckap1l/Tap2/Tusc2/Lgals9/Tgfb1/Tap1/Ptprc/Cr1l/Stap1/Cxcl12/Mill2/Nectin2/Ccr5/P2rx7/H2-K1/Irgm2/Hfe/Syk/Ccl8/B2m/H2-D1/Fcgr3/Spi1/Il7r/Ptpn6/Tyrobp/Igtp/Clec2d/Pglyrp1/Ceacam1/Fcgr2b/H2-Q4/Igf2/Cx3cr1/Lyz2/Gbp2/H2-Q7/Nos2/H2-T24/Fcgr1/Gbp3/Gimap5/Ncf1/Gbp5/H2-Q6/Gbp7/Pik3r6/H2-T23/Fcgr4
GO:0002718	regulation of cytokine production involved in immune response	107	-0.463811	-1.66182	0.000277772	0.000277772	0.00291687	2369	tags=43%, list=17%, signal=36%	Casp1/Gata3/Casp4/Lilrb4a/Sash3/H2-T22/Tlr7/Tlr4/Tnf/Nlrp3/Irf5/Tgfb1/Plcg2/Nod1/Il10/Tnfrsf1b/Gprc5b/Tlr2/Bst2/Jak3/Sema7a/P2rx7/H2-K1/Hfe/Syk/B2m/H2-D1/Cd74/Fcer1g/Nod2/Laptm5/Il1b/Trim6/Tek/Vsir/H2-Q4/Nepn/Tlr3/H2-Q7/Ccr2/Cd36/Kit/Gimap5/H2-Q6/H2-T23/Rsad2
GO:0002716	negative regulation of natural killer cell mediated immunity	21	-0.73461	-1.94333	0.000281544	0.000281544	0.0029423	2020	tags=67%, list=15%, signal=57%	H2-T22/Tap2/Lgals9/Tgfb1/Tap1/H2-K1/H2-D1/Clec2d/Ceacam1/H2-Q4/Igf2/H2-Q7/H2-Q6/H2-T23
GO:0045953	negative regulation of natural killer cell mediated cytotoxicity	21	-0.73461	-1.94333	0.000281544	0.000281544	0.0029423	2020	tags=67%, list=15%, signal=57%	H2-T22/Tap2/Lgals9/Tgfb1/Tap1/H2-K1/H2-D1/Clec2d/Ceacam1/H2-Q4/Igf2/H2-Q7/H2-Q6/H2-T23
GO:0007264	small GTPase-mediated signal transduction	381	-0.353663	-1.45868	0.000294115	0.000294115	0.0030608	1932	tags=27%, list=14%, signal=23%	Rit1/Arhgap19/Ralb/Srgap1/Gna12/Sema4d/Arhgef2/Rapgef2/Chml/Cbl/P2ry10b/Wasf2/Prag1/Kank1/Arhgap30/Sos2/Nras/Arhgef12/Iqsec3/Sdcbp/Lipa/Cdc42se2/Heg1/Cd2ap/Arhgdib/Celsr1/Tnfaip1/Kctd10/Dgkz/Dab2ip/Rasgrp4/Git1/Ralgapa1/Rasgef1b/Ripor1/Plekhg5/Git2/Sipa1/Rhobtb1/Rapgef1/Chn1/Lpar4/Dock6/Cdc42ep1/Rasa4/Cdc42ep3/Gpr65/Dock4/Nrp1/Arhgap31/Dennd3/Dock2/Arhgef7/Notch1/Ralgapa2/Cdc42ep2/Rgl2/Pik3cb/Rac…
GO:0050867	positive regulation of cell activation	302	-0.3701	-1.48891	0.000294288	0.000294288	0.0030608	2182	tags=33%, list=16%, signal=28%	Il2ra/Rhoh/Gata3/Crlf2/Lck/Stat5b/H2-Ob/Lilrb4a/Gpr183/Tyk2/Jak2/Runx3/Dock8/Cd59a/Sash3/Adam8/Nck2/Efnb1/H2-T22/Tlr4/Coro1a/Tnf/Cd24a/H2-Eb1/Nckap1l/Slc39a10/Cd27/Lgals9/Il16/Nck1/Nlrp3/Tgfb1/Zmiz1/Pear1/Ptprc/Cd86/Stap1/Il10/Plpp6/Cd40/H2-DMa/Kmt5b/Bloc1s6/Irf1/Il4i1/Jak3/Nectin2/Efnb2/Cd83/Plek/Nfkbid/H2-K1/H2-Aa/Tafa3/Il15/Rps6ka1/Syk/Csf1r/Atp11c/B2m/H2-D1/Cd74/Tnfsf13/H2-Ab1/Ephb4/Itpkb/Aif…
GO:0045621	positive regulation of lymphocyte differentiation	116	-0.476268	-1.7089	0.000297096	0.000297096	0.00308265	2545	tags=38%, list=18%, signal=31%	Rara/Arid1a/Smarcd1/Il2ra/Rhoh/Gata3/Lck/Stat5b/Lilrb4a/Runx3/Sash3/Adam8/Nckap1l/Cd27/Lgals9/Nlrp3/Tgfb1/Zmiz1/Ptprc/Il10/H2-DMa/Irf1/Il4i1/Cd83/Nfkbid/H2-Aa/Il15/Syk/Atp11c/Cd74/Itpkb/Spi1/Il7r/Inpp5d/Flt3l/Sox13/Hlx/Vsir/Il2rg/Ccr2/Gimap5/Pik3r6/Zbtb16/Ccr7
GO:0042116	macrophage activation	85	-0.501829	-1.73752	0.000301871	0.000301871	0.00312476	1887	tags=41%, list=14%, signal=36%	Tlr4/Nampt/Tnf/Tlr1/Sbno2/Lgals9/Plcg2/Stap1/Il10/Gpr137b/Ifngr1/Tlr2/C5ar1/Nmi/Tafa3/Clu/Syk/Csf1r/Dysf/Ifi35/Myo18a/Tmem229b/Aif1/Tyrobp/Pparg/C1qa/Cd84/Adgrf5/Cx3cr1/Tlr3/Irgm1/Slc11a1/Cd200/Trem2/Kcnj8
GO:0030278	regulation of ossification	109	0.471509	1.69124	0.000303378	0.000303378	0.00313291	1297	tags=30%, list=9%, signal=28%	Vdr/Sfrp1/Comp/Twist1/Osr1/Gfra4/Fbn2/Bmpr1b/Tmem119/P3h1/Scube2/Enpp1/Mdk/Wnt5a/Pkdcc/Tent5a/Ptn/Mgp/Ccdc134/Ltbp3/Bmpr1a/Slc8a1/Creb3l1/Osr2/Six2/Csf1/Tmem53/Sgms2/Sox9/Egr2/Gpm6b/Mia3/Runx2
GO:0007292	female gamete generation	114	0.472075	1.6977	0.000305875	0.000305875	0.00315123	1685	tags=25%, list=12%, signal=23%	Rbm46/Ptx3/Bmpr1b/Cyp51/Tnfaip6/Pla2g4a/Mcm8/Mdk/4930447C04Rik/Ttk/Inhba/Ptn/Aspm/Top2a/M1ap/Trip13/Igf1/Plk1/Mastl/Gas2/Ndc80/Spire1/Cenpe/Alms1/Brca2/Fosl1/Fbxo5/Src/Ncaph
GO:0030101	natural killer cell activation	69	-0.540847	-1.81975	0.000310083	0.000310083	0.00318705	2233	tags=39%, list=16%, signal=33%	Stat5b/Lilrb4a/Tyk2/Jak2/H2-T22/Rab27a/Coro1a/Tusc2/Lgals9/Ptprc/Slamf7/Bloc1s6/Irf1/Mertk/H2-K1/Il15/H2-D1/Tyrobp/Pglyrp1/Flt3l/Ikzf1/H2-Q4/H2-Q7/Prdm1/H2-Q6/H2-T23/Fcgr4
GO:0055082	intracellular chemical homeostasis	521	-0.331471	-1.40426	0.000312641	0.000312641	0.0032048	2015	tags=21%, list=15%, signal=19%	Tcirg1/Rab11b/Slc4a8/Trpv4/Vps54/Cxcl10/Rab11fip5/Grk2/Plcg1/Coro1a/Mcoln1/Abcb7/Tmem178/Vps33a/Wnk1/Atp6v0d2/Anxa7/Atox1/Slc39a10/Grina/Lrrc8d/Tgfb1/Atp6v0a1/Slc12a2/Ptprc/Plcg2/Klf7/P2ry2/Atp1b3/Cd40/Bloc1s6/Dmd/Cln3/Lrp5/Slc31a2/Ucp2/Slc24a5/Steap4/Cyb561/Plcb4/Ccr5/Mapk3/Slc12a6/P2rx7/Glul/Stc1/Gstm7/Cdh23/Acacb/Hfe/Pde1c/Bmp6/Ccl8/B2m/Pim3/Slc8b1/Pik3cb/Slc12a7/Atp13a2/Itpr3/Ptpn6/Aplp2/Atp2…
GO:0098662	inorganic cation transmembrane transport	423	-0.346969	-1.44862	0.00031328	0.00031328	0.0032048	2015	tags=23%, list=15%, signal=20%	Tcirg1/Slc4a8/Trpv4/Cxcl10/Gpd1l/Fyn/Fxyd5/Pawr/Plcg1/Slc30a4/Coro1a/Mcoln1/Pik3c2a/Abcb7/Wnk1/Atp6v0d2/Atox1/Slc39a10/P2ry12/Stac/Tgfb1/Atp6v0a1/Slc12a2/Ptprc/Pde4b/Plcg2/Adrb2/Bmp4/Cacng1/Atp1b3/Hecw2/Dmd/Clcn3/Cnksr3/Slc31a2/Tmem37/Slc24a5/Steap4/Slc6a6/Klhl24/Ehd3/Plcb4/Ccr5/Slc12a6/Orai1/P2rx7/Gstm7/Cacna1h/Kcnj2/Tcn2/Dysf/Ahr/Slc8b1/Mrln/Slc12a7/Itpr3/Agrn/Ptpn6/Atp2b4/Chd7/Slc46a3/Lyn/Plcb…
GO:0046633	alpha-beta T cell proliferation	46	-0.599042	-1.86296	0.000315819	0.000315819	0.0032232	2180	tags=50%, list=16%, signal=42%	Il2ra/Lilrb4a/Tyk2/Jak2/H2-T22/Cd24a/Lgals9/Ptprc/Irf1/Sh3rf1/H2-K1/Il15/Dock2/Syk/H2-D1/Vsir/H2-Q4/H2-Q7/Ccr2/Irgm1/H2-Q6/H2-T23/Cd274
GO:0042267	natural killer cell mediated cytotoxicity	52	-0.569227	-1.81274	0.000322673	0.000322673	0.00328546	2020	tags=40%, list=15%, signal=35%	H2-T22/Rab27a/Coro1a/Tap2/Lgals9/Tgfb1/Tap1/Nectin2/H2-K1/H2-D1/Ptpn6/Clec2d/Ceacam1/H2-Q4/Igf2/H2-Q7/Gimap5/H2-Q6/Pik3r6/H2-T23/Fcgr4
GO:0002367	cytokine production involved in immune response	121	-0.465675	-1.6847	0.000323901	0.000323901	0.00329027	2369	tags=41%, list=17%, signal=35%	Casp1/Gata3/Crlf2/Casp4/Lilrb4a/Fosl2/Sash3/H2-T22/Tlr7/Tlr4/Tnf/Nlrp3/Irf5/Tgfb1/Plcg2/Nod1/Il10/Tnfrsf1b/Gprc5b/Tlr2/Bst2/Jak3/Sema7a/P2rx7/H2-K1/Hfe/Syk/B2m/H2-D1/Cd74/Fcer1g/Nod2/Laptm5/Il1b/Trim6/Tek/Vsir/H2-Q4/Nepn/Tlr3/H2-Q7/Ccr2/Cd36/Slc11a1/Kit/Gimap5/H2-Q6/H2-T23/Slamf9/Rsad2
GO:0034762	regulation of transmembrane transport	344	-0.357269	-1.45987	0.000327162	0.000327162	0.00331566	2015	tags=24%, list=15%, signal=21%	Tcirg1/Acsl5/Crebl2/Cxcl10/Gpd1l/Fyn/Fxyd5/Grk2/Plcg1/Coro1a/Tnf/Pik3c2a/Wnk1/Insr/Oaz2/Stac/Tgfb1/Pde4b/Plcg2/Pid1/Adrb2/Bmp4/Cacng1/Inpp5k/Rgs2/Atp1b3/Mef2a/Hecw2/Stom/Sorbs1/Dmd/Cnksr3/Rnasel/Slc31a2/Ikbkb/Klhl24/Ehd3/P2rx7/Ace/Gstm7/Kcnj2/Dysf/Ahr/Mrln/Yes1/Abcb1b/Agrn/Ptpn6/Atp2b4/Chd7/Lyn/Slc43a2/Il1b/Plcb1/Pik3cg/Mef2c/Chp2/Ctss/Slc30a1/Prkcb/Rapgef3/Kcnq1/Rasgrf2/Cav1/Gimap5/Shank3/Atp1b2…
GO:1903319	positive regulation of protein maturation	21	0.740633	1.98921	0.000327982	0.000327982	0.00331627	1744	tags=52%, list=13%, signal=46%	Tfr2/Nkd2/Spon1/Ccbe1/Bag2/Eno1/Gsn/Timm23/Src/Eno1b/Mmp14
GO:0050671	positive regulation of lymphocyte proliferation	114	-0.470805	-1.68971	0.000332074	0.000332074	0.00334987	2233	tags=38%, list=16%, signal=32%	Stat5b/Gpr183/Tyk2/Jak2/Cd59a/Sash3/Nck2/Efnb1/H2-T22/Tlr4/Coro1a/Cd24a/Nckap1l/Slc39a10/Nck1/Ptprc/Cd86/Cd40/Jak3/H2-K1/Il15/Syk/Csf1r/H2-D1/Cd74/Aif1/Flt3l/Bst1/Il1b/Mef2c/Kitl/H2-Q4/Igf2/H2-Q7/Ccr2/Irgm1/H2-Q6/H2-T23/Icosl/Cd38/Cd274/Ighm/Ccr7
GO:0035107	appendage morphogenesis	134	0.445687	1.64272	0.000335981	0.000335981	0.00336754	1837	tags=32%, list=13%, signal=28%	Sfrp2/Prrx2/Aldh1a2/Lmx1b/Twist1/Osr1/Fbn2/Shox2/Sema3c/Crabp2/Enpp1/En1/Pitx1/Wnt5a/Col6a1/Pkdcc/Pcsk5/Ror2/Alx4/Col3a1/Bmpr1a/Prrx1/Wnt9a/Hoxc10/Fgfr1/Aff3/Osr2/Gli3/Sox9/Rab23/Tmem107/Lnpk/Asph/Tgfb2/Runx2/Gli2/Ext1/Gas1/Hoxa10/Tmem231/Rspo2/B9d1/Fmn1
GO:0035108	limb morphogenesis	134	0.445687	1.64272	0.000335981	0.000335981	0.00336754	1837	tags=32%, list=13%, signal=28%	Sfrp2/Prrx2/Aldh1a2/Lmx1b/Twist1/Osr1/Fbn2/Shox2/Sema3c/Crabp2/Enpp1/En1/Pitx1/Wnt5a/Col6a1/Pkdcc/Pcsk5/Ror2/Alx4/Col3a1/Bmpr1a/Prrx1/Wnt9a/Hoxc10/Fgfr1/Aff3/Osr2/Gli3/Sox9/Rab23/Tmem107/Lnpk/Asph/Tgfb2/Runx2/Gli2/Ext1/Gas1/Hoxa10/Tmem231/Rspo2/B9d1/Fmn1
GO:0006909	phagocytosis	182	-0.416975	-1.6044	0.000336144	0.000336144	0.00336754	1887	tags=31%, list=14%, signal=27%	Tlr4/Rab27a/Coro1a/Nckap1l/Tusc2/Tgfb1/Pear1/Ptprc/Plcg2/Pip5k1c/Cdc42se2/Stap1/P2ry6/Clcn3/Cln3/Gata2/Tlr2/Mertk/Rapgef1/Anxa11/P2rx7/Msr1/Il15/Ncf2/Itgb2/Dock2/Syk/Dysf/Abca7/Myo18a/Fcgr3/Aif1/Fcer1g/Nod2/Irf8/Tyrobp/Syt7/Elmo1/Pparg/Cd300a/Tgm2/Lepr/Fcgr2b/Pecam1/Pld4/Abca1/Itga2/Il2rg/Ccr2/Cd36/Fcgr1/Slc11a1/Hck/Trem2/Scarb1/Arhgap25/Ccr7
GO:1901605	alpha-amino acid metabolic process	140	0.445257	1.64335	0.000339307	0.000339307	0.0033841	2256	tags=30%, list=16%, signal=25%	Bcat1/P4ha3/Phgdh/Ddah1/Azin2/Plod2/Gfpt2/Dpep1/P4ha2/Ass1/Pycr1/P4ha1/Gcat/Sdsl/Sardh/Aldh18a1/Dhfr/P4hb/Gfpt1/Egln3/Crtap/Gls2/Oat/Cad/Prdx4/Nox4/Plod3/Psat1/Mri1/Mthfd1/Gcsh/Gstz1/Ahcy/Gpt2/Shmt2/Mtap/Acat1/Gart/Fpgs/Gmps/Pemt/Comt
GO:0071402	cellular response to lipoprotein particle stimulus	28	-0.681912	-1.91763	0.00033935	0.00033935	0.0033841	2077	tags=57%, list=15%, signal=49%	Adam17/Tlr4/Tgfb1/Cd9/Lpl/Mylip/Itgb2/Syk/Cd68/Fcer1g/Pparg/Apoe/Abcg1/Cd36/Cdh13/Trem2
GO:0046394	carboxylic acid biosynthetic process	199	0.406973	1.5588	0.00034436	0.00034436	0.00342622	2170	tags=31%, list=16%, signal=27%	Bcat1/Aldh1a3/Aldh1a2/Slc1a3/Rbp1/Phgdh/Ptges/Ptgis/Plod2/Brca1/Pla2g4a/Ass1/Avpr1a/Sphk1/Pycr1/Ptgs2/Anxa1/Sdsl/Mif/Aldh18a1/Ugdh/Hacd1/Dhfr/Abat/Dse/Fasn/Gsto1/Aldh1a1/Cyp7b1/Scd1/Fads1/Gls2/Fads2/Nanp/Chst12/Mthfd1l/Star/Elovl6/Cad/Pkm/Ggt5/Hacd2/Tecr/Plod3/Psat1/Fads3/Mri1/Mthfd1/Ldha/Per2/Mlycd/Acsl3/Pecr/Elovl4/Amacr/Acaca/Shmt2/Mtap/Gstp1/Lpgat1/Uros/Mecr
GO:0002476	antigen processing and presentation of endogenous peptide antigen via MHC class Ib	16	-0.7788	-1.91318	0.000354476	0.000354476	0.00351084	2020	tags=75%, list=15%, signal=64%	H2-T22/Raet1e/Tap2/Mill2/H2-K1/Hfe/H2-D1/H2-Q4/H2-Q7/H2-T24/H2-Q6/H2-T23
GO:0002484	antigen processing and presentation of endogenous peptide antigen via MHC class I via ER pathway	16	-0.7788	-1.91318	0.000354476	0.000354476	0.00351084	2020	tags=75%, list=15%, signal=64%	H2-T22/Raet1e/Tap2/Mill2/H2-K1/Hfe/H2-D1/H2-Q4/H2-Q7/H2-T24/H2-Q6/H2-T23
GO:0019934	cGMP-mediated signaling	23	-0.712881	-1.9008	0.00036655	0.00036655	0.00362219	369	tags=39%, list=3%, signal=38%	Apoe/Nos2/Pde2a/Cd36/Gucy1b1/Npr1/Ednrb/Aqp1/Gucy1a1
GO:0070588	calcium ion transmembrane transport	217	-0.389541	-1.51507	0.000372785	0.000372785	0.00367547	1963	tags=24%, list=14%, signal=21%	Trpv4/Cxcl10/Fyn/Pawr/Plcg1/Coro1a/Mcoln1/P2ry12/Stac/Tgfb1/Ptprc/Pde4b/Plcg2/Adrb2/Bmp4/Cacng1/Dmd/Tmem37/Slc24a5/Ehd3/Plcb4/Ccr5/Orai1/P2rx7/Gstm7/Cacna1h/Dysf/Ahr/Slc8b1/Mrln/Itpr3/Ptpn6/Atp2b4/Chd7/Lyn/Plcb1/Pik3cg/Rapgef3/Cav1/Gimap5/F2rl3/Atp2a3/Hrc/Tspan13/Trpm3/Clec4b1/Ednrb/Aplnr/Trpc3/Atp1a2/Akap5/Casq2/Kcnj8
GO:1902969	mitotic DNA replication	16	0.784552	1.96819	0.000375187	0.000375187	0.0036908	2261	tags=81%, list=16%, signal=68%	Rad51/Cdc45/Fgfr1/Gins3/Mcm4/Tk1/Lig1/Brca2/Mcm2/Mcm3/Mcm6/Gins1/Pola1
GO:0061430	bone trabecula morphogenesis	14	0.792577	1.92139	0.000376734	0.000376734	0.00369767	974	tags=57%, list=7%, signal=53%	Vdr/Sfrp1/Fbn2/Enpp1/Col1a1/Thbs3/Mmp2/Vegfa
GO:0032814	regulation of natural killer cell activation	42	-0.621494	-1.88738	0.000381194	0.000381194	0.00373304	2233	tags=48%, list=16%, signal=40%	Stat5b/Lilrb4a/Tyk2/Jak2/H2-T22/Lgals9/Slamf7/Bloc1s6/Irf1/H2-K1/Il15/H2-D1/Tyrobp/Pglyrp1/Flt3l/H2-Q4/H2-Q7/Prdm1/H2-Q6/H2-T23
GO:0043410	positive regulation of MAPK cascade	392	-0.350345	-1.44946	0.000382116	0.000382116	0.00373368	1845	tags=28%, list=13%, signal=25%	Rapgef2/Il6ra/Tnf/Pde8a/Cd24a/Insr/Bmp2/Psap/Gnai2/Cd27/Sash1/Ccl12/Ccl3/Tgfb1/Ptprc/Plcg2/Nod1/Sorbs3/Adrb2/Bmp4/Mink1/Ctnnb1/Cxcl12/Trim12a/Ackr3/Cd40/Fgfr3/P2ry6/Dab2ip/Map2k6/Sema4c/Jcad/Trim5/Tlr2/C5ar1/Trim12c/Gdf15/Rassf2/Rapgef1/Taok2/Flt4/Sema7a/Fgd2/Sh3rf1/Fzd4/Dusp22/Mapk3/P2rx7/Nrp1/Ccl9/Syk/Pdgfd/Trim30d/Csf1r/Notch1/Ccl8/Osm/Itga1/Cd74/Tnfrsf11a/Abca7/Prkd2/Spi1/Nod2/Naip2/Arrb1/Igf…
GO:0002220	innate immune response activating cell surface receptor signaling pathway	70	-0.535841	-1.8038	0.000384109	0.000384109	0.00374476	3911	tags=54%, list=28%, signal=39%	Ripk2/Scimp/Klrd1/Irf3/Ticam2/Oas1c/Pik3r1/Peli1/Rela/Nr1h3/Appl2/Traf6/Ptpn22/Tirap/Tnip2/Nr1d1/Clec4n/Irak2/Znrf1/Tbk1/Tlr4/Tlr1/Ly96/Plcg2/Tnip3/Dab2ip/Tlr2/Nmi/Cd14/Syk/Ifi35/Nod2/Oas1a/Pik3ap1/Tyrobp/Lyn/Nepn/Trem2
GO:0006911	phagocytosis, engulfment	46	-0.594479	-1.84877	0.000385516	0.000385516	0.00375008	1711	tags=46%, list=12%, signal=40%	Nckap1l/Plcg2/Stap1/Clcn3/Gata2/Msr1/Itgb2/Abca7/Fcgr3/Aif1/Fcer1g/Elmo1/Pparg/Cd300a/Fcgr2b/Abca1/Itga2/Cd36/Fcgr1/Trem2/Arhgap25
GO:0043122	regulation of canonical NF-kappaB signal transduction	194	-0.414384	-1.61042	0.000387104	0.000387104	0.00375714	3204	tags=38%, list=23%, signal=29%	Lamtor5/Traf3ip2/Card6/Alpk1/Traf6/Il1a/Esr1/Eda2r/Trim8/Arrb2/Card11/Nfat5/Tirap/Tnip2/Edn1/Nfkbil1/Zc3hav1/Nr1d1/Tle1/Terf2ip/Clec4n/Rbck1/Casp1/Rhoh/Rnf31/Zc3h12a/Irak4/Tmem106a/Lilrb4a/Tgfbr3/Casp8/Tlr4/Tank/Tnf/Mid2/Tgfb1/Plcg2/Nod1/Tnip3/Pink1/Trim12a/Dab2ip/Hspb1/Trim5/Gprc5b/Stat1/Tifa/Ikbkb/Trim12c/Trim25/Uaca/Nfkbid/Irgm2/Trim30d/Traf1/Cd74/Trim21/Nod2/Trim34a/Igtp/Il1b/Tgm2/Trim6/Trim3…
GO:0070192	chromosome organization involved in meiotic cell cycle	40	0.612662	1.88821	0.00038821	0.00038821	0.00375951	2913	tags=52%, list=21%, signal=42%	4930447C04Rik/Ccne2/Ccne1/Rad51/Trip13/Brip1/Psmc3ip/Smc2/Ndc1/Fancd2/Ncaph/Smc4/Syce2/Atm/Ncapd3/Zcwpw1/Rad50/Haspin/Mlh1/Syde1/Cpeb1
GO:0043270	positive regulation of monoatomic ion transport	159	-0.41729	-1.57907	0.000390288	0.000390288	0.00377125	1602	tags=25%, list=12%, signal=22%	P2ry12/Stac/Plcg2/Adrb2/Bmp4/Cxcl12/Atp1b3/Mylk/Dmd/Cnksr3/Jak3/Ikbkb/Ehd3/Orai1/P2rx7/Stc1/Gstm7/Kcnj2/Abcb1b/Plcb1/Chp2/Cxcr4/Ctss/Rapgef3/Pdgfb/Kcnq1/Cav1/Gimap5/Shank3/Atp1b2/F2rl3/Trem2/Lrrc55/Clec4b1/Aplnr/Edn3/Trpc3/Abcb1a/Akap5/Tesc
GO:0061458	reproductive system development	217	0.391366	1.52791	0.00039213	0.00039213	0.00378067	1564	tags=23%, list=11%, signal=21%	Rbp4/Sfrp1/Fst/Sfrp2/Serpinf1/Ptx3/Osr1/Tnc/Fgf7/Serpine1/Bmpr1b/Tnfaip6/Pla2g4a/Tyro3/Nupr1/Runx1/Wnt5a/Col6a1/Ror2/Inhba/Zfpm2/Rhobtb3/Aspm/Angpt1/Igf1/Brip1/Mmp2/Sulf1/Rnase10/C3/Ptprn/Fancf/Vegfa/Cyp7b1/Sox9/Serpine2/Pdgfra/Itgav/Gas2/Cd44/Fanca/Axl/Tgfb2/Dhcr24/Nup107/Brca2/Gli2/Prdx4/Bmp5/Src
GO:0099536	synaptic signaling	511	-0.328889	-1.39556	0.000393416	0.000393416	0.0037824	2633	tags=30%, list=19%, signal=25%	Stxbp1/Stim1/Creb1/Atp1a3/Rap1a/Mtmr2/Celf4/Met/Rara/Fabp5/Itpr1/Fbxl20/Napb/Hap1/Rhot1/Synj1/Ptk2/Npff/Lin7c/Rab11a/Pvalb/Stxbp2/Abr/Iqsec1/Zzef1/Hrh1/Cyfip1/Rin1/Jak2/Bcr/Lnpep/Npy1r/Pnkd/Slc4a8/Nr3c1/Cabp1/Ophn1/Pde9a/Vps54/Npr2/Fyn/Syn3/Grk2/Syn2/Plcg1/Stxbp5/Rapgef2/Tnf/Htr7/Cd24a/Chrnb1/Wnk1/Anxa7/Dlgap3/Gnai2/Chmp2b/Cplx2/Myo6/Slc12a2/Gnaq/Lzts1/Lin7a/Aph1c/Adrb2/Pcdhb16/Pink1/Nrgn/Mink1/E…
GO:0051701	biological process involved in interaction with host	107	-0.458981	-1.64451	0.000394046	0.000394046	0.0037824	1893	tags=36%, list=14%, signal=32%	Exoc2/Vps37b/Tpcn1/Dynlt1a/Trim11/Grk2/Chmp1b/Ciita/Mid2/Insr/Chmp2b/Ctsb/Ifitm1/Trim12a/Ifitm3/Trim5/Hyal2/Trim56/Ly6e/Trim12c/Trim25/Nectin2/Nrp1/Trim30d/Cd74/Trim21/Trim34a/Pglyrp1/Trim6/Trim30a/Cav2/Gbp2/Cav1/Gbp3/Gbp7/Ch25h/Scarb1/Gbp9/Gbp6
GO:0032409	regulation of transporter activity	160	-0.415094	-1.57196	0.00039773	0.00039773	0.00380256	1592	tags=20%, list=12%, signal=18%	Stac/Plcg2/Adrb2/Atp1b3/Hecw2/Dmd/Cnksr3/Ikbkb/Klhl24/Ehd3/Gstm7/Dysf/Mrln/Abcb1b/Agrn/Plcb1/Mef2c/Chp2/Ctss/Kcnq1/Rasgrf2/Cav1/Shank3/Atp1b2/Hrc/Trem2/Lrrc55/Abcb1a/Tesc/Abcc9/Casq2/Kcnj8
GO:0007131	reciprocal meiotic recombination	34	0.652265	1.94706	0.000398764	0.000398764	0.00380256	2116	tags=44%, list=15%, signal=37%	4930447C04Rik/Rad51/Top2a/Trip13/Brip1/Psmc3ip/Fancm/Chtf18/Cenps/Rad54l/Rad51ap1/Fancd2/Rad54b/Eme1/Topbp1
GO:0140527	reciprocal homologous recombination	34	0.652265	1.94706	0.000398764	0.000398764	0.00380256	2116	tags=44%, list=15%, signal=37%	4930447C04Rik/Rad51/Top2a/Trip13/Brip1/Psmc3ip/Fancm/Chtf18/Cenps/Rad54l/Rad51ap1/Fancd2/Rad54b/Eme1/Topbp1
GO:0060021	roof of mouth development	78	0.519189	1.78567	0.000409071	0.000409071	0.00389233	1179	tags=28%, list=9%, signal=26%	Osr1/Loxl3/Ephb2/Ephb3/Fzd2/Wnt5a/Tgfb3/Wnt11/Pkdcc/Bnc2/Inhba/Alx4/Msc/Bmpr1a/Prrx1/Fzd1/Osr2/Gli3/Pdgfra/Tmem107/Asph/Tgfb2
GO:0043547	positive regulation of GTPase activity	196	-0.404035	-1.56952	0.000417719	0.000417719	0.00396596	2192	tags=31%, list=16%, signal=26%	Sos1/Rhog/Bcr/Dock8/Mmut/Asap2/Tbc1d8/Prex1/Sema4d/Srgap2/Rapgef2/Chn2/Tbc1d22b/Snx13/Sos2/Ccl12/Ccl3/Tbc1d4/Gmip/Ric1/Rgp1/Cd40/Arhgap29/Arhgap45/Rgs16/Rasgrp4/Ralgapa1/Rasgef1b/Rapgef1/Tbc1d22a/Chn1/Dock6/Gpr65/Pkp4/Ccl9/Arhgef7/Ccl8/Ralgapa2/Epha2/Rapgef4/Arhgef5/Rapgef5/Arap2/Rasgrp2/Arap3/Tbc1d2/Cav2/Rapgef3/Rasgrp3/Dock9/Rasgrf2/Adap2/Prex2/Itga6/Ntf3/Arhgef15/Tbc1d30/Arhgap25/Ccl6/Ccr7
GO:0032819	positive regulation of natural killer cell proliferation	15	-0.782998	-1.89539	0.000421674	0.000421674	0.0039948	2233	tags=80%, list=16%, signal=67%	Stat5b/Tyk2/Jak2/H2-T22/H2-K1/Il15/H2-D1/Flt3l/H2-Q4/H2-Q7/H2-Q6/H2-T23
GO:0030323	respiratory tube development	185	0.416069	1.58487	0.000428432	0.000428432	0.00405003	1815	tags=29%, list=13%, signal=25%	Rbp4/Lox/Aldh1a2/Lif/Rcn3/Tnc/Fgf7/Loxl3/Fbn1/Gpsm2/Ccbe1/Adamtsl2/Wnt5a/Col6a1/Tgfb3/Pkdcc/Adamts2/Pcsk5/Zfpm2/Col3a1/Ccn2/Mgp/Ltbp3/Bmpr1a/Pdpn/Fgfr1/Igf1/Fgf2/Meg3/Ptk7/Gli3/Vegfa/Sox9/Pdgfra/Hsd11b1/Hs6st1/Fndc3b/Lama1/Gli2/Aimp2/Traf4/Tns3/Ext1/Foxp4/Hps1/Fgf18/Plod3/Ada/Rspo2/Mmp14/Hikeshi/Sparc/Ctsh
GO:0061564	axon development	402	0.338672	1.41065	0.000435589	0.000435589	0.00410877	1527	tags=20%, list=11%, signal=18%	Tubb3/Mgarp/Slit2/Nrg1/Artn/Tnc/Ephb2/Bmpr1b/Ephb3/Dclk1/Epha3/Cdh11/Shox2/Ndn/Sema3c/Slit3/Crabp2/Tnn/Enpp1/Thy1/Map1a/Fn1/Wnt5a/Prkca/Cacna1a/Pak3/Ust/Ptn/Tubb2b/Ptprs/Tiam1/Dock7/Matn2/Ncam1/Sema6c/Numbl/Emb/Neo1/Lrp1/Tnfrsf12a/Mmp2/Dbn1/Robo1/Arhgap32/Dhfr/Pak1/Tsku/Vash2/Arhgef25/Gli3/Rac3/Fzd3/Ptprf/Nfix/Epb41l3/Sema5a/Myh10/Gbx2/Vegfa/Egr2/Nectin1/Vax2/Unc5c/Ryk/Bsg/Gpm6b/Tgfb2/Fxn/Plxnb2/…
GO:0002864	regulation of acute inflammatory response to antigenic stimulus	19	-0.736664	-1.90602	0.000444081	0.000444081	0.0041741	1275	tags=63%, list=9%, signal=57%	Il20rb/H2-K1/H2-D1/Fcgr3/Fcer1g/Fcgr2b/H2-Q4/H2-Q7/Fcgr1/H2-Q6/H2-T23/Ccr7
GO:0015914	phospholipid transport	64	-0.542007	-1.79625	0.000444431	0.000444431	0.0041741	1419	tags=28%, list=10%, signal=25%	Plscr4/Pctp/Atp8a1/P2rx7/Atp11c/Abca7/Abcb1b/Pitpnm2/Apoe/Abcg1/Abca1/Apoc2/Abca3/Pitpnc1/Pltp/Scarb1/Pitpnm3/Abcb1a
GO:0002495	antigen processing and presentation of peptide antigen via MHC class II	19	-0.735893	-1.90403	0.000452704	0.000452704	0.00423355	1723	tags=63%, list=13%, signal=55%	H2-Ob/H2-Eb1/Unc93b1/H2-DMa/H2-Aa/B2m/Cd74/H2-Ab1/Fcer1g/Fcgr2b/Ctss/Trem2
GO:0050854	regulation of antigen receptor-mediated signaling pathway	51	-0.583444	-1.85687	0.000452704	0.000452704	0.00423355	2343	tags=51%, list=17%, signal=42%	Lck/Rc3h1/Lilrb4a/Lgals3/Usp12/Pawr/Lpxn/Slc39a10/Ubash3a/Ptprc/Lipa/Nfam1/Stap1/Dgkz/Elf1/Nectin2/Dusp22/Dusp3/Prkd2/Ptpn6/Lyn/Laptm5/Cd300a/Prkcb/Prkch/Ccr7
GO:0010874	regulation of cholesterol efflux	28	-0.673693	-1.89452	0.000456153	0.000456153	0.00425667	1158	tags=39%, list=8%, signal=36%	Ptch1/Abca7/Eepd1/Pparg/Apoe/Abcg1/Abca1/Abca3/Pltp/Cav1/Trem2
GO:0019935	cyclic-nucleotide-mediated signaling	70	-0.531953	-1.79071	0.000463211	0.000463211	0.0043133	868	tags=26%, list=6%, signal=24%	Pde1c/Ece1/Ahr/Apoe/Nos2/Pde2a/Pde8b/Cd36/Gucy1b1/Npr1/Pde7b/Ednrb/Aqp1/Ramp3/Aplnr/Calcr/Gucy1a1/Chga
GO:1903557	positive regulation of tumor necrosis factor superfamily cytokine production	105	-0.473699	-1.68919	0.000464841	0.000464841	0.00431925	2188	tags=43%, list=16%, signal=36%	Tmem106a/Jak2/Sash3/Adam8/H2-T22/Tlr4/Arhgef2/Tlr1/Ly96/Lgals9/Ccl3/Tgfb1/Ptprc/Plcg2/Nod1/Ifngr1/Hspb1/Lpl/Ifih1/Tlr2/Ccr5/Oas2/H2-K1/Cd14/Clu/Syk/Csf1r/H2-D1/Ptafr/Fcgr3/Fcer1g/Nod2/Oas1a/Tyrobp/Fcgr2b/Cd84/H2-Q4/Tlr3/H2-Q7/Ccr2/Cd36/H2-Q6/Cybb/H2-T23/Ccr7
GO:0043549	regulation of kinase activity	483	-0.331516	-1.39995	0.000466109	0.000466109	0.00432181	2103	tags=25%, list=15%, signal=22%	Apc/Dusp1/Adam17/Deptor/Ret/Plec/Ccny/Tigar/Cdkn1c/Dipk2a/Ralb/Tlr4/Rapgef2/Il6ra/Ptpro/Tnf/Sfn/Tlr1/Cbl/Cd24a/Pkib/Insr/Bmp2/Dusp7/Sash1/Ptprc/Gnaq/Cd86/Nr2f2/Adrb2/Synpo2/Rgcc/Heg1/Inpp5k/Midn/Rgs2/Adar/Cd40/Fgfr3/Dab2ip/Adarb1/Hspb1/Map2k6/Gprc5b/Hyal2/Pxn/C5ar1/Fbxo7/Mertk/Rassf2/Flt4/Fgd2/Pkn1/Fzd4/Dusp22/P2rx7/Ppp2r5a/Dusp3/Irgm2/Tcim/Ccng2/Syk/Pdgfd/Dbndd2/Csf1r/Rb1/Cd74/Tnxb/Tnfrsf11a/Ppm…
GO:0002438	acute inflammatory response to antigenic stimulus	25	-0.695852	-1.9192	0.00046841	0.00046841	0.00433393	1275	tags=52%, list=9%, signal=47%	Il20rb/H2-K1/H2-D1/Fcgr3/Fcer1g/Fcgr2b/H2-Q4/H2-Q7/Fcgr1/H2-Q6/H2-T23/Fcgr4/Ccr7
GO:0002863	positive regulation of inflammatory response to antigenic stimulus	19	-0.735743	-1.90364	0.000469949	0.000469949	0.00433743	2020	tags=68%, list=15%, signal=58%	H2-T22/Tnf/Cd24a/H2-K1/H2-D1/Fcgr3/Fcer1g/H2-Q4/H2-Q7/Fcgr1/H2-Q6/H2-T23/Ccr7
GO:0030324	lung development	182	0.409304	1.55934	0.000470779	0.000470779	0.00433743	1815	tags=28%, list=13%, signal=25%	Rbp4/Lox/Aldh1a2/Lif/Rcn3/Tnc/Fgf7/Loxl3/Fbn1/Gpsm2/Ccbe1/Adamtsl2/Wnt5a/Col6a1/Tgfb3/Pkdcc/Adamts2/Zfpm2/Col3a1/Ccn2/Mgp/Ltbp3/Bmpr1a/Pdpn/Fgfr1/Igf1/Fgf2/Meg3/Ptk7/Gli3/Vegfa/Sox9/Pdgfra/Hsd11b1/Hs6st1/Fndc3b/Lama1/Gli2/Aimp2/Tns3/Ext1/Foxp4/Hps1/Fgf18/Plod3/Ada/Rspo2/Mmp14/Hikeshi/Sparc/Ctsh
GO:0032412	regulation of monoatomic ion transmembrane transporter activity	147	-0.429788	-1.60556	0.000481851	0.000481851	0.00443008	1592	tags=22%, list=12%, signal=19%	Stac/Plcg2/Adrb2/Atp1b3/Hecw2/Dmd/Cnksr3/Ikbkb/Klhl24/Ehd3/Gstm7/Dysf/Mrln/Abcb1b/Agrn/Plcb1/Mef2c/Chp2/Ctss/Kcnq1/Rasgrf2/Cav1/Shank3/Atp1b2/Hrc/Trem2/Lrrc55/Abcb1a/Tesc/Abcc9/Casq2/Kcnj8
GO:0043537	negative regulation of blood vessel endothelial cell migration	33	-0.636761	-1.85391	0.000485553	0.000485553	0.00443541	1838	tags=52%, list=13%, signal=45%	Tnf/Meox2/Tgfb1/Hdac5/Rgcc/Angpt2/Notch1/Atp2b4/Vash1/Pparg/Mef2c/Jup/Robo4/Apoe/Card10/Mmrn2/Dll4
GO:0030218	erythrocyte differentiation	133	-0.455279	-1.6653	0.000485761	0.000485761	0.00443541	2854	tags=37%, list=21%, signal=29%	Nemp1/Hba-a2/Cebpg/Chmp5/Zfp36/Alas1/Smad5/Gata3/Nfe2l1/Hba-a1/Stat5b/Cflar/Jak2/Tgfbr3/Dnase2a/Tmod3/Ptbp3/Kmt2e/Fam210b/Sp1/Nckap1l/Cdk6/Klf13/Bmp4/Adar/Gata2/Stat1/Zfpm1/Hmga1/Hoxa5/Rb1/Ets1/B2m/Lmo2/Rac2/Spi1/Sh2b3/Lyn/Inpp5d/Isg15/Ikzf1/Plcb1/Adgrf5/Exoc6/Kcnq1/Kit/Epas1/Tal1/Hcls1
GO:0048880	sensory system development	295	0.358792	1.4495	0.000486503	0.000486503	0.00443541	1044	tags=17%, list=8%, signal=16%	Dio3/Rbp4/Twist2/Col8a2/Col8a1/Mfap5/Aldh1a3/Aldh1a2/Lif/Smoc1/Lmx1b/Twist1/Ephb2/Bmpr1b/Meis3/Col5a1/Tulp1/Thy1/Mfap2/Cyp1b1/Col5a2/Meis2/Fat1/Tenm3/Inhba/Ptn/Fjx1/Bfsp1/Megf11/Rcn1/Mab21l2/Egfr/Nphp4/Fgf2/Ahi1/Fzd5/Tsku/Osr2/C3/Ttll5/Gli3/Cryab/Nfix/Aldh1a1/Myh10/Vegfa/Sox9/Pdgfra/Sh3pxd2b/Nectin1/Vax2
GO:0150063	visual system development	295	0.358792	1.4495	0.000486503	0.000486503	0.00443541	1044	tags=17%, list=8%, signal=16%	Dio3/Rbp4/Twist2/Col8a2/Col8a1/Mfap5/Aldh1a3/Aldh1a2/Lif/Smoc1/Lmx1b/Twist1/Ephb2/Bmpr1b/Meis3/Col5a1/Tulp1/Thy1/Mfap2/Cyp1b1/Col5a2/Meis2/Fat1/Tenm3/Inhba/Ptn/Fjx1/Bfsp1/Megf11/Rcn1/Mab21l2/Egfr/Nphp4/Fgf2/Ahi1/Fzd5/Tsku/Osr2/C3/Ttll5/Gli3/Cryab/Nfix/Aldh1a1/Myh10/Vegfa/Sox9/Pdgfra/Sh3pxd2b/Nectin1/Vax2
GO:0042270	protection from natural killer cell mediated cytotoxicity	12	-0.814781	-1.87936	0.000491843	0.000491843	0.00447474	2020	tags=83%, list=15%, signal=71%	H2-T22/Tap2/Tap1/H2-K1/H2-D1/Clec2d/H2-Q4/H2-Q7/H2-Q6/H2-T23
GO:0009225	nucleotide-sugar metabolic process	32	0.661749	1.95171	0.000496847	0.000496847	0.00451085	1740	tags=44%, list=13%, signal=38%	Cmah/Gfpt2/Gmppb/Pmm1/Pgm3/Ugdh/Gmds/Csgalnact1/Gnpnat1/Ugp2/Gfpt1/Uxs1/Guk1/Uap1
GO:0055094	response to lipoprotein particle	26	-0.678213	-1.88805	0.000507317	0.000507317	0.00459633	1887	tags=54%, list=14%, signal=47%	Tlr4/Tgfb1/Cd9/Lpl/Mylip/Itgb2/Syk/Cd68/Fcer1g/Pparg/Apoe/Cd36/Cdh13/Trem2
GO:0032940	secretion by cell	651	-0.313719	-1.35937	0.000510348	0.000510348	0.0046142	2015	tags=25%, list=15%, signal=22%	Tcirg1/Myo1g/Rab11b/Slc4a8/Nr3c1/Trarg1/Scamp1/Trpv4/Il1rn/Rab11fip5/Rab8b/Ralb/Syn3/Grk2/Syn2/Tlr4/Tspan18/Trappc11/Rab27a/Coro1a/Stxbp5/Tnf/Pik3c2a/Htr7/Vamp3/Nckap1l/Nagpa/Bmp2/Atp9a/Anxa7/Psap/Dpysl2/Gnai2/Lgals9/P2ry12/Cplx2/Myo6/Slc25a22/Tgfb1/Sdcbp/Slc12a2/Gnaq/Lin7a/Pip5k1c/Ric1/Rgcc/Pink1/Klf7/Midn/Cd2ap/P2ry2/Cxcl12/Tnfrsf1b/Apln/Lat2/Git1/Map2k6/Bloc1s6/Gata2/Exoc8/Lrp5/Tlr2/Myo1f/Git2…
GO:0061028	establishment of endothelial barrier	46	-0.58739	-1.82672	0.000512185	0.000512185	0.00461957	1132	tags=57%, list=8%, signal=52%	Zdhhc21/Rdx/Icam1/Rap1a/Myadm/Tjp2/Msn/Rapgef2/Tnf/Ikbkb/Rapgef1/Tjp1/Abcb1b/Il1b/Afdn/Plcb1/Cldn5/Robo4/Pecam1/Rapgef3/Pde2a/Ppp1r16b/Cdh5/F11r/Ednrb/Sox18
GO:0032760	positive regulation of tumor necrosis factor production	104	-0.471115	-1.678	0.000513062	0.000513062	0.00461957	2188	tags=42%, list=16%, signal=36%	Tmem106a/Jak2/Sash3/H2-T22/Tlr4/Arhgef2/Tlr1/Ly96/Lgals9/Ccl3/Tgfb1/Ptprc/Plcg2/Nod1/Ifngr1/Hspb1/Lpl/Ifih1/Tlr2/Ccr5/Oas2/H2-K1/Cd14/Clu/Syk/Csf1r/H2-D1/Ptafr/Fcgr3/Fcer1g/Nod2/Oas1a/Tyrobp/Fcgr2b/Cd84/H2-Q4/Tlr3/H2-Q7/Ccr2/Cd36/H2-Q6/Cybb/H2-T23/Ccr7
GO:0010975	regulation of neuron projection development	459	0.33234	1.40034	0.000514423	0.000514423	0.00462227	1290	tags=16%, list=9%, signal=15%	Mgarp/Slit2/Sfrp1/Zfp804a/Nrg1/Sfrp2/Serpinf1/Lif/Ephb2/Ephb3/P3h1/Epha3/Shox2/Abi3bp/Cxcl5/Obsl1/Lgals1/Sema3c/Crabp2/Tnn/Ndrg4/Ncs1/Thy1/Mdk/Fn1/Wnt5a/Tenm3/Cacna1a/Sphk1/Lpar1/Ror2/Pak3/Ust/Ptn/Tubb2b/Sdc2/Ptprs/Tiam1/Nr2f1/Prrx1/Sema6c/Numbl/Neo1/Lrp1/Fzd1/Fgfr1/Tnfrsf12a/Dbn1/Magi2/Ahi1/Robo1/Arhgap32/Pak1/Tsku/Nme2/Ptk7/Dtnbp1/Ptprf/Hspa5/Ezh2/Nfatc4/Bhlhb9/Sema5a/Vegfa/Serpine2/Hgf/Ryk/Dpy…
GO:0045824	negative regulation of innate immune response	86	-0.507516	-1.75253	0.00051938	0.00051938	0.00464934	2020	tags=40%, list=15%, signal=34%	H2-T22/Dhx58/Samhd1/Zdhhc18/Tap2/Lgals9/Tgfb1/Tap1/Ifi206/Trafd1/Adar/Ifi207/Mndal/Nmi/Stat2/H2-K1/H2-D1/Ifi209/Trim21/Oas1a/Clec2d/Ceacam1/Ifi203/Isg15/Pparg/H2-Q4/Igf2/Nlrc5/H2-Q7/Parp14/H2-Q6/H2-T23/Ifi213/Ifi208
GO:0018108	peptidyl-tyrosine phosphorylation	239	-0.396337	-1.56737	0.000520411	0.000520411	0.00464934	1945	tags=30%, list=14%, signal=26%	Tspan9/Fyn/Tlr4/Sema4d/Arhgef2/Il6ra/Tnf/Inpp5f/Srms/Aatk/Cbl/Cd24a/Insr/Ctnnd1/Enpp2/Socs3/Tgfb1/Ptprc/Plcg2/Parp9/Ptpn4/Cd40/Fgfr3/Csf3/Irf1/Gprc5b/Hyal2/Pxn/Jak3/Flt4/Dusp22/Mapk3/Il15/Nrp1/Itgb2/Syk/Pdgfd/Csf1r/Bmp6/Osm/Cd74/Yes1/Plpp3/Nod2/Agrn/Ptpn6/Aplp2/Lyn/Bst1/Gprc5a/Cd300a/Kitl/Ehd4/Flt1/Tek/Pecam1/Cav2/Pdgfb/Parp14/Cd36/Abi3/Cav1/Vtn/Kit/Hck/Ntf3/Hcls1/Trem2/Kdr/Efna1/Samsn1/Ighm
GO:0006271	DNA strand elongation involved in DNA replication	13	0.796646	1.8964	0.000521988	0.000521988	0.00464934	2655	tags=85%, list=19%, signal=68%	Mcm4/Pole3/Lig1/Mcm7/Mcm3/Pole/Pcna/Gins1/Pold2/Pola1/Pold3
GO:0034501	protein localization to kinetochore	16	0.777185	1.94971	0.00052277	0.00052277	0.00464934	1222	tags=44%, list=9%, signal=40%	Knl1/Ttk/Spdl1/Cdk1/Cenpq/Aurkb/Zwilch
GO:1903083	protein localization to condensed chromosome	16	0.777185	1.94971	0.00052277	0.00052277	0.00464934	1222	tags=44%, list=9%, signal=40%	Knl1/Ttk/Spdl1/Cdk1/Cenpq/Aurkb/Zwilch
GO:0035740	CD8-positive, alpha-beta T cell proliferation	15	-0.776106	-1.8787	0.000528035	0.000528035	0.0046866	2180	tags=73%, list=16%, signal=62%	Lilrb4a/H2-T22/Irf1/Sh3rf1/H2-K1/H2-D1/Vsir/H2-Q4/H2-Q7/H2-Q6/H2-T23
GO:0010976	positive regulation of neuron projection development	196	0.396862	1.52047	0.000530946	0.000530946	0.00470286	1290	tags=18%, list=9%, signal=17%	Zfp804a/Nrg1/Serpinf1/Lif/Ephb2/P3h1/Epha3/Cxcl5/Tnn/Ndrg4/Mdk/Wnt5a/Tenm3/Sphk1/Ror2/Pak3/Ptn/Tubb2b/Tiam1/Lrp1/Fzd1/Fgfr1/Dbn1/Magi2/Ahi1/Nme2/Ptk7/Hspa5/Ezh2/Bhlhb9/Serpine2/Hgf/Dpysl3/Plxnb2/Nme1/Cx3cl1
GO:0002710	negative regulation of T cell mediated immunity	16	-0.767794	-1.88614	0.000533222	0.000533222	0.00471344	2180	tags=69%, list=16%, signal=58%	Lilrb4a/Nckap1l/Ptprc/Il20rb/Il4i1/Dusp22/Hfe/Ahr/Il7r/Nod2/Vsir
GO:0071103	DNA conformation change	56	0.565642	1.83884	0.000539685	0.000539685	0.00476092	1801	tags=34%, list=13%, signal=30%	Mcm8/Rad51/Gins2/Anxa1/Top2a/Cdc45/Blm/Gins3/Mcm4/Recql4/Mcm5/Mcm7/Mcm2/Ddx1/Mcm3/Top1mt/Mcm6/Gins4/Gins1
GO:0035710	CD4-positive, alpha-beta T cell activation	99	-0.476829	-1.68593	0.000551439	0.000551439	0.00485478	2828	tags=38%, list=21%, signal=31%	Card11/Tmem98/Bcl3/Cd81/Batf/Rara/Il2ra/Gata3/Zc3h12a/Rc3h1/Lilrb4a/Gpr183/Runx3/Sash3/Tcirg1/Il6ra/Cd24a/Nckap1l/Lgals9/Nlrp3/Tgfb1/Irf1/Jak3/Pf4/Sh3rf1/Cd83/Nfkbid/Ly9/Hlx/Vsir/Il2rg/Ccr2/Irgm1/Gimap5/Gimap1/Cd274/Rsad2/Ccr7
GO:0002486	antigen processing and presentation of endogenous peptide antigen via MHC class I via ER pathway, TAP-independent	15	-0.775539	-1.87733	0.000554658	0.000554658	0.00487327	2020	tags=73%, list=15%, signal=63%	H2-T22/Raet1e/Mill2/H2-K1/Hfe/H2-D1/H2-Q4/H2-Q7/H2-T24/H2-Q6/H2-T23
GO:0001910	regulation of leukocyte mediated cytotoxicity	64	-0.536466	-1.77788	0.000557719	0.000557719	0.00488049	1714	tags=45%, list=12%, signal=40%	Raet1e/Nckap1l/Tap2/Lgals9/Tgfb1/Tap1/Ptprc/Stap1/Mill2/Nectin2/P2rx7/H2-K1/Hfe/B2m/H2-D1/Spi1/Il7r/Tyrobp/Clec2d/Ceacam1/H2-Q4/Igf2/Cx3cr1/H2-Q7/H2-T24/Gimap5/H2-Q6/Pik3r6/H2-T23
GO:0043266	regulation of potassium ion transport	64	-0.535742	-1.77548	0.000557719	0.000557719	0.00488049	1543	tags=28%, list=11%, signal=25%	Gnaq/Adrb2/Atp1b3/Klhl24/Plcb4/Kcnj2/Agrn/Kcnq1/Cav1/Atp1b2/Nos3/Trem2/Lrrc55/Kcna5/Edn3/Akap5/Abcc9/Casq2
GO:0032815	negative regulation of natural killer cell activation	15	-0.773682	-1.87283	0.000563532	0.000563532	0.00492147	2180	tags=67%, list=16%, signal=56%	Lilrb4a/H2-T22/Lgals9/H2-K1/H2-D1/Pglyrp1/H2-Q4/H2-Q7/H2-Q6/H2-T23
GO:0002228	natural killer cell mediated immunity	53	-0.566579	-1.7995	0.000570188	0.000570188	0.00496964	2020	tags=40%, list=15%, signal=34%	H2-T22/Rab27a/Coro1a/Tap2/Lgals9/Tgfb1/Tap1/Nectin2/H2-K1/H2-D1/Ptpn6/Clec2d/Ceacam1/H2-Q4/Igf2/H2-Q7/Gimap5/H2-Q6/Pik3r6/H2-T23/Fcgr4
GO:0098660	inorganic ion transmembrane transport	446	-0.334902	-1.39883	0.000582018	0.000582018	0.00506262	1963	tags=22%, list=14%, signal=20%	Tcirg1/Slc4a8/Trpv4/Cxcl10/Gpd1l/Fyn/Fxyd5/Pawr/Plcg1/Slc30a4/Coro1a/Mcoln1/Pik3c2a/Abcb7/Wnk1/Atp6v0d2/Atox1/Slc39a10/P2ry12/Stac/Tgfb1/Atp6v0a1/Slc12a2/Ptprc/Pde4b/Plcg2/Lrrc8a/Adrb2/Bmp4/Cacng1/Atp1b3/Hecw2/Dmd/Clcn3/Cnksr3/Slc31a2/Tmem37/Slc24a5/Steap4/Slc6a6/Klhl24/Ehd3/Plcb4/Ccr5/Slc12a6/Orai1/Slc12a9/P2rx7/Gstm7/Cacna1h/Kcnj2/Tcn2/Dysf/Ahr/Slc8b1/Mrln/Slc12a7/Itpr3/Agrn/Ptpn6/Atp2b4/Chd7/S…
GO:0006936	muscle contraction	221	-0.387289	-1.51683	0.000601164	0.000601164	0.00521874	2092	tags=25%, list=15%, signal=22%	Tmod3/Tbx2/Npy1r/Trpv4/Vps54/Gpd1l/Grk2/Pawr/Tnnc2/Htr7/Chrnb1/Stac/Pde4b/Tmod1/Adrb2/Cacng1/Rgs2/Mylk/Map2k6/Dmd/Tnni2/Ehd3/Synm/Stc1/Dock4/Cacna1h/Kcnj2/Calcrl/Apbb2/Tbx3/Ptafr/Agrn/Ptgs1/Atp2b4/Rcsd1/Jup/Flt1/Cxcr4/Itga2/Kcnq1/Lmod1/Cav1/Kit/Ncf1/Ednrb/Kcna5/Gja5/Cd38/Edn3/Gucy1a1/Atp1a2/Chga/Abcc9/Casq2/Myh11/Kcnj8
GO:0001649	osteoblast differentiation	180	0.410589	1.55899	0.000614048	0.000614048	0.00532	1039	tags=19%, list=8%, signal=18%	Twist2/Sfrp1/Lox/Sfrp2/Cthrc1/Smoc1/Ccn4/Twist1/Fhl2/Fbn2/Bmpr1b/Tmem119/Scube2/Shox2/Tnfaip6/Pth1r/Tnn/Enpp1/Col1a1/Wnt11/Tent5a/Bmpr1a/Fzd1/Creb3l1/Fgfr1/Igf1/Fgf2/Glis1/Gli3/Spp1/Tmem53/Vegfa/Sox9/Sh3pxd2b
GO:0002712	regulation of B cell mediated immunity	56	-0.568581	-1.83957	0.000623228	0.000623228	0.00537814	1567	tags=39%, list=11%, signal=35%	Tgfb1/Ptprc/Cr1l/Cd40/Kmt5b/Nectin2/H2-K1/Il27ra/H2-D1/Tnfsf13/Fcgr3/Fcer1g/Nod2/Ptpn6/Fcgr2b/H2-Q4/H2-Q7/Fcgr1/Gimap5/H2-Q6/H2-T23/Trem2
GO:0002889	regulation of immunoglobulin mediated immune response	56	-0.568581	-1.83957	0.000623228	0.000623228	0.00537814	1567	tags=39%, list=11%, signal=35%	Tgfb1/Ptprc/Cr1l/Cd40/Kmt5b/Nectin2/H2-K1/Il27ra/H2-D1/Tnfsf13/Fcgr3/Fcer1g/Nod2/Ptpn6/Fcgr2b/H2-Q4/H2-Q7/Fcgr1/Gimap5/H2-Q6/H2-T23/Trem2
GO:0048608	reproductive structure development	214	0.393768	1.53189	0.000629326	0.000629326	0.00542003	1564	tags=23%, list=11%, signal=21%	Rbp4/Sfrp1/Fst/Sfrp2/Serpinf1/Ptx3/Osr1/Tnc/Fgf7/Serpine1/Bmpr1b/Tnfaip6/Pla2g4a/Tyro3/Nupr1/Runx1/Wnt5a/Col6a1/Ror2/Inhba/Zfpm2/Rhobtb3/Aspm/Angpt1/Igf1/Brip1/Mmp2/Sulf1/Rnase10/C3/Ptprn/Fancf/Vegfa/Cyp7b1/Sox9/Serpine2/Pdgfra/Itgav/Gas2/Cd44/Fanca/Axl/Tgfb2/Dhcr24/Nup107/Brca2/Gli2/Prdx4/Bmp5/Src
GO:1900226	negative regulation of NLRP3 inflammasome complex assembly	14	-0.781001	-1.84582	0.000636803	0.000636803	0.00543508	936	tags=36%, list=7%, signal=33%	Irgm2/Igtp/Trim30a/Irgm1/Trem2
GO:0099537	trans-synaptic signaling	480	-0.319018	-1.34672	0.000639335	0.000639335	0.00543508	2611	tags=29%, list=19%, signal=24%	Creb1/Atp1a3/Rap1a/Mtmr2/Celf4/Met/Rara/Fabp5/Fbxl20/Napb/Hap1/Rhot1/Synj1/Ptk2/Npff/Lin7c/Rab11a/Pvalb/Stxbp2/Abr/Iqsec1/Zzef1/Hrh1/Cyfip1/Rin1/Jak2/Bcr/Lnpep/Npy1r/Pnkd/Slc4a8/Nr3c1/Ophn1/Pde9a/Vps54/Npr2/Fyn/Syn3/Grk2/Syn2/Plcg1/Stxbp5/Rapgef2/Tnf/Htr7/Cd24a/Chrnb1/Wnk1/Dlgap3/Gnai2/Chmp2b/Cplx2/Myo6/Slc12a2/Lzts1/Lin7a/Aph1c/Adrb2/Pcdhb16/Pink1/Nrgn/Mink1/Eif4ebp2/Ctnnb1/Cd2ap/P2ry2/Dgkz/Adar…
GO:0001796	regulation of type IIa hypersensitivity	12	-0.810721	-1.86999	0.000639828	0.000639828	0.00543508	978	tags=75%, list=7%, signal=70%	H2-K1/H2-D1/Fcgr3/Fcer1g/H2-Q4/H2-Q7/Fcgr1/H2-Q6/H2-T23
GO:0001798	positive regulation of type IIa hypersensitivity	12	-0.810721	-1.86999	0.000639828	0.000639828	0.00543508	978	tags=75%, list=7%, signal=70%	H2-K1/H2-D1/Fcgr3/Fcer1g/H2-Q4/H2-Q7/Fcgr1/H2-Q6/H2-T23
GO:0002892	regulation of type II hypersensitivity	12	-0.810721	-1.86999	0.000639828	0.000639828	0.00543508	978	tags=75%, list=7%, signal=70%	H2-K1/H2-D1/Fcgr3/Fcer1g/H2-Q4/H2-Q7/Fcgr1/H2-Q6/H2-T23
GO:0002894	positive regulation of type II hypersensitivity	12	-0.810721	-1.86999	0.000639828	0.000639828	0.00543508	978	tags=75%, list=7%, signal=70%	H2-K1/H2-D1/Fcgr3/Fcer1g/H2-Q4/H2-Q7/Fcgr1/H2-Q6/H2-T23
GO:0060330	regulation of response to type II interferon	11	-0.823563	-1.86309	0.000641051	0.000641051	0.00543508	1447	tags=64%, list=11%, signal=57%	Parp9/Irgm2/Igtp/Pparg/Nlrc5/Parp14/Irgm1
GO:0060334	regulation of type II interferon-mediated signaling pathway	11	-0.823563	-1.86309	0.000641051	0.000641051	0.00543508	1447	tags=64%, list=11%, signal=57%	Parp9/Irgm2/Igtp/Pparg/Nlrc5/Parp14/Irgm1
GO:0090179	planar cell polarity pathway involved in neural tube closure	13	0.790051	1.8807	0.000644253	0.000644253	0.00545162	807	tags=46%, list=6%, signal=43%	Sfrp1/Sfrp2/Fzd2/Wnt5a/Fzd1/Ptk7
GO:0048609	multicellular organismal reproductive process	533	0.324757	1.38518	0.000648403	0.000648403	0.00547611	1714	tags=17%, list=12%, signal=16%	Vdr/Rbp4/Fst/Rbm46/Lif/Drd4/Ptx3/Adamts16/Ptgis/Rpl39l/Bmpr1b/Tmem119/Cyp51/Ndn/Tnfaip6/Pla2g4a/Tyro3/Mcm8/Mdk/Runx1/Ccdc136/4930447C04Rik/Adamts2/Avpr1a/B4galnt1/Il11ra1/Ptgs2/Ttk/Inhba/Ptn/Aspm/H19/Top2a/M1ap/Pgm3/Trip13/Egfr/Igf1/Brip1/Spaca1/Meg3/Ddias/Ptprn/Fancf/Ttll5/Pafah1b3/Nkd1/Rad18/Ift20/Chtf18/Dnmt3l/Spata24/Sox9/Serpine2/Cip2a/Plk1/Pdgfra/Sh3pxd2b/Mastl/Suv39h2/Gas2/Mns1/Fanca/Axl/N…
GO:0042327	positive regulation of phosphorylation	552	-0.322093	-1.37079	0.000650992	0.000650992	0.00548734	2002	tags=23%, list=15%, signal=20%	Ccny/Crebl2/Tigar/Tspan9/Dipk2a/Fyn/Ralb/Tlr4/Sema4d/Arhgef2/Rapgef2/Il6ra/Tnf/Tlr1/Cd24a/Insr/Nckap1l/Bmp2/Ctnnd1/Enpp2/Sash1/Tgfb1/Sdcbp/Ptprc/Slco3a1/Plcg2/Cd86/Adrb2/Bmp4/Rgcc/Pink1/Parp9/Fnip2/Apln/Cd40/Fgfr3/Dab2ip/Map2k6/Csf3/Cln3/Gprc5b/Pxn/Mertk/Grk3/Rassf2/Flt4/Sema7a/Fgd2/Fzd4/P2rx7/Il15/Irgm2/Eng/Tcim/Nrp1/Syk/Pdgfd/Csf1r/Bmp6/Osm/Cd74/Tnfrsf11a/Ephb4/Prr5l/Yes1/Mmd/Plpp3/Epha2/Aif1/N…
GO:1902043	positive regulation of extrinsic apoptotic signaling pathway via death domain receptors	13	0.789906	1.88036	0.000653658	0.000653658	0.00549917	175	tags=23%, list=1%, signal=23%	Sfrp1/Bmpr1b/Thbs1
GO:0046640	regulation of alpha-beta T cell proliferation	41	-0.600944	-1.81408	0.000658683	0.000658683	0.00552014	2171	tags=56%, list=16%, signal=47%	Ptpn22/Card11/Cd81/Il2ra/Tyk2/Jak2/H2-T22/Cd24a/Lgals9/Ptprc/Irf1/Sh3rf1/H2-K1/Syk/H2-D1/Vsir/H2-Q4/H2-Q7/Ccr2/Irgm1/H2-Q6/H2-T23/Cd274
GO:0006941	striated muscle contraction	124	-0.444458	-1.61781	0.000658683	0.000658683	0.00552014	1963	tags=25%, list=14%, signal=22%	Trpv4/Vps54/Gpd1l/Grk2/Tnnc2/Chrnb1/Stac/Pde4b/Adrb2/Rgs2/Map2k6/Dmd/Tnni2/Ehd3/Synm/Stc1/Cacna1h/Kcnj2/Agrn/Rcsd1/Jup/Cxcr4/Kcnq1/Cav1/Kcna5/Gja5/Atp1a2/Chga/Abcc9/Casq2/Kcnj8
GO:0090175	regulation of establishment of planar polarity	15	0.765522	1.87472	0.000677681	0.000677681	0.00565802	807	tags=40%, list=6%, signal=38%	Sfrp1/Sfrp2/Fzd2/Wnt5a/Fzd1/Ptk7
GO:1901741	positive regulation of myoblast fusion	15	-0.76997	-1.86385	0.000678899	0.000678899	0.00565802	1414	tags=47%, list=10%, signal=42%	Cxcl12/Gdf15/Ccl8/Scgb3a1/Flt3l/Cd53/Ehd2
GO:0001655	urogenital system development	45	0.579299	1.82865	0.000679073	0.000679073	0.00565802	1070	tags=33%, list=8%, signal=31%	Sfrp1/Serpinf1/Osr1/Tnc/Ephb2/Ephb3/Wnt5a/Igf1/Mmp2/Sulf1/Osr2/Hells/Cyp7b1/Sox9/Cd44
GO:0045582	positive regulation of T cell differentiation	101	-0.467837	-1.66133	0.000682051	0.000682051	0.00565802	2545	tags=38%, list=18%, signal=31%	Rara/Arid1a/Smarcd1/Il2ra/Rhoh/Gata3/Lck/Stat5b/Lilrb4a/Runx3/Sash3/Adam8/Nckap1l/Cd27/Lgals9/Nlrp3/Tgfb1/Zmiz1/Ptprc/H2-DMa/Irf1/Il4i1/Cd83/Nfkbid/H2-Aa/Syk/Cd74/Itpkb/Il7r/Sox13/Hlx/Vsir/Il2rg/Ccr2/Gimap5/Pik3r6/Zbtb16/Ccr7
GO:0001654	eye development	292	0.364148	1.46638	0.000683319	0.000683319	0.00565802	1044	tags=17%, list=8%, signal=16%	Dio3/Rbp4/Twist2/Col8a2/Col8a1/Mfap5/Aldh1a3/Aldh1a2/Lif/Smoc1/Lmx1b/Twist1/Ephb2/Bmpr1b/Meis3/Col5a1/Tulp1/Thy1/Mfap2/Cyp1b1/Col5a2/Meis2/Fat1/Tenm3/Inhba/Ptn/Fjx1/Bfsp1/Megf11/Rcn1/Mab21l2/Egfr/Nphp4/Fgf2/Ahi1/Fzd5/Tsku/Osr2/C3/Ttll5/Gli3/Cryab/Nfix/Aldh1a1/Myh10/Vegfa/Sox9/Pdgfra/Sh3pxd2b/Nectin1/Vax2
GO:0016053	organic acid biosynthetic process	201	0.39961	1.53894	0.000683765	0.000683765	0.00565802	2170	tags=31%, list=16%, signal=26%	Bcat1/Aldh1a3/Aldh1a2/Slc1a3/Rbp1/Phgdh/Ptges/Ptgis/Plod2/Brca1/Pla2g4a/Ass1/Avpr1a/Sphk1/Pycr1/Ptgs2/Anxa1/Sdsl/Mif/Aldh18a1/Ugdh/Hacd1/Dhfr/Abat/Dse/Fasn/Gsto1/Aldh1a1/Cyp7b1/Scd1/Fads1/Gls2/Fads2/Nanp/Chst12/Mthfd1l/Star/Elovl6/Cad/Pkm/Ggt5/Hacd2/Tecr/Plod3/Psat1/Fads3/Mri1/Mthfd1/Ldha/Per2/Mlycd/Acsl3/Pecr/Elovl4/Amacr/Acaca/Shmt2/Mtap/Gstp1/Lpgat1/Uros/Mecr
GO:0045601	regulation of endothelial cell differentiation	38	-0.603644	-1.80509	0.000684224	0.000684224	0.00565802	1838	tags=47%, list=13%, signal=41%	Foxj2/Tnf/Id1/Bmp4/Ctnnb1/Atoh8/Ikbkb/Bmp6/Notch1/Apold1/Ceacam1/Il1b/Plcb1/Cldn5/Notch4/Cdh5/F11r/Xdh
GO:0036037	CD8-positive, alpha-beta T cell activation	31	-0.650161	-1.85956	0.000687288	0.000687288	0.00566288	2180	tags=55%, list=16%, signal=46%	Lilrb4a/Runx3/H2-T22/Nckap1l/Irf1/Sh3rf1/H2-K1/Hfe/H2-D1/Igtp/Vsir/H2-Q4/H2-Q7/H2-Q6/H2-T23/Gimap1/Cd274
GO:0001934	positive regulation of protein phosphorylation	515	-0.324492	-1.37674	0.00068741	0.00068741	0.00566288	1945	tags=23%, list=14%, signal=20%	Tspan9/Dipk2a/Fyn/Ralb/Tlr4/Sema4d/Arhgef2/Rapgef2/Il6ra/Tnf/Tlr1/Cd24a/Insr/Bmp2/Ctnnd1/Enpp2/Sash1/Tgfb1/Ptprc/Slco3a1/Plcg2/Cd86/Adrb2/Bmp4/Rgcc/Pink1/Parp9/Fnip2/Cd40/Fgfr3/Dab2ip/Map2k6/Csf3/Cln3/Gprc5b/Pxn/Grk3/Rassf2/Flt4/Sema7a/Fgd2/Fzd4/P2rx7/Il15/Irgm2/Eng/Tcim/Nrp1/Syk/Pdgfd/Csf1r/Bmp6/Osm/Cd74/Tnfrsf11a/Prr5l/Yes1/Mmd/Plpp3/Aif1/Nod2/Agrn/Igtp/Atp2b4/Arrb1/Vegfc/Ceacam1/Lyn/Flt3l/Arhg…
GO:0031102	neuron projection regeneration	56	0.560207	1.82118	0.000689855	0.000689855	0.0056723	1020	tags=25%, list=7%, signal=23%	Nrg1/Tnc/Enpp1/Thy1/Ptn/Ptprs/Prrx1/Matn2/Neo1/Lrp1/Mmp2/Dhfr/Ptprf/Hgf
GO:0006986	response to unfolded protein	102	0.466096	1.65139	0.000691858	0.000691858	0.00567805	2293	tags=33%, list=17%, signal=28%	Thbs4/Comp/Thbs1/Creb3l3/Hspb8/Serp2/Manf/Serp1/Creb3l1/Selenos/Stc2/Hspa5/Tbl2/Dnajc3/Pdia6/Cdk5rap3/Erlec1/Hspd1/Derl2/Derl1/Parp8/Tmed2/Hsp90aa1/Creb3/Hsph1/Wfs1/Stt3b/Tmtc4/Tm7sf3/Tram1/Ptpn2/Dnajb9/Stub1/Casp12
GO:0095500	acetylcholine receptor signaling pathway	25	-0.689033	-1.90039	0.000696043	0.000696043	0.00570166	1741	tags=52%, list=13%, signal=46%	Chrnb1/Anxa7/Gnai2/Gnaq/Sorbs1/Ly6e/Orai1/Ly6a/Plcb1/Prkcb/Ly6c1/Sorbs2/Ly6g6d
GO:0006873	intracellular monoatomic ion homeostasis	385	-0.346075	-1.43201	0.000700711	0.000700711	0.00572913	2015	tags=22%, list=15%, signal=19%	Tcirg1/Slc4a8/Trpv4/Vps54/Cxcl10/Plcg1/Coro1a/Mcoln1/Abcb7/Tmem178/Vps33a/Wnk1/Atp6v0d2/Anxa7/Atox1/Slc39a10/Grina/Tgfb1/Atp6v0a1/Slc12a2/Ptprc/Plcg2/P2ry2/Atp1b3/Cd40/Dmd/Cln3/Slc31a2/Slc24a5/Steap4/Cyb561/Plcb4/Ccr5/Mapk3/P2rx7/Stc1/Gstm7/Cdh23/Hfe/Bmp6/Ccl8/B2m/Slc8b1/Pik3cb/Atp13a2/Itpr3/Ptpn6/Aplp2/Atp2b4/Chd7/Lyn/Gm6377/Cngb1/Plcb1/Tgm2/Tmc8/Inpp4b/Slc30a1/Cav2/Prnd/Prkcb/Apoe/Kcnq1/Ccr2/Sl…
GO:0061762	CAMKK-AMPK signaling cascade	11	-0.821572	-1.85859	0.000702103	0.000702103	0.00572976	936	tags=45%, list=7%, signal=42%	Irgm2/Igtp/Irgm1/Trem2/Kcnj8
GO:0030029	actin filament-based process	652	-0.308061	-1.336	0.000703491	0.000703491	0.00573035	2260	tags=24%, list=16%, signal=21%	Phactr4/Abr/Iqsec1/Casp4/Arpc3/Cyfip1/Cflar/Whamm/Fnbp1l/Rhog/Bcr/Mob2/Taok1/Ep300/Tmod3/Epb41/Neurl2/Nck2/Plec/Myo1g/Bbs4/Evl/Ppp1r9b/Ophn1/Fam171a1/Trpv4/Gpd1l/Pawr/Prex1/Arhgef2/Coro1a/Coro1b/Pdlim1/Cdc42bpb/Tnf/Tmsb4x/Alkbh4/Wasf2/Nckap1l/Kank1/Id1/Sptan1/Vasp/Nck1/Diaph2/Myo6/Tgfb1/Iqsec3/Hmcn1/Pde4b/Fhod1/Sorbs3/Tmod1/Synpo2/Micall2/Rgcc/Inpp5k/Mink1/Cd2ap/Rhpn2/Actn4/Mef2a/Celsr1/Tnfaip1/S…
GO:0032735	positive regulation of interleukin-12 production	33	-0.627301	-1.82636	0.000708278	0.000708278	0.00575858	1887	tags=45%, list=14%, signal=39%	Tlr4/Il16/Plcg2/Unc93b1/Cd40/Irf1/Tlr2/Syk/Nod2/Irf8/Laptm5/Plcb1/Tlr3/Cd36/Ccr7
GO:0016032	viral process	276	-0.365517	-1.46224	0.00071507	0.00071507	0.00580298	2294	tags=26%, list=17%, signal=22%	Tpcn1/Ddx3x/Zc3h12a/Dynlt1a/Ep300/Eif2ak2/Trim11/Tasor/Grk2/Chmp1b/Ciita/Tnf/Mid2/Sp1/Insr/Chmp2b/Ctsb/Ifi206/Apobec3/Ifitm1/Inpp5k/N4bp1/Oasl1/Trim12a/Gm11772/Adar/Ifitm3/Ifi207/Stom/Mvb12b/Adarb1/Rnasel/Ifih1/Mndal/Trim5/Hyal2/Bst2/Stat1/Trim56/Ly6e/Trim12c/Trim25/Nectin2/Oas2/Nrp1/Trim30d/Csf1r/Notch1/Ccl8/Cd74/Ifi209/Znfx1/Trim21/Oas1a/Trim34a/Oasl2/Sp100/Ifi203/Isg15/Trim6/Cxcr4/Map3k1/Trim3…
GO:0007266	Rho protein signal transduction	124	-0.442949	-1.61232	0.000721414	0.000721414	0.00583311	2166	tags=38%, list=16%, signal=32%	Rhog/Bcr/Ctnnal1/Ophn1/Srgap1/Gna12/Sema4d/Arhgef2/P2ry10b/Prag1/Kank1/Arhgef12/Cdc42se2/Heg1/Arhgdib/Celsr1/Tnfaip1/Kctd10/Ripor1/Plekhg5/Rhobtb1/Lpar4/Cdc42ep1/Cdc42ep3/Gpr65/Nrp1/Arhgef7/Cdc42ep2/Arrb1/Shtn1/Itga3/Eps8l2/Lpar6/Rasip1/Tek/Pecam1/Stard8/Apoe/Abca1/Arhgef3/Mcf2l/Cdh13/Adgrg1/F2rl3/Gpr4/F11r/Was
GO:0033260	nuclear DNA replication	33	0.626712	1.85915	0.00072146	0.00072146	0.00583311	2261	tags=61%, list=16%, signal=51%	Rad51/Cdc45/Fgfr1/Atad5/Gins3/Mcm4/Donson/Tk1/Mcm5/Lig1/Mcm7/Brca2/Mcm2/Mcm3/Mcm6/Pcna/Gins1/Cdc7/Cdt1/Pola1
GO:0060026	convergent extension	14	0.781352	1.89417	0.000729655	0.000729655	0.00588844	894	tags=43%, list=6%, signal=40%	Sfrp1/Sfrp2/Wnt5a/Wnt11/Ptk7/Nkd1
GO:0045776	negative regulation of blood pressure	35	-0.61327	-1.78755	0.000742038	0.000742038	0.00597731	2005	tags=46%, list=15%, signal=39%	Bbs4/Tnf/Rnpep/Adrb2/Apln/Ahr/Ptafr/Gch1/Vegfc/Prcp/Nos2/Agtr2/Nos3/Kdr/Gja5/Abcc9
GO:0032633	interleukin-4 production	34	-0.625344	-1.81712	0.000746672	0.000746672	0.00599248	2545	tags=56%, list=18%, signal=46%	Rara/Gata3/Fosl2/Sash3/H2-T22/Nlrp3/Il20rb/Zfpm1/Cd83/H2-K1/Syk/Notch1/H2-D1/Fcer1g/H2-Q4/H2-Q7/H2-Q6/H2-T23/Icosl
GO:0006813	potassium ion transport	127	-0.443105	-1.61609	0.000746672	0.000746672	0.00599248	1105	tags=23%, list=8%, signal=21%	P2ry12/Slc12a2/Gnaq/Adrb2/Atp1b3/Slc24a5/Klhl24/Plcb4/Slc12a6/Kcnj2/Slc12a7/Agrn/Kcnb1/Kcnq1/Slc12a5/Cav1/Atp1b2/Nos3/Trem2/Lrrc55/Kcna5/Gja5/Aqp1/Edn3/Atp1a2/Akap5/Abcc9/Casq2/Kcnj8
GO:1901739	regulation of myoblast fusion	20	-0.722741	-1.88317	0.000766017	0.000766017	0.00611796	2197	tags=60%, list=16%, signal=50%	Cxcl9/Cflar/Cxcl10/Cxcl12/Tmem182/Gdf15/Plekho1/Ccl8/Scgb3a1/Flt3l/Cd53/Ehd2
GO:1901342	regulation of vasculature development	255	-0.377908	-1.49696	0.000766441	0.000766441	0.00611796	1890	tags=35%, list=14%, signal=30%	Plcg1/Tspan18/Tnf/Foxc1/Lrg1/Sp1/Wnk1/Id1/Nras/Sash1/Tgfb1/Slc12a2/Adrb2/Rgcc/Angpt2/Ctnnb1/Il10/Cxcl12/Ago1/Erap1/Smad1/Cd40/Ecscr/Dab2ip/Hspb1/Gata2/Jcad/Stat1/Pxn/C5ar1/Tcf4/Adam10/Hoxa5/Glul/Ptprm/Eng/Nrp1/Itgb2/Ets1/Tjp1/Prkd2/Pik3cb/Epn2/Epha2/Atp2b4/Sh2b3/Vegfc/Vash1/Sp100/Ceacam1/Pparg/Il1b/Adamts9/Cd34/Cldn5/Pik3cg/Jup/Plxnd1/Col4a2/Sema6a/Flt1/Ramp2/Cxcr4/C3ar1/Stab1/Tek/Prkcb/Igf2/Cx3c…
GO:0007088	regulation of mitotic nuclear division	99	0.466733	1.64498	0.000766518	0.000766518	0.00611796	2079	tags=37%, list=15%, signal=32%	Obsl1/Knl1/Ube2c/Sphk1/Ttk/Pdxp/Spdl1/Spc25/Spc24/Birc5/Trip13/Igf1/Bub1/Ccdc8/Rcc1/Incenp/Cdca8/Aurkb/Plk1/Ndc80/Gen1/Cdca2/Zwilch/Nuf2/Klhl22/Cenpe/Mki67/Cdc16/Anapc15/Fbxo5/Zwint/Cdk5rap2/Tubg1/Cul7/Pebp1/Atm/Chek1
GO:0019731	antibacterial humoral response	27	-0.665919	-1.86468	0.000768936	0.000768936	0.00612603	978	tags=37%, list=7%, signal=34%	H2-K1/B2m/H2-D1/Nod2/Wfdc17/H2-Q4/H2-Q7/H2-Q6/H2-T23/Ighm
GO:0002027	regulation of heart rate	68	-0.518018	-1.74205	0.000770521	0.000770521	0.00612746	969	tags=26%, list=7%, signal=25%	Apln/Dmd/Ace/Kcnj2/Gch1/Jup/Kcnq1/Agtr2/Cav1/Epas1/Hrc/Slc1a1/Ednrb/Kcna5/Gja5/Edn3/Casq2/Kcnj8
GO:0032817	regulation of natural killer cell proliferation	16	-0.759644	-1.86612	0.000775183	0.000775183	0.00615331	2233	tags=75%, list=16%, signal=63%	Stat5b/Tyk2/Jak2/H2-T22/H2-K1/Il15/H2-D1/Flt3l/H2-Q4/H2-Q7/H2-Q6/H2-T23
GO:0034368	protein-lipid complex remodeling	14	-0.776732	-1.83573	0.000790356	0.000790356	0.00623779	1266	tags=50%, list=9%, signal=45%	Lpl/Pla2g7/Apoe/Abcg1/Gpihbp1/Pltp/Scarb1
GO:0034369	plasma lipoprotein particle remodeling	14	-0.776732	-1.83573	0.000790356	0.000790356	0.00623779	1266	tags=50%, list=9%, signal=45%	Lpl/Pla2g7/Apoe/Abcg1/Gpihbp1/Pltp/Scarb1
GO:0048701	embryonic cranial skeleton morphogenesis	42	0.596488	1.84933	0.000791469	0.000791469	0.00623779	1744	tags=40%, list=13%, signal=35%	Twist2/Prrx2/Twist1/Tbx15/Tgfb3/Prrx1/Six2/Gli3/Six1/Pdgfra/Tgfb2/Runx2/Mthfd1l/Mmp16/Gas1/Six4/Mmp14
GO:0140374	antiviral innate immune response	38	-0.599592	-1.79298	0.000791551	0.000791551	0.00623779	3470	tags=55%, list=25%, signal=41%	Oas1c/Dhx16/Rnf135/Traf6/Akap1/Morc3/Mavs/Traf3ip3/Nmb/Eif2ak2/Tbk1/Dhx58/Tnf/Nck1/Ifih1/Trim25/Ifit2/Oas1a/Trim6/Ifit3/Ifit3b
GO:0002440	production of molecular mediator of immune response	217	-0.377983	-1.47012	0.000796375	0.000796375	0.0062629	2369	tags=33%, list=17%, signal=28%	Casp1/Gata3/Crlf2/Xrcc4/Swap70/Casp4/Lilrb4a/Fosl2/Sash3/H2-T22/Tcirg1/Tlr7/Tlr4/Samhd1/Tnf/Cyren/Cd27/Nlrp3/Irf5/Tgfb1/Pou2f2/Ptprc/Plcg2/Cd86/Nod1/Cd37/Il10/Tnfrsf1b/Cd40/Kmt5b/Gprc5b/Tlr2/Bst2/Jak3/Nipal3/Sema7a/Pkn1/P2rx7/H2-K1/Il27ra/Hfe/Syk/B2m/H2-D1/Cd74/Tnfsf13/H2-Ab1/Fcer1g/Il7r/Nod2/Laptm5/Il1b/Fcgr2b/Trim6/Tek/Vsir/H2-Q4/Nepn/Tlr3/H2-Q7/Ccr2/Cd36/Slc11a1/Kit/Gimap5/H2-Q6/H2-T23/Icosl/S…
GO:0001787	natural killer cell proliferation	18	-0.728676	-1.85417	0.000797612	0.000797612	0.0062629	2233	tags=67%, list=16%, signal=56%	Stat5b/Tyk2/Jak2/H2-T22/H2-K1/Il15/H2-D1/Flt3l/H2-Q4/H2-Q7/H2-Q6/H2-T23
GO:0071542	dopaminergic neuron differentiation	25	0.688784	1.93992	0.000801342	0.000801342	0.00628087	2450	tags=60%, list=18%, signal=49%	Sfrp1/Sfrp2/Lmx1b/Vegfd/En1/Wnt5a/Tiam1/Manf/Vegfa/Ryk/Smo/Rspo2/Tshr/Nr4a2/Hif1a
GO:0018158	protein oxidation	13	0.783584	1.86531	0.000804138	0.000804138	0.00629147	308	tags=31%, list=2%, signal=30%	Lox/Loxl3/Loxl1/Loxl2
GO:2000241	regulation of reproductive process	133	0.441355	1.62619	0.00081103	0.00081103	0.00633225	2072	tags=30%, list=15%, signal=26%	Timp1/Sfrp1/Rbm46/Serpinf1/Lif/Drd4/Fbn2/Cyp51/Nupr1/Knl1/Runx1/Wnt5a/Ttk/Inhba/Zfpm2/Aspm/Trip13/Igf1/Sulf1/Rnase10/Pkmyt1/Cdc25c/Vegfa/Sox9/Unc5c/Fanca/Calr/Prdx4/Fbxo5/Rad51ap1/Zwint/Plat/Src/Snai1/Ada/Ar/Eaf2/Grb14/Cited2/Ooep
GO:0090178	regulation of establishment of planar polarity involved in neural tube closure	14	0.77894	1.88833	0.000812256	0.000812256	0.00633225	807	tags=43%, list=6%, signal=40%	Sfrp1/Sfrp2/Fzd2/Wnt5a/Fzd1/Ptk7
GO:0036230	granulocyte activation	34	-0.620721	-1.80369	0.000819076	0.000819076	0.00637401	2252	tags=53%, list=16%, signal=44%	Abr/Bcr/Kmt2e/Tnf/Il16/Plpp6/Myo1f/Enpp3/Il15/Itgb2/Syk/Ptafr/Spi1/Fcer1g/Tyrobp/Cd300a/Ccr2/Fcgr4
GO:0086003	cardiac muscle cell contraction	49	-0.563424	-1.77638	0.000845521	0.000845521	0.00656808	970	tags=24%, list=7%, signal=23%	Stc1/Cacna1h/Kcnj2/Jup/Kcnq1/Cav1/Kcna5/Gja5/Atp1a2/Abcc9/Casq2/Kcnj8
GO:0010324	membrane invagination	62	-0.528821	-1.7577	0.000856925	0.000856925	0.00664482	1724	tags=42%, list=13%, signal=37%	Becn1/Fnbp1l/Bin2/Alkbh4/Nckap1l/Plcg2/Stap1/Fcho2/Clcn3/Gata2/Msr1/Itgb2/Abca7/Fcgr3/Aif1/Fcer1g/Elmo1/Pparg/Cd300a/Fcgr2b/Abca1/Itga2/Cd36/Fcgr1/Trem2/Arhgap25
GO:0015748	organophosphate ester transport	94	-0.476271	-1.65514	0.000878608	0.000878608	0.00680086	1811	tags=33%, list=13%, signal=29%	Atp8a2/Osbpl8/Slc37a2/Abcb4/Xrcc4/Tmem30a/Epg5/Lrrc8b/Atp9a/Lrrc8a/Plscr4/Pctp/Abcc4/Atp8a1/Gja1/P2rx7/Atp11c/Abca7/Abcb1b/Pitpnm2/Lrrc8c/Apoe/Abcg1/Abca1/Apoc2/Abca3/Pitpnc1/Pltp/Scarb1/Pitpnm3/Abcb1a
GO:0032957	inositol trisphosphate metabolic process	15	-0.763612	-1.84846	0.00088301	0.00088301	0.00682281	1904	tags=53%, list=14%, signal=46%	Ipmk/Plcg1/Itpk1/Plcg2/P2ry6/Itpkb/Ptafr/Plcb1
GO:0019079	viral genome replication	112	-0.455467	-1.62513	0.00089697	0.00089697	0.00691841	1538	tags=32%, list=11%, signal=29%	Ddx3x/Zc3h12a/Eif2ak2/Tasor/Grk2/Tnf/Ifi206/Apobec3/Ifitm1/Inpp5k/N4bp1/Oasl1/Gm11772/Adar/Ifitm3/Ifi207/Stom/Adarb1/Rnasel/Ifih1/Mndal/Bst2/Oas2/Notch1/Ccl8/Ifi209/Znfx1/Oas1a/Oasl2/Ifi203/Isg15/Trim6/Nr5a2/Ifi213/Rsad2/Ifi208
GO:0006898	receptor-mediated endocytosis	214	-0.385305	-1.49626	0.000905793	0.000905793	0.00697411	1913	tags=30%, list=14%, signal=27%	Ralb/Grk2/Dgkd/Ldlrap1/Inpp5f/Cbl/Hspg2/Ankrd13a/Ston1/Insr/Micall1/Myo6/Sdcbp/Sgip1/Rin3/Plcg2/Pip5k1c/Adrb2/Lmbrd1/Sorl1/Cd2ap/Cd9/Fcho2/Ackr3/Apln/Ifitm3/Sele/Cln3/Itsn2/Grk3/Dnm3/Hip1/Efnb2/Msr1/Cd14/Clu/Hip1r/Itgb2/Hfe/Syk/B2m/Calcrl/Mrc1/Fcer1g/Arrb1/Ceacam1/Cd300a/Fcgr2b/Ramp2/Cav2/Neu3/Itga4/Apoe/Apoc2/Dll1/Cd36/Fcgr1/Cav1/Vtn/Ntf3/Arhgap27/Ramp3/Fcgr4/Ccr7/Akap5
GO:0002181	cytoplasmic translation	141	0.427877	1.58436	0.000909607	0.000909607	0.00699113	5286	tags=58%, list=38%, signal=36%	Rpl39l/Rpl22l1/Pkm/Rpsa/Ncbp2/Rps2/Zfp385a/Rplp0/Rpl10a/Eif4ebp1/Slbp/Rpl14/Rpl41/Eif3i/Rpl11/Rps3a1/Rps5/Rpl12/Denr/Rpl13/Zc3h15/Rpl36al/Cpeb1/Rps3/Etf1/Rps20/Rpl8/Rps12/Rps13/Rpl3/Rpl19/Rps4x/Rpl31/Rps10/Rpl18/Rpl15/Rps7/Eif2b3/Rps9/Hnrnpu/Impact/Rps15a/Rps8/Rps27a/Syncrip/Rpl28/Rpl32/Rps18/Rplp1/Rpl7a/Rps24/Hnrnpd/Rpl4/Ncbp1/Rpl18a/Rps19/Eif3d/Rpl24/Rpl27a/Rps16/Eif3a/Dhx29/Rpl7/Rpl6/Rpl27/Rpl…
GO:0046632	alpha-beta T cell differentiation	105	-0.459693	-1.63925	0.000916811	0.000916811	0.00703409	2776	tags=35%, list=20%, signal=28%	Bcl2/Tmem98/Bcl3/Batf/Rara/Gata3/Zc3h12a/Rc3h1/Lilrb4a/Gpr183/Runx3/Fosl2/Sash3/Il6ra/Nckap1l/Psap/Nlrp3/Tgfb1/Irf1/Jak3/Pf4/Sh3rf1/Cd83/Nfkbid/Syk/Itpkb/Igtp/Ly9/Hlx/Il2rg/Ccr2/Prdm1/Gimap5/Zbtb16/Gimap1/Rsad2/Ccr7
GO:0042698	ovulation cycle	45	0.571928	1.80539	0.000922599	0.000922599	0.00706606	1094	tags=31%, list=8%, signal=29%	Ptx3/Bmpr1b/Tnfaip6/Pla2g4a/Tyro3/Mdk/Runx1/Inhba/Ptn/Egfr/Ptprn/Pdgfra/Gas2/Axl
GO:0033044	regulation of chromosome organization	228	0.378593	1.47804	0.000927835	0.000927835	0.0070937	2992	tags=31%, list=22%, signal=25%	Knl1/Ube2c/Ttk/Nek2/Top2a/Spdl1/Spc25/Spc24/Birc5/Trip13/Bub1/Ncapg/Cdk1/Incenp/Tacc3/Cdca8/Aurkb/Plk1/Fen1/Recql4/Ndc80/Gen1/Wdhd1/Bcl7c/Xrcc5/Zwilch/Smc2/Nuf2/Klhl22/Cenpe/Nek6/Smarcc1/Mcm2/Cdc16/Anapc15/Dpf1/Mcph1/Fbxo5/Zwint/Src/Cdk5rap2/Gnl3/Cdc6/Ncaph/Smc4/Rmi2/Phf10/Atm/Myc/Sgo2a/Mad2l1/Slf1/Xrcc1/Rad50/Haspin/Kntc1/Tinf2/Uchl5/Bcl7a/Setdb1/Cenpv/Nsmce2/Lmna/Trim28/Ruvbl1/Anapc11/Baz1b/Cdc…
GO:0002700	regulation of production of molecular mediator of immune response	162	-0.413664	-1.56941	0.000933118	0.000933118	0.00712159	1645	tags=30%, list=12%, signal=26%	Cd27/Nlrp3/Irf5/Tgfb1/Ptprc/Plcg2/Cd86/Nod1/Cd37/Il10/Tnfrsf1b/Cd40/Kmt5b/Gprc5b/Tlr2/Bst2/Jak3/Sema7a/Pkn1/P2rx7/H2-K1/Il27ra/Hfe/Syk/B2m/H2-D1/Cd74/Tnfsf13/Fcer1g/Nod2/Laptm5/Il1b/Fcgr2b/Trim6/Tek/Vsir/H2-Q4/Nepn/Tlr3/H2-Q7/Ccr2/Cd36/Kit/Gimap5/H2-Q6/H2-T23/Rsad2/Ighm
GO:0001885	endothelial cell development	63	-0.520627	-1.73282	0.000950569	0.000950569	0.00724209	2763	tags=54%, list=20%, signal=43%	Zdhhc21/Rdx/Icam1/Rap1a/Met/Myadm/Tjp2/Clic4/Msn/Rapgef2/Tnf/Id1/Heg1/Dmd/Ikbkb/Rapgef1/Col18a1/Stc1/Tjp1/Abcb1b/Il1b/Afdn/Plcb1/Cldn5/Robo4/Pecam1/Rapgef3/Notch4/Pde2a/Ppp1r16b/Cdh5/F11r/Ednrb/Sox18
GO:0002477	antigen processing and presentation of exogenous peptide antigen via MHC class Ib	11	-0.815092	-1.84393	0.000955375	0.000955375	0.00726601	2020	tags=82%, list=15%, signal=70%	H2-T22/Tap2/H2-K1/B2m/H2-D1/H2-Q4/H2-Q7/H2-Q6/H2-T23
GO:0007095	mitotic G2 DNA damage checkpoint signaling	38	0.604452	1.83961	0.00095967	0.00095967	0.00728596	2116	tags=42%, list=15%, signal=36%	Clspn/Brca1/Dtl/Ticrr/Blm/Creb3l1/Cdk1/Plk1/Donson/Cdk5rap3/Brsk1/Ier3/Rint1/Atm/Chek1/Topbp1
GO:0002507	tolerance induction	26	-0.665073	-1.85147	0.000967356	0.000967356	0.00732622	2381	tags=58%, list=17%, signal=48%	Il2ra/Lilrb4a/H2-T22/Tgfb1/Cd86/H2-K1/H2-D1/Lyn/C3ar1/H2-Q4/H2-Q7/H2-Q6/H2-T23/Cd274/Ccr7
GO:0016049	cell growth	422	0.329909	1.38477	0.000968336	0.000968336	0.00732622	1619	tags=18%, list=12%, signal=16%	Plaat1/Slit2/Ccn5/Sfrp1/Nrg1/Sfrp2/Ccn4/Tnc/Cgref1/P3h1/Dclk1/Tro/Ccn3/Ndn/Brca1/Sema3c/Slit3/Crabp2/Tnn/Enpp1/S100b/Fn1/Wnt5a/Postn/Wnt11/Dcbld2/Avpr1a/Sphk1/Kif14/Col14a1/Inhba/Fdps/Ptprs/Tiam1/Sema6c/Lrp1/Dnph1/Tnfrsf12a/Egfr/Igf1/Dbn1/Robo1/Arhgap32/Igfbp4/Pak1/Dact3/Cryab/Nfix/Prr5/Eno1/Sema5a/Vegfa/Sox9/Serpine2/Cd44/St8sia2/Ryk/Cdkn2a/Tgfb2/Fxn/Slc25a4/Sec61a1/Klhl22/Tead1/Meis1/Ext1/Gas1/…
GO:0002063	chondrocyte development	29	0.670781	1.93486	0.000975532	0.000975532	0.00736107	2040	tags=55%, list=15%, signal=47%	Sfrp2/Comp/Col11a1/Shox2/Col27a1/Acan/Sulf2/Sulf1/Sox9/Serpinh1/Mia3/Runx2/Ext1/Fgf18/Chsy1/Ecm1
GO:0048878	chemical homeostasis	740	-0.301371	-1.31108	0.00097632	0.00097632	0.00736107	2021	tags=21%, list=15%, signal=19%	Abcd1/Tcirg1/Rab11b/Slc4a8/Trim24/Ctns/Trpv4/Vps54/Cxcl10/Rab11fip5/Acox1/Grk2/Plcg1/Coro1a/Ldlrap1/Mcoln1/Abcb7/Tmem178/Vps33a/Cd24a/Wnk1/Atp6v0d2/Insr/Anxa7/Atox1/Slc39a10/Igfbp5/Grina/Lrrc8d/Tgfb1/Atp6v0a1/Slc12a2/Ptprc/Plcg2/Lipa/Klf7/Inpp5k/P2ry2/Atp1b3/Cd40/Fgfr3/Lpl/Bloc1s6/Dmd/Cln3/Lrp5/Gprc5b/Hyal2/Tmtc2/Klhl3/Ptch1/Slc31a2/Foxo1/Ucp2/Enpp3/Slc24a5/Steap4/Cyb561/Hmga1/Mylip/Plcb4/Gramd1b…
GO:0030100	regulation of endocytosis	267	-0.364863	-1.45476	0.000988348	0.000988348	0.00743889	2586	tags=36%, list=19%, signal=29%	Rap1a/Mtmr2/Dgkq/Sirpb1c/Mkln1/Napb/Hap1/Synj1/Nedd4l/Ptk2/Vac14/Dab2/Abr/Iqsec1/Nr1h2/Pld2/Cfp/Rubcn/Bcr/Lgals3/Numb/Ophn1/Rab27a/Dgkd/Ldlrap1/Cbl/Ankrd13a/Ston1/Insr/Nckap1l/Rab5b/Tgfb1/Sdcbp/Ptprc/Rin3/Plcg2/Pip5k1c/Rab5c/Stap1/Cd2ap/Actn4/Apln/Sele/Dcx/Cln3/Gata2/Tlr2/Mertk/Bcl2l1/Rapgef1/Hip1/Efnb2/Cd14/Il15/Clu/Hip1r/Hfe/Dock2/Syk/B2m/Dysf/Abca7/Epn2/Mctp1/Myo18a/Fcgr3/Fcer1g/Nod2/Arrb1/Syt…
GO:0032649	regulation of type II interferon production	84	-0.490741	-1.69481	0.000999994	0.000999994	0.00751357	2219	tags=43%, list=16%, signal=36%	Zc3h12a/Lilrb4a/Tyk2/Jak2/Sash3/Tlr7/Tlr4/Tnf/Nras/Cd27/Lgals9/Pde4b/Il10/Il20rb/Zfpm1/H2-K1/Cd14/Il27ra/H2-D1/Nod2/Irf8/Pglyrp1/Isg15/Laptm5/Il1b/Vsir/H2-Q4/Tlr3/H2-Q7/Ccr2/Irgm1/Slc11a1/Gimap5/H2-Q6/Cd274/Ccr7
GO:0170033	L-amino acid metabolic process	106	0.4534	1.61601	0.00100696	0.00100696	0.00755286	2242	tags=33%, list=16%, signal=28%	P4ha3/Phgdh/Ddah1/Plod2/Gfpt2/P4ha2/Ass1/Pycr1/P4ha1/Gcat/Sdsl/Aldh18a1/Dhfr/P4hb/Gfpt1/Egln3/Crtap/Gls2/Oat/Cad/Prdx4/Plod3/Psat1/Mri1/Mthfd1/Gcsh/Gstz1/Ahcy/Gpt2/Shmt2/Mtap/Gart/Fpgs/Gmps/Pemt
GO:0045143	homologous chromosome segregation	39	0.601144	1.84519	0.00101563	0.00101563	0.0076048	2913	tags=51%, list=21%, signal=41%	Knl1/4930447C04Rik/Ccne2/Ccne1/Trip13/Brip1/Psmc3ip/Plk1/Brca2/Ndc1/Espl1/Zwint/Fancd2/Syce2/Atm/Zcwpw1/Haspin/Mlh1/Syde1/Cpeb1
GO:0070269	pyroptosis	25	-0.676393	-1.86553	0.00102943	0.00102943	0.00769493	2900	tags=52%, list=21%, signal=41%	Map3k20/Gsdmd/Casp1/Casp4/Casp8/Nlrp3/Trim21/Naip2/Gbp2/Gbp3/Aim2/Gbp5/Trem2
GO:2000106	regulation of leukocyte apoptotic process	88	-0.484915	-1.68614	0.00103141	0.00103141	0.00769653	2118	tags=41%, list=15%, signal=35%	Lgals3/Dock8/Adam17/Casp8/Adam8/Rapgef2/Cd24a/Slc39a10/Cd27/Bmp4/Il10/Cxcl12/St6gal1/Mertk/Jak3/Bcl2l1/Ccr5/Nfkbid/P2rx7/Tsc22d3/Cd74/Prkd2/Pik3cb/Itpkb/Fcer1g/Il7r/Nod2/Lyn/Fcgr2b/Mef2c/Kitl/Gimap8/Hcls1/Efna1/Cd274/Ccr7
GO:0030003	intracellular monoatomic cation homeostasis	377	-0.340991	-1.40581	0.00105284	0.00105284	0.00784029	2015	tags=22%, list=15%, signal=19%	Tcirg1/Slc4a8/Trpv4/Vps54/Cxcl10/Plcg1/Coro1a/Mcoln1/Abcb7/Tmem178/Vps33a/Atp6v0d2/Anxa7/Atox1/Slc39a10/Grina/Tgfb1/Atp6v0a1/Slc12a2/Ptprc/Plcg2/P2ry2/Atp1b3/Cd40/Dmd/Cln3/Slc31a2/Slc24a5/Steap4/Cyb561/Plcb4/Ccr5/Mapk3/P2rx7/Stc1/Gstm7/Cdh23/Hfe/Bmp6/Ccl8/B2m/Slc8b1/Pik3cb/Atp13a2/Itpr3/Ptpn6/Aplp2/Atp2b4/Chd7/Lyn/Gm6377/Cngb1/Plcb1/Tgm2/Tmc8/Inpp4b/Slc30a1/Cav2/Prnd/Prkcb/Apoe/Ccr2/Slc12a5/Slc11…
GO:0001736	establishment of planar polarity	34	0.628784	1.87697	0.00105856	0.00105856	0.00784029	1513	tags=35%, list=11%, signal=31%	Sfrp1/Sfrp2/Cthrc1/Fzd2/Wnt5a/Fzd1/Ptk7/Fzd3/Ift20/Dlg3/Alms1/Brsk1
GO:0007164	establishment of tissue polarity	34	0.628784	1.87697	0.00105856	0.00105856	0.00784029	1513	tags=35%, list=11%, signal=31%	Sfrp1/Sfrp2/Cthrc1/Fzd2/Wnt5a/Fzd1/Ptk7/Fzd3/Ift20/Dlg3/Alms1/Brsk1
GO:0035150	regulation of tube size	132	-0.435311	-1.58796	0.00106147	0.00106147	0.00784029	1476	tags=27%, list=11%, signal=25%	Adrb2/P2ry2/Rgs2/Apln/Itga9/Bloc1s6/Adora2a/Gja1/Ace/Dock4/Ptprm/Itga1/Ece1/Ahr/Gch1/Mgll/Ptgs1/Itga4/Apoe/Pdgfb/Cysltr1/Agtr2/Cav1/Npr1/Nos3/Kdr/Ednrb/Kcna5/Gja5/Cd38/Edn3/Gucy1a1/Tbxas1/Atp1a2/Chga/Kcnj8
GO:0035296	regulation of tube diameter	132	-0.435311	-1.58796	0.00106147	0.00106147	0.00784029	1476	tags=27%, list=11%, signal=25%	Adrb2/P2ry2/Rgs2/Apln/Itga9/Bloc1s6/Adora2a/Gja1/Ace/Dock4/Ptprm/Itga1/Ece1/Ahr/Gch1/Mgll/Ptgs1/Itga4/Apoe/Pdgfb/Cysltr1/Agtr2/Cav1/Npr1/Nos3/Kdr/Ednrb/Kcna5/Gja5/Cd38/Edn3/Gucy1a1/Tbxas1/Atp1a2/Chga/Kcnj8
GO:0097746	blood vessel diameter maintenance	132	-0.435311	-1.58796	0.00106147	0.00106147	0.00784029	1476	tags=27%, list=11%, signal=25%	Adrb2/P2ry2/Rgs2/Apln/Itga9/Bloc1s6/Adora2a/Gja1/Ace/Dock4/Ptprm/Itga1/Ece1/Ahr/Gch1/Mgll/Ptgs1/Itga4/Apoe/Pdgfb/Cysltr1/Agtr2/Cav1/Npr1/Nos3/Kdr/Ednrb/Kcna5/Gja5/Cd38/Edn3/Gucy1a1/Tbxas1/Atp1a2/Chga/Kcnj8
GO:0051231	spindle elongation	12	0.802796	1.87678	0.0010645	0.0010645	0.00784934	1508	tags=67%, list=11%, signal=59%	Prc1/Birc5/Kif11/Incenp/Cdca8/Aurkb/Kif4/Racgap1
GO:0051050	positive regulation of transport	723	-0.299742	-1.30361	0.00106714	0.00106714	0.00785551	2276	tags=26%, list=17%, signal=23%	Nrde2/Dab2/Stxbp2/Abr/Nr1h2/Pld2/Cnst/Zc3h12a/Cfp/Frmd4a/Jak2/Bcr/Tmem30a/Lgals3/Arl6ip1/Ep300/Akt3/Adipor2/Acsl5/Slc4a8/Msn/Nr3c1/Crebl2/Cxcl10/Gpd1l/Rab8b/Dennd5b/Grk2/Plcg1/Tlr4/Rab27a/Dgkd/Ldlrap1/Stxbp5/Tnf/Sfn/Cbl/Wnk1/Insr/Nckap1l/Bmp2/Anxa7/Dpysl2/Oaz2/Chchd10/P2ry12/Stac/Tgfb1/Sdcbp/Slc12a2/Ptprc/Gnaq/Plcg2/Adrb2/Bmp4/Rgcc/Stap1/Pink1/Inpp5k/Sorl1/Cd2ap/P2ry2/Cxcl12/Actn4/Atp1b3/Apln/Myl…
GO:0086009	membrane repolarization	31	-0.641395	-1.83449	0.00108222	0.00108222	0.00794792	1046	tags=32%, list=8%, signal=30%	Atp1b3/Gja1/Kcnj2/Kcnq1/Cav1/Atp1b2/Kcna5/Gja5/Casq2/Kcnj8
GO:0002724	regulation of T cell cytokine production	33	-0.614023	-1.78771	0.00108334	0.00108334	0.00794792	2360	tags=64%, list=17%, signal=53%	Malt1/Cd55/Traf6/Arid5a/Cd81/Gata3/Lilrb4a/Sash3/Nlrp3/Tnfrsf1b/H2-K1/Hfe/B2m/H2-D1/Il1b/Vsir/H2-Q4/H2-Q7/Ccr2/H2-Q6/Rsad2
GO:0090092	regulation of transmembrane receptor protein serine/threonine kinase signaling pathway	204	0.382869	1.47357	0.00108569	0.00108569	0.00795183	921	tags=16%, list=7%, signal=15%	Grem2/Sfrp1/Fst/Lox/Sfrp2/Cdh3/Cilp/Fbn2/Thbs1/Cdkn2b/Bmper/Fbn1/Ccn3/Tnfaip6/Vasn/Adamtsl2/Wnt5a/Tgfb3/Inhba/Aspn/Emilin1/Fstl1/Bmpr1a/Neo1/Lrp1/Fzd1/Lefty1/Pmepa1/Sulf1/Magi2/Hspa5/Tmem53
GO:1901135	carbohydrate derivative metabolic process	793	0.294203	1.28084	0.0010879	0.0010879	0.00795459	2545	tags=26%, list=18%, signal=22%	Galnt17/Ak5/Cemip/Col11a1/Ptx3/Ak4/Has1/Cmah/Il33/Ak1/Fbxo27/Galnt16/B3gnt9/Gfpt2/Tnfaip6/Nupr1/Has2/Rrm2/Enpp1/Mgat3/Col6a1/B4galnt1/Mlec/Fbxo17/Hk2/Gmppb/Pmm1/Acot11/Chpf/Galnt5/Angpt1/Gk5/Dnph1/Pgm3/Acan/Igf1/Ugdh/Fgf2/Ostc/Gmds/Hmmr/Tpi1/Sulf2/Sulf1/Rhoq/Chst10/Pdk3/Galk1/Pgk1/Chsy3/Pxylp1/Adcy2/Csgalnact1/Nme2/Pgam1/H6pd/Gnpnat1/Rrm1/Adcy7/Dse/Chst2/Nme4/Dcakd/Fasn/Dsel/Ugp2/Aldh1a1/Ddost/En…
GO:0048598	embryonic morphogenesis	492	0.324866	1.37358	0.00110874	0.00110874	0.00808844	1746	tags=21%, list=13%, signal=19%	Grem2/Rbp4/Twist2/Gjb5/Sfrp1/Mfap5/Sfrp2/Cthrc1/Prrx2/Aldh1a3/Aldh1a2/Col11a1/Lmx1b/Twist1/Osr1/Fbn2/Scx/Ephb2/Rspo3/Lrig3/Col12a1/Fzd2/Col5a1/Shox2/Eya4/Crabp2/Stil/Enpp1/En1/Pitx1/Mfap2/Fn1/Col5a2/Wnt5a/Tbx15/Tgfb3/Wnt11/Ror2/Inhba/Alx4/Bmpr1a/Prrx1/Wnt9a/Mab21l2/Dact1/Fzd1/Hoxc10/Fgfr1/Lefty1/Irx3/Sobp/Ugdh/Sulf1/Tbx18/Fzd5/Aff3/Osr2/Ttc39c/Ptk7/Six2/Gli3/Fzd3/Kif20b/Hoxc9/Aldh1a1/Gbx2/Lrig1/S…
GO:0002369	T cell cytokine production	40	-0.601228	-1.80845	0.00110991	0.00110991	0.00808844	2360	tags=48%, list=17%, signal=39%	Gata3/Crlf2/Lilrb4a/Fosl2/Sash3/Nlrp3/Tnfrsf1b/H2-K1/Hfe/B2m/H2-D1/Il1b/Vsir/H2-Q4/H2-Q7/Ccr2/Slc11a1/H2-Q6/Rsad2
GO:0099024	plasma membrane invagination	54	-0.549897	-1.75882	0.00111263	0.00111263	0.00809334	1724	tags=41%, list=13%, signal=36%	Alkbh4/Nckap1l/Plcg2/Stap1/Clcn3/Gata2/Msr1/Itgb2/Abca7/Fcgr3/Aif1/Fcer1g/Elmo1/Pparg/Cd300a/Fcgr2b/Abca1/Itga2/Cd36/Fcgr1/Trem2/Arhgap25
GO:0071887	leukocyte apoptotic process	112	-0.451866	-1.61228	0.0011143	0.0011143	0.00809334	2148	tags=37%, list=16%, signal=31%	Plekho2/Lgals3/Dock8/Adam17/Casp8/Adam8/Rapgef2/Casp7/Cd24a/Slc39a10/Cd27/Lipa/Bmp4/Il10/Cxcl12/St6gal1/Mertk/Jak3/Bcl2l1/Pkn1/Ccr5/Nfkbid/P2rx7/Tsc22d3/Cd74/Prkd2/Pik3cb/Itpkb/Fcer1g/Il7r/Nod2/Lyn/Fcgr2b/Mef2c/Kitl/Gimap8/Tnfrsf21/Hcls1/Efna1/Cd274/Ccr7
GO:0071706	tumor necrosis factor superfamily cytokine production	169	-0.409713	-1.55803	0.00111651	0.00111651	0.00809588	2910	tags=43%, list=21%, signal=34%	Cd47/Akap8/Ptpn22/Arid5a/Lrrk2/Arrb2/Cyp2j6/Tirap/Bcl3/Zfp36/Nfkbil1/Gpnmb/Mavs/Rara/Zbtb20/Frmd8/Zc3h12a/Tmem106a/Lilrb4a/Jak2/Sash3/Adam8/H2-T22/Tlr4/Arhgef2/Tlr1/Cd24a/Ly96/Lgals9/Ccl3/Tgfb1/Ptprc/Plcg2/Nod1/Il10/Ifngr1/Hspb1/Lpl/Ifih1/Tlr2/Ccr5/Oas2/H2-K1/Cd14/Il27ra/Clu/Syk/Csf1r/H2-D1/Ptafr/Fcgr3/Fcer1g/Nod2/Ptpn6/Oas1a/Tyrobp/Fcgr2b/Cd84/Trim30a/Vsir/H2-Q4/Cx3cr1/Tlr3/H2-Q7/Ccr2/Cd36/H2-Q6…
GO:2001257	regulation of cation channel activity	76	-0.498898	-1.69384	0.00112354	0.00112354	0.00813332	1592	tags=22%, list=12%, signal=20%	Stac/Plcg2/Dmd/Ikbkb/Klhl24/Ehd3/Gstm7/Dysf/Ctss/Kcnq1/Cav1/Hrc/Trem2/Lrrc55/Abcc9/Casq2/Kcnj8
GO:0097696	receptor signaling pathway via STAT	122	-0.440013	-1.59526	0.00112574	0.00112574	0.00813578	2373	tags=36%, list=17%, signal=30%	Gadd45a/Crlf2/Lck/Stat5b/Adipor1/Tyk2/Jak2/Ep300/Ret/Mgat5/Fyn/Il6ra/Tnf/Inpp5f/Socs3/Tgfb1/Ptprc/Parp9/Il10/Cd40/Fgfr3/Irf1/Stat1/Jak3/Stat2/Nlk/Il15/Csf1r/Notch1/Osm/Il10ra/Il10rb/Il7r/Sh2b3/Lyn/Pparg/Cd300a/Csf2rb2/Pecam1/Parp14/Cav1/Kit/Hcls1/Csf2rb
GO:0098581	detection of external biotic stimulus	25	-0.673754	-1.85825	0.00113501	0.00113501	0.00818916	2437	tags=68%, list=18%, signal=56%	Clec4n/Casp4/Tlr4/Tlr1/Ly96/Nod1/Tlr2/H2-K1/H2-D1/Nod2/Naip2/Pglyrp1/H2-Q4/H2-Q7/H2-Q6/Trem2/Scarb1
GO:0006935	chemotaxis	328	-0.348315	-1.418	0.00115304	0.00115304	0.00829179	2174	tags=37%, list=16%, signal=32%	Gpr183/Rhog/Bin2/Lgals3/Dusp1/Adam17/Adam8/Plec/Mpp1/Trpv4/Mtus1/Cxcl10/Prex1/Sema4d/Coro1a/Coro1b/Akirin1/Ptpro/Lect2/Csf3r/Wnk1/Nckap1l/Enpp2/Lgals9/Ccl12/Il16/P2ry12/Ccl3/Tgfb1/Mospd2/Slc12a2/Pde4b/Rin3/Pip5k1c/Stap1/Angpt2/Cxcl12/Ackr3/Itga9/St6gal1/Dapk2/Ecscr/Hspb1/Sema4c/Ccrl2/Plekhg5/C5ar1/Pf4/Adam10/Sema7a/Ccr5/Mapk3/Efnb2/Dock4/Dusp3/Eng/Nrp1/Ccl9/Nrp2/Itgb2/Dock2/Syk/Pdgfd/Sema3g/Csf1r…
GO:0042330	taxis	328	-0.348315	-1.418	0.00115304	0.00115304	0.00829179	2174	tags=37%, list=16%, signal=32%	Gpr183/Rhog/Bin2/Lgals3/Dusp1/Adam17/Adam8/Plec/Mpp1/Trpv4/Mtus1/Cxcl10/Prex1/Sema4d/Coro1a/Coro1b/Akirin1/Ptpro/Lect2/Csf3r/Wnk1/Nckap1l/Enpp2/Lgals9/Ccl12/Il16/P2ry12/Ccl3/Tgfb1/Mospd2/Slc12a2/Pde4b/Rin3/Pip5k1c/Stap1/Angpt2/Cxcl12/Ackr3/Itga9/St6gal1/Dapk2/Ecscr/Hspb1/Sema4c/Ccrl2/Plekhg5/C5ar1/Pf4/Adam10/Sema7a/Ccr5/Mapk3/Efnb2/Dock4/Dusp3/Eng/Nrp1/Ccl9/Nrp2/Itgb2/Dock2/Syk/Pdgfd/Sema3g/Csf1r…
GO:0034508	centromere complex assembly	27	0.65589	1.86253	0.00116283	0.00116283	0.0083484	2940	tags=63%, list=21%, signal=50%	Cenph/Cenpk/Cenpn/Cenpw/Cenpi/Dlgap5/Nasp/Cenpe/Hjurp/Oip5/Cenpp/Mis12/Itgb3bp/Kntc1/Cenpv/Cenpx/Cenpo
GO:0050900	leukocyte migration	299	-0.360984	-1.45143	0.00116495	0.00116495	0.00834989	2252	tags=36%, list=16%, signal=31%	Abr/Stat5b/Irak4/Gpr183/Bcr/Lgals3/Dock8/Dusp1/Adam17/Adam8/Plec/Myo1g/Msn/Mpp1/Trpv4/Mtus1/Cxcl10/Pawr/Prex1/Coro1a/Akirin1/Ptpro/Tnf/Cd24a/Csf3r/Wnk1/Nckap1l/Lgals9/Ccl12/Il16/P2ry12/Ccl3/Tgfb1/Mospd2/Slc12a2/Pde4b/Rin3/Stap1/Cxcl12/Cd9/Itga9/Dapk2/Hoxa7/Sele/Tlr2/Myo1f/C5ar1/Selplg/Pf4/Adam10/Mapk3/Il27ra/Ccl9/Itgb2/Syk/Pdgfd/Csf1r/Ccl8/Itga1/Dysf/Cd74/Slc8b1/Rac2/Ptafr/Fcgr3/Aif1/Spi1/Fcer1g/…
GO:0045954	positive regulation of natural killer cell mediated cytotoxicity	22	-0.680746	-1.79775	0.001181	0.001181	0.00845102	1042	tags=45%, list=8%, signal=42%	Stat5b/H2-T22/Nectin2/H2-K1/H2-D1/H2-Q4/H2-Q7/Gimap5/H2-Q6/H2-T23
GO:0050731	positive regulation of peptidyl-tyrosine phosphorylation	138	-0.426594	-1.57761	0.00119222	0.00119222	0.00851731	1945	tags=33%, list=14%, signal=28%	Tspan9/Fyn/Tlr4/Sema4d/Arhgef2/Il6ra/Tnf/Cd24a/Ctnnd1/Enpp2/Tgfb1/Ptprc/Plcg2/Parp9/Cd40/Fgfr3/Csf3/Gprc5b/Il15/Nrp1/Syk/Csf1r/Bmp6/Osm/Cd74/Yes1/Plpp3/Nod2/Agrn/Lyn/Kitl/Ehd4/Pecam1/Cav2/Pdgfb/Parp14/Cd36/Abi3/Vtn/Kit/Ntf3/Hcls1/Trem2/Efna1/Ighm
GO:0045765	regulation of angiogenesis	249	-0.373441	-1.47841	0.00119463	0.00119463	0.00852055	1890	tags=34%, list=14%, signal=30%	Plcg1/Tspan18/Tnf/Foxc1/Lrg1/Sp1/Wnk1/Id1/Nras/Sash1/Slc12a2/Adrb2/Rgcc/Angpt2/Ctnnb1/Il10/Ago1/Erap1/Smad1/Cd40/Ecscr/Dab2ip/Hspb1/Gata2/Jcad/Stat1/Pxn/C5ar1/Tcf4/Hoxa5/Glul/Ptprm/Eng/Nrp1/Itgb2/Ets1/Tjp1/Prkd2/Pik3cb/Epn2/Epha2/Atp2b4/Sh2b3/Vegfc/Vash1/Sp100/Ceacam1/Pparg/Il1b/Adamts9/Cd34/Cldn5/Pik3cg/Jup/Plxnd1/Col4a2/Sema6a/Flt1/Ramp2/Cxcr4/C3ar1/Stab1/Tek/Prkcb/Igf2/Cx3cr1/Rapgef3/Notch4/Tl…
GO:0050764	regulation of phagocytosis	90	-0.478486	-1.67283	0.00121832	0.00121832	0.00867531	1567	tags=34%, list=11%, signal=31%	Tgfb1/Ptprc/Plcg2/Stap1/Gata2/Tlr2/Mertk/Rapgef1/Il15/Dock2/Syk/Dysf/Abca7/Myo18a/Fcgr3/Fcer1g/Nod2/Syt7/Pparg/Cd300a/Tgm2/Fcgr2b/Itga2/Il2rg/Cd36/Fcgr1/Slc11a1/Hck/Trem2/Scarb1/Ccr7
GO:0042102	positive regulation of T cell proliferation	83	-0.492544	-1.69101	0.00122898	0.00122898	0.0087257	2233	tags=39%, list=16%, signal=32%	Stat5b/Tyk2/Jak2/Cd59a/Sash3/Nck2/Efnb1/H2-T22/Coro1a/Cd24a/Nckap1l/Nck1/Ptprc/Cd86/Jak3/H2-K1/Il15/Syk/H2-D1/Aif1/Il1b/Kitl/H2-Q4/Igf2/H2-Q7/Ccr2/Irgm1/H2-Q6/H2-T23/Icosl/Cd274/Ccr7
GO:0006487	protein N-linked glycosylation	55	0.536422	1.74349	0.0012294	0.0012294	0.0087257	3273	tags=55%, list=24%, signal=42%	Gfpt2/Mgat3/Mlec/Pmm1/Pgm3/Ostc/Ddost/Rpn1/Gfpt1/Dad1/Uggt2/Tmem258/Rpn2/Stt3a/Alg5/Alg9/Mogs/Stt3b/Ost4/B4galt7/Entpd5/Tusc3/Alg2/Gorasp1/Mgat2/B4galt1/Alg13/Slc39a8/Tmem165/Ube2j1
GO:0022898	regulation of transmembrane transporter activity	152	-0.423776	-1.59332	0.00123769	0.00123769	0.00875568	1592	tags=21%, list=12%, signal=19%	Stac/Plcg2/Adrb2/Atp1b3/Hecw2/Dmd/Cnksr3/Ikbkb/Klhl24/Ehd3/Gstm7/Dysf/Mrln/Abcb1b/Agrn/Plcb1/Mef2c/Chp2/Ctss/Kcnq1/Rasgrf2/Cav1/Shank3/Atp1b2/Hrc/Trem2/Lrrc55/Abcb1a/Tesc/Abcc9/Casq2/Kcnj8
GO:0046660	female sex differentiation	92	0.468378	1.63756	0.00123918	0.00123918	0.00875568	1367	tags=28%, list=10%, signal=26%	Rbp4/Sfrp1/Fst/Ptx3/Fgf7/Serpine1/Bmpr1b/Tnfaip6/Pla2g4a/Tyro3/Nupr1/Runx1/Wnt5a/Inhba/Zfpm2/Angpt1/Mmp2/Ptprn/Fancf/Vegfa/Pdgfra/Gas2/Fanca/Axl/Nup107/Brca2
GO:0001771	immunological synapse formation	15	-0.752886	-1.82249	0.00123965	0.00123965	0.00875568	2724	tags=73%, list=20%, signal=59%	Cd81/Nedd9/Lgals3/Dock8/Nck2/Msn/Cd2ap/Git1/Dock2/Ephb1/Ccr7
GO:0030851	granulocyte differentiation	38	-0.59012	-1.76466	0.00124937	0.00124937	0.00881008	1448	tags=39%, list=11%, signal=35%	Lbr/Csf3/Gata2/Zfpm1/Spi1/Prdm16/Ceacam1/Lyn/Inpp5d/Zbtb46/Ikzf1/C1qc/Cbfa2t3/Hcls1/Tesc
GO:0010720	positive regulation of cell development	437	-0.326516	-1.36354	0.00125706	0.00125706	0.00885	1711	tags=20%, list=12%, signal=18%	Nckap1l/Bmp2/Cd27/Enpp2/Lgals9/Klf10/Nlrp3/Ccl3/Tgfb1/Zmiz1/Ptprc/Bmp4/Ctnnb1/Il10/Cxcl12/Tnfrsf1b/Ctnnbip1/H2-DMa/Dcx/Irf1/Tlr2/Jade2/Il4i1/Sema7a/Fzd4/Gja1/Cd83/Nfkbid/Ace/H2-Aa/Il15/Nrp1/Ccl9/Syk/Csf1r/Rb1/Notch1/Atp11c/Cd74/Tnfrsf11a/Itpkb/Spi1/Il7r/L1cam/Tyrobp/Shtn1/Vegfc/Lyn/Inpp5d/Flt3l/Zbtb46/Ikzf1/Pparg/Il1b/Sox13/Afdn/Tgm2/Hlx/Cldn5/Kitl/Plxnd1/Plxna2/Flt1/Cxcr4/Vsir/Cx3cr1/Apoe/Il2rg/…
GO:0015850	organic hydroxy compound transport	187	-0.387159	-1.49324	0.00126984	0.00126984	0.0089111	1494	tags=25%, list=11%, signal=23%	Lipa/Pink1/Cxcl12/Stard4/Slc10a6/Ptch1/Abcc4/Adora2a/Relch/Gramd1b/Msr1/Acacb/Syt15/Syk/Bmp6/Abca7/Eepd1/Fcgr3/Sncg/Fcer1g/Ptgs1/Syt7/Igfbp3/Ceacam1/Pparg/Cd300a/Tgm2/Kcnb1/Aqp7/Entpd1/Prkcb/Apoe/Abcg1/Abca1/Apoc2/Abca3/Kcnq1/Cd36/Pltp/Agtr2/Cav1/Rab3b/Trem2/Scarb1/Aqp1/Slco2b1/Chga
GO:0032373	positive regulation of sterol transport	31	-0.637289	-1.82275	0.00127578	0.00127578	0.0089111	1158	tags=35%, list=8%, signal=33%	Ptch1/Abca7/Eepd1/Pparg/Apoe/Abcg1/Abca1/Abca3/Pltp/Cav1/Trem2
GO:0032376	positive regulation of cholesterol transport	31	-0.637289	-1.82275	0.00127578	0.00127578	0.0089111	1158	tags=35%, list=8%, signal=33%	Ptch1/Abca7/Eepd1/Pparg/Apoe/Abcg1/Abca1/Abca3/Pltp/Cav1/Trem2
GO:0042474	middle ear morphogenesis	23	0.688242	1.90955	0.00127597	0.00127597	0.0089111	1484	tags=43%, list=11%, signal=39%	Prrx2/Osr1/Eya4/Enpp1/Prrx1/Fgfr1/Osr2/Six2/Six1/Gas1
GO:1902749	regulation of cell cycle G2/M phase transition	108	0.447141	1.59897	0.00127597	0.00127597	0.0089111	2485	tags=34%, list=18%, signal=28%	Clspn/Brca1/Kif14/Orc1/Dtl/Ticrr/Blm/Creb3l1/Cdk1/Hacd1/Pkmyt1/Rrm1/Atad5/Cdc25c/Plk1/Donson/Cdkn2a/Atf5/Bard1/Cdk5rap3/Brsk1/Ier3/Fbxo5/Npm1/Cdc6/Lmnb1/Cdc7/Rint1/Atm/Chek1/Cdk4/Topbp1/Cenpf/Rbbp8/Cdk10/Rad50/Rnaseh2b
GO:0001558	regulation of cell growth	350	0.336975	1.38327	0.00128281	0.00128281	0.00893579	2044	tags=21%, list=15%, signal=18%	Plaat1/Slit2/Ccn5/Sfrp1/Nrg1/Sfrp2/Ccn4/Tnc/Cgref1/P3h1/Tro/Ccn3/Brca1/Sema3c/Slit3/Crabp2/Enpp1/Fn1/Wnt5a/Wnt11/Dcbld2/Avpr1a/Sphk1/Kif14/Col14a1/Inhba/Fdps/Ptprs/Sema6c/Lrp1/Dnph1/Tnfrsf12a/Egfr/Igf1/Dbn1/Arhgap32/Igfbp4/Pak1/Dact3/Cryab/Prr5/Eno1/Sema5a/Vegfa/Serpine2/Cd44/Ryk/Cdkn2a/Tgfb2/Fxn/Slc25a4/Klhl22/Tead1/Gas1/Rgs4/Derl2/Ifrd1/Npm1/Eno1b/Nubp1/Creb3/Mmp14/Sesn2/Hbegf/Rrad/Eaf2/Mfsd2a/…
GO:0030032	lamellipodium assembly	64	-0.513885	-1.70305	0.00128498	0.00128498	0.00893579	2682	tags=44%, list=19%, signal=35%	Twf2/Actr2/Nckap1/Fscn1/Fgd4/Cyfip1/Whamm/Nck2/Spef1/Akirin1/Ptpro/Wasf2/Nck1/P2ry12/Pxn/Spata13/Arhgef7/Rac2/Epha2/S1pr1/Parvb/Ablim1/Abi3/Kit/Cdh13/Ablim3/Aqp1/Was
GO:0032481	positive regulation of type I interferon production	70	-0.508808	-1.7128	0.00128565	0.00128565	0.00893579	3865	tags=56%, list=28%, signal=40%	Polr3a/Tlr8/Irf3/Ticam2/Rab2b/Polr3f/Oas1c/Rnf135/Ifnar1/Traf6/Ptpn22/Zc3hav1/Mavs/Traf3ip3/Zbtb20/Polr3c/Nmb/Mmp12/Ddx3x/Tbk1/Dhx58/Tlr7/Tlr4/Tank/Arrdc4/Irf5/Plcg2/Irf1/Ifih1/Tlr2/Stat1/Trim56/Oas2/Cd14/Syk/Oas1a/Isg15/Irf7/Tlr3
GO:0035306	positive regulation of dephosphorylation	50	-0.55072	-1.75247	0.00129623	0.00129623	0.00899495	2028	tags=36%, list=15%, signal=31%	Nck2/Gna12/Bmp2/Slc39a10/Nck1/Tgfb1/Ptprc/Pink1/Plek/Ppp2r5a/Itga1/Pirb/Cd300a/Mef2c/Chp2/Ppp1r16b/Agtr2/Cdh5
GO:0090266	regulation of mitotic cell cycle spindle assembly checkpoint	18	0.724551	1.86486	0.00130834	0.00130834	0.00905015	1612	tags=50%, list=12%, signal=44%	Knl1/Birc5/Incenp/Cdca8/Aurkb/Ndc80/Gen1/Anapc15/Cdk5rap2
GO:1903504	regulation of mitotic spindle checkpoint	18	0.724551	1.86486	0.00130834	0.00130834	0.00905015	1612	tags=50%, list=12%, signal=44%	Knl1/Birc5/Incenp/Cdca8/Aurkb/Ndc80/Gen1/Anapc15/Cdk5rap2
GO:0009066	aspartate family amino acid metabolic process	25	0.672874	1.89512	0.00134376	0.00134376	0.00926319	3511	tags=60%, list=26%, signal=45%	Phgdh/Plod2/Ass1/Gcat/Sdsl/Plod3/Mri1/Mthfd1/Mtap/Nit2/Asrgl1/Got1/Mtr/Aasdhppt/Apip
GO:0090231	regulation of spindle checkpoint	21	0.706659	1.89796	0.00134426	0.00134426	0.00926319	1612	tags=48%, list=12%, signal=42%	Knl1/Birc5/Incenp/Cdca8/Aurkb/Ndc80/Gen1/Anapc15/Zwint/Cdk5rap2
GO:0031401	positive regulation of protein modification process	684	-0.296212	-1.28394	0.00134551	0.00134551	0.00926319	1945	tags=20%, list=14%, signal=18%	Tspan9/Dipk2a/Fyn/Ralb/Gna12/Tlr4/Sema4d/Arhgef2/Tank/Rapgef2/Il6ra/Tnf/Tlr1/Cd24a/Insr/Bmp2/Slc39a10/Ctnnd1/Enpp2/Sash1/Nck1/Arrdc4/Tgfb1/Ptprc/Slco3a1/Plcg2/Cd86/Adrb2/Bmp4/Rgcc/Pink1/Parp9/Fnip2/Cd40/Fgfr3/Dab2ip/Map2k6/Csf3/Cln3/Gprc5b/Pxn/Nmi/Grk3/Dip2b/Rassf2/Nop53/Flt4/Sema7a/Fgd2/Fzd4/P2rx7/Ace/Xiap/Ppp2r5a/Il15/Irgm2/Eng/Tcim/Nrp1/Syk/Pdgfd/Csf1r/Bmp6/Osm/Itga1/Cd74/Tnfrsf11a/Prr5l/Yes1/…
GO:0030522	intracellular receptor signaling pathway	291	-0.357492	-1.43721	0.0013504	0.0013504	0.00927564	2291	tags=28%, list=17%, signal=24%	Ddx3x/Calcoco1/Rftn1/Dab2/Nr1h2/Casp4/Becn1/Jak2/Ep300/Mark4/Eif2ak2/Ncoa2/Kdm4c/Trim11/Nr3c1/Trim24/Tbk1/Rxra/Dhx58/Epg5/Sec14l1/Tlr7/Tlr4/Atat1/Tnf/Wbp2/Bmp2/Srarp/Zdhhc18/Nlrp3/Zmiz1/Ifi206/Plcg2/Cd86/Nod1/Dhrs3/Unc93b1/Oasl1/Actn4/Irf2/Ifi207/Irf1/Ifih1/Mndal/Kmt2d/Tifa/Slc15a3/Nop53/Hmga1/Trim25/Rarb/Peg13/Rnf125/Irgm2/Ncoa3/Ifi209/Rarg/Nod2/Oas1a/Pik3ap1/Igtp/Ifi203/Pparg/Prcp/Flt1/Irf7/Tri…
GO:0090232	positive regulation of spindle checkpoint	13	0.773913	1.84229	0.00135158	0.00135158	0.00927564	1104	tags=54%, list=8%, signal=50%	Knl1/Birc5/Incenp/Cdca8/Aurkb/Ndc80/Gen1
GO:0010954	positive regulation of protein processing	19	0.716657	1.86792	0.00136648	0.00136648	0.00935654	1744	tags=53%, list=13%, signal=46%	Nkd2/Spon1/Ccbe1/Bag2/Eno1/Gsn/Timm23/Src/Eno1b/Mmp14
GO:0007080	mitotic metaphase chromosome alignment	56	0.544117	1.76887	0.00136766	0.00136766	0.00935654	3843	tags=55%, list=28%, signal=40%	Cdca5/Kif14/Spdl1/Birc5/Ska1/Ska3/Incenp/Cdca8/Aurkb/Kifc1/Ndc80/Nuf2/Cenpe/Kif22/Cdt1/Mis12/Kifc5b/Kpnb1/Eml4/Ccnb1/Nup62/Nudc/Kif2c/Mad1l1/Kif18a/Cenpc1/Hnrnpu/Rrs1/Cdc23/Pinx1/Ska2
GO:0042311	vasodilation	48	-0.56624	-1.78003	0.00139095	0.00139095	0.00950097	1476	tags=35%, list=11%, signal=32%	Grk2/Tnf/Adrb2/Rgs2/Bloc1s6/Adora2a/Gja1/Ptprm/Itga1/Gch1/Apoe/Agtr2/Kdr/Ednrb/Gja5/Gucy1a1/Kcnj8
GO:0033344	cholesterol efflux	40	-0.596384	-1.79388	0.00139867	0.00139867	0.00953872	1158	tags=35%, list=8%, signal=32%	Lipa/Ptch1/Abca7/Eepd1/Pparg/Apoe/Abcg1/Abca1/Apoc2/Abca3/Pltp/Cav1/Trem2/Scarb1
GO:0002752	cell surface pattern recognition receptor signaling pathway	65	-0.511173	-1.69998	0.00141116	0.00141116	0.00959388	3911	tags=51%, list=28%, signal=37%	Ripk2/Scimp/Irf3/Ticam2/Oas1c/Pik3r1/Peli1/Rela/Nr1h3/Appl2/Traf6/Ptpn22/Tirap/Tnip2/Nr1d1/Irak2/Znrf1/Tbk1/Tlr4/Tlr1/Ly96/Tnip3/Dab2ip/Tlr2/Nmi/Cd14/Ifi35/Nod2/Oas1a/Pik3ap1/Lyn/Nepn/Trem2
GO:0140895	cell surface toll-like receptor signaling pathway	65	-0.511173	-1.69998	0.00141116	0.00141116	0.00959388	3911	tags=51%, list=28%, signal=37%	Ripk2/Scimp/Irf3/Ticam2/Oas1c/Pik3r1/Peli1/Rela/Nr1h3/Appl2/Traf6/Ptpn22/Tirap/Tnip2/Nr1d1/Irak2/Znrf1/Tbk1/Tlr4/Tlr1/Ly96/Tnip3/Dab2ip/Tlr2/Nmi/Cd14/Ifi35/Nod2/Oas1a/Pik3ap1/Lyn/Nepn/Trem2
GO:0032606	type I interferon production	116	-0.444277	-1.59411	0.00141671	0.00141671	0.00961665	3237	tags=40%, list=24%, signal=31%	Rnf135/Atg12/Ifnar1/Crebbp/Traf6/Ptpn22/Tirap/Morc3/Zc3hav1/Mavs/Traf3ip3/Zbtb20/Polr3c/Nmb/Mmp12/Ddx3x/Tbk1/Dhx58/Tlr7/Tlr4/Tank/Arrdc4/Irf5/Plcg2/Irf1/Ifih1/Tlr2/Stat1/Nmi/Trim56/Oas2/Cd14/Rnf125/Irgm2/Syk/Irf9/Oas1a/Irf8/Tyrobp/Igtp/Isg15/Xaf1/Irf7/Tlr3/Irgm1/Gbp4
GO:0043009	chordate embryonic development	675	0.305541	1.31739	0.00146357	0.00146357	0.00991926	1874	tags=20%, list=14%, signal=18%	Arhgdig/Slit2/Rbp4/Twist2/Gjb5/Sfrp1/Rbm46/Sfrp2/Cthrc1/Prrx2/Aldh1a2/Lif/Col11a1/Twist1/Osr1/Phgdh/Scx/Rspo3/Fzd2/Shox2/Brca1/Sema3c/Rrm2/Pth1r/Stil/Asf1b/En1/Dzip1l/Col1a1/Runx1/Wnt5a/Tbx15/Tgfb3/Pcsk5/Plk4/Ror2/Zfpm2/Alx4/Col3a1/Nek2/E2f8/Bmpr1a/Slc8a1/Prrx1/Fkbp10/Wnt9a/Angpt1/Rcn1/Dact1/Cenpu/Ncapg2/Fzd1/Fgfr1/Egfr/Igf1/Ssr2/Dbn1/Sulf2/Meg3/Sulf1/Tbx18/Fzd5/Osr2/Dnaaf2/Vash2/Hoxc6/Tpm1/Ptk7/…
GO:0002577	regulation of antigen processing and presentation	20	-0.707299	-1.84293	0.00147001	0.00147001	0.00994747	2182	tags=65%, list=16%, signal=55%	H2-Ob/Tapbpl/Tap2/Nod1/Hfe/Cd74/H2-Ab1/Cd68/Nod2/Slc11a1/Trem2/Was/Ccr7
GO:0090090	negative regulation of canonical Wnt signaling pathway	109	0.435553	1.56227	0.00150618	0.00150618	0.0101764	984	tags=20%, list=7%, signal=19%	Sfrp1/Sfrp2/Cthrc1/Nkd2/Wnt5b/Tnn/Mdk/Wnt5a/Wnt11/Tpbg/Ror2/Rbms3/Dact1/Bicc1/Fzd1/Nphp4/Tbx18/Dact3/Gli3/Nkd1/Dkk3/Sox9
GO:0008585	female gonad development	82	0.47263	1.6306	0.00151869	0.00151869	0.0102334	1367	tags=27%, list=10%, signal=24%	Sfrp1/Fst/Ptx3/Fgf7/Serpine1/Bmpr1b/Tnfaip6/Pla2g4a/Nupr1/Runx1/Inhba/Zfpm2/Angpt1/Mmp2/Ptprn/Fancf/Vegfa/Pdgfra/Gas2/Fanca/Nup107/Brca2
GO:0055075	potassium ion homeostasis	21	-0.690789	-1.82741	0.00151932	0.00151932	0.0102334	1735	tags=57%, list=13%, signal=50%	Wnk1/Slc12a2/Atp1b3/Klhl3/Slc12a6/Slc12a9/Slc12a7/Kcnq1/Slc12a5/Atp1b2/Kcna5/Atp1a2
GO:0006465	signal peptide processing	15	0.739318	1.81055	0.00154992	0.00154992	0.0104235	1702	tags=47%, list=12%, signal=41%	Pcsk5/Arxes1/Arxes2/Sec11a/H13/Spcs1/Spcs2
GO:0010594	regulation of endothelial cell migration	152	-0.419942	-1.5789	0.00158607	0.00158607	0.0106501	2417	tags=43%, list=18%, signal=36%	Nus1/Gadd45a/Gata3/Rras/Krit1/Zc3h12a/Tgfbr3/Hdac7/Akt3/Adam17/Plcg1/Patz1/Tnf/Pik3c2a/Sp1/Meox2/Sash1/Tgfb1/Nr2f2/Hdac5/Bmp4/Rgcc/Angpt2/Cd40/Atoh8/Dab2ip/Hspb1/Gata2/Jcad/Flt4/Col18a1/Glul/Stc1/Ptprm/Nrp1/Notch1/Ets1/Prkd2/Pik3cb/Alox12/Plpp3/Epha2/Atp2b4/Vegfc/Vash1/Sp100/Ceacam1/Pparg/Adamts9/Prcp/Pik3cg/Mef2c/Jup/Robo4/Tek/Igf2/Apoe/Pdgfb/Hdac9/Card10/Nos3/Mmrn2/Kdr/Efna1/Dll4
GO:0043123	positive regulation of canonical NF-kappaB signal transduction	130	-0.424782	-1.5486	0.00162507	0.00162507	0.0108952	3204	tags=42%, list=23%, signal=32%	Peli1/Rela/Fbxw11/Lamtor5/Traf3ip2/Alpk1/Traf6/Il1a/Eda2r/Trim8/Card11/Nfat5/Tirap/Tnip2/Edn1/Zc3hav1/Terf2ip/Clec4n/Rbck1/Casp1/Rnf31/Irak4/Tmem106a/Casp8/Tlr4/Tnf/Mid2/Tgfb1/Nod1/Pink1/Trim12a/Dab2ip/Trim5/Gprc5b/Tifa/Ikbkb/Trim12c/Trim25/Trim30d/Cd74/Trim21/Nod2/Trim34a/Il1b/Tgm2/Trim6/Trim30a/Prkcb/Cx3cr1/Tlr3/Tnfsf10/Cd36/Cav1/Ednrb
GO:0009792	embryo development ending in birth or egg hatching	688	0.304109	1.3151	0.00165633	0.00165633	0.0110858	1874	tags=19%, list=14%, signal=18%	Arhgdig/Slit2/Rbp4/Twist2/Gjb5/Sfrp1/Rbm46/Sfrp2/Cthrc1/Prrx2/Aldh1a2/Lif/Col11a1/Twist1/Osr1/Phgdh/Scx/Rspo3/Fzd2/Shox2/Brca1/Sema3c/Rrm2/Pth1r/Stil/Asf1b/En1/Dzip1l/Col1a1/Runx1/Wnt5a/Tbx15/Tgfb3/Pcsk5/Plk4/Ror2/Zfpm2/Alx4/Col3a1/Nek2/E2f8/Bmpr1a/Slc8a1/Prrx1/Fkbp10/Wnt9a/Angpt1/Rcn1/Dact1/Cenpu/Ncapg2/Fzd1/Fgfr1/Egfr/Igf1/Fgf2/Ssr2/Dbn1/Sulf2/Meg3/Sulf1/Tbx18/Fzd5/Osr2/Dnaaf2/Vash2/Hoxc6/Tpm1/…
GO:0008285	negative regulation of cell population proliferation	574	-0.309039	-1.31912	0.00166101	0.00166101	0.0110858	2189	tags=28%, list=16%, signal=25%	Rc3h1/Ptpn14/Lilrb4a/Ift172/Jak2/Runx3/Tgfbr3/Lgals3/Apc/Wdr13/Dusp1/Eif2ak2/H2-T22/Trim24/Rxra/Pde9a/Cdkn1c/Lst1/Pdcd4/Gna12/Pawr/Skap2/Sh3bp4/Akirin1/Rapgef2/Tnf/Sfn/Hspg2/Cd24a/Bmp2/Cd109/Cdk6/Igfbp5/Lgals9/Ccl12/Rps6ka2/Klf13/Ctnna1/Tgfb1/Cd86/Nr2f2/Hpgds/Ifitm1/Bmp4/Dis3l2/Rgcc/Cd37/Fnip2/Ctnnb1/Nfib/Il10/Tnfrsf13b/Cxcl12/Cd9/Ackr3/Apln/Smad1/Ifitm3/Fgfr3/Ctnnbip1/Tes/Atoh8/Dab2ip/Adarb1/Ptt…
GO:0060322	head development	542	0.31374	1.34004	0.00166113	0.00166113	0.0110858	1626	tags=19%, list=12%, signal=18%	Mgarp/Slit2/Ptger3/Twist2/Sfrp1/Nrg1/Sfrp2/Aldh1a3/Aldh1a2/Lmx1b/Scx/Ephb2/Emx2/Ephb3/Dclk1/Meis3/Tyro3/Stil/En1/Pitx1/Col1a1/Mdk/Wnt5a/Mdga1/Tgfb3/Meis2/Cacna1a/Slc1a2/Il11ra1/B4galt2/Sphk1/Kif14/Inhba/Col3a1/Tubb2b/Aspm/Ccdc134/Bmpr1a/Ptprs/Nr2f1/Dock7/Ncam1/Numbl/Fgfr1/Egfr/Igf1/Smarca1/Fgf2/Mmp2/Robo1/Pak1/Pcdh18/Tsku/Osr2/Tacc3/Diaph3/Gli3/Rac3/Fzd3/Hspa5/Nfix/Ezh2/Ugp2/Sema5a/Myh10/Gbx2/Sox…
GO:0032673	regulation of interleukin-4 production	30	-0.626196	-1.78215	0.001719	0.001719	0.011437	2545	tags=57%, list=18%, signal=46%	Rara/Gata3/Sash3/H2-T22/Nlrp3/Il20rb/Zfpm1/Cd83/H2-K1/Syk/H2-D1/Fcer1g/H2-Q4/H2-Q7/H2-Q6/H2-T23/Icosl
GO:0045747	positive regulation of Notch signaling pathway	34	-0.598769	-1.7399	0.001719	0.001719	0.011437	1089	tags=38%, list=8%, signal=35%	Zmiz1/Eya1/Tspan14/Notch1/Epn2/Nod2/Jag2/Lfng/Mfng/Dll1/Kit/Robo2/Dll4
GO:0060350	endochondral bone morphogenesis	55	0.529402	1.72067	0.00172496	0.00172496	0.0114542	1744	tags=38%, list=13%, signal=33%	Comp/Scx/Thbs1/Tmem119/Scube2/Shox2/Col27a1/Enpp1/Col1a1/Col3a1/Thbs3/Csgalnact1/Nfix/Sox9/Serpinh1/Runx2/Mmp16/Ext1/Carm1/Fgf18/Mmp14
GO:1903555	regulation of tumor necrosis factor superfamily cytokine production	163	-0.404634	-1.53443	0.00172691	0.00172691	0.0114542	2219	tags=44%, list=16%, signal=37%	Cd47/Akap8/Ptpn22/Arid5a/Lrrk2/Arrb2/Cyp2j6/Tirap/Bcl3/Zfp36/Nfkbil1/Gpnmb/Mavs/Rara/Zbtb20/Zc3h12a/Tmem106a/Lilrb4a/Jak2/Sash3/Adam8/H2-T22/Tlr4/Arhgef2/Tlr1/Cd24a/Ly96/Lgals9/Ccl3/Tgfb1/Ptprc/Plcg2/Nod1/Il10/Ifngr1/Hspb1/Lpl/Ifih1/Tlr2/Ccr5/Oas2/H2-K1/Cd14/Il27ra/Clu/Syk/Csf1r/H2-D1/Ptafr/Fcgr3/Fcer1g/Nod2/Ptpn6/Oas1a/Tyrobp/Fcgr2b/Cd84/Trim30a/Vsir/H2-Q4/Cx3cr1/Tlr3/H2-Q7/Ccr2/Cd36/H2-Q6/Cybb/…
GO:0034330	cell junction organization	600	-0.309522	-1.32638	0.00173275	0.00173275	0.0114542	2026	tags=24%, list=15%, signal=21%	Stk38l/Efnb1/Plec/Cabp1/Ophn1/Trpv4/Rab8b/Fyn/Mark2/Sema4d/Srgap2/Rapgef2/Ptpro/Tnf/Kifc3/Chrnb1/Ston1/Nbea/Wasf2/Insr/Dlgap3/Chchd10/Enpp2/Chmp2b/Myo6/Ctnna1/Hipk1/Tgfb1/Iqsec3/Sdcbp/Tanc1/Lzts1/Cldn34c1/Pcdhb16/Adgre5/Micall2/Heg1/Ctnnb1/Cd2ap/Il10/Cd9/Actn4/Dgkz/Dab2ip/Ppfia4/Amigo2/Sorbs1/Cln3/Itgb4/Tlr2/Pxn/C5ar1/Ikbkb/Rapgef1/Dnm3/Taok2/Adam10/Gja1/Dusp22/Hmcn2/Efnb2/Cldn15/Cttnbp2/Ace/Thsd…
GO:0043304	regulation of mast cell degranulation	26	-0.651769	-1.81443	0.00173425	0.00173425	0.0114542	2633	tags=42%, list=19%, signal=34%	Stxbp1/Fes/Stxbp2/Pld2/Gata2/Syk/Rac2/Fcer1g/Lyn/Cd300a/Cd84
GO:0032411	positive regulation of transporter activity	65	-0.505358	-1.68064	0.00173473	0.00173473	0.0114542	1592	tags=29%, list=12%, signal=26%	Stac/Plcg2/Adrb2/Atp1b3/Dmd/Cnksr3/Ikbkb/Ehd3/Gstm7/Abcb1b/Plcb1/Chp2/Ctss/Shank3/Atp1b2/Trem2/Lrrc55/Abcb1a/Tesc
GO:0002424	T cell mediated immune response to tumor cell	13	-0.767826	-1.80861	0.00174671	0.00174671	0.0115032	1743	tags=62%, list=13%, signal=54%	Cd24a/Il4i1/H2-K1/H2-D1/Ahr/H2-Q4/H2-Q7/H2-Q6
GO:0007268	chemical synaptic transmission	476	-0.32014	-1.34857	0.00175191	0.00175191	0.0115032	2611	tags=29%, list=19%, signal=24%	Creb1/Atp1a3/Rap1a/Mtmr2/Celf4/Met/Rara/Fbxl20/Napb/Hap1/Rhot1/Synj1/Ptk2/Npff/Lin7c/Rab11a/Pvalb/Stxbp2/Abr/Iqsec1/Zzef1/Hrh1/Cyfip1/Rin1/Jak2/Bcr/Lnpep/Npy1r/Pnkd/Slc4a8/Nr3c1/Ophn1/Pde9a/Vps54/Npr2/Fyn/Syn3/Grk2/Syn2/Plcg1/Stxbp5/Rapgef2/Tnf/Htr7/Cd24a/Chrnb1/Wnk1/Dlgap3/Gnai2/Chmp2b/Cplx2/Myo6/Slc12a2/Lzts1/Lin7a/Aph1c/Adrb2/Pcdhb16/Pink1/Nrgn/Mink1/Eif4ebp2/Ctnnb1/Cd2ap/P2ry2/Dgkz/Adarb1/Git…
GO:0098916	anterograde trans-synaptic signaling	476	-0.32014	-1.34857	0.00175191	0.00175191	0.0115032	2611	tags=29%, list=19%, signal=24%	Creb1/Atp1a3/Rap1a/Mtmr2/Celf4/Met/Rara/Fbxl20/Napb/Hap1/Rhot1/Synj1/Ptk2/Npff/Lin7c/Rab11a/Pvalb/Stxbp2/Abr/Iqsec1/Zzef1/Hrh1/Cyfip1/Rin1/Jak2/Bcr/Lnpep/Npy1r/Pnkd/Slc4a8/Nr3c1/Ophn1/Pde9a/Vps54/Npr2/Fyn/Syn3/Grk2/Syn2/Plcg1/Stxbp5/Rapgef2/Tnf/Htr7/Cd24a/Chrnb1/Wnk1/Dlgap3/Gnai2/Chmp2b/Cplx2/Myo6/Slc12a2/Lzts1/Lin7a/Aph1c/Adrb2/Pcdhb16/Pink1/Nrgn/Mink1/Eif4ebp2/Ctnnb1/Cd2ap/P2ry2/Dgkz/Adarb1/Git…
GO:0043331	response to dsRNA	38	-0.578941	-1.73123	0.00175271	0.00175271	0.0115032	1226	tags=32%, list=9%, signal=29%	Zc3hav1/Mavs/Rftn1/Ralb/Ifih1/Stat1/Mapk3/P2rx7/Nod2/Tlr3/Cav1/Kcnj8
GO:0016055	Wnt signaling pathway	352	0.338984	1.39367	0.00176377	0.00176377	0.0115584	1625	tags=19%, list=12%, signal=17%	Sfrp1/Sfrp2/Cthrc1/Cdh3/Ccn4/Nkd2/Cmah/Rspo3/Wnt5b/Fzd2/Tnn/Enpp1/Col1a1/Mdk/Wnt5a/Col6a1/Wnt11/Tpbg/Ror2/Ccne1/Aspm/Rbms3/Tiam1/Wnt9a/Lrp1/Dact1/Bicc1/Fzd1/Egfr/Nphp4/Fgf2/Sulf2/Sulf1/Tbx18/Fzd5/Dact3/Tsku/Ptk7/Gli3/Rac3/Fzd3/Siah1b/Nkd1/Nfatc4/Ift20/Sema5a/Cdk14/Dkk3/Sox9/Vax2/Cd44/Sdc1/Ryk/Pygo1/Wls/Dkk2/Mdfi/Cdh2/Ext1/Cpz/Tmem9/Tert/Src/Apcdd1/Ppp2r3a/Snai1
GO:0035239	tube morphogenesis	770	-0.296783	-1.29272	0.00176812	0.00176812	0.0115695	1496	tags=22%, list=11%, signal=21%	Nr2f2/Hdac5/Adrb2/Bmp4/Rgcc/Pnpla6/Heg1/Angpt2/Ctnnb1/Nfib/Il10/Cxcl12/Ago1/Ackr3/Erap1/Apln/Mylk/Smad1/Celsr1/Cd40/Fgfr3/Kctd10/Ctnnbip1/Atoh8/Ecscr/Dab2ip/Hspb1/Sema4c/Hey1/Gata2/Jcad/Ift122/Lrp5/Stat1/Klhl3/Pxn/C5ar1/Tcf4/Ptch1/Prkx/Fat4/Elk3/Eya1/Thsd7a/Flt4/Fzd4/Gja1/Hoxa5/Efnb2/Col18a1/Glul/Ace/Adam15/Ptprm/Eng/Nrp1/Nrp2/Itgb2/Syk/Notch1/Ets1/Apold1/Dysf/Tjp1/Ncoa3/Ahr/Prkd2/Rarg/Pik3cb/Cec…
GO:1901607	alpha-amino acid biosynthetic process	44	0.567771	1.77233	0.00180495	0.00180495	0.0117928	2043	tags=36%, list=15%, signal=31%	Bcat1/Phgdh/Plod2/Ass1/Pycr1/Sdsl/Aldh18a1/Dhfr/Gls2/Cad/Plod3/Psat1/Mri1/Mthfd1/Shmt2/Mtap
GO:0015844	monoamine transport	59	-0.524502	-1.7248	0.00181449	0.00181449	0.011802	1893	tags=36%, list=14%, signal=31%	Grk2/Htr7/P2ry12/Pink1/Cxcl12/Adora2a/Syt15/Syk/Fcgr3/Sncg/Fcer1g/Ptgs1/Syt7/Cd300a/Tgm2/Kcnb1/Entpd1/Prkcb/Agtr2/Rab3b/Chga
GO:0098659	inorganic cation import across plasma membrane	59	-0.524272	-1.72404	0.00181449	0.00181449	0.011802	1963	tags=34%, list=14%, signal=29%	Trpv4/Fyn/Pawr/Wnk1/Slc39a10/Slc12a2/Adrb2/Atp1b3/Slc12a6/Kcnj2/Slc12a7/Slc30a1/Kcnq1/Slc12a5/Cav1/Atp1b2/Atp1a2/Akap5/Abcc9/Kcnj8
GO:0099587	inorganic ion import across plasma membrane	59	-0.524272	-1.72404	0.00181449	0.00181449	0.011802	1963	tags=34%, list=14%, signal=29%	Trpv4/Fyn/Pawr/Wnk1/Slc39a10/Slc12a2/Adrb2/Atp1b3/Slc12a6/Kcnj2/Slc12a7/Slc30a1/Kcnq1/Slc12a5/Cav1/Atp1b2/Atp1a2/Akap5/Abcc9/Kcnj8
GO:0071396	cellular response to lipid	406	-0.335241	-1.39498	0.00184646	0.00184646	0.0119751	2369	tags=28%, list=17%, signal=24%	Casp1/Cd180/Kdm6a/Nfe2l1/Irak2/Calcoco1/Dab2/Fes/Zc3h12a/Irak4/Lancl2/Lilrb4a/Jak2/Bcr/Akr1c19/Ep300/Ncoa2/Kdm4c/Ret/Msn/Nr3c1/Id3/Trim24/Rxra/Vps54/Pdcd4/Cxcl10/Casp9/Tlr4/Fam210b/Tnf/Casp7/Wbp2/Ly96/Sbno2/Srarp/Sash1/Nlrp3/Tgfb1/Zmiz1/Slc12a2/Pde4b/Plcg2/Cd86/Pid1/Tnip3/Bmp4/Stap1/Il10/Plscr4/Trim12a/Tnfrsf1b/P2ry6/Dab2ip/Git1/Lpl/Trim5/Crebrf/Kmt2d/Stat1/Ptch1/Trim12c/Pf4/Inhbb/Gramd1b/Mapk3/P…
GO:0051783	regulation of nuclear division	121	0.441543	1.60958	0.00184659	0.00184659	0.0119751	2079	tags=35%, list=15%, signal=30%	Lif/Obsl1/Knl1/Ube2c/Wnt5a/Sphk1/Ttk/Pdxp/Spdl1/Spc25/Spc24/Birc5/Trip13/Igf1/Bub1/Ccdc8/Rcc1/Incenp/Cdca8/Aurkb/Plk1/Ndc80/Gen1/Cdca2/Zwilch/Nuf2/Klhl22/Cenpe/Mki67/Cdc16/Calr/Anapc15/Fbxo5/Rad51ap1/Zwint/Cdk5rap2/Tubg1/Cul7/Pebp1/Atm/Ooep/Chek1
GO:0007143	female meiotic nuclear division	31	0.629412	1.84623	0.00185838	0.00185838	0.0120336	2244	tags=45%, list=16%, signal=38%	Rbm46/Ttk/Top2a/Trip13/Plk1/Mastl/Ndc80/Spire1/Cenpe/Fbxo5/Ncaph/Atm/Sgo2a/Ddb1
GO:0030889	negative regulation of B cell proliferation	18	-0.703718	-1.79066	0.00186357	0.00186357	0.0120368	2189	tags=67%, list=16%, signal=56%	Rc3h1/Pawr/Cd24a/Il10/Tnfrsf13b/Pkn1/Tyrobp/Lyn/Inpp5d/Cd300a/Fcgr2b/Tnfrsf21
GO:0016045	detection of bacterium	16	-0.73795	-1.81283	0.0018644	0.0018644	0.0120368	1786	tags=69%, list=13%, signal=60%	Tlr1/Nod1/Tlr2/H2-K1/H2-D1/Nod2/Naip2/Pglyrp1/H2-Q4/H2-Q7/H2-Q6
GO:0046683	response to organophosphorus	68	-0.501012	-1.68487	0.00186758	0.00186758	0.0120395	1923	tags=34%, list=14%, signal=29%	Tlr7/Npr2/Rapgef2/Igfbp5/P2ry12/Plcg2/Inpp5k/P2ry6/Rapgef1/Hmga1/Crem/P2rx7/Ahr/Itpr3/Il1b/Pik3cg/Rapgef3/Pde2a/Kcnq1/Aqp1/Trpc3/Abcc9/Kcnj8
GO:0001502	cartilage condensation	14	0.755856	1.83237	0.00187234	0.00187234	0.0120524	1179	tags=57%, list=9%, signal=52%	Col11a1/Bmpr1b/Barx2/Ror2/Ccn2/Acan/Sox9/Tgfb2
GO:0002698	negative regulation of immune effector process	105	-0.445958	-1.59027	0.00187777	0.00187777	0.0120526	2252	tags=47%, list=16%, signal=39%	Abr/Zc3h12a/Rc3h1/Lilrb4a/Bcr/Lgals3/Cd59a/H2-T22/Masp1/Tnf/Nckap1l/Tap2/Lgals9/Tgfb1/Tap1/Ptprc/Cr1l/Il10/Il20rb/Irf1/Bst2/Il4i1/Jak3/Enpp3/Pf4/Dusp22/H2-K1/Hfe/H2-D1/Ahr/Spi1/Il7r/Nod2/Ptpn6/Clec2d/Pglyrp1/Ceacam1/Cd300a/Hlx/Fcgr2b/Cd84/Vsir/H2-Q4/Igf2/Cx3cr1/H2-Q7/Ccr2/H2-Q6/H2-T23
GO:0022605	mammalian oogenesis stage	10	0.81386	1.79388	0.0018779	0.0018779	0.0120526	244	tags=30%, list=2%, signal=29%	Ptx3/Bmpr1b/Tnfaip6
GO:0032640	tumor necrosis factor production	167	-0.40031	-1.51745	0.0018904	0.0018904	0.0121149	2954	tags=43%, list=21%, signal=34%	Cd47/Akap8/Ptpn22/Arid5a/Lrrk2/Arrb2/Cyp2j6/Tirap/Bcl3/Zfp36/Nfkbil1/Gpnmb/Mavs/Rara/Zbtb20/Frmd8/Zc3h12a/Tmem106a/Lilrb4a/Jak2/Sash3/H2-T22/Tlr4/Arhgef2/Tlr1/Cd24a/Ly96/Lgals9/Ccl3/Tgfb1/Ptprc/Plcg2/Nod1/Il10/Ifngr1/Hspb1/Lpl/Ifih1/Tlr2/Ccr5/Oas2/H2-K1/Cd14/Il27ra/Clu/Syk/Csf1r/H2-D1/Ptafr/Fcgr3/Fcer1g/Nod2/Ptpn6/Oas1a/Tyrobp/Fcgr2b/Cd84/Trim30a/Vsir/H2-Q4/Cx3cr1/Tlr3/H2-Q7/Ccr2/Cd36/H2-Q6/Cybb/…
GO:0141091	transforming growth factor beta receptor superfamily signaling pathway	263	0.361973	1.44408	0.00190434	0.00190434	0.012169	921	tags=16%, list=7%, signal=15%	Grem2/Sfrp1/Fst/Lox/Sfrp2/Comp/Ccl2/Cdh3/Cilp/Fbn2/Scx/Bmpr1b/Thbs1/Cdkn2b/Bmper/Fbn1/Tnfaip6/Vasn/Adamtsl2/Wnt5a/Tgfb3/Col1a2/Ror2/Inhba/Aspn/Col3a1/Emilin1/Fstl1/Ltbp3/Bmpr1a/Neo1/Lrp1/Fzd1/Lefty1/Pmepa1/Itgb5/Sulf1/Magi2/Hpgd/Hspa5/Tmem53
GO:0030855	epithelial cell differentiation	440	-0.322199	-1.34489	0.00190442	0.00190442	0.012169	2311	tags=29%, list=17%, signal=25%	Nfe2l1/Flnb/Tjp2/Dab2/Lamb2/Stat5b/Wwtr1/Cflar/Commd5/Rilpl1/Bcr/Clic4/Fosl2/Apc/Foxj2/Numb/Plec/Msn/Id3/Ophn1/Rxra/Tigar/Cdkn1c/Npr2/Rapgef2/Ptpro/Tnf/Sfn/Foxc1/Cd24a/Spred2/Bmp2/Cd109/Psap/Id1/Cdk6/Ctnnd1/Myo6/Tgfb1/Triobp/Nr2f2/Lipa/Tmod1/Bmp4/Heg1/Klf7/Ctnnb1/Cd2ap/Nfib/Tprn/Fgfr3/Hoxa7/Atoh8/Tdrd7/Hey1/Dmd/Gata2/Ptch1/Sipa1/Ikbkb/Rapgef1/Fat4/Eya1/Fzd4/Gja1/Rarb/Hoxa5/Col18a1/Stc1/Cdh23/Csf1…
GO:0001776	leukocyte homeostasis	114	-0.434893	-1.56082	0.00191053	0.00191053	0.0121901	2236	tags=39%, list=16%, signal=33%	Wdr37/Stat5b/Sos1/Rc3h1/Lilrb4a/Gpr183/Sash3/Adam17/Tcirg1/Tspan9/Coro1a/Cd24a/Nckap1l/Sos2/Tgfb1/Pde4b/Lipa/Tnfrsf13b/Il20rb/Mertk/Jak3/Ikbkb/Pkn1/P2rx7/Tsc22d3/Csf1r/Cd74/Ahr/Pik3cb/Itpkb/Fcer1g/Il7r/Lmo1/Pirb/Sh2b3/Lyn/Spns2/Fcgr2b/Mef2c/Kitl/Mecom/Ccr2/Aim2/Gimap5
GO:0044818	mitotic G2/M transition checkpoint	52	0.546691	1.7684	0.00194676	0.00194676	0.0124032	2392	tags=40%, list=17%, signal=33%	Clspn/Brca1/Orc1/Dtl/Ticrr/Blm/Creb3l1/Cdk1/Plk1/Donson/Bard1/Cdk5rap3/Brsk1/Ier3/Cdc6/Rint1/Atm/Chek1/Topbp1/Rbbp8/Rad50
GO:0071404	cellular response to low-density lipoprotein particle stimulus	25	-0.662303	-1.82667	0.00196292	0.00196292	0.0124879	1887	tags=52%, list=14%, signal=45%	Tlr4/Tgfb1/Cd9/Lpl/Mylip/Itgb2/Syk/Cd68/Fcer1g/Pparg/Cd36/Cdh13/Trem2
GO:2001185	regulation of CD8-positive, alpha-beta T cell activation	23	-0.675848	-1.80205	0.00197811	0.00197811	0.0125662	2180	tags=65%, list=16%, signal=55%	Lilrb4a/Runx3/H2-T22/Nckap1l/Irf1/Sh3rf1/H2-K1/Hfe/H2-D1/Vsir/H2-Q4/H2-Q7/H2-Q6/H2-T23/Cd274
GO:0071875	adrenergic receptor signaling pathway	20	-0.700522	-1.82527	0.0020105	0.0020105	0.0127534	2253	tags=55%, list=16%, signal=46%	Zdhhc21/Arrdc3/Adcy9/Rapgef2/Gnai2/Pde4b/Adrb2/Rgs2/Atp2b4/Kcnq1/Chga
GO:0007043	cell-cell junction assembly	99	-0.452387	-1.59951	0.00201375	0.00201375	0.0127554	1571	tags=30%, list=11%, signal=27%	Ctnna1/Hipk1/Cldn34c1/Micall2/Ctnnb1/Cd9/Actn4/Ikbkb/Gja1/Cldn15/Ace/Pkp4/Pkp3/Tjp1/Epha2/Il1b/Afdn/Cldn5/Jup/Ramp2/Pecam1/Prkch/Cav1/Cdh13/Esam/Cdh5/F11r/Gja5/Aplnr/Hopx
GO:0055117	regulation of cardiac muscle contraction	48	-0.556777	-1.75028	0.00202202	0.00202202	0.0127892	1525	tags=31%, list=11%, signal=28%	Pde4b/Rgs2/Dmd/Ehd3/Stc1/Cacna1h/Kcnj2/Agrn/Jup/Kcnq1/Cav1/Gja5/Atp1a2/Chga/Casq2
GO:0001912	positive regulation of leukocyte mediated cytotoxicity	44	-0.567283	-1.7537	0.00202976	0.00202976	0.0128196	2233	tags=50%, list=16%, signal=42%	Stat5b/Stx7/H2-T22/Raet1e/Tap2/Ptprc/Stap1/Mill2/Nectin2/P2rx7/H2-K1/Hfe/B2m/H2-D1/Spi1/Tyrobp/H2-Q4/H2-Q7/H2-T24/Gimap5/H2-Q6/H2-T23
GO:0002717	positive regulation of natural killer cell mediated immunity	23	-0.67434	-1.79803	0.00204939	0.00204939	0.0129248	1042	tags=43%, list=8%, signal=40%	Stat5b/H2-T22/Nectin2/H2-K1/H2-D1/H2-Q4/H2-Q7/Gimap5/H2-Q6/H2-T23
GO:0060048	cardiac muscle contraction	93	-0.459431	-1.59833	0.00205753	0.00205753	0.0129574	1525	tags=23%, list=11%, signal=20%	Pde4b/Rgs2/Map2k6/Dmd/Tnni2/Ehd3/Stc1/Cacna1h/Kcnj2/Agrn/Jup/Cxcr4/Kcnq1/Cav1/Kcna5/Gja5/Atp1a2/Chga/Abcc9/Casq2/Kcnj8
GO:0032504	multicellular organism reproduction	561	0.312635	1.33785	0.0020816	0.0020816	0.0130901	1714	tags=17%, list=12%, signal=15%	Vdr/Rbp4/Sfrp1/Fst/Rbm46/Lif/Drd4/Ptx3/Adamts16/Ptgis/Rpl39l/Bmpr1b/Tmem119/Cyp51/Ndn/Tnfaip6/Pla2g4a/Tyro3/Mcm8/Mdk/Runx1/Ccdc136/4930447C04Rik/Adamts2/Avpr1a/B4galnt1/Il11ra1/Ptgs2/Ttk/Inhba/Ptn/Aspm/H19/Top2a/M1ap/Pgm3/Trip13/Egfr/Igf1/Brip1/Spaca1/Meg3/Ddias/Abat/Ptprn/Fancf/Ttll5/Pafah1b3/Nkd1/Rad18/Ift20/Chtf18/Dnmt3l/Spata24/Sox9/Serpine2/Cip2a/Plk1/Pdgfra/Sh3pxd2b/Mastl/Suv39h2/Gas2/Mns1/…
GO:0009611	response to wounding	394	0.328628	1.36949	0.0020972	0.0020972	0.013165	1131	tags=18%, list=8%, signal=17%	Ecrg4/Timp1/Nrg1/Svep1/Comp/Ccl2/Slc1a3/Anxa8/Ccn4/Tnc/Arhgef19/Serpine1/Il33/Ephb2/Tafa5/Thbs1/F3/Tmem97/Col5a1/Abi3bp/Pla2g4a/Tyro3/Enpp1/Mdk/Fn1/Wnt5a/Col6a1/Prkca/Dcbld2/Smoc2/Fbln1/Slc1a2/Col3a1/Tfpi2/Ptn/Vkorc1/3300005D01Rik/Ptprs/Anxa1/Entpd2/Matn2/Fkbp10/Pdpn/F2r/Neo1/Lrp1/Tnfrsf12a/Igf1/Fgf2/Mmp2/Sulf2/Dhfr/Pak1/Tsku/Tpm1/Ptk7/Dtnbp1/Nol3/Ptprf/Pard3/Nfix/Arhgap24/Myh10/AI506816/Vegfa/Se…
GO:0032835	glomerulus development	60	-0.507062	-1.67314	0.00210844	0.00210844	0.013165	2244	tags=48%, list=16%, signal=41%	Lamb2/Wwtr1/Cflar/Kirrel3/Ret/Il6ra/Ptpro/Foxc1/Cd24a/Ctnnd1/Bmp4/Angpt2/Cd2ap/Actn4/Pdgfd/Notch1/Ahr/Notch3/Mef2c/Prom1/Mtss1/C3ar1/Tek/Pdgfb/Agtr2/Enpep/Gpr4/Ednrb/Aqp1
GO:0009163	nucleoside biosynthetic process	13	0.758642	1.80593	0.00210863	0.00210863	0.013165	2277	tags=62%, list=17%, signal=51%	Ak1/Dnph1/Tk1/Adk/Dtymk/Ada/Mtap/Dctd
GO:0034404	nucleobase-containing small molecule biosynthetic process	13	0.758642	1.80593	0.00210863	0.00210863	0.013165	2277	tags=62%, list=17%, signal=51%	Ak1/Dnph1/Tk1/Adk/Dtymk/Ada/Mtap/Dctd
GO:0006029	proteoglycan metabolic process	70	0.4991	1.68151	0.00210863	0.00210863	0.013165	2259	tags=41%, list=16%, signal=35%	Col11a1/Chpf/Acan/Igf1/Ugdh/Sulf2/Sulf1/Chst10/Chsy3/Pxylp1/Csgalnact1/Dse/Dsel/Hs3st3a1/Gpc1/Hs6st1/Hs2st1/Chst12/Slc35b2/Ext1/Adamts12/Slc2a10/Chsy1/Chpf2/Hgsnat/B3galt6/B4galt7/Arsb/Galns
GO:0050727	regulation of inflammatory response	273	-0.353154	-1.40767	0.00212175	0.00212175	0.013228	2041	tags=30%, list=15%, signal=26%	Adam8/H2-T22/Nlrp10/Trpv4/Pdcd4/Tlr4/Tnf/Akna/Cd24a/Sbno2/Tnfaip8l2/Socs3/Lgals9/Il16/Nlrp3/Ccl3/Tgfb1/Alox5ap/Plcg2/Stap1/Il10/Tnfrsf1b/Git1/Il20rb/Lpl/Gprc5b/Hyal2/Tlr2/Nmi/Enpp3/Adora2a/Pf4/Sema7a/Ccr5/Uaca/H2-K1/Tafa3/Irgm2/Csf1r/Rb1/Ets1/Osm/H2-D1/Tnfrsf11a/Ahr/Ifi35/Mgll/Fcgr3/Aoah/Il10ra/Fcer1g/Nod2/Ptpn6/Pik3ap1/Igtp/Pglyrp1/Lyn/Bst1/Pparg/Il1b/Pik3cg/Fcgr2b/Fabp4/Ctss/H2-Q4/Ctla2a/Cx3cr1…
GO:0042471	ear morphogenesis	93	0.462415	1.62243	0.00213616	0.00213616	0.0132988	996	tags=27%, list=7%, signal=25%	Cthrc1/Prrx2/Aldh1a3/Col11a1/Osr1/Ephb2/Lrig3/Fzd2/Eya4/Enpp1/Wnt5a/Ror2/Prrx1/Fgfr1/Sobp/Tbx18/Osr2/Ttc39c/Ptk7/Six2/Fzd3/Gbx2/Lrig1/Sox9/Six1
GO:0002702	positive regulation of production of molecular mediator of immune response	115	-0.441549	-1.58368	0.002154	0.002154	0.0133908	1645	tags=32%, list=12%, signal=29%	Cd27/Nlrp3/Irf5/Tgfb1/Ptprc/Plcg2/Cd86/Nod1/Cd37/Il10/Cd40/Kmt5b/Gprc5b/Tlr2/Sema7a/P2rx7/H2-K1/Syk/B2m/H2-D1/Cd74/Tnfsf13/Fcer1g/Nod2/Laptm5/Il1b/Trim6/Tek/H2-Q4/Tlr3/H2-Q7/Cd36/Kit/Gimap5/H2-Q6/H2-T23/Rsad2
GO:0071827	plasma lipoprotein particle organization	25	-0.658719	-1.81678	0.00217513	0.00217513	0.0135028	1316	tags=40%, list=10%, signal=36%	Plagl2/Lpl/Abca7/Pla2g7/Apoe/Abcg1/Abca1/Gpihbp1/Pltp/Scarb1
GO:0006821	chloride transport	49	-0.540793	-1.70503	0.00218948	0.00218948	0.0135726	1682	tags=39%, list=12%, signal=34%	Clic4/Slc4a8/Pacc1/Slc12a2/Lrrc8a/P2ry6/Clcn3/Slc12a6/Slc12a9/Slc12a7/Abcb1b/Clca2/Clic5/Slc12a5/Car7/Car2/Slc1a1/Ano1/Abcb1a
GO:0061035	regulation of cartilage development	59	0.520007	1.69448	0.00221197	0.00221197	0.0136925	1631	tags=41%, list=12%, signal=36%	Ccn4/Scx/Shox2/Ctsk/Loxl2/Mdk/Wnt5a/Pkdcc/Ccn2/Ltbp3/Prkg2/Wnt9a/Chadl/Six2/Bmp1/Gli3/Sox9/Lnpk/Tgfb2/Runx2/Gli2/Adamts12/Fgf18/Mkx
GO:0043301	negative regulation of leukocyte degranulation	11	-0.786526	-1.77931	0.00223727	0.00223727	0.0138295	2252	tags=73%, list=16%, signal=61%	Abr/Bcr/Nckap1l/Lgals9/Spi1/Cd300a/Cd84/Ccr2
GO:0046629	gamma-delta T cell activation	14	-0.756672	-1.78832	0.00224404	0.00224404	0.0138487	2343	tags=57%, list=17%, signal=47%	Lck/Stat5b/Nckap1l/Ptprc/Syk/Jag2/Sox13/Gimap5
GO:1903305	regulation of regulated secretory pathway	104	-0.443938	-1.5812	0.00224673	0.00224673	0.0138487	2267	tags=35%, list=16%, signal=29%	Fes/Stxbp2/Abr/Pld2/Bcr/Npy1r/Slc4a8/Rab27a/Stxbp5/Nckap1l/Gnai2/Lgals9/P2ry2/Git1/Gata2/Git2/Bcl2l1/P2rx7/Syt15/Cacna1h/Itgb2/Syk/Notch1/Rac2/Ptafr/Spi1/Fcer1g/Syt7/Lyn/Rph3al/Cd300a/Kcnb1/Cd84/Prkcb/Unc13b/Ccr2
GO:0006942	regulation of striated muscle contraction	59	-0.517325	-1.70119	0.0022725	0.0022725	0.0139878	1525	tags=25%, list=11%, signal=23%	Pde4b/Rgs2/Dmd/Ehd3/Stc1/Cacna1h/Kcnj2/Agrn/Jup/Kcnq1/Cav1/Gja5/Atp1a2/Chga/Casq2
GO:0048706	embryonic skeletal system development	114	0.432951	1.557	0.00229386	0.00229386	0.0140993	1744	tags=32%, list=13%, signal=29%	Rbp4/Twist2/Prrx2/Col11a1/Twist1/Osr1/Scx/Shox2/Col1a1/Wnt5a/Tbx15/Tgfb3/Pcsk5/Alx4/Prrx1/Wnt9a/Sulf2/Sulf1/Osr2/Hoxc6/Six2/Gli3/Hoxc9/Six1/Pdgfra/Tgfb2/Hsd17b7/Runx2/Mdfi/Mthfd1l/Mmp16/Ext1/Gas1/Pcgf2/Slc2a10/Six4/Mmp14
GO:0007259	receptor signaling pathway via JAK-STAT	117	-0.422991	-1.52449	0.00230333	0.00230333	0.0141376	2373	tags=34%, list=17%, signal=29%	Gadd45a/Lck/Stat5b/Adipor1/Tyk2/Jak2/Ep300/Ret/Fyn/Il6ra/Tnf/Inpp5f/Socs3/Ptprc/Parp9/Il10/Cd40/Fgfr3/Irf1/Stat1/Jak3/Stat2/Nlk/Il15/Csf1r/Notch1/Osm/Il10ra/Il10rb/Il7r/Sh2b3/Lyn/Cd300a/Csf2rb2/Pecam1/Parp14/Cav1/Kit/Hcls1/Csf2rb
GO:0032728	positive regulation of interferon-beta production	43	-0.564149	-1.7209	0.0023168	0.0023168	0.0142003	4190	tags=70%, list=30%, signal=49%	Oas3/Trim65/Oas1g/Polr3a/Tlr8/Irf3/Polr3f/Oas1c/Rnf135/Ifnar1/Ptpn22/Zc3hav1/Mavs/Traf3ip3/Zbtb20/Polr3c/Ddx3x/Tbk1/Tlr7/Tlr4/Arrdc4/Irf1/Ifih1/Tlr2/Trim56/Oas2/Oas1a/Isg15/Irf7/Tlr3
GO:0042100	B cell proliferation	66	-0.500563	-1.67584	0.00236558	0.00236558	0.0144789	2828	tags=52%, list=21%, signal=41%	Card11/Tirap/Bcl2/Cd81/Cdkn1a/Cd180/Rc3h1/Gpr183/Fosl2/Sash3/Pawr/Tlr4/Cd24a/Nckap1l/Slc39a10/Cd27/Ptprc/Il10/Tnfrsf13b/Cd40/Pkn1/Cd74/Ahr/Il7r/Tyrobp/Lyn/Inpp5d/Bst1/Cd300a/Fcgr2b/Mef2c/Tnfrsf21/Cd38/Ighm
GO:0046503	glycerolipid catabolic process	37	-0.587512	-1.7407	0.00240428	0.00240428	0.0146951	1890	tags=43%, list=14%, signal=37%	Plcg1/Inpp5f/Enpp2/Gdpd3/Sorl1/Lpl/Mgll/Gdpd1/Pnpla2/Plcb1/Pla2g7/Pik3cg/Lipe/Apoc2/Gpihbp1/Scarb1
GO:0170038	proteinogenic amino acid biosynthetic process	35	0.589089	1.75905	0.00240907	0.00240907	0.0147038	2043	tags=37%, list=15%, signal=32%	Phgdh/Plod2/Ass1/Pycr1/Aldh18a1/Dhfr/Gls2/Plod3/Psat1/Mri1/Mthfd1/Shmt2/Mtap
GO:0032479	regulation of type I interferon production	112	-0.439262	-1.56731	0.00242168	0.00242168	0.0147601	3237	tags=48%, list=24%, signal=37%	Polr3a/Tlr8/Irf3/Ticam2/Traf3ip1/Rab2b/Polr3f/Siglec1/Oas1c/Rnf135/Atg12/Ifnar1/Crebbp/Traf6/Ptpn22/Tirap/Morc3/Zc3hav1/Mavs/Traf3ip3/Zbtb20/Polr3c/Nmb/Mmp12/Ddx3x/Tbk1/Dhx58/Tlr7/Tlr4/Tank/Arrdc4/Irf5/Plcg2/Irf1/Ifih1/Tlr2/Stat1/Nmi/Trim56/Oas2/Cd14/Rnf125/Irgm2/Syk/Oas1a/Irf8/Tyrobp/Igtp/Isg15/Xaf1/Irf7/Tlr3/Irgm1/Gbp4
GO:0032816	positive regulation of natural killer cell activation	30	-0.6204	-1.76566	0.00242736	0.00242736	0.0147644	2233	tags=50%, list=16%, signal=42%	Stat5b/Tyk2/Jak2/H2-T22/Bloc1s6/Irf1/H2-K1/Il15/H2-D1/Tyrobp/Flt3l/H2-Q4/H2-Q7/H2-Q6/H2-T23
GO:0031333	negative regulation of protein-containing complex assembly	138	-0.413908	-1.53069	0.00243336	0.00243336	0.0147644	2100	tags=36%, list=15%, signal=30%	Fbxl2/Raf1/Jam3/Rdx/Twf2/Stxbp1/Flii/Map2/Myadm/Ddx3x/Ep300/Tmod3/Trim11/Bbs4/Evl/Arhgef2/Tmsb4x/Kank1/Sptan1/Ifi206/Tmod1/Sorl1/Ifi207/Ctnnbip1/Ssh2/Mndal/Tlr2/Sptbn1/Nop53/Irgm2/Clu/Hip1r/Arhgef7/Ifi209/Stmn2/Igtp/Ifi203/Tmc8/Xaf1/Trim30a/Pecam1/Kank3/Svip/Lmod1/Irgm1/Cdh5/Trem2/Ifi213/Ifi208
GO:0060070	canonical Wnt signaling pathway	243	0.362492	1.42902	0.00243613	0.00243613	0.0147644	1175	tags=18%, list=9%, signal=16%	Sfrp1/Sfrp2/Cthrc1/Cdh3/Nkd2/Rspo3/Wnt5b/Fzd2/Tnn/Col1a1/Mdk/Wnt5a/Col6a1/Wnt11/Tpbg/Ror2/Aspm/Rbms3/Wnt9a/Dact1/Bicc1/Fzd1/Egfr/Nphp4/Fgf2/Sulf2/Tbx18/Fzd5/Dact3/Ptk7/Gli3/Fzd3/Siah1b/Nkd1/Ift20/Sema5a/Cdk14/Dkk3/Sox9/Sdc1/Pygo1/Wls/Dkk2
GO:0097581	lamellipodium organization	82	-0.466256	-1.59843	0.00243882	0.00243882	0.0147644	2682	tags=40%, list=19%, signal=33%	Twf2/Actr2/Nckap1/Fscn1/Fgd4/Cyfip1/Whamm/Nck2/Spef1/Coro1b/Akirin1/Ptpro/Wasf2/Kank1/Enpp2/Nck1/P2ry12/Rreb1/Pxn/Plekho1/Spata13/Arhgef7/Rac2/Epha2/S1pr1/Parvb/Ablim1/Abi3/Kit/Cdh13/Ablim3/Aqp1/Was
GO:0071825	protein-lipid complex organization	28	-0.630215	-1.77225	0.00243934	0.00243934	0.0147644	1316	tags=36%, list=10%, signal=32%	Plagl2/Lpl/Abca7/Pla2g7/Apoe/Abcg1/Abca1/Gpihbp1/Pltp/Scarb1
GO:0198738	cell-cell signaling by wnt	353	0.337648	1.38856	0.00245092	0.00245092	0.014814	1625	tags=19%, list=12%, signal=17%	Sfrp1/Sfrp2/Cthrc1/Cdh3/Ccn4/Nkd2/Cmah/Rspo3/Wnt5b/Fzd2/Tnn/Enpp1/Col1a1/Mdk/Wnt5a/Col6a1/Wnt11/Tpbg/Ror2/Ccne1/Aspm/Rbms3/Tiam1/Wnt9a/Lrp1/Dact1/Bicc1/Fzd1/Egfr/Nphp4/Fgf2/Sulf2/Sulf1/Tbx18/Fzd5/Dact3/Tsku/Ptk7/Gli3/Rac3/Fzd3/Siah1b/Nkd1/Nfatc4/Ift20/Sema5a/Cdk14/Dkk3/Sox9/Vax2/Cd44/Sdc1/Ryk/Pygo1/Wls/Dkk2/Mdfi/Cdh2/Ext1/Cpz/Tmem9/Tert/Src/Apcdd1/Ppp2r3a/Snai1
GO:0010524	positive regulation of calcium ion transport into cytosol	13	-0.758984	-1.78779	0.00247708	0.00247708	0.0149019	1470	tags=46%, list=11%, signal=41%	Bmp4/P2rx7/Cav1/Gimap5/Trpc3/Akap5
GO:0010171	body morphogenesis	54	0.535748	1.7462	0.00247833	0.00247833	0.0149019	1242	tags=20%, list=9%, signal=19%	Grem2/Twist2/Scx/Col1a1/Tgfb3/Mab21l2/Mmp2/Pdgfra/Asph/Tgfb2/Crispld2
GO:1904415	regulation of xenophagy	12	-0.775665	-1.78913	0.00247916	0.00247916	0.0149019	2239	tags=75%, list=16%, signal=63%	Rnf31/Tbk1/Nod1/Tlr2/Mapk3/Irgm2/Nod2/Igtp/Irgm1
GO:1904417	positive regulation of xenophagy	12	-0.775665	-1.78913	0.00247916	0.00247916	0.0149019	2239	tags=75%, list=16%, signal=63%	Rnf31/Tbk1/Nod1/Tlr2/Mapk3/Irgm2/Nod2/Igtp/Irgm1
GO:0032787	monocarboxylic acid metabolic process	449	0.320988	1.35067	0.0024867	0.0024867	0.0149267	2362	tags=25%, list=17%, signal=21%	Aldh1a3/Aldh1a2/Slc1a3/Slc16a3/Twist1/Rbp1/Echdc2/Phgdh/Ptges/Ephx2/Ptgis/Bdh2/Brca1/Ptgr1/Pla2g4a/Nupr1/Crabp2/Enpp1/Cyp1b1/Col6a1/Avpr1a/Sphk1/Ptgs2/Aldh1l2/Hk2/C1qtnf2/Anxa1/Acot11/Slc27a6/Pdpn/Me1/Mif/Igf1/Tpi1/Hacd1/Pdk3/Galk1/Pgk1/C3/Abat/Pgam1/Hpgd/Dse/Fasn/Dsel/Aldh1a1/Eno1/Cyp7b1/Nucb2/Sox9/Grhpr/Slc4a4/Nudt19/Gale/Scd1/Fads1/Idh2/Pcx/Phyh/Fads2/Chst12/Pon3/Mthfd1l/Star/Elovl6/Slc16a1/Ad…
GO:0141086	negative regulation of inflammasome-mediated signaling pathway	25	-0.65558	-1.80813	0.00249343	0.00249343	0.0149465	1538	tags=48%, list=11%, signal=43%	Ifi206/Ifi207/Mndal/Irgm2/Ifi209/Igtp/Ifi203/Trim30a/Irgm1/Trem2/Ifi213/Ifi208
GO:2000516	positive regulation of CD4-positive, alpha-beta T cell activation	35	-0.5835	-1.70078	0.00251941	0.00251941	0.0150815	1743	tags=46%, list=13%, signal=40%	Card11/Cd81/Rara/Sash3/Cd24a/Nckap1l/Nlrp3/Irf1/Cd83/Nfkbid/Hlx/Il2rg/Ccr2/Irgm1/Gimap5/Ccr7
GO:0051984	positive regulation of chromosome segregation	28	0.636254	1.81813	0.00253029	0.00253029	0.0151139	2002	tags=50%, list=15%, signal=43%	Birc5/Ncapg2/Ncapg/Cdk1/Incenp/Cdca8/Rad18/Aurkb/Smc2/Cenpe/Cdc6/Ncaph/Smc4/Ncapd3
GO:2000050	regulation of non-canonical Wnt signaling pathway	24	0.660252	1.84365	0.00253176	0.00253176	0.0151139	894	tags=29%, list=6%, signal=27%	Sfrp1/Sfrp2/Rspo3/Wnt5a/Tiam1/Dact1/Nkd1
GO:0046697	decidualization	20	0.69128	1.82156	0.00254094	0.00254094	0.0151479	447	tags=30%, list=3%, signal=29%	Lif/Ptgis/Pla2g4a/Il11ra1/Ptgs2/Ptn
GO:0002715	regulation of natural killer cell mediated immunity	37	-0.586062	-1.7364	0.0025511	0.0025511	0.0151877	1663	tags=43%, list=12%, signal=38%	Tap2/Lgals9/Tgfb1/Tap1/Nectin2/H2-K1/H2-D1/Clec2d/Ceacam1/H2-Q4/Igf2/H2-Q7/Gimap5/H2-Q6/Pik3r6/H2-T23
GO:0043330	response to exogenous dsRNA	31	-0.620605	-1.77503	0.00256417	0.00256417	0.0152447	1226	tags=35%, list=9%, signal=32%	Zc3hav1/Mavs/Rftn1/Ralb/Ifih1/Stat1/Mapk3/Nod2/Tlr3/Cav1/Kcnj8
GO:0019722	calcium-mediated signaling	147	-0.405999	-1.51669	0.00257676	0.00257676	0.0152987	1890	tags=27%, list=14%, signal=23%	Plcg1/Tspan18/Tnf/Rcan2/Cd24a/P2ry12/Ptprc/Plcg2/Ackr3/Lat2/Dmd/Ccrl2/Lmcd1/Ccr5/Orai1/Irgm2/Syk/L1cam/Igtp/Atp2b4/Bst1/Car8/Chp2/Cxcr4/C3ar1/Cx3cr1/Ccr2/Irgm1/Cdh13/Nr5a2/Trem2/Kdr/Ednrb/Ramp3/Calcr/Ccr7/Akap5/Casq2/Kcnj8
GO:0019886	antigen processing and presentation of exogenous peptide antigen via MHC class II	17	-0.725985	-1.82498	0.00261981	0.00261981	0.0155332	2182	tags=88%, list=16%, signal=74%	H2-Oa/Lgmn/Traf6/H2-DMb1/H2-Ob/H2-Eb1/Unc93b1/H2-DMa/H2-Aa/B2m/Cd74/H2-Ab1/Fcer1g/Fcgr2b/Ctss
GO:0045742	positive regulation of epidermal growth factor receptor signaling pathway	20	-0.690231	-1.79846	0.00267483	0.00267483	0.0158304	2933	tags=60%, list=21%, signal=47%	Esr1/Plaur/Hap1/Shkbp1/Adam17/Ralb/Dgkd/Tgfb1/Hip1/Hip1r/Afap1l2/Neu3
GO:1902750	negative regulation of cell cycle G2/M phase transition	64	0.497807	1.65747	0.00267722	0.00267722	0.0158304	2392	tags=36%, list=17%, signal=30%	Clspn/Brca1/Orc1/Dtl/Ticrr/Blm/Creb3l1/Cdk1/Pkmyt1/Plk1/Donson/Atf5/Bard1/Cdk5rap3/Brsk1/Ier3/Cdc6/Rint1/Atm/Chek1/Topbp1/Rbbp8/Rad50
GO:0009100	glycoprotein metabolic process	281	0.3495	1.41189	0.00268502	0.00268502	0.0158551	2734	tags=32%, list=20%, signal=26%	Galnt17/Col11a1/Ptx3/Il33/Fbxo27/Galnt16/B3gnt9/Gfpt2/Mgat3/Mlec/Fbxo17/Gmppb/Pmm1/Chpf/Galnt5/Pgm3/Acan/Igf1/Ugdh/Ostc/Sulf2/Sulf1/Chst10/Chsy3/Pxylp1/Csgalnact1/Dse/Dsel/Ddost/Hs3st3a1/Itm2a/Gxylt2/Rpn1/Pofut2/Gfpt1/St8sia2/Gpc1/Dad1/Soat1/Hs6st1/Hs2st1/Phlda1/Pomt2/Chst12/Prkcsh/Uggt2/Slc35b2/Tmem258/Ext1/Pcsk6/Rpn2/B3galnt1/Adamts12/Stt3a/Alg5/Alg9/Slc2a10/Plod3/Mogs/Chsy1/Chpf2/Lmf1/Hgsnat/H…
GO:0032414	positive regulation of ion transmembrane transporter activity	61	-0.51485	-1.70473	0.00269014	0.00269014	0.0158616	1592	tags=31%, list=12%, signal=28%	Stac/Plcg2/Adrb2/Atp1b3/Dmd/Cnksr3/Ikbkb/Ehd3/Gstm7/Abcb1b/Plcb1/Chp2/Ctss/Shank3/Atp1b2/Trem2/Lrrc55/Abcb1a/Tesc
GO:0022603	regulation of anatomical structure morphogenesis	737	-0.292649	-1.27365	0.00269341	0.00269341	0.0158616	2118	tags=26%, list=15%, signal=23%	Lgals3/Slc23a2/Apc/Ep300/Akt3/Tbx2/Foxj2/Numb/Cd59a/Epb41/Ret/Msn/Fam171a1/Rxra/Lst1/Cxcl10/Btbd7/Fyn/Gna12/Plcg1/Mark2/Tspan18/Sema4d/Tmbim1/Coro1a/Coro1b/Rapgef2/Tnf/Foxc1/Lrg1/Sp1/Wnk1/Prag1/Bmp2/Kank1/Anxa7/Id1/Nras/Enpp2/Sash1/Ccl3/Tgfb1/Slc12a2/Brwd3/Lzts1/Cdc42se2/Adrb2/Bmp4/Rgcc/Pink1/Angpt2/Rreb1/Ctnnb1/Il10/Cxcl12/Myo10/Ago1/Syne3/Erap1/Smad1/Hecw2/Celsr1/Cd40/H2-DMa/Ecscr/Dab2ip/Hspb1/…
GO:0055021	regulation of cardiac muscle tissue growth	66	0.496976	1.65401	0.00272212	0.00272212	0.016009	746	tags=21%, list=5%, signal=20%	Rbp4/Nrg1/Ccn4/Col14a1/Zfpm2/Kcnk2/Fdps/Bmpr1a/Ncam1/Fgfr1/Igf1/Fgf2/Cdk1/Pak1
GO:0003401	axis elongation	30	0.628469	1.83069	0.00273341	0.00273341	0.0160538	1722	tags=37%, list=13%, signal=32%	Sfrp1/Sfrp2/Tnc/Wnt5a/Wnt11/Ptk7/Nkd1/Sox9/Six1/Ppp2r3a/Six4
GO:0050857	positive regulation of antigen receptor-mediated signaling pathway	24	-0.656973	-1.7797	0.00275688	0.00275688	0.0161698	1918	tags=46%, list=14%, signal=40%	Usp12/Slc39a10/Ptprc/Lipa/Nfam1/Stap1/Nectin2/Prkd2/Prkcb/Prkch/Ccr7
GO:0099177	regulation of trans-synaptic signaling	366	-0.330421	-1.36111	0.0027733	0.0027733	0.0162443	2252	tags=26%, list=16%, signal=23%	Abr/Iqsec1/Zzef1/Hrh1/Cyfip1/Rin1/Jak2/Bcr/Lnpep/Npy1r/Pnkd/Slc4a8/Nr3c1/Ophn1/Pde9a/Fyn/Grk2/Plcg1/Stxbp5/Rapgef2/Tnf/Htr7/Wnk1/Dlgap3/Gnai2/Chmp2b/Cplx2/Myo6/Slc12a2/Lzts1/Adrb2/Pink1/Nrgn/Eif4ebp2/Cd2ap/P2ry2/Dgkz/Git1/Rnf167/Cln3/Git2/Bcl2l1/Adora2a/Slc6a6/Plcb4/Hip1/Mapk3/P2rx7/Glul/Ace/Ica1/Zdhhc2/Rapsn/Sncaip/Mctp1/Itpr3/Mgll/Sncg/L1cam/Agrn/Rapgef4/Tyrobp/Pirb/Syt7/Cyth1/Sybu/Il1b/Afdn/Ep…
GO:0050729	positive regulation of inflammatory response	116	-0.431992	-1.55003	0.00281115	0.00281115	0.0164439	2041	tags=40%, list=15%, signal=34%	Adam8/H2-T22/Nlrp10/Trpv4/Pdcd4/Tlr4/Tnf/Cd24a/Il16/Nlrp3/Ccl3/Tgfb1/Alox5ap/Plcg2/Stap1/Lpl/Gprc5b/Hyal2/Tlr2/Nmi/Ccr5/H2-K1/Tafa3/Csf1r/Ets1/Osm/H2-D1/Tnfrsf11a/Ifi35/Fcgr3/Fcer1g/Il1b/Pik3cg/Fabp4/Ctss/H2-Q4/H2-Q7/Pde2a/Ccr2/Fcgr1/Aim2/H2-Q6/H2-T23/Trem2/Gpr4/Ccr7
GO:0032680	regulation of tumor necrosis factor production	161	-0.394071	-1.49444	0.00283346	0.00283346	0.0165522	2954	tags=43%, list=21%, signal=34%	Cd47/Akap8/Ptpn22/Arid5a/Lrrk2/Arrb2/Cyp2j6/Tirap/Bcl3/Zfp36/Nfkbil1/Gpnmb/Mavs/Rara/Zbtb20/Zc3h12a/Tmem106a/Lilrb4a/Jak2/Sash3/H2-T22/Tlr4/Arhgef2/Tlr1/Cd24a/Ly96/Lgals9/Ccl3/Tgfb1/Ptprc/Plcg2/Nod1/Il10/Ifngr1/Hspb1/Lpl/Ifih1/Tlr2/Ccr5/Oas2/H2-K1/Cd14/Il27ra/Clu/Syk/Csf1r/H2-D1/Ptafr/Fcgr3/Fcer1g/Nod2/Ptpn6/Oas1a/Tyrobp/Fcgr2b/Cd84/Trim30a/Vsir/H2-Q4/Cx3cr1/Tlr3/H2-Q7/Ccr2/Cd36/H2-Q6/Cybb/H2-T23…
GO:0050804	modulation of chemical synaptic transmission	365	-0.331378	-1.3648	0.00284201	0.00284201	0.0165799	2252	tags=26%, list=16%, signal=23%	Abr/Iqsec1/Zzef1/Hrh1/Cyfip1/Rin1/Jak2/Bcr/Lnpep/Npy1r/Pnkd/Slc4a8/Nr3c1/Ophn1/Pde9a/Fyn/Grk2/Plcg1/Stxbp5/Rapgef2/Tnf/Htr7/Wnk1/Dlgap3/Gnai2/Chmp2b/Cplx2/Myo6/Slc12a2/Lzts1/Adrb2/Pink1/Nrgn/Eif4ebp2/Cd2ap/P2ry2/Dgkz/Git1/Rnf167/Cln3/Git2/Bcl2l1/Adora2a/Slc6a6/Plcb4/Hip1/Mapk3/P2rx7/Glul/Ace/Ica1/Zdhhc2/Rapsn/Sncaip/Mctp1/Itpr3/Mgll/Sncg/L1cam/Agrn/Rapgef4/Tyrobp/Pirb/Syt7/Cyth1/Sybu/Il1b/Afdn/Ep…
GO:0032964	collagen biosynthetic process	56	0.526714	1.71229	0.00286257	0.00286257	0.016659	1677	tags=39%, list=12%, signal=35%	Ccl2/Rcn3/Serpine1/Scx/Col5a1/P3h3/Col1a1/Fn1/Tgfb3/Inhba/Emilin1/Ccn2/P3h4/F2r/Prdx5/Creb3l1/Serpinh1/Ltbp1/Gli2/Adamts3/Mkx/Ddr2
GO:0071674	mononuclear cell migration	145	-0.401891	-1.49493	0.00287095	0.00287095	0.016659	2174	tags=39%, list=16%, signal=33%	Gpr183/Lgals3/Dock8/Dusp1/Adam17/Adam8/Plec/Myo1g/Msn/Trpv4/Cxcl10/Coro1a/Akirin1/Ptpro/Wnk1/Lgals9/Ccl12/Ccl3/Tgfb1/Mospd2/Slc12a2/Cxcl12/C5ar1/Adam10/Mapk3/Il27ra/Ccl9/Pdgfd/Csf1r/Ccl8/Slc8b1/Aif1/Spi1/Lrch1/Lyn/Arhgef5/Spns2/Plcb1/Pla2g7/Stk10/Flt1/C3ar1/S1pr1/Pecam1/Cx3cr1/Itga4/Pdgfb/Ccr2/Jam2/Ch25h/Cd200/Slamf9/F11r/Msmp/Ccl6/Ccr7
GO:0010632	regulation of epithelial cell migration	211	-0.372474	-1.44845	0.00287336	0.00287336	0.016659	2373	tags=38%, list=17%, signal=32%	Gadd45a/Ptk2/Gata3/Rab11a/Rras/Iqsec1/Krit1/Zc3h12a/Adipor1/Macf1/Tgfbr3/Hdac7/Apc/Akt3/Adam17/Evl/Plcg1/Patz1/Tnf/Pik3c2a/Sp1/Meox2/Enpp2/Sash1/Tgfb1/Plcg2/Nr2f2/Hdac5/Bmp4/Rgcc/Angpt2/Rreb1/Cd40/Atoh8/Dab2ip/Hspb1/Gata2/Jcad/Flt4/Col18a1/Glul/Stc1/Ptprm/Nrp1/Notch1/Ets1/Ppm1f/Prkd2/Pik3cb/Alox12/Plpp3/Epha2/Atp2b4/Vegfc/Vash1/Sp100/Ceacam1/Pparg/Adamts9/Itga3/Prcp/Ptprg/Pik3cg/Mef2c/Jup/Ptprr/R…
GO:0000768	syncytium formation by plasma membrane fusion	53	-0.530945	-1.68632	0.00287469	0.00287469	0.016659	2369	tags=47%, list=17%, signal=39%	Cd81/Cxcl9/Casp1/Dyrk1b/Cflar/Adam8/Cxcl10/Sbno2/Cd109/Tanc1/Cxcl12/Cd9/Tmem182/Stat1/Gdf15/Plekho1/Dock2/Ccl8/Scgb3a1/Tyrobp/Flt3l/Cd53/Rapgef3/Ehd2/Trem2
GO:0140253	cell-cell fusion	53	-0.530945	-1.68632	0.00287469	0.00287469	0.016659	2369	tags=47%, list=17%, signal=39%	Cd81/Cxcl9/Casp1/Dyrk1b/Cflar/Adam8/Cxcl10/Sbno2/Cd109/Tanc1/Cxcl12/Cd9/Tmem182/Stat1/Gdf15/Plekho1/Dock2/Ccl8/Scgb3a1/Tyrobp/Flt3l/Cd53/Rapgef3/Ehd2/Trem2
GO:0140115	export across plasma membrane	39	-0.578623	-1.72507	0.0028872	0.0028872	0.0167039	1388	tags=36%, list=10%, signal=32%	Atp1b3/Abcg2/Abcc4/Gja1/Abcb1b/Agrn/Kcnb1/Slc30a1/Abca1/Kcnq1/Atp1b2/Kcna5/Abcb1a/Atp1a2
GO:0086004	regulation of cardiac muscle cell contraction	26	-0.641078	-1.78467	0.0028901	0.0028901	0.0167039	970	tags=35%, list=7%, signal=32%	Pde4b/Stc1/Cacna1h/Kcnj2/Jup/Cav1/Gja5/Atp1a2/Casq2
GO:0006949	syncytium formation	55	-0.521974	-1.68265	0.00291784	0.00291784	0.0168419	2369	tags=45%, list=17%, signal=38%	Cd81/Cxcl9/Casp1/Dyrk1b/Cflar/Adam8/Cxcl10/Sbno2/Cd109/Tanc1/Cxcl12/Cd9/Tmem182/Stat1/Gdf15/Plekho1/Dock2/Ccl8/Scgb3a1/Tyrobp/Flt3l/Cd53/Rapgef3/Ehd2/Trem2
GO:0031099	regeneration	132	0.417877	1.5414	0.00292173	0.00292173	0.016842	1178	tags=23%, list=9%, signal=22%	Nrg1/Lif/Tnc/Serpine1/Ccn3/Cxcl5/Enpp1/Thy1/Mdk/Col6a1/P2rx5/Ptn/Igsf10/Ptprs/Anxa1/Prrx1/Matn2/Neo1/Lrp1/Egfr/Igf1/Mmp2/Cdk1/Sulf2/Dhfr/Ptprf/Nfix/Ezh2/Hgf/Dusp10/Apod
GO:0061620	glycolytic process through glucose-6-phosphate	20	0.684962	1.80491	0.00296765	0.00296765	0.0170842	1839	tags=50%, list=13%, signal=43%	Tpi1/Galk1/Pgk1/Eno1/Gale/Pkm/Aldoa/Eno2/Eno1b/Gapdh
GO:0010563	negative regulation of phosphorus metabolic process	345	-0.337701	-1.38005	0.00299665	0.00299665	0.0171931	2695	tags=30%, list=20%, signal=25%	Zbed3/Ctdsp2/Pkia/Camk2n1/Lats2/Rd3/Met/Dgkq/Ogt/Cdkn1a/Terf2ip/Gadd45a/Myadm/Swap70/Prkag2/Kat2b/Wwtr1/Zc3h12a/Lilrb4a/Apc/Dusp1/Deptor/Nck2/Plec/Tigar/Cdkn1c/Mgat5/Gpd1l/Grk2/Sema4d/Ptpro/Tnf/Inpp5f/Cbl/Pkib/Spred2/Insr/Nckap1l/Bmp2/Cd109/Dusp7/Socs3/Nck1/Tgfb1/Ptprc/Gnaq/Ctdsp1/Pid1/Nr2f2/Stap1/Heg1/Inpp5k/Midn/Rgs2/Adar/Dab2ip/Adarb1/Hspb1/Git1/Cda/Dmd/Irf1/Cnksr3/Hyal2/Fbxo7/Ikbkb/Rassf2/Pkn…
GO:0045936	negative regulation of phosphate metabolic process	345	-0.337701	-1.38005	0.00299665	0.00299665	0.0171931	2695	tags=30%, list=20%, signal=25%	Zbed3/Ctdsp2/Pkia/Camk2n1/Lats2/Rd3/Met/Dgkq/Ogt/Cdkn1a/Terf2ip/Gadd45a/Myadm/Swap70/Prkag2/Kat2b/Wwtr1/Zc3h12a/Lilrb4a/Apc/Dusp1/Deptor/Nck2/Plec/Tigar/Cdkn1c/Mgat5/Gpd1l/Grk2/Sema4d/Ptpro/Tnf/Inpp5f/Cbl/Pkib/Spred2/Insr/Nckap1l/Bmp2/Cd109/Dusp7/Socs3/Nck1/Tgfb1/Ptprc/Gnaq/Ctdsp1/Pid1/Nr2f2/Stap1/Heg1/Inpp5k/Midn/Rgs2/Adar/Dab2ip/Adarb1/Hspb1/Git1/Cda/Dmd/Irf1/Cnksr3/Hyal2/Fbxo7/Ikbkb/Rassf2/Pkn…
GO:0019725	cellular homeostasis	610	-0.304599	-1.30939	0.00299841	0.00299841	0.0171931	2015	tags=20%, list=15%, signal=18%	Tcirg1/Rab11b/Slc4a8/Trpv4/Vps54/Cxcl10/Rab11fip5/Grk2/Plcg1/Coro1a/Mcoln1/Abcb7/Tmem178/Vps33a/Wnk1/Atp6v0d2/Anxa7/Atox1/Slc39a10/Chmp2b/Grina/Lrrc8d/Tgfb1/Atp6v0a1/Slc12a2/Ptprc/Plcg2/Lrrc8a/Klf7/Mink1/P2ry2/Atp1b3/Cd40/Git1/Bloc1s6/Dmd/Clcn3/Cln3/Tns2/Lrp5/Slc31a2/Ucp2/Slc24a5/Steap4/Cyb561/Plcb4/Ccr5/Mapk3/Slc12a6/Slc12a9/P2rx7/Glul/Stc1/Gstm7/Cdh23/Acacb/Hfe/Pde1c/Bmp6/Ccl8/B2m/Mtm1/Pim3/Slc…
GO:0045637	regulation of myeloid cell differentiation	188	-0.379708	-1.46868	0.003011	0.003011	0.0172426	1839	tags=29%, list=13%, signal=25%	Fam210b/Tnf/Tmem178/Csf3r/Nckap1l/Cdk6/Klf13/Klf10/Ccl3/Tgfb1/Ctnnb1/Gpr137b/Fgfr3/Ctnnbip1/Hoxa7/Csf3/Gata2/Stat1/Zfpm1/Rassf2/Hoxa5/Ccl9/Csf1r/Rb1/Ets1/B2m/Cd74/Tnfrsf11a/Rarg/Lmo2/Itpkb/Spi1/Prdm16/Tyrobp/Pirb/Clec2d/Hoxb8/Ceacam1/Lyn/Inpp5d/Isg15/Zbtb46/Ikzf1/Mef2c/Kitl/Inpp4b/C1qc/Dll1/Tal1/Zbtb16/Hcls1/Trem2/Car2/Tesc
GO:0006959	humoral immune response	113	-0.411762	-1.47588	0.00303518	0.00303518	0.0173583	2265	tags=37%, list=16%, signal=31%	Rnase6/Cfp/Gpr183/Lgals3/Cd59a/H2-T22/Masp1/Cxcl10/Tnf/Ptprc/Cr1l/Rgcc/Cd37/Cxcl12/H2-DMa/Pf4/H2-K1/Notch1/Ccl8/B2m/H2-D1/Nod2/Ptpn6/Pglyrp1/Il1b/C1qb/Spns2/C1qa/Wfdc17/Fcgr2b/Mef2c/C1qc/H2-Q4/H2-Q7/Tnfrsf21/Ccr2/Gimap5/H2-Q6/H2-T23/Trem2/Ighm/Ccr7
GO:0046486	glycerolipid metabolic process	288	-0.343454	-1.37577	0.00305237	0.00305237	0.0174134	2975	tags=31%, list=22%, signal=25%	Gpcpd1/Pgap2/Esr1/Inpp5b/Atg14/Pigt/Sacm1l/Agmo/Pld1/Pip4k2b/Pik3r3/Ip6k1/Cpt1a/Smg1/Mtmr2/Mtmr1/Plcb2/Dgkq/Fabp5/Synj1/Inpp5a/Vac14/Mtmr3/Bpnt1/Lypla2/Nr1h2/Pld2/Becn1/Acsl5/Pigq/Plcg1/Dgkd/Inpp5f/Pik3c2a/Enpp2/Socs3/Gdpd3/Lpcat4/Etnk1/Mtmr12/Plcg2/Pip5k1c/Lipa/Pnpla6/Inpp5k/Sorl1/Mboat2/Cish/Mtmr10/Dgkz/Mtmr11/Dgkh/Ttc7b/Lpl/Cln3/Inpp1/Dgka/Plcb4/Plek/Cdipt/Lpcat2/Mtm1/Tnxb/Pik3cb/Itpkb/Mgll/Cd…
GO:0017157	regulation of exocytosis	150	-0.405565	-1.52393	0.00305282	0.00305282	0.0174134	2877	tags=35%, list=21%, signal=28%	Lrrk2/Cadps2/S100a10/Itgam/Rab12/Stxbp1/Rap1a/Fbxl20/Hap1/Exoc2/Fes/Stxbp2/Abr/Pld2/Bcr/Npy1r/Slc4a8/Rab8b/Rab27a/Stxbp5/Nckap1l/Atp9a/Gnai2/Lgals9/Sdcbp/P2ry2/Git1/Gata2/Git2/Bcl2l1/P2rx7/Syt15/Cacna1h/Itgb2/Syk/Notch1/Atp13a2/Rac2/Ptafr/Spi1/Fcer1g/Rapgef4/Syt7/Lyn/Rph3al/Cd300a/Kcnb1/Cd84/Prkcb/Unc13b/Ccr2/Rab3b
GO:0046641	positive regulation of alpha-beta T cell proliferation	26	-0.637083	-1.77355	0.00310029	0.00310029	0.0176611	2909	tags=65%, list=21%, signal=52%	Ptpn22/Card11/Cd81/Tyk2/Jak2/H2-T22/Cd24a/Ptprc/H2-K1/Syk/H2-D1/H2-Q4/H2-Q7/Ccr2/Irgm1/H2-Q6/H2-T23
GO:0071880	adenylate cyclase-activating adrenergic receptor signaling pathway	14	-0.749034	-1.77027	0.00311975	0.00311975	0.0177487	2253	tags=57%, list=16%, signal=48%	Arrdc3/Adcy9/Rapgef2/Gnai2/Pde4b/Adrb2/Atp2b4/Chga
GO:0048562	embryonic organ morphogenesis	225	0.364284	1.42467	0.00315	0.00315	0.0178975	1746	tags=26%, list=13%, signal=23%	Rbp4/Twist2/Mfap5/Cthrc1/Prrx2/Aldh1a3/Aldh1a2/Col11a1/Twist1/Osr1/Ephb2/Lrig3/Fzd2/Shox2/Eya4/Stil/Enpp1/Mfap2/Wnt5a/Tbx15/Tgfb3/Wnt11/Ror2/Alx4/Prrx1/Wnt9a/Fgfr1/Sobp/Tbx18/Fzd5/Osr2/Ttc39c/Ptk7/Six2/Gli3/Fzd3/Hoxc9/Aldh1a1/Gbx2/Lrig1/Sox9/Six1/Pdgfra/Vax2/Tgfb2/Tead1/Runx2/Mdfi/Mthfd1l/Mmp16/Gli2/Gas1/Pcgf2/Tmed2/Smo/Six4/Mmp14/Myo7a
GO:1901978	positive regulation of cell cycle checkpoint	16	0.731479	1.83504	0.00315831	0.00315831	0.0179213	1104	tags=44%, list=8%, signal=40%	Knl1/Birc5/Incenp/Cdca8/Aurkb/Ndc80/Gen1
GO:0170034	L-amino acid biosynthetic process	36	0.584551	1.76598	0.00319906	0.00319906	0.0181289	2043	tags=36%, list=15%, signal=31%	Phgdh/Plod2/Ass1/Pycr1/Aldh18a1/Dhfr/Gls2/Plod3/Psat1/Mri1/Mthfd1/Shmt2/Mtap
GO:0030326	embryonic limb morphogenesis	109	0.4218	1.51294	0.00321525	0.00321525	0.0181703	2167	tags=35%, list=16%, signal=30%	Sfrp2/Prrx2/Aldh1a2/Lmx1b/Twist1/Osr1/Fbn2/Shox2/Crabp2/En1/Pitx1/Wnt5a/Ror2/Alx4/Bmpr1a/Prrx1/Wnt9a/Hoxc10/Fgfr1/Aff3/Osr2/Gli3/Rab23/Tmem107/Lnpk/Tgfb2/Runx2/Gli2/Gas1/Hoxa10/Tmem231/Rspo2/B9d1/Dync2h1/Wdpcp/Gpc3/Hoxa9/Tbx5
GO:0035113	embryonic appendage morphogenesis	109	0.4218	1.51294	0.00321525	0.00321525	0.0181703	2167	tags=35%, list=16%, signal=30%	Sfrp2/Prrx2/Aldh1a2/Lmx1b/Twist1/Osr1/Fbn2/Shox2/Crabp2/En1/Pitx1/Wnt5a/Ror2/Alx4/Bmpr1a/Prrx1/Wnt9a/Hoxc10/Fgfr1/Aff3/Osr2/Gli3/Rab23/Tmem107/Lnpk/Tgfb2/Runx2/Gli2/Gas1/Hoxa10/Tmem231/Rspo2/B9d1/Dync2h1/Wdpcp/Gpc3/Hoxa9/Tbx5
GO:0019511	peptidyl-proline hydroxylation	12	0.771963	1.8047	0.00321887	0.00321887	0.0181703	1505	tags=58%, list=11%, signal=52%	P4ha3/P4ha2/P4ha1/P4hb/Egln3/Crtap/Prdx4
GO:0043029	T cell homeostasis	45	-0.545199	-1.68195	0.00327385	0.00327385	0.0184568	2381	tags=40%, list=17%, signal=33%	Il2ra/Stat5b/Rc3h1/Tcirg1/Coro1a/Cd24a/Nckap1l/Tgfb1/Il20rb/Jak3/P2rx7/Tsc22d3/Ahr/Il7r/Lmo1/Spns2/Aim2/Gimap5
GO:0097435	supramolecular fiber organization	657	0.293966	1.26732	0.00328269	0.00328269	0.0184827	1753	tags=19%, list=13%, signal=17%	Aqp2/Ltbp2/Slit2/Lox/Mfap5/Sfrp2/Fhdc1/Comp/Col11a1/Mfap4/Lmx1b/Csrp2/Loxl3/Efemp2/Scx/P3h1/Col5a1/Loxl1/Tnfaip6/Zfp469/Aebp1/Col27a1/Loxl2/Map1a/Cyp1b1/Col1a1/Col5a2/Col6a1/Tgfb3/Wnt11/Fat1/Adamts2/Tpm2/Col1a2/Dpt/Rhou/Lpar1/Stmn4/Pak3/Col14a1/Col3a1/Tubg2/Emilin1/Ccn2/Pdxp/P3h4/Bfsp1/Fkbp10/P4ha1/Adamts14/Cnn1/Acan/Rnd3/Flnc/Dbn1/Itgb5/Rhoq/Pak1/Cdc42ep5/Chadl/Tacc3/Tpm1/Diaph3/Rac3/Samd14/Crya…
GO:0042492	gamma-delta T cell differentiation	12	-0.762923	-1.75974	0.00328795	0.00328795	0.0184884	2343	tags=67%, list=17%, signal=55%	Lck/Stat5b/Nckap1l/Ptprc/Syk/Jag2/Sox13/Gimap5
GO:0001936	regulation of endothelial cell proliferation	120	-0.425504	-1.53813	0.00331244	0.00331244	0.0186021	1890	tags=39%, list=14%, signal=34%	Plcg1/Tnf/Lrg1/Hspg2/Sp1/Nras/Nr2f2/Bmp4/Rgcc/Il10/Cxcl12/Apln/Fgfr3/Atoh8/Gata2/Jcad/Stat1/Flt4/Gja1/Col18a1/Ptprm/Eng/Bmp6/Dysf/Prkd2/Vegfc/Vash1/Pparg/Mef2c/Flt1/Tek/Cav2/Igf2/Itga4/Apoe/Egfl7/Pdgfb/Tie1/Ppp1r16b/Cav1/Cdh13/Mmrn2/Kdr/Dll4/Xdh/Aplnr/Nrarp
GO:0034340	response to type I interferon	62	-0.501007	-1.66525	0.00331962	0.00331962	0.0186185	3144	tags=40%, list=23%, signal=31%	Ifnar1/Hdac4/Dcst1/Usp27x/Ifnar2/Mavs/Mmp12/Tyk2/Tbk1/Samhd1/Ifitm1/Adar/Ifitm3/Ifih1/Stat1/Trim56/Stat2/Oas2/Oas1a/Sp100/Isg15/Trim6/Irf7/Nlrc5/Ch25h
GO:0007098	centrosome cycle	125	0.421893	1.54296	0.0033486	0.0033486	0.018733	3390	tags=40%, list=25%, signal=30%	Brca1/Stil/Pclaf/Plk4/Nek2/Kif11/Sgo1/Haus6/Plk1/Kifc1/Ndc80/Gen1/Cep295nl/Atf5/BC034090/Alms1/Pde4dip/Brca2/Tuba1a/Slc16a1/Mcph1/Brsk1/Npm1/Nubp1/Cdk5rap2/Sass6/Ranbp1/Sac3d1/Xrcc2/Haus8/Haus1/Haus4/Chek1/Cetn4/Pard6g/Haus7/Poc1a/Wdr62/Cep85/Cep76/Pard6a/Map9/Haus3/Rttn/Nup62/Haus5/Ssx2ip/Cntln/Cep131/Aurka
GO:0098792	xenophagy	16	-0.723245	-1.7767	0.00334864	0.00334864	0.018733	2239	tags=88%, list=16%, signal=73%	Ripk2/Atg16l1/Optn/Lgals8/Rnf31/Tbk1/Nod1/Tlr2/Mapk3/Irgm2/Rnf213/Nod2/Igtp/Irgm1
GO:0032609	type II interferon production	91	-0.46859	-1.63242	0.00335845	0.00335845	0.0187638	2219	tags=42%, list=16%, signal=35%	Zc3h12a/Lilrb4a/Tyk2/Jak2/Runx3/Sash3/Tcirg1/Tlr7/Tlr4/Tnf/Nras/Cd27/Lgals9/Pde4b/Il10/Il20rb/Zfpm1/H2-K1/Cd14/Il27ra/H2-D1/Nod2/Irf8/Pglyrp1/Isg15/Laptm5/Il1b/Vsir/H2-Q4/Tlr3/H2-Q7/Ccr2/Irgm1/Slc11a1/Gimap5/H2-Q6/Cd274/Ccr7
GO:0060828	regulation of canonical Wnt signaling pathway	206	0.356499	1.37584	0.00337206	0.00337206	0.0188157	1175	tags=17%, list=9%, signal=16%	Sfrp1/Sfrp2/Cthrc1/Cdh3/Nkd2/Rspo3/Wnt5b/Tnn/Col1a1/Mdk/Wnt5a/Wnt11/Tpbg/Ror2/Aspm/Rbms3/Dact1/Bicc1/Fzd1/Egfr/Nphp4/Fgf2/Sulf2/Tbx18/Dact3/Ptk7/Gli3/Nkd1/Ift20/Sema5a/Cdk14/Dkk3/Sox9/Wls/Dkk2
GO:0001937	negative regulation of endothelial cell proliferation	36	-0.592912	-1.7365	0.0033856	0.0033856	0.0188671	1496	tags=56%, list=11%, signal=50%	Krit1/Apc/Tnf/Nr2f2/Rgcc/Atoh8/Stat1/Gja1/Ptprm/Eng/Vash1/Pparg/Mef2c/Flt1/Cav2/Apoe/Cav1/Mmrn2/Dll4/Xdh
GO:0048592	eye morphogenesis	123	0.42212	1.53658	0.00339337	0.00339337	0.0188863	1044	tags=23%, list=8%, signal=21%	Dio3/Rbp4/Col8a2/Col8a1/Mfap5/Aldh1a3/Twist1/Ephb2/Col5a1/Tulp1/Thy1/Mfap2/Col5a2/Fat1/Tenm3/Ptn/Fjx1/Megf11/Fgf2/Ahi1/Fzd5/Tsku/Gli3/Aldh1a1/Vegfa/Sox9/Nectin1/Vax2
GO:0061760	antifungal innate immune response	15	-0.72383	-1.75216	0.00342361	0.00342361	0.0190149	1801	tags=53%, list=13%, signal=46%	Clec4n/Clec4a2/Plcg2/Clec4a3/Spi1/Cx3cr1/Clec4a1/Clec4b1
GO:0048729	tissue morphogenesis	502	0.315798	1.34037	0.00342522	0.00342522	0.0190149	1837	tags=22%, list=13%, signal=20%	Vdr/Slit2/Sfrp1/Fst/Nrg1/Sfrp2/Cthrc1/Aldh1a3/Aldh1a2/Lif/Col11a1/Artn/Twist1/Osr1/Tnc/Adamts16/Fgf7/Efemp2/Scx/Rspo3/Fzd2/Kif26b/Col5a1/Shox2/Sema3c/Stil/Enpp1/Mdk/Runx1/Wnt5a/Wnt11/Fat1/Inhba/Zfpm2/Col3a1/Mgp/Car9/Bmpr1a/Pdpn/Angpt1/Fzd1/Fgfr1/Egfr/Igf1/Irx3/Fgf2/Mmp2/Sulf1/Ahi1/Robo1/Tbx18/Fzd5/Pak1/Tpm1/Ptk7/Six2/Gli3/Fzd3/Csf1/Pard3/Maged1/Nkd1/Arhgap24/Kif20b/Nfatc4/Aldh1a1/Ift20/Hs3st3a1/S…
GO:0030888	regulation of B cell proliferation	53	-0.526097	-1.67093	0.00344605	0.00344605	0.0191063	2828	tags=57%, list=21%, signal=45%	Card11/Tirap/Bcl2/Cd81/Cdkn1a/Rc3h1/Gpr183/Sash3/Pawr/Tlr4/Cd24a/Nckap1l/Slc39a10/Ptprc/Il10/Tnfrsf13b/Cd40/Pkn1/Cd74/Ahr/Tyrobp/Lyn/Inpp5d/Bst1/Cd300a/Fcgr2b/Mef2c/Tnfrsf21/Cd38/Ighm
GO:0032232	negative regulation of actin filament bundle assembly	34	-0.581205	-1.68886	0.00345498	0.00345498	0.0191314	1719	tags=29%, list=12%, signal=26%	Wasf2/Inpp5k/Rhpn2/Tjp1/S1pr1/Map3k1/Kank3/Shank3/F11r/Was
GO:0034367	protein-containing complex remodeling	17	-0.716474	-1.80107	0.00346377	0.00346377	0.0191558	1266	tags=47%, list=9%, signal=43%	Lpl/Taf8/Pla2g7/Apoe/Abcg1/Gpihbp1/Pltp/Scarb1
GO:0070972	protein localization to endoplasmic reticulum	69	0.489722	1.65083	0.0034692	0.0034692	0.0191615	2384	tags=36%, list=17%, signal=30%	Tram1l1/Kdelr3/Sec16b/Arxes1/Ank2/Sec61b/Arxes2/Hspa5/Kdelr2/Sec61g/Ubl4a/Srprb/Sec61a1/Mia3/Rer1/Spcs1/Ssr3/Kdelr1/Spcs2/Srp9/Gbf1/Vapa/Srp19/Tram1/Srp72
GO:0050855	regulation of B cell receptor signaling pathway	13	-0.748926	-1.76409	0.00347503	0.00347503	0.0191694	1824	tags=62%, list=13%, signal=53%	Lpxn/Slc39a10/Nfam1/Stap1/Lyn/Cd300a/Prkcb/Prkch
GO:0035723	interleukin-15-mediated signaling pathway	10	-0.799245	-1.75526	0.00352066	0.00352066	0.0193721	1141	tags=40%, list=8%, signal=37%	Jak3/Il15/Plcb1/Il2rg
GO:0071350	cellular response to interleukin-15	10	-0.799245	-1.75526	0.00352066	0.00352066	0.0193721	1141	tags=40%, list=8%, signal=37%	Jak3/Il15/Plcb1/Il2rg
GO:0046856	phosphatidylinositol dephosphorylation	27	-0.61903	-1.73338	0.00352737	0.00352737	0.0193809	2922	tags=56%, list=21%, signal=44%	Inpp5b/Sacm1l/Mtmr2/Mtmr1/Synj1/Inpp5a/Mtmr3/Inpp5f/Mtmr12/Inpp5k/Mtmr10/Mtmr11/Mtm1/Inpp5d/Inpp4b
GO:0006820	monoatomic anion transport	75	-0.472907	-1.60242	0.00353116	0.00353116	0.0193809	2340	tags=37%, list=17%, signal=31%	Ostm1/Gopc/Clic4/Rab11b/Slc4a8/Abcc3/Lrrc8b/Pacc1/Lrrc8d/Slc12a2/Lrrc8a/P2ry6/Clcn3/Slc12a6/Slc12a9/Stc1/Slc12a7/Abcb1b/Lrrc8c/Clca2/Clic5/Kcnq1/Slc12a5/Car7/Car2/Slc1a1/Ano1/Abcb1a
GO:0032732	positive regulation of interleukin-1 production	67	-0.490713	-1.64317	0.00353804	0.00353804	0.0193942	2369	tags=46%, list=17%, signal=38%	Casp1/Casp4/Tmem106a/Jak2/Casp8/Nlrp10/Tlr4/Tnf/Lgals9/Il16/Nlrp3/Ccl3/Ifi206/Nod1/Ifi207/Hspb1/Lpl/Mndal/Tlr2/Ccr5/P2rx7/Ifi209/Nod2/Tyrobp/Ifi203/Cd36/Aim2/Gbp5/Ifi213/Ifi208/Ccr7
GO:0007548	sex differentiation	189	0.371435	1.41733	0.00356096	0.00356096	0.0194953	1564	tags=22%, list=11%, signal=20%	Rbp4/Sfrp1/Fst/Sfrp2/Ptx3/Osr1/Fgf7/Serpine1/Bmpr1b/Tnfaip6/Pla2g4a/Tyro3/Nupr1/Runx1/Wnt5a/Ror2/Inhba/Zfpm2/Rhobtb3/Aspm/Bmpr1a/Angpt1/Brip1/Mmp2/Rnase10/Ptprn/Fancf/Cntfr/Vegfa/Sox9/Pdgfra/Itgav/Gas2/Fanca/Axl/Tgfb2/Dhcr24/Nup107/Brca2/Prdx4/Bmp5/Src
GO:0098543	detection of other organism	17	-0.713623	-1.7939	0.00356927	0.00356927	0.0195163	1786	tags=65%, list=13%, signal=56%	Tlr1/Nod1/Tlr2/H2-K1/H2-D1/Nod2/Naip2/Pglyrp1/H2-Q4/H2-Q7/H2-Q6
GO:0044060	regulation of endocrine process	33	0.591144	1.75364	0.0035913	0.0035913	0.0196122	993	tags=30%, list=7%, signal=28%	Vdr/Ecrg4/Nrg1/Lif/Runx1/Inhba/F2r/Fgfr1/Spp1/F2rl1
GO:0046637	regulation of alpha-beta T cell differentiation	60	-0.500289	-1.65079	0.00359672	0.00359672	0.0196172	2360	tags=40%, list=17%, signal=33%	Gata3/Zc3h12a/Rc3h1/Lilrb4a/Runx3/Sash3/Nckap1l/Nlrp3/Tgfb1/Irf1/Jak3/Pf4/Sh3rf1/Cd83/Nfkbid/Syk/Itpkb/Hlx/Il2rg/Ccr2/Prdm1/Gimap5/Zbtb16/Ccr7
GO:0045579	positive regulation of B cell differentiation	18	-0.687833	-1.75024	0.00360554	0.00360554	0.0196407	2233	tags=50%, list=16%, signal=42%	Stat5b/Nckap1l/Cd27/Il10/Syk/Atp11c/Spi1/Inpp5d/Il2rg
GO:0042219	cellular modified amino acid catabolic process	20	0.67627	1.78201	0.00362712	0.00362712	0.0197336	1914	tags=40%, list=14%, signal=34%	Dio3/Ggt7/Dpep1/Aldh1l2/Sardh/Ggt5/Ahcy/Ggact
GO:0001933	negative regulation of protein phosphorylation	266	-0.350569	-1.39606	0.00363633	0.00363633	0.019759	2695	tags=33%, list=20%, signal=27%	Zbed3/Ctdsp2/Pkia/Camk2n1/Lats2/Met/Dgkq/Ogt/Cdkn1a/Terf2ip/Gadd45a/Myadm/Prkag2/Kat2b/Wwtr1/Zc3h12a/Lilrb4a/Apc/Dusp1/Deptor/Nck2/Plec/Cdkn1c/Gpd1l/Grk2/Sema4d/Ptpro/Inpp5f/Cbl/Pkib/Spred2/Insr/Bmp2/Cd109/Dusp7/Socs3/Nck1/Tgfb1/Ptprc/Gnaq/Ctdsp1/Pid1/Nr2f2/Heg1/Inpp5k/Rgs2/Adar/Dab2ip/Adarb1/Hspb1/Dmd/Irf1/Cnksr3/Hyal2/Fbxo7/Rassf2/Pkn1/Dusp22/Dusp3/Dbndd2/Rb1/Ppm1f/Prr5l/Plpp3/Ptpn6/Arrb1/Igfbp…
GO:0001935	endothelial cell proliferation	139	-0.408607	-1.5148	0.00366688	0.00366688	0.0198774	1890	tags=39%, list=14%, signal=34%	Plcg1/Tnf/Lrg1/Hspg2/Sp1/Nras/Nr2f2/Lipa/Bmp4/Rgcc/Il10/Cxcl12/Apln/Fgfr3/Atoh8/Gata2/Jcad/Stat1/Prkx/Flt4/Gja1/Col18a1/Ptprm/Eng/Bmp6/Dysf/Prkd2/Pik3cb/Epha2/Vegfc/Vash1/Pparg/Cd34/Mef2c/Flt1/Tek/Cav2/Igf2/Itga4/Apoe/Egfl7/Pdgfb/Tie1/Ppp1r16b/Cav1/Enpep/Cdh13/Mmrn2/Scarb1/Kdr/Dll4/Xdh/Aplnr/Nrarp
GO:0031023	microtubule organizing center organization	134	0.410165	1.51179	0.00366725	0.00366725	0.0198774	3390	tags=38%, list=25%, signal=29%	Brca1/Stil/Pclaf/Plk4/Nek2/Kif11/Sgo1/Haus6/Plk1/Kifc1/Ndc80/Gen1/Cep295nl/Atf5/BC034090/Alms1/Pde4dip/Brca2/Tuba1a/Slc16a1/Mcph1/Brsk1/Npm1/Nubp1/Cdk5rap2/Sass6/Ranbp1/Sac3d1/Xrcc2/Haus8/Haus1/Haus4/Chek1/Cetn4/Pard6g/Rbm14/Haus7/Poc1a/Wdr62/Cep85/Cep76/Pard6a/Map9/Haus3/Rttn/Nup62/Haus5/Ssx2ip/Cntln/Cep131/Aurka
GO:0099150	regulation of postsynaptic specialization assembly	15	0.713881	1.74826	0.00368154	0.00368154	0.0199062	771	tags=33%, list=6%, signal=31%	Abi3bp/Wnt5a/Ptprs/Lrfn1/Lrfn4
GO:0001774	microglial cell activation	40	-0.573562	-1.72523	0.00368168	0.00368168	0.0199062	1887	tags=48%, list=14%, signal=41%	Tlr4/Nampt/Tnf/Tlr1/Stap1/Ifngr1/Tlr2/C5ar1/Tafa3/Clu/Csf1r/Aif1/Tyrobp/Pparg/C1qa/Cx3cr1/Tlr3/Trem2/Kcnj8
GO:0032621	interleukin-18 production	10	-0.798125	-1.7528	0.00369651	0.00369651	0.0199616	2731	tags=80%, list=20%, signal=64%	Gsdmd/Casp1/Tnf/Nlrp3/Tlr2/Nod2/Cd84/Gbp5
GO:1901186	positive regulation of ERBB signaling pathway	22	-0.643285	-1.69882	0.00371062	0.00371062	0.0199882	2933	tags=55%, list=21%, signal=43%	Esr1/Plaur/Hap1/Shkbp1/Adam17/Ralb/Dgkd/Tgfb1/Hip1/Hip1r/Afap1l2/Neu3
GO:1903306	negative regulation of regulated secretory pathway	22	-0.643282	-1.69881	0.00371062	0.00371062	0.0199882	2586	tags=50%, list=19%, signal=41%	Rap1a/Abr/Bcr/Nckap1l/Gnai2/Lgals9/Notch1/Spi1/Cd300a/Cd84/Ccr2
GO:0046068	cGMP metabolic process	11	-0.770093	-1.74213	0.00371771	0.00371771	0.0200017	305	tags=55%, list=2%, signal=53%	Pde9a/Npr2/Pde2a/Gucy1b1/Npr1/Gucy1a1
GO:1905820	positive regulation of chromosome separation	26	0.630361	1.77557	0.00373564	0.00373564	0.0200734	2002	tags=50%, list=15%, signal=43%	Ube2c/Birc5/Ncapg2/Ncapg/Incenp/Cdca8/Aurkb/Smc2/Cenpe/Cdc16/Ncaph/Smc4/Ncapd3
GO:1901379	regulation of potassium ion transmembrane transport	50	-0.519885	-1.65435	0.00377984	0.00377984	0.0202859	1037	tags=22%, list=8%, signal=20%	Klhl24/Kcnj2/Agrn/Kcnq1/Cav1/Atp1b2/Trem2/Lrrc55/Edn3/Abcc9/Casq2
GO:0045646	regulation of erythrocyte differentiation	46	-0.54537	-1.69605	0.00380307	0.00380307	0.0203854	1839	tags=35%, list=13%, signal=30%	Fam210b/Nckap1l/Cdk6/Klf13/Gata2/Stat1/Zfpm1/Hoxa5/Ets1/B2m/Lmo2/Spi1/Lyn/Inpp5d/Isg15/Tal1
GO:0044703	multi-organism reproductive process	114	0.423215	1.52199	0.00381043	0.00381043	0.0203998	1123	tags=17%, list=8%, signal=15%	Vdr/Timp1/A2m/Lif/Hsd11b2/Fbn2/Ptgis/Pla2g4a/Avpr1a/Pcsk5/Il11ra1/Ptgs2/Ptn/Maged2/Mmp2/Hpgd/Vegfa/Serpine2/Vmp1
GO:0042269	regulation of natural killer cell mediated cytotoxicity	36	-0.589332	-1.72602	0.00382998	0.00382998	0.0204793	1663	tags=44%, list=12%, signal=39%	Tap2/Lgals9/Tgfb1/Tap1/Nectin2/H2-K1/H2-D1/Clec2d/Ceacam1/H2-Q4/Igf2/H2-Q7/Gimap5/H2-Q6/Pik3r6/H2-T23
GO:0007178	transmembrane receptor protein serine/threonine kinase signaling pathway	283	0.346752	1.39902	0.00387415	0.00387415	0.0206751	921	tags=15%, list=7%, signal=14%	Grem2/Sfrp1/Fst/Lox/Sfrp2/Comp/Ccl2/Cdh3/Cilp/Fbn2/Scx/Bmpr1b/Thbs1/Cdkn2b/Bmper/Fbn1/Ccn3/Tnfaip6/Vasn/Adamtsl2/Wnt5a/Tgfb3/Col1a2/Ror2/Inhba/Aspn/Col3a1/Emilin1/Fstl1/Ltbp3/Bmpr1a/Neo1/Lrp1/Fzd1/Lefty1/Pmepa1/Itgb5/Sulf1/Magi2/Hpgd/Hspa5/Tmem53
GO:0035307	positive regulation of protein dephosphorylation	39	-0.56939	-1.69754	0.00388097	0.00388097	0.0206751	2028	tags=36%, list=15%, signal=31%	Nck2/Gna12/Slc39a10/Nck1/Tgfb1/Ptprc/Pink1/Ppp2r5a/Itga1/Pirb/Cd300a/Ppp1r16b/Agtr2/Cdh5
GO:0002396	MHC protein complex assembly	18	-0.686387	-1.74656	0.00388557	0.00388557	0.0206751	2230	tags=72%, list=16%, signal=61%	Tapbp/H2-Ob/Tapbpl/H2-Eb1/H2-DMa/H2-K1/H2-Aa/B2m/H2-D1/H2-Ab1/H2-Q4/H2-Q7/H2-Q6
GO:0002501	peptide antigen assembly with MHC protein complex	18	-0.686387	-1.74656	0.00388557	0.00388557	0.0206751	2230	tags=72%, list=16%, signal=61%	Tapbp/H2-Ob/Tapbpl/H2-Eb1/H2-DMa/H2-K1/H2-Aa/B2m/H2-D1/H2-Ab1/H2-Q4/H2-Q7/H2-Q6
GO:0030111	regulation of Wnt signaling pathway	256	0.35114	1.39703	0.00393457	0.00393457	0.0209103	984	tags=16%, list=7%, signal=15%	Sfrp1/Sfrp2/Cthrc1/Cdh3/Ccn4/Nkd2/Cmah/Rspo3/Wnt5b/Tnn/Col1a1/Mdk/Wnt5a/Wnt11/Tpbg/Ror2/Aspm/Rbms3/Tiam1/Lrp1/Dact1/Bicc1/Fzd1/Egfr/Nphp4/Fgf2/Sulf2/Sulf1/Tbx18/Dact3/Tsku/Ptk7/Gli3/Nkd1/Nfatc4/Ift20/Sema5a/Cdk14/Dkk3/Sox9
GO:0016311	dephosphorylation	270	-0.343411	-1.37391	0.00394394	0.00394394	0.0209346	2631	tags=29%, list=19%, signal=24%	Ppp6r2/Ppp1cb/Npnt/Mtmr2/Mtmr1/Synj1/Cttnbp2nl/Ppp6r1/Inpp5a/Mtmr3/Swap70/Ptpn14/Dusp1/Nck2/Dusp26/Ppm1j/Nceh1/Mgat5/Ptpn12/Ppp6r3/Gna12/Ptpro/Tnf/Inpp5f/Nckap1l/Cdc14a/Bmp2/Slc39a10/Dusp7/Nck1/Ppm1k/Mtmr12/Tgfb1/Ptprc/Ptpre/Ctdsp1/Pink1/Inpp5k/Plpp6/Ppm1l/Ptpn4/Mtmr14/Mtmr10/Mtmr11/Ssh2/Ppm1h/Tns2/Ppp1r2/Ikbkb/Eya1/Dusp2/Dusp22/Plek/Ppp2r5a/Dusp3/Ptprm/Itga1/Mtm1/Ppm1f/Plpp3/Ptprk/Ptpn6/Pirb/Inp…
GO:0002371	dendritic cell cytokine production	16	-0.716655	-1.76051	0.00396549	0.00396549	0.020986	1887	tags=56%, list=14%, signal=49%	Tlr4/Plcg2/Tlr2/Bst2/Jak3/Nod2/Tlr3/Kit/Slamf9
GO:0002888	positive regulation of myeloid leukocyte mediated immunity	29	-0.62576	-1.7734	0.00396808	0.00396808	0.020986	978	tags=48%, list=7%, signal=45%	Stap1/H2-K1/Itgb2/H2-D1/Ptafr/Fcgr3/Spi1/Fcer1g/Tyrobp/H2-Q4/H2-Q7/Fcgr1/H2-Q6/H2-T23
GO:0014887	cardiac muscle adaptation	24	-0.646927	-1.75248	0.00396808	0.00396808	0.020986	1821	tags=46%, list=13%, signal=40%	Inpp5f/Bmp2/Bmp4/Smad1/Camta2/Foxo1/Acacb/Atp2b4/Pparg/Mef2c/Trpc3
GO:0045639	positive regulation of myeloid cell differentiation	92	-0.450238	-1.56939	0.00403033	0.00403033	0.0212894	1839	tags=29%, list=13%, signal=26%	Fam210b/Tnf/Nckap1l/Klf10/Ccl3/Tgfb1/Ctnnbip1/Csf3/Gata2/Stat1/Hoxa5/Ccl9/Csf1r/Rb1/Ets1/Cd74/Tnfrsf11a/Tyrobp/Inpp5d/Isg15/Ikzf1/Kitl/Tal1/Hcls1/Trem2/Car2/Tesc
GO:0031400	negative regulation of protein modification process	372	-0.326465	-1.34664	0.00404496	0.00404496	0.0213408	2749	tags=30%, list=20%, signal=25%	Bak1/Sirt7/Zbed3/Ctdsp2/Pkia/Camk2n1/Lats2/Met/Dgkq/Ogt/Hmg20a/Cdkn1a/Terf2ip/Gadd45a/Myadm/Swap70/Spopl/Prkag2/Kat2b/Wwtr1/Zc3h12a/Lilrb4a/Oxr1/Apc/Dusp1/Deptor/Nck2/Plec/Cdkn1c/Mgat5/Gpd1l/Fyn/Grk2/Sema4d/Ptpro/Tnf/Inpp5f/Cbl/Pkib/Wnk1/Spred2/Insr/Nckap1l/Bmp2/Cd109/Dusp7/Socs3/Nck1/Ncoa7/Tgfb1/Ptprc/Gnaq/Ctdsp1/Pid1/Nr2f2/Heg1/Inpp5k/Ctnnb1/N4bp1/Rgs2/Adar/Dab2ip/Adarb1/Hspb1/Dmd/Irf1/Cnksr3/H…
GO:0032675	regulation of interleukin-6 production	137	-0.402976	-1.48943	0.00405308	0.00405308	0.0213578	2219	tags=36%, list=16%, signal=30%	Zc3h12a/Tmem106a/Lilrb4a/Nlrp10/Trpv4/Tlr7/Grk2/Tlr4/Arhgef2/Il6ra/Tnf/Tlr1/Cd24a/Nckap1l/Lgals9/Il16/Tgfb1/Pou2f2/Plcg2/Nod1/Unc93b1/Il10/Lpl/Ifih1/Hyal2/Tlr2/Ccr5/P2rx7/Il27ra/Syk/Cd74/Ptafr/Aif1/Fcer1g/Nod2/Ptpn6/Tyrobp/Arrb1/Inpp5d/Laptm5/Il1b/Afap1l2/Cd84/Trim30a/Tlr3/Nos2/Cd36/Cd200/Trem2
GO:0044839	cell cycle G2/M phase transition	138	0.402869	1.48424	0.00406219	0.00406219	0.021359	2485	tags=33%, list=18%, signal=28%	Clspn/Brca1/Kif14/Orc1/Dtl/Ticrr/Birc5/Blm/Creb3l1/Cdk1/Hacd1/Pkmyt1/Ccna2/Rrm1/Atad5/Cdc25c/Cdk14/Aurkb/Plk1/Mastl/Donson/Ndc80/Cdkn2a/Atf5/Bard1/Cdk5rap3/Skp2/Brsk1/Ier3/Fbxo5/Npm1/Cdc6/Foxm1/Lmnb1/Cdc7/Rint1/Atm/Chek1/Cdk4/Topbp1/Cenpf/Rbbp8/Cdk10/Rad50/Calm2/Rnaseh2b
GO:0006623	protein targeting to vacuole	45	-0.539365	-1.66396	0.00406311	0.00406311	0.021359	3657	tags=42%, list=27%, signal=31%	Mon1a/Rab7/Vps13c/Pik3c3/Sort1/Atg14/Vps13a/Ncoa4/Vps37b/Becn1/Vps54/Vps13d/Gga3/Sorl1/Irgm2/Clu/Igtp/Laptm5/Irgm1
GO:0030500	regulation of bone mineralization	65	0.485908	1.61745	0.00410251	0.00410251	0.0215142	1291	tags=31%, list=9%, signal=28%	Vdr/Comp/Twist1/Osr1/Fbn2/Bmpr1b/Tmem119/Enpp1/Pkdcc/Tent5a/Ptn/Mgp/Ltbp3/Bmpr1a/Slc8a1/Osr2/Sgms2/Sox9/Gpm6b/Mia3
GO:0010389	regulation of G2/M transition of mitotic cell cycle	98	0.431555	1.52383	0.00410251	0.00410251	0.0215142	2485	tags=34%, list=18%, signal=28%	Clspn/Brca1/Kif14/Orc1/Dtl/Ticrr/Blm/Creb3l1/Cdk1/Hacd1/Pkmyt1/Rrm1/Cdc25c/Plk1/Donson/Cdkn2a/Bard1/Cdk5rap3/Brsk1/Ier3/Fbxo5/Cdc6/Lmnb1/Cdc7/Rint1/Atm/Chek1/Cdk4/Topbp1/Cenpf/Rbbp8/Rad50/Rnaseh2b
GO:0072109	glomerular mesangium development	11	-0.766663	-1.73437	0.00414258	0.00414258	0.0216858	2197	tags=73%, list=16%, signal=61%	Cflar/Il6ra/Bmp4/Pdgfd/Notch1/C3ar1/Pdgfb/Gpr4
GO:0007565	female pregnancy	102	0.430895	1.52667	0.00414518	0.00414518	0.0216858	1123	tags=17%, list=8%, signal=15%	Vdr/Timp1/A2m/Lif/Hsd11b2/Fbn2/Ptgis/Pla2g4a/Pcsk5/Il11ra1/Ptgs2/Ptn/Maged2/Mmp2/Hpgd/Vegfa/Vmp1
GO:0141087	positive regulation of inflammasome-mediated signaling pathway	21	-0.663656	-1.75563	0.00417349	0.00417349	0.0218077	2909	tags=52%, list=21%, signal=41%	Ptpn22/Mavs/Ddx3x/Casp4/Mark4/Tlr4/Atat1/Plcg2/Gbp2/Cd36/Gbp5
GO:2000107	negative regulation of leukocyte apoptotic process	52	-0.513259	-1.6345	0.00420535	0.00420535	0.0219216	1660	tags=38%, list=12%, signal=34%	Slc39a10/Cd27/Bmp4/Cxcl12/St6gal1/Mertk/Jak3/Bcl2l1/Ccr5/Tsc22d3/Cd74/Itpkb/Fcer1g/Il7r/Nod2/Fcgr2b/Kitl/Hcls1/Efna1/Ccr7
GO:0071805	potassium ion transmembrane transport	102	-0.431733	-1.53338	0.00420535	0.00420535	0.0219216	1037	tags=18%, list=8%, signal=16%	Klhl24/Slc12a6/Kcnj2/Slc12a7/Agrn/Kcnb1/Kcnq1/Slc12a5/Cav1/Atp1b2/Trem2/Lrrc55/Kcna5/Edn3/Atp1a2/Abcc9/Casq2/Kcnj8
GO:0042326	negative regulation of phosphorylation	286	-0.340678	-1.3654	0.00423583	0.00423583	0.0220541	2695	tags=32%, list=20%, signal=26%	Zbed3/Ctdsp2/Pkia/Camk2n1/Lats2/Met/Dgkq/Ogt/Cdkn1a/Terf2ip/Gadd45a/Myadm/Prkag2/Kat2b/Wwtr1/Zc3h12a/Lilrb4a/Apc/Dusp1/Deptor/Nck2/Plec/Tigar/Cdkn1c/Gpd1l/Grk2/Sema4d/Ptpro/Inpp5f/Cbl/Pkib/Spred2/Insr/Bmp2/Cd109/Dusp7/Socs3/Nck1/Tgfb1/Ptprc/Gnaq/Ctdsp1/Pid1/Nr2f2/Stap1/Heg1/Inpp5k/Midn/Rgs2/Adar/Dab2ip/Adarb1/Hspb1/Dmd/Irf1/Cnksr3/Hyal2/Fbxo7/Rassf2/Pkn1/Dusp22/Ppp2r5a/Dusp3/Dbndd2/Rb1/Ppm1f/Prr5…
GO:0051988	regulation of attachment of spindle microtubules to kinetochore	20	0.66976	1.76485	0.00424933	0.00424933	0.022098	1508	tags=45%, list=11%, signal=40%	Nek2/Birc5/Incenp/Spag5/Ect2/Cdca8/Aurkb/Cenpe/Racgap1
GO:0008406	gonad development	158	0.384851	1.44241	0.00429342	0.00429342	0.0223007	1367	tags=21%, list=10%, signal=19%	Rbp4/Sfrp1/Fst/Sfrp2/Ptx3/Osr1/Fgf7/Serpine1/Bmpr1b/Tnfaip6/Pla2g4a/Nupr1/Runx1/Wnt5a/Inhba/Zfpm2/Rhobtb3/Aspm/Angpt1/Brip1/Mmp2/Rnase10/Ptprn/Fancf/Vegfa/Sox9/Pdgfra/Itgav/Gas2/Fanca/Tgfb2/Nup107/Brca2
GO:0009725	response to hormone	557	-0.297043	-1.26557	0.00432449	0.00432449	0.0224353	2281	tags=23%, list=17%, signal=20%	Calcoco1/Kat2b/Dab2/Pld2/Stat5b/Cyfip1/Adipor1/Lancl2/Sos1/Tyk2/Jak2/Tgfbr3/Lnpep/Akr1c19/Fosl2/Apc/Ep300/Akt3/Adipor2/Ncoa2/Kdm4c/Bbs4/Nr3c1/Trim24/Acr/Trarg1/Rxra/Trpv4/Kbtbd2/Vps54/Casp9/Il1rn/Npr2/Grk2/Tnf/Htr7/Sp1/Cd24a/Wbp2/Insr/Kank1/Srarp/Sos2/Gnai2/Socs3/Nck1/Tgfb1/Zmiz1/Tbc1d4/Ptpre/Pid1/Arsa/Bmp4/Inpp5k/Eif4ebp2/Ctnnb1/Sorl1/Cd2ap/Il10/P2ry6/Sorbs1/Lpl/Timp3/Irf1/Crebrf/Kmt2d/Tns2/Stat…
GO:2000027	regulation of animal organ morphogenesis	78	0.473868	1.62979	0.00433714	0.00433714	0.0224742	1722	tags=33%, list=13%, signal=29%	Sfrp1/Sfrp2/Fgf7/Tnfrsf11b/Fzd2/Wnt5a/Bmpr1a/Fzd1/Fgfr1/Fgf2/Sulf1/Ahi1/Robo1/Ptk7/Six2/Csf1/Maged1/Vegfa/Sox9/Six1/Hgf/Runx2/Apcdd1/Smo/Rspo2/Six4
GO:0060323	head morphogenesis	38	0.559601	1.70311	0.0044036	0.0044036	0.0227915	1242	tags=24%, list=9%, signal=22%	Twist2/Scx/Col1a1/Tgfb3/Mmp2/Pdgfra/Asph/Tgfb2/Crispld2
GO:0045667	regulation of osteoblast differentiation	128	0.408487	1.49603	0.00442814	0.00442814	0.022877	984	tags=18%, list=7%, signal=17%	Twist2/Sfrp1/Sfrp2/Cthrc1/Smoc1/Ccn4/Twist1/Fbn2/Bmpr1b/Tmem119/Scube2/Tnfaip6/Tnn/Tent5a/Bmpr1a/Fzd1/Fgfr1/Igf1/Fgf2/Gli3/Tmem53/Vegfa/Sox9
GO:0045859	regulation of protein kinase activity	432	-0.317968	-1.33001	0.00443061	0.00443061	0.022877	2103	tags=25%, list=15%, signal=22%	Apc/Dusp1/Adam17/Deptor/Plec/Ccny/Cdkn1c/Dipk2a/Ralb/Tlr4/Rapgef2/Il6ra/Ptpro/Tnf/Sfn/Tlr1/Cbl/Cd24a/Pkib/Insr/Bmp2/Dusp7/Sash1/Ptprc/Gnaq/Cd86/Nr2f2/Adrb2/Synpo2/Rgcc/Heg1/Inpp5k/Rgs2/Adar/Cd40/Dab2ip/Adarb1/Hspb1/Map2k6/Gprc5b/Hyal2/Pxn/C5ar1/Fbxo7/Rassf2/Fgd2/Pkn1/Fzd4/Dusp22/P2rx7/Dusp3/Irgm2/Tcim/Ccng2/Syk/Pdgfd/Dbndd2/Csf1r/Rb1/Tnxb/Tnfrsf11a/Ppm1f/Mmd/Agrn/Ptpn6/Aplp2/Igtp/Atp2b4/Trib2/Veg…
GO:0014812	muscle cell migration	123	0.417245	1.51883	0.00445796	0.00445796	0.0229813	2165	tags=34%, list=16%, signal=29%	Slit2/Thbs4/Drd4/Ccn4/Serpine1/Tafa5/F3/Ccn3/Has2/Enpp1/Ndrg4/Cyp1b1/Mdk/Postn/Fat1/Pcsk5/Lpar1/Bmpr1a/Dock7/Anxa1/Lrp1/Igf1/S1pr2/Pak1/Tpm1/Six1/Tert/Plat/Src/Nox4/Smo/Ddr2/Apex1/Six4/Grb10/Rps6kb1/Dock5/S100a11/Myc/Parva/Gstp1/Adipoq
GO:0042886	amide transport	248	-0.350682	-1.38706	0.00446979	0.00446979	0.0229813	2015	tags=25%, list=15%, signal=22%	Tcirg1/Rab11b/Trpv4/Il1rn/Rab11fip5/Rab8b/Tnf/Anxa7/Psap/Tap2/Slc25a22/Tap1/Gnaq/Klf7/Midn/Apln/Abcg2/Lrp5/Foxo1/Ucp2/Slc15a3/Hmga1/Inhbb/Gja1/Orai1/Glul/Hfe/Arhgef7/Pde1c/Cd74/Pim3/Slc8b1/Abcb1b/Rapgef4/Arrb1/Syt7/Chd7/Sybu/Rph3al/Pparg/Acvr2b/Il1b/Plcb1/Lepr/Kcnb1/Aqp7/Prkcb/Abcg1/Abca1/Nos2/Kcnq1/Pde8b/Folr2/Pltp/Car2/Exoc3l/Cpe/Aqp1/Cd38/Edn3/Ano1/Abcb1a/Chga
GO:0061900	glial cell activation	49	-0.525922	-1.65815	0.00447099	0.00447099	0.0229813	1887	tags=43%, list=14%, signal=37%	Tlr4/Nampt/Tnf/Tlr1/Stap1/Ifngr1/Tlr2/C5ar1/Adora2a/Tafa3/Clu/Csf1r/Aif1/Tyrobp/Pparg/Il1b/C1qa/Cx3cr1/Tlr3/Trem2/Kcnj8
GO:0003299	muscle hypertrophy in response to stress	23	-0.651769	-1.73785	0.00447719	0.00447719	0.0229813	1821	tags=48%, list=13%, signal=42%	Inpp5f/Bmp2/Bmp4/Smad1/Camta2/Foxo1/Acacb/Atp2b4/Pparg/Mef2c/Trpc3
GO:0014898	cardiac muscle hypertrophy in response to stress	23	-0.651769	-1.73785	0.00447719	0.00447719	0.0229813	1821	tags=48%, list=13%, signal=42%	Inpp5f/Bmp2/Bmp4/Smad1/Camta2/Foxo1/Acacb/Atp2b4/Pparg/Mef2c/Trpc3
GO:0045216	cell-cell junction organization	147	-0.396714	-1.48201	0.00450833	0.00450833	0.0231139	1571	tags=28%, list=11%, signal=25%	Ctnna1/Hipk1/Tgfb1/Cldn34c1/Micall2/Heg1/Ctnnb1/Cd2ap/Cd9/Actn4/Ikbkb/Adam10/Gja1/Efnb2/Cldn15/Ace/Pkp4/Csf1r/Bmp6/Pkp3/Tjp1/Epha2/Ceacam1/Il1b/Afdn/Cldn5/Jup/Ramp2/Mtss1/Pecam1/Lims2/Prkch/Cav1/Cdh13/Esam/Cdh5/F11r/Gja5/Aplnr/Tmigd1/Hopx
GO:0051090	regulation of DNA-binding transcription factor activity	308	-0.338485	-1.36567	0.00457179	0.00457179	0.0234118	2936	tags=30%, list=21%, signal=24%	Mapk1/Esr1/Eda2r/Trim8/Arrb2/Adgrg3/Card11/Cebpg/Tirap/Bcl3/Edn1/Nfkbil1/Kat6a/Mavs/Lrrfip1/Spop/Sav1/Terf2ip/Rbck1/Crtc2/Irak2/Rnf31/Zc3h12a/Cflar/Tgfbr3/Ep300/Eif2ak2/Id3/Tlr4/Arhgef2/Tnf/Mid2/Bmp2/Zc4h2/Id1/Nlrp3/Slco3a1/Plcg2/Nod1/Hdac5/Nfam1/Rgcc/Pink1/Il10/Trim12a/Cd40/Ctnnbip1/Dab2ip/Ralgapa1/Trim5/Lrp5/Tlr2/Ptch1/Ikbkb/Trim12c/Fzd4/Trim25/Mapk3/Nfkbid/Parp10/Clu/Syk/Trim30d/Trim37/Traf1/T…
GO:0050829	defense response to Gram-negative bacterium	45	-0.535917	-1.65332	0.0046384	0.0046384	0.0236994	936	tags=27%, list=7%, signal=25%	Irgm2/B2m/Mpeg1/Igtp/Lyz2/Irgm1/Slc11a1/Trem2/Aqp1/Iigp1/Ighm/Chga
GO:0023061	signal release	388	-0.319094	-1.32027	0.00463885	0.00463885	0.0236994	1602	tags=21%, list=12%, signal=19%	P2ry12/Cplx2/Slc25a22/Gnaq/Lin7a/Pink1/Klf7/Midn/P2ry2/Cxcl12/Apln/Git1/Map2k6/Lrp5/Git2/Abcc4/Bcl2l1/Foxo1/Ucp2/Adora2a/Hmga1/Inhbb/Fzd4/Gja1/Orai1/P2rx7/Glul/Ica1/Syt15/Hfe/Syk/Arhgef7/Pde1c/Bmp6/Osm/Pim3/Tnfrsf11a/Slc8b1/Sncaip/Mctp1/Tbx3/Fcgr3/Sncg/Fcer1g/Rapgef4/Ptgs1/Arrb1/Syt7/Chd7/Igfbp3/Lyn/Sybu/Rph3al/Pparg/Acvr2b/Il1b/Cd300a/Plcb1/Tgm2/Lepr/Kcnb1/Mef2c/Ltbp4/Slc30a1/Entpd1/Prkcb/Abcg1/…
GO:0031103	axon regeneration	45	0.534466	1.68713	0.00467695	0.00467695	0.0238661	871	tags=22%, list=6%, signal=21%	Nrg1/Tnc/Enpp1/Ptn/Ptprs/Neo1/Lrp1/Mmp2/Dhfr/Ptprf
GO:0002283	neutrophil activation involved in immune response	14	-0.738931	-1.74639	0.00473025	0.00473025	0.0240817	3207	tags=79%, list=23%, signal=60%	Anxa3/Itgam/Abr/Bcr/Myo1f/Itgb2/Syk/Ptafr/Spi1/Fcer1g/Tyrobp
GO:0032611	interleukin-1 beta production	86	-0.454934	-1.57096	0.00473025	0.00473025	0.0240817	2243	tags=40%, list=16%, signal=33%	Casp4/Zc3h12a/Tmem106a/Lilrb4a/Jak2/Casp8/Tlr4/Tnf/Nlrp3/Ccl3/Ifi206/Nod1/Ifi207/Hspb1/Git1/Lpl/Mndal/Tlr2/Ccr5/P2rx7/Ifi209/Nod2/Tyrobp/Ifi203/Il1b/Cx3cr1/Cd36/Aim2/Gbp5/Slamf9/Trem2/Ifi213/Ifi208/Ccr7
GO:2000242	negative regulation of reproductive process	47	0.533016	1.69333	0.00476501	0.00476501	0.0242063	1942	tags=43%, list=14%, signal=37%	Timp1/Serpinf1/Lif/Knl1/Wnt5a/Ttk/Zfpm2/Trip13/Igf1/Sulf1/Pkmyt1/Calr/Prdx4/Fbxo5/Zwint/Plat/Snai1/Ada/Eaf2/Grb14
GO:2001212	regulation of vasculogenesis	16	-0.710118	-1.74446	0.00476584	0.00476584	0.0242063	2684	tags=69%, list=20%, signal=55%	Rin2/Tmem100/Rap1a/Rras/Rapgef2/Hey1/Ceacam1/Cd34/Ramp2/Kdr/Xdh
GO:0072678	T cell migration	51	-0.528228	-1.68114	0.00479568	0.00479568	0.0243013	2174	tags=47%, list=16%, signal=40%	Gpr183/Dock8/Adam17/Adam8/Plec/Myo1g/Msn/Cxcl10/Coro1a/Wnk1/Lgals9/Slc12a2/Cxcl12/Adam10/Il27ra/Aif1/Lrch1/Spns2/S1pr1/Itga4/Ccr2/Cd200/F11r/Ccr7
GO:0031663	lipopolysaccharide-mediated signaling pathway	51	-0.527873	-1.68001	0.00479568	0.00479568	0.0243013	1887	tags=55%, list=14%, signal=48%	Malt1/Nr2c2/Cd55/Traf6/Mapk1/Ptpn22/Nfkbil1/Cd180/Irak2/Tlr4/Ly96/Sash1/Plcg2/Trim12a/Trim5/Stat1/Trim12c/Mapk3/Cd14/Trim30d/Bmp6/Spi1/Lyn/Cd84/Trim30a/Ly86/Nos3/Trem2
GO:0006790	sulfur compound metabolic process	226	0.355513	1.38949	0.00482269	0.00482269	0.0244097	2639	tags=32%, list=19%, signal=26%	Phgdh/Ggt7/Dpep1/Enpp1/Cacna1a/Slc1a2/Acot11/Gstm5/Chpf/Angpt1/Ugdh/Sulf2/Sulf1/Pdk3/Chsy3/Pxylp1/Csgalnact1/Dse/Chst2/Fasn/Dsel/Sult5a1/Gsto1/Hs3st3a1/Mical2/Nudt19/Mvd/Gpc1/Hs6st1/Hs2st1/Chst12/Slc35b2/Ext1/Ggt5/Gcdh/Nox4/Hnmt/Mri1/Mthfd1/Gstz1/Chsy1/Mlycd/Ahcy/Chpf2/Hgsnat/Acsl3/Mical1/Mgst1/Gstm2/Acaca/Mvk/Suox/Mtap/Acat1/Gstp1/Mpc2/Arsb/Pemt/Comt/Galns/Hmgcs1/Mpc1/Acot1/Gstm4/Pdk1/Suclg1/Ghr…
GO:0032731	positive regulation of interleukin-1 beta production	59	-0.500164	-1.64476	0.0048507	0.0048507	0.0245135	2369	tags=47%, list=17%, signal=39%	Casp1/Casp4/Tmem106a/Jak2/Casp8/Tlr4/Tnf/Nlrp3/Ccl3/Ifi206/Nod1/Ifi207/Hspb1/Lpl/Mndal/Tlr2/Ccr5/P2rx7/Ifi209/Nod2/Tyrobp/Ifi203/Cd36/Aim2/Gbp5/Ifi213/Ifi208/Ccr7
GO:0070633	transepithelial transport	19	-0.677119	-1.75196	0.00486569	0.00486569	0.0245135	2751	tags=68%, list=20%, signal=55%	Abcc1/Actb/Abcg3/Edn1/Itpr1/Ostm1/Slc12a2/P2ry6/Abcg2/Abcb1b/Ednrb/Aqp1/Abcb1a
GO:0046461	neutral lipid catabolic process	19	-0.677111	-1.75194	0.00486569	0.00486569	0.0245135	1429	tags=42%, list=10%, signal=38%	Sorl1/Lpl/Mgll/Pnpla2/Pik3cg/Lipe/Apoc2/Gpihbp1
GO:0046464	acylglycerol catabolic process	19	-0.677111	-1.75194	0.00486569	0.00486569	0.0245135	1429	tags=42%, list=10%, signal=38%	Sorl1/Lpl/Mgll/Pnpla2/Pik3cg/Lipe/Apoc2/Gpihbp1
GO:0002009	morphogenesis of an epithelium	428	0.316933	1.32924	0.00488258	0.00488258	0.0245702	1744	tags=22%, list=13%, signal=20%	Vdr/Slit2/Sfrp1/Fst/Sfrp2/Cthrc1/Aldh1a3/Aldh1a2/Lif/Twist1/Osr1/Tnc/Adamts16/Fgf7/Rspo3/Fzd2/Kif26b/Col5a1/Sema3c/Stil/Enpp1/Mdk/Runx1/Wnt5a/Wnt11/Fat1/Mgp/Car9/Pdpn/Angpt1/Fzd1/Fgfr1/Egfr/Igf1/Irx3/Fgf2/Mmp2/Sulf1/Ahi1/Robo1/Tbx18/Fzd5/Pak1/Ptk7/Six2/Gli3/Fzd3/Csf1/Pard3/Maged1/Nkd1/Arhgap24/Kif20b/Nfatc4/Aldh1a1/Ift20/Hs3st3a1/Sema5a/Gbx2/Vegfa/Dlg3/Cyp7b1/Sox9/Six1/Pdgfra/Hgf/Rab23/Cd44/Bsg/T…
GO:0032753	positive regulation of interleukin-4 production	26	-0.62583	-1.74222	0.00489344	0.00489344	0.0245964	2545	tags=58%, list=18%, signal=47%	Rara/Gata3/Sash3/H2-T22/Nlrp3/Il20rb/H2-K1/Syk/H2-D1/Fcer1g/H2-Q4/H2-Q7/H2-Q6/H2-T23/Icosl
GO:0060760	positive regulation of response to cytokine stimulus	54	-0.521162	-1.66691	0.00492605	0.00492605	0.0247318	2751	tags=46%, list=20%, signal=37%	Edn1/Usp27x/Mavs/Casp1/Mmp12/Casp4/Adam17/Tbk1/Tlr4/Parp9/Ifih1/Crebrf/Tlr2/Trim56/Irgm2/Cd74/Igtp/Laptm5/Trim6/Cxcr4/Irf7/Nlrc5/Parp14/Irgm1/Trem2
GO:0042634	regulation of hair cycle	20	0.662527	1.7458	0.00495104	0.00495104	0.0248169	1619	tags=40%, list=12%, signal=35%	Fst/Cdh3/Wnt5a/Inhba/Tsku/Tgfb2/Tert/Smo
GO:2000514	regulation of CD4-positive, alpha-beta T cell activation	62	-0.489164	-1.62589	0.00495944	0.00495944	0.0248169	2381	tags=40%, list=17%, signal=33%	Il2ra/Gata3/Zc3h12a/Rc3h1/Runx3/Sash3/Cd24a/Nckap1l/Lgals9/Nlrp3/Tgfb1/Irf1/Jak3/Pf4/Sh3rf1/Cd83/Nfkbid/Hlx/Vsir/Il2rg/Ccr2/Irgm1/Gimap5/Cd274/Ccr7
GO:0045880	positive regulation of smoothened signaling pathway	36	0.568623	1.71786	0.00496008	0.00496008	0.0248169	2676	tags=56%, list=19%, signal=45%	Sfrp1/Prrx2/Tedc1/Scube2/Shox2/Evc/Rab34/Prrx1/Wnt9a/Armc9/Gas1/Tedc2/Smo/Chsy1/Dync2h1/Gpc3/Kif7/Uchl5/Gas8/Stk36
GO:0002224	toll-like receptor signaling pathway	61	-0.496836	-1.64508	0.00505347	0.00505347	0.0252552	1925	tags=56%, list=14%, signal=48%	Scimp/Tnip1/Tlr8/Gps2/App/Irf3/Ticam2/Irak3/Tlr13/Irf4/Esr1/Arrb2/Tirap/Nfkbil1/Lrch4/Tlr7/Tlr4/Otud4/Tlr1/Ly96/Plcg2/Cd86/Tnip3/Unc93b1/Rps6ka3/Irf1/Tlr2/Pik3ap1/Cd300a/Irf7/Trim30a/Tlr3/Cd36/Cd274
GO:0042476	odontogenesis	78	0.467208	1.60688	0.00509141	0.00509141	0.0254106	1719	tags=35%, list=12%, signal=30%	Fst/Osr1/Tnfsf11/Serpine1/Tnfrsf11b/Enpp1/Col1a1/Inhba/Aspn/Bmpr1a/Fgfr1/Hacd1/Osr2/Gli3/Csf1/Relt/Pdgfra/Nectin1/Fam20a/Wls/Runx2/Gli2/Gas1/Src/Apcdd1/Smo/Rspo2
GO:0046166	glyceraldehyde-3-phosphate biosynthetic process	10	0.787457	1.73568	0.00509624	0.00509624	0.0254106	1839	tags=70%, list=13%, signal=61%	Tpi1/Pgk1/Pgam1/Eno1/Pcx/Slc25a10/Gapdh
GO:0045833	negative regulation of lipid metabolic process	84	-0.45534	-1.57255	0.00511201	0.00511201	0.0254601	953	tags=19%, list=7%, signal=18%	Ppp2r5a/Acacb/Apobec1/Ceacam1/Il1b/Pik3cg/Fmo1/Apoe/Apoc2/Pdgfb/Pde8b/Gimap5/Ch25h/Akr1c14/Endou/Fmo2
GO:0043583	ear development	173	0.377887	1.43071	0.00513763	0.00513763	0.0255585	1484	tags=24%, list=11%, signal=21%	Cxcl14/Cthrc1/Prrx2/Aldh1a3/Col11a1/Osr1/Ephb2/Kcnma1/Lrig3/Bmper/Fzd2/Eya4/Enpp1/Wnt5a/Ror2/Prrx1/Fgfr1/Igf1/Sobp/Fgf2/Tbx18/Tsku/Osr2/Ttc39c/Ptk7/Six2/Diaph3/Gli3/Fzd3/Nfix/Ift20/Gbx2/Lrig1/Sox9/Six1/Tgfb2/Alms1/Gli2/Mcm2/Ift27/Gas1
GO:0030900	forebrain development	285	0.335146	1.3522	0.00516183	0.00516183	0.0256496	1488	tags=19%, list=11%, signal=18%	Mgarp/Slit2/Ptger3/Nrg1/Aldh1a3/Aldh1a2/Ephb2/Emx2/Ephb3/Dclk1/Tyro3/Stil/Pitx1/Mdk/Wnt5a/Mdga1/Slc1a2/Kif14/Inhba/Col3a1/Tubb2b/Aspm/Bmpr1a/Ptprs/Nr2f1/Dock7/Ncam1/Numbl/Fgfr1/Egfr/Fgf2/Robo1/Pak1/Tsku/Tacc3/Gli3/Rac3/Nfix/Sema5a/Myh10/Gbx2/E2f1/Tubb2a/Vax2/Axl/Ryk/Atf5/Kif21b/Pomt2/Cdh2/Tuba1a/Gli2/Htra2/Ext1/Mcph1
GO:0043367	CD4-positive, alpha-beta T cell differentiation	78	-0.463835	-1.57902	0.00518204	0.00518204	0.0257058	2765	tags=36%, list=20%, signal=29%	Tmem98/Bcl3/Batf/Rara/Gata3/Zc3h12a/Rc3h1/Gpr183/Runx3/Sash3/Il6ra/Nckap1l/Nlrp3/Tgfb1/Irf1/Jak3/Pf4/Sh3rf1/Cd83/Nfkbid/Ly9/Hlx/Il2rg/Ccr2/Gimap5/Gimap1/Rsad2/Ccr7
GO:0032612	interleukin-1 production	101	-0.429745	-1.52606	0.00518493	0.00518493	0.0257058	2243	tags=38%, list=16%, signal=32%	Casp4/Zc3h12a/Tmem106a/Lilrb4a/Jak2/Casp8/Nlrp10/Tlr4/Tnf/Lgals9/Il16/Nlrp3/Ccl3/Ifi206/Nod1/Ifi207/Hspb1/Git1/Lpl/Mndal/Tlr2/Ccr5/P2rx7/Ifi209/Nod2/Tyrobp/Ceacam1/Ifi203/Il1b/Cx3cr1/Cd36/Aim2/Gbp5/Slamf9/Trem2/Ifi213/Ifi208/Ccr7
GO:2000095	regulation of Wnt signaling pathway, planar cell polarity pathway	15	0.705116	1.72679	0.0051986	0.0051986	0.0257443	894	tags=27%, list=6%, signal=25%	Sfrp1/Sfrp2/Dact1/Nkd1
GO:0044706	multi-multicellular organism process	115	0.428416	1.54511	0.005221	0.005221	0.0258258	1123	tags=17%, list=8%, signal=16%	Vdr/Timp1/A2m/Lif/Hsd11b2/Fbn2/Ptgis/Pla2g4a/Avpr1a/Pcsk5/Il11ra1/Ptgs2/Ptn/Maged2/Mmp2/Hpgd/Vegfa/Serpine2/Sh3pxd2b/Vmp1
GO:0050654	chondroitin sulfate proteoglycan metabolic process	28	0.615212	1.758	0.00524084	0.00524084	0.0258946	2259	tags=54%, list=16%, signal=45%	Chpf/Igf1/Ugdh/Chsy3/Pxylp1/Csgalnact1/Dse/Dsel/Chst12/Slc35b2/Ext1/Chsy1/Chpf2/Arsb/Galns
GO:0030149	sphingolipid catabolic process	24	-0.639417	-1.73214	0.005255	0.005255	0.0259081	3072	tags=54%, list=22%, signal=42%	Smpd3/Gba2/Neu1/Galc/Smpd5/Vps54/Gm2a/Psap/Enpp2/Smpdl3a/Asah2/Acer2/Neu3
GO:0043372	positive regulation of CD4-positive, alpha-beta T cell differentiation	28	-0.608493	-1.71117	0.00525547	0.00525547	0.0259081	2081	tags=39%, list=15%, signal=33%	Sash3/Nckap1l/Nlrp3/Irf1/Cd83/Nfkbid/Hlx/Il2rg/Ccr2/Gimap5/Ccr7
GO:0002887	negative regulation of myeloid leukocyte mediated immunity	10	-0.789067	-1.73291	0.00531589	0.00531589	0.0261764	726	tags=70%, list=5%, signal=66%	Abr/Bcr/Spi1/Cd300a/Cd84/Cx3cr1/Ccr2
GO:0044057	regulation of system process	416	-0.322212	-1.33906	0.00532909	0.00532909	0.0262118	1476	tags=18%, list=11%, signal=17%	Adrb2/Cacng1/Inpp5k/Rgs2/Tnfrsf1b/Apln/Itga9/Mef2a/Dmd/Abcg2/Jarid2/Lmcd1/Foxo1/Inhbb/Gja1/Ehd3/Stc1/Ace/Dock4/Acacb/Cacna1h/Hip1r/Kcnj2/Bmp6/Notch1/Ece1/Ahr/Calcrl/Ptafr/Gch1/Mgll/Aif1/Agrn/Rapgef4/Ptgs1/Atp2b4/Tppp/Pparg/Afdn/Mef2c/Jup/Flt1/Itga4/Apoe/Itga2/Pdgfb/Unc13b/Cysltr1/Tnfrsf21/Kcnq1/Agtr2/Cav1/Kit/Ncf1/Shank3/Epas1/Jam2/Nos3/Hrc/Slc1a1/Ednrb/Kcna5/Gja5/Aqp1/Cd38/Edn3/Trpc3/Hopx/Gucy1a…
GO:0044403	biological process involved in symbiotic interaction	183	-0.373796	-1.44125	0.00533743	0.00533743	0.0262232	1893	tags=24%, list=14%, signal=21%	Grk2/Chmp1b/Ciita/Mid2/Sp1/Insr/Tusc2/Chmp2b/Ctsb/Ifitm1/Inpp5k/Trim12a/Ifitm3/Stom/Trim5/Hyal2/Trim56/Ly6e/Trim12c/Trim25/Nectin2/Nrp1/Trim30d/Csf1r/Ccl8/Cd74/Trim21/Nod2/Trim34a/Pglyrp1/Trim6/Trim30a/Cav2/Cx3cr1/Gbp2/Apoe/Cav1/Gbp3/Ncf1/Gbp7/Ch25h/Scarb1/Gbp9/Gbp6
GO:0010522	regulation of calcium ion transport into cytosol	16	-0.707829	-1.73883	0.00534792	0.00534792	0.0262451	1470	tags=38%, list=11%, signal=34%	Bmp4/P2rx7/Cav1/Gimap5/Trpc3/Akap5
GO:0006614	SRP-dependent cotranslational protein targeting to membrane	17	0.699018	1.78037	0.00538483	0.00538483	0.0263966	3067	tags=71%, list=22%, signal=55%	Tram1l1/Sec61b/Srprb/Sec61a1/Ssr3/Srp9/Srp19/Tram1/Srp72/Srp68/Srp54a/Sec63
GO:0042119	neutrophil activation	29	-0.616732	-1.74781	0.00539799	0.00539799	0.0264313	2252	tags=69%, list=16%, signal=58%	Anxa3/Grn/Traf3ip2/Itgam/Abr/Bcr/Kmt2e/Tnf/Il16/Plpp6/Myo1f/Il15/Itgb2/Syk/Ptafr/Spi1/Fcer1g/Tyrobp/Cd300a/Fcgr4
GO:0051962	positive regulation of nervous system development	288	0.334196	1.34746	0.00541005	0.00541005	0.0264606	1290	tags=18%, list=9%, signal=17%	Slit2/Nrg1/Serpinf1/Lif/Srpx2/Il33/Ephb2/Ephb3/Shox2/Obsl1/Crabp2/Thbs2/Mdk/Fn1/Wnt5a/Vcan/Prkca/Tpbg/Pak3/Ptn/Aspm/Tiam1/Numbl/Lrp1/Tnfrsf12a/Egfr/Acan/Igf1/Fgf2/Dbn1/Robo1/Arhgap32/Pak1/Gli3/Fzd3/Ptprf/Adgrl1/Bhlhb9/Sema5a/Mme/Vegfa/Serpine2/Cip2a/Egr2/E2f1/St8sia2/Wls/Fxn/Xrcc5/Plxnb2/Dlg4/Metrn/Cx3cl1
GO:0007188	adenylate cyclase-modulating G protein-coupled receptor signaling pathway	111	-0.420981	-1.50801	0.00541891	0.00541891	0.0264743	1951	tags=32%, list=14%, signal=28%	Adcy9/Cxcl10/Gna12/Grk2/Rapgef2/Htr7/Psap/Gnai2/P2ry12/Gnaq/Pde4b/Adrb2/Adgre5/Rgs2/Adora2a/Gpr65/Grk5/Adgrl2/Calcrl/Rapgef4/Atp2b4/Adcy4/Adgre1/Adgrl4/Adgrf5/Ramp2/S1pr1/Abca1/Pde2a/Adgrg1/Gpr4/S1pr4/Ramp3/Calcr/Chga/Akap5
GO:0060099	regulation of phagocytosis, engulfment	18	-0.676203	-1.72065	0.00542576	0.00542576	0.026478	1711	tags=61%, list=12%, signal=54%	Nckap1l/Plcg2/Stap1/Gata2/Abca7/Pparg/Cd300a/Itga2/Cd36/Fcgr1/Trem2
GO:0090329	regulation of DNA-templated DNA replication	35	0.566554	1.69176	0.00543331	0.00543331	0.0264852	1991	tags=43%, list=14%, signal=37%	E2f8/Ticrr/Dscc1/Blm/Fgfr1/Rfc4/Endog/Chtf18/Rfc5/Rfc2/Rfc3/Fbxo5/Pcna/Cdc7/Cdt1
GO:0001508	action potential	86	-0.450706	-1.55636	0.00546361	0.00546361	0.0266032	1259	tags=26%, list=9%, signal=23%	Gpd1l/Npr2/Pawr/Tnf/Gnaq/Dmd/Cln3/P2rx7/Cacna1h/Kcnj2/Rapgef4/Kcnb1/Jup/Scn3a/Kcnq1/Cd36/Cav1/Kcna5/Gja5/Atp1a2/Abcc9/Kcnj8
GO:0040008	regulation of growth	518	0.304934	1.29873	0.00548266	0.00548266	0.0266662	2225	tags=21%, list=16%, signal=19%	Dio3/Plaat1/Slit2/Rbp4/Ccn5/Sfrp1/Nrg1/Sfrp2/Ccn4/Tnc/Serpine1/Cgref1/P3h1/Tro/Ccn3/Brca1/Sema3c/Slit3/Crabp2/Enpp1/Fn1/Wnt5a/Wnt11/Dcbld2/Avpr1a/Sphk1/Kif14/Col14a1/Inhba/Zfpm2/P2rx5/Kcnk2/Fdps/Bmpr1a/Ptprs/H19/Ncam1/Sema6c/Lrp1/Serp1/Dnph1/Fgfr1/Tnfrsf12a/Egfr/Igf1/Fgf2/Dbn1/Cdk1/Ahi1/Arhgap32/Igfbp4/Pak1/Dact3/Stc2/C3/Csf1/Cryab/Ppib/Prr5/Eno1/Sema5a/Vegfa/Serpine2/Six1/Sh3pxd2b/Cd44/Ryk/Dusp1…
GO:0071277	cellular response to calcium ion	55	-0.506179	-1.63174	0.00550907	0.00550907	0.0267647	1822	tags=31%, list=13%, signal=27%	Mcoln1/Cpne7/Wnk1/Alox5ap/Plcg2/Mylk/Mef2a/Rasa4/Syt15/Itpkb/Syt7/Kcnb1/Mef2c/Chp2/Rasgrp2/Akr1c14/Akap5
GO:0031639	plasminogen activation	16	0.714404	1.79221	0.00552148	0.00552148	0.0267951	1586	tags=50%, list=12%, signal=44%	Serpine1/Thbs1/Pgk1/Eno1/Serpine2/Dhcr24/Plat/Eno1b
GO:0002468	dendritic cell antigen processing and presentation	13	-0.728539	-1.71607	0.0055517	0.0055517	0.0269118	829	tags=62%, list=6%, signal=58%	Nod1/Cd74/Cd68/Mpeg1/Nod2/Slc11a1/Fcgr4/Ccr7
GO:0006874	intracellular calcium ion homeostasis	219	-0.358211	-1.39627	0.00558951	0.00558951	0.027065	2015	tags=24%, list=15%, signal=21%	Tcirg1/Trpv4/Vps54/Cxcl10/Plcg1/Coro1a/Mcoln1/Tmem178/Anxa7/Grina/Tgfb1/Ptprc/Plcg2/P2ry2/Cd40/Dmd/Cln3/Slc24a5/Plcb4/Ccr5/P2rx7/Stc1/Gstm7/Cdh23/Ccl8/Slc8b1/Pik3cb/Atp13a2/Itpr3/Ptpn6/Atp2b4/Chd7/Lyn/Cngb1/Plcb1/Tgm2/Inpp4b/Slc30a1/Cav2/Prkcb/Apoe/Ccr2/Cav1/F2rl3/Atp2a3/Cdh5/Hrc/Clec4b1/Aplnr/Edn3/Trpc3/Chga/Casq2
GO:0007129	homologous chromosome pairing at meiosis	27	0.602542	1.71104	0.00562905	0.00562905	0.027183	2913	tags=48%, list=21%, signal=38%	4930447C04Rik/Ccne2/Ccne1/Trip13/Brip1/Psmc3ip/Ndc1/Fancd2/Syce2/Zcwpw1/Mlh1/Syde1/Cpeb1
GO:0009185	ribonucleoside diphosphate metabolic process	101	0.428489	1.51192	0.00562905	0.00562905	0.027183	1839	tags=28%, list=13%, signal=24%	Ak4/Ak1/Nupr1/Rrm2/Enpp1/Col6a1/Hk2/Entpd2/Igf1/Tpi1/Galk1/Pgk1/Pgam1/Rrm1/Eno1/Slc4a4/Gale/Umps/Ak2/Cad/Adpgk/Pkm/Ier3/Aldoa/Eno2/Eno1b/Guk1/Gapdh
GO:0050807	regulation of synapse organization	226	0.352529	1.37783	0.00563259	0.00563259	0.027183	1420	tags=19%, list=10%, signal=17%	Slit2/Zfp804a/Nrg1/Srpx2/C1ql3/Ephb2/Ephb3/Abi3bp/Thbs2/Wnt5a/Mdga1/Prkca/Tpbg/Ror2/Pak3/Ptn/Ptprs/Tiam1/Lrfn1/Numbl/Dact1/Fzd1/Dbn1/Magi2/Robo1/Itsn1/Lrfn4/Dtnbp1/Ptprf/Adgrl1/Nfatc4/Bhlhb9/Myh10/Ptpn13/Six1/Nectin1/St8sia2/Dlg4/Arf4/Farp1/Cdh2/Tuba1a
GO:0001837	epithelial to mesenchymal transition	145	0.385117	1.43396	0.00568936	0.00568936	0.0274266	1384	tags=19%, list=10%, signal=18%	Sfrp1/Sfrp2/Twist1/Loxl3/Epha3/Glipr2/Has2/Vasn/Loxl2/Col1a1/Mdk/Wnt5a/Tgfb3/Wnt11/Tiam1/Ncam1/Pdpn/Rian/Fgfr1/Dact3/Ezh2/Vegfa/Sox9/Pofut2/Slc39a6/Tgfb2/Ldlrad4/Fam83d
GO:0060135	maternal process involved in female pregnancy	39	0.558033	1.71286	0.00580292	0.00580292	0.0279431	447	tags=18%, list=3%, signal=17%	Vdr/Lif/Ptgis/Pla2g4a/Il11ra1/Ptgs2/Ptn
GO:0043010	camera-type eye development	257	0.345234	1.37658	0.00582696	0.00582696	0.0280279	1386	tags=19%, list=10%, signal=17%	Dio3/Rbp4/Twist2/Col8a2/Col8a1/Aldh1a3/Aldh1a2/Lif/Lmx1b/Twist1/Ephb2/Bmpr1b/Tulp1/Thy1/Cyp1b1/Fat1/Tenm3/Inhba/Ptn/Fjx1/Bfsp1/Megf11/Rcn1/Mab21l2/Egfr/Nphp4/Fgf2/Ahi1/Fzd5/Tsku/Osr2/C3/Ttll5/Gli3/Cryab/Nfix/Aldh1a1/Myh10/Vegfa/Sox9/Pdgfra/Nectin1/Vax2/Bsg/Tgfb2/Hmgn1/Alms1/Meis1/Lama1
GO:0007409	axonogenesis	355	0.319321	1.31391	0.00583431	0.00583431	0.0280323	1527	tags=19%, list=11%, signal=18%	Tubb3/Slit2/Artn/Ephb2/Bmpr1b/Ephb3/Dclk1/Epha3/Cdh11/Shox2/Ndn/Sema3c/Slit3/Crabp2/Tnn/Thy1/Map1a/Fn1/Wnt5a/Prkca/Cacna1a/Pak3/Ust/Tubb2b/Ptprs/Tiam1/Dock7/Matn2/Ncam1/Sema6c/Numbl/Emb/Neo1/Lrp1/Tnfrsf12a/Dbn1/Robo1/Arhgap32/Pak1/Tsku/Arhgef25/Gli3/Rac3/Fzd3/Nfix/Sema5a/Myh10/Gbx2/Vegfa/Egr2/Nectin1/Vax2/Unc5c/Ryk/Bsg/Tgfb2/Fxn/Plxnb2/Metrn/Ank3/Lama1/Lmo4/Cdh2/Gli2/Ext1/Gas1/Ifrd1/Brsk1/B4galt6
GO:1904889	regulation of excitatory synapse assembly	14	0.722493	1.75149	0.00584962	0.00584962	0.0280749	976	tags=36%, list=7%, signal=33%	Abi3bp/Ptprs/Lrfn1/Lrfn4/Ptpn13
GO:0051960	regulation of nervous system development	436	0.308632	1.29538	0.00587231	0.00587231	0.0281528	1789	tags=22%, list=13%, signal=19%	Slit2/Nrg1/Serpinf1/Lif/Srpx2/Il33/Ephb2/Ephb3/Cdkn2b/Shox2/Obsl1/Sema3c/Crabp2/Thbs2/S100b/Thy1/Bhlhe41/Mdk/Fn1/Wnt5a/Mdga1/Vcan/Prkca/Tpbg/Kif14/Pak3/Ptn/Aspm/Bmpr1a/Ptprs/Tiam1/Dock7/Sema6c/Numbl/Lrp1/Tnfrsf12a/Egfr/Acan/Igf1/Fgf2/Dbn1/Robo1/Arhgap32/Pak1/Kctd11/Gli3/Fzd3/Ptprf/Pard3/Ezh2/Ldlr/Adgrl1/Nfatc4/Wasf3/Bhlhb9/Sema5a/Gbx2/Mme/Vegfa/Ptpn13/Serpine2/Cip2a/Egr2/E2f1/Hgf/St8sia2/Ryk/Dusp…
GO:0051046	regulation of secretion	488	-0.306744	-1.29804	0.00590678	0.00590678	0.028287	2268	tags=28%, list=16%, signal=24%	Dab2/Fes/Stxbp2/Abr/Nr1h2/Pld2/Frmd4a/Jak2/Bcr/Lgals3/Ep300/Npy1r/Pnkd/Tcirg1/Slc4a8/Nr3c1/Il1rn/Rab11fip5/Rab8b/Grk2/Tlr4/Rab27a/Stxbp5/Tnf/Htr7/Vamp3/Wnk1/Nckap1l/Bmp2/Atp9a/Anxa7/Dpysl2/Gnai2/Lgals9/P2ry12/Cplx2/Myo6/Slc25a22/Tgfb1/Sdcbp/Slc12a2/Gnaq/Ric1/Rgcc/Pink1/Klf7/Midn/Cd2ap/P2ry2/Cxcl12/Tnfrsf1b/Apln/Git1/Map2k6/Gata2/Lrp5/Tlr2/Git2/Bcl2l1/Foxo1/Ucp2/Adora2a/Inhbb/Gja1/Oas2/Orai1/P2rx7…
GO:0098883	synapse pruning	12	-0.744377	-1.71696	0.00597227	0.00597227	0.0285692	599	tags=42%, list=4%, signal=40%	C1qb/C1qa/C1qc/Cx3cr1/Trem2
GO:0010972	negative regulation of G2/M transition of mitotic cell cycle	63	0.489259	1.61123	0.00598202	0.00598202	0.0285845	2392	tags=35%, list=17%, signal=29%	Clspn/Brca1/Orc1/Dtl/Ticrr/Blm/Creb3l1/Cdk1/Pkmyt1/Plk1/Donson/Bard1/Cdk5rap3/Brsk1/Ier3/Cdc6/Rint1/Atm/Chek1/Topbp1/Rbbp8/Rad50
GO:0007276	gamete generation	463	0.307539	1.29581	0.00604883	0.00604883	0.028872	2263	tags=20%, list=16%, signal=18%	Rbp4/Fst/Rbm46/Ptx3/Adamts16/Rpl39l/Bmpr1b/Tmem119/Cyp51/Ndn/Tnfaip6/Pla2g4a/Tyro3/Mcm8/Mdk/Ccdc136/4930447C04Rik/Adamts2/B4galnt1/Ttk/Inhba/Ptn/Aspm/H19/Top2a/M1ap/Pgm3/Trip13/Igf1/Brip1/Spaca1/Meg3/Ddias/Fancf/Ttll5/Pafah1b3/Nkd1/Rad18/Ift20/Chtf18/Dnmt3l/Spata24/Sox9/Cip2a/Plk1/Mastl/Suv39h2/Gas2/Mns1/Fanca/Axl/Ndc80/Bsg/Pygo1/Mast2/Spire1/Ccdc34/Crtap/Cenpe/Armc2/Alms1/Utp14b/Brca2/Fosl1/Ift2…
GO:0044790	suppression of viral release by host	19	-0.667591	-1.7273	0.00605584	0.00605584	0.0288739	2046	tags=53%, list=15%, signal=45%	Trim11/Mid2/Trim12a/Trim5/Trim56/Trim12c/Trim25/Trim30d/Trim21/Trim30a
GO:0021915	neural tube development	160	0.37973	1.42443	0.00607317	0.00607317	0.0289249	1709	tags=21%, list=12%, signal=18%	Sfrp1/Sfrp2/Cthrc1/Aldh1a2/Twist1/Phgdh/Fzd2/Sema3c/Stil/En1/Dzip1l/Wnt5a/Dact1/Fzd1/Ptk7/Gli3/Fzd3/Kif20b/Gbx2/Rab23/Tmem107/Tgfb2/Plxnb2/Lmo4/Mthfd1l/Gli2/Gas1/Bmp5/Tmed2/Smo/Plod3/Mthfd1/Nup50
GO:0006817	phosphate ion transport	17	0.694526	1.76892	0.00608214	0.00608214	0.0289359	1366	tags=29%, list=10%, signal=27%	Vdr/Fgfr1/Stc2/Slc20a1/Slc25a10
GO:0140029	exocytic process	70	-0.473129	-1.59269	0.00612477	0.00612477	0.029107	2962	tags=36%, list=22%, signal=28%	Stx3/Cadps2/Rab12/Stxbp1/Napb/Synj1/Exoc2/Stxbp2/Trarg1/Rab8b/Ralb/Stxbp5/Cplx2/Bloc1s6/Exoc8/Plek/Syk/Fcer1g/Syt7/Lyn/Cd300a/Kcnb1/Exoc6/Unc13b/Rab3b
GO:0030901	midbrain development	31	0.592631	1.73834	0.0061982	0.0061982	0.0294238	1157	tags=32%, list=8%, signal=30%	Sfrp1/Sfrp2/Lmx1b/En1/Wnt5a/Fgfr1/Fgf2/Fzd3/Ryk/Wls
GO:2000404	regulation of T cell migration	39	-0.551853	-1.64526	0.00624645	0.00624645	0.0296206	2095	tags=44%, list=15%, signal=37%	Dock8/Adam17/Adam8/Cxcl10/Coro1a/Wnk1/Lgals9/Cxcl12/Adam10/Il27ra/Aif1/Lrch1/Spns2/Itga4/Ccr2/Cd200/Ccr7
GO:0034764	positive regulation of transmembrane transport	166	-0.384394	-1.45911	0.00628275	0.00628275	0.0297408	2116	tags=27%, list=15%, signal=23%	Arl6ip1/Adipor2/Acsl5/Crebl2/Cxcl10/Plcg1/Wnk1/Insr/Stac/Plcg2/Adrb2/Bmp4/Atp1b3/Mef2a/Sorbs1/Dmd/Cnksr3/Rnasel/Ikbkb/Ehd3/P2rx7/Gstm7/Kcnj2/Abcb1b/Plcb1/Chp2/Ctss/Rapgef3/Kcnq1/Cav1/Gimap5/Shank3/Atp1b2/F2rl3/Trem2/Car2/Lrrc55/Clec4b1/Aplnr/Edn3/Trpc3/Abcb1a/Akap5/Tesc
GO:0001818	negative regulation of cytokine production	234	-0.357305	-1.4047	0.00628544	0.00628544	0.0297408	1743	tags=26%, list=13%, signal=23%	Cd24a/Nckap1l/Tusc2/Lgals9/Nlrp3/Tgfb1/Ptprc/Rgcc/N4bp1/Cd2ap/Il10/Git1/Il20rb/Tlr2/Bst2/Lrrc32/Nmi/Mertk/Jak3/Zfpm1/Inhbb/Cd83/Rnf125/Il27ra/Irgm2/Hfe/Epha2/Nod2/Ptpn6/Oas1a/Tyrobp/Igtp/Trib2/Arrb1/Pglyrp1/Ceacam1/Inpp5d/Pparg/Laptm5/Cd34/Fcgr2b/Cd84/Flt1/Xaf1/Trim30a/Vsir/Cx3cr1/Srgn/Dll1/Hdac9/Sigirr/Tnfrsf21/Irgm1/Slc11a1/Gimap5/Gbp4/Cd200/Trem2/Cd274/Ccr7
GO:0051604	protein maturation	404	0.316583	1.31961	0.00630618	0.00630618	0.0298066	2783	tags=31%, list=20%, signal=25%	Pcsk9/Tfr2/Comp/Fkbp11/Nkd2/Serpine1/Thbs1/P3h1/F3/Ifi205/Spon1/Aebp1/Ccbe1/Txndc5/Adamts2/Fbln1/Pcsk5/Dnajc25/Ptges3l/Bag2/Fkbp10/Ece2/Arxes1/Dnajb3/P4hb/Pgk1/Bmp1/Gli3/Nol3/Arxes2/Cryab/Hspa5/Pdia5/Ppib/Eno1/Mme/Gsn/Ifi211/Serpine2/Fkbp5/Serpinh1/Fkbp9/Pofut2/Tasp1/C1rl/Pdia3/Nudcd2/Asph/Dnajc3/Fxn/Dhcr24/Sec11a/Yipf5/Pdia4/Sdf2l1/Bace1/Hsp90b1/H13/Hspd1/Mmp16/Spcs1/Calr/Gas1/Adamts3/Pcsk6/Anpe…
GO:0010837	regulation of keratinocyte proliferation	37	0.553394	1.68104	0.00633301	0.00633301	0.0299	327	tags=16%, list=2%, signal=16%	Vdr/Twist2/Cdh3/Fgf7/Has2/Mdk
GO:0099004	calmodulin dependent kinase signaling pathway	13	-0.72053	-1.69721	0.00633967	0.00633967	0.0299	936	tags=38%, list=7%, signal=36%	Irgm2/Igtp/Irgm1/Trem2/Kcnj8
GO:0035966	response to topologically incorrect protein	117	0.405677	1.46343	0.00636304	0.00636304	0.0299778	2293	tags=30%, list=17%, signal=25%	Thbs4/Comp/Thbs1/Creb3l3/Hspb8/Serp2/Manf/Serp1/Creb3l1/Selenos/Stc2/Hspa5/Tbl2/Dnajc3/Pdia6/Cdk5rap3/Sdf2l1/Erlec1/Hspd1/Derl2/Derl1/Parp8/Tmed2/Hsp90aa1/Creb3/Hsph1/Wfs1/Stt3b/Tmtc4/Tm7sf3/Tram1/Ptpn2/Dnajb9/Stub1/Casp12
GO:0046545	development of primary female sexual characteristics	84	0.450907	1.55592	0.00638933	0.00638933	0.0300691	1367	tags=26%, list=10%, signal=24%	Sfrp1/Fst/Ptx3/Fgf7/Serpine1/Bmpr1b/Tnfaip6/Pla2g4a/Nupr1/Runx1/Inhba/Zfpm2/Angpt1/Mmp2/Ptprn/Fancf/Vegfa/Pdgfra/Gas2/Fanca/Nup107/Brca2
GO:0010633	negative regulation of epithelial cell migration	61	-0.490657	-1.62462	0.00639633	0.00639633	0.0300696	2247	tags=51%, list=16%, signal=43%	Gadd45a/Krit1/Adipor1/Tgfbr3/Evl/Patz1/Tnf/Meox2/Tgfb1/Nr2f2/Hdac5/Rgcc/Angpt2/Dab2ip/Stc1/Ptprm/Notch1/Atp2b4/Vash1/Sp100/Pparg/Adamts9/Ptprg/Mef2c/Jup/Ptprr/Robo4/Apoe/Card10/Mmrn2/Dll4
GO:0034142	toll-like receptor 4 signaling pathway	56	-0.513733	-1.66212	0.00642373	0.00642373	0.0301659	4035	tags=54%, list=29%, signal=38%	Oas1g/Ripk2/Scimp/Irf3/Ticam2/Oas1c/Pik3r1/Peli1/Rela/Nr1h3/Appl2/Traf6/Ptpn22/Tirap/Nr1d1/Irak2/Znrf1/Tbk1/Tlr4/Ly96/Tnip3/Dab2ip/Nmi/Cd14/Ifi35/Oas1a/Pik3ap1/Lyn/Nepn/Trem2
GO:0007417	central nervous system development	687	0.28738	1.24266	0.0064613	0.0064613	0.0303096	1626	tags=18%, list=12%, signal=16%	Ecrg4/Mgarp/Slit2/Ptger3/Sfrp1/Nrg1/Sfrp2/Aldh1a3/Aldh1a2/Lif/Lmx1b/Loxl3/Phgdh/Il33/Ephb2/Bmpr1b/Emx2/Ephb3/Dclk1/Cdh11/Meis3/Ndn/Tyro3/Stil/Enpp1/En1/Pitx1/Mdk/Runx1/Wnt5a/Mdga1/Meis2/Vcan/Prkca/Cacna1a/Slc1a2/B4galt2/Sphk1/Kif14/Ror2/Inhba/Col3a1/Ptn/Tubb2b/Aspm/Ccdc134/Bmpr1a/Ptprs/Nr2f1/Dock7/Ncam1/Numbl/Lrp1/Hoxc10/Fgfr1/Egfr/Acan/Ang/Igf1/Smarca1/Fgf2/Robo1/Pak1/Pcdh18/Tsku/Tacc3/C3/Gli3/R…
GO:0006650	glycerophospholipid metabolic process	222	-0.351982	-1.37789	0.0064718	0.0064718	0.0303263	2975	tags=32%, list=22%, signal=25%	Gpcpd1/Pgap2/Inpp5b/Atg14/Pigt/Sacm1l/Pld1/Pip4k2b/Pik3r3/Ip6k1/Smg1/Mtmr2/Mtmr1/Plcb2/Dgkq/Fabp5/Synj1/Inpp5a/Vac14/Mtmr3/Bpnt1/Nr1h2/Pld2/Becn1/Pigq/Plcg1/Dgkd/Inpp5f/Pik3c2a/Enpp2/Socs3/Gdpd3/Lpcat4/Etnk1/Mtmr12/Plcg2/Pip5k1c/Pnpla6/Inpp5k/Mboat2/Cish/Mtmr10/Dgkz/Mtmr11/Dgkh/Ttc7b/Cln3/Inpp1/Dgka/Plcb4/Plek/Cdipt/Lpcat2/Mtm1/Pik3cb/Itpkb/Cds2/Gdpd1/Inpp5d/Plcb1/Pla2g7/Pik3cg/Efr3b/Inpp4b/Cds1/…
GO:0008589	regulation of smoothened signaling pathway	81	0.468644	1.615	0.0064849	0.0064849	0.030355	2676	tags=38%, list=19%, signal=31%	Sfrp1/Prrx2/Tedc1/Scube2/Shox2/Enpp1/Evc/Rab34/Prrx1/Wnt9a/Kctd11/Gli3/Serpine2/Rab23/Armc9/Runx2/Gli2/Gas1/Tmed2/Tedc2/Smo/Chsy1/Gpr161/Dync2h1/Gpc3/Kif7/Ift81/Uchl5/Tulp3/Gas8/Stk36
GO:0032651	regulation of interleukin-1 beta production	82	-0.438495	-1.50326	0.0064993	0.0064993	0.0303898	2243	tags=39%, list=16%, signal=33%	Casp4/Zc3h12a/Tmem106a/Lilrb4a/Jak2/Casp8/Tlr4/Tnf/Nlrp3/Ccl3/Ifi206/Nod1/Ifi207/Hspb1/Git1/Lpl/Mndal/Tlr2/Ccr5/P2rx7/Ifi209/Nod2/Tyrobp/Ifi203/Cx3cr1/Cd36/Aim2/Gbp5/Trem2/Ifi213/Ifi208/Ccr7
GO:1901137	carbohydrate derivative biosynthetic process	495	0.303861	1.28805	0.0065291	0.0065291	0.0304964	2330	tags=26%, list=17%, signal=22%	Galnt17/Has1/Il33/Ak1/Galnt16/B3gnt9/Gfpt2/Has2/Rrm2/Mgat3/B4galnt1/Mlec/Gmppb/Pmm1/Chpf/Galnt5/Angpt1/Gk5/Dnph1/Pgm3/Acan/Igf1/Ugdh/Ostc/Gmds/Tpi1/Chst10/Pdk3/Pgk1/Chsy3/Pxylp1/Adcy2/Csgalnact1/Nme2/Pgam1/Gnpnat1/Rrm1/Adcy7/Dse/Nme4/Dcakd/Ddost/Eno1/Hs3st3a1/Dut/Itm2a/Gxylt2/Rpn1/Pofut2/Umps/Uck2/Pygl/Gfpt1/St8sia2/Tk1/Adk/Dad1/Soat1/Hs6st1/Pcx/Nme1/Hs2st1/Phlda1/Pomt2/Nanp/Chst12/Slc25a10/Uggt2…
GO:0070314	G1 to G0 transition	15	0.70135	1.71757	0.00656463	0.00656463	0.0306295	1462	tags=27%, list=11%, signal=24%	Ecrg4/Phgdh/Ezh2/Zfp503
GO:0006890	retrograde vesicle-mediated transport, Golgi to endoplasmic reticulum	44	0.530933	1.65734	0.00659689	0.00659689	0.0307471	2482	tags=43%, list=18%, signal=36%	Kdelr3/Copz2/Copb2/Kdelr2/Sec22b/Nbas/Rer1/Arf4/Kdelr1/Cope/Bet1l/Gbf1/Rint1/Copa/Ergic3/Stx18/Scfd1/Arcn1/Arf5
GO:2000052	positive regulation of non-canonical Wnt signaling pathway	12	0.743344	1.73779	0.00670197	0.00670197	0.0312035	894	tags=33%, list=6%, signal=31%	Sfrp1/Rspo3/Wnt5a/Nkd1
GO:0002260	lymphocyte homeostasis	76	-0.461902	-1.56823	0.00671715	0.00671715	0.0312408	2381	tags=49%, list=17%, signal=40%	Pik3cd/Bcl2a1a/Traf3ip2/Pacs1/Rc3h2/Ccnb2/Bcl2/Bak1/Il2ra/Wdr37/Stat5b/Sos1/Rc3h1/Sash3/Tcirg1/Coro1a/Cd24a/Nckap1l/Sos2/Tgfb1/Tnfrsf13b/Il20rb/Jak3/Ikbkb/Pkn1/P2rx7/Tsc22d3/Cd74/Ahr/Il7r/Lmo1/Pirb/Lyn/Spns2/Mef2c/Aim2/Gimap5
GO:0042445	hormone metabolic process	118	0.404583	1.46127	0.00674405	0.00674405	0.0313325	1559	tags=27%, list=11%, signal=24%	Dio3/Rbp4/Aldh1a3/Aldh1a2/Rbp1/Bmpr1b/Kcnma1/Crabp2/Ctsk/Enpp1/Cyp1b1/Cacna1a/Pcsk5/Selenom/Ece2/Igf1/Chst10/P4hb/Stc2/H6pd/Spp1/Aldh1a1/Mme/Dkk3/Pdgfra/Hsd11b1/Yipf5/Hsd17b7/Hsp90b1/Star/Pcsk6/Bmp5
GO:0009132	nucleoside diphosphate metabolic process	105	0.415686	1.47853	0.00679366	0.00679366	0.0315293	1839	tags=29%, list=13%, signal=25%	Ak4/Ak1/Nupr1/Rrm2/Enpp1/Col6a1/Hk2/Entpd2/Igf1/Tpi1/Galk1/Pgk1/Pgam1/Rrm1/Entpd6/Eno1/Slc4a4/Gale/Umps/Ak2/Cad/Adpgk/Dtymk/Pkm/Ier3/Aldoa/Eno2/Eno1b/Guk1/Gapdh
GO:0099068	postsynapse assembly	37	0.550692	1.67284	0.0068515	0.0068515	0.0317639	1410	tags=32%, list=10%, signal=29%	C1ql3/Ephb2/Abi3bp/Wnt5a/Ptprs/Lrfn1/Dock7/Numbl/Magi2/Lrfn4/Nrxn2/Cdh2
GO:0030178	negative regulation of Wnt signaling pathway	134	0.396377	1.46097	0.00686239	0.00686239	0.0317806	984	tags=19%, list=7%, signal=17%	Sfrp1/Sfrp2/Cthrc1/Nkd2/Wnt5b/Tnn/Mdk/Wnt5a/Wnt11/Tpbg/Ror2/Rbms3/Lrp1/Dact1/Bicc1/Fzd1/Nphp4/Tbx18/Dact3/Tsku/Gli3/Nkd1/Nfatc4/Dkk3/Sox9
GO:0010885	regulation of cholesterol storage	12	-0.737534	-1.70118	0.00689107	0.00689107	0.0318391	1266	tags=58%, list=9%, signal=53%	Nr1h2/Lpl/Msr1/Pparg/Cd36/Trem2/Scarb1
GO:0086005	ventricular cardiac muscle cell action potential	18	-0.667747	-1.69913	0.00689595	0.00689595	0.0318391	522	tags=28%, list=4%, signal=27%	Jup/Kcnq1/Cav1/Gja5/Kcnj8
GO:0045586	regulation of gamma-delta T cell differentiation	11	-0.750033	-1.69675	0.00690425	0.00690425	0.0318391	2343	tags=64%, list=17%, signal=53%	Lck/Stat5b/Nckap1l/Ptprc/Syk/Sox13/Gimap5
GO:0046643	regulation of gamma-delta T cell activation	11	-0.750033	-1.69675	0.00690425	0.00690425	0.0318391	2343	tags=64%, list=17%, signal=53%	Lck/Stat5b/Nckap1l/Ptprc/Syk/Sox13/Gimap5
GO:0060325	face morphogenesis	34	0.57672	1.72155	0.00695338	0.00695338	0.0320187	1242	tags=26%, list=9%, signal=24%	Twist2/Scx/Col1a1/Tgfb3/Mmp2/Pdgfra/Asph/Tgfb2/Crispld2
GO:0045807	positive regulation of endocytosis	156	-0.380909	-1.43922	0.00695789	0.00695789	0.0320187	1862	tags=31%, list=14%, signal=27%	Rab27a/Dgkd/Ldlrap1/Cbl/Insr/Nckap1l/Ptprc/Plcg2/Stap1/Actn4/Apln/Sele/Dcx/Cln3/Gata2/Mertk/Bcl2l1/Rapgef1/Hip1/Cd14/Il15/Clu/Hip1r/Hfe/Dock2/Syk/B2m/Abca7/Myo18a/Fcgr3/Fcer1g/Nod2/Arrb1/Pparg/Cd151/Fcgr2b/Apoe/Itga2/Il2rg/Dll1/Cd36/Fcgr1/Slc11a1/Cav1/Vtn/Ntf3/Trem2/Ighm/Ccr7
GO:0043124	negative regulation of canonical NF-kappaB signal transduction	54	-0.513755	-1.64322	0.0070115	0.0070115	0.0322314	2933	tags=39%, list=21%, signal=31%	Esr1/Arrb2/Tnip2/Nfkbil1/Nr1d1/Tle1/Rhoh/Zc3h12a/Lilrb4a/Tgfbr3/Casp8/Tank/Tnip3/Dab2ip/Stat1/Uaca/Nfkbid/Irgm2/Igtp/Irgm1/Trem2
GO:0051315	attachment of mitotic spindle microtubules to kinetochore	24	0.632993	1.76753	0.00707799	0.00707799	0.0325028	2084	tags=46%, list=15%, signal=39%	Birc5/Ska1/Ska3/Incenp/Cdca8/Aurkb/Ndc80/Nuf2/Cenpe/Cdt1/Mis12
GO:1903169	regulation of calcium ion transmembrane transport	136	-0.384828	-1.42092	0.00708788	0.00708788	0.0325139	1592	tags=25%, list=12%, signal=22%	Cxcl10/Fyn/Plcg1/Coro1a/Stac/Tgfb1/Pde4b/Plcg2/Adrb2/Bmp4/Cacng1/Dmd/Ehd3/P2rx7/Gstm7/Dysf/Ahr/Mrln/Ptpn6/Chd7/Lyn/Pik3cg/Rapgef3/Cav1/Gimap5/F2rl3/Hrc/Tspan13/Clec4b1/Aplnr/Trpc3/Atp1a2/Akap5/Casq2
GO:0090267	positive regulation of mitotic cell cycle spindle assembly checkpoint	12	0.740936	1.73216	0.00724432	0.00724432	0.033177	1104	tags=50%, list=8%, signal=46%	Birc5/Incenp/Cdca8/Aurkb/Ndc80/Gen1
GO:1905874	regulation of postsynaptic density organization	15	0.697967	1.70928	0.00724765	0.00724765	0.033177	1410	tags=40%, list=10%, signal=36%	Abi3bp/Ptprs/Lrfn1/Dbn1/Lrfn4/Cdh2
GO:0002320	lymphoid progenitor cell differentiation	22	-0.622261	-1.6433	0.00731583	0.00731583	0.0334189	2776	tags=50%, list=20%, signal=40%	Bcl2/Batf/Gata3/Xrcc4/Sos1/Sos2/Bmp4/Hmga1/Notch1/Spi1/Kit
GO:0070830	bicellular tight junction assembly	47	-0.523382	-1.63927	0.00731583	0.00731583	0.0334189	1475	tags=34%, list=11%, signal=30%	Cldn34c1/Micall2/Actn4/Ikbkb/Gja1/Cldn15/Tjp1/Epha2/Afdn/Cldn5/Ramp2/Pecam1/Prkch/Esam/Cdh5/F11r
GO:0051338	regulation of transferase activity	574	-0.29456	-1.25732	0.00738453	0.00738453	0.0336974	2103	tags=22%, list=15%, signal=20%	Apc/Dusp1/Adam17/Deptor/Ret/Plec/Ccny/Tigar/Cdkn1c/Dipk2a/Ralb/Tlr4/Rapgef2/Il6ra/Ptpro/Tnf/Hmbox1/Sfn/Tlr1/Cbl/Cd24a/Pkib/Insr/Bmp2/Dusp7/Sash1/Parp4/Arrdc4/Ptprc/Gnaq/Cd86/Nr2f2/Adrb2/Synpo2/Rgcc/Heg1/Inpp5k/Midn/Rgs2/Adar/Cd40/Fgfr3/Dab2ip/Adarb1/Hspb1/Map2k6/Gprc5b/Hyal2/Pxn/C5ar1/Fbxo7/Mertk/Rassf2/Flt4/Fgd2/Pkn1/Fzd4/Dusp22/Mapk3/P2rx7/Ppp2r5a/Dusp3/Irgm2/Dtx3l/Tcim/Ccng2/Syk/Pdgfd/Dbndd2/C…
GO:0006470	protein dephosphorylation	204	-0.353026	-1.3738	0.00739973	0.00739973	0.0337314	2087	tags=27%, list=15%, signal=23%	Cttnbp2nl/Ppp6r1/Mtmr3/Swap70/Ptpn14/Dusp1/Nck2/Dusp26/Ppm1j/Nceh1/Mgat5/Ptpn12/Ppp6r3/Gna12/Ptpro/Tnf/Nckap1l/Cdc14a/Slc39a10/Dusp7/Nck1/Ppm1k/Tgfb1/Ptprc/Ptpre/Ctdsp1/Pink1/Ppm1l/Ptpn4/Ssh2/Ppm1h/Tns2/Ppp1r2/Ikbkb/Eya1/Dusp2/Dusp22/Ppp2r5a/Dusp3/Ptprm/Itga1/Mtm1/Ppm1f/Ptprk/Ptpn6/Pirb/Cd300a/Ptprg/Ptprb/Ptprr/Ptpn18/Ptp4a3/Ppp1r16b/Agtr2/Cdh5
GO:0009595	detection of biotic stimulus	34	-0.560971	-1.63006	0.00745846	0.00745846	0.0339636	1887	tags=50%, list=14%, signal=43%	Tlr4/Tlr1/Ly96/Nlrp3/Nod1/Tlr2/H2-K1/H2-D1/Nod2/Naip2/Pglyrp1/H2-Q4/H2-Q7/H2-Q6/Trem2/Scarb1/Dach1
GO:0043312	neutrophil degranulation	11	-0.746805	-1.68945	0.00747214	0.00747214	0.0339904	3207	tags=82%, list=23%, signal=63%	Anxa3/Itgam/Abr/Bcr/Myo1f/Itgb2/Syk/Ptafr/Spi1
GO:0048568	embryonic organ development	378	0.315898	1.30573	0.00751666	0.00751666	0.0341573	1052	tags=17%, list=8%, signal=16%	Rbp4/Twist2/Gjb5/Mfap5/Cthrc1/Prrx2/Aldh1a3/Aldh1a2/Lif/Col11a1/Twist1/Osr1/Ephb2/Rspo3/Lrig3/Fzd2/Shox2/Col27a1/Eya4/Stil/Enpp1/En1/Mfap2/Runx1/Wnt5a/Tbx15/Tgfb3/Wnt11/Pkdcc/Pcsk5/Plk4/Ror2/Zfpm2/Alx4/Tubb2b/Ccdc134/E2f8/Bmpr1a/Slc8a1/Prrx1/Wnt9a/Fgfr1/Egfr/Sobp/Tbx18/Fzd5/Osr2/Vash2/Ttc39c/Ptk7/Six2/Gli3/Fzd3/Hoxc9/Aldh1a1/Gbx2/Vegfa/Lrig1/Sox9/Six1/Tead3/Pdgfra/Vax2/Itgav
GO:0001547	antral ovarian follicle growth	11	0.746007	1.70167	0.00761578	0.00761578	0.0345409	1055	tags=36%, list=8%, signal=34%	Ptx3/Bmpr1b/Tnfaip6/Gas2
GO:0006937	regulation of muscle contraction	113	-0.390719	-1.40046	0.0076178	0.0076178	0.0345409	1963	tags=27%, list=14%, signal=24%	Trpv4/Grk2/Pawr/Tnnc2/Htr7/Pde4b/Adrb2/Cacng1/Rgs2/Dmd/Ehd3/Stc1/Dock4/Cacna1h/Kcnj2/Calcrl/Ptafr/Agrn/Ptgs1/Jup/Flt1/Itga2/Kcnq1/Cav1/Kit/Ncf1/Gja5/Gucy1a1/Atp1a2/Chga/Casq2
GO:0071900	regulation of protein serine/threonine kinase activity	253	-0.342739	-1.35899	0.00762487	0.00762487	0.0345409	2103	tags=28%, list=15%, signal=24%	Apc/Dusp1/Adam17/Ccny/Cdkn1c/Dipk2a/Ralb/Tlr4/Rapgef2/Tnf/Sfn/Cd24a/Pkib/Insr/Bmp2/Dusp7/Sash1/Ptprc/Nr2f2/Adrb2/Synpo2/Rgcc/Heg1/Inpp5k/Rgs2/Cd40/Dab2ip/Map2k6/Hyal2/Fbxo7/Fgd2/Fzd4/P2rx7/Irgm2/Tcim/Ccng2/Syk/Pdgfd/Tnxb/Tnfrsf11a/Ptpn6/Igtp/Atp2b4/Trib2/Ceacam1/Lyn/Arhgef5/Pparg/Il1b/Spry4/Cd300a/Pik3cg/Kitl/Flt1/Map3k1/Rasip1/Ccnd1/Apoe/Map3k11/Pdgfb/Prkch/Hhex/Irgm1/Cav1/Kit/Ntf3/Pik3r6/C1qtnf…
GO:1900227	positive regulation of NLRP3 inflammasome complex assembly	20	-0.640954	-1.67006	0.00769791	0.00769791	0.0348356	2909	tags=50%, list=21%, signal=39%	Ptpn22/Mavs/Ddx3x/Casp4/Mark4/Tlr4/Atat1/Plcg2/Cd36/Gbp5
GO:0010596	negative regulation of endothelial cell migration	48	-0.522866	-1.64368	0.00774198	0.00774198	0.0349987	1850	tags=50%, list=13%, signal=43%	Patz1/Tnf/Meox2/Tgfb1/Nr2f2/Hdac5/Rgcc/Angpt2/Dab2ip/Stc1/Ptprm/Notch1/Atp2b4/Vash1/Sp100/Pparg/Adamts9/Mef2c/Jup/Robo4/Apoe/Card10/Mmrn2/Dll4
GO:0002269	leukocyte activation involved in inflammatory response	43	-0.532016	-1.62289	0.0077629	0.0077629	0.0350206	1887	tags=44%, list=14%, signal=38%	Tlr4/Nampt/Tnf/Tlr1/Stap1/Ifngr1/Tlr2/C5ar1/Tafa3/Clu/Csf1r/Aif1/Tyrobp/Pparg/C1qa/Cx3cr1/Tlr3/Trem2/Kcnj8
GO:0090257	regulation of muscle system process	195	-0.368519	-1.43226	0.0077629	0.0077629	0.0350206	1999	tags=25%, list=15%, signal=22%	Nr3c1/Trpv4/Pde9a/Grk2/Pawr/Tnnc2/Htr7/Igfbp5/Pde4b/Adrb2/Cacng1/Rgs2/Tnfrsf1b/Mef2a/Dmd/Jarid2/Lmcd1/Foxo1/Ehd3/Stc1/Dock4/Acacb/Cacna1h/Kcnj2/Notch1/Ece1/Calcrl/Ptafr/Aif1/Agrn/Ptgs1/Atp2b4/Pparg/Mef2c/Jup/Flt1/Itga2/Kcnq1/Cav1/Kit/Ncf1/Nos3/Hrc/Gja5/Trpc3/Gucy1a1/Atp1a2/Chga/Casq2
GO:0001738	morphogenesis of a polarized epithelium	55	0.493507	1.60401	0.0078151	0.0078151	0.0352025	1513	tags=27%, list=11%, signal=24%	Sfrp1/Sfrp2/Cthrc1/Fzd2/Wnt5a/Fat1/Fzd1/Ahi1/Ptk7/Fzd3/Ift20/Dlg3/Alms1/Lama1/Brsk1
GO:0051307	meiotic chromosome separation	10	0.776648	1.71186	0.00781938	0.00781938	0.0352025	2002	tags=80%, list=15%, signal=68%	Knl1/Ttk/Top2a/M1ap/Espl1/Zwint/Ncaph/Ncapd3
GO:0043297	apical junction assembly	56	-0.50626	-1.63794	0.00800627	0.00800627	0.0360067	1571	tags=32%, list=11%, signal=29%	Tnf/Ctnna1/Cldn34c1/Micall2/Actn4/Ikbkb/Gja1/Cldn15/Tjp1/Epha2/Afdn/Cldn5/Ramp2/Pecam1/Prkch/Esam/Cdh5/F11r
GO:0001101	response to acid chemical	93	0.432801	1.51853	0.00802896	0.00802896	0.0360143	2311	tags=31%, list=17%, signal=26%	Aqp2/Slc1a3/Col16a1/Col1a1/Col5a2/Col6a1/Col1a2/Slc1a2/Col3a1/Egfr/Mmp2/Grin2d/Eno1/Vegfa/Six1/Pdgfra/Klhl22/Tuba1a/Crls1/Sesn2/Castor2/Lmnb1/Sesn3/Lrp11/Ipo5/Lamtor2/Pkd2/Stambpl1/Ngf
GO:0051051	negative regulation of transport	365	-0.317113	-1.30605	0.00802896	0.00802896	0.0360143	2259	tags=27%, list=16%, signal=23%	Ubr3/Abr/Nr1h2/Cyfip1/Frmd4a/Rubcn/Bcr/Lgals3/Npy1r/Pnkd/Ei24/Cabp1/Il1rn/Rab11fip5/Grk2/Pawr/Coro1a/Tnf/Pik3c2a/Htr7/Vamp3/Ankrd13a/Wnk1/Nckap1l/Atp9a/Gnai2/Oaz2/Lgals9/Lypla1/P2ry12/Tgfb1/Sdcbp/Tbc1d4/Gnaq/Rin3/Pid1/Klf7/Inpp5k/Midn/Rgs2/Tnfrsf1b/Hecw2/Abcg2/Tlr2/Foxo1/Ucp2/Inhbb/Plcb4/Stc1/Ace/Gstm7/Pde1c/Notch1/Osm/Dysf/Rhbdf2/Cd74/Pim3/Abca7/Ahr/Ppm1f/Mrln/Mctp1/Spi1/Agrn/Ptgs1/Igfbp3/Sp100/…
GO:1901077	regulation of relaxation of muscle	14	-0.7251	-1.7137	0.00803327	0.00803327	0.0360143	2199	tags=43%, list=16%, signal=36%	Camk2g/Grk2/Pawr/Pde4b/Hrc/Chga
GO:0031570	DNA integrity checkpoint signaling	117	0.399877	1.44251	0.00804101	0.00804101	0.0360143	2570	tags=26%, list=19%, signal=22%	Clspn/Brca1/Rad51/Orc1/Dtl/Ticrr/Rpa2/Blm/Creb3l1/Cdk1/Plk1/E2f1/Donson/Bard1/Cdk5rap3/Brca2/Mdc1/Brsk1/Ier3/Fancd2/Cdc6/Rint1/Cdt1/Atm/Eme1/Chek1/Topbp1/Rad1/Rnaseh2b/Prpf19/Pidd1
GO:0033674	positive regulation of kinase activity	280	-0.338283	-1.34937	0.00809095	0.00809095	0.0362007	2034	tags=25%, list=15%, signal=22%	Ret/Ccny/Tigar/Dipk2a/Ralb/Tlr4/Rapgef2/Il6ra/Tnf/Tlr1/Cd24a/Insr/Sash1/Ptprc/Cd86/Adrb2/Rgcc/Cd40/Fgfr3/Dab2ip/Map2k6/Gprc5b/Pxn/Mertk/Rassf2/Flt4/Fgd2/Fzd4/P2rx7/Irgm2/Tcim/Syk/Pdgfd/Csf1r/Cd74/Tnfrsf11a/Ephb4/Mmd/Epha2/Agrn/Igtp/Atp2b4/Vegfc/Ceacam1/Arhgef5/Il1b/Cd300a/Pik3cg/Kitl/Flt1/Map3k1/Tek/Ccnd1/Stox1/Map3k11/Pdgfb/Tie1/Irgm1/Abi3/Slc11a1/Kit/Card10/Ntf3/Pik3r6/Trem2/Kdr/Efna1/C1qtnf9/S…
GO:0001961	positive regulation of cytokine-mediated signaling pathway	50	-0.501329	-1.5953	0.00815457	0.00815457	0.0364479	2751	tags=44%, list=20%, signal=35%	Edn1/Usp27x/Mavs/Casp1/Mmp12/Casp4/Adam17/Tbk1/Parp9/Crebrf/Trim56/Irgm2/Cd74/Igtp/Laptm5/Trim6/Cxcr4/Irf7/Nlrc5/Parp14/Irgm1/Trem2
GO:0009069	serine family amino acid metabolic process	22	0.642445	1.75376	0.00817559	0.00817559	0.0364671	3422	tags=55%, list=25%, signal=41%	Phgdh/Sdsl/Dhfr/Psat1/Mthfd1/Gcsh/Shmt2/Gart/Gldc/Sephs1/Cdo1/Txnrd1
GO:0030204	chondroitin sulfate metabolic process	22	0.641849	1.75213	0.00817559	0.00817559	0.0364671	2259	tags=59%, list=16%, signal=49%	Chpf/Ugdh/Chsy3/Csgalnact1/Dse/Dsel/Chst12/Slc35b2/Ext1/Chsy1/Chpf2/Arsb/Galns
GO:0051937	catecholamine transport	46	-0.522352	-1.62446	0.00821517	0.00821517	0.0366017	1602	tags=33%, list=12%, signal=29%	P2ry12/Pink1/Cxcl12/Adora2a/Syt15/Sncg/Ptgs1/Syt7/Tgm2/Kcnb1/Entpd1/Prkcb/Agtr2/Rab3b/Chga
GO:0051383	kinetochore organization	20	0.645802	1.70172	0.00822722	0.00822722	0.0366017	2702	tags=60%, list=20%, signal=48%	Cenph/Cenpk/Cenpw/Dlgap5/Ndc80/Smc2/Nuf2/Cenpe/Smc4/Mis12/Kntc1/Cenpx
GO:0051952	regulation of amine transport	60	-0.477283	-1.57487	0.00823097	0.00823097	0.0366017	2116	tags=42%, list=15%, signal=35%	Arl6ip1/Nr3c1/Il1rn/Grk2/Tnf/Dpysl2/P2ry12/Slc12a2/Pink1/Cxcl12/Rgs2/Adora2a/P2rx7/Syt15/Sncg/Ptgs1/Syt7/Slc43a2/Il1b/Kcnb1/Entpd1/Prkcb/Agtr2/Rab3b/Chga
GO:0051797	regulation of hair follicle development	14	0.706584	1.71292	0.00831234	0.00831234	0.0369259	1619	tags=43%, list=12%, signal=38%	Fst/Cdh3/Wnt5a/Inhba/Tgfb2/Smo
GO:0034505	tooth mineralization	17	0.684833	1.74424	0.00833131	0.00833131	0.0369725	1157	tags=47%, list=8%, signal=43%	Enpp1/Col1a1/Aspn/Fgfr1/Hacd1/Nectin1/Fam20a/Wls
GO:0032635	interleukin-6 production	142	-0.39678	-1.47364	0.00843109	0.00843109	0.0373772	2219	tags=35%, list=16%, signal=29%	Zc3h12a/Tmem106a/Lilrb4a/Nlrp10/Trpv4/Tlr7/Grk2/Tlr4/Arhgef2/Il6ra/Tnf/Tlr1/Cd24a/Nckap1l/Lgals9/Il16/Tgfb1/Pou2f2/Plcg2/Nod1/Unc93b1/Il10/Lpl/Ifih1/Hyal2/Tlr2/Ccr5/P2rx7/Il27ra/Syk/Cd74/Ptafr/Aif1/Fcer1g/Nod2/Ptpn6/Tyrobp/Arrb1/Inpp5d/Laptm5/Il1b/Afap1l2/Cd84/Trim30a/Tlr3/Nos2/Cd36/Cd200/Trem2
GO:0032970	regulation of actin filament-based process	333	-0.323562	-1.31579	0.00848303	0.00848303	0.0375693	2214	tags=24%, list=16%, signal=21%	Arpc3/Cyfip1/Whamm/Rhog/Taok1/Ep300/Tmod3/Nck2/Bbs4/Evl/Prex1/Coro1a/Coro1b/Tmsb4x/Wasf2/Nckap1l/Kank1/Id1/Sptan1/Vasp/Nck1/Tgfb1/Pde4b/Fhod1/Sorbs3/Tmod1/Synpo2/Rgcc/Inpp5k/Cd2ap/Rhpn2/Celsr1/Ssh2/Csf3/Tlr2/Bst2/Myo1f/Pxn/Sptbn1/Taok2/Daam2/Gja1/Plek/Cdc42ep1/Stc1/Cdc42ep3/Gmfg/Gpr65/Nrp1/Cacna1h/Hip1r/Kcnj2/Csf1r/Tjp1/Ppm1f/Cdc42ep2/Rnd1/Bst1/Arhgef5/Mef2c/Jup/Mtss1/S1pr1/Map3k1/Pecam1/Rapgef3/…
GO:0098698	postsynaptic specialization assembly	26	0.603383	1.69958	0.00852269	0.00852269	0.0377066	1221	tags=31%, list=9%, signal=28%	C1ql3/Abi3bp/Wnt5a/Ptprs/Lrfn1/Dock7/Lrfn4/Nrxn2
GO:0060907	positive regulation of macrophage cytokine production	26	-0.607663	-1.69165	0.00856161	0.00856161	0.0378404	2369	tags=58%, list=17%, signal=48%	Casp1/Casp4/Tlr7/Tlr4/Plcg2/Nod1/Gprc5b/Tlr2/Sema7a/P2rx7/Cd74/Nod2/Laptm5/Tlr3/Cd36
GO:0007204	positive regulation of cytosolic calcium ion concentration	116	-0.408056	-1.46415	0.00857193	0.00857193	0.0378476	1575	tags=27%, list=11%, signal=24%	Ccl3/Plcg2/Bmp4/P2ry2/Ackr3/Gata2/Ccrl2/C5ar1/Jak3/Gja1/Cd52/Ccr5/P2rx7/Ric3/Itpr3/Il1b/Pik3cg/Cxcr4/C3ar1/Cx3cr1/Ccr2/Cd36/Cav1/Gimap5/Kdr/Ednrb/Cd38/Trpc3/Calcr/Ccr7/Akap5
GO:0071360	cellular response to exogenous dsRNA	12	-0.732041	-1.68851	0.00859429	0.00859429	0.0379079	2609	tags=50%, list=19%, signal=41%	Zc3hav1/Mavs/Ralb/Ifih1/Tlr3/Cav1
GO:1901224	positive regulation of non-canonical NF-kappaB signal transduction	55	-0.492104	-1.58636	0.00864378	0.00864378	0.038078	2439	tags=47%, list=18%, signal=39%	Terf2ip/Rbck1/Ddx3x/Rc3h1/Eif2ak2/Pdcd4/Tlr7/Tlr4/Tnf/Sash1/Nlrp3/Cd86/Nod1/Ago1/Actn4/Tlr2/Nmi/Trim56/Tcim/Ifi35/Nod2/Laptm5/Il1b/Tlr3/Ptp4a3/Trem2
GO:0009410	response to xenobiotic stimulus	200	-0.356529	-1.38859	0.00865034	0.00865034	0.038078	1582	tags=20%, list=11%, signal=18%	Myo6/Pde4b/Lipa/Hdac5/Mylk/Smad1/Bloc1s6/Dmd/Gstm1/P2rx7/Gstm7/Ptprm/Rb1/Ahr/Ppm1f/Apobec1/Abcb1b/Il1b/Mef2c/Cyp2d22/Fmo1/Aox1/Prkcb/Igf2/Ppp1r14a/Nos2/Kcnq1/Slc12a5/Aim2/Cybb/Kdr/C130074G19Rik/Slc1a1/Cd38/Sult1a1/Fmo2/Akap5/Abcc9/Kcnj8
GO:0055074	calcium ion homeostasis	235	-0.346971	-1.367	0.00877931	0.00877931	0.0386068	2015	tags=25%, list=15%, signal=21%	Tcirg1/Trim24/Trpv4/Vps54/Cxcl10/Plcg1/Coro1a/Mcoln1/Tmem178/Anxa7/Grina/Tgfb1/Ptprc/Plcg2/P2ry2/Cd40/Fgfr3/Dmd/Cln3/Tmtc2/Slc24a5/Plcb4/Ccr5/P2rx7/Stc1/Gstm7/Cdh23/Ccl8/Slc8b1/Pik3cb/Atp13a2/Itpr3/Ptpn6/Atp2b4/Chd7/Lyn/Cngb1/Plcb1/Tgm2/Inpp4b/Slc30a1/Cav2/Prkcb/Apoe/Ccr2/Cav1/Alpl/F2rl3/Atp2a3/Cdh5/Hrc/Kdr/Clec4b1/Aplnr/Edn3/Trpc3/Chga/Casq2
GO:0060420	regulation of heart growth	70	0.464742	1.56575	0.00882496	0.00882496	0.0387402	746	tags=20%, list=5%, signal=19%	Rbp4/Nrg1/Ccn4/Col14a1/Zfpm2/Kcnk2/Fdps/Bmpr1a/Ncam1/Fgfr1/Igf1/Fgf2/Cdk1/Pak1
GO:0045778	positive regulation of ossification	50	0.51516	1.64729	0.00882742	0.00882742	0.0387402	1297	tags=32%, list=9%, signal=29%	Vdr/Osr1/Fbn2/Bmpr1b/Tmem119/Scube2/Wnt5a/Pkdcc/Tent5a/Ptn/Bmpr1a/Slc8a1/Osr2/Gpm6b/Mia3/Runx2
GO:0043200	response to amino acid	76	0.440799	1.50497	0.00900198	0.00900198	0.0394665	2916	tags=38%, list=21%, signal=30%	Slc1a3/Col16a1/Col1a1/Col5a2/Col6a1/Col1a2/Slc1a2/Col3a1/Egfr/Mmp2/Grin2d/Six1/Pdgfra/Klhl22/Tuba1a/Crls1/Sesn2/Castor2/Lmnb1/Sesn3/Ipo5/Lamtor2/Stambpl1/Cebpb/Dnmt1/Lamtor4/Pdgfc/Cpeb1/Glra1
GO:0043567	regulation of insulin-like growth factor receptor signaling pathway	18	0.666966	1.71665	0.00904885	0.00904885	0.0396321	731	tags=33%, list=5%, signal=32%	Igfbp2/Cdh3/Cilp/Igfbp6/Igf1/Igfbp4
GO:1905153	regulation of membrane invagination	19	-0.654518	-1.69348	0.00907589	0.00907589	0.0397106	1711	tags=58%, list=12%, signal=51%	Nckap1l/Plcg2/Stap1/Gata2/Abca7/Pparg/Cd300a/Itga2/Cd36/Fcgr1/Trem2
GO:0044406	adhesion of symbiont to host	10	-0.771151	-1.69356	0.00912766	0.00912766	0.0398971	1042	tags=70%, list=8%, signal=65%	Nectin2/Gbp2/Gbp3/Gbp7/Scarb1/Gbp9/Gbp6
GO:0002673	regulation of acute inflammatory response	39	-0.539853	-1.60948	0.00913741	0.00913741	0.0398997	2041	tags=59%, list=15%, signal=50%	Adam8/H2-T22/Tnf/Nlrp3/Alox5ap/Il20rb/Ccr5/H2-K1/H2-D1/Tnfrsf11a/Fcgr3/Fcer1g/Pparg/Il1b/Pik3cg/Fcgr2b/H2-Q4/H2-Q7/Fcgr1/H2-Q6/H2-T23/Ednrb/Ccr7
GO:0016264	gap junction assembly	11	-0.738319	-1.67025	0.00918001	0.00918001	0.0400456	1571	tags=64%, list=11%, signal=56%	Ctnna1/Ace/Il1b/Cav1/Gja5/Aplnr/Hopx
GO:0045669	positive regulation of osteoblast differentiation	65	0.46596	1.55105	0.00930456	0.00930456	0.0405483	974	tags=22%, list=7%, signal=20%	Sfrp2/Cthrc1/Ccn4/Fbn2/Bmpr1b/Tmem119/Scube2/Tent5a/Bmpr1a/Fzd1/Igf1/Fgf2/Gli3/Vegfa
GO:0032729	positive regulation of type II interferon production	57	-0.473736	-1.53417	0.00934133	0.00934133	0.0406679	2171	tags=40%, list=16%, signal=34%	Tyk2/Jak2/Sash3/Tlr7/Tlr4/Tnf/Nras/Cd27/Pde4b/Zfpm1/H2-K1/Cd14/Il27ra/H2-D1/Irf8/Isg15/Il1b/H2-Q4/Tlr3/H2-Q7/Ccr2/Slc11a1/H2-Q6
GO:0006090	pyruvate metabolic process	104	0.416441	1.47732	0.00936358	0.00936358	0.0406834	2450	tags=29%, list=18%, signal=24%	Slc16a3/Nupr1/Enpp1/Col6a1/Hk2/Me1/Igf1/Tpi1/Pdk3/Galk1/Pgk1/Pgam1/Eno1/Slc4a4/Gale/Pcx/Slc16a1/Adpgk/Pkm/Ier3/Aldoa/Eno2/Eno1b/Ldha/Gapdh/Myc/Mpc2/Mpc1/Pdk1/Hif1a
GO:0034502	protein localization to chromosome	104	0.415925	1.47549	0.00936358	0.00936358	0.0406834	4024	tags=48%, list=29%, signal=34%	Mcm8/Knl1/Ttk/Tonsl/Esco2/Spdl1/Rpa2/Mms22l/Cdk1/Cenpq/Ezh2/Aurkb/Plk1/Zwilch/Brca2/Mdc1/Carm1/Tert/Parp3/Gnl3/Spidr/Rpa1/Topbp1/Scml2/Aplf/Vrk1/Slf1/Haspin/Kntc1/Tinf2/Wrap53/Cct3/Bub1b/Cct8/Cct7/Vcp/Tex15/Tcp1/Brd3/Msh2/Parp1/Htatsf1/Rnf4/Mtbp/Pinx1/Mcm9/Cct6a/Smc5/Cct2/Tnks
GO:0080135	regulation of cellular response to stress	480	0.293254	1.23791	0.00947237	0.00947237	0.0411151	2079	tags=18%, list=15%, signal=16%	Usp51/Nrg1/Twist1/Inava/Ddah1/Brca1/Usp13/Nupr1/Eya4/Thy1/Aunip/Ptgs2/Rad51/Ptn/Kcnk2/Ptprs/Manf/Parpbp/Prrx1/Rpa2/Neo1/Pbk/Lrp1/Mif/Blm/Creb3l1/Igfbp6/Egfr/Selenos/Steap3/Npas2/Dhfr/Ddias/Eya2/Nol3/Atad5/Ptprf/Eno1/Hgf/Cd44/Bcl7c/Dusp10/Cdkn2a/Spire1/Mid1/Tgfb2/Bard1/Pdia6/Sf3b5/Hyou1/Taf5/Smarcc1/Erp29/Brca2/Usp1/Helb/Pcbp4/Dpf1/Ier3/Rad51ap1/Tmed2/Npm1/Eno1b/Snai1/Parp3/Zfp385a/Creb3/Pcna/Foxm…
GO:0031589	cell-substrate adhesion	304	0.328577	1.33663	0.00951601	0.00951601	0.0412634	1332	tags=20%, list=10%, signal=19%	Sfrp1/Col8a1/Itgbl1/Smoc1/Ccdc80/Efemp2/Serpine1/Thbs1/Ephb3/Epha3/Cdh11/Abi3bp/Zfp469/Tyro3/Lgals1/Itga11/Col16a1/Has2/Tnn/Thy1/Col1a1/Mdk/Fn1/Postn/Smoc2/Fbln1/Pcsk5/Kif14/Col3a1/Emilin1/Ptn/Ccn2/Col5a3/Tiam1/Frem1/Pdpn/Cd63/Angpt1/Lrp1/Tnfrsf12a/Dbn1/Itgb5/Hacd1/P4hb/Epdr1/Rac3/Csf1/Antxr1/Spp1/Vegfa/Itgav/Tesk2/Cspg5/Nexmif/Axl/Gpm6b/Cdkn2a/Apod/Egfl6/Fbln2/Fndc3b/Carmil1
GO:0072676	lymphocyte migration	84	-0.440588	-1.5216	0.00955602	0.00955602	0.0412671	2174	tags=40%, list=16%, signal=34%	Gpr183/Dock8/Adam17/Adam8/Plec/Myo1g/Msn/Cxcl10/Coro1a/Wnk1/Lgals9/Ccl12/Ccl3/Slc12a2/Cxcl12/Adam10/Il27ra/Ccl9/Ccl8/Slc8b1/Aif1/Lrch1/Spns2/Stk10/S1pr1/Itga4/Ccr2/Jam2/Ch25h/Cd200/F11r/Msmp/Ccl6/Ccr7
GO:0006720	isoprenoid metabolic process	59	0.483096	1.5742	0.00955708	0.00955708	0.0412671	2522	tags=39%, list=18%, signal=32%	Rbp4/Aldh1a3/Aldh1a2/Rbp1/Crabp2/Cyp1b1/Fdps/Aldh1a1/Mvd/Phyh/Idi1/Lss/Dhrs4/Pecr/Amacr/Rarres2/Mvk/Hmgcr/Hmgcs1/Prmt3/Coq2/Alg2/Pmvk
GO:0071320	cellular response to cAMP	28	-0.593065	-1.66778	0.00957039	0.00957039	0.0412671	1845	tags=39%, list=13%, signal=34%	Rapgef2/Igfbp5/Inpp5k/Rapgef1/Ahr/Itpr3/Pik3cg/Rapgef3/Pde2a/Kcnq1/Aqp1
GO:0032700	negative regulation of interleukin-17 production	13	-0.706694	-1.66462	0.0095745	0.0095745	0.0412671	1887	tags=54%, list=14%, signal=47%	Tlr4/Nckap1l/Tusc2/Tgfb1/Tlr2/Il27ra/Vsir
GO:0051965	positive regulation of synapse assembly	48	0.517046	1.64709	0.00957708	0.00957708	0.0412671	2135	tags=33%, list=16%, signal=28%	Slit2/Srpx2/Ephb2/Ephb3/Thbs2/Prkca/Tpbg/Adgrl1/Bhlhb9/St8sia2/Dlg4/Adgrb2/Amigo3/Flrt3/Flrt2/Nlgn2
GO:0042303	molting cycle	94	0.428359	1.51158	0.00958313	0.00958313	0.0412671	1625	tags=24%, list=12%, signal=22%	Fst/Cdh3/Fgf7/Barx2/Runx1/Wnt5a/Col6a1/Ptgs2/Inhba/Alx4/Egfr/Tsku/Fzd3/Lrig1/Sox9/Tgfb2/Farp2/Gli2/Ext1/Tert/Apcdd1/Smo/Snai1
GO:0042633	hair cycle	94	0.428359	1.51158	0.00958313	0.00958313	0.0412671	1625	tags=24%, list=12%, signal=22%	Fst/Cdh3/Fgf7/Barx2/Runx1/Wnt5a/Col6a1/Ptgs2/Inhba/Alx4/Egfr/Tsku/Fzd3/Lrig1/Sox9/Tgfb2/Farp2/Gli2/Ext1/Tert/Apcdd1/Smo/Snai1
GO:0110053	regulation of actin filament organization	237	-0.340427	-1.34308	0.0096023	0.0096023	0.0413088	2214	tags=24%, list=16%, signal=21%	Arpc3/Cyfip1/Whamm/Tmod3/Nck2/Bbs4/Evl/Prex1/Coro1a/Coro1b/Tmsb4x/Wasf2/Nckap1l/Kank1/Id1/Sptan1/Vasp/Nck1/Fhod1/Sorbs3/Tmod1/Synpo2/Rgcc/Inpp5k/Rhpn2/Ssh2/Csf3/Tlr2/Pxn/Sptbn1/Daam2/Gja1/Plek/Cdc42ep1/Cdc42ep3/Gmfg/Gpr65/Nrp1/Hip1r/Tjp1/Ppm1f/Cdc42ep2/Arhgef5/Mtss1/S1pr1/Map3k1/Pecam1/Rapgef3/Kank3/Arhgap18/Lmod1/Shank3/Limch1/Esam/Arhgef15/Hcls1/F11r/Was
GO:0019471	4-hydroxyproline metabolic process	10	0.768061	1.69293	0.00961732	0.00961732	0.0413326	1505	tags=60%, list=11%, signal=53%	P4ha3/P4ha2/P4ha1/P4hb/Egln3/Prdx4
GO:1901659	glycosyl compound biosynthetic process	18	0.662466	1.70507	0.00967832	0.00967832	0.0415538	2277	tags=44%, list=17%, signal=37%	Ak1/Dnph1/Tk1/Adk/Dtymk/Ada/Mtap/Dctd
GO:0046638	positive regulation of alpha-beta T cell differentiation	44	-0.521834	-1.6132	0.00976798	0.00976798	0.0418975	2180	tags=36%, list=16%, signal=31%	Lilrb4a/Runx3/Sash3/Nckap1l/Nlrp3/Irf1/Cd83/Nfkbid/Syk/Itpkb/Hlx/Il2rg/Ccr2/Gimap5/Zbtb16/Ccr7
GO:0099174	regulation of presynapse organization	18	0.662291	1.70462	0.00983568	0.00983568	0.0421464	2399	tags=44%, list=17%, signal=37%	Nrg1/Mdga1/Fzd1/Lrfn4/Farp1/Gpc4/Nlgn2/Lrfn3
GO:0090287	regulation of cellular response to growth factor stimulus	263	0.338489	1.35039	0.0100372	0.0100372	0.0429676	974	tags=16%, list=7%, signal=15%	Grem2/Slit2/Sfrp1/Fst/Lox/Sfrp2/Cdh3/Dok5/Cilp/Fbn2/Thbs1/Cdkn2b/Vegfd/Bmper/Fbn1/Tnfaip6/Vasn/Ccbe1/Adamtsl2/Wnt5a/Tgfb3/Smoc2/Aspn/Emilin1/Fstl1/Cd63/Angpt1/Neo1/Lrp1/Fzd1/Creb3l1/Fgfr1/Dcn/Pmepa1/Fgf2/Sulf2/Fgfrl1/Sulf1/Robo1/Ptprf/Hspa5/Tmem53/Vegfa
GO:0097094	craniofacial suture morphogenesis	14	0.699039	1.69463	0.0101096	0.0101096	0.0432296	1744	tags=50%, list=13%, signal=44%	Twist1/Frem1/Gli3/Rab23/Tmem107/Mmp16/Mmp14
GO:0086011	membrane repolarization during action potential	10	-0.767084	-1.68463	0.0101182	0.0101182	0.0432296	872	tags=50%, list=6%, signal=47%	Kcnj2/Kcnq1/Cav1/Kcna5/Kcnj8
GO:0007416	synapse assembly	148	0.383557	1.43295	0.0102696	0.0102696	0.0438333	1410	tags=24%, list=10%, signal=22%	Slit2/Nrg1/Srpx2/C1ql3/Ephb2/Ephb3/Abi3bp/Thbs2/Wnt5a/Mdga1/Prkca/Cacna1a/Tpbg/Ptprs/Lrfn1/Dock7/Numbl/Fzd1/Magi2/Robo1/Fzd5/Lrfn4/Gabra3/Gabre/Adgrl1/Bhlhb9/Ptpn13/Six1/Nectin1/St8sia2/Nrxn2/Plxnb2/Dlg4/Sdk1/Farp1/Cdh2
GO:0014909	smooth muscle cell migration	110	0.407559	1.46169	0.010296	0.010296	0.0439031	2165	tags=35%, list=16%, signal=29%	Slit2/Drd4/Ccn4/Serpine1/Tafa5/F3/Ccn3/Has2/Enpp1/Ndrg4/Cyp1b1/Mdk/Postn/Fat1/Pcsk5/Lpar1/Bmpr1a/Dock7/Lrp1/Igf1/S1pr2/Pak1/Tpm1/Tert/Plat/Src/Nox4/Smo/Ddr2/Apex1/Grb10/Rps6kb1/Dock5/S100a11/Myc/Parva/Gstp1/Adipoq
GO:1903317	regulation of protein maturation	56	0.489788	1.59225	0.0103384	0.0103384	0.0439961	1744	tags=30%, list=13%, signal=27%	Tfr2/Nkd2/Serpine1/Thbs1/Spon1/Ccbe1/Bag2/Nol3/Eno1/Gsn/Serpine2/Gas1/Timm23/Plat/Src/Eno1b/Mmp14
GO:0030335	positive regulation of cell migration	495	-0.297542	-1.25771	0.0103466	0.0103466	0.0439961	2150	tags=29%, list=16%, signal=26%	Jak2/Tgfbr3/Hdac7/Lgals3/Apc/Dock8/Akt3/Numb/Adam17/Casp8/Adam8/Ret/Trpv4/Mgat5/Cxcl10/Pawr/Plcg1/Tlr4/Prex1/Sema4d/Arhgef2/Coro1a/Akirin1/Rapgef2/Tmsb4x/Pik3c2a/Sp1/Wnk1/Insr/Nckap1l/Bmp2/Gnai2/Igfbp5/Enpp2/Lgals9/Sash1/Ccl12/P2ry12/Tgfb1/Mospd2/Sdcbp/Ptprc/Plcg2/Bmp4/Synpo2/Rreb1/P2ry2/Cxcl12/Actn4/Ackr3/Mylk/Cd40/Dapk2/P2ry6/Atoh8/Dab2ip/Sele/Hspb1/Sema4c/Ssh2/Fermt3/Gata2/Jcad/Ripor1/Tlr2/Myo…
GO:0002730	regulation of dendritic cell cytokine production	15	-0.689264	-1.66848	0.0103545	0.0103545	0.0439961	1887	tags=60%, list=14%, signal=52%	Mavs/Tlr4/Plcg2/Tlr2/Bst2/Jak3/Nod2/Tlr3/Kit
GO:0050688	regulation of defense response to virus	55	-0.485313	-1.56447	0.0103582	0.0103582	0.0439961	1531	tags=24%, list=11%, signal=21%	Apobec3/Cd37/Parp9/Stat1/Il15/Irgm2/Dtx3l/Igtp/Il1b/Trim6/Irgm1/Aim2/Gbp4
GO:1901381	positive regulation of potassium ion transmembrane transport	19	-0.651729	-1.68626	0.010483	0.010483	0.0444827	1735	tags=42%, list=13%, signal=37%	Wnk1/Atp1b3/Kcnj2/Kcnq1/Atp1b2/Trem2/Lrrc55/Edn3
GO:0030036	actin cytoskeleton organization	593	-0.292724	-1.25395	0.0105589	0.0105589	0.0447611	2260	tags=24%, list=16%, signal=21%	Phactr4/Abr/Iqsec1/Casp4/Arpc3/Cyfip1/Cflar/Whamm/Rhog/Bcr/Mob2/Taok1/Ep300/Tmod3/Epb41/Neurl2/Nck2/Plec/Myo1g/Bbs4/Evl/Ppp1r9b/Ophn1/Fam171a1/Trpv4/Pawr/Prex1/Arhgef2/Coro1a/Coro1b/Pdlim1/Cdc42bpb/Tnf/Tmsb4x/Alkbh4/Wasf2/Nckap1l/Kank1/Id1/Sptan1/Vasp/Nck1/Diaph2/Myo6/Tgfb1/Iqsec3/Hmcn1/Fhod1/Sorbs3/Tmod1/Synpo2/Micall2/Rgcc/Inpp5k/Mink1/Cd2ap/Rhpn2/Actn4/Mef2a/Celsr1/Tnfaip1/Sorbs1/Ssh2/Bloc1s6/…
GO:0006334	nucleosome assembly	45	0.504279	1.59184	0.0106228	0.0106228	0.0449885	1981	tags=27%, list=14%, signal=23%	Asf1b/Chaf1a/Chaf1b/Sox9/Nasp/Dnajc9/Pole3/Hat1/Mcm2/Nap1l1/Npm1/Spty2d1
GO:0033077	T cell differentiation in thymus	80	-0.426315	-1.45823	0.0106441	0.0106441	0.0450348	3018	tags=38%, list=22%, signal=29%	Il1a/Zfp609/Card11/Bcl2/Ifnar2/Gata3/Xrcc4/Stat5b/Sos1/Zfp608/Apc/Adam17/Adam8/Sos2/Cdk6/Ptprc/Bmp4/Mink1/Ctnnb1/H2-DMa/Nfkbid/Dock2/B2m/Cd74/Itpkb/Il7r/Jag2/Il1b/Il2rg/Ccr7
GO:0045785	positive regulation of cell adhesion	409	-0.316063	-1.31157	0.0107097	0.0107097	0.0452685	2381	tags=31%, list=17%, signal=26%	Il2ra/Ptk2/Rhoh/Gata3/Myadm/Lck/Rras/Dab2/Lamb2/Pld2/Stat5b/H2-Ob/Lilrb4a/Tyk2/Jak2/Runx3/Apc/Dock8/Cd59a/Sash3/Piezo1/Adam8/Ret/Nck2/Dusp26/Efnb1/H2-T22/Pawr/Prex1/Coro1a/Il6ra/Tnf/Cd24a/H2-Eb1/Nckap1l/Cdk6/Cd27/Enpp2/Lgals9/Nck1/P2ry12/Nlrp3/Tgfb1/Zmiz1/Ptprc/Triobp/Cd86/Rreb1/Cxcl12/Myo10/H2-DMa/Sele/Dmd/Irf1/Utrn/Il4i1/Jak3/Magi1/Ccr5/Efnb2/Cd83/Nfkbid/H2-K1/Dennd6a/H2-Aa/Il15/Nrp1/Itgb2/Syk/…
GO:2001214	positive regulation of vasculogenesis	11	-0.733809	-1.66005	0.0107456	0.0107456	0.0453546	3088	tags=82%, list=22%, signal=64%	Rin2/Tmem100/Rap1a/Rras/Rapgef2/Ceacam1/Cd34/Ramp2/Kdr
GO:0007420	brain development	487	0.297595	1.25746	0.0107519	0.0107519	0.0453546	1626	tags=18%, list=12%, signal=17%	Mgarp/Slit2/Ptger3/Sfrp1/Nrg1/Sfrp2/Aldh1a3/Aldh1a2/Lmx1b/Ephb2/Emx2/Ephb3/Dclk1/Meis3/Tyro3/Stil/En1/Pitx1/Mdk/Wnt5a/Mdga1/Meis2/Cacna1a/Slc1a2/B4galt2/Sphk1/Kif14/Inhba/Col3a1/Tubb2b/Aspm/Ccdc134/Bmpr1a/Ptprs/Nr2f1/Dock7/Ncam1/Numbl/Fgfr1/Egfr/Igf1/Smarca1/Fgf2/Robo1/Pak1/Pcdh18/Tsku/Tacc3/Gli3/Rac3/Fzd3/Hspa5/Nfix/Ezh2/Ugp2/Sema5a/Myh10/Gbx2/Serpine2/Egr2/E2f1/Tubb2a/Vax2/Unc5c/Axl/Ryk/Wls/Atf…
GO:0033003	regulation of mast cell activation	19	-0.64995	-1.68166	0.0107644	0.0107644	0.0453546	2358	tags=47%, list=17%, signal=39%	Crlf2/Lilrb4a/Ptpre/Enpp3/Nectin2/Ptpn6/Lyn/Cd300a/Cd84
GO:0050856	regulation of T cell receptor signaling pathway	39	-0.533521	-1.5906	0.0107717	0.0107717	0.0453546	3399	tags=62%, list=25%, signal=46%	Rela/Malt1/Prnp/Ptpn22/Card11/Cd81/Lck/Rc3h1/Lilrb4a/Lgals3/Usp12/Pawr/Ubash3a/Lipa/Dgkz/Elf1/Nectin2/Dusp22/Dusp3/Prkd2/Ptpn6/Laptm5/Cd300a/Ccr7
GO:0051497	negative regulation of stress fiber assembly	30	-0.58072	-1.65273	0.0108076	0.0108076	0.0454616	1719	tags=27%, list=12%, signal=23%	Wasf2/Inpp5k/Rhpn2/Tjp1/S1pr1/Kank3/F11r/Was
GO:0016051	carbohydrate biosynthetic process	161	0.375937	1.41242	0.0108366	0.0108366	0.0455398	2713	tags=34%, list=20%, signal=27%	Rbp4/Has1/Nnmt/Has2/Pth1r/Enpp1/C1qtnf3/C1qtnf2/Igf1/Tpi1/Chst10/Pgk1/Csgalnact1/Serpina12/Pask/Pgam1/Pgm1/Gsto1/Ugp2/Eno1/Slc39a14/Gfpt1/Nans/Pgp/Gys1/Pcx/Hs2st1/Chst12/Slc25a10/C1qtnf12/Ext1/Irs1/Irs2/B3galnt1/Eno2/Sesn2/Per2/Grb10/Gapdh/Supt20/Gpt2/Adipoq/Akt2/Ptpn2/Ddb1/Nfkb1/Hif1a/St6galnac6/Erfe/B3galt1/Slc35b4/Pgd/Mgat2/G6pc3
GO:0097006	regulation of plasma lipoprotein particle levels	48	-0.514125	-1.6162	0.0108671	0.0108671	0.045624	1494	tags=33%, list=11%, signal=30%	Lipa/Plagl2/Lpl/Mylip/Msr1/Abca7/Pla2g7/Apoe/Abcg1/Abca1/Apoc2/Gpihbp1/Cd36/Pltp/Trem2/Scarb1
GO:0002040	sprouting angiogenesis	114	-0.400329	-1.43677	0.0108913	0.0108913	0.0456817	1567	tags=32%, list=11%, signal=29%	Tgfb1/Hdac5/Bmp4/Il10/Smad1/Gata2/Jcad/Flt4/Efnb2/Glul/Nrp1/Notch1/Tjp1/Pik3cb/Ephb4/Rnf213/Epn2/Epha2/Sh2b3/Vegfc/Ceacam1/Adamts9/Clec14a/Sema6a/Flt1/Ramp2/Tek/Dll1/Hdac9/Ppp1r16b/Card10/Cdh13/Mmrn2/Kdr/Dll4/Aplnr/Nrarp
GO:0060351	cartilage development involved in endochondral bone morphogenesis	31	0.575581	1.68833	0.0109101	0.0109101	0.0457164	1531	tags=35%, list=11%, signal=32%	Comp/Thbs1/Scube2/Shox2/Col27a1/Col1a1/Thbs3/Sox9/Serpinh1/Ext1/Carm1
GO:0043405	regulation of MAP kinase activity	144	-0.385658	-1.43361	0.0109688	0.0109688	0.045918	1887	tags=30%, list=14%, signal=26%	Tlr4/Tnf/Cd24a/Insr/Bmp2/Dusp7/Sash1/Ptprc/Inpp5k/Rgs2/Cd40/Dab2ip/Map2k6/Hyal2/Fgd2/Fzd4/P2rx7/Syk/Pdgfd/Tnxb/Tnfrsf11a/Ptpn6/Trib2/Ceacam1/Lyn/Arhgef5/Pparg/Il1b/Spry4/Cd300a/Pik3cg/Kitl/Flt1/Map3k1/Apoe/Map3k11/Pdgfb/Cav1/Kit/Ntf3/Pik3r6/Edn3/Ccr7
GO:0032727	positive regulation of interferon-alpha production	23	-0.623562	-1.66264	0.0110143	0.0110143	0.0460642	2909	tags=61%, list=21%, signal=48%	Ptpn22/Zc3hav1/Mavs/Traf3ip3/Nmb/Mmp12/Ddx3x/Tbk1/Tlr7/Tlr4/Ifih1/Stat1/Irf7/Tlr3
GO:0032271	regulation of protein polymerization	170	-0.363724	-1.38245	0.0110248	0.0110248	0.0460644	2715	tags=29%, list=20%, signal=24%	Rdx/Gba2/Twf2/Icam1/Flii/Met/Nckap1/Map2/Myadm/Fes/Camsap2/Arpc3/Cyfip1/Apc/Tmod3/Nck2/Bbs4/Evl/Prex1/Coro1a/Tmsb4x/Nckap1l/Kank1/Sptan1/Vasp/Nck1/Tmod1/Git1/Ssh2/Csf3/Tlr2/Sptbn1/Daam2/Cdc42ep1/Cdc42ep3/Hip1r/Arhgef7/Cdc42ep2/Stmn2/Tppp/Map3k1/Pecam1/Kank3/Arhgap18/Lmod1/Cav1/Esam/Hcls1/Cdh5/Gda
GO:0007189	adenylate cyclase-activating G protein-coupled receptor signaling pathway	81	-0.445046	-1.52155	0.0110629	0.0110629	0.0461789	1951	tags=37%, list=14%, signal=32%	Adcy9/Cxcl10/Grk2/Rapgef2/Htr7/Gnai2/Gnaq/Pde4b/Adrb2/Adgre5/Adora2a/Gpr65/Grk5/Adgrl2/Calcrl/Rapgef4/Atp2b4/Adcy4/Adgre1/Adgrl4/Adgrf5/Ramp2/S1pr1/Abca1/Adgrg1/Gpr4/S1pr4/Ramp3/Calcr/Chga
GO:0002327	immature B cell differentiation	14	-0.715188	-1.69028	0.0111286	0.0111286	0.0464088	848	tags=43%, list=6%, signal=40%	Cd24a/Atp11c/Spi1/Laptm5/Kit/Ighm
GO:0065004	protein-DNA complex assembly	145	0.372615	1.38741	0.0111436	0.0111436	0.0464169	3432	tags=32%, list=25%, signal=25%	Cenph/Asf1b/Cenpk/Rad51/Cenpn/Cdc45/Cenpw/Chaf1a/Chaf1b/Cenpi/Sox9/Dlgap5/Nasp/Dnajc9/Pole3/Cenpe/Hat1/Hjurp/Taf5/Oip5/Mcm2/Nap1l1/Npm1/Cand1/Cenpp/Med9/Spty2d1/Cdt1/Mis12/Itgb3bp/Taf12/Anp32b/Gtf2h5/Kntc1/Cenpv/Ssrp1/Cenpx/Cenpo/Taf10/Med26/Med14/Gtf2b/Smarca5/Taf6l/Med29/Cenpc1/Med25
GO:0019229	regulation of vasoconstriction	64	-0.457111	-1.5149	0.0111728	0.0111728	0.0464169	1384	tags=30%, list=10%, signal=27%	Apln/Itga9/Gja1/Ace/Dock4/Ahr/Mgll/Ptgs1/Itga4/Pdgfb/Cysltr1/Cav1/Kcna5/Gja5/Cd38/Edn3/Tbxas1/Atp1a2/Chga
GO:0009306	protein secretion	310	-0.324373	-1.31041	0.0111731	0.0111731	0.0464169	2015	tags=24%, list=15%, signal=21%	Tcirg1/Rab11b/Slc4a8/Il1rn/Rab11fip5/Rab8b/Tlr4/Rab27a/Stxbp5/Tnf/Nagpa/Anxa7/Psap/Slc25a22/Tgfb1/Slc12a2/Gnaq/Klf7/Midn/Cd2ap/Bloc1s6/Lrp5/Tlr2/Foxo1/Ucp2/Adora2a/Hmga1/Inhbb/Gja1/Plek/Orai1/P2rx7/Glul/Pde1c/Rhbdf2/Pim3/Slc8b1/Atp13a2/Myo18a/Sncg/Rapgef4/Arrb1/Syt7/Vegfc/Sybu/Rph3al/Pparg/Acvr2b/Il1b/Cavin1/Plcb1/Lepr/Kcnb1/Prkcb/Apoe/Abcg1/Abca1/Unc13b/Nos2/Kcnq1/Pde8b/Rab3b/Cd200/Trem2/Pcsk1/E…
GO:0035592	establishment of protein localization to extracellular region	310	-0.324373	-1.31041	0.0111731	0.0111731	0.0464169	2015	tags=24%, list=15%, signal=21%	Tcirg1/Rab11b/Slc4a8/Il1rn/Rab11fip5/Rab8b/Tlr4/Rab27a/Stxbp5/Tnf/Nagpa/Anxa7/Psap/Slc25a22/Tgfb1/Slc12a2/Gnaq/Klf7/Midn/Cd2ap/Bloc1s6/Lrp5/Tlr2/Foxo1/Ucp2/Adora2a/Hmga1/Inhbb/Gja1/Plek/Orai1/P2rx7/Glul/Pde1c/Rhbdf2/Pim3/Slc8b1/Atp13a2/Myo18a/Sncg/Rapgef4/Arrb1/Syt7/Vegfc/Sybu/Rph3al/Pparg/Acvr2b/Il1b/Cavin1/Plcb1/Lepr/Kcnb1/Prkcb/Apoe/Abcg1/Abca1/Unc13b/Nos2/Kcnq1/Pde8b/Rab3b/Cd200/Trem2/Pcsk1/E…
GO:0051591	response to cAMP	41	-0.522964	-1.57868	0.0111874	0.0111874	0.0464318	1845	tags=39%, list=13%, signal=34%	Rap1a/Dgkq/Itpr1/Rapgef2/Igfbp5/Inpp5k/Rapgef1/Hmga1/Crem/Ahr/Itpr3/Pik3cg/Rapgef3/Pde2a/Kcnq1/Aqp1
GO:0055023	positive regulation of cardiac muscle tissue growth	39	0.536549	1.64692	0.0112174	0.0112174	0.0465123	693	tags=26%, list=5%, signal=24%	Nrg1/Ccn4/Zfpm2/Fdps/Bmpr1a/Ncam1/Fgfr1/Igf1/Fgf2/Cdk1
GO:0009226	nucleotide-sugar biosynthetic process	16	0.690269	1.73166	0.0112485	0.0112485	0.046567	1740	tags=56%, list=13%, signal=49%	Gmppb/Pmm1/Pgm3/Ugdh/Gmds/Gnpnat1/Gfpt1/Uxs1/Uap1
GO:0006613	cotranslational protein targeting to membrane	18	0.654992	1.68583	0.011252	0.011252	0.046567	3067	tags=67%, list=22%, signal=52%	Tram1l1/Sec61b/Srprb/Sec61a1/Ssr3/Srp9/Srp19/Tram1/Srp72/Srp68/Srp54a/Sec63
GO:0071772	response to BMP	113	0.389912	1.4007	0.0113405	0.0113405	0.0468422	921	tags=17%, list=7%, signal=16%	Grem2/Sfrp1/Fst/Sfrp2/Comp/Scx/Bmpr1b/Bmper/Fbn1/Tnfaip6/Wnt5a/Ror2/Fstl1/Bmpr1a/Neo1/Fzd1/Sulf1/Nfix/Tmem53
GO:0071773	cellular response to BMP stimulus	113	0.389912	1.4007	0.0113405	0.0113405	0.0468422	921	tags=17%, list=7%, signal=16%	Grem2/Sfrp1/Fst/Sfrp2/Comp/Scx/Bmpr1b/Bmper/Fbn1/Tnfaip6/Wnt5a/Ror2/Fstl1/Bmpr1a/Neo1/Fzd1/Sulf1/Nfix/Tmem53
GO:0071692	protein localization to extracellular region	315	-0.321794	-1.30119	0.0113508	0.0113508	0.0468422	2015	tags=23%, list=15%, signal=21%	Tcirg1/Rab11b/Slc4a8/Il1rn/Rab11fip5/Rab8b/Tlr4/Rab27a/Stxbp5/Tnf/Nagpa/Anxa7/Psap/Slc25a22/Tgfb1/Slc12a2/Gnaq/Klf7/Midn/Cd2ap/Bloc1s6/Lrp5/Tlr2/Foxo1/Ucp2/Adora2a/Hmga1/Inhbb/Gja1/Plek/Orai1/P2rx7/Glul/Pde1c/Rhbdf2/Pim3/Slc8b1/Atp13a2/Myo18a/Sncg/Rapgef4/Arrb1/Syt7/Vegfc/Sybu/Rph3al/Pparg/Acvr2b/Il1b/Cavin1/Plcb1/Lepr/Kcnb1/Prkcb/Apoe/Abcg1/Abca1/Unc13b/Nos2/Kcnq1/Pde8b/Rab3b/Cd200/Trem2/Pcsk1/E…
GO:0150076	neuroinflammatory response	67	-0.458061	-1.53383	0.0113903	0.0113903	0.0469611	1999	tags=39%, list=15%, signal=33%	Nr3c1/Vps54/Tlr4/Nampt/Tnf/Tlr1/Plcg2/Stap1/Tnfrsf1b/Ifngr1/Tlr2/C5ar1/Adora2a/Tafa3/Clu/Csf1r/Aif1/Tyrobp/Pparg/Il1b/C1qa/Cx3cr1/Tlr3/Cd200/Trem2/Kcnj8
GO:0031346	positive regulation of cell projection organization	381	0.312512	1.29414	0.0114126	0.0114126	0.0470083	1332	tags=17%, list=10%, signal=15%	Zfp804a/Nrg1/Serpinf1/Lif/Ephb2/P3h1/Epha3/Shox2/Cxcl5/Obsl1/Crabp2/Tnn/Ndrg4/Mdk/Fn1/Wnt5a/Tgfb3/Tenm3/Sphk1/Ror2/Pak3/Ptn/Tubb2b/Tiam1/Numbl/Lrp1/Fam98a/Fzd1/Fgfr1/Tnfrsf12a/Dbn1/Magi2/Rhoq/Ahi1/Robo1/Arhgap32/Pak1/Cdc42ep5/Nme2/Ptk7/Ptprf/Hspa5/Ezh2/Ift20/Bhlhb9/Sema5a/Vegfa/Serpine2/F2rl1/Plce1/Hgf/Mns1/Anln/Dpysl3/Wls/Fxn/Plxnb2/Nme1/Dlg4/Metrn/Cx3cl1/Arap1/Carmil1
GO:0019433	triglyceride catabolic process	12	-0.724474	-1.67106	0.0117194	0.0117194	0.0482267	1429	tags=58%, list=10%, signal=52%	Sorl1/Lpl/Pnpla2/Pik3cg/Lipe/Apoc2/Gpihbp1
GO:0070672	response to interleukin-15	11	-0.730803	-1.65325	0.0117418	0.0117418	0.0482733	1141	tags=45%, list=8%, signal=42%	Stat5b/Jak3/Il15/Plcb1/Il2rg
GO:1904861	excitatory synapse assembly	26	0.59134	1.66566	0.0118066	0.0118066	0.0484692	1228	tags=31%, list=9%, signal=28%	C1ql3/Abi3bp/Ptprs/Lrfn1/Lrfn4/Ptpn13/Nrxn2/Plxnb2
GO:0014070	response to organic cyclic compound	509	-0.299014	-1.26996	0.0118117	0.0118117	0.0484692	2288	tags=24%, list=17%, signal=21%	Fkbp1a/Calcoco1/Hba-a1/Rftn1/Dab2/Fes/Pld2/Stat5b/Zc3h12a/Hrh1/Cflar/Jak2/Fosl2/Ep300/Eif2ak2/Ncoa2/Kdm4c/Msn/Nr3c1/Id3/Trim24/Acr/Ppp1r9b/Rxra/Epg5/Vps54/Casp9/Il1rn/Tlr7/Npr2/Ralb/Grk2/Plcg1/Rapgef2/Fam210b/Tnf/Htr7/Casp7/Wbp2/Bmp2/Srarp/Anxa7/Cdk6/Igfbp5/P2ry12/Ctnna1/Tgfb1/Zmiz1/Gnaq/Aldh2/Plcg2/Lipa/Hdac5/Adrb2/Bmp4/Inpp5k/Ctnnb1/Il10/Smad1/P2ry6/Ifih1/Crebrf/Kmt2d/Stat1/Ptch1/Bcl2l1/Rapgef1…
GO:0050871	positive regulation of B cell activation	74	-0.445359	-1.5055	0.0118487	0.0118487	0.0485752	2828	tags=41%, list=21%, signal=32%	Card11/Tirap/Bcl2/Tnip2/Cd81/Cdkn1a/Stat5b/Gpr183/Sash3/Tlr4/Nckap1l/Slc39a10/Cd27/Tgfb1/Ptprc/Il10/Cd40/Kmt5b/Syk/Atp11c/Cd74/Tnfsf13/Spi1/Nod2/Inpp5d/Bst1/Mef2c/Il2rg/Cd38/Ighm
GO:0042063	gliogenesis	303	-0.329151	-1.32336	0.011888	0.011888	0.0486906	1701	tags=22%, list=12%, signal=20%	Bmp2/Anxa7/Cdk6/Enpp2/P2ry12/Nab1/Ccl3/Tgfb1/Zmiz1/Bmp4/Stap1/Ctnnb1/Nfib/Cd9/Tnfrsf1b/Fgfr3/Ifngr1/Dab2ip/Cnp/Dcx/Dmd/Itgb4/Tlr2/C5ar1/Adora2a/Daam2/Mapk3/Clu/Arhgef7/Csf1r/Rb1/Sh3tc2/Notch1/Syne2/Plpp3/Tppp/Vegfc/Lyn/Pparg/Il1b/Sox13/Afdn/C1qa/Ptprb/Lepr/Flt1/Cxcr4/Tspan2/Cx3cr1/Mycn/Pdgfb/Prkch/Dll1/Cysltr1/Dhh/Tnfrsf21/Ccr2/Vtn/Shank3/Casz1/Ntf3/Adgrg1/Atp1b2/Tal1/Trem2/Nrros/Ano1
GO:0002504	antigen processing and presentation of peptide or polysaccharide antigen via MHC class II	21	-0.629176	-1.66442	0.0119126	0.0119126	0.0487454	1723	tags=57%, list=13%, signal=50%	H2-Ob/H2-Eb1/Unc93b1/H2-DMa/H2-Aa/B2m/Cd74/H2-Ab1/Fcer1g/Fcgr2b/Ctss/Trem2
GO:0007507	heart development	520	0.29289	1.24802	0.0119707	0.0119707	0.0489373	1571	tags=18%, list=11%, signal=17%	Slit2/Rbp4/Lox/Nrg1/Sfrp2/Aldh1a2/Col11a1/Ccn4/Twist1/Osr1/Fhl2/Sgcd/Scx/Thbs1/Epha3/Fbn1/Fzd2/Col5a1/Shox2/Abi3bp/Has2/Sema3c/Slit3/Stil/Enpp1/Ndrg4/Fn1/Wnt5a/Col6a1/Wnt11/Vcan/Pcsk5/Col14a1/Inhba/Zfpm2/Col3a1/Emilin1/Kcnk2/Fdps/Bmpr1a/Slc8a1/Ncam1/Pdpn/Angpt1/Lrp1/Bicc1/Fzd1/Pdlim2/Fgfr1/Lefty1/Egfr/Acan/Igf1/Irx3/Fgf2/Mmp2/Cdk1/Ank2/Fgfrl1/Robo1/Tbx18/Pak1/Tpm1/Ptk7/Gli3/Sgcb/Nfix/Nfatc4/Ift20…
GO:1905606	regulation of presynapse assembly	16	0.686057	1.7211	0.0120034	0.0120034	0.0489994	2399	tags=50%, list=17%, signal=41%	Nrg1/Mdga1/Fzd1/Lrfn4/Farp1/Gpc4/Nlgn2/Lrfn3
GO:0010463	mesenchymal cell proliferation	50	0.505404	1.61609	0.0120084	0.0120084	0.0489994	2117	tags=42%, list=15%, signal=36%	Prrx2/Osr1/Fgf7/Shox2/Wnt5a/Wnt11/Ptn/Bmpr1a/Prrx1/Fgfr1/Tbx18/Six2/Sox9/Six1/Irs1/Gas1/Irs2/Smo/Dchs2/Myc/Gpc3
GO:0061081	positive regulation of myeloid leukocyte cytokine production involved in immune response	36	-0.551694	-1.61578	0.0120323	0.0120323	0.0490512	2791	tags=56%, list=20%, signal=44%	Tirap/Mavs/Casp1/Casp4/Tlr7/Tlr4/Plcg2/Nod1/Gprc5b/Tlr2/Sema7a/P2rx7/Syk/Cd74/Fcer1g/Nod2/Laptm5/Tlr3/Cd36/Kit
GO:0042472	inner ear morphogenesis	74	0.445954	1.51891	0.0120769	0.0120769	0.0491867	996	tags=27%, list=7%, signal=25%	Cthrc1/Prrx2/Aldh1a3/Col11a1/Ephb2/Lrig3/Fzd2/Wnt5a/Ror2/Prrx1/Fgfr1/Sobp/Tbx18/Ttc39c/Ptk7/Fzd3/Gbx2/Lrig1/Sox9/Six1
GO:0071902	positive regulation of protein serine/threonine kinase activity	141	-0.382611	-1.41918	0.0121544	0.0121544	0.0494507	2002	tags=30%, list=15%, signal=26%	Adam17/Ccny/Dipk2a/Ralb/Tlr4/Rapgef2/Tnf/Cd24a/Insr/Sash1/Ptprc/Adrb2/Rgcc/Cd40/Dab2ip/Map2k6/Fgd2/Fzd4/P2rx7/Irgm2/Tcim/Syk/Pdgfd/Tnfrsf11a/Igtp/Atp2b4/Ceacam1/Arhgef5/Il1b/Pik3cg/Kitl/Flt1/Map3k1/Ccnd1/Map3k11/Pdgfb/Irgm1/Kit/Ntf3/Pik3r6/C1qtnf9/Edn3/Ccr7
GO:0060837	blood vessel endothelial cell differentiation	11	-0.729542	-1.65039	0.0121688	0.0121688	0.0494507	2684	tags=64%, list=20%, signal=51%	Tmem100/Foxj2/Lipa/Hey1/Notch1/Dll1/Kdr
GO:0072659	protein localization to plasma membrane	261	-0.33251	-1.32165	0.0121791	0.0121791	0.0494507	2315	tags=25%, list=17%, signal=21%	Rab11a/Dab2/Frmd8/Cnst/Camk2g/Macf1/Rhog/Stx7/Rilpl1/Lgals3/Numb/Ppp1r9b/Trarg1/Rab8b/Tmbim1/Ldlrap1/Rapgef2/Tnf/Vamp3/Kif13a/Wnk1/Lypla1/Stac/Tgfb1/Gga3/Pid1/Inpp5k/Sorl1/Fcho2/Atp1b3/Ttc7b/Sorbs1/Cln3/Ptch1/Sptbn1/Bcl2l1/Ikbkb/Ehd3/Ppp2r5a/Tspan14/Zdhhc2/Pkp3/Rhbdf2/Epha2/Fcer1g/Atp2b4/Itga3/Afdn/Kcnb1/Jup/Ehd4/Ramp2/Efr3b/Ehd2/Lama5/Abi3/Rab3b/Tspan15/Trem2/Tmem88/F11r/Ramp3/Akap5/Tesc
GO:0015837	amine transport	65	-0.462122	-1.53685	0.0121871	0.0121871	0.0494507	2116	tags=38%, list=15%, signal=33%	Arl6ip1/Nr3c1/Il1rn/Grk2/Tnf/Dpysl2/P2ry12/Slc12a2/Pink1/Cxcl12/Rgs2/Adora2a/P2rx7/Syt15/Sncg/Ptgs1/Syt7/Slc43a2/Il1b/Kcnb1/Entpd1/Prkcb/Agtr2/Rab3b/Chga
GO:0099622	cardiac muscle cell membrane repolarization	20	-0.625642	-1.63017	0.0122177	0.0122177	0.0495188	1046	tags=30%, list=8%, signal=28%	Gja1/Kcnj2/Kcnq1/Kcna5/Gja5/Kcnj8
GO:0008299	isoprenoid biosynthetic process	24	0.619515	1.7299	0.0122266	0.0122266	0.0495188	2865	tags=67%, list=21%, signal=53%	Aldh1a3/Aldh1a2/Rbp1/Fdps/Aldh1a1/Mvd/Idi1/Lss/Mvk/Hmgcr/Hmgcs1/Prmt3/Coq2/Pmvk/Rdh10/Fdft1
GO:0035855	megakaryocyte development	19	-0.644546	-1.66768	0.0123122	0.0123122	0.0498192	2100	tags=47%, list=15%, signal=40%	Ep300/Wasf2/Zfpm1/Ptpn6/Sh2b3/Nbeal2/Kit/Tal1/Fli1
GO:0051924	regulation of calcium ion transport	202	-0.350053	-1.36248	0.012333	0.012333	0.0498572	1943	tags=28%, list=14%, signal=24%	Cxcl10/Fyn/Pawr/Plcg1/Tspan18/Coro1a/Gnai2/Il16/P2ry12/Stac/Tgfb1/Pde4b/Plcg2/Adrb2/Bmp4/Cacng1/Inpp5k/Ctnnb1/Cxcl12/Mylk/Dmd/Jak3/Adora2a/Gja1/Ehd3/Orai1/P2rx7/Stc1/Ace/Gstm7/Dysf/Ahr/Slc8b1/Mrln/Ptpn6/Chd7/Lyn/Pik3cg/Cd84/Cxcr4/Slc30a1/Rapgef3/Cracr2b/Pdgfb/Cav1/Gimap5/F2rl3/Nos3/Hrc/Tspan13/Clec4b1/Aplnr/Trpc3/Atp1a2/Akap5/Casq2
GO:0030852	regulation of granulocyte differentiation	16	-0.674055	-1.65586	0.0123573	0.0123573	0.0499089	691	tags=50%, list=5%, signal=48%	Prdm16/Ceacam1/Inpp5d/Zbtb46/Ikzf1/C1qc/Hcls1/Tesc
GO:0061615	glycolytic process through fructose-6-phosphate	24	0.618439	1.72689	0.0123804	0.0123804	0.049956	1839	tags=42%, list=13%, signal=36%	Tpi1/Galk1/Pgk1/Eno1/Gale/Pkm/Aldoa/Eno2/Eno1b/Gapdh
GO:0006735	NADH regeneration	17	0.671076	1.7092	0.0125358	0.0125358	0.0503964	1839	tags=47%, list=13%, signal=41%	Tpi1/Pgk1/Eno1/Pkm/Aldoa/Eno2/Eno1b/Gapdh
GO:0061621	canonical glycolysis	17	0.671076	1.7092	0.0125358	0.0125358	0.0503964	1839	tags=47%, list=13%, signal=41%	Tpi1/Pgk1/Eno1/Pkm/Aldoa/Eno2/Eno1b/Gapdh
GO:0061718	glucose catabolic process to pyruvate	17	0.671076	1.7092	0.0125358	0.0125358	0.0503964	1839	tags=47%, list=13%, signal=41%	Tpi1/Pgk1/Eno1/Pkm/Aldoa/Eno2/Eno1b/Gapdh
GO:0010470	regulation of gastrulation	12	0.720565	1.68454	0.0125358	0.0125358	0.0503964	773	tags=25%, list=6%, signal=24%	Osr1/Scx/Osr2
GO:0019915	lipid storage	70	-0.452882	-1.52453	0.012598	0.012598	0.0505997	2249	tags=34%, list=16%, signal=29%	Nr1h2/Stat5b/Zc3h12a/Tnf/Gm2a/Mospd2/Lipa/Stard4/Lpl/Msr1/Acacb/Dysf/Rnf213/Cds2/Pnpla2/Pparg/Il1b/Cds1/Apoe/Abcg1/Cd36/Cav1/Trem2/Scarb1
GO:0072665	protein localization to vacuole	72	-0.453078	-1.53106	0.0127381	0.0127381	0.0510838	3657	tags=36%, list=27%, signal=27%	Mon1a/Rab7/Vps13c/Pik3c3/Lamtor5/Sort1/Atg14/Cd81/Vps13a/Ncoa4/Vps37b/Mfsd1/Becn1/Vps54/Sh3bp4/Vps13d/Gga3/Lmbrd1/Sorl1/Gpr137b/Irgm2/Clu/Atp13a2/Igtp/Laptm5/Irgm1
GO:0070252	actin-mediated cell contraction	70	-0.452525	-1.52333	0.012742	0.012742	0.0510838	970	tags=21%, list=7%, signal=20%	Stc1/Cacna1h/Kcnj2/Shtn1/Jup/Ccdc88c/Kcnq1/Cav1/Limch1/Kcna5/Gja5/Atp1a2/Abcc9/Casq2/Kcnj8
GO:0045137	development of primary sexual characteristics	161	0.374115	1.40557	0.0129292	0.0129292	0.0517867	1075	tags=19%, list=8%, signal=17%	Rbp4/Sfrp1/Fst/Sfrp2/Ptx3/Osr1/Fgf7/Serpine1/Bmpr1b/Tnfaip6/Pla2g4a/Nupr1/Runx1/Wnt5a/Inhba/Zfpm2/Rhobtb3/Aspm/Angpt1/Brip1/Mmp2/Rnase10/Ptprn/Fancf/Vegfa/Sox9/Pdgfra/Itgav/Gas2/Fanca
GO:0090103	cochlea morphogenesis	21	0.641415	1.72272	0.0129557	0.0129557	0.0518451	1421	tags=38%, list=10%, signal=34%	Cthrc1/Fzd2/Wnt5a/Tbx18/Ptk7/Sox9/Six1/Gli2
GO:0002922	positive regulation of humoral immune response	10	-0.757538	-1.66367	0.01309	0.01309	0.0522867	1838	tags=80%, list=13%, signal=69%	Tnf/Ptprc/H2-DMa/Nod2/Il1b/Gimap5/Trem2/Ccr7
GO:0090209	negative regulation of triglyceride metabolic process	10	-0.757371	-1.6633	0.01309	0.01309	0.0522867	1429	tags=50%, list=10%, signal=45%	Esr1/Sorl1/Apobec1/Pik3cg/Apoe
GO:1903530	regulation of secretion by cell	463	-0.302274	-1.27122	0.0132446	0.0132446	0.0528558	2268	tags=28%, list=16%, signal=24%	Dab2/Fes/Stxbp2/Abr/Nr1h2/Pld2/Frmd4a/Jak2/Bcr/Lgals3/Ep300/Npy1r/Pnkd/Tcirg1/Slc4a8/Nr3c1/Il1rn/Rab11fip5/Rab8b/Grk2/Tlr4/Rab27a/Stxbp5/Tnf/Htr7/Vamp3/Nckap1l/Bmp2/Atp9a/Anxa7/Dpysl2/Gnai2/Lgals9/P2ry12/Cplx2/Slc25a22/Tgfb1/Sdcbp/Slc12a2/Gnaq/Ric1/Rgcc/Pink1/Klf7/Midn/Cd2ap/P2ry2/Cxcl12/Tnfrsf1b/Apln/Git1/Map2k6/Gata2/Lrp5/Tlr2/Git2/Bcl2l1/Foxo1/Ucp2/Adora2a/Inhbb/Gja1/Orai1/P2rx7/Glul/Ica1/Syt1…
GO:0060337	type I interferon-mediated signaling pathway	56	-0.489507	-1.58374	0.0133437	0.0133437	0.053085	3144	tags=45%, list=23%, signal=35%	Oas1c/Lsm14a/Ifnar1/Hdac4/Dcst1/Usp27x/Ifnar2/Mavs/Mmp12/Tyk2/Tbk1/Samhd1/Ifitm1/Adar/Ifitm3/Ifih1/Stat1/Trim56/Stat2/Oas2/Oas1a/Isg15/Trim6/Irf7/Nlrc5
GO:0071357	cellular response to type I interferon	56	-0.489507	-1.58374	0.0133437	0.0133437	0.053085	3144	tags=45%, list=23%, signal=35%	Oas1c/Lsm14a/Ifnar1/Hdac4/Dcst1/Usp27x/Ifnar2/Mavs/Mmp12/Tyk2/Tbk1/Samhd1/Ifitm1/Adar/Ifitm3/Ifih1/Stat1/Trim56/Stat2/Oas2/Oas1a/Isg15/Trim6/Irf7/Nlrc5
GO:0030856	regulation of epithelial cell differentiation	117	-0.385527	-1.38947	0.0133437	0.0133437	0.053085	2360	tags=40%, list=17%, signal=34%	Gata3/Nfe2l1/Stat5b/Wwtr1/Commd5/Apc/Foxj2/Numb/Cdkn1c/Tnf/Sfn/Foxc1/Cd24a/Spred2/Bmp2/Cd109/Id1/Bmp4/Klf7/Ctnnb1/Fgfr3/Hoxa7/Atoh8/Hey1/Ptch1/Ikbkb/Fat4/Csf1r/Bmp6/Notch1/Apold1/Ncoa3/Tbx3/Ceacam1/Il1b/Plcb1/Cldn5/Prom1/Ccnd1/Mycn/Notch4/Prkch/Dll1/Cav1/Cdh5/F11r/Xdh
GO:0006303	double-strand break repair via nonhomologous end joining	64	0.451834	1.5044	0.0133508	0.0133508	0.053085	3540	tags=44%, list=26%, signal=33%	Usp51/Aunip/Plk1/Xrcc5/Lig1/Parp3/Polq/Nhej1/Nsd2/Topbp1/Paxx/Aplf/Pola1/Xrcc1/Prpf19/Xrcc6/Mlh1/Wrap53/Dek/Rnf168/Hmga2/Dclre1a/Shld3/Psmd14/Helq/Polb/Fh1/Rif1
GO:0050432	catecholamine secretion	39	-0.525984	-1.56813	0.013446	0.013446	0.0534151	1602	tags=38%, list=12%, signal=34%	Grk2/P2ry12/Pink1/Cxcl12/Adora2a/Syt15/Sncg/Ptgs1/Syt7/Tgm2/Kcnb1/Entpd1/Prkcb/Agtr2/Chga
GO:0016485	protein processing	196	0.34981	1.3402	0.0134859	0.0134859	0.0534878	1605	tags=24%, list=12%, signal=22%	Pcsk9/Comp/Nkd2/Serpine1/Thbs1/F3/Ifi205/Spon1/Aebp1/Ccbe1/Adamts2/Pcsk5/Bag2/Ece2/Arxes1/P4hb/Pgk1/Bmp1/Gli3/Nol3/Arxes2/Eno1/Mme/Gsn/Ifi211/Serpine2/C1rl/Asph/Fxn/Dhcr24/Sec11a/Yipf5/Bace1/Hsp90b1/H13/Mmp16/Spcs1/Gas1/Adamts3/Pcsk6/Anpep/Timm23/Cpz/Tmem208/Plat/Src/Eno1b/Rce1
GO:0050995	negative regulation of lipid catabolic process	20	-0.622226	-1.62127	0.0134889	0.0134889	0.0534878	1838	tags=35%, list=13%, signal=30%	Tnf/Sorl1/Acacb/Il1b/Pik3cg/Gimap5/Endou
GO:0060326	cell chemotaxis	240	-0.338789	-1.33982	0.0135137	0.0135137	0.0535375	2174	tags=37%, list=16%, signal=31%	Gpr183/Rhog/Bin2/Lgals3/Dusp1/Adam17/Adam8/Plec/Mpp1/Trpv4/Mtus1/Cxcl10/Prex1/Coro1a/Coro1b/Akirin1/Ptpro/Csf3r/Wnk1/Nckap1l/Enpp2/Ccl12/Il16/Ccl3/Mospd2/Slc12a2/Pde4b/Rin3/Stap1/Cxcl12/Ackr3/Itga9/Dapk2/Hspb1/Ccrl2/Plekhg5/C5ar1/Pf4/Adam10/Ccr5/Mapk3/Dock4/Eng/Nrp1/Ccl9/Itgb2/Syk/Pdgfd/Csf1r/Notch1/Ccl8/Itga1/Dysf/Cd74/Prkd2/Slc8b1/Rac2/Fcgr3/Epha2/Aif1/Spi1/Fcer1g/Nod2/Hoxb9/Vegfc/Lyn/Bst1/Arhg…
GO:0030595	leukocyte chemotaxis	177	-0.355698	-1.36349	0.0135405	0.0135405	0.0535952	2118	tags=38%, list=15%, signal=32%	Lgals3/Dusp1/Adam17/Adam8/Plec/Mpp1/Trpv4/Mtus1/Cxcl10/Prex1/Coro1a/Akirin1/Ptpro/Csf3r/Wnk1/Nckap1l/Ccl12/Il16/Ccl3/Mospd2/Slc12a2/Pde4b/Rin3/Stap1/Cxcl12/Itga9/Dapk2/C5ar1/Pf4/Adam10/Mapk3/Ccl9/Itgb2/Syk/Csf1r/Ccl8/Itga1/Dysf/Cd74/Slc8b1/Rac2/Fcgr3/Aif1/Spi1/Fcer1g/Nod2/Vegfc/Lyn/Bst1/Arhgef5/Il1b/Pla2g7/Flt1/C3ar1/S1pr1/Cx3cr1/Pdgfb/Ccr2/Kit/Ch25h/Slamf9/Ednrb/Msmp/Edn3/Ccl6/Ccr7/Chga
GO:0009187	cyclic nucleotide metabolic process	22	-0.604536	-1.59649	0.0135661	0.0135661	0.0536076	1959	tags=45%, list=14%, signal=39%	Pde9a/Adcy9/Npr2/Cnp/Epha2/Adcy4/Pde2a/Gucy1b1/Npr1/Gucy1a1
GO:0044774	mitotic DNA integrity checkpoint signaling	78	0.442885	1.52323	0.0135683	0.0135683	0.0536076	2116	tags=27%, list=15%, signal=23%	Clspn/Brca1/Orc1/Dtl/Ticrr/Rpa2/Blm/Creb3l1/Cdk1/Plk1/Donson/Cdk5rap3/Brsk1/Ier3/Fancd2/Cdc6/Rint1/Atm/Eme1/Chek1/Topbp1
GO:0008284	positive regulation of cell population proliferation	762	0.27923	1.21585	0.0135933	0.0135933	0.0536577	1622	tags=18%, list=12%, signal=17%	Igfbp2/Timp1/Twist2/Sfrp1/Clec11a/Thbs4/Nrg1/Sfrp2/Cthrc1/Prrx2/Aldh1a2/Comp/Ccl2/Lif/Cdh3/Ccn4/Twist1/Osr1/Tnc/Fgf7/Serpine1/Scx/Ephb2/Thbs1/Tmem119/F3/Vegfd/Cd248/Scube2/Meis3/Shox2/Cxcl1/Crlf1/Pla2g4a/Has2/Pth1r/S100b/Mdk/Fn1/Wnt5a/Tgfb3/Meis2/Vcan/Prkca/Fbln1/Prc1/Avpr1a/Il11ra1/Sphk1/Ptgs2/Kif14/Ccne1/Zfpm2/Ptn/Ccn2/Aspm/Ltbp3/Bmpr1a/Tiam1/Anxa1/Orc1/Prrx1/Ncam1/F2r/Mab21l2/Fam98a/Mif/Blm/Fg…
GO:0010811	positive regulation of cell-substrate adhesion	119	0.39226	1.42138	0.0136517	0.0136517	0.0538395	1451	tags=24%, list=11%, signal=22%	Col8a1/Smoc1/Ccdc80/Efemp2/Thbs1/Abi3bp/Col16a1/Has2/Thy1/Mdk/Fn1/Smoc2/Fbln1/Pcsk5/Emilin1/Ptn/Dbn1/Hacd1/P4hb/Rac3/Csf1/Spp1/Vegfa/Cspg5/Egfl6/Fbln2/Carmil1/Skap1/Calr
GO:0042073	intraciliary transport	39	0.529615	1.62563	0.0137432	0.0137432	0.0541402	3369	tags=51%, list=24%, signal=39%	Wdr35/Lca5l/Ift20/Ift74/Ift27/Arl3/Ift43/Dync2li1/Dync2h1/Wdpcp/Ift57/Ift81/Ift22/Nme7/Wdr19/Ssna1/Ttc21a/Ift46/Ssx2ip/Cep131
GO:1903036	positive regulation of response to wounding	59	0.468347	1.52614	0.0137528	0.0137528	0.0541402	593	tags=20%, list=4%, signal=20%	Nrg1/Ccl2/Ccn4/Serpine1/Thbs1/Tmem97/Mdk/Smoc2/Ptn/Anxa1/F2r/Lrp1
GO:0032623	interleukin-2 production	58	-0.472357	-1.54339	0.0138032	0.0138032	0.0542895	3335	tags=52%, list=24%, signal=39%	Malt1/Prnp/Homer3/Traf6/Irf4/Il1a/Card11/Zfp36/Gata3/Stat5b/Lilrb4a/Hdac7/Fosl2/Sash3/Pawr/Ptprc/Pde4b/Plcg2/Il20rb/Sptbn1/Cd83/Prkd2/Fcer1g/Nod2/Laptm5/Il1b/Cd34/Cd247/Ccr2/Slc11a1
GO:0032652	regulation of interleukin-1 production	97	-0.413836	-1.44816	0.0138469	0.0138469	0.0544122	2243	tags=37%, list=16%, signal=31%	Casp4/Zc3h12a/Tmem106a/Lilrb4a/Jak2/Casp8/Nlrp10/Tlr4/Tnf/Lgals9/Il16/Nlrp3/Ccl3/Ifi206/Nod1/Ifi207/Hspb1/Git1/Lpl/Mndal/Tlr2/Ccr5/P2rx7/Ifi209/Nod2/Tyrobp/Ceacam1/Ifi203/Cx3cr1/Cd36/Aim2/Gbp5/Trem2/Ifi213/Ifi208/Ccr7
[truncated: 518 more rows]

## Sheet: KEGG
ID	Description	setSize	enrichmentScore	NES	pvalue	p.adjust	qvalue	rank	leading_edge	core_enrichment
[truncated: 106 more rows]
