# Supplementary material for: Single-Cell Transcriptomics Highlights Macrophage-Driven Regulation of EndMT and Repair in Injured Muscle
Source: Research Square preprint supplement (doi:10.21203/rs.3.rs-6288736/v1), 2025-04-24
Supplement: Supplementary file 4 [file c9ba0c78be834e9d23b183a5.xlsx]

## Sheet: SHAM
source	target	ligand	receptor	prob	pval	interaction_name	interaction_name_2	pathway_name	annotation	evidence
MPs	ECs	Gdf15	Tgfbr2	0.011929	0	GDF15_TGFBR2	Gdf15 - Tgfbr2	GDF	Secreted Signaling	KEGG: mmu04350
MPs	ECs	Tnf	Tnfrsf1a	0.00346769	0	TNF_TNFRSF1A	Tnf - Tnfrsf1a	TNF	Secreted Signaling	KEGG: mmu04060
MPs	ECs	Lgals9	Cd44	0.000838646	0	LGALS9_CD44	Lgals9 - Cd44	GALECTIN	Secreted Signaling	PMID: 25065622
MPs	ECs	Col1a1	ITGA1_ITGB1	0.0739332	0	COL1A1_ITGA1_ITGB1	Col1a1 - (Itga1+Itgb1)	COLLAGEN	ECM-Receptor	KEGG: mmu04512
MPs	ECs	Col1a2	ITGA1_ITGB1	0.0680654	0	COL1A2_ITGA1_ITGB1	Col1a2 - (Itga1+Itgb1)	COLLAGEN	ECM-Receptor	KEGG: mmu04512
MPs	ECs	Col6a1	ITGA1_ITGB1	0.00873297	0	COL6A1_ITGA1_ITGB1	Col6a1 - (Itga1+Itgb1)	COLLAGEN	ECM-Receptor	KEGG: mmu04512
MPs	ECs	Col6a2	ITGA1_ITGB1	0.00349683	0	COL6A2_ITGA1_ITGB1	Col6a2 - (Itga1+Itgb1)	COLLAGEN	ECM-Receptor	KEGG: mmu04512
MPs	ECs	Col6a3	ITGA1_ITGB1	0.0207435	0	COL6A3_ITGA1_ITGB1	Col6a3 - (Itga1+Itgb1)	COLLAGEN	ECM-Receptor	KEGG: mmu04512
MPs	ECs	Thbs1	Cd36	0.0314067	0	THBS1_CD36	Thbs1 - Cd36	THBS	ECM-Receptor	KEGG: mmu04512
MPs	ECs	Thbs2	Cd36	0.00515924	0	THBS2_CD36	Thbs2 - Cd36	THBS	ECM-Receptor	KEGG: mmu04512
MPs	ECs	Thbs4	Cd36	0.027388	0	THBS4_CD36	Thbs4 - Cd36	THBS	ECM-Receptor	KEGG: mmu04512
MPs	ECs	Thbs1	Cd47	0.0155664	0	THBS1_CD47	Thbs1 - Cd47	THBS	ECM-Receptor	KEGG: mmu04512

## Sheet: CLL
source	target	ligand	receptor	prob	pval	interaction_name	interaction_name_2	pathway_name	annotation	evidence
MPs	ECs	Gdf15	Tgfbr2	0.00684475	0	GDF15_TGFBR2	Gdf15 - Tgfbr2	GDF	Secreted Signaling	KEGG: mmu04350
MPs	ECs	Pdgfa	Pdgfra	0.000140562	0	PDGFA_PDGFRA	Pdgfa - Pdgfra	PDGF	Secreted Signaling	PMID: 15207812
MPs	ECs	Pdgfa	Pdgfrb	0.000278519	0	PDGFA_PDGFRB	Pdgfa - Pdgfrb	PDGF	Secreted Signaling	PMID: 15207812
MPs	ECs	Pdgfb	Pdgfra	0.000143905	0	PDGFB_PDGFRA	Pdgfb - Pdgfra	PDGF	Secreted Signaling	PMID: 15207812
MPs	ECs	Pdgfb	Pdgfrb	0.00028514	0	PDGFB_PDGFRB	Pdgfb - Pdgfrb	PDGF	Secreted Signaling	PMID: 15207812
MPs	ECs	Igf1	Igf1r	0.00227151	0	IGF1_IGF1R	Igf1 - Igf1r	IGF	Secreted Signaling	PMID: 14604834
MPs	ECs	Osm	OSMR_IL6ST	0.00117431	0	OSM_OSMR_IL6ST	Osm - (Osmr+Il6st)	OSM	Secreted Signaling	KEGG: mmu04060
MPs	ECs	Tnf	Tnfrsf1a	0.0103778	0	TNF_TNFRSF1A	Tnf - Tnfrsf1a	TNF	Secreted Signaling	KEGG: mmu04060
MPs	ECs	Tnfsf12	Tnfrsf12a	0.00247635	0	TNFSF12_TNFRSF12A	Tnfsf12 - Tnfrsf12a	TWEAK	Secreted Signaling	KEGG: mmu04060
MPs	ECs	Spp1	Cd44	0.0188638	0	SPP1_CD44	Spp1 - Cd44	SPP1	Secreted Signaling	PMID: 21907263
MPs	ECs	Spp1	ITGAV_ITGB1	0.0314373	0	SPP1_ITGAV_ITGB1	Spp1 - (Itgav+Itgb1)	SPP1	Secreted Signaling	PMID: 21907263
MPs	ECs	Spp1	ITGAV_ITGB5	0.0107271	0	SPP1_ITGAV_ITGB5	Spp1 - (Itgav+Itgb5)	SPP1	Secreted Signaling	PMID: 21907263
MPs	ECs	Spp1	ITGA5_ITGB1	0.0351978	0	SPP1_ITGA5_ITGB1	Spp1 - (Itga5+Itgb1)	SPP1	Secreted Signaling	PMID: 21907263
MPs	ECs	Nampt	ITGA5_ITGB1	0.00496783	0	NAMPT_ITGA5_ITGB1	Nampt - (Itga5+Itgb1)	VISFATIN	Secreted Signaling	PMID: 28490838
MPs	ECs	Gas6	Axl	0.00225177	0	GAS6_AXL	Gas6 - Axl	GAS	Secreted Signaling	PMID: 27801848
MPs	ECs	Col1a1	ITGA1_ITGB1	0.0399699	0	COL1A1_ITGA1_ITGB1	Col1a1 - (Itga1+Itgb1)	COLLAGEN	ECM-Receptor	KEGG: mmu04512
MPs	ECs	Col1a2	ITGA1_ITGB1	0.0346179	0	COL1A2_ITGA1_ITGB1	Col1a2 - (Itga1+Itgb1)	COLLAGEN	ECM-Receptor	KEGG: mmu04512
MPs	ECs	Col6a1	ITGA1_ITGB1	0.00279396	0	COL6A1_ITGA1_ITGB1	Col6a1 - (Itga1+Itgb1)	COLLAGEN	ECM-Receptor	KEGG: mmu04512
MPs	ECs	Col6a3	ITGA1_ITGB1	0.00449065	0	COL6A3_ITGA1_ITGB1	Col6a3 - (Itga1+Itgb1)	COLLAGEN	ECM-Receptor	KEGG: mmu04512
MPs	ECs	Thbs1	Cd36	0.00286149	0	THBS1_CD36	Thbs1 - Cd36	THBS	ECM-Receptor	KEGG: mmu04512
MPs	ECs	Thbs4	Cd36	0.00678542	0	THBS4_CD36	Thbs4 - Cd36	THBS	ECM-Receptor	KEGG: mmu04512
MPs	ECs	Sema4d	Plxnb2	0.000760024	0	SEMA4D_PLXNB2	Sema4d - Plxnb2	SEMA4	Cell-Cell Contact	PMID: 27533782
MPs	ECs	ITGA4_ITGB1	Vcam1	0.00252243	0	ITGA4_ITGB1_VCAM1	Vcam1 - (Itga4+Itgb1)	VCAM	Cell-Cell Contact	KEGG: mmu04514
MPs	ECs	ITGA9_ITGB1	Vcam1	0.00222514	0	ITGA9_ITGB1_VCAM1	Vcam1 - (Itga9+Itgb1)	VCAM	Cell-Cell Contact	KEGG: mmu04514
