# Supplementary material for: Single-Cell Transcriptomics Highlights Macrophage-Driven Regulation of EndMT and Repair in Injured Muscle
Source: Research Square preprint supplement (doi:10.21203/rs.3.rs-6288736/v1), 2025-04-24
Supplement: Supplementary file 5 [file d1b1cdb58983e2f50e5f1844.xlsx]

## Sheet: GO_BP
ID	Description	setSize	enrichmentScore	NES	pvalue	p.adjust	qvalue	rank	leading_edge	core_enrichment
GO:0032543	mitochondrial translation	128	0.657625	2.46056	1e-10	1e-10	2.10612e-08	3346	tags=57%, list=19%, signal=47%	Mrpl17/Mrps18b/Shmt2/Mrps6/Mrpl54/Mrpl12/Mrps16/Mrps7/Mrps34/Gadd45gip1/Mrpl20/Mrps12/Mrpl55/C1qbp/Mrpl49/Mrpl43/Tsfm/Mrps26/Mrps25/Mrpl16/Mrps24/Aurkaip1/Rcc1l/Mrpl18/Mrpl38/Coa3/Mrps23/Mrpl53/Mrpl41/Uqcc2/Mpv17l2/Mrps28/Chchd1/Mrpl28/Mrpl34/Mrpl15/Mrpl40/Mrpl22/Mrpl14/Mrps17/Mrps30/Dap3/Mrpl57/Mrpl21/Mrps14/Mrps15/Mrpl11/Mrpl2/Mrps11/Ears2/Mtg2/Mrpl42/Mrpl58/Mrpl35/Yars2/Mrpl19/Mrpl32/Mrpl51/Mr…
GO:0042254	ribosome biogenesis	305	0.573405	2.38269	1e-10	1e-10	2.10612e-08	4071	tags=55%, list=23%, signal=44%	Bop1/Utp18/Zfp593/Nop56/Bysl/Rrp1b/Rrp12/Mrto4/Ran/Eif6/Nhp2/Nop16/Ebna1bp2/Wdr18/Wdr75/Nat10/Dhx29/Noc2l/Ftsj3/Fbl/Rrp9/Mphosph10/Wdr46/Mak16/Gar1/Wdr74/Rrp7a/Isg20/Riox1/Mybbp1a/Mrps7/Ppan/Pno1/Mrpl20/Utp14b/Exosc4/Bud23/Rrp15/Grwd1/Nop2/Lyar/Rsl1d1/C1qbp/Nle1/Pop7/Ddx56/Ddx21/Exosc5/Mdn1/Wdr55/Ddx49/Ncl/Dimt1/Nol6/Rrp8/Znhit6/Imp4/Ddx54/Brix1/Exosc8/Nip7/Rcl1/Lsm6/Tsr1/Rrs1/Abce1/Pa2g4/Rps19bp…
GO:0022613	ribonucleoprotein complex biogenesis	419	0.547365	2.35265	1e-10	1e-10	2.10612e-08	4120	tags=53%, list=23%, signal=42%	Bop1/Utp18/Zfp593/Nop56/Bysl/Rrp1b/Rrp12/Mrto4/Ran/Eif6/Nhp2/Nop16/Ebna1bp2/Nol3/Wdr18/Wdr75/Nat10/Hsp90aa1/Dhx29/Noc2l/Ftsj3/Fbl/Rrp9/Mphosph10/Wdr46/Mak16/Gar1/Ruvbl2/Wdr74/Usp39/Rrp7a/Isg20/Riox1/Mybbp1a/Nufip1/Prpf31/Mrps7/Ppan/Pno1/Mrpl20/Utp14b/Exosc4/Bud23/Rrp15/Grwd1/Snrpd1/Gemin5/Nop2/Strap/Lyar/Rsl1d1/C1qbp/Nle1/Pop7/Lsm4/Ddx56/Wdr77/Ddx21/Exosc5/Mdn1/Wdr55/Ddx49/Ncl/Dimt1/Nol6/Rrp8/Znh…
GO:0006364	rRNA processing	210	0.558915	2.25291	1e-10	1e-10	2.10612e-08	3576	tags=51%, list=20%, signal=41%	Bop1/Utp18/Bysl/Rrp1b/Rrp12/Mrto4/Eif6/Nhp2/Ebna1bp2/Wdr18/Wdr75/Nat10/Ftsj3/Fbl/Rrp9/Mphosph10/Wdr46/Mak16/Gar1/Wdr74/Rrp7a/Isg20/Ppan/Utp14b/Exosc4/Bud23/Rrp15/Nop2/Lyar/Rsl1d1/Pop7/Ddx56/Ddx21/Exosc5/Wdr55/Ddx49/Ncl/Dimt1/Nol6/Rrp8/Znhit6/Imp4/Ddx54/Brix1/Exosc8/Rcl1/Lsm6/Tsr1/Rrs1/Pa2g4/Tbl3/Exosc1/Rpf2/Rpl7l1/Mphosph6/Rrp1/Exosc2/Pes1/Utp20/Heatr1/Npm1/Dkc1/Nop14/Sde2/Usp36/Wdr12/Pwp1/Nol9/T…
GO:0016072	rRNA metabolic process	239	0.543199	2.19982	1e-10	1e-10	2.10612e-08	3576	tags=49%, list=20%, signal=40%	Bop1/Polr1e/Utp18/Bysl/Rrp1b/Rrp12/Mrto4/Eif6/Nhp2/Ebna1bp2/Wdr18/Wdr75/Nat10/Ftsj3/Fbl/Rrp9/Mphosph10/Wdr46/Mak16/Gar1/Wdr74/Rrp7a/Isg20/Polr1b/Ppan/Utp14b/Exosc4/Bud23/Rrp15/Nop2/Lyar/Polr1a/Rsl1d1/Pop7/Ddx56/Ddx21/Exosc5/Wdr55/Ddx49/Ncl/Dimt1/Nol6/Rrp8/Znhit6/Imp4/Ddx54/Brix1/Exosc8/Rcl1/Polr2e/Lsm6/Tsr1/Rrs1/Pa2g4/Tbl3/Exosc1/Rpf2/Rpl7l1/Mphosph6/Smarca4/Rrp1/Exosc2/Pes1/Utp20/Heatr1/Npm1/Dkc…
GO:0034470	ncRNA processing	388	0.491069	2.11265	1e-10	1e-10	2.10612e-08	4071	tags=46%, list=23%, signal=36%	Trmt61a/Bop1/Utp18/Bysl/Rrp1b/Rrp12/Pusl1/Mrto4/Eif6/Nhp2/Ebna1bp2/Wdr18/Wdr75/Nat10/Yrdc/Pop1/Ftsj3/Fbl/Rrp9/Mphosph10/Wdr46/Mak16/Gar1/Wdr74/Rrp7a/Isg20/Nsun2/Ppan/Utp14b/Exosc4/Bud23/Rrp15/Ints2/Pus7/Nop2/Lyar/Rsl1d1/Pop7/Ddx56/Spout1/Ddx21/Exosc5/Wdr55/Trmt6/Ddx49/Srsf3/Ncl/Dimt1/Nol6/Rrp8/Elp6/Znhit6/Imp4/Ddx54/Brix1/Exosc8/Ctu2/Rcl1/Lsm6/Tsr1/Kti12/Rrs1/Pa2g4/Tbl3/Exosc1/Rpf2/Rpl7l1/Mphosph…
GO:0002443	leukocyte mediated immunity	337	-0.614609	-1.96161	1e-10	1e-10	2.10612e-08	2460	tags=34%, list=14%, signal=30%	Myo1g/Rab27a/Chga/H2-Q7/Rasgrp1/Fgr/Shld1/H2-D1/Clec2d/Cr2/Stap1/Kdm5d/Ticam2/Hfe/Arrb2/Bcl3/B2m/Serping1/Tlr2/Lag3/Adora2b/Lyn/Il7r/Il21r/Klrk1/Xcl1/Tap1/Tnfsf13/Dennd1b/Unc93b1/Plcg2/Stat5a/Vsir/Klrb1a/Fcgr3/Cplx2/Gab2/Tlr4/Lat2/Ncf1/Slamf9/H2-DMa/Cd55/Traf3ip2/Tlr3/P2rx7/Nlrp3/Ptpn6/Slfn2/Trem2/Irf7/C2/Icosl/C1qa/Syk/C1qc/Csf2rb2/C1qb/C1ra/Stxbp2/Cd46/Tyrobp/H2-Ab1/H2-Q6/Fcer1g/C1s1/H2-T23/Pik…
GO:0002449	lymphocyte mediated immunity	255	-0.618743	-1.95718	1e-10	1e-10	2.10612e-08	2460	tags=33%, list=14%, signal=29%	Myo1g/Rab27a/H2-Q7/Rasgrp1/Shld1/H2-D1/Clec2d/Cr2/Kdm5d/Hfe/Arrb2/Bcl3/B2m/Serping1/Lag3/Il7r/Il21r/Klrk1/Xcl1/Tap1/Tnfsf13/Dennd1b/Unc93b1/Stat5a/Vsir/Klrb1a/Fcgr3/H2-DMa/Cd55/Traf3ip2/P2rx7/Nlrp3/Ptpn6/Slfn2/Trem2/Irf7/C2/Icosl/C1qa/C1qc/Csf2rb2/C1qb/C1ra/Cd46/H2-Ab1/H2-Q6/Fcer1g/C1s1/H2-T23/Pik3r6/Pirb/Il23a/Batf/Ahr/H2-T24/Coro1a/Il1b/Nckap1l/Fgl2/Cd24a/H2-Q4/Mill2/Cfh/Inpp5d/Il2rb/Cd74/Lilrb…
GO:0046651	lymphocyte proliferation	293	-0.599056	-1.90227	1e-10	1e-10	2.10612e-08	2666	tags=35%, list=15%, signal=30%	Pde5a/Vav3/Mef2c/Malt1/Stat5b/Prkcq/Ccr7/Pla2g2d/Aif1/H2-Q7/Rasgrp1/Rasal3/Sh3rf1/Lipa/H2-D1/Cr2/Fyn/Tyk2/Prlr/Lyn/Il7r/Gja1/Cd86/Twsg1/Lst1/Cxcl12/Bmp4/Sox11/Xcl1/Pkn1/Stat5a/Mzb1/Lmo1/Vsir/H2-DMb1/Irf1/Gpnmb/Tlr4/Cd151/Satb1/Cd55/P2rx7/Flt3l/Ptpn6/Slfn2/Icosl/Syk/Csf1r/Lrrc32/Cd37/Irgm1/Gpr183/Tnfsf9/Cd46/Tyrobp/Cd180/H2-Q6/Tnfrsf21/H2-T23/Cd38/Tnfrsf13b/Laptm5/Itgb2/Il10/Il23a/Il15/Dock8/Cd274…
GO:0008380	RNA splicing	406	0.438331	1.90043	1e-10	1e-10	2.10612e-08	4585	tags=48%, list=26%, signal=36%	Rrp1b/Zpr1/Nol3/Jmjd6/Snrpa1/Ybx1/Ivns1abp/Taf10/Ppil1/Prmt1/Prdx6/Usp39/Prpf31/Snrpd1/Gemin5/Pus7/Txnl4a/Sf3b5/Strap/Thoc6/C1qbp/Lsm4/Wdr77/Srsf3/Alyref/Ncl/Cactin/Srsf2/Lsm6/Tssc4/Lsm3/Srsf7/Supt20/Cdk12/U2af1/Ptbp1/Magoh/Taf12/Eif4a3/Ncbp1/Phf5a/Srsf10/Aff2/Eif1/Prmt5/Fastk/Npm1/Lsm2/Gemin6/Rbm14/Snrpd3/Rbm28/Snrpb/Sde2/Sap18b/Rbm3/Magohb/Zfp326/Ddx1/Supt3/Gemin7/Hnrnpu/Hnrnpul2/Srpk1/Zrsr2/Sm…
GO:0002250	adaptive immune response	381	-0.579553	-1.86774	1e-10	1e-10	2.10612e-08	2270	tags=33%, list=13%, signal=29%	Pik3cd/Prkcq/Ccr7/Myo1g/Rab27a/H2-Q7/Shld1/H2-D1/Cracr2a/Cr2/Fyn/Orai1/Kdm5d/Tyk2/Hfe/Cd247/Bcl3/B2m/Serping1/Mfsd6/Lag3/Stat4/Lyn/Il7r/Il21r/Notch1/Rnf125/Cd86/Klrk1/Mcoln1/Xcl1/Tap1/Pkn1/Tnfsf13/Dennd1b/Unc93b1/Il33/Vsir/H2-DMb1/Fcgr3/Il18bp/Irf1/Lat2/C3ar1/Clec4d/H2-DMa/Cd55/Hlx/Traf3ip2/P2rx7/Mcoln2/Nlrp3/Ptpn6/Dclre1c/Slfn2/Trem2/Irf7/C2/Icosl/C1qa/Syk/C1qc/Csf2rb2/C1qb/C1ra/Gpr183/Cd46/H2-A…
GO:0002764	immune response-regulating signaling pathway	410	-0.568478	-1.8364	1e-10	1e-10	2.10612e-08	2686	tags=31%, list=15%, signal=27%	Casp1/Nop53/Vav3/Mef2c/Rnf31/Irf2/Malt1/Peli3/Ccr7/Pde4b/Myo1g/Gpatch3/H2-Q7/Slc46a2/Nr1h3/Lipa/Cmklr1/H2-D1/Lamp2/Fyn/Stap1/Colec12/Rab11fip2/Ticam2/Cd247/Arrb2/Oasl1/Tlr2/Lyn/Ifi204/Slc15a2/Rnf125/Cd86/Klrk1/Lgr4/Dennd1b/Nmi/Unc93b1/Plcg2/Aim2/Dhx58/Trim25/Zc3hav1/Nfam1/Irf1/Slc15a3/Tlr4/Lat2/Igtp/C3ar1/Casp4/Clec4d/Cav1/Fbxl2/Ifih1/Tlr3/Mndal/Nlrp3/Tril/Ptpn6/Trem2/Irf7/Ubash3a/Icosl/Syk/Oas1a…
GO:0002757	immune response-activating signaling pathway	402	-0.567407	-1.83113	1e-10	1e-10	2.10612e-08	2686	tags=31%, list=15%, signal=27%	Casp1/Nop53/Vav3/Mef2c/Rnf31/Irf2/Malt1/Peli3/Ccr7/Pde4b/Myo1g/Gpatch3/H2-Q7/Slc46a2/Nr1h3/Lipa/Cmklr1/H2-D1/Lamp2/Fyn/Stap1/Colec12/Rab11fip2/Ticam2/Cd247/Arrb2/Oasl1/Tlr2/Lyn/Ifi204/Slc15a2/Rnf125/Cd86/Klrk1/Lgr4/Dennd1b/Nmi/Unc93b1/Plcg2/Aim2/Dhx58/Trim25/Zc3hav1/Nfam1/Irf1/Slc15a3/Tlr4/Lat2/Igtp/C3ar1/Casp4/Cav1/Fbxl2/Ifih1/Tlr3/Mndal/Nlrp3/Tril/Ptpn6/Trem2/Irf7/Ubash3a/Icosl/Syk/Oas1a/Ly96/I…
GO:0045087	innate immune response	743	-0.540532	-1.75817	1e-10	1e-10	2.10612e-08	2396	tags=30%, list=13%, signal=27%	H2-Q7/Rasgrp1/Slc46a2/Nr1h3/Wfdc17/Fgr/Zfp809/Shfl/H2-D1/Clec2d/Lamp2/Ccl9/Cr2/Fyn/Vnn1/Trafd1/Isg15/Colec12/Tyk2/Rab11fip2/Ticam2/Trim5/Axl/Arrb2/Rab43/B2m/Serping1/Oasl1/Tlr2/Lag3/Parp9/Lyn/Gsn/Ikbke/Clec4a3/Ifi204/Slc15a2/Ifitm6/Rnf125/Cd86/Klrk1/Xcl1/Grn/Tap1/Lgr4/Trim14/Usp27x/Nmi/Unc93b1/Plcg2/Trim6/Map3k5/Aim2/Dhx58/Apobec3/Stat5a/Trim25/Zc3hav1/Il34/Dapk1/Znfx1/Pml/Trim12c/Klrb1a/Masp1/Ir…
GO:0042110	T cell activation	519	-0.543155	-1.75791	1e-10	1e-10	2.10612e-08	2574	tags=29%, list=14%, signal=25%	Malt1/Mafb/Stat5b/Cdk6/Prkcq/Atf2/Ccr7/Pla2g2d/Aif1/Rab27a/H2-Q7/Rasgrp1/Slc46a2/Zmiz1/Rasal3/Sh3rf1/Lipa/H2-D1/Cracr2a/Prex1/Fyn/Vnn1/Gli3/Tyk2/Zc3h8/Hfe/Ephb4/Sp3/Bcl3/B2m/Lag3/Stat4/Zfp608/Zeb1/Gsn/Il7r/Gja1/Cd86/Twsg1/Smarca2/Cxcl12/Bmp4/Psap/Itpkb/Xcl1/Smad3/Patz1/Hs1bp3/Zfp36l1/Stat5a/Lmo1/Vsir/H2-DMb1/Irf1/Gpnmb/Sh2b3/Cd151/Igtp/Clec4d/Slamf9/Satb1/H2-DMa/Cd55/Hlx/Traf3ip2/Cav1/P2rx7/Nlrp3…
GO:0050778	positive regulation of immune response	619	-0.540376	-1.7549	1e-10	1e-10	2.10612e-08	2692	tags=32%, list=15%, signal=28%	Tap2/Casp1/Nop53/Vav3/Mef2c/Mr1/Rnf31/Irf2/Malt1/Stat5b/Peli3/Prkcq/Cfp/Ccr7/Pde4b/Myo1g/Gpatch3/H2-Q7/Rasgrp1/Slc46a2/Nr1h3/Shld1/Lipa/Cmklr1/H2-D1/Lamp2/Gsdme/Cr2/Fyn/Stap1/Colec12/Tyk2/Rab11fip2/Ticam2/Hfe/Cd247/Trim5/Arrb2/B2m/Serping1/Oasl1/Tlr2/Lag3/Parp9/Lyn/Ikbke/Ifi204/Slc15a2/Rnf125/Cd86/Klrk1/Xcl1/Tnfsf13/Lgr4/Dennd1b/Usp27x/Nmi/Unc93b1/Plcg2/Trim6/Il33/Aim2/Dhx58/Stat5a/Trim25/Zc3hav1…
GO:0009617	response to bacterium	543	-0.537079	-1.74017	1e-10	1e-10	2.10612e-08	2202	tags=31%, list=12%, signal=28%	Cr2/Shpk/Isg15/Scd1/Stap1/Colec12/Ticam2/Trim5/Shc1/Axl/Bcl3/B2m/Prlr/Tlr2/Lyn/Il7r/Abcd2/Ifi204/Slc15a2/Acp5/Cd86/Klrk1/Ppl/Grn/BC018473/Sash1/Sbno2/Psmb9/Plcg2/Trim6/Dhx58/Tmem229b/Ly6a/Emilin2/Znfx1/Trim12c/Zfp36/Tmem255a/Epha2/Herc6/Fuca2/Trim30d/Amy1/Ppnr/Slc22a5/Tlr4/Pld1/Igtp/Lyz2/Ncf1/Notch2/Gpc3/Wnt5a/Trim12a/Casp4/Clec4d/Slamf9/Ncf2/Ociad2/Nfib/Cd55/Ifi44/Irf5/Scarb1/Cav1/P2rx7/Nlrp3/Sp…
GO:0002252	immune effector process	539	-0.536157	-1.73562	1e-10	1e-10	2.10612e-08	2129	tags=29%, list=12%, signal=27%	Stap1/Kdm5d/Ticam2/Hfe/Axl/Arrb2/Bcl3/B2m/Serping1/Tlr2/Lag3/Stat4/Adora2b/Lyn/Il7r/Il21r/Acp5/Cd86/Klrk1/Ppl/Xcl1/Grn/Tap1/Dock10/Pkn1/Tnfsf13/Dennd1b/Sbno2/Nmi/Unc93b1/Plcg2/Trim6/Il33/Dhx58/Stat5a/Mzb1/Vsir/Klrb1a/Gprc5b/H2-DMb1/Fcgr3/Cplx2/Itm2a/Masp1/Irf1/Gab2/Tlr4/Dll1/Lat2/Ncf1/Notch2/Wnt5a/Casp4/Clec4d/Slamf9/Tek/H2-DMa/Cd55/Hlx/Irf5/Traf3ip2/Tlr3/P2rx7/Nlrp3/Tril/Ptpn6/Slfn2/Trem2/Irf7/C…
GO:0050776	regulation of immune response	756	-0.532821	-1.73424	1e-10	1e-10	2.10612e-08	2692	tags=31%, list=15%, signal=28%	Tap2/Casp1/Nop53/Vav3/Mef2c/Mr1/Rnf31/Irf2/Malt1/Myo1f/Stat5b/Peli3/Sppl2a/Prkcq/Cfp/Ccr7/Pla2g2d/Pde4b/Ptprd/Myo1g/Gpatch3/H2-Q7/Rasgrp1/Slc46a2/Nr1h3/Fgr/Shld1/Lipa/Cmklr1/H2-D1/Clec2d/Lamp2/Gsdme/Cr2/Fyn/Trafd1/Isg15/Stap1/Colec12/Tyk2/Rab11fip2/Ticam2/Hfe/Cd247/Trim5/Arrb2/B2m/Serping1/Oasl1/Tlr2/Lag3/Parp9/Lyn/Il7r/Ikbke/Ifi204/Slc15a2/Rnf125/Cd86/Klrk1/Ppl/Xcl1/Grn/Tap1/Smad3/Pkn1/Tnfsf13/L…
GO:0046649	lymphocyte activation	721	-0.532804	-1.73383	1e-10	1e-10	2.10612e-08	2574	tags=29%, list=14%, signal=25%	Malt1/Mafb/Stat5b/Cdk6/Pik3cd/Prkcq/Atf2/Ccr7/Pla2g2d/Aif1/Rab27a/H2-Q7/Rasgrp1/Slc46a2/Dock11/Mertk/Zmiz1/Fgr/Hdac7/Rasal3/Shld1/Sh3rf1/Lipa/H2-D1/Cracr2a/Prex1/Cr2/Fyn/Vnn1/Fbxo7/Gli3/Tyk2/Zc3h8/Ticam2/Hfe/Ephb4/Axl/Sp3/Polm/Bcl3/B2m/Prlr/Lag3/Stat4/Zfp608/Zeb1/Lyn/Gsn/Il7r/Gja1/Cd86/Klrk1/Twsg1/Lst1/Smarca2/Cxcl12/Bmp4/Psap/Sox11/Itpkb/Xcl1/Smad3/Dock10/Patz1/Pkn1/Tnfsf13/Hs1bp3/Atp11c/Plcg2/Z…
GO:0001817	regulation of cytokine production	691	-0.523913	-1.70325	1e-10	1e-10	2.10612e-08	2116	tags=26%, list=12%, signal=24%	Tyk2/Arnt/Ticam2/Hfe/Axl/Arrb2/Bcl3/B2m/Tlr2/Lag3/Adora2b/Fbln1/Lyn/Met/Ikbke/Abcd2/Ifi204/Acp5/Rnf125/Klrk1/Trib2/Twsg1/Xcl1/Smad3/Patz1/Lgr4/Dennd1b/Agtr1a/Cd300ld/Nmi/Unc93b1/Zbtb20/Plcg2/Zbtb37/Trim6/Il33/Aim2/Dhx58/Stat5a/Zfp287/Zc3hav1/Vsir/Pml/Gprc5b/Fcgr3/Nfam1/Irf1/Plcb1/Gpnmb/Zfp36/Epha2/Cd200/Snai2/Akap12/Tlr4/Dll1/Rbm47/Prg4/Igtp/C3ar1/Wnt5a/Casp4/Pla2r1/Tek/Ccl4/Cd55/Irf5/Xaf1/Ifih1/…
GO:0001816	cytokine production	758	-0.520742	-1.69469	1e-10	1e-10	2.10612e-08	2116	tags=26%, list=12%, signal=24%	Tyk2/Arnt/Ticam2/Hfe/Cd247/Axl/Arrb2/Bcl3/B2m/Tlr2/Lag3/Adora2b/Fbln1/Lyn/Met/Ikbke/Abcd2/Ifi204/Acp5/Notch1/Rnf125/Klrk1/Trib2/Twsg1/Xcl1/Smad3/Patz1/Lgr4/Dennd1b/Agtr1a/Cd300ld/Nmi/Unc93b1/Zbtb20/Plcg2/Zbtb37/Trim6/Il33/Aim2/Dhx58/Stat5a/Zfp287/Zc3hav1/Vsir/Pml/Gprc5b/Fcgr3/Nfam1/Irf1/Plcb1/Gpnmb/Zfp36/Epha2/Cd200/Snai2/Irf9/Akap12/Tlr4/Dll1/Rbm47/Prg4/Igtp/Notch2/C3ar1/Wnt5a/Casp4/Pla2r1/Slamf…
GO:0050865	regulation of cell activation	564	-0.528651	-1.71332	1.0015e-10	1.0015e-10	2.10612e-08	2396	tags=29%, list=13%, signal=26%	H2-Q7/Rasgrp1/Slc46a2/Nr1h3/Mertk/Zmiz1/Fgr/Rasal3/Shld1/Sh3rf1/H2-D1/C1qtnf1/Shpk/Vnn1/Fbxo7/Gli3/Ddr2/Stap1/Gpr137b/Tyk2/Zc3h8/Ticam2/Hfe/Ephb4/Axl/Cygb/B2m/Prlr/Lag3/Zfp608/Zeb1/Rps6ka1/Lyn/Il7r/Cd86/Klrk1/Ubash3b/Twsg1/Lst1/Rian/Smarca2/Bmp4/Sox11/Itpkb/Xcl1/Grn/Pkn1/Tnfsf13/Pear1/Atp11c/Zfp36l1/Il33/Stat5a/Mzb1/Emilin2/Lmo1/Vsir/H2-DMb1/Nfam1/Irf1/Gpnmb/Cd200/Alox12/Sh2b3/Tlr4/Wnt5a/Clec4d/H…
GO:0098609	cell-cell adhesion	737	-0.494173	-1.60732	2.70842e-10	2.70842e-10	5.45842e-08	2575	tags=26%, list=14%, signal=23%	Lamb1/Malt1/Pip5k1c/Stat5b/Amigo1/Robo4/Camsap3/Prkcq/Spint2/Ccr7/Pla2g2d/Aif1/Ptprd/Rap1gap/Stk10/H2-Q7/Rasgrp1/Zmiz1/Rasal3/Itga8/H2-D1/Lama3/C1qtnf1/Zdhhc2/Vnn1/Gli3/Gnas/Tyk2/Zc3h8/Hfe/Ephb4/Shc1/Tspan9/Itga2b/Sdk2/B2m/Lag3/Zfp608/Lyn/Il7r/Notch1/Cd86/Slitrk1/Ubash3b/Twsg1/Itga1/Taok2/Smarca2/Cxcl12/Bmp4/Itpkb/Itga3/Xcl1/P2ry12/Pear1/Zfp36l1/Boc/Col13a1/Stat5a/Emilin2/Vsir/Igdcc4/H2-DMb1/Irf1…
GO:0035456	response to interferon-beta	57	-0.804793	-2.19151	3.03824e-10	3.03824e-10	5.87819e-08	1889	tags=58%, list=11%, signal=52%	Ikbke/Ifi204/Ifitm6/Gm4841/Trim6/Aim2/Irf1/Igtp/Xaf1/Mndal/Oas1a/Irgm2/Irgm1/Oas1g/Ifi47/Oas1c/Gbp7/Ifi203/Gbp2/Ifitm1/F830016B08Rik/Ifit1/Gbp3/Ifit3/Iigp1/Ifi207/Ifi208/Gbp6/Ifi206/Ifi213/Tgtp2/Ifi209/Tgtp1
GO:0032943	mononuclear cell proliferation	299	-0.58871	-1.87258	4.27713e-10	4.27713e-10	7.95684e-08	2691	tags=35%, list=15%, signal=30%	Bcl2l1/Pde5a/Vav3/Mef2c/Malt1/Stat5b/Prkcq/Ccr7/Pla2g2d/Aif1/H2-Q7/Rasgrp1/Rasal3/Sh3rf1/Lipa/H2-D1/Cr2/Fyn/Tyk2/Prlr/Lyn/Il7r/Gja1/Cd86/Twsg1/Lst1/Cxcl12/Bmp4/Sox11/Xcl1/Pkn1/Stat5a/Mzb1/Lmo1/Vsir/H2-DMb1/Irf1/Gpnmb/Tlr4/Cd151/Satb1/Cd55/P2rx7/Flt3l/Ptpn6/Slfn2/Icosl/Syk/St6gal1/Csf1r/Lrrc32/Cd37/Irgm1/Gpr183/Tnfsf9/Cd46/Tyrobp/Cd180/H2-Q6/Tnfrsf21/H2-T23/Cd38/Tnfrsf13b/Laptm5/Itgb2/Il10/Il23a/I…
GO:0032103	positive regulation of response to external stimulus	572	-0.52022	-1.68747	4.75702e-10	4.75702e-10	8.52183e-08	1958	tags=27%, list=11%, signal=25%	Oasl1/Tlr2/Lag3/Adora2b/Parp9/Lyn/Met/Cxcl14/Ikbke/Ptn/Ifi204/Slc15a2/Vegfc/Rnf125/Cd86/Klrk1/Cxcl12/Xcl1/Grn/Smad3/Lgr4/P2ry12/Sash1/Usp27x/Nmi/Unc93b1/Plcg2/Trim6/Il33/Aim2/Dhx58/Stat5a/Trim25/Emilin2/Zc3hav1/Il34/Znfx1/Trim12c/Gprc5b/Fcgr3/Smoc2/Irf1/Trim30d/Snai2/Slc15a3/Tlr4/Rbm47/Igtp/C3ar1/Wnt5a/Trim12a/Casp4/Vtn/Cav1/Fbxl2/Ifih1/Tlr3/Mndal/Sema5a/Nlrp3/Tril/Ccl3/Trem2/Irf7/Syk/Oas1a/Csf1r…
GO:0045089	positive regulation of innate immune response	331	-0.57561	-1.83806	5.1475e-10	5.1475e-10	8.89201e-08	2122	tags=29%, list=12%, signal=26%	Colec12/Rab11fip2/Ticam2/Trim5/Arrb2/Oasl1/Tlr2/Lag3/Parp9/Lyn/Ikbke/Ifi204/Slc15a2/Rnf125/Cd86/Klrk1/Xcl1/Lgr4/Usp27x/Nmi/Unc93b1/Plcg2/Trim6/Aim2/Dhx58/Stat5a/Trim25/Zc3hav1/Znfx1/Trim12c/Irf1/Trim30d/Slc15a3/Tlr4/Rbm47/Igtp/Wnt5a/Trim12a/Casp4/Cav1/Fbxl2/Ifih1/Tlr3/Mndal/Nlrp3/Tril/Trem2/Irf7/Syk/Oas1a/Ly96/Irgm2/Appl2/Irgm1/Oas1g/Tyrobp/Trim30a/H2-Q6/Tifa/Oas1c/H2-T23/Spi1/Clec4n/Gbp7/Clec4e/…
GO:0002831	regulation of response to biotic stimulus	469	-0.537908	-1.74061	6.49492e-10	6.49492e-10	1.08327e-07	2396	tags=30%, list=13%, signal=27%	H2-Q7/Rasgrp1/Slc46a2/Nr1h3/Fgr/H2-D1/Clec2d/Lamp2/Gsdme/Trafd1/Isg15/Colec12/Rab11fip2/Ticam2/Trim5/Arrb2/Serping1/Oasl1/Tlr2/Lag3/Parp9/Lyn/Ikbke/Ifi204/Slc15a2/Rnf125/Cd86/Klrk1/Ppl/Xcl1/Grn/Tap1/Lgr4/Sash1/Usp27x/Nmi/Unc93b1/Plcg2/Trim6/Aim2/Dhx58/Apobec3/Stat5a/Trim25/Emilin2/Zc3hav1/Dapk1/Znfx1/Pml/Trim12c/Klrb1a/Irf1/Trim30d/Slc15a3/Tlr4/Rbm47/Igtp/Ncf1/Wnt5a/Trim12a/Casp4/Trim21/Cd55/Traf…
GO:0002703	regulation of leukocyte mediated immunity	220	-0.624673	-1.9567	8.38253e-10	8.38253e-10	1.3515e-07	2396	tags=34%, list=13%, signal=30%	H2-Q7/Rasgrp1/Fgr/Shld1/H2-D1/Clec2d/Cr2/Stap1/Ticam2/Hfe/Arrb2/B2m/Tlr2/Lag3/Adora2b/Lyn/Il7r/Klrk1/Xcl1/Tap1/Tnfsf13/Dennd1b/Plcg2/Stat5a/Vsir/Klrb1a/Fcgr3/Gab2/Tlr4/Cd55/Tlr3/P2rx7/Nlrp3/Ptpn6/Trem2/Syk/Stxbp2/Cd46/Tyrobp/H2-Q6/Fcer1g/H2-T23/Pik3r6/Spi1/Itgb2/Il23a/Cx3cr1/Ahr/H2-T24/Il1b/Nckap1l/Cd24a/H2-Q4/Mill2/Lilrb4a/Rac2/Ptprc/Fcgr2b/Nod2/Nppc/Cd84/Rsad2/Ccr2/Sash3/Cadm1/Ptafr/Fcgr1/Cd300…
GO:0070661	leukocyte proliferation	331	-0.572521	-1.82819	9.0216e-10	9.0216e-10	1.40451e-07	1959	tags=29%, list=11%, signal=26%	Prlr/Stat4/Lyn/Il7r/Gja1/Cd86/Twsg1/Lst1/Cxcl12/Bmp4/Sox11/Xcl1/Pkn1/Il33/Stat5a/Mzb1/Lmo1/Vsir/Il34/H2-DMb1/Irf1/Gpnmb/Tlr4/Cd151/Satb1/Cd55/P2rx7/Flt3l/Ptpn6/Slfn2/Trem2/Icosl/Syk/St6gal1/Csf1r/Csf2rb2/Lrrc32/Cd37/Irgm1/Gpr183/Tnfsf9/Cd46/Enpp3/Clu/Tyrobp/Cd180/H2-Q6/Tnfrsf21/H2-T23/Cd38/Tnfrsf13b/Laptm5/Itgb2/Il10/Il23a/Il15/Dock8/Cd274/Ahr/Coro1a/Il1b/Nckap1l/Cd24a/H2-Q4/Fgf10/Card11/Inpp5d/C…
GO:0070663	regulation of leukocyte proliferation	253	-0.598414	-1.89026	9.29205e-10	9.29205e-10	1.40451e-07	1827	tags=30%, list=10%, signal=27%	Cd86/Twsg1/Lst1/Bmp4/Sox11/Xcl1/Pkn1/Il33/Stat5a/Mzb1/Lmo1/Vsir/Il34/H2-DMb1/Irf1/Gpnmb/Tlr4/Cd55/Flt3l/Ptpn6/Icosl/Syk/St6gal1/Csf1r/Csf2rb2/Lrrc32/Cd37/Irgm1/Gpr183/Tnfsf9/Cd46/Enpp3/Tyrobp/H2-Q6/Tnfrsf21/H2-T23/Cd38/Tnfrsf13b/Laptm5/Il10/Il23a/Il15/Cd274/Ahr/Coro1a/Il1b/Nckap1l/Cd24a/H2-Q4/Fgf10/Card11/Inpp5d/Cd74/Lilrb4a/Rac2/Csf2rb/Cd22/Ptprc/Fcgr2b/H2-Aa/Itgal/Ccr2/Kitl/Sash3/Ccl12/H2-DMb2/…
GO:0051607	defense response to virus	256	-0.603225	-1.90904	9.92091e-10	9.92091e-10	1.45412e-07	1958	tags=32%, list=11%, signal=29%	Oasl1/Parp9/Ifi204/Ifitm6/Cd86/Slfn8/Mov10/Usp27x/Unc93b1/Trim6/Il33/Aim2/Dhx58/Apobec3/Pmaip1/Trim25/Zc3hav1/Znfx1/Pml/Trim12c/Irf1/Trim30d/Serinc3/Igtp/Il10rb/Trim12a/Trim21/Irf5/Traf3ip2/Ifih1/Tlr3/Mndal/Nlrp3/Pde12/Dtx3l/Irf7/Cxcl9/Oas1a/Cd37/Apobec1/Irgm2/Stat2/Ifit2/Cxcl10/Irgm1/Oas1g/Tagap/Trim30a/Oas1c/Rnasel/Oasl2/Il23a/Il15/Gbp7/Trim34a/Il1b/Ifi203/Rtp4/Fgl2/Ddx60/Itgax/Ifitm1/Ifit3b/Pt…
GO:0002833	positive regulation of response to biotic stimulus	352	-0.562386	-1.80629	1.09172e-09	1.09172e-09	1.55308e-07	2396	tags=31%, list=13%, signal=28%	H2-Q7/Rasgrp1/Slc46a2/Nr1h3/H2-D1/Lamp2/Gsdme/Colec12/Rab11fip2/Ticam2/Trim5/Arrb2/Oasl1/Tlr2/Lag3/Parp9/Lyn/Ikbke/Ifi204/Slc15a2/Rnf125/Cd86/Klrk1/Xcl1/Grn/Lgr4/Sash1/Usp27x/Nmi/Unc93b1/Plcg2/Trim6/Aim2/Dhx58/Stat5a/Trim25/Emilin2/Zc3hav1/Znfx1/Trim12c/Irf1/Trim30d/Slc15a3/Tlr4/Rbm47/Igtp/Wnt5a/Trim12a/Casp4/Cav1/Fbxl2/Ifih1/Tlr3/Mndal/Nlrp3/Tril/Trem2/Irf7/Syk/Oas1a/Ly96/Irgm2/Appl2/Irgm1/Oas1g…
GO:0002697	regulation of immune effector process	352	-0.561818	-1.80447	1.32155e-09	1.32155e-09	1.82632e-07	2129	tags=31%, list=12%, signal=28%	Stap1/Ticam2/Hfe/Axl/Arrb2/B2m/Serping1/Tlr2/Lag3/Adora2b/Lyn/Il7r/Acp5/Cd86/Klrk1/Ppl/Xcl1/Grn/Tap1/Pkn1/Tnfsf13/Dennd1b/Plcg2/Trim6/Il33/Dhx58/Stat5a/Mzb1/Vsir/Klrb1a/Gprc5b/H2-DMb1/Fcgr3/Masp1/Irf1/Gab2/Tlr4/Ncf1/Wnt5a/Casp4/Tek/Cd55/Hlx/Irf5/Tlr3/P2rx7/Nlrp3/Tril/Ptpn6/Trem2/Syk/Cd37/Appl2/Colec11/Stxbp2/Cd46/Enpp3/Tyrobp/H2-Q6/Fcer1g/H2-T23/Pik3r6/Laptm5/Spi1/Itgb2/Il10/Il23a/Cx3cr1/Ahr/H2-T…
GO:0002253	activation of immune response	461	-0.534896	-1.73004	1.45134e-09	1.45134e-09	1.94998e-07	2686	tags=32%, list=15%, signal=28%	Casp1/Nop53/Vav3/Mef2c/Rnf31/Irf2/Malt1/Peli3/Cfp/Ccr7/Pde4b/Myo1g/Gpatch3/H2-Q7/Slc46a2/Nr1h3/Lipa/Cmklr1/H2-D1/Lamp2/Cr2/Fyn/Stap1/Colec12/Rab11fip2/Ticam2/Cd247/Trim5/Arrb2/Serping1/Oasl1/Tlr2/Lyn/Ifi204/Slc15a2/Rnf125/Cd86/Klrk1/Lgr4/Dennd1b/Nmi/Unc93b1/Plcg2/Aim2/Dhx58/Trim25/Zc3hav1/Znfx1/Trim12c/Nfam1/Masp1/Irf1/Trim30d/Slc15a3/Tlr4/Lat2/Igtp/C3ar1/Trim12a/Casp4/Cd55/Cav1/Fbxl2/Ifih1/Tlr3/…
GO:0031347	regulation of defense response	682	-0.49718	-1.61627	1.81196e-09	1.81196e-09	2.36869e-07	2193	tags=26%, list=12%, signal=23%	Shpk/Trafd1/Isg15/Stap1/Colec12/Arnt/Rab11fip2/Ticam2/Trim5/Arrb2/Serping1/Oasl1/Tlr2/Lag3/Adora2b/Parp9/Lyn/Ikbke/Gja1/Ifi204/Slc15a2/Acp5/Rnf125/Cd86/Klrk1/Ppl/Xcl1/Grn/Tap1/Smad3/Lgr4/Sbno2/Usp27x/Nmi/Unc93b1/Plcg2/Trim6/Il33/Aim2/Dhx58/Apobec3/Stat5a/Dagla/Trim25/Emilin2/Zc3hav1/Mgll/Znfx1/Pml/Trim12c/Klrb1a/Gprc5b/Fcgr3/Irf1/Zfp36/Cd200/Trim30d/Adamts12/Slc15a3/Tlr4/Rbm47/Igtp/Ncf1/Wnt5a/Tri…
GO:0035458	cellular response to interferon-beta	49	-0.817982	-2.18221	2.18031e-09	2.18031e-09	2.77521e-07	1639	tags=57%, list=9%, signal=52%	Gm4841/Trim6/Aim2/Irf1/Igtp/Mndal/Oas1a/Irgm2/Irgm1/Oas1g/Ifi47/Oas1c/Gbp7/Ifi203/Gbp2/F830016B08Rik/Ifit1/Gbp3/Ifit3/Iigp1/Ifi207/Ifi208/Gbp6/Ifi206/Ifi213/Tgtp2/Ifi209/Tgtp1
GO:0031349	positive regulation of defense response	441	-0.534549	-1.73192	2.65088e-09	2.65088e-09	3.28767e-07	2129	tags=28%, list=12%, signal=25%	Stap1/Colec12/Rab11fip2/Ticam2/Trim5/Arrb2/Oasl1/Tlr2/Lag3/Adora2b/Parp9/Lyn/Ikbke/Gja1/Ifi204/Slc15a2/Rnf125/Cd86/Klrk1/Xcl1/Grn/Lgr4/Usp27x/Nmi/Unc93b1/Plcg2/Trim6/Il33/Aim2/Dhx58/Stat5a/Trim25/Emilin2/Zc3hav1/Znfx1/Trim12c/Gprc5b/Fcgr3/Irf1/Trim30d/Slc15a3/Tlr4/Rbm47/Igtp/Wnt5a/Trim12a/Casp4/Cav1/Fbxl2/Ifih1/Tlr3/Mndal/Nlrp3/Tril/Ccl3/Trem2/Irf7/Syk/Oas1a/Csf1r/Ctss/Ly96/Irgm2/Appl2/Irgm1/Oas1…
GO:0002694	regulation of leukocyte activation	514	-0.524453	-1.69747	2.90518e-09	2.90518e-09	3.51298e-07	2396	tags=28%, list=13%, signal=25%	H2-Q7/Rasgrp1/Slc46a2/Nr1h3/Mertk/Zmiz1/Fgr/Rasal3/Shld1/Sh3rf1/H2-D1/Shpk/Vnn1/Fbxo7/Gli3/Stap1/Gpr137b/Tyk2/Zc3h8/Ticam2/Hfe/Ephb4/Axl/B2m/Prlr/Lag3/Zfp608/Zeb1/Lyn/Il7r/Cd86/Klrk1/Twsg1/Lst1/Smarca2/Bmp4/Sox11/Itpkb/Xcl1/Grn/Pkn1/Tnfsf13/Atp11c/Zfp36l1/Il33/Stat5a/Mzb1/Lmo1/Vsir/H2-DMb1/Nfam1/Irf1/Gpnmb/Cd200/Sh2b3/Tlr4/Wnt5a/Clec4d/H2-DMa/Cd55/Hlx/Cav1/Nlrp3/Flt3l/Ptpn6/Sox13/Trem2/Icosl/Socs…
GO:0045088	regulation of innate immune response	390	-0.54973	-1.77406	3.22018e-09	3.22018e-09	3.79891e-07	2396	tags=31%, list=13%, signal=27%	H2-Q7/Rasgrp1/Slc46a2/Nr1h3/Fgr/H2-D1/Clec2d/Lamp2/Trafd1/Isg15/Colec12/Rab11fip2/Ticam2/Trim5/Arrb2/Serping1/Oasl1/Tlr2/Lag3/Parp9/Lyn/Ikbke/Ifi204/Slc15a2/Rnf125/Cd86/Klrk1/Xcl1/Grn/Tap1/Lgr4/Usp27x/Nmi/Unc93b1/Plcg2/Trim6/Aim2/Dhx58/Stat5a/Trim25/Zc3hav1/Znfx1/Trim12c/Klrb1a/Irf1/Trim30d/Slc15a3/Tlr4/Rbm47/Igtp/Ncf1/Wnt5a/Trim12a/Casp4/Trim21/Cav1/Fbxl2/Ifih1/Tlr3/Mndal/Nlrp3/Tril/Trem2/Irf7/S…
GO:0050670	regulation of lymphocyte proliferation	229	-0.607976	-1.91441	3.52812e-09	3.52812e-09	4.06308e-07	2666	tags=35%, list=15%, signal=30%	Pde5a/Vav3/Mef2c/Stat5b/Prkcq/Ccr7/Pla2g2d/Aif1/H2-Q7/Rasal3/Sh3rf1/H2-D1/Tyk2/Prlr/Lyn/Cd86/Twsg1/Lst1/Bmp4/Sox11/Xcl1/Pkn1/Stat5a/Mzb1/Lmo1/Vsir/H2-DMb1/Irf1/Gpnmb/Tlr4/Cd55/Flt3l/Ptpn6/Icosl/Syk/Csf1r/Lrrc32/Cd37/Irgm1/Gpr183/Tnfsf9/Cd46/Tyrobp/H2-Q6/Tnfrsf21/H2-T23/Cd38/Tnfrsf13b/Laptm5/Il10/Il23a/Il15/Cd274/Ahr/Coro1a/Il1b/Nckap1l/Cd24a/H2-Q4/Fgf10/Card11/Inpp5d/Cd74/Lilrb4a/Rac2/Cd22/Ptprc/…
GO:0042098	T cell proliferation	219	-0.612739	-1.91617	4.27232e-09	4.27232e-09	4.8057e-07	2574	tags=33%, list=14%, signal=29%	Malt1/Stat5b/Prkcq/Ccr7/Pla2g2d/Aif1/H2-Q7/Rasgrp1/Rasal3/Sh3rf1/Lipa/H2-D1/Fyn/Tyk2/Gja1/Cd86/Twsg1/Cxcl12/Bmp4/Xcl1/Stat5a/Lmo1/Vsir/H2-DMb1/Irf1/Gpnmb/Cd151/Satb1/Cd55/P2rx7/Ptpn6/Slfn2/Icosl/Syk/Lrrc32/Cd37/Irgm1/Tnfsf9/Cd46/H2-Q6/Tnfrsf21/H2-T23/Laptm5/Itgb2/Il23a/Il15/Dock8/Cd274/Coro1a/Il1b/Nckap1l/Cd24a/H2-Q4/Card11/Lilrb4a/Rac2/Slc11a1/Cxcr4/Dock2/Ptprc/H2-Aa/Itgal/Ebi3/Ccr2/Kitl/Sash3/H…
GO:0002460	adaptive immune response based on somatic recombination of immune receptors built from immunoglobulin superfamily domains	285	-0.578567	-1.83369	5.82628e-09	5.82628e-09	6.40472e-07	2506	tags=32%, list=14%, signal=28%	Mef2c/Mr1/Malt1/Prkcq/Ccr7/Myo1g/Rab27a/H2-Q7/Shld1/H2-D1/Cracr2a/Cr2/Kdm5d/Tyk2/Hfe/Bcl3/B2m/Serping1/Stat4/Il7r/Il21r/Notch1/Xcl1/Pkn1/Tnfsf13/Dennd1b/Unc93b1/Il33/Vsir/Fcgr3/Il18bp/Irf1/C3ar1/H2-DMa/Cd55/Hlx/Traf3ip2/P2rx7/Nlrp3/Ptpn6/Slfn2/Trem2/Irf7/C2/Icosl/C1qa/C1qc/Csf2rb2/C1qb/C1ra/Cd46/H2-Ab1/H2-Q6/Fcer1g/C1s1/H2-T23/Pirb/Clec4n/Il23a/Cd274/Batf/Ahr/H2-T24/Il1b/Nckap1l/Fgl2/Cd24a/H2-Q4/…
GO:0042273	ribosomal large subunit biogenesis	69	0.693416	2.33829	6.80818e-09	6.80818e-09	7.25335e-07	2930	tags=59%, list=16%, signal=50%	Bop1/Mrto4/Eif6/Nhp2/Nop16/Ebna1bp2/Noc2l/Ftsj3/Mak16/Wdr74/Ppan/Mrpl20/Rrp15/Nop2/Rsl1d1/Nle1/Mdn1/Znhit6/Brix1/Nip7/Rrs1/Rpf2/Rpl7l1/Pes1/Gtf3a/Npm1/Rplp0/Cinp/Pak1ip1/Zfp622/Wdr12/Nol9/Rpl10a/Heatr3/Las1l/Rpl11/Ddx18/Rpl14/Nifk/Sdad1/Gtpbp4
GO:0051249	regulation of lymphocyte activation	456	-0.533389	-1.72788	6.89818e-09	6.89818e-09	7.25335e-07	2666	tags=30%, list=15%, signal=26%	Pde5a/Vav3/Mef2c/Mmp14/Malt1/Stat5b/Prkcq/Ccr7/Pla2g2d/Aif1/H2-Q7/Rasgrp1/Slc46a2/Mertk/Zmiz1/Fgr/Rasal3/Shld1/Sh3rf1/H2-D1/Vnn1/Fbxo7/Gli3/Tyk2/Zc3h8/Ticam2/Hfe/Ephb4/Axl/B2m/Prlr/Lag3/Zfp608/Zeb1/Lyn/Il7r/Cd86/Twsg1/Lst1/Smarca2/Bmp4/Sox11/Itpkb/Xcl1/Pkn1/Tnfsf13/Atp11c/Zfp36l1/Stat5a/Mzb1/Lmo1/Vsir/H2-DMb1/Nfam1/Irf1/Gpnmb/Sh2b3/Tlr4/H2-DMa/Cd55/Hlx/Cav1/Nlrp3/Flt3l/Ptpn6/Sox13/Icosl/Socs1/Syk…
GO:0002699	positive regulation of immune effector process	232	-0.601935	-1.89182	7.68273e-09	7.68273e-09	7.87792e-07	2692	tags=39%, list=15%, signal=34%	Tap2/Casp1/Mr1/Malt1/Stat5b/Cfp/Ccr7/H2-Q7/Rasgrp1/Fgr/Shld1/H2-D1/Stap1/Ticam2/Hfe/B2m/Tlr2/Lag3/Adora2b/Cd86/Klrk1/Xcl1/Tnfsf13/Dennd1b/Plcg2/Trim6/Il33/Dhx58/Stat5a/Mzb1/Gprc5b/H2-DMb1/Fcgr3/Irf1/Gab2/Tlr4/Wnt5a/Casp4/Tek/Cd55/Hlx/Irf5/Tlr3/P2rx7/Nlrp3/Ptpn6/Trem2/Syk/Cd37/Appl2/Colec11/Stxbp2/Cd46/Enpp3/Tyrobp/H2-Q6/Fcer1g/H2-T23/Laptm5/Spi1/Itgb2/Il10/Il23a/H2-T24/Il1b/Cd24a/H2-Q4/Mill2/Nfkb…
GO:0001819	positive regulation of cytokine production	443	-0.526606	-1.70563	7.81791e-09	7.81791e-09	7.87792e-07	1733	tags=26%, list=10%, signal=24%	Xcl1/Smad3/Dennd1b/Agtr1a/Unc93b1/Zbtb20/Plcg2/Trim6/Il33/Aim2/Dhx58/Stat5a/Zc3hav1/Gprc5b/Fcgr3/Nfam1/Irf1/Plcb1/Cd200/Akap12/Tlr4/Rbm47/C3ar1/Wnt5a/Casp4/Pla2r1/Tek/Ccl4/Cd55/Irf5/Ifih1/Tlr3/Mndal/P2rx7/Mcoln2/Nlrp3/Ccl3/Cd34/Trem2/Irf7/Icosl/Syk/Oas1a/Csf1r/Ly96/Oas1g/Tslp/Tnfsf9/Cd46/Defb25/Clu/Tyrobp/H2-Q6/Oas1c/Fcer1g/H2-T23/Lum/Laptm5/Clec4n/Il10/Il23a/Il15/Clec4e/Il17d/Cd274/Batf/Il1b/Ifi…
GO:0042742	defense response to bacterium	220	-0.609223	-1.9083	8.1241e-09	8.1241e-09	8.01939e-07	2627	tags=38%, list=15%, signal=33%	Mr1/Rnf31/Myo1f/Peli3/Chga/H2-Q7/Wfdc17/Fgr/H2-D1/Isg15/Scd1/Colec12/Shc1/Bcl3/B2m/Tlr2/Il7r/Slc15a2/Acp5/Klrk1/Ppl/Grn/Emilin2/Znfx1/Epha2/Tlr4/Pld1/Igtp/Lyz2/Ncf1/Notch2/Casp4/Clec4d/Slamf9/P2rx7/Nlrp3/Trem2/Stab1/Syk/Oas1a/Irgm2/Irgm1/Oas1g/Tslp/Plac8/Defb25/Rnf213/H2-Q6/Oas1c/Fcer1g/H2-T23/Il10/Il23a/Gbp7/Clec4e/Mpeg1/Adamts4/Mmrn2/Il1b/H2-Q4/Gbp2/Nos2/C5ar1/Pglyrp1/Slc11a1/Naip2/Irf8/Gbp3/No…
GO:0140053	mitochondrial gene expression	164	0.543003	2.09645	9.18087e-09	9.18087e-09	8.88128e-07	3346	tags=48%, list=19%, signal=40%	Mrpl17/Mrps18b/Shmt2/Mrps6/Mrpl54/Mrpl12/Mrps16/Mrps7/Mrps34/Gadd45gip1/Mrpl20/Mrps12/Mrpl55/C1qbp/Mrpl49/Mrpl43/Tsfm/Tbrg4/Mrps26/Mrps25/Mrpl16/Mrps24/Aurkaip1/Rcc1l/Mrpl18/Mrpl38/Coa3/Mrps23/Mrpl53/Mrpl41/Uqcc2/Mpv17l2/Mrps28/Chchd1/Mrpl28/Mrpl34/Fastk/Mrpl15/Mrpl40/Mrpl22/Mrpl14/Mrps17/Mrps30/Dap3/Mrpl57/Mrpl21/Mrps14/Mrps15/Mrpl11/Trnt1/Mrpl2/Mrps11/Elac2/Ears2/Mtg2/Mrpl42/Slc25a33/Mrpl58/Mrp…
GO:0002521	leukocyte differentiation	594	-0.501046	-1.62705	9.83025e-09	9.83025e-09	9.32302e-07	2643	tags=29%, list=15%, signal=26%	Mef2c/Mmp14/Mr1/Fos/Malt1/Nr3c1/Mafb/Stat5b/Cdk6/Atf2/Ccr7/Pla2g2d/Rasgrp1/Slc46a2/Dock11/Mertk/Zmiz1/Hdac7/Sh3rf1/Lipa/Clec2d/Lbr/Ccl9/Cracr2a/Prex1/Cr2/Vnn1/Fbxo7/Gli3/Gnas/Gpr137b/Zc3h8/Axl/Sp3/Polm/Bcl3/B2m/Tlr2/Lag3/Stat4/Zfp608/Zeb1/Lyn/Il7r/Ifi204/Ubash3b/Smarca2/Ppargc1b/Bmp4/Psap/Itpkb/Dock10/Patz1/Hs1bp3/Gab3/Sbno2/Atp11c/Plcg2/Zfp36l1/Il33/Stat5a/Vsir/Il34/Itm2a/Nfam1/Irf1/Plcb1/Gab2/E…
GO:0044283	small molecule biosynthetic process	467	0.387211	1.67981	1.04183e-08	1.04183e-08	9.53289e-07	2515	tags=30%, list=14%, signal=27%	Adipoq/Aldoc/Fdps/Eno1/Dhcr24/Mif/Pgk1/Idi1/Cyp51/Fabp5/Tpi1/Pgam1/Msmo1/Ldha/Pkm/Erfe/Rbp4/Gapdh/Ass1/Hmgcs1/Mvd/Aldoa/Gck/Fads3/Dgat2/Mthfd1l/Pgp/Fdft1/Bcat1/Slc1a3/Asns/Agt/Insig1/Ptgs2/Plod2/Mvk/C1qtnf3/Myh9/Phgdh/Ptgis/Eif6/Bmp6/Hmgcr/Hsd17b7/Stard4/Gpi1/G6pc3/Nfkb1/Ebp/Shmt2/Sesn2/Slc39a14/Acot7/Dctd/Hacd1/Mthfd1/Psph/Apoa1/Ak1/Pcx/Lss/Hif1a/Aldh1a3/Ada/Snai1/Plod3/Mtap/Pmvk/Mdh2/Psat1/Nnmt…
GO:1903131	mononuclear cell differentiation	450	-0.524124	-1.69893	1.04457e-08	1.04457e-08	9.53289e-07	2643	tags=30%, list=15%, signal=26%	Mef2c/Mmp14/Mr1/Malt1/Mafb/Stat5b/Cdk6/Atf2/Ccr7/Pla2g2d/Rasgrp1/Slc46a2/Dock11/Mertk/Zmiz1/Hdac7/Sh3rf1/Lipa/Cracr2a/Prex1/Cr2/Vnn1/Fbxo7/Gli3/Zc3h8/Axl/Sp3/Polm/Bcl3/B2m/Lag3/Stat4/Zfp608/Zeb1/Lyn/Il7r/Ifi204/Smarca2/Bmp4/Psap/Itpkb/Dock10/Patz1/Hs1bp3/Atp11c/Plcg2/Zfp36l1/Stat5a/Vsir/Il34/Itm2a/Nfam1/Irf1/Tpd52/Sh2b3/Dll1/Igtp/Notch2/Clec4d/Slamf9/Satb1/H2-DMa/Hlx/Traf3ip2/Lyl1/Mndal/Nlrp3/Flt…
GO:0042274	ribosomal small subunit biogenesis	100	0.612421	2.19559	1.12478e-08	1.12478e-08	1.00748e-06	4565	tags=63%, list=26%, signal=47%	Utp18/Nop56/Bysl/Wdr75/Nat10/Fbl/Rrp9/Mphosph10/Wdr46/Rrp7a/Mrps7/Pno1/Dimt1/Nol6/Imp4/Rcl1/Lsm6/Tsr1/Rrs1/Rps19bp1/Rpsa/Tbl3/Utp20/2810004N23Rik/Heatr1/Npm1/Nop14/Tsr3/Aatf/Wdr43/Nom1/Utp3/Rps5/Riok3/Wdr36/Nol10/Rps7/Rps9/Xrcc5/Nop58/Rps27l/Rpp40/Gtf2h5/Dcaf13/Dhx37/Utp11/Rps13/Fcf1/Rps19/Abt1/Rps6/Rps3a1/Rps11/Utp6/Tsr2/Rps24/Rps16/Ltv1/Ngdn/Nol11/Pwp2/Emg1/Ercc2
GO:0032944	regulation of mononuclear cell proliferation	233	-0.59685	-1.8786	1.16472e-08	1.16472e-08	1.02428e-06	2691	tags=36%, list=15%, signal=31%	Bcl2l1/Pde5a/Vav3/Mef2c/Stat5b/Prkcq/Ccr7/Pla2g2d/Aif1/H2-Q7/Rasal3/Sh3rf1/H2-D1/Tyk2/Prlr/Lyn/Cd86/Twsg1/Lst1/Bmp4/Sox11/Xcl1/Pkn1/Stat5a/Mzb1/Lmo1/Vsir/H2-DMb1/Irf1/Gpnmb/Tlr4/Cd55/Flt3l/Ptpn6/Icosl/Syk/St6gal1/Csf1r/Lrrc32/Cd37/Irgm1/Gpr183/Tnfsf9/Cd46/Tyrobp/H2-Q6/Tnfrsf21/H2-T23/Cd38/Tnfrsf13b/Laptm5/Il10/Il23a/Il15/Cd274/Ahr/Coro1a/Il1b/Nckap1l/Cd24a/H2-Q4/Fgf10/Card11/Inpp5d/Cd74/Lilrb4a/R…
GO:0050866	negative regulation of cell activation	195	-0.618611	-1.91825	1.80339e-08	1.80339e-08	1.55763e-06	2396	tags=35%, list=13%, signal=31%	H2-Q7/Nr1h3/Mertk/Fgr/H2-D1/C1qtnf1/Fbxo7/Gli3/Zc3h8/Hfe/Axl/Cygb/Lag3/Zfp608/Lyn/Cd86/Ubash3b/Twsg1/Lst1/Rian/Bmp4/Sox11/Grn/Pkn1/Vsir/Irf1/Gpnmb/Cd200/Alox12/Sh2b3/Hlx/Ptpn6/Trem2/Socs1/Lrrc32/Cd37/Zbtb46/Enpp3/Tyrobp/Cd9/H2-Q6/Tnfrsf21/H2-T23/Samsn1/Tnfrsf13b/Laptm5/Il10/Pdgfra/Cd274/Fgl2/Cd24a/H2-Q4/Nfkbid/Dtx1/Inpp5d/Cd74/Lilrb4a/Tnfaip8l2/Pglyrp1/Fcgr2b/H2-Aa/Cd84/Cd300a/Ripor2/Nrarp/Adgrf5…
GO:0007159	leukocyte cell-cell adhesion	366	-0.539946	-1.7407	2.18981e-08	2.18981e-08	1.85821e-06	2574	tags=29%, list=14%, signal=25%	Malt1/Stat5b/Prkcq/Ccr7/Pla2g2d/Aif1/Stk10/H2-Q7/Rasgrp1/Zmiz1/Rasal3/H2-D1/Vnn1/Gli3/Tyk2/Zc3h8/Hfe/Ephb4/B2m/Lag3/Zfp608/Il7r/Cd86/Twsg1/Smarca2/Cxcl12/Bmp4/Itpkb/Xcl1/Stat5a/Vsir/H2-DMb1/Irf1/Gpnmb/H2-DMa/Cd55/Hlx/Cav1/Nlrp3/Ptpn6/Sox13/Icosl/Socs1/Fermt3/Syk/Lrrc32/Cd37/Irgm1/Selplg/Efnb3/Tnfsf9/Cd46/Itgb7/H2-Ab1/H2-Q6/Tnfrsf21/H2-T23/Pik3r6/Sema4d/Sele/Laptm5/Itgb2/Il23a/Il15/Dock8/Cx3cr1/Cd…
GO:0009615	response to virus	309	-0.562368	-1.79287	2.30715e-08	2.30715e-08	1.92402e-06	1993	tags=29%, list=11%, signal=27%	Ticam2/Trim5/Bcl3/Oasl1/Parp9/Ikbke/Ifi204/Ifitm6/Cd86/Smad3/Slfn8/Mov10/Usp27x/Nmi/Unc93b1/Trim6/Il33/Aim2/Dhx58/Apobec3/Pmaip1/Trim25/Zc3hav1/Znfx1/Pml/Trim12c/Gli2/Irf1/Trim30d/Serinc3/Igtp/Ifi27l2a/Il10rb/Trim12a/Trim21/Irf5/Traf3ip2/Ifih1/Tlr3/Mndal/Nlrp3/Pde12/Dtx3l/Irf7/Cxcl9/Oas1a/Cd37/Apobec1/Irgm2/Stat2/Ifit2/Cxcl10/Irgm1/Oas1g/Tagap/Trim30a/Oas1c/Rnasel/Oasl2/Il23a/Il15/Gbp7/Trim34a/Il…
GO:0006954	inflammatory response	674	-0.481443	-1.56458	2.53869e-08	2.53869e-08	2.08122e-06	1947	tags=23%, list=11%, signal=21%	Tlr2/Adora2b/Lyn/Ptn/Abcd2/Gja1/Ifi204/Acp5/Notch1/Ggt5/Xcl1/Grn/Smad3/Trim14/Agtr1a/Sbno2/Nmi/Plcg2/Il33/Aim2/Stat5a/Dagla/Cysltr1/Mgll/Wnk4/Il34/Gprc5b/Fcgr3/Dmd/Zfp36/Epha2/Cd200/Adamts12/Tlr4/Igtp/Chst1/Ncf1/Notch2/C3ar1/Wnt5a/Casp4/Ccrl2/Ccl4/Irf5/Traf3ip2/Fbxl2/Tlr3/Tspan2/Mndal/P2rx7/Nlrp3/Tril/Ccl3/Ptpn6/Trem2/Cxcl9/Stab1/C1qa/Syk/Csf1r/Ctss/Ly96/Irgm2/Appl2/Cxcl10/Camk1d/Irgm1/Cd68/Tslp/…
GO:0070664	negative regulation of leukocyte proliferation	95	-0.708115	-2.03759	2.86773e-08	2.86773e-08	2.31179e-06	1904	tags=34%, list=11%, signal=30%	Lyn/Cd86/Twsg1/Lst1/Bmp4/Sox11/Pkn1/Il33/Vsir/Gpnmb/Ptpn6/Lrrc32/Cd37/Enpp3/Tyrobp/H2-Q6/Tnfrsf21/H2-T23/Tnfrsf13b/Laptm5/Il10/Cd274/Cd24a/H2-Q4/Inpp5d/Lilrb4a/Fcgr2b/H2-Aa/Ccl12/Cd300a/Ripor2/Ceacam1
GO:0016064	immunoglobulin mediated immune response	129	-0.651206	-1.94765	3.45984e-08	3.45984e-08	2.74339e-06	1155	tags=35%, list=6%, signal=33%	H2-Q7/Shld1/H2-D1/Cr2/Bcl3/Serping1/Il21r/Xcl1/Tnfsf13/Fcgr3/H2-DMa/Cd55/Traf3ip2/Ptpn6/Trem2/Irf7/C2/Icosl/C1qa/C1qc/Csf2rb2/C1qb/C1ra/Cd46/H2-Ab1/H2-Q6/Fcer1g/C1s1/H2-T23/Batf/Fgl2/H2-Q4/Cfh/Inpp5d/Il2rb/Cd74/Csf2rb/Ptprc/Fcgr2b/Nod2/Fcgr1/Cd28/Ighm/Fcgr4/Gimap5
GO:0030098	lymphocyte differentiation	401	-0.530493	-1.71156	3.97447e-08	3.97447e-08	3.10063e-06	2629	tags=32%, list=15%, signal=28%	Pbx1/Ctsl/Slamf8/Vav1/Rara/H2-Oa/Zc3h12a/Txk/Smarcd2/Mmp14/Mr1/Malt1/Mafb/Stat5b/Cdk6/Atf2/Ccr7/Pla2g2d/Rasgrp1/Slc46a2/Dock11/Mertk/Zmiz1/Hdac7/Sh3rf1/Lipa/Cracr2a/Prex1/Cr2/Vnn1/Fbxo7/Gli3/Zc3h8/Axl/Sp3/Polm/Bcl3/B2m/Lag3/Stat4/Zfp608/Zeb1/Il7r/Smarca2/Bmp4/Psap/Itpkb/Dock10/Patz1/Hs1bp3/Atp11c/Plcg2/Zfp36l1/Stat5a/Vsir/Itm2a/Nfam1/Irf1/Tpd52/Sh2b3/Dll1/Igtp/Notch2/Clec4d/Satb1/H2-DMa/Hlx/Traf3…
GO:0002758	innate immune response-activating signaling pathway	242	-0.580709	-1.82909	6.716e-08	6.716e-08	5.15623e-06	2122	tags=29%, list=12%, signal=26%	Colec12/Rab11fip2/Ticam2/Arrb2/Oasl1/Tlr2/Lyn/Ifi204/Slc15a2/Rnf125/Cd86/Klrk1/Lgr4/Nmi/Unc93b1/Plcg2/Aim2/Dhx58/Trim25/Zc3hav1/Irf1/Slc15a3/Tlr4/Igtp/Casp4/Cav1/Fbxl2/Ifih1/Tlr3/Mndal/Nlrp3/Tril/Trem2/Irf7/Syk/Oas1a/Ly96/Irgm2/Appl2/Irgm1/Oas1g/Tyrobp/Trim30a/Tifa/Oas1c/Clec4n/Clec4e/Pik3ap1/Cd274/Ifi203/Esr1/Gbp2/Tlr1/Cd14/Ddx60/Tifab/Nod2/Ifi207/Rsad2/Tlr7/Tnip3/Ifi208/Cd300a/Ifi206/Oas3/Gbp5/…
GO:0002218	activation of innate immune response	264	-0.57593	-1.82249	7.88972e-08	7.88972e-08	5.87944e-06	2122	tags=30%, list=12%, signal=26%	Colec12/Rab11fip2/Ticam2/Trim5/Arrb2/Oasl1/Tlr2/Lyn/Ifi204/Slc15a2/Rnf125/Cd86/Klrk1/Lgr4/Nmi/Unc93b1/Plcg2/Aim2/Dhx58/Trim25/Zc3hav1/Znfx1/Trim12c/Irf1/Trim30d/Slc15a3/Tlr4/Igtp/Trim12a/Casp4/Cav1/Fbxl2/Ifih1/Tlr3/Mndal/Nlrp3/Tril/Trem2/Irf7/Syk/Oas1a/Ly96/Irgm2/Appl2/Irgm1/Oas1g/Tyrobp/Trim30a/Tifa/Oas1c/Clec4n/Gbp7/Clec4e/Pik3ap1/Cd274/Ifi203/Esr1/Gbp2/Tlr1/Cd14/Ddx60/Tifab/Gbp3/Nod2/Ifi207/Rs…
GO:0006457	protein folding	153	0.527641	2.01399	7.9011e-08	7.9011e-08	5.87944e-06	2866	tags=52%, list=16%, signal=44%	Cryab/Sdf2l1/Hspa5/Hspb1/Fkbp11/Hsp90b1/Hspd1/Dnajc25/Hsp90aa1/Pdia5/Cct3/Hspa9/Pdia4/Grpel1/Ppil1/Pdia3/Bag1/Tbcb/Dnajb11/Calr/Cct7/Dnajc3/Nudcd2/P3h1/P4hb/Hspa4/Pdrg1/Fkbp10/Fkbp4/Ppia/Ppib/Prdx4/Fkbp2/Cct6a/Tcp1/Pfdn6/Dnlz/Ahsa2/Dnajc2/Sh3glb1/Cct2/Dnajb2/Mesd/Arl2/Unc45a/Dnajb1/Hsp90ab1/Hsph1/Ptges3l/Hspa2/Stub1/Pdcd5/Cct8/Txndc5/Cct5/Dnajc1/Pfdn2/Hspa4l/Fkbp9/Ppih/Tbcc/Cdc37/Nudc/Hspa13/Hspa…
GO:0001568	blood vessel development	693	-0.476785	-1.5498	8.37041e-08	8.37041e-08	6.13429e-06	2117	tags=24%, list=12%, signal=22%	Mrtfb/Bcas3/Sgpl1/Pnpla6/Foxj2/Ephb4/Reck/Shc1/Aldh1a2/Zbtb14/Pxn/Itga2b/Egf/Meis1/Gaa/Npr2/Efna1/Ptn/Gja1/Rin2/Vegfc/Notch1/Nr2f2/Amot/Cxcl12/Ago1/Bmp4/Amotl1/Grn/Foxc1/Mmp2/Agtr1a/Atp2b4/Sash1/Pik3r2/Zfp36l1/Emilin2/Cysltr1/Tgfbr3/Pml/Col4a1/Smoc2/Epha2/Col4a2/Sh2b3/Jup/Dll1/Fap/Flcn/Tmem100/Notch2/Vstm4/Gpc3/C3ar1/Wnt5a/Tek/Sema6a/Tspan12/Cav1/Lyl1/Tlr3/Sema5a/Tcf7l2/Robo2/Plxnd1/Cd34/Tcf4/Gad…
GO:0002706	regulation of lymphocyte mediated immunity	162	-0.627718	-1.92397	9.50582e-08	9.50582e-08	6.86241e-06	2692	tags=35%, list=15%, signal=30%	Tap2/Mr1/Malt1/Stat5b/H2-Q7/Rasgrp1/Shld1/H2-D1/Clec2d/Cr2/Hfe/Arrb2/B2m/Lag3/Il7r/Klrk1/Xcl1/Tap1/Tnfsf13/Dennd1b/Stat5a/Vsir/Klrb1a/Fcgr3/Cd55/P2rx7/Nlrp3/Ptpn6/Trem2/Cd46/H2-Q6/Fcer1g/H2-T23/Pik3r6/Il23a/Ahr/H2-T24/Il1b/Nckap1l/Cd24a/H2-Q4/Mill2/Lilrb4a/Ptprc/Fcgr2b/Nod2/Rsad2/Ccr2/Sash3/Cadm1/Fcgr1/Cd28/Klrd1/Igf2/Ceacam1/Gimap5
GO:0034097	response to cytokine	795	-0.468482	-1.52714	1.02348e-07	1.02348e-07	7.22329e-06	2041	tags=25%, list=11%, signal=23%	Rps6ka5/Axl/Aldh1a2/Synj1/Card14/Traf5/Eps8/Rab43/Prlr/Oasl1/Tlr2/Stat4/Parp9/Lyn/Gsn/Il7r/Ikbke/Ifi204/Ifitm6/Vegfc/Il21r/Acp5/Notch1/Rnf125/Ptp4a3/Cxcl12/Padi2/Xcl1/Adamts7/Irs1/Lrba/Foxc1/Cntfr/Gm4841/Myod1/Sbno2/Syngr1/Usp27x/Zfp36l1/Trim6/Il33/Pid1/Aim2/Rffl/Stat5a/Trim25/Slc27a1/Birc3/Ghr/Il34/Dapk1/Pml/Mme/Irf1/Plcb1/Lrch1/Zfp36/Ciita/Nsmaf/Adamts12/Slc22a5/Sh2b3/Tlr4/Rbm47/Igtp/Jarid2/Il1…
GO:0019724	B cell mediated immunity	131	-0.654375	-1.96143	1.03044e-07	1.03044e-07	7.22329e-06	1155	tags=35%, list=6%, signal=33%	H2-Q7/Shld1/H2-D1/Cr2/Bcl3/Serping1/Il21r/Xcl1/Tnfsf13/Fcgr3/H2-DMa/Cd55/Traf3ip2/Ptpn6/Trem2/Irf7/C2/Icosl/C1qa/C1qc/Csf2rb2/C1qb/C1ra/Cd46/H2-Ab1/H2-Q6/Fcer1g/C1s1/H2-T23/Pirb/Batf/Fgl2/H2-Q4/Cfh/Inpp5d/Il2rb/Cd74/Csf2rb/Ptprc/Fcgr2b/Nod2/Fcgr1/Cd28/Ighm/Fcgr4/Gimap5
GO:0002366	leukocyte activation involved in immune response	252	-0.576804	-1.82138	1.05084e-07	1.05084e-07	7.2611e-06	1722	tags=27%, list=10%, signal=25%	Bcl3/Stat4/Adora2b/Lyn/Grn/Dock10/Tnfsf13/Sbno2/Nmi/Plcg2/Il33/H2-DMb1/Cplx2/Itm2a/Irf1/Gab2/Tlr4/Dll1/Lat2/Notch2/Clec4d/Hlx/Nlrp3/Ptpn6/Slfn2/Trem2/Icosl/Syk/Gpr183/Stxbp2/Cd46/Enpp3/Tyrobp/Cd180/Lcp1/Fcer1g/Spi1/Itgb2/Il10/Il23a/Clec4e/Batf/Coro1a/Nckap1l/Fgl2/Nfkbid/Cd74/Lilrb4a/Rac2/Pglyrp1/Slc11a1/Dock2/Ptprc/Irf8/Nppc/Cd84/Itgal/Ly9/Ccr2/Ptafr/H2-DMb2/Cd300a/Cd28/Gata2/Lef1/Kit/Fcgr4/Mfng
GO:0000375	RNA splicing, via transesterification reactions	265	0.448674	1.83306	1.09795e-07	1.09795e-07	7.27482e-06	4585	tags=49%, list=26%, signal=37%	Nol3/Jmjd6/Snrpa1/Ppil1/Prdx6/Usp39/Prpf31/Snrpd1/Gemin5/Txnl4a/Sf3b5/Strap/C1qbp/Lsm4/Wdr77/Srsf3/Ncl/Cactin/Srsf2/Lsm6/Tssc4/Lsm3/Srsf7/U2af1/Ptbp1/Magoh/Eif4a3/Ncbp1/Phf5a/Srsf10/Eif1/Prmt5/Npm1/Lsm2/Gemin6/Rbm14/Snrpd3/Snrpb/Sde2/Sap18b/Rbm3/Magohb/Gemin7/Hnrnpu/Hnrnpul2/Srpk1/Zrsr2/Smn1/Rbm44/Sart3/Pcbp4/Sf3a1/Sfpq/Wdr83/Rbmx/Prmt7/Prpf19/Rbm17/Hspa8/Srsf9/Rnf113a2/Upf3a/Fra10ac1/Dazap1/Ppie…
GO:0000377	RNA splicing, via transesterification reactions with bulged adenosine as nucleophile	265	0.448674	1.83306	1.09795e-07	1.09795e-07	7.27482e-06	4585	tags=49%, list=26%, signal=37%	Nol3/Jmjd6/Snrpa1/Ppil1/Prdx6/Usp39/Prpf31/Snrpd1/Gemin5/Txnl4a/Sf3b5/Strap/C1qbp/Lsm4/Wdr77/Srsf3/Ncl/Cactin/Srsf2/Lsm6/Tssc4/Lsm3/Srsf7/U2af1/Ptbp1/Magoh/Eif4a3/Ncbp1/Phf5a/Srsf10/Eif1/Prmt5/Npm1/Lsm2/Gemin6/Rbm14/Snrpd3/Snrpb/Sde2/Sap18b/Rbm3/Magohb/Gemin7/Hnrnpu/Hnrnpul2/Srpk1/Zrsr2/Smn1/Rbm44/Sart3/Pcbp4/Sf3a1/Sfpq/Wdr83/Rbmx/Prmt7/Prpf19/Rbm17/Hspa8/Srsf9/Rnf113a2/Upf3a/Fra10ac1/Dazap1/Ppie…
GO:0000398	mRNA splicing, via spliceosome	265	0.448674	1.83306	1.09795e-07	1.09795e-07	7.27482e-06	4585	tags=49%, list=26%, signal=37%	Nol3/Jmjd6/Snrpa1/Ppil1/Prdx6/Usp39/Prpf31/Snrpd1/Gemin5/Txnl4a/Sf3b5/Strap/C1qbp/Lsm4/Wdr77/Srsf3/Ncl/Cactin/Srsf2/Lsm6/Tssc4/Lsm3/Srsf7/U2af1/Ptbp1/Magoh/Eif4a3/Ncbp1/Phf5a/Srsf10/Eif1/Prmt5/Npm1/Lsm2/Gemin6/Rbm14/Snrpd3/Snrpb/Sde2/Sap18b/Rbm3/Magohb/Gemin7/Hnrnpu/Hnrnpul2/Srpk1/Zrsr2/Smn1/Rbm44/Sart3/Pcbp4/Sf3a1/Sfpq/Wdr83/Rbmx/Prmt7/Prpf19/Rbm17/Hspa8/Srsf9/Rnf113a2/Upf3a/Fra10ac1/Dazap1/Ppie…
GO:0050830	defense response to Gram-positive bacterium	88	-0.70413	-2.0091	1.15118e-07	1.15118e-07	7.52444e-06	3545	tags=52%, list=20%, signal=42%	Adam17/Gsdmd/Tnf/Lbp/App/Rpl39/Lyz1/Tbk1/Il27ra/Tac1/Mr1/Myo1f/Chga/H2-Q7/Fgr/H2-D1/Scd1/B2m/Tlr2/Il7r/Acp5/Klrk1/Epha2/Pld1/Lyz2/Ncf1/Casp4/P2rx7/Nlrp3/H2-Q6/H2-T23/Gbp7/Mpeg1/Il1b/H2-Q4/Gbp2/C5ar1/Pglyrp1/Gbp3/Nod2/Hck/Gbp6/Gbp9/Cd36/Gbp8/Gbp4
GO:0048525	negative regulation of viral process	98	-0.685145	-1.98246	1.16991e-07	1.16991e-07	7.54488e-06	2371	tags=47%, list=13%, signal=41%	Inpp5k/Zfp809/Shfl/Isg15/Trim5/Oasl1/Fbln1/Gsn/Ifi204/Ifitm6/Trim14/Trim6/Apobec3/Trim25/Zc3hav1/Znfx1/Trim12c/Zfp36/Ciita/Ly6e/Trim30d/Trim12a/Trim21/Ifih1/Mndal/Oas1a/Oas1g/Sp100/Hmga2/Trim30a/Oas1c/Rnasel/Oasl2/Prox1/Ifi203/Cd74/Ifitm1/Ch25h/Ifi207/Oas2/Rsad2/Ifi208/Ifi206/Oas3/Ifi213/Ifi209
GO:0002263	cell activation involved in immune response	256	-0.572087	-1.8105	1.26949e-07	1.26949e-07	8.07938e-06	1722	tags=27%, list=10%, signal=24%	Bcl3/Stat4/Adora2b/Lyn/Grn/Dock10/Tnfsf13/Sbno2/Nmi/Plcg2/Il33/H2-DMb1/Cplx2/Itm2a/Irf1/Gab2/Tlr4/Dll1/Lat2/Notch2/Clec4d/Hlx/Nlrp3/Ptpn6/Slfn2/Trem2/Icosl/Syk/Gpr183/Stxbp2/Cd46/Enpp3/Tyrobp/Cd180/Lcp1/Fcer1g/Spi1/Itgb2/Il10/Il23a/Clec4e/Batf/Coro1a/Nckap1l/Fgl2/Nfkbid/Cd74/Lilrb4a/Rac2/Pglyrp1/Slc11a1/Dock2/Ptprc/Irf8/Nppc/Cd84/Itgal/Ly9/Ccr2/Ptafr/H2-DMb2/Cd300a/Cd28/Gata2/Lef1/Kit/Fcgr4/Mfng
GO:0050672	negative regulation of lymphocyte proliferation	88	-0.703534	-2.0074	1.29426e-07	1.29426e-07	8.13007e-06	1904	tags=33%, list=11%, signal=30%	Lyn/Cd86/Twsg1/Lst1/Bmp4/Sox11/Pkn1/Vsir/Gpnmb/Ptpn6/Lrrc32/Cd37/Tyrobp/H2-Q6/Tnfrsf21/H2-T23/Tnfrsf13b/Laptm5/Il10/Cd274/Cd24a/H2-Q4/Inpp5d/Lilrb4a/Fcgr2b/H2-Aa/Cd300a/Ripor2/Ceacam1
GO:0022618	protein-RNA complex assembly	167	0.514658	2.01176	1.42794e-07	1.42794e-07	8.85478e-06	3832	tags=46%, list=21%, signal=37%	Bop1/Mrto4/Eif6/Nol3/Hsp90aa1/Dhx29/Ruvbl2/Usp39/Rrp7a/Nufip1/Prpf31/Mrps7/Ppan/Mrpl20/Snrpd1/Gemin5/Nop2/Strap/Nle1/Lsm4/Wdr77/Mdn1/Znhit6/Brix1/Tssc4/Rrs1/Rpsa/Polr2d/Rpf2/Ncbp1/Srsf10/Prmt5/Lsm2/Rplp0/Eif3d/Gemin6/Snrpd3/Snrpb/Gemin7/Srpk1/Smn1/Eif5/Sart3/Sf3a1/Rps5/Rbmx/Rpl11/Prmt7/Pih1d2/Prpf19/Denr/Eif2s2/Tarbp2/Scaf11/Ruvbl1/Sf3a3/Puf60/Clns1a/Srsf1/Snrpd2/Xrcc5/Eif3a/Rps27l/Ddx46/Pih1d1/P…
GO:0048514	blood vessel morphogenesis	599	-0.484834	-1.57472	1.47517e-07	1.47517e-07	9.03188e-06	2117	tags=26%, list=12%, signal=23%	Mrtfb/Bcas3/Sgpl1/Pnpla6/Foxj2/Ephb4/Reck/Shc1/Pxn/Itga2b/Egf/Meis1/Npr2/Efna1/Ptn/Gja1/Rin2/Vegfc/Notch1/Nr2f2/Amot/Cxcl12/Ago1/Bmp4/Amotl1/Grn/Foxc1/Mmp2/Agtr1a/Atp2b4/Sash1/Pik3r2/Zfp36l1/Emilin2/Cysltr1/Tgfbr3/Pml/Col4a1/Smoc2/Epha2/Col4a2/Sh2b3/Jup/Dll1/Fap/Flcn/Tmem100/Notch2/Vstm4/C3ar1/Wnt5a/Tek/Sema6a/Tspan12/Cav1/Tlr3/Sema5a/Plxnd1/Cd34/Tcf4/Gadd45a/Ndnf/Stab1/Dcn/Syk/Rtl1/Spry2/Glul/Ra…
GO:0001944	vasculature development	726	-0.465972	-1.5155	2.31802e-07	2.31802e-07	1.40149e-05	2117	tags=24%, list=12%, signal=22%	Mrtfb/Bcas3/Sgpl1/Pnpla6/Foxj2/Ephb4/Reck/Shc1/Aldh1a2/Zbtb14/Pxn/Itga2b/Egf/Meis1/Gaa/Npr2/Efna1/Ptn/Gja1/Rin2/Vegfc/Notch1/Nr2f2/Amot/Smarca2/Cxcl12/Ago1/Bmp4/Amotl1/Grn/Foxc1/Mmp2/Agtr1a/Atp2b4/Sash1/Pik3r2/Zfp36l1/Emilin2/Cysltr1/Tgfbr3/Pml/Col4a1/Smoc2/Epha2/Col4a2/Sh2b3/Jup/Dll1/Fap/Flcn/Tmem100/Notch2/Vstm4/Gpc3/C3ar1/Wnt5a/Tek/Sema6a/Tmem204/Tspan12/Cav1/Lyl1/Tlr3/Sema5a/Tcf7l2/Robo2/Plxn…
GO:0002753	cytoplasmic pattern recognition receptor signaling pathway	155	-0.621376	-1.89593	2.50142e-07	2.50142e-07	1.4937e-05	1958	tags=30%, list=11%, signal=27%	Oasl1/Ifi204/Slc15a2/Rnf125/Cd86/Unc93b1/Plcg2/Dhx58/Trim25/Zc3hav1/Irf1/Slc15a3/Tlr4/Igtp/Casp4/Cav1/Fbxl2/Ifih1/Tlr3/Mndal/Nlrp3/Trem2/Irf7/Oas1a/Irgm2/Irgm1/Oas1g/Trim30a/Tifa/Oas1c/Pik3ap1/Ifi203/Gbp2/Ddx60/Nod2/Ifi207/Rsad2/Tlr7/Ifi208/Ifi206/Oas3/Gbp5/Cd36/Kcnj8/Ifi213/Ifi209
GO:0001525	angiogenesis	503	-0.494586	-1.60253	2.90591e-07	2.90591e-07	1.70283e-05	2074	tags=26%, list=12%, signal=24%	Pnpla6/Foxj2/Ephb4/Reck/Shc1/Pxn/Itga2b/Egf/Meis1/Npr2/Efna1/Ptn/Vegfc/Notch1/Amot/Cxcl12/Ago1/Bmp4/Amotl1/Grn/Foxc1/Mmp2/Agtr1a/Atp2b4/Sash1/Pik3r2/Emilin2/Cysltr1/Tgfbr3/Pml/Col4a1/Smoc2/Epha2/Col4a2/Sh2b3/Jup/Dll1/Fap/Flcn/Tmem100/Notch2/Vstm4/C3ar1/Wnt5a/Tek/Sema6a/Tspan12/Cav1/Tlr3/Sema5a/Plxnd1/Cd34/Tcf4/Gadd45a/Ndnf/Stab1/Dcn/Syk/Rtl1/Spry2/Glul/Ramp2/Cxcl10/Sp100/Ednra/Meox2/Cspg4/Clec14a…
GO:0042129	regulation of T cell proliferation	178	-0.603743	-1.85895	2.92205e-07	2.92205e-07	1.70283e-05	2542	tags=31%, list=14%, signal=27%	Stat5b/Prkcq/Ccr7/Pla2g2d/Aif1/H2-Q7/Rasal3/Sh3rf1/H2-D1/Tyk2/Cd86/Twsg1/Bmp4/Xcl1/Stat5a/Lmo1/Vsir/H2-DMb1/Irf1/Gpnmb/Cd55/Ptpn6/Icosl/Syk/Lrrc32/Cd37/Irgm1/Tnfsf9/Cd46/H2-Q6/Tnfrsf21/H2-T23/Laptm5/Il23a/Il15/Cd274/Coro1a/Il1b/Nckap1l/Cd24a/H2-Q4/Card11/Lilrb4a/Rac2/Ptprc/H2-Aa/Itgal/Ccr2/Kitl/Sash3/H2-DMb2/Cd28/Ripor2/Cd209a/Igf2/Ceacam1
GO:0002768	immune response-regulating cell surface receptor signaling pathway	249	-0.565294	-1.78524	2.9706e-07	2.9706e-07	1.71052e-05	2664	tags=31%, list=15%, signal=26%	Vav3/Mef2c/Rnf31/Malt1/Ccr7/Pde4b/Myo1g/H2-Q7/Nr1h3/Lipa/Cmklr1/H2-D1/Fyn/Stap1/Rab11fip2/Ticam2/Cd247/Tlr2/Lyn/Klrk1/Dennd1b/Nmi/Plcg2/Nfam1/Tlr4/Lat2/C3ar1/Clec4d/Tril/Ptpn6/Trem2/Ubash3a/Icosl/Syk/Oas1a/Ly96/Appl2/Oas1g/Blnk/Tyrobp/Prkch/H2-Q6/Oas1c/Fcer1g/Tnfrsf21/Gpld1/Cd38/Laptm5/Clec4n/Clec4e/Tec/Pik3ap1/Lpxn/Nckap1l/H2-Q4/Tlr1/Card11/Nfkbid/Cd14/Lilrb4a/C5ar1/Bcl2a1d/Cd22/Ptprc/Nod2/Themi…
GO:0071826	protein-RNA complex organization	177	0.501114	1.96814	3.26428e-07	3.26428e-07	1.85751e-05	4531	tags=52%, list=25%, signal=39%	Bop1/Mrto4/Eif6/Nol3/Hsp90aa1/Dhx29/Ruvbl2/Usp39/Rrp7a/Nufip1/Prpf31/Mrps7/Ppan/Mrpl20/Snrpd1/Gemin5/Nop2/Strap/Nle1/Lsm4/Wdr77/Mdn1/Znhit6/Brix1/Tssc4/Rrs1/Rpsa/Polr2d/Rpf2/Ncbp1/Srsf10/Prmt5/Lsm2/Rplp0/Eif3d/Vcp/Gemin6/Snrpd3/Snrpb/Gemin7/Srpk1/Smn1/Eif5/Sart3/Sf3a1/Rps5/Rbmx/Rpl11/Kif5b/Prmt7/Pih1d2/Prpf19/Denr/Eif2s2/Tarbp2/Scaf11/Ruvbl1/Sf3a3/Puf60/Clns1a/Srsf1/Tfip11/Snrpd2/Xrcc5/Eif3a/Rps2…
GO:0045071	negative regulation of viral genome replication	57	-0.745438	-2.02988	3.7626e-07	3.7626e-07	2.09478e-05	2371	tags=53%, list=13%, signal=46%	Inpp5k/Zfp809/Shfl/Isg15/Oasl1/Ifi204/Ifitm6/Trim6/Apobec3/Zc3hav1/Znfx1/Ifih1/Mndal/Oas1a/Oas1g/Hmga2/Oas1c/Rnasel/Oasl2/Prox1/Ifi203/Ifitm1/Ifi207/Oas2/Rsad2/Ifi208/Ifi206/Oas3/Ifi213/Ifi209
GO:0071345	cellular response to cytokine stimulus	710	-0.465422	-1.51351	3.76788e-07	3.76788e-07	2.09478e-05	1995	tags=25%, list=11%, signal=23%	Card14/Traf5/Eps8/Rab43/Prlr/Oasl1/Tlr2/Stat4/Parp9/Lyn/Gsn/Il7r/Ikbke/Ifi204/Ifitm6/Vegfc/Il21r/Notch1/Rnf125/Ptp4a3/Cxcl12/Padi2/Xcl1/Adamts7/Irs1/Lrba/Foxc1/Cntfr/Gm4841/Myod1/Sbno2/Syngr1/Usp27x/Zfp36l1/Trim6/Il33/Pid1/Aim2/Rffl/Stat5a/Trim25/Slc27a1/Birc3/Ghr/Il34/Dapk1/Pml/Mme/Irf1/Plcb1/Lrch1/Zfp36/Nsmaf/Adamts12/Sh2b3/Tlr4/Rbm47/Igtp/Jarid2/Il10rb/Rab20/Wnt5a/Casp4/Ccrl2/Ccl4/Irf5/Traf3ip…
GO:0006090	pyruvate metabolic process	121	0.560079	2.06283	4.17674e-07	4.17674e-07	2.29571e-05	766	tags=23%, list=4%, signal=22%	Slc16a3/Aldoc/Eno1/Pgk1/Eno1b/Pfkl/Slc2a6/Tpi1/Pgam1/Ldha/Pkm/Gapdh/Gale/Aldoa/Pdk1/Gck/Galk1/Htr2a/Ier3/Eif6/Gpi1/Adpgk/Pcx/Me1/Pdk3/Enpp1/Hif1a/Ddit4
GO:0002695	negative regulation of leukocyte activation	175	-0.605539	-1.86469	4.3151e-07	4.3151e-07	2.33545e-05	2396	tags=34%, list=13%, signal=29%	H2-Q7/Nr1h3/Mertk/Fgr/H2-D1/Fbxo7/Gli3/Zc3h8/Hfe/Axl/Lag3/Zfp608/Lyn/Cd86/Twsg1/Lst1/Bmp4/Sox11/Grn/Pkn1/Vsir/Irf1/Gpnmb/Cd200/Hlx/Ptpn6/Socs1/Lrrc32/Cd37/Zbtb46/Enpp3/Tyrobp/H2-Q6/Tnfrsf21/H2-T23/Samsn1/Tnfrsf13b/Laptm5/Il10/Cd274/Fgl2/Cd24a/H2-Q4/Nfkbid/Dtx1/Inpp5d/Cd74/Lilrb4a/Tnfaip8l2/Pglyrp1/Fcgr2b/H2-Aa/Cd84/Cd300a/Ripor2/Nrarp/Adgrf5/Ceacam1/Gimap5
GO:0006397	mRNA processing	451	0.367415	1.54492	4.34562e-07	4.34562e-07	2.33545e-05	4531	tags=42%, list=25%, signal=32%	Rrp1b/Zpr1/Nol3/Jmjd6/Snrpa1/Ybx1/Ppil1/Prdx6/Usp39/Prpf31/Snrpd1/Gemin5/Pus7/Txnl4a/Sf3b5/Strap/Thoc6/C1qbp/Lsm4/Wdr77/Srsf3/Alyref/Ncl/Cactin/Srsf2/Tbrg4/Lsm6/Tssc4/Lsm3/Srsf7/Pabpn1/Cdk12/Polr2d/U2af1/Lsm11/Ptbp1/Magoh/Eif4a3/Ncbp1/Phf5a/Srsf10/Aff2/Eif1/Prmt5/Npm1/Lsm2/Gemin6/Rbm14/Snrpd3/Rbm28/Snrpb/Sde2/Sap18b/Rbm3/Magohb/Zfp326/Ddx1/Gemin7/Hnrnpu/Ssu72/Hnrnpul2/Srpk1/Zrsr2/Smn1/Rbm44/Sart3…
GO:0141084	inflammasome-mediated signaling pathway	50	-0.774884	-2.07736	4.44476e-07	4.44476e-07	2.36248e-05	1289	tags=42%, list=7%, signal=39%	Plcg2/Tlr4/Igtp/Casp4/Fbxl2/Mndal/Nlrp3/Trem2/Irgm2/Irgm1/Trim30a/Ifi203/Gbp2/Ifi207/Ifi208/Ifi206/Gbp5/Cd36/Kcnj8/Ifi213/Ifi209
GO:0030217	T cell differentiation	301	-0.537017	-1.70924	4.85875e-07	4.85875e-07	2.52289e-05	2574	tags=32%, list=14%, signal=28%	Ctsl/Vav1/Rara/H2-Oa/Zc3h12a/Txk/Smarcd2/Mr1/Malt1/Mafb/Stat5b/Cdk6/Atf2/Ccr7/Pla2g2d/Rasgrp1/Slc46a2/Zmiz1/Sh3rf1/Lipa/Cracr2a/Prex1/Vnn1/Gli3/Zc3h8/Sp3/Bcl3/B2m/Lag3/Stat4/Zfp608/Zeb1/Il7r/Smarca2/Bmp4/Psap/Itpkb/Patz1/Hs1bp3/Zfp36l1/Stat5a/Vsir/Irf1/Sh2b3/Igtp/Clec4d/Satb1/H2-DMa/Hlx/Traf3ip2/Nlrp3/Sox13/Socs1/Syk/Gpr183/Tnfsf9/Cd46/Fcer1g/Pik3r6/Spi1/Il23a/Il15/Clec4e/Batf/Ikzf1/Il1b/Nckap1l/…
GO:0002221	pattern recognition receptor signaling pathway	236	-0.563151	-1.76947	4.89768e-07	4.89768e-07	2.52289e-05	2122	tags=28%, list=12%, signal=25%	Colec12/Rab11fip2/Ticam2/Arrb2/Oasl1/Tlr2/Lyn/Ifi204/Slc15a2/Rnf125/Cd86/Lgr4/Nmi/Unc93b1/Plcg2/Aim2/Dhx58/Trim25/Zc3hav1/Irf1/Slc15a3/Tlr4/Igtp/Casp4/Cav1/Fbxl2/Ifih1/Tlr3/Mndal/Nlrp3/Tril/Trem2/Irf7/Oas1a/Ly96/Irgm2/Appl2/Irgm1/Oas1g/Trim30a/Tifa/Oas1c/Clec4e/Pik3ap1/Cd274/Ifi203/Esr1/Gbp2/Tlr1/Cd14/Ddx60/Tifab/Nod2/Ifi207/Rsad2/Tlr7/Tnip3/Ifi208/Cd300a/Ifi206/Oas3/Gbp5/Cd36/Kcnj8/Ifi213/Ifi209
GO:0032945	negative regulation of mononuclear cell proliferation	89	-0.69953	-1.99299	4.90303e-07	4.90303e-07	2.52289e-05	1904	tags=33%, list=11%, signal=29%	Lyn/Cd86/Twsg1/Lst1/Bmp4/Sox11/Pkn1/Vsir/Gpnmb/Ptpn6/Lrrc32/Cd37/Tyrobp/H2-Q6/Tnfrsf21/H2-T23/Tnfrsf13b/Laptm5/Il10/Cd274/Cd24a/H2-Q4/Inpp5d/Lilrb4a/Fcgr2b/H2-Aa/Cd300a/Ripor2/Ceacam1
GO:0002181	cytoplasmic translation	142	0.520767	1.94901	5.16043e-07	5.16043e-07	2.62739e-05	4269	tags=48%, list=24%, signal=37%	Pkm/Eif4ebp1/Dhx29/Ybx1/Etf1/Rps2/Eif4a1/Eif2b3/Cpeb2/Eif2b1/Rpl3/Rpsa/Drg2/Eif2b5/Ncbp1/Zc3h15/Rwdd1/Eif3i/Rplp0/Eif3d/Rpl36al/Rpl8/Eif2b2/Hnrnpu/Rps3/Rpl10a/Rpl22l1/Eif5/Rpl18/Rpl13/Rps5/Cnbp/Rpl19/Rpl11/Denr/Syncrip/Rpl14/Eif2s2/Hnrnpd/Rps7/Rps9/Ncbp2/Eif3a/Rpl15/Rps13/Rpl18a/Rpl12/Rps19/Rps10/Mcts2/Rps4x/Rps6/Rps3a1/Rpl27/Rpl29/Rps11/Rpl31/Ythdf2/Mif4gd/Rpl4/Rps24/Rpl41/Rpl7/Rps16/Rpl9/Eif2ak…
GO:0033108	mitochondrial respiratory chain complex assembly	86	0.606569	2.10391	5.49722e-07	5.49722e-07	2.76971e-05	4894	tags=69%, list=27%, signal=50%	Cox18/Chchd7/Ndufab1/Cox19/Ndufaf5/Sdhaf1/Coa3/Uqcc2/Sco2/Samm50/Ndufb8/Ndufa8/Ndufb10/Aifm1/Ndufb6/Ndufs7/Ndufaf4/Ndufs3/Slc25a33/Ndufs8/Ndufa11/Ndufs5/Ndufs4/Lyrm7/Ndufb9/Ndufb7/Uqcc1/Tmem126a/Ndufaf2/Ndufb11/Cox14/Ndufs6/Ndufb2/Foxred1/Taco1/Ndufa13/Ndufaf6/Ndufa9/Dmac1/Ttc19/Ndufs2/Ndufa12/Lyrm2/Immp2l/Ndufaf7/Ndufa5/Ndufa10/Ndufb4/Smim20/Ndufc2/Ndufc1/Tmem223/Ndufaf8/Sdhaf2/Ndufb5/Ndufs1/Nub…
GO:0030155	regulation of cell adhesion	729	-0.464412	-1.51055	6.02667e-07	6.02667e-07	3.00516e-05	2575	tags=27%, list=14%, signal=24%	Lamb1/Malt1/Myo1f/Stat5b/Cdk6/Camsap3/Clasp2/Prkcq/Nrp1/Spint2/Ccr7/Pla2g2d/Aif1/Rap1gap/H2-Q7/Rasgrp1/Lamc1/Zmiz1/Rasal3/Ecm2/H2-D1/Lama3/Prex1/C1qtnf1/Zdhhc2/Vnn1/Rreb1/Gli3/Plxnb1/Tyk2/Zc3h8/Hfe/Ephb4/B2m/Prlr/Lag3/Zfp608/Tgm2/Fbln1/Lyn/Efna1/Il7r/Ptn/Rin2/Acp5/Notch1/Dab2/Cd86/Ubash3b/Twsg1/Col26a1/Taok2/Smarca2/Cxcl12/Bmp4/Cyth3/Itpkb/Itga3/Xcl1/Smad3/Mmp2/P2ry12/Triobp/Pik3r2/Limch1/Myoc/St…
GO:0050863	regulation of T cell activation	341	-0.526802	-1.68496	6.15095e-07	6.15095e-07	3.03583e-05	2574	tags=28%, list=14%, signal=25%	Malt1/Stat5b/Prkcq/Ccr7/Pla2g2d/Aif1/H2-Q7/Rasgrp1/Slc46a2/Zmiz1/Rasal3/Sh3rf1/H2-D1/Vnn1/Gli3/Tyk2/Zc3h8/Hfe/Ephb4/B2m/Lag3/Zfp608/Zeb1/Il7r/Cd86/Twsg1/Smarca2/Bmp4/Itpkb/Xcl1/Stat5a/Lmo1/Vsir/H2-DMb1/Irf1/Gpnmb/Sh2b3/H2-DMa/Cd55/Hlx/Cav1/Nlrp3/Ptpn6/Sox13/Icosl/Socs1/Syk/Lrrc32/Cd37/Irgm1/Efnb3/Tnfsf9/Cd46/H2-Ab1/H2-Q6/Tnfrsf21/H2-T23/Pik3r6/Laptm5/Il23a/Il15/Dock8/Cd274/Coro1a/Il1b/Nckap1l/Fgl…
GO:0072655	establishment of protein localization to mitochondrion	93	0.58149	2.06761	6.52031e-07	6.52031e-07	3.18563e-05	3942	tags=55%, list=22%, signal=43%	Mgarp/Tomm40/Hspd1/Nol3/Hsp90aa1/Timm10/Timm8a1/Grpel1/Cox18/Timm17a/Hspa4/Timm13/Timm23/Dnajc15/Rala/Timm50/Timm9/Moap1/Dnlz/Tspo/Sh3glb1/Timm17b/Samm50/Timm22/Bax/Pdcd5/Parl/Tomm20/Tomm5/Tomm70a/Cdkn2a/Aifm1/Bag3/Hk1/Mtch1/Pmpcb/Mtch2/Fbxw7/Fis1/Bcap31/Tomm22/Ndufa13/Pam16/Timm29/Aip/Dnajc19/Mapt/Mfn2/Immp2l/Lrrk2/Maip1
GO:0002683	negative regulation of immune system process	465	-0.500969	-1.62043	7.25437e-07	7.25437e-07	3.50883e-05	2270	tags=28%, list=13%, signal=25%	H2-D1/Clec2d/Lamp2/Cr2/Fbxo7/Trafd1/Gli3/Isg15/Stap1/Gpr137b/Zc3h8/Ticam2/Hfe/Axl/Arrb2/Serping1/Lag3/Zfp608/Lyn/Il7r/Ifi204/Acp5/Rnf125/Cd86/Ubash3b/Twsg1/Lst1/Cxcl12/Padi2/Bmp4/Sox11/Grn/Tap1/Pkn1/Lgr4/Nmi/Il33/Dhx58/Stat5a/Vsir/Masp1/Irf1/Plcb1/Lrch1/Gpnmb/Nbl1/Tsc22d3/Cd200/Ypel4/Snai2/Dll1/Igtp/Trim21/Cd55/Hlx/Fbxl2/Mndal/Ptpn6/Trem2/Ubash3a/Socs1/Oas1a/C1qc/Lrrc32/Cd37/Irgm2/Stat2/Irgm1/Oas…
GO:0042113	B cell activation	248	-0.56593	-1.78687	8.33158e-07	8.33158e-07	3.96674e-05	2010	tags=27%, list=11%, signal=24%	Sp3/Polm/Bcl3/Prlr/Lyn/Il7r/Cd86/Dock10/Pkn1/Tnfsf13/Atp11c/Plcg2/Zfp36l1/Stat5a/Mzb1/Itm2a/Nfam1/Tpd52/Tlr4/Dll1/Lat2/Notch2/Traf3ip2/Lyl1/Ptpn6/Dclre1c/Icosl/Syk/Gpr183/Blnk/Tyrobp/Cd180/H2-Ab1/Tnfrsf21/Cd38/Samsn1/Tnfrsf13b/Laptm5/Spi1/Il10/Batf/Ahr/Ikzf1/Nckap1l/Cd24a/Il2rg/Card11/Inpp5d/Cd74/Lilrb4a/Cd22/Hmga1/Ptprc/Irf8/Fcgr2b/Nod2/Themis2/Prkcb/Sash3/Cd300a/Cd28/Ighm/Lef1/Kit/Hhex/Mfng/Gim…
GO:0050678	regulation of epithelial cell proliferation	357	-0.51466	-1.65534	8.36512e-07	8.36512e-07	3.96674e-05	1978	tags=23%, list=11%, signal=21%	Egf/B2m/Adora2b/Osr2/Zeb1/Ptn/Gja1/Vegfc/Notch1/Dab2/Nr2f2/Rian/Cxcl12/Bmp4/Sox11/Grn/Smad3/Ptprk/Agtr1a/Ift80/Zfp36l1/Stat5a/Tgfbr3/Gli2/Zfp36/Zfas1/Snai2/Flcn/Bmp5/Notch2/Gpc3/Wnt5a/Tek/Nfib/Hlx/Cav1/Ptch1/Sema5a/Mtss1/Tcf7l2/Gas1/Glul/Ednra/Hmga2/Ccnd1/Il10/Prox1/Mmrn2/Esr1/Xdh/Fgf10/C5ar1/Cav2/Lims2/Wfdc1/Col18a1/Nod2/Fgf1/Cdkn1c/Itga4/Ccl11/Cldn1/Ednrb/Egfl7/Gata2/Flt1/Gli1/Flt4/Ngfr/Lama5/E…
GO:0050777	negative regulation of immune response	177	-0.593726	-1.83054	1.06356e-06	1.06356e-06	4.99444e-05	2270	tags=34%, list=13%, signal=30%	H2-D1/Clec2d/Cr2/Trafd1/Isg15/Hfe/Arrb2/Serping1/Il7r/Ifi204/Grn/Tap1/Nmi/Il33/Dhx58/Vsir/Masp1/Irf1/Trim21/Cd55/Hlx/Mndal/Ptpn6/Trem2/Oas1a/Stat2/Oas1g/Cd46/Enpp3/Parp14/H2-Q6/Oas1c/H2-T23/Samsn1/Spi1/Il10/Nlrc5/Dtx4/Ahr/Ifi203/Nckap1l/Fgl2/H2-Q4/Inpp5d/Lilrb4a/Pglyrp1/Ptprc/Fcgr2b/Nod2/Ifi207/Ccr2/Ifi208/Cd300a/Ifi206/Oas3/Ifi213/Klrd1/Igf2/Ifi209/Ceacam1
GO:0002429	immune response-activating cell surface receptor signaling pathway	242	-0.556878	-1.75403	1.07752e-06	1.07752e-06	5.01136e-05	2664	tags=30%, list=15%, signal=26%	Vav3/Mef2c/Rnf31/Malt1/Ccr7/Pde4b/Myo1g/H2-Q7/Nr1h3/Lipa/Cmklr1/H2-D1/Fyn/Stap1/Rab11fip2/Ticam2/Cd247/Tlr2/Lyn/Klrk1/Dennd1b/Nmi/Plcg2/Nfam1/Tlr4/Lat2/C3ar1/Tril/Ptpn6/Trem2/Ubash3a/Icosl/Syk/Oas1a/Ly96/Appl2/Oas1g/Blnk/Tyrobp/Prkch/H2-Q6/Oas1c/Fcer1g/Tnfrsf21/Gpld1/Cd38/Laptm5/Clec4n/Tec/Pik3ap1/Lpxn/Nckap1l/H2-Q4/Tlr1/Card11/Nfkbid/Cd14/Lilrb4a/C5ar1/Bcl2a1d/Cd22/Ptprc/Nod2/Themis2/Tnip3/Prkcb…
GO:0001763	morphogenesis of a branching structure	211	-0.573289	-1.79157	1.10187e-06	1.10187e-06	5.07577e-05	2009	tags=29%, list=11%, signal=26%	Pxn/Egf/Tmem67/Tgm2/Met/Notch1/Cxcl12/Bmp4/Ntn4/Lgr4/Agtr1a/Rere/Foxd1/Col13a1/Pml/Col4a1/Gli2/Epha2/Snai2/Gpc3/Wnt5a/Tek/Ptch1/Sema5a/Rdh10/Plxnd1/Spry2/Spry1/Tbx2/Hoxb7/Ednra/Etv5/Socs3/Hmga2/Il10/Pdgfra/Prox1/Ahr/Il1b/Esr1/Prdm1/Wnt6/Fgf10/Cxcr4/Fgf1/Ccl11/Cpe/Csmd1/Bmp7/Lef1/Flt1/Lama5/Hhex/Hhip/Eya1/Rasip1/Nrarp/Kdr/Pdgfb/Dll4/Agtr2/Tie1
GO:0051250	negative regulation of lymphocyte activation	156	-0.611511	-1.87008	1.13626e-06	1.13626e-06	5.18483e-05	2396	tags=34%, list=13%, signal=30%	Pla2g2d/H2-Q7/Mertk/Fgr/H2-D1/Fbxo7/Gli3/Zc3h8/Hfe/Axl/Lag3/Zfp608/Lyn/Cd86/Twsg1/Lst1/Bmp4/Sox11/Pkn1/Vsir/Irf1/Gpnmb/Hlx/Ptpn6/Socs1/Lrrc32/Cd37/Tyrobp/H2-Q6/Tnfrsf21/H2-T23/Samsn1/Tnfrsf13b/Laptm5/Il10/Cd274/Fgl2/Cd24a/H2-Q4/Nfkbid/Dtx1/Inpp5d/Cd74/Lilrb4a/Tnfaip8l2/Pglyrp1/Fcgr2b/H2-Aa/Cd300a/Ripor2/Nrarp/Ceacam1/Gimap5
GO:0046633	alpha-beta T cell proliferation	60	-0.733541	-2.00598	1.43677e-06	1.43677e-06	6.49479e-05	2506	tags=43%, list=14%, signal=37%	Prkcq/H2-Q7/Rasal3/Sh3rf1/H2-D1/Tyk2/Twsg1/Xcl1/Vsir/Irf1/Cd55/Syk/Irgm1/H2-Q6/H2-T23/Il23a/Il15/Cd274/Cd24a/H2-Q4/Card11/Lilrb4a/Dock2/Ptprc/Ccr2/Cd28
GO:0003158	endothelium development	131	-0.63447	-1.90176	1.46518e-06	1.46518e-06	6.56189e-05	1404	tags=30%, list=8%, signal=28%	Foxj2/Stc1/Zeb1/Met/Notch1/Nr2f2/Bmp4/Plcb1/Dmd/Adamts12/Alox12/Dll1/Tmem100/Cxcl10/Ednra/Pde2a/Prox1/Acvr2b/Il1b/Apold1/Rapgef3/Xdh/Itgax/Cxcr4/Col18a1/Fgf1/Cldn1/Ednrb/Pecam1/Ppp1r16b/F11r/Sox18/Kdr/Pdgfb/Ceacam1/Dll4/Cdh5/Cldn5/Tie1
GO:0001906	cell killing	169	-0.596014	-1.83142	1.56155e-06	1.56155e-06	6.92935e-05	2129	tags=37%, list=12%, signal=33%	Rab27a/H2-Q7/Rasgrp1/H2-D1/Clec2d/Stap1/Hfe/Arrb2/B2m/Lag3/Il7r/Cxcl14/Klrk1/Cxcl12/Tap1/Stat5a/Klrb1a/Fcgr3/Igtp/Lyz2/Ncf1/Cd55/P2rx7/Ptpn6/Cxcl9/Syk/Irgm2/Cxcl10/Stxbp2/Tyrobp/Ccl8/H2-Q6/H2-T23/Pik3r6/Spi1/Il23a/Gbp7/Cx3cr1/H2-T24/Coro1a/Nckap1l/Fgl2/H2-Q4/Mill2/Cfh/Gbp2/Nos2/Pglyrp1/Ptprc/Gbp3/Fcgr2b/Ccr5/Cd2/Ccl11/Cadm1/Fcgr1/Gbp5/Fcgr4/Klrd1/Igf2/Ceacam1/Gimap5/Gzma
GO:0061620	glycolytic process through glucose-6-phosphate	20	0.840624	2.23714	1.69724e-06	1.69724e-06	7.46298e-05	485	tags=55%, list=3%, signal=54%	Eno1/Pgk1/Eno1b/Pfkl/Tpi1/Pkm/Gapdh/Gale/Aldoa/Galk1/Gpi1
GO:0008593	regulation of Notch signaling pathway	80	-0.686183	-1.94223	1.75387e-06	1.75387e-06	7.6425e-05	1047	tags=28%, list=6%, signal=26%	Notch1/Rian/Gdpd5/Dll1/Robo2/Enho/Arrb1/Cd46/Fgf10/Dtx1/Nod2/Jag2/Egfl7/Gata2/Bmp7/Kit/Tspan15/Eya1/Nrarp/Dlk1/Dll4/Mfng
GO:0002274	myeloid leukocyte activation	213	-0.571559	-1.78623	1.77236e-06	1.77236e-06	7.65414e-05	1947	tags=31%, list=11%, signal=28%	Tlr2/Adora2b/Lyn/Klrk1/Grn/Sbno2/Nmi/Plcg2/Il33/Tmem229b/Wnk4/Fcgr3/Cplx2/Gab2/Cd200/Tlr4/Lat2/Notch2/Wnt5a/Clec4d/Traf3ip2/Tlr3/Flt3l/Ptpn6/Trem2/C1qa/Syk/Csf1r/Cd37/Irgm1/Stxbp2/Tslp/Tnfsf9/Enpp3/Clu/Tyrobp/Fcer1g/Pirb/Spi1/Itgb2/Il10/Il15/Cx3cr1/Batf/Batf3/Tlr1/Lilrb4a/C5ar1/Rac2/Il16/Slc11a1/Dock2/Cd48/Nppc/Cd84/Ccr2/Lcp2/Ptafr/Cd300lb/Cd300a/Gata2/Kit/Fcgr4/Kcnj8/Adgrf5/Gimap5
GO:1903037	regulation of leukocyte cell-cell adhesion	335	-0.524027	-1.67291	1.9207e-06	1.9207e-06	8.22135e-05	2574	tags=28%, list=14%, signal=24%	Malt1/Stat5b/Prkcq/Ccr7/Pla2g2d/Aif1/H2-Q7/Rasgrp1/Zmiz1/Rasal3/H2-D1/Vnn1/Gli3/Tyk2/Zc3h8/Hfe/Ephb4/B2m/Lag3/Zfp608/Il7r/Cd86/Twsg1/Smarca2/Cxcl12/Bmp4/Itpkb/Xcl1/Stat5a/Vsir/H2-DMb1/Irf1/Gpnmb/H2-DMa/Cd55/Hlx/Cav1/Nlrp3/Ptpn6/Sox13/Icosl/Socs1/Syk/Lrrc32/Cd37/Irgm1/Efnb3/Tnfsf9/Cd46/H2-Ab1/H2-Q6/Tnfrsf21/H2-T23/Pik3r6/Sele/Laptm5/Itgb2/Il23a/Il15/Dock8/Cd274/Coro1a/Il1b/Nckap1l/Fgl2/Selp/Cd24a/…
GO:0018126	protein hydroxylation	25	0.823263	2.31094	1.99044e-06	1.99044e-06	8.44512e-05	1271	tags=56%, list=7%, signal=52%	Egln3/P4ha2/Egln1/P4ha1/Plod2/Jmjd6/P3h4/Plod3/P3h1/P4hb/Fkbp10/P4ha3/Prdx4/P3h2
GO:0006094	gluconeogenesis	82	0.59517	2.04114	2.18546e-06	2.18546e-06	9.19195e-05	1628	tags=33%, list=9%, signal=30%	Adipoq/Aldoc/Eno1/Pgk1/Tpi1/Pgam1/Erfe/Rbp4/Gapdh/Gck/Dgat2/Pgp/C1qtnf3/Gpi1/G6pc3/Sesn2/Slc39a14/Pcx/Hif1a/Mdh2/Nnmt/Supt20/Got1/Ddb1/Serpina12/Atf4/Slc25a11
GO:0032613	interleukin-10 production	53	-0.744424	-2.00874	2.21928e-06	2.21928e-06	9.25373e-05	2166	tags=47%, list=12%, signal=42%	Isg15/Bcl3/Tlr2/Trib2/Plcg2/Vsir/Tlr4/Dll1/Rbm47/Trem2/Syk/Tslp/Cd46/Tyrobp/Fcer1g/Tnfrsf21/Il23a/Cd274/Lilrb4a/Fcgr2b/Nod2/Cd84/Sash3/Cd83/Cd28
GO:0070585	protein localization to mitochondrion	100	0.55746	1.99854	2.26561e-06	2.26561e-06	9.36617e-05	3942	tags=53%, list=22%, signal=42%	Mgarp/Tomm40/Hspd1/Nol3/Hsp90aa1/Timm10/Timm8a1/Grpel1/Cox18/Bag1/Timm17a/Hspa4/Timm13/Timm23/Dnajc15/Rala/Timm50/Timm9/Moap1/Dnlz/Tspo/Sh3glb1/Timm17b/Samm50/Timm22/Bax/Pdcd5/Parl/Tomm20/Tomm5/Tomm70a/Cdkn2a/Aifm1/Bag3/Hk1/Mtch1/Pmpcb/Mtch2/Fbxw7/Fis1/Bcap31/Tomm22/Ndufa13/Pam16/Timm29/Aip/Dnajc19/Mapt/Fkbp8/Mfn2/Immp2l/Lrrk2/Maip1
GO:0001570	vasculogenesis	84	-0.686944	-1.96278	2.30231e-06	2.30231e-06	9.4372e-05	2490	tags=36%, list=14%, signal=31%	Nrp1/Tead2/Zmiz1/Spred1/Hdac7/Sgpl1/Npr2/Rin2/Notch1/Amot/Zfp36l1/Tgfbr3/Epha2/Tmem100/Tek/Cav1/Cd34/Ramp2/Asb4/Ntrk2/Xdh/Fgf1/Egfl7/Hhex/Rasip1/Sox18/Kdr/Ceacam1/Aplnr/Tie1
GO:0030101	natural killer cell activation	84	-0.684853	-1.9568	2.42904e-06	2.42904e-06	9.873e-05	2542	tags=37%, list=14%, signal=32%	Stat5b/Rab27a/H2-Q7/Rasgrp1/Mertk/Fgr/H2-D1/Tyk2/Ticam2/Axl/Sp3/Klrk1/Stat5a/Irf1/Flt3l/Tyrobp/H2-Q6/H2-T23/Il23a/Il15/Ikzf1/Coro1a/Prdm1/H2-Q4/Lilrb4a/Pglyrp1/Ptprc/Cd2/Slamf7/Fcgr4/Klrd1
GO:0022409	positive regulation of cell-cell adhesion	289	-0.528224	-1.67658	2.74195e-06	2.74195e-06	0.000110399	1534	tags=22%, list=9%, signal=21%	Stat5a/Emilin2/Vsir/H2-DMb1/Irf1/Dennd6a/Wnt5a/H2-DMa/Cd55/Hlx/Cav1/Nlrp3/Sox13/Icosl/Socs1/Syk/Irgm1/Efnb3/Tnfsf9/Cd46/Gcnt2/H2-Ab1/H2-Q6/H2-T23/Pik3r6/Sele/Adam19/Itgb2/Il23a/Il15/Dock8/Cd274/Plpp3/Coro1a/Il1b/Nckap1l/Selp/Cd24a/H2-Q4/Il2rg/Card11/Nfkbid/Cd74/Lilrb4a/H2-Eb1/Ptprc/Ccr5/H2-Aa/Itga4/Itgal/Ccr2/Kitl/Sash3/Ptafr/H2-DMb2/Cd83/Cd28/Bmp7/Lef1/Itga6/Podxl/F11r/Igf2/Ceacam1/Gimap5
GO:0002444	myeloid leukocyte mediated immunity	102	-0.653473	-1.9029	2.76178e-06	2.76178e-06	0.000110399	2445	tags=38%, list=14%, signal=33%	Chga/H2-Q7/Rasgrp1/Fgr/H2-D1/Stap1/Ticam2/Adora2b/Lyn/Fcgr3/Cplx2/Gab2/Lat2/Ncf1/Traf3ip2/Syk/Stxbp2/Tyrobp/H2-Q6/Fcer1g/H2-T23/Spi1/Itgb2/Cx3cr1/H2-Q4/Rac2/Ace/Fcgr2b/Nppc/Cd84/Spon2/Ccr2/Ptafr/Cd300lb/Fcgr1/Cd300a/Gata2/Kit/Fcgr4
GO:0022407	regulation of cell-cell adhesion	440	-0.490375	-1.58835	2.84867e-06	2.84867e-06	0.000112939	2506	tags=27%, list=14%, signal=23%	Prkcq/Spint2/Ccr7/Pla2g2d/Aif1/Rap1gap/H2-Q7/Rasgrp1/Zmiz1/Rasal3/H2-D1/C1qtnf1/Zdhhc2/Vnn1/Gli3/Tyk2/Zc3h8/Hfe/Ephb4/B2m/Lag3/Zfp608/Lyn/Il7r/Notch1/Cd86/Ubash3b/Twsg1/Taok2/Smarca2/Cxcl12/Bmp4/Itpkb/Xcl1/Stat5a/Emilin2/Vsir/H2-DMb1/Irf1/Gpnmb/Dennd6a/Alox12/Sh2b3/Wnt5a/H2-DMa/Cd55/Hlx/Cav1/Nlrp3/Ptpn6/Sox13/Icosl/Socs1/Fermt3/Syk/Lrrc32/Cd37/Irgm1/Efnb3/Tnfsf9/Cd46/Gcnt2/H2-Ab1/Cd9/H2-Q6/Tnfrsf…
GO:0050673	epithelial cell proliferation	427	-0.497775	-1.60991	2.99456e-06	2.99456e-06	0.000117758	1978	tags=23%, list=11%, signal=21%	Egf/B2m/Adora2b/Osr2/Zeb1/Rps6ka1/Ptn/Gja1/Vegfc/Notch1/Dab2/Nr2f2/Rian/Cxcl12/Bmp4/Sox11/Grn/Smad3/Ptprk/Lgr4/Agtr1a/Ift80/Zfp36l1/Stat5a/Tgfbr3/Gli2/Zfp36/Epha2/Zfas1/Snai2/Fap/Flcn/Bmp5/Ncf1/Notch2/Vstm4/Gpc3/Wnt5a/Tek/Nfib/Hlx/Scarb1/Cav1/Ptch1/Sema5a/Mtss1/Tcf7l2/Cd34/Gas1/Glul/Tbx2/Ednra/Enpep/Hmga2/Serpinb1b/Klk8/Ccnd1/Igfbp5/Il10/Prox1/Mmrn2/Esr1/Xdh/Fgf10/C5ar1/Cav2/Lims2/Wfdc1/Col18a1/N…
GO:0032653	regulation of interleukin-10 production	50	-0.754449	-2.02258	3.0708e-06	3.0708e-06	0.000119776	2166	tags=50%, list=12%, signal=44%	Isg15/Bcl3/Tlr2/Trib2/Plcg2/Vsir/Tlr4/Dll1/Rbm47/Trem2/Syk/Tslp/Cd46/Tyrobp/Fcer1g/Tnfrsf21/Il23a/Cd274/Lilrb4a/Fcgr2b/Nod2/Cd84/Sash3/Cd83/Cd28
GO:0018208	peptidyl-proline modification	38	0.748989	2.3062	3.09541e-06	3.09541e-06	0.000119776	2615	tags=58%, list=15%, signal=50%	Egln3/P4ha2/Egln1/Fkbp11/P4ha1/Ntmt1/Ppil1/Pin1/P4hb/Fkbp10/Fkbp4/P4ha3/Ppia/Ppib/Prdx4/Fkbp2/P3h2/Fkbp1a/Ppih/Ppie/Ppid/Ppil3
GO:0055086	nucleobase-containing small molecule metabolic process	525	0.342817	1.46705	3.19396e-06	3.19396e-06	0.000121778	3546	tags=37%, list=20%, signal=31%	Aldoc/Cmah/Eno1/Pgk1/Eno1b/Pfkl/Slc2a6/Tpi1/Pgam1/Ldha/Pkm/Ak4/Gapdh/Gale/Hmgcs1/Mvd/Aldoa/Pdk1/Gck/Dgat2/Galk1/Nme1/Csgalnact1/Slc27a3/Htr2a/Gmppb/Cda/Uck2/Prdx5/Ier3/Gmds/Mvk/Guk1/Aldh1l2/Ran/Nme2/Eif6/Hmgcr/Nt5c/Gpi1/Entpd6/Uap1/Acot7/Dctd/Nudt19/Mthfd1/Pemt/Ampd1/Dctpp1/Adpgk/Ak1/Pcx/Me1/Guca1a/Pdk3/Enpp1/Hif1a/Ada/Ddit4/Mtap/Txnrd1/Pmvk/Mdh2/Ak2/Dut/Acot4/Slc25a25/Gnpnat1/Dera/Ndufab1/Park7/…
GO:0050792	regulation of viral process	157	-0.604492	-1.84967	3.19777e-06	3.19777e-06	0.000121778	2433	tags=36%, list=14%, signal=32%	Adarb1/Inpp5k/Zfp809/Shfl/Isg15/Trim5/Axl/Oasl1/Fbln1/Gsn/Ifi204/Ifitm6/Notch1/Trim14/Dynlt1a/Dynlt1b/Trim6/Apobec3/Trim25/Dynlt1c/Zc3hav1/Znfx1/Trim12c/Zfp36/Ciita/Ly6e/Trim30d/Map3k1/Trim12a/Trim21/Ifih1/Mndal/Pde12/Oas1a/Oas1g/Sp100/Hmga2/Trim30a/Oas1c/Rnasel/Oasl2/Prox1/Trim34a/Ifi203/Cd74/Ifitm1/Cxcr4/Ch25h/Ifi207/Oas2/Rsad2/Ifi208/Ifi206/Oas3/Ifi213/Nr5a2/Ifi209
GO:0002824	positive regulation of adaptive immune response based on somatic recombination of immune receptors built from immunoglobulin superfamily domains	121	-0.634466	-1.88604	3.22269e-06	3.22269e-06	0.000121778	2692	tags=34%, list=15%, signal=29%	Tap2/Mr1/Malt1/Prkcq/H2-Q7/Shld1/H2-D1/Tyk2/Hfe/B2m/Xcl1/Tnfsf13/Dennd1b/Fcgr3/H2-DMa/Cd55/P2rx7/Nlrp3/Trem2/H2-Ab1/H2-Q6/Fcer1g/H2-T23/Clec4n/Il23a/Cd274/H2-T24/Il1b/Cd24a/H2-Q4/Mill2/Nfkbid/Slc11a1/Ptprc/Nod2/Rsad2/Ccr2/Sash3/Fcgr1/Cd28/Gimap5
GO:0050864	regulation of B cell activation	129	-0.608237	-1.81913	3.90694e-06	3.90694e-06	0.00014649	1688	tags=29%, list=9%, signal=27%	Prlr/Lyn/Pkn1/Tnfsf13/Atp11c/Zfp36l1/Stat5a/Mzb1/Nfam1/Tlr4/Ptpn6/Syk/Gpr183/Tyrobp/Tnfrsf21/Cd38/Samsn1/Tnfrsf13b/Laptm5/Spi1/Il10/Ahr/Nckap1l/Cd24a/Il2rg/Card11/Inpp5d/Cd74/Lilrb4a/Cd22/Ptprc/Fcgr2b/Nod2/Themis2/Sash3/Cd300a/Cd28/Ighm
GO:0042832	defense response to protozoan	37	-0.789024	-2.00451	4.60496e-06	4.60496e-06	0.000171334	927	tags=46%, list=5%, signal=44%	Igtp/Cd37/Irgm2/Il10/Gbp7/Batf/Gbp2/Slc11a1/Irf8/Gbp3/Iigp1/Gbp6/Gbp9/Tgtp2/Gbp8/Tgtp1/Gbp4
GO:0019722	calcium-mediated signaling	179	-0.57802	-1.77961	4.83927e-06	4.83927e-06	0.000178678	1659	tags=25%, list=9%, signal=23%	P2ry12/Agtr1a/Atp2b4/Pdk2/Atp1b1/Plcg2/Ank2/Dmd/Lat2/Igtp/Tmem100/C3ar1/Dmpk/Ccrl2/Trem2/Syk/Irgm2/Irgm1/Car8/Rem1/Ackr4/Ntrk2/Pdgfra/Cx3cr1/Selp/Cd24a/Cd22/Cxcr4/Chp2/Ptprc/Ccr5/Ppp1r9a/Itgal/Ccr2/Erbb3/Tenm2/Ednrb/Casq2/Cdh13/Kcnj8/Ramp3/Nr5a2/Kdr/Pln
GO:0002704	negative regulation of leukocyte mediated immunity	70	-0.704111	-1.9717	5.04294e-06	5.04294e-06	0.000184787	2396	tags=40%, list=13%, signal=35%	H2-Q7/H2-D1/Clec2d/Cr2/Hfe/Arrb2/Il7r/Tap1/Vsir/Ptpn6/Cd46/H2-Q6/H2-T23/Spi1/Cx3cr1/Ahr/Nckap1l/H2-Q4/Lilrb4a/Ptprc/Fcgr2b/Nod2/Cd84/Ccr2/Cd300a/Klrd1/Igf2/Ceacam1
GO:0006888	endoplasmic reticulum to Golgi vesicle-mediated transport	116	0.514717	1.89769	5.28524e-06	5.28524e-06	0.000192209	3930	tags=52%, list=22%, signal=41%	Insig1/Hyou1/Yif1b/Trappc6a/Yif1a/Kdelr3/Cope/Erp29/P4hb/Tmed9/Copb2/Trappc5/Sar1a/Rangrf/Vapa/Golt1b/Lman1/Trappc4/Tmed2/Tex261/Tmed3/Sec13/Lmf1/Vcp/Tmed1/Copb1/Copg1/Trip11/Rint1/Preb/Uso1/Ier3ip1/Ykt6/Trappc3/Lman2/Yipf6/Sar1b/Sec23a/Tmed10/Stx18/Kdelr2/Tfg/Sec23b/Tmed5/Trappc6b/Trappc1/Bcap31/Arf1/Mia3/Sec22b/Mia2/Trappc13/Scfd1/Yipf5/Sec16a/Sec24d/Kdelr1/Ergic2/Lrrk2/Rab1a
GO:0002822	regulation of adaptive immune response based on somatic recombination of immune receptors built from immunoglobulin superfamily domains	181	-0.571333	-1.75866	5.45494e-06	5.45494e-06	0.000196901	2692	tags=31%, list=15%, signal=27%	Tap2/Mef2c/Mr1/Malt1/Prkcq/Ccr7/H2-Q7/Shld1/H2-D1/Cr2/Tyk2/Hfe/B2m/Il7r/Xcl1/Pkn1/Tnfsf13/Dennd1b/Il33/Vsir/Fcgr3/Irf1/H2-DMa/Cd55/Hlx/P2rx7/Nlrp3/Ptpn6/Trem2/Cd46/H2-Ab1/H2-Q6/Fcer1g/H2-T23/Clec4n/Il23a/Cd274/Ahr/H2-T24/Il1b/Nckap1l/Cd24a/H2-Q4/Mill2/Nfkbid/Lilrb4a/Slc11a1/Ptprc/Fcgr2b/Nod2/Rsad2/Ccr2/Sash3/Fcgr1/Cd28/Klrd1/Gimap5
GO:0141085	regulation of inflammasome-mediated signaling pathway	47	-0.758545	-2.01382	5.53766e-06	5.53766e-06	0.000198406	1580	tags=43%, list=9%, signal=39%	Ifi204/Plcg2/Tlr4/Igtp/Casp4/Fbxl2/Mndal/Trem2/Irgm2/Irgm1/Trim30a/Ifi203/Gbp2/Ifi207/Ifi208/Ifi206/Gbp5/Cd36/Ifi213/Ifi209
GO:0019319	hexose biosynthetic process	85	0.574676	1.9857	5.87699e-06	5.87699e-06	0.000209015	1628	tags=32%, list=9%, signal=29%	Adipoq/Aldoc/Eno1/Pgk1/Tpi1/Pgam1/Erfe/Rbp4/Gapdh/Gck/Dgat2/Pgp/C1qtnf3/Gpi1/G6pc3/Sesn2/Slc39a14/Pcx/Hif1a/Mdh2/Nnmt/Supt20/Got1/Ddb1/Serpina12/Atf4/Slc25a11
GO:0048002	antigen processing and presentation of peptide antigen	54	-0.728793	-1.97199	5.98394e-06	5.98394e-06	0.000209443	2888	tags=61%, list=16%, signal=51%	Ctsl/H2-Oa/Tap2/Mr1/Tapbpl/H2-Q7/H2-D1/Hfe/B2m/Mfsd6/Tap1/Unc93b1/H2-DMb1/Fcgr3/H2-DMa/Trem2/Ctss/H2-Ab1/H2-Q6/Fcer1g/H2-T23/Ifi30/Mpeg1/H2-T24/H2-Q4/Mill2/Cd74/Slc11a1/H2-Eb1/Fcgr2b/H2-Aa/H2-DMb2/Fcgr1
GO:0043410	positive regulation of MAPK cascade	440	-0.483874	-1.56729	6.00648e-06	6.00648e-06	0.000209443	2241	tags=26%, list=13%, signal=23%	Ccl9/Cracr2a/Vangl2/Gsdme/C1qtnf1/Ddr2/Insr/Trim5/Map2k6/Shc1/Arrb2/Egf/Tlr2/Efna1/Met/Gsn/Dixdc1/Notch1/Dab2/Itga1/Taok2/Cxcl12/Adra1a/Bmp4/Psap/Xcl1/Sash1/Plcg2/Map3k5/Myoc/Dok4/Il34/Trim12c/P2ry6/Plcb1/Gpnmb/Trim30d/Akap12/Tlr4/Map3k1/Mturn/Notch2/Wnt5a/Trim12a/Dok2/Tek/Ccl4/Tlr3/Map3k11/P2rx7/Igfbp6/Ccl3/Gadd45a/Trem2/Arrb1/Syk/Spry2/Csf1r/Gpr183/Ednra/Cspg4/Peli2/Gcnt2/Gdf15/Trim30a/Ntrk2/Cc…
GO:1903900	regulation of viral life cycle	128	-0.616117	-1.84294	6.01891e-06	6.01891e-06	0.000209443	2433	tags=38%, list=14%, signal=33%	Adarb1/Inpp5k/Zfp809/Shfl/Isg15/Trim5/Axl/Oasl1/Gsn/Ifi204/Ifitm6/Notch1/Trim6/Apobec3/Trim25/Zc3hav1/Znfx1/Trim12c/Ciita/Ly6e/Trim30d/Trim12a/Trim21/Ifih1/Mndal/Pde12/Oas1a/Oas1g/Hmga2/Trim30a/Oas1c/Rnasel/Oasl2/Prox1/Trim34a/Ifi203/Cd74/Ifitm1/Ch25h/Ifi207/Oas2/Rsad2/Ifi208/Ifi206/Oas3/Ifi213/Nr5a2/Ifi209
GO:0061615	glycolytic process through fructose-6-phosphate	25	0.809129	2.27127	6.31377e-06	6.31377e-06	0.000218134	485	tags=44%, list=3%, signal=43%	Eno1/Pgk1/Eno1b/Pfkl/Tpi1/Pkm/Gapdh/Gale/Aldoa/Galk1/Gpi1
GO:0009150	purine ribonucleotide metabolic process	347	0.372405	1.57823	7.17141e-06	7.17141e-06	0.000246007	3546	tags=37%, list=20%, signal=30%	Aldoc/Eno1/Pgk1/Eno1b/Pfkl/Slc2a6/Tpi1/Pgam1/Pkm/Ak4/Gapdh/Gale/Hmgcs1/Mvd/Aldoa/Pdk1/Gck/Dgat2/Galk1/Nme1/Slc27a3/Htr2a/Ier3/Mvk/Guk1/Ran/Nme2/Eif6/Hmgcr/Nt5c/Gpi1/Acot7/Nudt19/Mthfd1/Ampd1/Adpgk/Ak1/Pdk3/Enpp1/Hif1a/Ada/Ddit4/Pmvk/Ak2/Acot4/Slc25a25/Ndufab1/Acot1/Nudt18/Gart/Pfkp/Fasn/Gmpr2/Tspo/Atpsckmt/Mpc1/Arl2/Vdac1/Atic/Adcy2/Impdh1/Nudt11/Nudt2/Suclg1/Acsl4/Foxk2/Vcp/Ndufb8/Ndufa8/Ndufb10…
GO:0002821	positive regulation of adaptive immune response	129	-0.60168	-1.79952	7.45387e-06	7.45387e-06	0.000253896	2692	tags=33%, list=15%, signal=28%	Tap2/Mr1/Malt1/Prkcq/H2-Q7/Shld1/H2-D1/Tyk2/Hfe/B2m/Xcl1/Tnfsf13/Dennd1b/Fcgr3/H2-DMa/Cd55/P2rx7/Nlrp3/Trem2/H2-Ab1/H2-Q6/Fcer1g/H2-T23/Clec4n/Il23a/Cd274/H2-T24/Il1b/Cd24a/H2-Q4/Mill2/Nfkbid/Cd74/Slc11a1/Ptprc/Nod2/Rsad2/Ccr2/Sash3/Fcgr1/Cd28/Gimap5
GO:0006091	generation of precursor metabolites and energy	398	0.359335	1.56077	7.55312e-06	7.55312e-06	0.000255477	3531	tags=37%, list=20%, signal=30%	Aldoc/Eno1/Pgk1/Bnip3/Eno1b/Pfkl/Slc2a6/Tpi1/Pgam1/Ldha/Pkm/Ak4/Gapdh/Gale/Aldoa/Cox7a1/Gck/Galk1/Gys1/Htr2a/Slc1a3/Ier3/Pgm1/Stbd1/Aldh1l2/Eif6/Cox4i2/Cisd1/Prelid1/Gpi1/Shmt2/Cycs/Fdx2/Nr4a3/Adpgk/Mybbp1a/Enpp1/Hif1a/Gadd45gip1/Ddit4/Comt/Cavin3/Mdh2/Cox5a/Slc25a25/Dnajc15/Ndufab1/Park7/Gbe1/Uqcrq/Pfkp/Tkt/Fxn/Atpsckmt/Pomc/Pgd/Arl2/Uqcc2/Nr1d1/Mtfr1/Cox6a1/Pgls/Suclg1/Sco2/Ugp2/Fh1/Foxk2/Vcp/N…
GO:0045069	regulation of viral genome replication	83	-0.673833	-1.91757	7.87508e-06	7.87508e-06	0.000264517	2433	tags=41%, list=14%, signal=36%	Adarb1/Inpp5k/Zfp809/Shfl/Isg15/Oasl1/Ifi204/Ifitm6/Notch1/Trim6/Apobec3/Zc3hav1/Znfx1/Ifih1/Mndal/Pde12/Oas1a/Oas1g/Hmga2/Oas1c/Rnasel/Oasl2/Prox1/Ifi203/Ifitm1/Ifi207/Oas2/Rsad2/Ifi208/Ifi206/Oas3/Ifi213/Nr5a2/Ifi209
GO:0019884	antigen processing and presentation of exogenous antigen	43	-0.760828	-1.97169	8.28287e-06	8.28287e-06	0.000274975	2842	tags=63%, list=16%, signal=53%	Lgmn/Tapbp/H2-Oa/Tap2/Mr1/H2-Q7/H2-D1/B2m/Mfsd6/Unc93b1/H2-DMb1/Fcgr3/H2-DMa/Ctss/H2-Ab1/H2-Q6/Fcer1g/H2-T23/Ifi30/Mpeg1/H2-Q4/Cd74/H2-Eb1/Fcgr2b/H2-Aa/H2-DMb2/Fcgr1
GO:0048871	multicellular organismal-level homeostasis	765	-0.441723	-1.43792	8.30011e-06	8.30011e-06	0.000274975	2166	tags=21%, list=12%, signal=19%	Isg15/Gnas/Sgip1/Scd1/Gpr137b/Zc3h8/Ank1/Hfe/Acacb/Map2k6/Axl/Lpin1/Tspan9/Sp3/Zbtb18/B2m/Prlr/Pdk4/Stat4/Foxo3/Lyn/Il7r/Gja1/Acp5/Notch1/Mllt6/Nemp1/Ubash3b/Chst3/Smarca2/Ppargc1b/Bmp4/Ebf2/Itpkb/Dock10/Pkn1/Foxc1/Lgr4/Tpp1/Zfp36l1/Aim2/Stat5a/Pmaip1/Slc27a1/Vps13b/Hoxb6/Lmo1/Wnk4/Tgfbr3/Tns2/Ptgs1/Plcb1/Zfp36/Tsc22d3/Ypel4/Slc22a5/Sh2b3/Tlr4/Dll1/Flcn/Vstm4/Tmem64/Nfib/Abca3/Tspan12/Ezh1/Traf3i…
GO:0002708	positive regulation of lymphocyte mediated immunity	112	-0.640321	-1.88526	8.50666e-06	8.50666e-06	0.0002799	2692	tags=35%, list=15%, signal=30%	Tap2/Mr1/Malt1/Stat5b/H2-Q7/Rasgrp1/Shld1/H2-D1/Hfe/B2m/Lag3/Klrk1/Xcl1/Tnfsf13/Dennd1b/Stat5a/Fcgr3/Cd55/P2rx7/Nlrp3/Trem2/H2-Q6/Fcer1g/H2-T23/Il23a/H2-T24/Il1b/Cd24a/H2-Q4/Mill2/Ptprc/Nod2/Rsad2/Sash3/Cadm1/Fcgr1/Cd28/Klrd1/Gimap5
GO:0061138	morphogenesis of a branching epithelium	195	-0.567176	-1.75875	8.58796e-06	8.58796e-06	0.000280666	2009	tags=29%, list=11%, signal=26%	Pxn/Egf/Tmem67/Tgm2/Met/Notch1/Cxcl12/Bmp4/Ntn4/Lgr4/Agtr1a/Foxd1/Pml/Col4a1/Gli2/Epha2/Snai2/Gpc3/Wnt5a/Tek/Ptch1/Sema5a/Rdh10/Plxnd1/Spry2/Spry1/Tbx2/Hoxb7/Ednra/Etv5/Socs3/Hmga2/Il10/Pdgfra/Prox1/Ahr/Esr1/Wnt6/Fgf10/Cxcr4/Fgf1/Ccl11/Csmd1/Bmp7/Lef1/Flt1/Lama5/Hhex/Hhip/Eya1/Rasip1/Nrarp/Kdr/Pdgfb/Dll4/Agtr2/Tie1
GO:0002705	positive regulation of leukocyte mediated immunity	133	-0.606422	-1.8231	8.98055e-06	8.98055e-06	0.000291527	2692	tags=35%, list=15%, signal=30%	Tap2/Mr1/Malt1/Stat5b/H2-Q7/Rasgrp1/Shld1/H2-D1/Stap1/Ticam2/Hfe/B2m/Lag3/Klrk1/Xcl1/Tnfsf13/Dennd1b/Plcg2/Stat5a/Fcgr3/Cd55/P2rx7/Nlrp3/Trem2/Tyrobp/H2-Q6/Fcer1g/H2-T23/Spi1/Itgb2/Il23a/H2-T24/Il1b/Cd24a/H2-Q4/Mill2/Ptprc/Nod2/Rsad2/Sash3/Cadm1/Ptafr/Fcgr1/Cd28/Kit/Klrd1/Gimap5
GO:0001909	leukocyte mediated cytotoxicity	112	-0.63906	-1.88155	9.33252e-06	9.33252e-06	0.000300933	2692	tags=40%, list=15%, signal=34%	Tap2/Mr1/Stat5b/Rab27a/H2-Q7/Rasgrp1/H2-D1/Clec2d/Stap1/Hfe/Arrb2/B2m/Lag3/Il7r/Klrk1/Tap1/Stat5a/Klrb1a/Fcgr3/Ncf1/P2rx7/Ptpn6/Stxbp2/Tyrobp/H2-Q6/H2-T23/Pik3r6/Spi1/Il23a/Cx3cr1/H2-T24/Coro1a/Nckap1l/H2-Q4/Mill2/Ptprc/Fcgr2b/Cd2/Cadm1/Fcgr1/Fcgr4/Klrd1/Igf2/Ceacam1/Gimap5
GO:0006626	protein targeting to mitochondrion	75	0.595242	2.0352	9.66284e-06	9.66284e-06	0.000309521	3894	tags=56%, list=22%, signal=44%	Mgarp/Tomm40/Hspd1/Nol3/Hsp90aa1/Timm10/Timm8a1/Grpel1/Timm17a/Hspa4/Timm13/Timm23/Dnajc15/Timm50/Timm9/Dnlz/Timm17b/Samm50/Timm22/Pdcd5/Parl/Tomm20/Tomm5/Tomm70a/Cdkn2a/Aifm1/Bag3/Mtch1/Pmpcb/Mtch2/Fbxw7/Fis1/Bcap31/Tomm22/Ndufa13/Pam16/Timm29/Aip/Dnajc19/Mfn2/Immp2l/Lrrk2
GO:1903557	positive regulation of tumor necrosis factor superfamily cytokine production	113	-0.621555	-1.83295	1.02869e-05	1.02869e-05	0.000327343	1583	tags=36%, list=9%, signal=33%	Zbtb20/Plcg2/Il33/Fcgr3/Akap12/Tlr4/Wnt5a/Ccl4/Ifih1/Tlr3/Ccl3/Syk/Oas1a/Csf1r/Ly96/Oas1g/Clu/Tyrobp/H2-Q6/Oas1c/Fcer1g/H2-T23/Il23a/H2-Q4/Tlr1/Cd14/Lpl/Ptprc/Fcgr2b/Ccr5/Nod2/Cd2/Cd84/Oas2/Spon2/Ccr2/Cybb/Sash3/Ptafr/Oas3/Cd36
GO:0006417	regulation of translation	314	0.37808	1.57905	1.04421e-05	1.04421e-05	0.00033011	3848	tags=37%, list=22%, signal=29%	Thbs1/Pkm/Gapdh/Mvk/Eif4ebp1/Nolc1/Eif5a/Eif6/Eif3b/Serp1/Nat10/Prkca/Ybx1/Gspt1/Shmt2/Sesn2/Ifrd2/Prmt1/Etf1/Dap/Calr/Ajuba/Eif2s1/Dnajc3/Gemin5/Pus7/Bc1/Eif4e2/C1qbp/Pum3/Tsfm/Ncl/Cpeb2/Dapk3/Bzw2/Btg2/Rcc1l/Tyms/Coa3/Abce1/Pa2g4/Srp9/Rps6kb1/Uqcc2/Mpv17l2/Ptbp1/Magoh/Eif2b5/Eif4a3/Ncbp1/Tmed2/Eif1/Cdk4/Larp1/Prr16/Npm1/Eif3d/Eif4g1/Rbm3/Samd4/Hnrnpu/Caprin1/Rps3/Dnajc1/Tpr/Eif5/Eif4e/Eif4g2/Pe…
GO:0007059	chromosome segregation	379	0.359521	1.55248	1.06827e-05	1.06827e-05	0.000335524	4959	tags=41%, list=28%, signal=31%	Haus7/Anapc15/Ran/Ntmt1/Nek6/Sac3d1/Slc25a5/Cenpm/Spc24/Syce2/Stil/Pinx1/Bub1/Haus8/Flna/Brip1/Cenpx/Rangrf/Diaph3/Ccne1/Nsl1/Rcc1/Chek2/Phf10/Rrs1/Tubg1/Kpnb1/Ccne2/Cenph/Smarca4/Ddb1/Rad18/Cdc16/Cdca5/Fam83d/Cdk5rap2/Spag5/Poldip2/Ppp1r7/Anapc4/Actr3/Birc5/Syde1/Mybl2/Tubb5/Hnrnpu/Srpk1/M1ap/Smarca5/Rps3/Bcl7c/Tpr/Trip13/Senp6/Zwilch/Ciao2b/Smarcb1/Tpx2/Nudc/Ube2i/Spdl1/Smarcc1/Cenps/Dlgap5/Rcc…
GO:0002275	myeloid cell activation involved in immune response	82	-0.66497	-1.89573	1.09436e-05	1.09436e-05	0.000340976	1934	tags=40%, list=11%, signal=36%	Myo1f/Chga/Rasgrp1/Fgr/Adora2b/Lyn/Grn/Sbno2/Nmi/Plcg2/Il33/Cplx2/Gab2/Lat2/Ptpn6/Trem2/Syk/Stxbp2/Enpp3/Tyrobp/Fcer1g/Spi1/Itgb2/Lilrb4a/Rac2/Dock2/Nppc/Cd84/Ccr2/Ptafr/Cd300a/Gata2/Kit
GO:0032760	positive regulation of tumor necrosis factor production	111	-0.623691	-1.83466	1.09973e-05	1.09973e-05	0.000340976	1583	tags=37%, list=9%, signal=34%	Zbtb20/Plcg2/Il33/Fcgr3/Akap12/Tlr4/Wnt5a/Ccl4/Ifih1/Tlr3/Ccl3/Syk/Oas1a/Csf1r/Ly96/Oas1g/Clu/Tyrobp/H2-Q6/Oas1c/Fcer1g/H2-T23/Il23a/H2-Q4/Tlr1/Cd14/Lpl/Ptprc/Fcgr2b/Ccr5/Nod2/Cd2/Cd84/Oas2/Spon2/Ccr2/Cybb/Sash3/Ptafr/Oas3/Cd36
GO:0006812	monoatomic cation transport	744	-0.442833	-1.44028	1.1648e-05	1.1648e-05	0.000357617	2072	tags=19%, list=12%, signal=17%	Hfe/Atp6v0d2/Ptpn3/Abcc5/Nkain4/Arrb2/Stc1/Egf/B2m/Kcnip3/Nnt/Slc23a2/Slc10a1/Slc38a7/Lyn/Gja1/Cacna2d2/Mllt6/Ubash3b/Fxyd3/Cxcl12/Adra1a/Bmp4/Mcoln1/Xcl1/Scn2b/Hbp1/P2rx6/P2ry12/Agtr1a/Atp2b4/Akap7/Atp1b1/Plcg2/Cysltr1/Wnk4/Kcnh3/Slc36a1/Pml/Ank2/Itpr3/Tpcn1/Plcb1/Dmd/Slc38a1/Tcn2/Zfas1/Srl/Flvcr2/Slc22a5/Cacng7/Kcnj2/Epb41/Fhl1/Steap4/Dmpk/Gjc2/Slc12a6/Cav1/Nipal2/P2rx7/Mcoln2/Slc10a6/Ptpn6/Bes…
GO:0061028	establishment of endothelial barrier	47	-0.74875	-1.98781	1.16819e-05	1.16819e-05	0.000357617	839	tags=26%, list=5%, signal=24%	Ednra/Pde2a/Il1b/Rapgef3/Cldn1/Ednrb/Pecam1/Ppp1r16b/F11r/Sox18/Cdh5/Cldn5
GO:0019693	ribose phosphate metabolic process	376	0.360708	1.5548	1.21277e-05	1.21277e-05	0.000368931	3755	tags=38%, list=21%, signal=31%	Aldoc/Eno1/Pgk1/Eno1b/Pfkl/Slc2a6/Tpi1/Pgam1/Pkm/Ak4/Gapdh/Gale/Hmgcs1/Mvd/Aldoa/Pdk1/Gck/Dgat2/Galk1/Nme1/Slc27a3/Htr2a/Cda/Uck2/Ier3/Mvk/Guk1/Ran/Nme2/Eif6/Hmgcr/Nt5c/Gpi1/Acot7/Nudt19/Mthfd1/Ampd1/Adpgk/Ak1/Pdk3/Enpp1/Hif1a/Ada/Ddit4/Pmvk/Ak2/Acot4/Slc25a25/Ndufab1/Acot1/Cad/Nudt18/Gart/Pfkp/Fasn/Tkt/Umps/Gmpr2/Tspo/Atpsckmt/Mpc1/Arl2/Vdac1/Atic/Adcy2/Impdh1/Nudt11/Nudt2/Suclg1/Acsl4/Foxk2/Vcp…
GO:0002696	positive regulation of leukocyte activation	326	-0.50259	-1.60324	1.25185e-05	1.25185e-05	0.000378437	2664	tags=30%, list=15%, signal=26%	Vav3/Mef2c/Mmp14/Malt1/Stat5b/Prkcq/Ccr7/Aif1/H2-Q7/Rasgrp1/Zmiz1/Rasal3/Shld1/H2-D1/Vnn1/Gli3/Stap1/Tyk2/Ticam2/Ephb4/Axl/B2m/Prlr/Il7r/Cd86/Klrk1/Smarca2/Itpkb/Xcl1/Tnfsf13/Atp11c/Il33/Stat5a/Vsir/H2-DMb1/Irf1/Tlr4/Wnt5a/Clec4d/H2-DMa/Cd55/Hlx/Cav1/Nlrp3/Flt3l/Sox13/Trem2/Icosl/Socs1/Syk/Csf1r/Irgm1/Gpr183/Tslp/Efnb3/Tnfsf9/Cd46/Tyrobp/H2-Ab1/H2-Q6/H2-T23/Cd38/Pik3r6/Spi1/Il10/Il23a/Il15/Dock8/…
GO:0046364	monosaccharide biosynthetic process	90	0.563438	1.99981	1.26977e-05	1.26977e-05	0.000381472	2515	tags=39%, list=14%, signal=34%	Adipoq/Aldoc/Eno1/Pgk1/Tpi1/Pgam1/Erfe/Rbp4/Gapdh/Gck/Dgat2/Pgp/C1qtnf3/Gpi1/G6pc3/Sesn2/Slc39a14/Pcx/Hif1a/Mdh2/Nnmt/Supt20/Got1/Pgd/Ddb1/Serpina12/Atf4/Slc25a11/Wdr5/Gsto1/Atf3/Akr1a1/Mdh1/Per2/Ptpn2
GO:0002478	antigen processing and presentation of exogenous peptide antigen	37	-0.777124	-1.97427	1.35378e-05	1.35378e-05	0.000404198	2396	tags=70%, list=13%, signal=61%	Lgmn/Tapbp/H2-Oa/Tap2/H2-Q7/H2-D1/B2m/Mfsd6/Unc93b1/H2-DMb1/Fcgr3/H2-DMa/Ctss/H2-Ab1/H2-Q6/Fcer1g/H2-T23/Ifi30/Mpeg1/H2-Q4/Cd74/H2-Eb1/Fcgr2b/H2-Aa/H2-DMb2/Fcgr1
GO:0046640	regulation of alpha-beta T cell proliferation	55	-0.720945	-1.95605	1.38355e-05	1.38355e-05	0.000410553	2506	tags=42%, list=14%, signal=36%	Prkcq/H2-Q7/Rasal3/Sh3rf1/H2-D1/Tyk2/Twsg1/Xcl1/Vsir/Irf1/Cd55/Syk/Irgm1/H2-Q6/H2-T23/Il23a/Cd274/Cd24a/H2-Q4/Card11/Ptprc/Ccr2/Cd28
GO:0009144	purine nucleoside triphosphate metabolic process	217	0.411967	1.6638	1.43847e-05	1.43847e-05	0.000424246	3755	tags=41%, list=21%, signal=33%	Aldoc/Eno1/Pgk1/Eno1b/Pfkl/Slc2a6/Tpi1/Pgam1/Pkm/Ak4/Gapdh/Gale/Aldoa/Gck/Galk1/Nme1/Htr2a/Ier3/Guk1/Ran/Nme2/Eif6/Gpi1/Adpgk/Ak1/Enpp1/Hif1a/Ada/Ddit4/Ak2/Slc25a25/Ndufab1/Pfkp/Tspo/Atpsckmt/Arl2/Impdh1/Nudt2/Foxk2/Vcp/Ndufb8/Ndufa8/Ndufb10/Ndufb6/Impdh2/Map2k1/Ola1/Hk1/Ndufs7/Sdhb/Nudt5/Hspa8/Ndufs3/Ndufs8/Itpa/Ndufa11/Ndufs5/Ndufs4/Parp1/Nme6/Ndufb9/Ndufb7/Ndufv1/Rhoq/Rab23/Mtch2/Sdhd/Efl1/Ndu…
GO:0009259	ribonucleotide metabolic process	364	0.363424	1.54637	1.47601e-05	1.47601e-05	0.000432679	3546	tags=37%, list=20%, signal=30%	Aldoc/Eno1/Pgk1/Eno1b/Pfkl/Slc2a6/Tpi1/Pgam1/Pkm/Ak4/Gapdh/Gale/Hmgcs1/Mvd/Aldoa/Pdk1/Gck/Dgat2/Galk1/Nme1/Slc27a3/Htr2a/Cda/Uck2/Ier3/Mvk/Guk1/Ran/Nme2/Eif6/Hmgcr/Nt5c/Gpi1/Acot7/Nudt19/Mthfd1/Ampd1/Adpgk/Ak1/Pdk3/Enpp1/Hif1a/Ada/Ddit4/Pmvk/Ak2/Acot4/Slc25a25/Ndufab1/Acot1/Cad/Nudt18/Gart/Pfkp/Fasn/Umps/Gmpr2/Tspo/Atpsckmt/Mpc1/Arl2/Vdac1/Atic/Adcy2/Impdh1/Nudt11/Nudt2/Suclg1/Acsl4/Foxk2/Vcp/Ndu…
GO:0032635	interleukin-6 production	158	-0.576784	-1.76618	1.49289e-05	1.49289e-05	0.000434991	2093	tags=30%, list=12%, signal=27%	Ticam2/Arrb2/Tlr2/Adora2b/Met/Cd300ld/Unc93b1/Zbtb20/Plcg2/Il33/Cd200/Tlr4/Prg4/Wnt5a/Ifih1/Tlr3/P2rx7/Ptpn6/Trem2/Arrb1/Syk/Tslp/Tnfsf9/Defb25/Tyrobp/Trim30a/Fcer1g/Laptm5/Il10/Il17d/Il1b/Nckap1l/Cd24a/Tlr1/Nos2/Inpp5d/Cd74/Lpl/Lilrb4a/Il16/Ccr5/Nod2/Cd84/Tlr7/Spon2/Ptafr/Cd36/Afap1l2
GO:0030335	positive regulation of cell migration	552	-0.457791	-1.48349	1.5404e-05	1.5404e-05	0.000446147	1947	tags=24%, list=11%, signal=22%	Tlr2/Adora2b/Fbln1/Lyn/Met/Cxcl14/Ptn/Rin2/Vegfc/Acp5/Notch1/Dab2/Amot/Cxcl12/Bmp4/Amotl1/Itga3/Xcl1/Synpo2/Grn/Irs1/Smad3/Mmp2/P2ry12/Sash1/Plcg2/Myoc/Stat5a/Tgfbr3/Vsir/Il34/Smoc2/P2ry6/Gpnmb/Gab2/Sema3f/Epha2/Snai2/Alox12/Akap12/Tlr4/Pld1/Cd151/C3ar1/Syne2/Wnt5a/Tek/Sema6a/Vtn/Cav1/Shtn1/Sema5a/Rapgef4/Trem2/Sema6b/Fermt3/Spry2/Csf1r/Ssh2/Cxcl10/Camk1d/Ednra/Defb25/Sema6d/Gcnt2/Gpld1/Plp1/Sema…
GO:0046631	alpha-beta T cell activation	180	-0.575473	-1.77344	1.58371e-05	1.58371e-05	0.000455963	2574	tags=32%, list=14%, signal=27%	Malt1/Prkcq/Atf2/Ccr7/Pla2g2d/H2-Q7/Rasal3/Sh3rf1/H2-D1/Cracr2a/Gli3/Tyk2/Hfe/Bcl3/Stat4/Twsg1/Psap/Itpkb/Xcl1/Vsir/Irf1/Igtp/Satb1/Cd55/Hlx/Nlrp3/Socs1/Syk/Irgm1/Gpr183/H2-Ab1/H2-Q6/H2-T23/Il23a/Il15/Cd274/Batf/Nckap1l/Cd24a/Prdm1/H2-Q4/Il2rg/Card11/Nfkbid/Lilrb4a/Dock2/Ptprc/Rsad2/Ly9/Ccr2/Sash3/Cd300a/Cd83/Cd28/Lef1/Gimap5/Gimap1
GO:0050867	positive regulation of cell activation	346	-0.500644	-1.60603	1.65702e-05	1.65702e-05	0.000474245	2664	tags=30%, list=15%, signal=26%	Vav3/Mef2c/Mmp14/Malt1/Stat5b/Prkcq/Ccr7/Aif1/H2-Q7/Rasgrp1/Zmiz1/Rasal3/Shld1/H2-D1/Vnn1/Gli3/Ddr2/Stap1/Tyk2/Ticam2/Ephb4/Axl/B2m/Prlr/Rps6ka1/Il7r/Cd86/Klrk1/Smarca2/Itpkb/Xcl1/Tnfsf13/Pear1/Atp11c/Il33/Stat5a/Vsir/H2-DMb1/Irf1/Tlr4/Wnt5a/Clec4d/H2-DMa/Cd55/Hlx/Cav1/Nlrp3/Flt3l/Sox13/Trem2/Icosl/Socs1/Syk/Csf1r/Irgm1/Gpr183/Tslp/Efnb3/Tnfsf9/Cd46/Tyrobp/H2-Ab1/H2-Q6/H2-T23/Cd38/Pik3r6/Spi1/Il1…
GO:0048754	branching morphogenesis of an epithelial tube	162	-0.58029	-1.7786	1.69273e-05	1.69273e-05	0.000481614	2009	tags=31%, list=11%, signal=28%	Pxn/Egf/Tmem67/Met/Notch1/Cxcl12/Bmp4/Lgr4/Agtr1a/Foxd1/Pml/Col4a1/Gli2/Epha2/Gpc3/Wnt5a/Tek/Ptch1/Sema5a/Rdh10/Plxnd1/Spry2/Spry1/Tbx2/Hoxb7/Ednra/Etv5/Hmga2/Pdgfra/Ahr/Esr1/Wnt6/Fgf10/Cxcr4/Fgf1/Ccl11/Csmd1/Bmp7/Lef1/Flt1/Lama5/Hhex/Hhip/Eya1/Rasip1/Nrarp/Kdr/Dll4/Agtr2/Tie1
GO:0009185	ribonucleoside diphosphate metabolic process	115	0.505858	1.85675	1.77806e-05	1.77806e-05	0.000502937	1079	tags=25%, list=6%, signal=24%	Aldoc/Eno1/Pgk1/Eno1b/Pfkl/Slc2a6/Tpi1/Pgam1/Pkm/Ak4/Gapdh/Gale/Aldoa/Gck/Galk1/Htr2a/Ier3/Guk1/Eif6/Gpi1/Adpgk/Ak1/Enpp1/Hif1a/Ddit4/Ak2/Cad/Nudt18/Pfkp
GO:0062207	regulation of pattern recognition receptor signaling pathway	155	-0.57831	-1.76453	1.80597e-05	1.80597e-05	0.000507859	2531	tags=30%, list=14%, signal=26%	Peli3/Gpatch3/Slc46a2/Nr1h3/Lamp2/Ticam2/Arrb2/Oasl1/Lyn/Ifi204/Slc15a2/Rnf125/Lgr4/Plcg2/Dhx58/Zc3hav1/Irf1/Slc15a3/Tlr4/Igtp/Casp4/Cav1/Fbxl2/Mndal/Trem2/Irf7/Irgm2/Appl2/Irgm1/Trim30a/Pik3ap1/Ifi203/Esr1/Gbp2/Tlr1/Cd14/Ddx60/Nod2/Ifi207/Rsad2/Ifi208/Cd300a/Ifi206/Gbp5/Cd36/Ifi213/Ifi209
GO:0035966	response to topologically incorrect protein	122	0.490642	1.80337	1.83706e-05	1.83706e-05	0.000513617	4253	tags=51%, list=24%, signal=39%	Thbs1/Stc2/Manf/Sdf2l1/Hspa5/Hspb1/Thbs4/Rnf126/Hspd1/Pdia6/Comp/Serp1/Hsp90aa1/Creb3l3/Eif2s1/Dnajc3/Tbl2/Bok/Selenos/Hspb8/Creb3/Xbp1/Ube2j2/Derl1/Tmed2/Hsph1/Atf4/Vcp/Dnajb9/Bax/Stub1/Derl2/Ubxn4/Bag3/Atf3/Chac1/Ddrgk1/Ptpn2/Bak1/Dnajb14/Ppp1r15a/Stt3b/Hsf1/Edem1/Atf6/Erlec1/Cdk5rap3/Herpud1/Serp2/Erp44/Faf2/Cops5/Mfn2/Syvn1/Tram1/Ufd1/Jkamp/Edem2/Eif2ak4/Edem3/Ptpn1/Wfs1
GO:0032675	regulation of interleukin-6 production	150	-0.585663	-1.77845	1.84775e-05	1.84775e-05	0.000513638	2093	tags=32%, list=12%, signal=28%	Ticam2/Arrb2/Tlr2/Adora2b/Met/Cd300ld/Unc93b1/Zbtb20/Plcg2/Il33/Cd200/Tlr4/Prg4/Wnt5a/Ifih1/Tlr3/P2rx7/Ptpn6/Trem2/Arrb1/Syk/Tslp/Tnfsf9/Defb25/Tyrobp/Trim30a/Fcer1g/Laptm5/Il10/Il17d/Il1b/Nckap1l/Cd24a/Tlr1/Nos2/Inpp5d/Cd74/Lpl/Lilrb4a/Il16/Ccr5/Nod2/Cd84/Tlr7/Spon2/Ptafr/Cd36/Afap1l2
GO:0043408	regulation of MAPK cascade	612	-0.444083	-1.44159	1.8701e-05	1.8701e-05	0.00051688	2414	tags=24%, list=14%, signal=22%	Fktn/Nbr1/Rasgrp1/Inpp5k/C1qtnf2/Spred1/Thpo/Sh3rf1/Ccl9/Cracr2a/Vangl2/Gsdme/C1qtnf1/Ddr2/Ece1/Insr/Trim5/Map2k6/Shc1/Arrb2/Egf/Tlr2/Fbln1/Lyn/Efna1/Met/Gsn/Dixdc1/Notch1/Dab2/Itga1/Taok2/Cxcl12/Adra1a/Bmp4/Psap/Xcl1/Spred2/Sash1/Pik3r2/Plcg2/Dynlt1b/Map3k5/Myoc/Dok4/Il34/Trim12c/P2ry6/Plcb1/Gpnmb/Dmd/Epha2/Trim30d/Sh2b3/Akap12/Tlr4/Flcn/Syngap1/Map3k1/Mturn/Notch2/Wnt5a/Trim12a/Dok2/Tek/Ccl4/Se…
GO:0008285	negative regulation of cell population proliferation	647	-0.451526	-1.46527	1.92441e-05	1.92441e-05	0.000528868	1947	tags=21%, list=11%, signal=19%	Tlr2/Adora2b/Sh3bp4/Zeb1/Fbln1/Lyn/Ptn/Gja1/Notch1/Dab2/Nr2f2/Cd86/Zfp503/Twsg1/Itga1/Lst1/Rian/Smarca2/Cxcl12/Bmp4/Sox11/Smad3/Pkn1/Dis3l2/Ptprk/Ift80/Myod1/Nmi/Il33/Pmaip1/Tgfbr3/Vsir/Tns2/Pml/Gpnmb/Cd200/Zfas1/Tfap4/Snai2/Sh2b3/Dll1/Fap/Flcn/Bmp5/Jarid2/Gpc3/Ripply3/Wnt5a/Nfib/Cav1/Hpgds/Ptch1/Mtss1/Ptpn6/Ndrg2/Slfn2/Trem2/Gas1/Socs1/Trp53inp1/Rarb/Spry2/Spry1/Csf1r/Lrrc32/Cd37/Appl2/Irgm1/Npr…
GO:0002237	response to molecule of bacterial origin	270	-0.523166	-1.6563	1.9478e-05	1.9478e-05	0.000529607	2202	tags=31%, list=12%, signal=27%	Cr2/Shpk/Stap1/Ticam2/Trim5/Axl/B2m/Tlr2/Lyn/Acp5/Cd86/Klrk1/Sash1/Sbno2/Plcg2/Trim6/Trim12c/Zfp36/Trim30d/Tlr4/Igtp/Wnt5a/Trim12a/Casp4/Ncf2/Cd55/Irf5/Scarb1/P2rx7/Nlrp3/Mrc1/Trem2/Cxcl9/Ly96/Irgm2/Cxcl10/Irgm1/Cd68/Ednra/Defb25/Plscr4/Ogt/Trim30a/Cd180/Tnfrsf11a/Pde2a/Ptgir/Spi1/Il10/Cx3cr1/Cd274/Ahr/Il1b/Cd24a/Cfh/Gbp2/Tlr1/Nos2/Cd14/Lilrb4a/C5ar1/Slc11a1/Ace/Tifab/Irf8/Gbp3/Fcgr2b/Abca1/Nod2/…
GO:0046635	positive regulation of alpha-beta T cell activation	80	-0.657111	-1.85994	1.949e-05	1.949e-05	0.000529607	2574	tags=42%, list=14%, signal=37%	Malt1/Prkcq/Ccr7/H2-Q7/Rasal3/H2-D1/Gli3/Tyk2/Itpkb/Xcl1/Irf1/Cd55/Hlx/Nlrp3/Socs1/Syk/Irgm1/H2-Ab1/H2-Q6/H2-T23/Il23a/Nckap1l/Cd24a/H2-Q4/Il2rg/Card11/Nfkbid/Lilrb4a/Ptprc/Ccr2/Sash3/Cd83/Cd28/Gimap5
GO:0034220	monoatomic ion transmembrane transport	649	-0.448128	-1.45477	2.09297e-05	2.09297e-05	0.000565551	1808	tags=16%, list=10%, signal=15%	Ubash3b/Fxyd3/Adra1a/Bmp4/Mcoln1/Xcl1/Scn2b/P2rx6/P2ry12/Agtr1a/Atp2b4/Akap7/Atp1b1/Calhm5/Plcg2/Wnk4/Kcnh3/Slc36a1/Pml/Ank2/Itpr3/Tpcn1/Plcb1/Dmd/Tcn2/Zfas1/Cacng7/Kcnj2/Fhl1/Steap4/Lrrc8c/Gjc2/Slc12a6/Cav1/P2rx7/Mcoln2/Ptpn6/Best1/Kcnq4/Steap3/Kcnh2/Trem2/Cxcl9/Klhl24/Ctss/Agrn/Cxcl10/Mrln/Ednra/Slc24a5/Rem1/Kcnb1/Kcnt2/Nr3c2/Slc8b1/Plp1/Scara5/Kcna1/Ahr/Coro1a/Atp2a1/Cacna1h/Rapgef3/Tmc8/Tmem3…
GO:0042255	ribosome assembly	61	0.615153	2.067	2.12345e-05	2.12345e-05	0.000570599	3562	tags=51%, list=20%, signal=41%	Bop1/Mrto4/Eif6/Dhx29/Rrp7a/Mrps7/Ppan/Mrpl20/Nop2/C1qbp/Nle1/Mdn1/Brix1/Nip7/Rrs1/Rpsa/Rpf2/Mpv17l2/Noa1/Rplp0/Eif5/Rps5/Rpl11/Eif5b/Xrcc5/Efl1/Rps27l/Dhx37/Rps19/Abt1/Rps6
GO:0006096	glycolytic process	92	0.548401	1.93928	2.14691e-05	2.14691e-05	0.000573716	766	tags=24%, list=4%, signal=23%	Aldoc/Eno1/Pgk1/Eno1b/Pfkl/Slc2a6/Tpi1/Pgam1/Pkm/Gapdh/Gale/Aldoa/Gck/Galk1/Htr2a/Ier3/Eif6/Gpi1/Adpgk/Enpp1/Hif1a/Ddit4
GO:0006006	glucose metabolic process	185	0.440229	1.7428	2.17928e-05	2.17928e-05	0.000579166	1731	tags=23%, list=10%, signal=21%	Adipoq/Aldoc/Eno1/Pgk1/Eno1b/Fabp5/Pfkl/Tpi1/Pgam1/Ldha/Pkm/Erfe/Rbp4/Gapdh/Aldoa/Pdk1/Gck/Dgat2/Pgp/C1qtnf3/Pgm1/Serp1/Gpi1/G6pc3/Sesn2/Slc39a14/Adpgk/Pcx/Pdk3/Hif1a/Mdh2/Nnmt/Pfkp/Fbn1/Supt20/Got1/Ddb1/Serpina12/Atf4/Slc25a11/Foxk2/Pgm2
GO:0001562	response to protozoan	39	-0.767179	-1.96654	2.19966e-05	2.19966e-05	0.000581389	927	tags=44%, list=5%, signal=41%	Igtp/Cd37/Irgm2/Il10/Gbp7/Batf/Gbp2/Slc11a1/Irf8/Gbp3/Iigp1/Gbp6/Gbp9/Tgtp2/Gbp8/Tgtp1/Gbp4
GO:2000147	positive regulation of cell motility	568	-0.454363	-1.47339	2.24471e-05	2.24471e-05	0.000590072	1947	tags=23%, list=11%, signal=21%	Tlr2/Adora2b/Fbln1/Lyn/Met/Cxcl14/Ptn/Rin2/Vegfc/Acp5/Notch1/Dab2/Amot/Cxcl12/Bmp4/Amotl1/Itga3/Xcl1/Synpo2/Grn/Irs1/Smad3/Mmp2/P2ry12/Sash1/Plcg2/Cavin1/Myoc/Stat5a/Tgfbr3/Vsir/Il34/Smoc2/P2ry6/Gpnmb/Gab2/Sema3f/Epha2/Snai2/Alox12/Akap12/Tlr4/Pld1/Cd151/C3ar1/Syne2/Wnt5a/Tek/Sema6a/Vtn/Cav1/Ntn1/Shtn1/Sema5a/Rapgef4/Trem2/Sema6b/Fermt3/Spry2/Csf1r/Ssh2/Cxcl10/Camk1d/Ednra/Defb25/Sema6d/Gcnt2/Gpl…
GO:0002886	regulation of myeloid leukocyte mediated immunity	67	-0.682599	-1.90616	2.32647e-05	2.32647e-05	0.000608257	2396	tags=40%, list=13%, signal=35%	H2-Q7/Fgr/H2-D1/Stap1/Ticam2/Adora2b/Lyn/Fcgr3/Gab2/Syk/Stxbp2/Tyrobp/H2-Q6/Fcer1g/H2-T23/Spi1/Itgb2/Cx3cr1/H2-Q4/Rac2/Nppc/Cd84/Ccr2/Ptafr/Fcgr1/Cd300a/Gata2
GO:0006119	oxidative phosphorylation	111	0.50566	1.83444	2.34242e-05	2.34242e-05	0.000609135	4240	tags=57%, list=24%, signal=44%	Ak4/Cox7a1/Cox4i2/Shmt2/Cycs/Gadd45gip1/Cox5a/Dnajc15/Ndufab1/Park7/Uqcrq/Fxn/Atpsckmt/Uqcc2/Cox6a1/Vcp/Ndufb8/Ndufa8/Ndufb10/Cyc1/Ndufb6/Ndufs7/Chchd2/Sdhb/Ndufs3/Slc25a33/Ndufs8/Cdk1/Coq9/Ndufa11/Ndufs5/Ndufs4/Ndufb9/Ndufb7/Ndufv1/Mtch2/Sdhd/Ndufb11/Uqcrc1/Ndufs6/Ndufb2/Bdnf/Stoml2/Cox5b/Nupr1/Ndufa13/Dnajc30/Coq7/Myc/Ndufa9/Ndufv3/Uqcr11/Ndufv2/Ndufs2/Ndufa12/Rhoa/Ndufa5/Ndufa10/Ndufb4/Msh2/Uq…
GO:0006986	response to unfolded protein	107	0.522244	1.87526	2.36951e-05	2.36951e-05	0.000612884	4253	tags=53%, list=24%, signal=41%	Thbs1/Stc2/Manf/Hspa5/Hspb1/Thbs4/Hspd1/Pdia6/Comp/Serp1/Hsp90aa1/Creb3l3/Eif2s1/Dnajc3/Tbl2/Bok/Selenos/Hspb8/Creb3/Xbp1/Ube2j2/Derl1/Tmed2/Hsph1/Atf4/Dnajb9/Bax/Stub1/Derl2/Ubxn4/Bag3/Atf3/Chac1/Ddrgk1/Ptpn2/Bak1/Ppp1r15a/Stt3b/Hsf1/Edem1/Atf6/Erlec1/Cdk5rap3/Herpud1/Serp2/Erp44/Faf2/Cops5/Mfn2/Syvn1/Tram1/Jkamp/Edem2/Eif2ak4/Edem3/Ptpn1/Wfs1
GO:0051251	positive regulation of lymphocyte activation	299	-0.507854	-1.61539	2.38802e-05	2.38802e-05	0.000614388	2664	tags=30%, list=15%, signal=26%	Vav3/Mef2c/Mmp14/Malt1/Stat5b/Prkcq/Ccr7/Aif1/H2-Q7/Rasgrp1/Zmiz1/Rasal3/Shld1/H2-D1/Vnn1/Gli3/Tyk2/Ticam2/Ephb4/Axl/B2m/Prlr/Il7r/Cd86/Smarca2/Itpkb/Xcl1/Tnfsf13/Atp11c/Stat5a/Vsir/H2-DMb1/Irf1/Tlr4/H2-DMa/Cd55/Hlx/Cav1/Nlrp3/Flt3l/Sox13/Icosl/Socs1/Syk/Csf1r/Irgm1/Gpr183/Efnb3/Tnfsf9/Cd46/Tyrobp/H2-Ab1/H2-Q6/H2-T23/Cd38/Pik3r6/Spi1/Il10/Il23a/Il15/Dock8/Cd274/Coro1a/Il1b/Nckap1l/Cd24a/H2-Q4/Il2…
GO:0002707	negative regulation of lymphocyte mediated immunity	57	-0.69615	-1.89567	2.40788e-05	2.40788e-05	0.000616219	2396	tags=40%, list=13%, signal=35%	H2-Q7/H2-D1/Clec2d/Cr2/Hfe/Arrb2/Il7r/Tap1/Vsir/Ptpn6/Cd46/H2-Q6/H2-T23/Ahr/Nckap1l/H2-Q4/Lilrb4a/Ptprc/Fcgr2b/Nod2/Klrd1/Igf2/Ceacam1
GO:0031341	regulation of cell killing	91	-0.637295	-1.82113	2.44503e-05	2.44503e-05	0.000622433	2692	tags=44%, list=15%, signal=38%	Tap2/Mr1/Stat5b/H2-Q7/Rasgrp1/H2-D1/Clec2d/Stap1/Hfe/Arrb2/B2m/Lag3/Il7r/Klrk1/Tap1/Stat5a/Klrb1a/Cd55/P2rx7/Syk/Tyrobp/H2-Q6/H2-T23/Pik3r6/Spi1/Il23a/Cx3cr1/H2-T24/Nckap1l/H2-Q4/Mill2/Cfh/Nos2/Ptprc/Ccr5/Cadm1/Klrd1/Igf2/Ceacam1/Gimap5
GO:1902105	regulation of leukocyte differentiation	310	-0.502104	-1.60092	2.62694e-05	2.62694e-05	0.000665242	2875	tags=34%, list=16%, signal=29%	Ripk1/Itgb3/Slamf8/Rara/H2-Oa/Zc3h12a/Smarcd2/Asxl2/Mmp14/Fos/Malt1/Mafb/Stat5b/Cdk6/Ccr7/Rasgrp1/Slc46a2/Zmiz1/Sh3rf1/Clec2d/Ccl9/Vnn1/Fbxo7/Gli3/Gnas/Gpr137b/Zc3h8/Axl/Lag3/Zfp608/Zeb1/Lyn/Il7r/Ubash3b/Smarca2/Ppargc1b/Bmp4/Itpkb/Atp11c/Zfp36l1/Stat5a/Vsir/Il34/Nfam1/Irf1/Sh2b3/Notch2/Tmem64/H2-DMa/Hlx/Nlrp3/Flt3l/Ccl3/Ptpn6/Sox13/Trem2/Socs1/Syk/C1qc/Csf1r/Zbtb46/Tnfsf9/Cd46/Mitf/Tyrobp/Prxl2a…
GO:0045446	endothelial cell differentiation	109	-0.632501	-1.85984	2.74539e-05	2.74539e-05	0.000691615	2062	tags=29%, list=12%, signal=26%	Foxj2/Stc1/Zeb1/Met/Notch1/Nr2f2/Bmp4/Plcb1/Dmd/Dll1/Tmem100/Ednra/Pde2a/Prox1/Acvr2b/Il1b/Apold1/Rapgef3/Xdh/Cxcr4/Col18a1/Cldn1/Ednrb/Pecam1/Ppp1r16b/F11r/Sox18/Kdr/Ceacam1/Cdh5/Cldn5/Tie1
GO:0071216	cellular response to biotic stimulus	210	-0.545614	-1.70269	2.92884e-05	2.92884e-05	0.000734008	2202	tags=34%, list=12%, signal=30%	Cr2/Shpk/Stap1/Ticam2/Trim5/Axl/B2m/Tlr2/Lyn/Notch1/Cd86/Klrk1/Sash1/Sbno2/Plcg2/Trim12c/Zfp36/Trim30d/Tlr4/Igtp/Notch2/Wnt5a/Trim12a/Cd55/Nlrp3/Mrc1/Trem2/Cxcl9/Syk/Ly96/Bcl2l11/Irgm2/Cxcl10/Irgm1/Cd68/Defb25/Plscr4/Ogt/Trim30a/Cd180/Txnip/Pde2a/Spi1/Il10/Cx3cr1/Cd274/Ahr/Il1b/Cfh/Gbp2/Tlr1/Nos2/Cd14/Lilrb4a/Tifab/Irf8/Gbp3/Fcgr2b/Abca1/Nod2/Cd84/Nos3/Tnip3/Spon2/Cd300lb/Gbp6/Ly86/Cmpk2/Gbp5/Cd3…
GO:0002440	production of molecular mediator of immune response	247	-0.526886	-1.6621	2.98105e-05	2.98105e-05	0.000743241	2093	tags=26%, list=12%, signal=24%	Ticam2/Hfe/Axl/Polm/B2m/Tlr2/Il7r/Acp5/Cd86/Ppl/Xcl1/Pkn1/Tnfsf13/Dennd1b/Plcg2/Trim6/Il33/Mzb1/Vsir/Gprc5b/Itm2a/Tlr4/Wnt5a/Casp4/Slamf9/Tek/Cd55/Irf5/Traf3ip2/Tlr3/P2rx7/Nlrp3/Tril/Icosl/Syk/Cd37/H2-Ab1/H2-Q6/Fcer1g/H2-T23/Laptm5/Il10/Batf/Il1b/Fgl2/H2-Q4/Card11/Cd74/Lilrb4a/Slc11a1/Cd22/Ptprc/Fcgr2b/Nod2/Rsad2/Tlr7/Spon2/Ccr2/Sash3/Cd28/Ighm/Kit/Cd36/Fcgr4/Gimap5
GO:0030001	metal ion transport	687	-0.443693	-1.44189	3.12752e-05	3.12752e-05	0.000775759	2072	tags=19%, list=12%, signal=18%	Hfe/Ptpn3/Abcc5/Nkain4/Arrb2/Stc1/Egf/B2m/Kcnip3/Slc23a2/Slc10a1/Slc38a7/Lyn/Gja1/Cacna2d2/Mllt6/Ubash3b/Fxyd3/Cxcl12/Adra1a/Bmp4/Mcoln1/Xcl1/Scn2b/Hbp1/P2rx6/P2ry12/Agtr1a/Atp2b4/Akap7/Atp1b1/Plcg2/Cysltr1/Wnk4/Kcnh3/Pml/Ank2/Itpr3/Tpcn1/Plcb1/Dmd/Slc38a1/Tcn2/Zfas1/Srl/Flvcr2/Slc22a5/Cacng7/Kcnj2/Epb41/Fhl1/Steap4/Dmpk/Gjc2/Slc12a6/Cav1/Nipal2/P2rx7/Mcoln2/Slc10a6/Ptpn6/Best1/Kcnq4/Steap3/Kcnh2…
GO:0001818	negative regulation of cytokine production	264	-0.523325	-1.65602	3.14455e-05	3.14455e-05	0.000776005	2093	tags=27%, list=12%, signal=24%	Ticam2/Hfe/Axl/Arrb2/Bcl3/Tlr2/Lag3/Fbln1/Met/Abcd2/Acp5/Rnf125/Trib2/Twsg1/Lgr4/Nmi/Il33/Dhx58/Vsir/Pml/Gpnmb/Zfp36/Epha2/Cd200/Tlr4/Dll1/Prg4/Igtp/Xaf1/Nlrp3/Cd34/Ptpn6/Ndrg2/Trem2/Arrb1/Oas1a/Lrrc32/Irgm2/Appl2/Irgm1/Oas1g/Serpinb1b/Tyrobp/Trim30a/Oas1c/Tnfrsf21/Fgfr4/Laptm5/Il10/Il23a/Cx3cr1/Cd274/Nckap1l/Cd24a/Srgn/Inpp5d/Lilrb4a/Pglyrp1/Slc11a1/Ptprc/Fcgr2b/Nod2/Apod/Cd84/Sigirr/Cd83/Lef1/F…
GO:0019318	hexose metabolic process	217	0.402483	1.62549	3.28839e-05	3.28839e-05	0.000807382	1656	tags=20%, list=9%, signal=19%	Adipoq/Aldoc/Eno1/Pgk1/Eno1b/Fabp5/Pfkl/Tpi1/Pgam1/Ldha/Pkm/Erfe/Rbp4/Gapdh/Gale/Aldoa/Pdk1/Gck/Dgat2/Pgp/Galk1/C1qtnf3/Pgm1/Serp1/Gpi1/G6pc3/Sesn2/Slc39a14/Adpgk/Pcx/Pdk3/Hif1a/Mdh2/Fuom/Nnmt/Pfkp/Fbn1/Supt20/Got1/Ddb1/Serpina12/Atf4/Slc25a11/Foxk2
GO:0098742	cell-cell adhesion via plasma-membrane adhesion molecules	160	-0.570432	-1.75173	3.33604e-05	3.33604e-05	0.000814944	668	tags=16%, list=4%, signal=16%	Prtg/Sele/Il10/Mcam/Pcdh17/Selp/Cd24a/Hmcn1/Cdh19/Sparcl1/Itga4/Itgal/Cadm1/Cldn1/Tenm4/Tenm2/Cldn2/Scarf1/Hmcn2/Pcdh12/Pcdh1/Cdh13/Pecam1/Ceacam1/Cdh5/Esam
GO:0071219	cellular response to molecule of bacterial origin	185	-0.555053	-1.71288	3.37219e-05	3.37219e-05	0.000816754	2202	tags=36%, list=12%, signal=32%	Cr2/Shpk/Stap1/Ticam2/Trim5/Axl/B2m/Tlr2/Lyn/Cd86/Klrk1/Sash1/Sbno2/Plcg2/Trim12c/Zfp36/Trim30d/Tlr4/Igtp/Wnt5a/Trim12a/Cd55/Nlrp3/Mrc1/Trem2/Cxcl9/Ly96/Irgm2/Cxcl10/Irgm1/Cd68/Defb25/Plscr4/Ogt/Trim30a/Cd180/Pde2a/Spi1/Il10/Cx3cr1/Cd274/Ahr/Il1b/Cfh/Gbp2/Tlr1/Nos2/Cd14/Lilrb4a/Tifab/Irf8/Gbp3/Fcgr2b/Abca1/Nod2/Cd84/Nos3/Tnip3/Spon2/Cd300lb/Gbp6/Ly86/Cmpk2/Gbp5/Cd36/Fcgr4
GO:0002720	positive regulation of cytokine production involved in immune response	82	-0.649367	-1.85125	3.37722e-05	3.37722e-05	0.000816754	2093	tags=40%, list=12%, signal=36%	Ticam2/B2m/Tlr2/Xcl1/Dennd1b/Plcg2/Trim6/Gprc5b/Tlr4/Wnt5a/Casp4/Tek/Cd55/Irf5/Tlr3/P2rx7/Nlrp3/Syk/H2-Q6/Fcer1g/H2-T23/Laptm5/Il1b/H2-Q4/Cd74/Nod2/Rsad2/Tlr7/Spon2/Sash3/Kit/Cd36/Gimap5
GO:1902107	positive regulation of leukocyte differentiation	189	-0.550653	-1.70227	3.53833e-05	3.53833e-05	0.000847245	2875	tags=35%, list=16%, signal=30%	Ripk1/Itgb3/Rara/Smarcd2/Asxl2/Mmp14/Fos/Malt1/Stat5b/Ccr7/Rasgrp1/Zmiz1/Ccl9/Vnn1/Gli3/Gnas/Axl/Il7r/Smarca2/Ppargc1b/Itpkb/Atp11c/Zfp36l1/Stat5a/Vsir/Il34/Irf1/Notch2/Tmem64/H2-DMa/Hlx/Nlrp3/Flt3l/Ccl3/Sox13/Trem2/Socs1/Syk/Csf1r/Zbtb46/Tnfsf9/Cd46/Tyrobp/Tnfrsf11a/Pik3r6/Spi1/Il10/Il23a/Il15/Ikzf1/Nckap1l/Il2rg/Nfkbid/Inpp5d/Cd74/Lilrb4a/Hcls1/Ptprc/H2-Aa/Ccr2/Kitl/Sash3/Cd83/Lef1/Tesc/Dlk1/Gi…
GO:1903708	positive regulation of hemopoiesis	189	-0.550653	-1.70227	3.53833e-05	3.53833e-05	0.000847245	2875	tags=35%, list=16%, signal=30%	Ripk1/Itgb3/Rara/Smarcd2/Asxl2/Mmp14/Fos/Malt1/Stat5b/Ccr7/Rasgrp1/Zmiz1/Ccl9/Vnn1/Gli3/Gnas/Axl/Il7r/Smarca2/Ppargc1b/Itpkb/Atp11c/Zfp36l1/Stat5a/Vsir/Il34/Irf1/Notch2/Tmem64/H2-DMa/Hlx/Nlrp3/Flt3l/Ccl3/Sox13/Trem2/Socs1/Syk/Csf1r/Zbtb46/Tnfsf9/Cd46/Tyrobp/Tnfrsf11a/Pik3r6/Spi1/Il10/Il23a/Il15/Ikzf1/Nckap1l/Il2rg/Nfkbid/Inpp5d/Cd74/Lilrb4a/Hcls1/Ptprc/H2-Aa/Ccr2/Kitl/Sash3/Cd83/Lef1/Tesc/Dlk1/Gi…
GO:0098662	inorganic cation transmembrane transport	544	-0.449636	-1.45735	3.60362e-05	3.60362e-05	0.000857837	2082	tags=19%, list=12%, signal=17%	Ank1/Atp6v0d2/Ptpn3/Abcc5/Kcnip3/Nnt/Slc23a2/Lyn/Cacna2d2/Ubash3b/Fxyd3/Adra1a/Bmp4/Mcoln1/Xcl1/Scn2b/P2rx6/P2ry12/Agtr1a/Atp2b4/Akap7/Atp1b1/Plcg2/Wnk4/Kcnh3/Slc36a1/Pml/Ank2/Itpr3/Tpcn1/Plcb1/Dmd/Tcn2/Zfas1/Cacng7/Kcnj2/Fhl1/Steap4/Gjc2/Slc12a6/Cav1/P2rx7/Mcoln2/Ptpn6/Kcnq4/Steap3/Kcnh2/Trem2/Cxcl9/Klhl24/Agrn/Cxcl10/Mrln/Ednra/Slc24a5/Rem1/Kcnb1/Kcnt2/Nr3c2/Slc8b1/Plp1/Scara5/Kcna1/Ahr/Coro1a/…
GO:0046031	ADP metabolic process	100	0.520567	1.86628	3.61804e-05	3.61804e-05	0.000857837	855	tags=24%, list=5%, signal=23%	Aldoc/Eno1/Pgk1/Eno1b/Pfkl/Slc2a6/Tpi1/Pgam1/Pkm/Gapdh/Gale/Aldoa/Gck/Galk1/Htr2a/Ier3/Eif6/Gpi1/Adpgk/Ak1/Enpp1/Hif1a/Ddit4/Ak2
GO:0006007	glucose catabolic process	26	0.782847	2.21061	3.64253e-05	3.64253e-05	0.000859431	485	tags=42%, list=3%, signal=41%	Eno1/Pgk1/Eno1b/Pfkl/Tpi1/Ldha/Pkm/Gapdh/Aldoa/Gck/Gpi1
GO:0045055	regulated exocytosis	204	-0.536409	-1.66786	3.6614e-05	3.6614e-05	0.00085969	2448	tags=24%, list=14%, signal=21%	Rab27a/Cacna1b/Chga/Rasgrp1/Fgr/Orai1/Rab11fip2/Synj1/Adora2b/Lyn/Stx1b/Notch1/Fbxl20/Prrt2/Sv2c/Ppfia2/Syngr1/Cplx2/Gab2/Lat2/P2rx7/Rapgef4/Syk/Stxbp2/Kcnb1/Stx19/Fcer1g/Napb/Spi1/Itgb2/Npy1r/Plek/Coro1a/Cacna1h/Nckap1l/Rac2/Nppc/Cd84/Syn2/Ccr2/Prkcb/Ptafr/Cd300a/Gata2/Kit/Fcgr4/P2ry1/Syt13
GO:1903039	positive regulation of leukocyte cell-cell adhesion	247	-0.524377	-1.65419	3.76356e-05	3.76356e-05	0.000873513	2574	tags=30%, list=14%, signal=26%	Malt1/Stat5b/Prkcq/Ccr7/Aif1/H2-Q7/Rasgrp1/Zmiz1/Rasal3/H2-D1/Vnn1/Gli3/Tyk2/Ephb4/B2m/Il7r/Cd86/Smarca2/Itpkb/Xcl1/Stat5a/Vsir/H2-DMb1/Irf1/H2-DMa/Cd55/Hlx/Cav1/Nlrp3/Sox13/Icosl/Socs1/Syk/Irgm1/Efnb3/Tnfsf9/Cd46/H2-Ab1/H2-Q6/H2-T23/Pik3r6/Sele/Itgb2/Il23a/Il15/Dock8/Cd274/Coro1a/Il1b/Nckap1l/Selp/Cd24a/H2-Q4/Il2rg/Card11/Nfkbid/Cd74/Lilrb4a/H2-Eb1/Ptprc/H2-Aa/Itga4/Itgal/Ccr2/Kitl/Sash3/Ptafr/H…
GO:0046032	ADP catabolic process	96	0.51775	1.8456	3.76979e-05	3.76979e-05	0.000873513	766	tags=23%, list=4%, signal=22%	Aldoc/Eno1/Pgk1/Eno1b/Pfkl/Slc2a6/Tpi1/Pgam1/Pkm/Gapdh/Gale/Aldoa/Gck/Galk1/Htr2a/Ier3/Eif6/Gpi1/Adpgk/Enpp1/Hif1a/Ddit4
GO:0032612	interleukin-1 production	111	-0.604304	-1.77764	3.77445e-05	3.77445e-05	0.000873513	2028	tags=31%, list=11%, signal=27%	Arrb2/Tlr2/Ifi204/Acp5/Smad3/Aim2/Pml/Tlr4/Wnt5a/Casp4/Slamf9/Mndal/P2rx7/Nlrp3/Ccl3/Trem2/Serpinb1b/Tyrobp/Cx3cr1/Il1b/Ifi203/Lpl/Lilrb4a/Il16/Ccr5/Nod2/Ifi207/Ifi208/Ifi206/Gbp5/Cd36/Ifi213/Ifi209/Ceacam1
GO:0019221	cytokine-mediated signaling pathway	387	-0.483404	-1.55921	3.87761e-05	3.87761e-05	0.000893115	2173	tags=30%, list=12%, signal=27%	Prkn/Isg15/Stap1/Tyk2/Ticam2/Rps6ka5/Axl/Card14/Traf5/Prlr/Oasl1/Stat4/Parp9/Lyn/Il7r/Ikbke/Ifitm6/Il21r/Notch1/Cxcl12/Padi2/Xcl1/Irs1/Foxc1/Cntfr/Usp27x/Trim6/Il33/Aim2/Rffl/Stat5a/Slc27a1/Ghr/Il34/Irf1/Plcb1/Nsmaf/Sh2b3/Rbm47/Igtp/Il10rb/Wnt5a/Casp4/Ccrl2/Ccl4/Irf5/Traf3ip2/Cav1/Ifih1/Eda/Ccl3/Ptpn6/Traf1/Trem2/Irf7/Cxcl9/Ccdc3/Socs1/Syk/Oas1a/Csf1r/Csf2rb2/Irgm2/Stat2/Appl2/Cxcl10/Irgm1/Oas1g/…
GO:0048771	tissue remodeling	181	-0.548706	-1.68901	3.93339e-05	3.93339e-05	0.000901667	1943	tags=34%, list=11%, signal=31%	Ddr2/Gpr137b/Axl/Npr2/Pdk4/Tgm2/Ptn/Gja1/Acp5/Ubash3b/Ppargc1b/Foxc1/Lgr4/Mmp2/Tpp1/Stat5a/Tgfbr3/Pml/Gpnmb/Epha2/Ypel4/Hoxa3/Notch2/Tmem64/Cav1/P2rx7/Syk/Csf1r/Ctss/Ednra/Mitf/Cspg4/Epas1/Tnfrsf11a/Cd38/Igfbp5/Il23a/Ahr/Acvr2b/Cd24a/Fgf10/Nos2/Inpp5d/Rac2/Angpt2/Mmp9/Inpp4b/Nppc/S1pr1/Itga4/Nos3/Lepr/Rassf2/Ccr2/Chd7/Clec10a/Flt4/Fcgr4/Dlk1/Ceacam1/Dll4/Tie1
GO:0006413	translational initiation	108	0.524514	1.87791	4.00048e-05	4.00048e-05	0.000909752	2989	tags=40%, list=17%, signal=33%	Eif4ebp1/Eif6/Eif3b/Dhx29/Eif2s1/Dnajc3/Eif1ax/Bc1/Eif4e2/Eif4a1/Eif2b3/Eif2b1/Bzw2/Eif1b/Abce1/Rps6kb1/Eif1ad/Eif2b5/Ncbp1/Tmed2/Eif1/Larp1/Npm1/Eif3i/Eif3d/Eif4g1/Eif2b2/Tpr/Eif3c/Eif5/Eif3g/Eif4e/Eif4g2/Denr/Bzw1/Eif2s2/Eif5b/Abcf1/Ppp1r15b/Ppp1r15a/Ncbp2/Habp4/Eif3a
GO:0046634	regulation of alpha-beta T cell activation	116	-0.610179	-1.80369	4.0083e-05	4.0083e-05	0.000909752	2574	tags=35%, list=14%, signal=30%	Malt1/Prkcq/Ccr7/H2-Q7/Rasal3/Sh3rf1/H2-D1/Gli3/Tyk2/Hfe/Twsg1/Itpkb/Xcl1/Vsir/Irf1/Cd55/Hlx/Nlrp3/Socs1/Syk/Irgm1/H2-Ab1/H2-Q6/H2-T23/Il23a/Cd274/Nckap1l/Cd24a/Prdm1/H2-Q4/Il2rg/Card11/Nfkbid/Lilrb4a/Ptprc/Ccr2/Sash3/Cd300a/Cd83/Cd28/Gimap5
GO:0000165	MAPK cascade	684	-0.438263	-1.42457	4.02508e-05	4.02508e-05	0.000909752	2414	tags=23%, list=14%, signal=21%	Fktn/Nbr1/Rasgrp1/Inpp5k/C1qtnf2/Spred1/Thpo/Sh3rf1/Ccl9/Cracr2a/Vangl2/Gsdme/C1qtnf1/Ddr2/Ece1/Insr/Trim5/Map2k6/Shc1/Arrb2/Egf/Mapk12/Tlr2/Npr2/Fbln1/Lyn/Efna1/Met/Gsn/Dixdc1/Atf7/Notch1/Dab2/Itga1/Taok2/Cxcl12/Adra1a/Bmp4/Map3k20/Psap/Itpkb/Xcl1/Smad3/Spred2/Sash1/Pik3r2/Plcg2/Zfp36l1/Dynlt1b/Map3k5/Myoc/Dok4/Wnk4/Il34/Trim12c/P2ry6/Plcb1/Gpnmb/Dmd/Zfp36/Epha2/Trim30d/Sh2b3/Akap12/Tlr4/Flcn/Sy…
GO:0009135	purine nucleoside diphosphate metabolic process	103	0.518886	1.86388	4.20382e-05	4.20382e-05	0.000941352	1079	tags=26%, list=6%, signal=25%	Aldoc/Eno1/Pgk1/Eno1b/Pfkl/Slc2a6/Tpi1/Pgam1/Pkm/Gapdh/Gale/Aldoa/Gck/Galk1/Htr2a/Ier3/Guk1/Eif6/Gpi1/Adpgk/Ak1/Enpp1/Hif1a/Ddit4/Ak2/Nudt18/Pfkp
GO:0009179	purine ribonucleoside diphosphate metabolic process	103	0.518886	1.86388	4.20382e-05	4.20382e-05	0.000941352	1079	tags=26%, list=6%, signal=25%	Aldoc/Eno1/Pgk1/Eno1b/Pfkl/Slc2a6/Tpi1/Pgam1/Pkm/Gapdh/Gale/Aldoa/Gck/Galk1/Htr2a/Ier3/Guk1/Eif6/Gpi1/Adpgk/Ak1/Enpp1/Hif1a/Ddit4/Ak2/Nudt18/Pfkp
GO:0036503	ERAD pathway	97	0.518777	1.83724	4.34143e-05	4.34143e-05	0.000967687	4253	tags=51%, list=24%, signal=39%	Foxred2/Sdf2l1/Hspa5/Hsp90b1/Fbxo17/Sec61b/Calr/Selenos/Rcn3/H13/Ube2j2/Rnf121/Dnajb2/Derl1/Faf1/Vcp/Dnajb9/Stub1/Derl2/Ubxn4/Man1a2/Ubqln1/Usp13/Ubxn8/Ube2j1/Canx/Ccdc47/Usp14/Uggt1/Edem1/Bcap31/Ube2g2/Bag6/Sgta/Erlec1/Sel1l/Tmem259/Herpud1/Calr3/Ubqln2/Faf2/Ankzf1/Syvn1/Ufd1/Jkamp/Edem2/Psmc6/Edem3/Wfs1
GO:0007186	G protein-coupled receptor signaling pathway	563	-0.449049	-1.4555	4.40255e-05	4.40255e-05	0.000976809	2486	tags=23%, list=14%, signal=20%	Ccr7/Pde4b/Lpar6/Gpr161/Chga/Adgrl4/Cish/Grm8/Inpp5k/Dgka/Thpo/Cmklr1/Ramp1/Ccl9/Dgkd/Prex1/Orai1/Gnas/Ece1/Insr/Dgkq/Arrb2/Adora2b/Tgm2/Lyn/Met/Kctd12/Cxcl12/Adra1a/Padi2/Psap/Xcl1/Foxc1/Lgr4/P2ry12/Agtr1a/Atp2b4/Igf2r/Dynlt1b/Adcy4/Dagla/Cysltr1/Mgll/Gprc5b/Itpr3/Gpr157/P2ry6/Plcb1/Sh2b3/Tmod2/Akap12/C3ar1/Ccrl2/Ccl4/Rxfp3/Cav1/Arrdc3/Ccl3/Rapgef4/Trem2/Cxcl9/Dgkb/Arrb1/Syk/P2ry14/Ramp2/Cxcl10/…
GO:0009132	nucleoside diphosphate metabolic process	119	0.488179	1.8028	4.5297e-05	4.5297e-05	0.00100043	1399	tags=28%, list=8%, signal=26%	Aldoc/Eno1/Pgk1/Eno1b/Pfkl/Slc2a6/Tpi1/Pgam1/Pkm/Ak4/Gapdh/Gale/Aldoa/Gck/Galk1/Htr2a/Ier3/Guk1/Eif6/Gpi1/Entpd6/Adpgk/Ak1/Enpp1/Hif1a/Ddit4/Ak2/Cad/Nudt18/Pfkp/Dtymk/Umps/Arl2
GO:0010498	proteasomal protein catabolic process	480	0.32508	1.39008	4.58727e-05	4.58727e-05	0.00100854	4107	tags=33%, list=23%, signal=26%	Foxred2/Sdf2l1/Hspa5/Bag2/Ecrg4/Plk3/Siah2/Hsp90b1/Rnf126/Plk2/Fbxo17/Fbxl22/Cdc34/Sec61b/Dda1/Kctd5/Psmc4/Calr/Klhl40/Rad23b/Ecscr/Selenos/Rcn3/Psmd7/Oaz1/Prkcg/Park7/H13/Psmb5/Psmc2/Psmc5/Ube2s/Psma7/Psmb3/Psmb6/Desi1/Psmb2/Ube2j2/Psmd6/Psmd14/Psma3/Ccnf/Rnf121/Dnajb2/Derl1/Rnf187/Nr1d1/Faf1/Ddb1/Psmb4/Spsb1/Cdc16/Hsp90ab1/Psmd1/Ube2n/Psmd8/Alad/Vcp/Anapc4/Nkd2/Dnajb9/Spsb3/Stub1/Derl2/Ubxn4/Fb…
GO:0010257	NADH dehydrogenase complex assembly	53	0.62132	2.01759	4.66567e-05	4.66567e-05	0.00101654	4886	tags=75%, list=27%, signal=55%	Ndufab1/Ndufaf5/Ndufb8/Ndufa8/Ndufb10/Aifm1/Ndufb6/Ndufs7/Ndufaf4/Ndufs3/Ndufs8/Ndufa11/Ndufs5/Ndufs4/Ndufb9/Ndufb7/Tmem126a/Ndufaf2/Ndufb11/Ndufs6/Ndufb2/Foxred1/Ndufa13/Ndufaf6/Ndufa9/Dmac1/Ndufs2/Ndufa12/Lyrm2/Ndufaf7/Ndufa5/Ndufa10/Ndufb4/Ndufc2/Ndufc1/Ndufaf8/Ndufb5/Ndufs1/Nubpl/Ndufaf3
GO:0032981	mitochondrial respiratory chain complex I assembly	53	0.62132	2.01759	4.66567e-05	4.66567e-05	0.00101654	4886	tags=75%, list=27%, signal=55%	Ndufab1/Ndufaf5/Ndufb8/Ndufa8/Ndufb10/Aifm1/Ndufb6/Ndufs7/Ndufaf4/Ndufs3/Ndufs8/Ndufa11/Ndufs5/Ndufs4/Ndufb9/Ndufb7/Tmem126a/Ndufaf2/Ndufb11/Ndufs6/Ndufb2/Foxred1/Ndufa13/Ndufaf6/Ndufa9/Dmac1/Ndufs2/Ndufa12/Lyrm2/Ndufaf7/Ndufa5/Ndufa10/Ndufb4/Ndufc2/Ndufc1/Ndufaf8/Ndufb5/Ndufs1/Nubpl/Ndufaf3
GO:0046641	positive regulation of alpha-beta T cell proliferation	36	-0.768045	-1.94603	4.72823e-05	4.72823e-05	0.00102555	2506	tags=50%, list=14%, signal=43%	Prkcq/H2-Q7/Rasal3/H2-D1/Tyk2/Xcl1/Cd55/Syk/Irgm1/H2-Q6/H2-T23/Il23a/Cd24a/H2-Q4/Card11/Ptprc/Ccr2/Cd28
GO:0006735	NADH regeneration	17	0.82054	2.08745	4.90339e-05	4.90339e-05	0.00104942	485	tags=53%, list=3%, signal=52%	Eno1/Pgk1/Eno1b/Pfkl/Tpi1/Pkm/Gapdh/Aldoa/Gpi1
GO:0061621	canonical glycolysis	17	0.82054	2.08745	4.90339e-05	4.90339e-05	0.00104942	485	tags=53%, list=3%, signal=52%	Eno1/Pgk1/Eno1b/Pfkl/Tpi1/Pkm/Gapdh/Aldoa/Gpi1
GO:0061718	glucose catabolic process to pyruvate	17	0.82054	2.08745	4.90339e-05	4.90339e-05	0.00104942	485	tags=53%, list=3%, signal=52%	Eno1/Pgk1/Eno1b/Pfkl/Tpi1/Pkm/Gapdh/Aldoa/Gpi1
GO:0030855	epithelial cell differentiation	515	-0.458387	-1.484	5.03251e-05	5.03251e-05	0.00106909	1994	tags=19%, list=11%, signal=17%	Sipa1l3/Stc1/Prlr/Npr2/Zeb1/Met/Gja1/Frmd6/Notch1/Dab2/Nr2f2/Bmp4/Psap/Sox11/Ppl/Smad3/Foxc1/Spred2/Triobp/Thrb/Zfp36l1/Stat5a/Ptgs1/Gli2/Plcb1/Dmd/Zfp36/Epha2/Zfas1/Dll1/Bmp5/Sipa1/Map3k1/Tmem100/Notch2/Wnt5a/Nfib/Cav1/Ptch1/Mtss1/Sprr1a/Tmod1/Rarb/Spry2/Spry1/Csf1r/Pthlh/Ednra/Prkch/Epas1/Txnip/Pde2a/Sfrp4/Ccnd1/Klf5/Prox1/Acvr2b/Il1b/Esr1/Apold1/Rapgef3/Xdh/Ptpro/Cd24a/Prdm1/Fgf10/Mmp9/Cxcr4/K…
GO:0050868	negative regulation of T cell activation	125	-0.598014	-1.78342	5.03949e-05	5.03949e-05	0.00106909	2481	tags=30%, list=14%, signal=26%	Pla2g2d/H2-Q7/H2-D1/Gli3/Zc3h8/Hfe/Lag3/Zfp608/Cd86/Twsg1/Bmp4/Vsir/Irf1/Gpnmb/Hlx/Ptpn6/Socs1/Lrrc32/Cd37/H2-Q6/Tnfrsf21/H2-T23/Laptm5/Cd274/Fgl2/Cd24a/H2-Q4/Nfkbid/Dtx1/Cd74/Lilrb4a/Tnfaip8l2/H2-Aa/Cd300a/Ripor2/Nrarp/Ceacam1/Gimap5
GO:0002228	natural killer cell mediated immunity	66	-0.675564	-1.88475	5.08485e-05	5.08485e-05	0.00106958	2542	tags=39%, list=14%, signal=34%	Tap2/Stat5b/Rab27a/H2-Q7/Rasgrp1/H2-D1/Clec2d/Arrb2/Lag3/Klrk1/Tap1/Stat5a/Klrb1a/Ptpn6/H2-Q6/H2-T23/Pik3r6/Coro1a/H2-Q4/Cd2/Cadm1/Fcgr4/Klrd1/Igf2/Ceacam1/Gimap5
GO:0019677	NAD catabolic process	20	0.788243	2.09774	5.08603e-05	5.08603e-05	0.00106958	485	tags=45%, list=3%, signal=44%	Eno1/Pgk1/Eno1b/Pfkl/Tpi1/Pkm/Gapdh/Aldoa/Gpi1
GO:0098655	monoatomic cation transmembrane transport	553	-0.446412	-1.44652	5.14103e-05	5.14103e-05	0.00107467	1973	tags=18%, list=11%, signal=17%	Kcnip3/Nnt/Slc23a2/Lyn/Cacna2d2/Ubash3b/Fxyd3/Adra1a/Bmp4/Mcoln1/Xcl1/Scn2b/P2rx6/P2ry12/Agtr1a/Atp2b4/Akap7/Atp1b1/Plcg2/Wnk4/Kcnh3/Slc36a1/Pml/Ank2/Itpr3/Tpcn1/Plcb1/Dmd/Tcn2/Zfas1/Cacng7/Kcnj2/Fhl1/Steap4/Gjc2/Slc12a6/Cav1/P2rx7/Mcoln2/Ptpn6/Kcnq4/Steap3/Kcnh2/Trem2/Cxcl9/Klhl24/Ctss/Agrn/Cxcl10/Mrln/Ednra/Slc24a5/Rem1/Kcnb1/Kcnt2/Nr3c2/Slc8b1/Plp1/Scara5/Kcna1/Ahr/Coro1a/Atp2a1/Cacna1h/Rapgef…
GO:0002700	regulation of production of molecular mediator of immune response	182	-0.547645	-1.6882	5.15517e-05	5.15517e-05	0.00107467	2093	tags=29%, list=12%, signal=26%	Ticam2/Hfe/Axl/B2m/Tlr2/Acp5/Cd86/Ppl/Xcl1/Pkn1/Tnfsf13/Dennd1b/Plcg2/Trim6/Il33/Mzb1/Vsir/Gprc5b/Tlr4/Wnt5a/Casp4/Tek/Cd55/Irf5/Tlr3/P2rx7/Nlrp3/Tril/Syk/Cd37/H2-Q6/Fcer1g/H2-T23/Laptm5/Il10/Il1b/H2-Q4/Cd74/Lilrb4a/Cd22/Ptprc/Fcgr2b/Nod2/Rsad2/Tlr7/Spon2/Ccr2/Sash3/Cd28/Ighm/Kit/Cd36/Gimap5
GO:0040017	positive regulation of locomotion	580	-0.44851	-1.45568	5.1769e-05	5.1769e-05	0.00107467	1947	tags=23%, list=11%, signal=21%	Tlr2/Adora2b/Fbln1/Lyn/Met/Cxcl14/Ptn/Rin2/Vegfc/Acp5/Notch1/Dab2/Amot/Cxcl12/Bmp4/Amotl1/Itga3/Xcl1/Synpo2/Grn/Irs1/Smad3/Mmp2/P2ry12/Sash1/Plcg2/Cavin1/Myoc/Stat5a/Tgfbr3/Vsir/Il34/Smoc2/P2ry6/Gpnmb/Gab2/Sema3f/Epha2/Snai2/Alox12/Akap12/Tlr4/Pld1/Cd151/C3ar1/Syne2/Wnt5a/Tek/Sema6a/Vtn/Cav1/Ntn1/Shtn1/Sema5a/Rapgef4/Trem2/Sema6b/Fermt3/Spry2/Csf1r/Ssh2/Cxcl10/Camk1d/Ednra/Defb25/Sema6d/Gcnt2/Gpl…
GO:0034341	response to type II interferon	131	-0.596009	-1.78648	5.257e-05	5.257e-05	0.00108664	1982	tags=34%, list=11%, signal=31%	Rab43/Tlr2/Parp9/Gsn/Ifitm6/Xcl1/Dapk1/Irf1/Ciita/Slc22a5/Tlr4/Igtp/Rab20/Trim21/Ccl4/Mrc1/Ccl3/Pde12/Irgm2/Irgm1/Stxbp2/Sp100/Parp14/H2-Ab1/Ccl8/Gbp7/Nlrc5/Gbp2/Nos2/Cd74/Ifitm1/Slc11a1/H2-Eb1/Irf8/Gbp3/H2-Aa/Ccl6/Ccl11/Ccl12/Gbp6/Gbp9/Gbp5/Gbp8/Tgtp1/Gbp4
GO:0019364	pyridine nucleotide catabolic process	98	0.520299	1.85768	5.34032e-05	5.34032e-05	0.00109916	766	tags=22%, list=4%, signal=22%	Aldoc/Eno1/Pgk1/Eno1b/Pfkl/Slc2a6/Tpi1/Pgam1/Pkm/Gapdh/Gale/Aldoa/Gck/Galk1/Htr2a/Ier3/Eif6/Gpi1/Adpgk/Enpp1/Hif1a/Ddit4
GO:0015986	proton motive force-driven ATP synthesis	43	0.655582	2.06772	5.51845e-05	5.51845e-05	0.00112624	4240	tags=77%, list=24%, signal=59%	Ndufab1/Atpsckmt/Ndufb8/Ndufa8/Ndufb10/Ndufb6/Ndufs7/Sdhb/Ndufs3/Ndufs8/Ndufa11/Ndufs5/Ndufs4/Ndufb9/Ndufb7/Ndufv1/Sdhd/Ndufb11/Ndufs6/Ndufb2/Stoml2/Ndufa13/Dnajc30/Ndufa9/Ndufv3/Ndufv2/Ndufs2/Ndufa12/Ndufa5/Ndufa10/Ndufb4/Ndufc2/Ndufc1
GO:0042776	proton motive force-driven mitochondrial ATP synthesis	43	0.655582	2.06772	5.51845e-05	5.51845e-05	0.00112624	4240	tags=77%, list=24%, signal=59%	Ndufab1/Atpsckmt/Ndufb8/Ndufa8/Ndufb10/Ndufb6/Ndufs7/Sdhb/Ndufs3/Ndufs8/Ndufa11/Ndufs5/Ndufs4/Ndufb9/Ndufb7/Ndufv1/Sdhd/Ndufb11/Ndufs6/Ndufb2/Stoml2/Ndufa13/Dnajc30/Ndufa9/Ndufv3/Ndufv2/Ndufs2/Ndufa12/Ndufa5/Ndufa10/Ndufb4/Ndufc2/Ndufc1
GO:0002455	humoral immune response mediated by circulating immunoglobulin	37	-0.755654	-1.91973	5.70478e-05	5.70478e-05	0.00115937	1144	tags=49%, list=6%, signal=46%	Cr2/Bcl3/Serping1/Cd55/Ptpn6/Trem2/C2/C1qa/C1qc/C1qb/C1ra/Cd46/C1s1/Ptprc/Fcgr2b/Nod2/Ighm/Gimap5
GO:0042267	natural killer cell mediated cytotoxicity	65	-0.677437	-1.88352	5.76871e-05	5.76871e-05	0.00116746	2542	tags=40%, list=14%, signal=34%	Tap2/Stat5b/Rab27a/H2-Q7/Rasgrp1/H2-D1/Clec2d/Arrb2/Lag3/Klrk1/Tap1/Stat5a/Klrb1a/Ptpn6/H2-Q6/H2-T23/Pik3r6/Coro1a/H2-Q4/Cd2/Cadm1/Fcgr4/Klrd1/Igf2/Ceacam1/Gimap5
GO:0036294	cellular response to decreased oxygen levels	115	0.48695	1.78735	5.90171e-05	5.90171e-05	0.0011894	838	tags=23%, list=5%, signal=23%	Mgarp/Egln3/Higd1a/Eno1/Fam162a/Pgk1/Bnip3/Eno1b/Ddah1/Ak4/Pdk1/Egln1/Vegfa/Plk3/Eif4ebp1/Hyou1/Ptgis/Nol3/Vasn/Rgcc/Suv39h2/Pdk3/Ajuba/Hif1a/Tbl2/Twist1/P4hb
GO:0007219	Notch signaling pathway	161	-0.559561	-1.71588	6.03738e-05	6.03738e-05	0.00120611	1845	tags=23%, list=10%, signal=21%	Notch1/Ptp4a3/Rian/Gdpd5/Foxc1/Dtx3/Snai2/Dll1/Tmem100/Notch2/Robo2/Enho/Dtx3l/Arrb1/Tbx2/Cd46/Notch3/Nrip2/Dtx4/Fgf10/Dtx1/Nod2/Jag2/Egfl7/Gata2/Bmp7/Kit/Hhex/Tspan15/Timp4/Eya1/Nrarp/Dlk1/Pln/Dll4/Mfng/Kcna5
GO:0010562	positive regulation of phosphorus metabolic process	700	-0.437639	-1.42349	6.05941e-05	6.05941e-05	0.00120611	2057	tags=21%, list=12%, signal=19%	Ephb4/Map2k6/Axl/Dgkq/Arrb2/Tspan9/Pxn/Card14/Egf/Prlr/Pink1/Adora2b/Parp9/Atg14/Lyn/Efna1/Met/Vegfc/Dab2/Cd86/Clip3/Itga1/Ppargc1b/Adra1a/Bmp4/Irs1/Mmd/Mtcp1/Atp2b4/Sash1/Limch1/Zbtb20/Plcg2/Trim6/Map3k5/Pid1/Lrp4/Ghr/Wnk4/Il34/Gprc5b/P2ry6/Gfra1/Gpnmb/Epha2/Cln3/Tlr4/Flcn/Igtp/Rspo1/Map3k1/Notch2/Wnt5a/Tek/Vtn/Cav1/Map3k11/P2rx7/Flt3l/Ror1/Wdfy2/Trem2/Socs1/Arrb1/Syk/Spry2/Csf1r/Irgm2/Rgma/Agrn…
GO:0045937	positive regulation of phosphate metabolic process	700	-0.437639	-1.42349	6.05941e-05	6.05941e-05	0.00120611	2057	tags=21%, list=12%, signal=19%	Ephb4/Map2k6/Axl/Dgkq/Arrb2/Tspan9/Pxn/Card14/Egf/Prlr/Pink1/Adora2b/Parp9/Atg14/Lyn/Efna1/Met/Vegfc/Dab2/Cd86/Clip3/Itga1/Ppargc1b/Adra1a/Bmp4/Irs1/Mmd/Mtcp1/Atp2b4/Sash1/Limch1/Zbtb20/Plcg2/Trim6/Map3k5/Pid1/Lrp4/Ghr/Wnk4/Il34/Gprc5b/P2ry6/Gfra1/Gpnmb/Epha2/Cln3/Tlr4/Flcn/Igtp/Rspo1/Map3k1/Notch2/Wnt5a/Tek/Vtn/Cav1/Map3k11/P2rx7/Flt3l/Ror1/Wdfy2/Trem2/Socs1/Arrb1/Syk/Spry2/Csf1r/Irgm2/Rgma/Agrn…
GO:0002712	regulation of B cell mediated immunity	68	-0.665568	-1.86433	6.15938e-05	6.15938e-05	0.001216	2396	tags=31%, list=13%, signal=27%	H2-Q7/Shld1/H2-D1/Cr2/Xcl1/Tnfsf13/Fcgr3/Cd55/Ptpn6/Trem2/Cd46/H2-Q6/Fcer1g/H2-T23/H2-Q4/Ptprc/Fcgr2b/Nod2/Fcgr1/Cd28/Gimap5
GO:0002889	regulation of immunoglobulin mediated immune response	68	-0.665568	-1.86433	6.15938e-05	6.15938e-05	0.001216	2396	tags=31%, list=13%, signal=27%	H2-Q7/Shld1/H2-D1/Cr2/Xcl1/Tnfsf13/Fcgr3/Cd55/Ptpn6/Trem2/Cd46/H2-Q6/Fcer1g/H2-T23/H2-Q4/Ptprc/Fcgr2b/Nod2/Fcgr1/Cd28/Gimap5
GO:0001936	regulation of endothelial cell proliferation	134	-0.588757	-1.7747	6.36687e-05	6.36687e-05	0.00125185	2026	tags=28%, list=11%, signal=25%	Aldh1a2/Egf/Adora2b/Gja1/Vegfc/Nr2f2/Cxcl12/Bmp4/Agtr1a/Stat5a/Wnt5a/Tek/Cav1/Sema5a/Il10/Prox1/Mmrn2/Xdh/Fgf10/Cav2/Col18a1/Itga4/Ccl11/Egfl7/Gata2/Flt1/Flt4/Ngfr/Cdh13/Ppp1r16b/Nrarp/Igf2/Dlk1/Kdr/Pdgfb/Dll4/Aplnr/Tie1
GO:0033993	response to lipid	626	-0.438732	-1.42508	6.52552e-05	6.52552e-05	0.00127785	2202	tags=22%, list=12%, signal=20%	Cr2/Shpk/Gnas/Scd1/Stap1/Kdm5d/Ncoa3/Ticam2/Brinp3/Trim5/Axl/Aldh1a2/Mest/Synj1/B2m/Tlr2/Pdk4/Foxo3/Casp9/Lyn/Acp5/Dab2/Cd86/Klrk1/Ppargc1b/Padi2/Bmp4/Grn/Irs1/Trerf1/Mmp2/Agtr1a/Sash1/Myod1/Sbno2/Plcg2/Igf2r/Zfp36l1/Ncoa2/Trim6/Pid1/Ghr/Tgfbr3/Trim12c/Gpr155/P2ry6/Plcb1/Zfp36/Tfap4/Trim30d/Snai2/Tlr4/Igtp/Trim12a/Casp4/Tek/Ncf2/Cd55/Scarb1/Cav1/Ptch1/P2rx7/Nlrp3/Calcoco1/Mrc1/Trem2/Cxcl9/Syk/Ly9…
GO:0048193	Golgi vesicle transport	268	0.379354	1.55283	6.86572e-05	6.86572e-05	0.00133905	4103	tags=41%, list=23%, signal=32%	Vamp5/Insig1/Hyou1/Yif1b/Trappc6a/Prkd1/Copz2/Nbas/Yif1a/Kdelr3/Cope/Erp29/P4hb/Tmed9/Copb2/Trappc5/Sar1a/Rangrf/Vapa/Tmem115/Golt1b/Lman1/Vti1b/Trappc4/Rer1/Tmed2/Tex261/Tmed3/Sec13/Lmf1/Vcp/Tmed1/Nkd2/Copb1/Copg1/Trip11/Exoc5/Rint1/Preb/Uso1/Ier3ip1/Blzf1/Arl1/Pitpnb/Ykt6/Trappc3/Arl3/Lman2/Exoc8/Gbf1/Yipf6/Sar1b/Sec23a/Spire1/Tmed10/Arf4/Stx18/Sys1/Kdelr2/Arf5/Vps29/Tfg/Snx3/Bicd2/Gosr2/Bnip1/…
GO:0009199	ribonucleoside triphosphate metabolic process	212	0.410892	1.65205	6.96355e-05	6.96355e-05	0.00135267	3755	tags=42%, list=21%, signal=34%	Aldoc/Eno1/Pgk1/Eno1b/Pfkl/Slc2a6/Tpi1/Pgam1/Pkm/Ak4/Gapdh/Gale/Aldoa/Gck/Galk1/Nme1/Htr2a/Uck2/Ier3/Ran/Nme2/Eif6/Gpi1/Adpgk/Ak1/Enpp1/Hif1a/Ddit4/Slc25a25/Ndufab1/Cad/Pfkp/Tspo/Atpsckmt/Arl2/Impdh1/Nudt2/Foxk2/Vcp/Ndufb8/Ndufa8/Ndufb10/Ndufb6/Impdh2/Map2k1/Ola1/Hk1/Ndufs7/Sdhb/Nudt5/Hspa8/Ndufs3/Ndufs8/Itpa/Ndufa11/Ndufs5/Ndufs4/Parp1/Nme6/Ndufb9/Ndufb7/Ndufv1/Rhoq/Rab23/Mtch2/Sdhd/Efl1/Ndufb11…
GO:0141086	negative regulation of inflammasome-mediated signaling pathway	25	-0.808402	-1.90839	7.11531e-05	7.11531e-05	0.00137662	1259	tags=52%, list=7%, signal=48%	Igtp/Fbxl2/Mndal/Trem2/Irgm2/Irgm1/Trim30a/Ifi203/Ifi207/Ifi208/Ifi206/Ifi213/Ifi209
GO:0002573	myeloid leukocyte differentiation	241	-0.509382	-1.605	7.20121e-05	7.20121e-05	0.00138486	1947	tags=29%, list=11%, signal=26%	Clec2d/Lbr/Ccl9/Gnas/Gpr137b/Sp3/Tlr2/Lyn/Ifi204/Ubash3b/Ppargc1b/Bmp4/Gab3/Sbno2/Zfp36l1/Il33/Stat5a/Il34/Plcb1/Gab2/Epha2/Tlr4/Notch2/Gpc3/Tmem64/Tspan2/Mndal/Ccl3/Trem2/Socs1/C1qc/Csf1r/Gpr183/Zbtb46/Tnfsf9/Mitf/Tyrobp/Prxl2a/Fcer1g/Tnfrsf11a/Pirb/Spi1/Il23a/Il15/Batf/Ikzf1/Ifi203/Batf3/Inpp5d/Cd74/Lilrb4a/Inpp4b/Hcls1/Ifi207/Rassf2/Kitl/Ifi208/Ifi206/Gata2/Lef1/Nrros/Kit/Hhex/Tesc/Ifi213/Cbfa…
GO:0032651	regulation of interleukin-1 beta production	91	-0.620829	-1.77407	7.21513e-05	7.21513e-05	0.00138486	2028	tags=33%, list=11%, signal=29%	Arrb2/Tlr2/Ifi204/Acp5/Smad3/Aim2/Pml/Tlr4/Wnt5a/Casp4/Mndal/P2rx7/Nlrp3/Ccl3/Trem2/Serpinb1b/Tyrobp/Cx3cr1/Ifi203/Lpl/Lilrb4a/Ccr5/Nod2/Ifi207/Ifi208/Ifi206/Gbp5/Cd36/Ifi213/Ifi209
GO:0002702	positive regulation of production of molecular mediator of immune response	129	-0.573618	-1.71559	7.3502e-05	7.3502e-05	0.00140521	1975	tags=34%, list=11%, signal=31%	H2-Q7/Shld1/H2-D1/Ticam2/B2m/Tlr2/Cd86/Xcl1/Tnfsf13/Dennd1b/Plcg2/Trim6/Il33/Mzb1/Gprc5b/Tlr4/Wnt5a/Casp4/Tek/Cd55/Irf5/Tlr3/P2rx7/Nlrp3/Syk/Cd37/H2-Q6/Fcer1g/H2-T23/Laptm5/Il10/Il1b/H2-Q4/Cd74/Ptprc/Nod2/Rsad2/Tlr7/Spon2/Sash3/Cd28/Kit/Cd36/Gimap5
GO:0032611	interleukin-1 beta production	95	-0.625421	-1.79964	7.58834e-05	7.58834e-05	0.00144502	2028	tags=34%, list=11%, signal=30%	Arrb2/Tlr2/Ifi204/Acp5/Smad3/Aim2/Pml/Tlr4/Wnt5a/Casp4/Slamf9/Mndal/P2rx7/Nlrp3/Ccl3/Trem2/Serpinb1b/Tyrobp/Cx3cr1/Il1b/Ifi203/Lpl/Lilrb4a/Ccr5/Nod2/Ifi207/Ifi208/Ifi206/Gbp5/Cd36/Ifi213/Ifi209
GO:0051336	regulation of hydrolase activity	722	-0.428851	-1.39525	7.75826e-05	7.75826e-05	0.00147159	2866	tags=27%, list=16%, signal=23%	Rgs2/Stat1/Vav1/Fgd1/Rictor/Arhgap12/Rabgap1/Tbc1d5/Ralgps1/Rhog/Arhgef5/Txk/Hspa1b/Epha3/Tmem106b/Casp1/Vav3/Npnt/Bicd1/Mef2c/Malt1/Aph1c/Dpep1/Casp2/Spint2/Ccr7/Xiap/Apaf1/Rap1gap/Rasgrp1/Nr1h3/Dock11/Ttc8/Rasal3/Sh3rf1/Ppp1r2/Ralgapa2/Arhgap24/Ccl9/Gpihbp1/Prex1/Agap2/Arap2/Ralgapa1/Wrn/Plxnb1/Gnas/Gpr137b/Rab11fip2/Reck/Rasgef1b/Gmip/Serping1/Oasl1/Sh3bp4/Pde3a/Rps6ka1/Casp9/Lyn/Efna1/Met/Gsn…
GO:0042063	gliogenesis	345	-0.483491	-1.54941	7.87404e-05	7.87404e-05	0.00148771	2168	tags=25%, list=12%, signal=22%	Gli3/Wasf3/Adam22/Stap1/Hexb/Tppp/Synj1/Tlr2/Lyn/Ptn/Vegfc/Notch1/Cntnap1/Cnp/Bmp4/Sox11/Grn/P2ry12/Il33/Myoc/Cysltr1/Il34/Gpr157/Dmd/Tlr4/Dll1/Hdac11/Notch2/Syne2/Prdm8/Gjc2/Nfib/Vtn/Ntn1/Lgi4/Tspan2/Dcx/Tcf7l2/Ror1/Ccl3/Sox13/Trem2/C1qa/Zcchc24/Csf1r/Gpm6b/Gpr183/Nfia/Etv5/Cspg4/Hmga2/Clu/Prkch/Ntrk2/Cd9/Tnfrsf21/Plp1/Casz1/Cx3cr1/Plpp3/Il1b/Fgf10/Dtx1/C5ar1/Shank3/Cxcr4/Atp1b2/Klf15/Ntf3/Ncmap…
GO:0032731	positive regulation of interleukin-1 beta production	60	-0.672995	-1.84041	8.00279e-05	8.00279e-05	0.00150616	1947	tags=38%, list=11%, signal=34%	Tlr2/Ifi204/Smad3/Aim2/Tlr4/Wnt5a/Casp4/Mndal/P2rx7/Nlrp3/Ccl3/Tyrobp/Ifi203/Lpl/Ccr5/Nod2/Ifi207/Ifi208/Ifi206/Gbp5/Cd36/Ifi213/Ifi209
GO:0072526	pyridine-containing compound catabolic process	102	0.508272	1.82458	8.15979e-05	8.15979e-05	0.00152234	766	tags=23%, list=4%, signal=22%	Aldoc/Eno1/Pgk1/Eno1b/Pfkl/Slc2a6/Tpi1/Pgam1/Pkm/Gapdh/Gale/Pdxp/Aldoa/Gck/Galk1/Htr2a/Ier3/Eif6/Gpi1/Adpgk/Enpp1/Hif1a/Ddit4
GO:0140971	regulation of AIM2 inflammasome complex assembly	13	-0.903523	-1.87452	8.18757e-05	8.18757e-05	0.00152234	1070	tags=69%, list=6%, signal=65%	Mndal/Ifi203/Gbp2/Ifi207/Ifi208/Ifi206/Gbp5/Ifi213/Ifi209
GO:0002819	regulation of adaptive immune response	195	-0.543132	-1.6842	8.20672e-05	8.20672e-05	0.00152234	2692	tags=31%, list=15%, signal=26%	Tap2/Mef2c/Mr1/Malt1/Prkcq/Ccr7/H2-Q7/Shld1/H2-D1/Cr2/Tyk2/Hfe/B2m/Il7r/Xcl1/Pkn1/Tnfsf13/Dennd1b/Il33/Vsir/Fcgr3/Irf1/H2-DMa/Cd55/Hlx/P2rx7/Nlrp3/Ptpn6/Trem2/Irf7/Cd46/H2-Ab1/H2-Q6/Fcer1g/H2-T23/Samsn1/Clec4n/Il23a/Cd274/Ahr/H2-T24/Il1b/Nckap1l/Cd24a/H2-Q4/Mill2/Nfkbid/Cd74/Lilrb4a/Slc11a1/Ptprc/Fcgr2b/Nod2/Rsad2/Ccr2/Sash3/Fcgr1/Cd28/Klrd1/Gimap5
GO:0032732	positive regulation of interleukin-1 production	68	-0.661194	-1.85208	8.22927e-05	8.22927e-05	0.00152234	1947	tags=35%, list=11%, signal=32%	Tlr2/Ifi204/Smad3/Aim2/Tlr4/Wnt5a/Casp4/Mndal/P2rx7/Nlrp3/Ccl3/Tyrobp/Ifi203/Lpl/Il16/Ccr5/Nod2/Ifi207/Ifi208/Ifi206/Gbp5/Cd36/Ifi213/Ifi209
GO:0032814	regulation of natural killer cell activation	48	-0.718902	-1.91714	8.24613e-05	8.24613e-05	0.00152234	2542	tags=46%, list=14%, signal=39%	Stat5b/H2-Q7/Rasgrp1/Fgr/H2-D1/Tyk2/Ticam2/Axl/Stat5a/Irf1/Flt3l/Tyrobp/H2-Q6/H2-T23/Il23a/Il15/Prdm1/H2-Q4/Lilrb4a/Pglyrp1/Slamf7/Klrd1
GO:0002495	antigen processing and presentation of peptide antigen via MHC class II	22	-0.822144	-1.87892	8.51628e-05	8.51628e-05	0.00156094	1975	tags=64%, list=11%, signal=57%	B2m/Unc93b1/H2-DMb1/H2-DMa/Trem2/Ctss/H2-Ab1/Fcer1g/Ifi30/Cd74/H2-Eb1/Fcgr2b/H2-Aa/H2-DMb2
GO:0009117	nucleotide metabolic process	476	0.321425	1.36666	8.5198e-05	8.5198e-05	0.00156094	3546	tags=36%, list=20%, signal=29%	Aldoc/Eno1/Pgk1/Eno1b/Pfkl/Slc2a6/Tpi1/Pgam1/Ldha/Pkm/Ak4/Gapdh/Gale/Hmgcs1/Mvd/Aldoa/Pdk1/Gck/Dgat2/Galk1/Nme1/Slc27a3/Htr2a/Cda/Uck2/Prdx5/Ier3/Mvk/Guk1/Aldh1l2/Ran/Nme2/Eif6/Hmgcr/Nt5c/Gpi1/Acot7/Dctd/Nudt19/Mthfd1/Ampd1/Dctpp1/Adpgk/Ak1/Pcx/Me1/Guca1a/Pdk3/Enpp1/Hif1a/Ada/Ddit4/Txnrd1/Pmvk/Mdh2/Ak2/Dut/Acot4/Slc25a25/Dera/Ndufab1/Park7/Acot1/Cad/Nudt18/Gart/Pfkp/Fasn/Tkt/Dtymk/Tyms/Umps/Gmpr2…
GO:0001910	regulation of leukocyte mediated cytotoxicity	79	-0.642238	-1.81393	8.59327e-05	8.59327e-05	0.00156846	2692	tags=44%, list=15%, signal=38%	Tap2/Mr1/Stat5b/H2-Q7/Rasgrp1/H2-D1/Clec2d/Stap1/Hfe/Arrb2/B2m/Lag3/Il7r/Klrk1/Tap1/Stat5a/Klrb1a/P2rx7/Tyrobp/H2-Q6/H2-T23/Pik3r6/Spi1/Il23a/Cx3cr1/H2-T24/Nckap1l/H2-Q4/Mill2/Ptprc/Cadm1/Klrd1/Igf2/Ceacam1/Gimap5
GO:0050870	positive regulation of T cell activation	225	-0.520423	-1.63256	8.65352e-05	8.65352e-05	0.00157352	2574	tags=30%, list=14%, signal=26%	Malt1/Stat5b/Prkcq/Ccr7/Aif1/H2-Q7/Rasgrp1/Zmiz1/Rasal3/H2-D1/Vnn1/Gli3/Tyk2/Ephb4/B2m/Il7r/Cd86/Smarca2/Itpkb/Xcl1/Stat5a/Vsir/H2-DMb1/Irf1/H2-DMa/Cd55/Hlx/Cav1/Nlrp3/Sox13/Icosl/Socs1/Syk/Irgm1/Efnb3/Tnfsf9/Cd46/H2-Ab1/H2-Q6/H2-T23/Pik3r6/Il23a/Il15/Dock8/Cd274/Coro1a/Il1b/Nckap1l/Cd24a/H2-Q4/Il2rg/Card11/Nfkbid/Cd74/Lilrb4a/H2-Eb1/Ptprc/H2-Aa/Itgal/Ccr2/Kitl/Sash3/H2-DMb2/Cd83/Cd28/Lef1/Igf2/G…
GO:1903706	regulation of hemopoiesis	389	-0.473857	-1.52908	8.81462e-05	8.81462e-05	0.00159257	2875	tags=31%, list=16%, signal=27%	Ripk1/Itgb3/Slamf8/Stat1/Rara/H2-Oa/Zc3h12a/Smarcd2/Asxl2/Mef2c/Mmp14/Mysm1/Fos/Malt1/Mafb/Stat5b/Cdk6/Ccr7/Rasgrp1/Slc46a2/Zmiz1/Thpo/Sh3rf1/Clec2d/Ccl9/Vnn1/Fbxo7/Gli3/Isg15/Gnas/Hoxa9/Gpr137b/Zc3h8/Axl/B2m/Meis1/Lag3/Zfp608/Foxo3/Zeb1/Lyn/Il7r/Ptn/Ubash3b/Smarca2/Ppargc1b/Bmp4/Itpkb/Atp11c/Zfp36l1/Stat5a/Vsir/Il34/Nfam1/Irf1/Zfp36/Ypel4/Snai2/Sh2b3/Dll1/Mturn/Notch2/Tmem64/H2-DMa/Hlx/Nlrp3/Flt…
GO:0042130	negative regulation of T cell proliferation	73	-0.655817	-1.8377	8.8241e-05	8.8241e-05	0.00159257	2666	tags=32%, list=15%, signal=27%	Pde5a/Pla2g2d/H2-Q7/H2-D1/Cd86/Twsg1/Bmp4/Vsir/Gpnmb/Ptpn6/Lrrc32/Cd37/H2-Q6/Tnfrsf21/H2-T23/Laptm5/Cd274/Cd24a/H2-Q4/Lilrb4a/H2-Aa/Ripor2/Ceacam1
GO:0002285	lymphocyte activation involved in immune response	183	-0.5444	-1.67851	8.882e-05	8.882e-05	0.00159706	1705	tags=23%, list=10%, signal=21%	Dock10/Tnfsf13/Plcg2/H2-DMb1/Itm2a/Irf1/Tlr4/Dll1/Notch2/Clec4d/Hlx/Nlrp3/Slfn2/Icosl/Gpr183/Cd46/Cd180/Lcp1/Fcer1g/Spi1/Il10/Il23a/Clec4e/Batf/Coro1a/Nckap1l/Fgl2/Nfkbid/Cd74/Lilrb4a/Pglyrp1/Slc11a1/Ptprc/Irf8/Itgal/Ly9/Ccr2/H2-DMb2/Cd28/Lef1/Fcgr4/Mfng
GO:0009141	nucleoside triphosphate metabolic process	228	0.40208	1.63367	9.27875e-05	9.27875e-05	0.00166222	3068	tags=35%, list=17%, signal=29%	Aldoc/Eno1/Pgk1/Eno1b/Pfkl/Slc2a6/Tpi1/Pgam1/Pkm/Ak4/Gapdh/Gale/Aldoa/Gck/Galk1/Nme1/Htr2a/Uck2/Ier3/Guk1/Ran/Nme2/Eif6/Gpi1/Dctpp1/Adpgk/Ak1/Enpp1/Hif1a/Ada/Ddit4/Ak2/Dut/Slc25a25/Ndufab1/Cad/Pfkp/Dtymk/Tspo/Atpsckmt/Arl2/Impdh1/Nudt2/Foxk2/Vcp/Ndufb8/Ndufa8/Ndufb10/Ndufb6/Impdh2/Map2k1/Ola1/Hk1/Ndufs7/Sdhb/Nudt5/Hspa8/Ndufs3/Ndufs8/Itpa/Ndufa11/Ndufs5/Ndufs4/Parp1/Nme6/Ndufb9/Ndufb7/Ndufv1/Rhoq…
GO:0001935	endothelial cell proliferation	154	-0.562745	-1.71428	9.36746e-05	9.36746e-05	0.00167192	2026	tags=28%, list=11%, signal=25%	Aldh1a2/Egf/Adora2b/Gja1/Vegfc/Nr2f2/Cxcl12/Bmp4/Agtr1a/Stat5a/Epha2/Vstm4/Wnt5a/Tek/Scarb1/Cav1/Sema5a/Cd34/Enpep/Il10/Prox1/Mmrn2/Xdh/Fgf10/Cav2/Col18a1/Itga4/Ccl11/Egfl7/Gata2/Flt1/Flt4/Ngfr/Cdh13/Ppp1r16b/Nrarp/Igf2/Dlk1/Kdr/Pdgfb/Dll4/Aplnr/Tie1
GO:0043299	leukocyte degranulation	63	-0.669579	-1.84535	9.44658e-05	9.44658e-05	0.00167984	2570	tags=41%, list=14%, signal=35%	Myo1f/Rab27a/Chga/Rasgrp1/Fgr/Adora2b/Lyn/Cplx2/Gab2/Lat2/Syk/Stxbp2/Fcer1g/Spi1/Itgb2/Coro1a/Nckap1l/Rac2/Nppc/Cd84/Ccr2/Ptafr/Cd300a/Gata2/Kit/Fcgr4
GO:0019079	viral genome replication	115	-0.594551	-1.75875	9.63136e-05	9.63136e-05	0.00170642	2433	tags=33%, list=14%, signal=29%	Adarb1/Inpp5k/Zfp809/Shfl/Prkn/Isg15/Oasl1/Ifi204/Ifitm6/Notch1/Trim6/Apobec3/Zc3hav1/Znfx1/Zfyve1/Fbxl2/Ifih1/Mndal/Pde12/Oas1a/Oas1g/Hmga2/Ccl8/Oas1c/Rnasel/Oasl2/Prox1/Ifi203/Ifitm1/Ifi207/Oas2/Rsad2/Ifi208/Ifi206/Oas3/Ifi213/Nr5a2/Ifi209
GO:0071453	cellular response to oxygen levels	130	0.457838	1.69843	0.000101675	0.000101675	0.00179483	838	tags=21%, list=5%, signal=20%	Mgarp/Egln3/Higd1a/Eno1/Fam162a/Pgk1/Bnip3/Eno1b/Ddah1/Ak4/Pdk1/Egln1/Vegfa/Plk3/Eif4ebp1/Hyou1/Ptgis/Nol3/Vasn/Rgcc/Suv39h2/Pdk3/Ajuba/Hif1a/Tbl2/Twist1/P4hb
GO:0030522	intracellular receptor signaling pathway	308	-0.491556	-1.5662	0.000102707	0.000102707	0.00180647	2715	tags=26%, list=15%, signal=23%	Asxl2/Nop53/Ncoa1/Wbp2/Irf2/Nr3c1/Peli3/Zfp536/Gpatch3/Slc46a2/Zmiz1/Kmt2d/Lamp2/Kdm5d/Colec12/Ncoa3/Aldh1a2/Oasl1/Ifi204/Slc15a2/Rnf125/Dab2/Cd86/Ppargc1b/Padi2/Trerf1/Thrb/Unc93b1/Plcg2/Ncoa2/Dhx58/Trim25/Zc3hav1/Pml/Irf1/Snai2/Slc15a3/Tlr4/Igtp/Casp4/Cav1/Fbxl2/Ifih1/Tlr3/Mndal/Nlrp3/Calcoco1/Trem2/Irf7/Rarb/Oas1a/Irgm2/Irgm1/Oas1g/Hmga2/Trim30a/Ntrk2/Tifa/Oas1c/Nr3c2/Pik3ap1/Ifi203/Esr1/Gbp2/…
GO:0034767	positive regulation of monoatomic ion transmembrane transport	138	-0.572958	-1.72947	0.000104936	0.000104936	0.00183899	1650	tags=25%, list=9%, signal=23%	Agtr1a/Akap7/Atp1b1/Plcg2/Wnk4/Ank2/Plcb1/Dmd/Kcnj2/Gjc2/Cav1/P2rx7/Kcnh2/Trem2/Cxcl9/Ctss/Cxcl10/Ednra/Plp1/Rapgef3/Shank3/Atp1b2/Chp2/Adcyap1r1/Abcb1a/Clec4b1/Reln/Trpc3/Edn3/Tesc/Kcnc2/Aplnr/Lrrc55/Gimap5
GO:0006753	nucleoside phosphate metabolic process	481	0.317747	1.36049	0.000106156	0.000106156	0.00185365	3546	tags=36%, list=20%, signal=29%	Aldoc/Eno1/Pgk1/Eno1b/Pfkl/Slc2a6/Tpi1/Pgam1/Ldha/Pkm/Ak4/Gapdh/Gale/Hmgcs1/Mvd/Aldoa/Pdk1/Gck/Dgat2/Galk1/Nme1/Slc27a3/Htr2a/Cda/Uck2/Prdx5/Ier3/Mvk/Guk1/Aldh1l2/Ran/Nme2/Eif6/Hmgcr/Nt5c/Gpi1/Entpd6/Acot7/Dctd/Nudt19/Mthfd1/Ampd1/Dctpp1/Adpgk/Ak1/Pcx/Me1/Guca1a/Pdk3/Enpp1/Hif1a/Ada/Ddit4/Txnrd1/Pmvk/Mdh2/Ak2/Dut/Acot4/Slc25a25/Dera/Ndufab1/Park7/Acot1/Cad/Nudt18/Gart/Pfkp/Fasn/Tkt/Dtymk/Tyms/Ump…
GO:0006399	tRNA metabolic process	163	0.428588	1.64864	0.000107786	0.000107786	0.00187534	4485	tags=43%, list=25%, signal=32%	Trmt61a/Pusl1/Dtd1/Nat10/Yrdc/Pop1/Nsun2/Farsa/Pus7/Pop7/Trmt6/Elp6/Polr3e/Exosc8/Ctu2/Polr2e/Lsm6/Tars2/Kti12/Dus2/Aarsd1/Exosc2/Wdr4/Thumpd1/Farsb/Ddx1/Polr3d/Trnt1/Pop5/Elac2/Dus1l/Mettl2/Ears2/Elp5/Yars2/Elp3/Elp1/Qtrt1/Rpp25l/Rpp30/Gatc/Zbtb8os/Elp4/Urm1/Thg1l/Ssb/Rpp14/Trp53rka/Rpp40/Hsd17b10/Tsen54/Pus1/Osgepl1/Mettl1/Tsen2/Rtraf/Trmt10a/Trmu/Bcdin3d/Polr2f/Mocs3/Lage3/Trmt10c/Mettl6/Nsun4…
GO:0009134	nucleoside diphosphate catabolic process	103	0.502978	1.80674	0.000109759	0.000109759	0.00189954	1079	tags=24%, list=6%, signal=23%	Aldoc/Eno1/Pgk1/Eno1b/Pfkl/Slc2a6/Tpi1/Pgam1/Pkm/Gapdh/Gale/Aldoa/Gck/Galk1/Htr2a/Ier3/Eif6/Gpi1/Entpd6/Adpgk/Enpp1/Hif1a/Ddit4/Nudt18/Pfkp
GO:0000387	spliceosomal snRNP assembly	33	0.700012	2.09887	0.000109962	0.000109962	0.00189954	3612	tags=64%, list=20%, signal=51%	Prpf31/Snrpd1/Gemin5/Strap/Lsm4/Wdr77/Tssc4/Prmt5/Lsm2/Gemin6/Snrpd3/Snrpb/Gemin7/Smn1/Sart3/Prmt7/Prpf19/Clns1a/Snrpd2/Gemin2/Usp4
GO:0039531	regulation of cytoplasmic pattern recognition receptor signaling pathway	105	-0.606946	-1.77017	0.000112782	0.000112782	0.00194132	1958	tags=28%, list=11%, signal=25%	Oasl1/Ifi204/Slc15a2/Rnf125/Plcg2/Dhx58/Zc3hav1/Slc15a3/Tlr4/Igtp/Casp4/Cav1/Fbxl2/Mndal/Trem2/Irgm2/Irgm1/Trim30a/Ifi203/Gbp2/Ddx60/Ifi207/Rsad2/Ifi208/Ifi206/Gbp5/Cd36/Ifi213/Ifi209
GO:0031639	plasminogen activation	20	0.777175	2.06828	0.000115101	0.000115101	0.00197421	101	tags=30%, list=1%, signal=30%	Eno1/Dhcr24/Pgk1/Eno1b/Thbs1/Serpine1
GO:0042102	positive regulation of T cell proliferation	106	-0.601166	-1.76095	0.00011847	0.00011847	0.00202481	2542	tags=35%, list=14%, signal=30%	Stat5b/Prkcq/Ccr7/Aif1/H2-Q7/Rasal3/H2-D1/Tyk2/Cd86/Xcl1/Stat5a/H2-DMb1/Cd55/Icosl/Syk/Irgm1/Tnfsf9/Cd46/H2-Q6/H2-T23/Il23a/Il15/Cd274/Coro1a/Il1b/Nckap1l/Cd24a/H2-Q4/Card11/Ptprc/Itgal/Ccr2/Kitl/Sash3/H2-DMb2/Cd28/Igf2
GO:0002367	cytokine production involved in immune response	136	-0.580252	-1.75414	0.000123545	0.000123545	0.00209815	2093	tags=32%, list=12%, signal=29%	Ticam2/Hfe/Axl/B2m/Tlr2/Acp5/Xcl1/Dennd1b/Plcg2/Trim6/Vsir/Gprc5b/Tlr4/Wnt5a/Casp4/Slamf9/Tek/Cd55/Irf5/Traf3ip2/Tlr3/P2rx7/Nlrp3/Tril/Syk/H2-Q6/Fcer1g/H2-T23/Laptm5/Il10/Il1b/H2-Q4/Cd74/Lilrb4a/Slc11a1/Nod2/Rsad2/Tlr7/Spon2/Ccr2/Sash3/Kit/Cd36/Gimap5
GO:0009595	detection of biotic stimulus	38	-0.738269	-1.88521	0.000123628	0.000123628	0.00209815	2493	tags=50%, list=14%, signal=43%	Atf2/H2-Q7/H2-D1/Tlr2/Tlr4/Fap/Casp4/Scarb1/Nlrp3/Trem2/Ly96/H2-Q6/Clec4n/H2-Q4/Tlr1/Pglyrp1/Naip2/Nod2/Dach1
GO:0045619	regulation of lymphocyte differentiation	197	-0.539873	-1.67385	0.00012457	0.00012457	0.00210594	2865	tags=35%, list=16%, signal=30%	Slamf8/Rara/H2-Oa/Zc3h12a/Smarcd2/Mmp14/Malt1/Stat5b/Ccr7/Rasgrp1/Slc46a2/Zmiz1/Sh3rf1/Vnn1/Fbxo7/Gli3/Zc3h8/Axl/Lag3/Zfp608/Zeb1/Il7r/Smarca2/Bmp4/Itpkb/Atp11c/Zfp36l1/Stat5a/Vsir/Nfam1/Irf1/Sh2b3/H2-DMa/Hlx/Nlrp3/Flt3l/Ptpn6/Sox13/Socs1/Syk/Tnfsf9/Cd46/Pik3r6/Spi1/Il10/Il23a/Il15/Nckap1l/Fgl2/Cd24a/Prdm1/Il2rg/Card11/Nfkbid/Dtx1/Inpp5d/Cd74/Lilrb4a/Pglyrp1/Ptprc/H2-Aa/Ccr2/Sash3/Cd83/Cd28/Lef1/…
GO:0032496	response to lipopolysaccharide	253	-0.505766	-1.59761	0.000125142	0.000125142	0.00210594	2202	tags=29%, list=12%, signal=26%	Cr2/Shpk/Stap1/Ticam2/Trim5/Axl/B2m/Lyn/Acp5/Cd86/Klrk1/Sash1/Sbno2/Plcg2/Trim6/Trim12c/Zfp36/Trim30d/Tlr4/Igtp/Trim12a/Casp4/Ncf2/Cd55/Scarb1/P2rx7/Nlrp3/Mrc1/Trem2/Cxcl9/Ly96/Irgm2/Cxcl10/Irgm1/Cd68/Ednra/Plscr4/Ogt/Trim30a/Cd180/Tnfrsf11a/Pde2a/Ptgir/Spi1/Il10/Cx3cr1/Cd274/Il1b/Cfh/Gbp2/Nos2/Cd14/Lilrb4a/Slc11a1/Ace/Tifab/Irf8/Gbp3/Abca1/Nod2/Cd84/Nos3/Tnip3/Spon2/Ptafr/Cd300lb/Gbp6/Ly86/Ednrb…
GO:0030183	B cell differentiation	134	-0.577752	-1.74153	0.000125394	0.000125394	0.00210594	2010	tags=29%, list=11%, signal=26%	Sp3/Polm/Bcl3/Dock10/Atp11c/Plcg2/Zfp36l1/Stat5a/Itm2a/Nfam1/Tpd52/Dll1/Notch2/Traf3ip2/Lyl1/Ptpn6/Dclre1c/Syk/Gpr183/H2-Ab1/Laptm5/Spi1/Il10/Ahr/Ikzf1/Nckap1l/Cd24a/Il2rg/Card11/Inpp5d/Lilrb4a/Hmga1/Ptprc/Irf8/Ighm/Kit/Hhex/Mfng/Gimap1
GO:0045785	positive regulation of cell adhesion	462	-0.45818	-1.48237	0.000125958	0.000125958	0.00210809	2575	tags=27%, list=14%, signal=24%	Lamb1/Malt1/Stat5b/Cdk6/Prkcq/Nrp1/Ccr7/Aif1/Rap1gap/H2-Q7/Rasgrp1/Lamc1/Zmiz1/Rasal3/Ecm2/H2-D1/Prex1/Vnn1/Rreb1/Gli3/Tyk2/Ephb4/B2m/Tgm2/Fbln1/Il7r/Ptn/Rin2/Dab2/Cd86/Col26a1/Smarca2/Cxcl12/Cyth3/Itpkb/Itga3/Xcl1/Smad3/P2ry12/Triobp/Pik3r2/Myoc/Stat5a/Emilin2/Vsir/H2-DMb1/Smoc2/Irf1/Dmd/Dennd6a/Jup/Flcn/Nid1/Wnt5a/Tek/Lama2/H2-DMa/Cd55/Hlx/Vtn/Cav1/Nlrp3/Ptpn6/Sox13/Ndnf/Icosl/Socs1/Syk/Spock2/…
GO:0002832	negative regulation of response to biotic stimulus	119	-0.58747	-1.74001	0.000128196	0.000128196	0.00213816	2270	tags=32%, list=13%, signal=28%	H2-D1/Clec2d/Trafd1/Isg15/Arrb2/Serping1/Ifi204/Grn/Tap1/Nmi/Dhx58/Igtp/Trim21/Mndal/Oas1a/Irgm2/Stat2/Irgm1/Oas1g/Parp14/H2-Q6/Oas1c/H2-T23/Nlrc5/Dtx4/Ahr/Ifi203/Fgl2/H2-Q4/Ifi207/Ifi208/Ifi206/Oas3/Ifi213/Klrd1/Igf2/Ifi209/Ceacam1
GO:1903555	regulation of tumor necrosis factor superfamily cytokine production	182	-0.535759	-1.65156	0.00013343	0.00013343	0.0022178	1635	tags=32%, list=9%, signal=29%	Axl/Arrb2/Bcl3/Tlr2/Acp5/Cd300ld/Zbtb20/Plcg2/Il33/Vsir/Fcgr3/Gpnmb/Zfp36/Akap12/Tlr4/Wnt5a/Ccl4/Ifih1/Tlr3/Ccl3/Ptpn6/Trem2/Syk/Oas1a/Csf1r/Ly96/Oas1g/Clu/Tyrobp/Trim30a/H2-Q6/Oas1c/Fcer1g/H2-T23/Il10/Il23a/Cx3cr1/Cd274/Cd24a/H2-Q4/Tlr1/Cd14/Lpl/Lilrb4a/Ptprc/Fcgr2b/Ccr5/Nod2/Cd2/Cd84/Oas2/Spon2/Ccr2/Cybb/Sash3/Ptafr/Oas3/Cd36
GO:0098660	inorganic ion transmembrane transport	582	-0.439699	-1.42732	0.000136127	0.000136127	0.00225488	2082	tags=18%, list=12%, signal=17%	Ank1/Atp6v0d2/Ptpn3/Abcc5/Ano5/Kcnip3/Nnt/Slc23a2/Lyn/Cacna2d2/Ubash3b/Fxyd3/Adra1a/Bmp4/Mcoln1/Xcl1/Scn2b/P2rx6/P2ry12/Agtr1a/Atp2b4/Akap7/Atp1b1/Plcg2/Wnk4/Kcnh3/Slc36a1/Pml/Ank2/Itpr3/Tpcn1/Plcb1/Dmd/Tcn2/Zfas1/Cacng7/Kcnj2/Fhl1/Steap4/Gjc2/Slc12a6/Cav1/P2rx7/Mcoln2/Ptpn6/Kcnq4/Steap3/Kcnh2/Trem2/Cxcl9/Klhl24/Agrn/Cxcl10/Mrln/Ednra/Slc24a5/Rem1/Kcnb1/Kcnt2/Nr3c2/Slc8b1/Plp1/Slc37a2/Scara5/Kcna…
GO:0001667	ameboidal-type cell migration	418	-0.458656	-1.48202	0.000137513	0.000137513	0.00227005	2106	tags=24%, list=12%, signal=22%	Bcas3/Sgpl1/Ephb4/Cygb/Pxn/Stc1/Egf/Arhgdib/Adora2b/Arsb/Efna1/Met/Rin2/Vegfc/Notch1/Nr2f2/Amot/Ptp4a3/Tns1/Cxcl12/Bmp4/Amotl1/Itga3/Grn/Irs1/Patz1/Pkn1/Atp2b4/Sash1/Pik3r2/Plcg2/Rffl/Stat5a/Ptprg/Tgfbr3/Pml/Smoc2/Gab2/Sema3f/Epha2/Cln3/Snai2/Alox12/Jup/Akap12/Fap/Vstm4/Wnt5a/Tek/Sema6a/Scarb1/Sema5a/Plxnd1/Gadd45a/Sema6b/Dcn/Glul/Appl2/Sp100/Ednra/Meox2/Clec14a/Sema6d/Itgb7/Gpld1/Sema4d/Itgb2/Se…
GO:0009191	ribonucleoside diphosphate catabolic process	102	0.496865	1.78363	0.000138149	0.000138149	0.00227005	1079	tags=24%, list=6%, signal=22%	Aldoc/Eno1/Pgk1/Eno1b/Pfkl/Slc2a6/Tpi1/Pgam1/Pkm/Gapdh/Gale/Aldoa/Gck/Galk1/Htr2a/Ier3/Eif6/Gpi1/Adpgk/Enpp1/Hif1a/Ddit4/Nudt18/Pfkp
GO:1903038	negative regulation of leukocyte cell-cell adhesion	138	-0.567815	-1.71395	0.000138451	0.000138451	0.00227005	2270	tags=28%, list=13%, signal=25%	Pla2g2d/H2-Q7/H2-D1/Gli3/Zc3h8/Hfe/Lag3/Zfp608/Cd86/Twsg1/Cxcl12/Bmp4/Vsir/Irf1/Gpnmb/Hlx/Ptpn6/Socs1/Lrrc32/Cd37/H2-Q6/Tnfrsf21/H2-T23/Laptm5/Cd274/Fgl2/Cd24a/H2-Q4/Nfkbid/Dtx1/Cd74/Lilrb4a/Tnfaip8l2/H2-Aa/Cd300a/Ripor2/Nrarp/Ceacam1/Gimap5
GO:0009060	aerobic respiration	156	0.430622	1.63178	0.000139766	0.000139766	0.00227897	4240	tags=53%, list=24%, signal=41%	Bnip3/Ak4/Cox7a1/Cox4i2/Shmt2/Cycs/Hif1a/Gadd45gip1/Mdh2/Cox5a/Dnajc15/Ndufab1/Park7/Uqcrq/Fxn/Atpsckmt/Arl2/Uqcc2/Mtfr1/Cox6a1/Suclg1/Fh1/Vcp/Ndufb8/Ndufa8/Ndufb10/Adsl/Cyc1/Ndufb6/Ndufs7/Chchd2/Idh2/Acly/Sdhb/Ndufs3/Slc25a33/Ndufs8/Cdk1/Coq9/Ndufa11/Ndufs5/Mdh1/Ndufs4/Ndufb9/Ndufb7/Ndufv1/Cox10/Idh3a/Mtch2/Sdhd/Mrps36/Ndufb11/Dlat/Uqcrc1/Ndufs6/Ndufb2/Bdnf/Stoml2/Dlst/Cox5b/Sucla2/Nupr1/Cs/Nduf…
GO:0009205	purine ribonucleoside triphosphate metabolic process	208	0.406014	1.62777	0.000139937	0.000139937	0.00227897	3755	tags=42%, list=21%, signal=33%	Aldoc/Eno1/Pgk1/Eno1b/Pfkl/Slc2a6/Tpi1/Pgam1/Pkm/Ak4/Gapdh/Gale/Aldoa/Gck/Galk1/Nme1/Htr2a/Ier3/Ran/Nme2/Eif6/Gpi1/Adpgk/Ak1/Enpp1/Hif1a/Ddit4/Slc25a25/Ndufab1/Pfkp/Tspo/Atpsckmt/Arl2/Impdh1/Nudt2/Foxk2/Vcp/Ndufb8/Ndufa8/Ndufb10/Ndufb6/Impdh2/Map2k1/Ola1/Hk1/Ndufs7/Sdhb/Nudt5/Hspa8/Ndufs3/Ndufs8/Itpa/Ndufa11/Ndufs5/Ndufs4/Parp1/Nme6/Ndufb9/Ndufb7/Ndufv1/Rhoq/Rab23/Mtch2/Sdhd/Efl1/Ndufb11/Prkag2/F…
GO:0042327	positive regulation of phosphorylation	620	-0.427109	-1.3868	0.000142703	0.000142703	0.00231621	2080	tags=21%, list=12%, signal=20%	Insr/Ephb4/Map2k6/Axl/Dgkq/Arrb2/Tspan9/Pxn/Card14/Egf/Prlr/Pink1/Parp9/Atg14/Lyn/Efna1/Met/Vegfc/Dab2/Cd86/Clip3/Ppargc1b/Adra1a/Bmp4/Irs1/Mmd/Mtcp1/Atp2b4/Sash1/Limch1/Plcg2/Trim6/Map3k5/Lrp4/Ghr/Wnk4/Il34/Gprc5b/Gfra1/Gpnmb/Epha2/Cln3/Tlr4/Flcn/Igtp/Rspo1/Map3k1/Notch2/Wnt5a/Tek/Vtn/Cav1/Map3k11/P2rx7/Flt3l/Ror1/Wdfy2/Trem2/Socs1/Arrb1/Syk/Spry2/Csf1r/Irgm2/Rgma/Agrn/Irgm1/Tslp/Ednra/Cspg4/Pel…
GO:1901607	alpha-amino acid biosynthetic process	49	0.610175	1.96969	0.000145024	0.000145024	0.00234601	1901	tags=43%, list=11%, signal=38%	Ass1/Bcat1/Asns/Plod2/Phgdh/Shmt2/Mthfd1/Psph/Plod3/Mtap/Psat1/Mri1/Park7/Cad/Dhfr/Aldh18a1/Pycr2/Got1/Aasdhppt/Pycr1/Bcat2
GO:2000516	positive regulation of CD4-positive, alpha-beta T cell activation	42	-0.722632	-1.87029	0.000147521	0.000147521	0.00237845	1408	tags=43%, list=8%, signal=40%	Xcl1/Irf1/Cd55/Hlx/Nlrp3/Socs1/Irgm1/Il23a/Nckap1l/Cd24a/Il2rg/Card11/Nfkbid/Ccr2/Sash3/Cd83/Cd28/Gimap5
GO:0071222	cellular response to lipopolysaccharide	176	-0.542106	-1.67	0.000148231	0.000148231	0.00237901	2202	tags=34%, list=12%, signal=30%	Cr2/Shpk/Stap1/Ticam2/Trim5/Axl/B2m/Lyn/Cd86/Klrk1/Sash1/Sbno2/Plcg2/Trim12c/Zfp36/Trim30d/Tlr4/Igtp/Trim12a/Cd55/Nlrp3/Mrc1/Trem2/Cxcl9/Ly96/Irgm2/Cxcl10/Irgm1/Cd68/Plscr4/Ogt/Trim30a/Cd180/Pde2a/Spi1/Il10/Cx3cr1/Cd274/Il1b/Cfh/Gbp2/Nos2/Cd14/Lilrb4a/Tifab/Irf8/Gbp3/Abca1/Nod2/Cd84/Nos3/Tnip3/Spon2/Cd300lb/Gbp6/Ly86/Cmpk2/Gbp5/Cd36/Fcgr4
GO:0009137	purine nucleoside diphosphate catabolic process	98	0.504744	1.80215	0.000149031	0.000149031	0.00237901	1079	tags=24%, list=6%, signal=23%	Aldoc/Eno1/Pgk1/Eno1b/Pfkl/Slc2a6/Tpi1/Pgam1/Pkm/Gapdh/Gale/Aldoa/Gck/Galk1/Htr2a/Ier3/Eif6/Gpi1/Adpgk/Enpp1/Hif1a/Ddit4/Nudt18/Pfkp
GO:0009181	purine ribonucleoside diphosphate catabolic process	98	0.504744	1.80215	0.000149031	0.000149031	0.00237901	1079	tags=24%, list=6%, signal=23%	Aldoc/Eno1/Pgk1/Eno1b/Pfkl/Slc2a6/Tpi1/Pgam1/Pkm/Gapdh/Gale/Aldoa/Gck/Galk1/Htr2a/Ier3/Eif6/Gpi1/Adpgk/Enpp1/Hif1a/Ddit4/Nudt18/Pfkp
GO:0002718	regulation of cytokine production involved in immune response	118	-0.595193	-1.76157	0.000153891	0.000153891	0.0024485	2093	tags=35%, list=12%, signal=31%	Ticam2/Hfe/Axl/B2m/Tlr2/Acp5/Xcl1/Dennd1b/Plcg2/Trim6/Vsir/Gprc5b/Tlr4/Wnt5a/Casp4/Tek/Cd55/Irf5/Tlr3/P2rx7/Nlrp3/Tril/Syk/H2-Q6/Fcer1g/H2-T23/Laptm5/Il10/Il1b/H2-Q4/Cd74/Lilrb4a/Nod2/Rsad2/Tlr7/Spon2/Ccr2/Sash3/Kit/Cd36/Gimap5
GO:0045576	mast cell activation	60	-0.663033	-1.81316	0.000154944	0.000154944	0.00244964	1457	tags=43%, list=8%, signal=40%	Chga/Rasgrp1/Fgr/Adora2b/Lyn/Fcgr3/Cplx2/Gab2/Tlr4/Lat2/Ptpn6/Syk/Stxbp2/Tslp/Enpp3/Fcer1g/Lilrb4a/Rac2/Cd48/Nppc/Cd84/Lcp2/Cd300lb/Cd300a/Gata2/Kit
GO:0050851	antigen receptor-mediated signaling pathway	154	-0.554947	-1.69052	0.000154975	0.000154975	0.00244964	2664	tags=31%, list=15%, signal=26%	Zc3h12a/Txk/Vav3/Mef2c/Rnf31/Malt1/Ccr7/Pde4b/H2-Q7/Lipa/H2-D1/Fyn/Stap1/Cd247/Lyn/Dennd1b/Plcg2/Nfam1/Lat2/Ptpn6/Ubash3a/Icosl/Syk/Blnk/Prkch/H2-Q6/Tnfrsf21/Cd38/Laptm5/Tec/Lpxn/Nckap1l/H2-Q4/Card11/Nfkbid/Lilrb4a/Bcl2a1d/Cd22/Ptprc/Themis2/Prkcb/Lcp2/Cd300a/Cd28/Klhl6/Ighm/Btnl9
GO:0051056	regulation of small GTPase mediated signal transduction	226	-0.5184	-1.62793	0.00015916	0.00015916	0.00250759	2490	tags=33%, list=14%, signal=29%	Arhgap12/Ralgps1/Dynlt1f/Cyth1/Rgl2/Git2/Nrp1/Lpar6/Rap1gap/Rasgrp1/Stard13/Rasal3/Ralgapa2/Arhgap24/Ralgapa1/Ophn1/Plxnb1/Cgnl1/Dennd4c/Stard8/Sipa1l3/Eps8/Arfgef3/Arhgdib/Met/Notch1/Amot/Adra1a/Cyth3/Itpkb/Itga3/Dynlt1a/Dynlt1b/Myoc/Dynlt1c/Lrp4/Arhgap18/Flcn/Syngap1/Sipa1/Psd/Notch2/Tek/Mcf2l/Chn1/Arrb1/Arhgap19/Spry2/Scai/Spry1/Agrn/Tagap/Arhgap20/Ogt/Iqsec3/Sema4d/Spry4/Lpar4/Fgf10/Gpr65/Arh…
GO:0071706	tumor necrosis factor superfamily cytokine production	189	-0.533739	-1.64998	0.000162821	0.000162821	0.0025524	1635	tags=29%, list=9%, signal=26%	Cd300ld/Zbtb20/Plcg2/Il33/Vsir/Fcgr3/Gpnmb/Zfp36/Akap12/Tlr4/Wnt5a/Slamf9/Ccl4/Ifih1/Tlr3/Ccl3/Ptpn6/Trem2/Syk/Oas1a/Csf1r/Ly96/Oas1g/Clu/Tyrobp/Trim30a/H2-Q6/Oas1c/Fcer1g/H2-T23/Il10/Il23a/Cx3cr1/Cd274/Cd24a/H2-Q4/Tlr1/Cd14/Lpl/Lilrb4a/Ptprc/Fcgr2b/Ccr5/Nod2/Cd2/Cd84/Oas2/Spon2/Ccr2/Cybb/Sash3/Ptafr/Oas3/Cd36
GO:0009154	purine ribonucleotide catabolic process	125	0.464448	1.72768	0.000163059	0.000163059	0.0025524	1079	tags=22%, list=6%, signal=21%	Aldoc/Eno1/Pgk1/Eno1b/Pfkl/Slc2a6/Tpi1/Pgam1/Pkm/Gapdh/Gale/Aldoa/Gck/Galk1/Htr2a/Ier3/Eif6/Nt5c/Gpi1/Acot7/Nudt19/Adpgk/Enpp1/Hif1a/Ada/Ddit4/Nudt18/Pfkp
GO:0019511	peptidyl-proline hydroxylation	12	0.877854	2.02667	0.000164432	0.000164432	0.00256559	1271	tags=67%, list=7%, signal=62%	Egln3/P4ha2/Egln1/P4ha1/P4hb/P4ha3/Prdx4/P3h2
GO:0140970	AIM2 inflammasome complex assembly	15	-0.866955	-1.84593	0.000167657	0.000167657	0.00260749	1873	tags=73%, list=10%, signal=66%	Ifi204/Aim2/Mndal/Ifi203/Gbp2/Ifi207/Ifi208/Ifi206/Gbp5/Ifi213/Ifi209
GO:0032652	regulation of interleukin-1 production	107	-0.599483	-1.75991	0.000172182	0.000172182	0.00266928	2028	tags=30%, list=11%, signal=27%	Arrb2/Tlr2/Ifi204/Acp5/Smad3/Aim2/Pml/Tlr4/Wnt5a/Casp4/Mndal/P2rx7/Nlrp3/Ccl3/Trem2/Serpinb1b/Tyrobp/Cx3cr1/Ifi203/Lpl/Lilrb4a/Il16/Ccr5/Nod2/Ifi207/Ifi208/Ifi206/Gbp5/Cd36/Ifi213/Ifi209/Ceacam1
GO:0045746	negative regulation of Notch signaling pathway	34	-0.751346	-1.87517	0.000174205	0.000174205	0.00269203	1788	tags=32%, list=10%, signal=29%	Rian/Gdpd5/Dll1/Arrb1/Egfl7/Gata2/Bmp7/Tspan15/Nrarp/Dlk1/Dll4
GO:0045165	cell fate commitment	215	-0.520968	-1.6276	0.000175809	0.000175809	0.00270816	1845	tags=21%, list=10%, signal=19%	Notch1/Nr2f2/Bmp4/Ebf2/Bvht/Myod1/Pml/Gli2/Tfap4/Dll1/Notch2/Wnt5a/Nfib/Ptch1/Tcf7l2/Sox13/Gas1/Spry2/Bhlhe22/Tbx2/Nfia/Ednra/Mitf/Notch3/Epas1/Casz1/Il23a/Prox1/Batf/AW551984/Prdm1/Wnt6/Fgf10/Ntf3/Pax7/Lhx6/Ly9/Jag2/Ptch2/Tenm4/Gata2/Eya1/Sox18/Kdr/Dll4
GO:0032640	tumor necrosis factor production	186	-0.530398	-1.63703	0.000178517	0.000178517	0.00274114	1635	tags=31%, list=9%, signal=29%	Axl/Arrb2/Bcl3/Tlr2/Acp5/Cd300ld/Zbtb20/Plcg2/Il33/Vsir/Fcgr3/Gpnmb/Zfp36/Akap12/Tlr4/Wnt5a/Slamf9/Ccl4/Ifih1/Tlr3/Ccl3/Ptpn6/Trem2/Syk/Oas1a/Csf1r/Ly96/Oas1g/Clu/Tyrobp/Trim30a/H2-Q6/Oas1c/Fcer1g/H2-T23/Il10/Il23a/Cx3cr1/Cd24a/H2-Q4/Tlr1/Cd14/Lpl/Lilrb4a/Ptprc/Fcgr2b/Ccr5/Nod2/Cd2/Cd84/Oas2/Spon2/Ccr2/Cybb/Sash3/Ptafr/Oas3/Cd36
GO:0070665	positive regulation of leukocyte proliferation	159	-0.547812	-1.68114	0.000182419	0.000182419	0.00279218	2691	tags=35%, list=15%, signal=30%	Bcl2l1/Vav3/Mef2c/Stat5b/Prkcq/Ccr7/Aif1/H2-Q7/Rasal3/H2-D1/Tyk2/Prlr/Lyn/Cd86/Xcl1/Stat5a/Il34/H2-DMb1/Tlr4/Cd55/Flt3l/Icosl/Syk/St6gal1/Csf1r/Csf2rb2/Irgm1/Gpr183/Tnfsf9/Cd46/H2-Q6/H2-T23/Cd38/Il23a/Il15/Cd274/Coro1a/Il1b/Nckap1l/Cd24a/H2-Q4/Fgf10/Card11/Cd74/Rac2/Csf2rb/Ptprc/Itgal/Ccr2/Kitl/Sash3/H2-DMb2/Cd28/Ighm/Kit/Igf2
GO:0050900	leukocyte migration	335	-0.479945	-1.53218	0.000183409	0.000183409	0.00279849	3167	tags=39%, list=18%, signal=32%	Nf1/Wnk1/Tnfrsf18/Kcnn4/Sell/Cyp7b1/Ptger4/Il27ra/Csf3r/Hsd3b7/Add2/Ccl24/Irak4/Hoxa7/Med23/Itgb3/Slamf8/Vav1/B4galt1/Il17ra/Dusp1/Vegfb/Arhgef5/Vav3/Mmp14/Myo1f/Stat5b/Dpep1/Mcu/Ccr7/Aif1/Pde4b/Myo1g/Chga/Stk10/Cmklr1/Ccl9/Prex1/Stap1/Itga2b/Eps8/Tlr2/Lyn/Cxcl14/Ptn/Vegfc/Itga1/Cxcl12/Padi2/Itga3/Xcl1/Mmp2/P2ry12/Il33/Il34/Fcgr3/Plcb1/Lrch1/Nbl1/Cd200/C3ar1/Wnt5a/Slamf9/Ccl4/Mcoln2/Ccl3/Cd34/Tre…
GO:0043300	regulation of leukocyte degranulation	42	-0.718747	-1.86023	0.000184731	0.000184731	0.00280979	1934	tags=38%, list=11%, signal=34%	Adora2b/Lyn/Gab2/Syk/Stxbp2/Fcer1g/Spi1/Itgb2/Nckap1l/Rac2/Nppc/Cd84/Ccr2/Ptafr/Cd300a/Gata2
GO:0006897	endocytosis	625	-0.42658	-1.38583	0.000185897	0.000185897	0.00281866	2570	tags=24%, list=14%, signal=22%	Myo1f/Ston2/Pip5k1c/Anxa11/Cfp/Alms1/Ccr7/Aif1/Myo1g/Fcho2/Rab27a/Washc5/Rap1gap/Nr1h3/Mertk/Fgr/Lipa/Ramp1/Snx33/Abca2/Dgkd/Prkn/Ophn1/Sgip1/Stap1/Colec12/Rab11fip2/Ticam2/Insr/Hfe/Axl/Dgkq/Arrb2/Fnbp1/Synj1/Neu3/Egf/B2m/Neurl1b/Tlr2/Sh3bp4/Tgm2/Arhgap21/Gulp1/Met/Gsn/Rin2/Dab2/Clip3/Grn/Ppt1/Sh3gl3/Dennd1b/Pear1/Plcg2/Ap3m2/Lrp4/Ehd2/Ghr/Fcgr3/Ank2/Dennd1c/Tpcn1/P2ry6/Cln3/Pot1b/Clcn5/Cacng7/Tl…
GO:0043269	regulation of monoatomic ion transport	405	-0.45912	-1.48111	0.000189128	0.000189128	0.00285869	2072	tags=22%, list=12%, signal=20%	Hfe/Ptpn3/Nkain4/Arrb2/Stc1/Egf/B2m/Kcnip3/Lyn/Gja1/Mllt6/Ubash3b/Fxyd3/Cxcl12/Bmp4/Scn2b/Hbp1/P2ry12/Agtr1a/Atp2b4/Akap7/Atp1b1/Plcg2/Wnk4/Pml/Ank2/Plcb1/Dmd/Zfas1/Kcnj2/Epb41/Fhl1/Car7/Dmpk/Gjc2/Cav1/P2rx7/Ptpn6/Best1/Kcnh2/Trem2/Cxcl9/Klhl24/Ctss/Agrn/Cxcl10/Mrln/Ednra/Rem1/Nr3c2/Slc8b1/Plp1/Ahr/Coro1a/Rapgef3/Kcnj13/Il16/Mmp9/Ace/Shank3/Cxcr4/Atp1b2/Chp2/Adcyap1r1/Cd84/Nos3/Chd7/Abcb1a/Cd300a…
GO:0042269	regulation of natural killer cell mediated cytotoxicity	47	-0.706372	-1.87531	0.00019063	0.00019063	0.00287066	2856	tags=47%, list=16%, signal=39%	Vav1/Tap2/Stat5b/H2-Q7/Rasgrp1/H2-D1/Clec2d/Arrb2/Lag3/Klrk1/Tap1/Stat5a/Klrb1a/H2-Q6/H2-T23/Pik3r6/H2-Q4/Cadm1/Klrd1/Igf2/Ceacam1/Gimap5
GO:0090130	tissue migration	301	-0.482112	-1.53449	0.000191106	0.000191106	0.00287066	2009	tags=26%, list=11%, signal=24%	Pxn/Stc1/Egf/Adora2b/Arsb/Efna1/Met/Rin2/Vegfc/Notch1/Nr2f2/Amot/Ptp4a3/Cxcl12/Bmp4/Amotl1/Itga3/Grn/Irs1/Patz1/Pkn1/Atp2b4/Sash1/Pik3r2/Plcg2/Stat5a/Ptprg/Tgfbr3/Smoc2/Gab2/Epha2/Cln3/Snai2/Alox12/Jup/Fap/Vstm4/Wnt5a/Tek/Scarb1/Sema5a/Plxnd1/Gadd45a/Dcn/Glul/Sp100/Meox2/Clec14a/Gpld1/Itgb2/Prox1/Plpp3/Coro1a/Mmrn2/Lpxn/Fgf10/Angpt2/Card10/Mmp9/Cxcr4/Fgf16/Col18a1/Fgf1/Nos3/Pkn3/Kitl/Gata2/Flt4/K…
GO:0006909	phagocytosis	200	-0.526884	-1.63958	0.000194073	0.000194073	0.00290459	2561	tags=35%, list=14%, signal=30%	Pip5k1c/Anxa11/Cfp/Ccr7/Aif1/Myo1g/Rab27a/Washc5/Rap1gap/Nr1h3/Mertk/Fgr/Stap1/Colec12/Rab11fip2/Ticam2/Axl/Tlr2/Tgm2/Gulp1/Met/Gsn/Pear1/Plcg2/Fcgr3/P2ry6/Cln3/Pot1b/Tlr4/Rab20/Elmo1/Ncf2/Bin2/Scarb1/P2rx7/Trem2/Msr1/C2/Syk/Appl2/Colec11/Camk1d/Tyrobp/Ncf4/Fcer1g/Itgb2/Il15/Coro1a/Nckap1l/Il2rg/Il2rb/Slc11a1/Dock2/Ptprc/Irf8/Pld4/Fcgr2b/Abca1/Nod2/Hck/Itgal/Lepr/Arhgap25/Spon2/Ccr2/Fcgr1/Cd300a/…
GO:0031348	negative regulation of defense response	229	-0.511754	-1.61142	0.000194566	0.000194566	0.00290459	2270	tags=27%, list=13%, signal=24%	H2-D1/Clec2d/Trafd1/Isg15/Arnt/Arrb2/Serping1/Ifi204/Acp5/Grn/Tap1/Smad3/Nmi/Il33/Dhx58/Zfp36/Cd200/Igtp/Trim21/Mndal/Nlrp3/Ptpn6/Trem2/Oas1a/Irgm2/Stat2/Irgm1/Oas1g/Enpp3/Socs3/Parp14/Aoah/H2-Q6/Oas1c/H2-T23/Il10/Nlrc5/Dtx4/Cx3cr1/Ahr/Ifi203/Fgl2/Cd24a/H2-Q4/Tnfaip8l2/Pglyrp1/Wfdc1/Fcgr2b/Nod2/Ifi207/Il10ra/Ifi208/Ifi206/Oas3/Ifi213/Klrd1/Ctla2a/Igf2/Ifi209/Ceacam1/Cdh5
GO:0032835	glomerulus development	66	-0.653591	-1.82344	0.000202535	0.000202535	0.00301425	1845	tags=39%, list=10%, signal=35%	Notch1/Bmp4/Foxc1/Lgr4/Notch2/Nid1/C3ar1/Col4a4/Tek/Mtss1/Ednra/Enpep/Notch3/Pdgfra/Ahr/Ptpro/Cd24a/Cfh/Angpt2/Klf15/Gpr4/Ednrb/Bmp7/Aqp1/Pdgfb/Agtr2
GO:0032680	regulation of tumor necrosis factor production	179	-0.532399	-1.63915	0.000203708	0.000203708	0.00302241	1635	tags=32%, list=9%, signal=29%	Axl/Arrb2/Bcl3/Tlr2/Acp5/Cd300ld/Zbtb20/Plcg2/Il33/Vsir/Fcgr3/Gpnmb/Zfp36/Akap12/Tlr4/Wnt5a/Ccl4/Ifih1/Tlr3/Ccl3/Ptpn6/Trem2/Syk/Oas1a/Csf1r/Ly96/Oas1g/Clu/Tyrobp/Trim30a/H2-Q6/Oas1c/Fcer1g/H2-T23/Il10/Il23a/Cx3cr1/Cd24a/H2-Q4/Tlr1/Cd14/Lpl/Lilrb4a/Ptprc/Fcgr2b/Ccr5/Nod2/Cd2/Cd84/Oas2/Spon2/Ccr2/Cybb/Sash3/Ptafr/Oas3/Cd36
GO:0070972	protein localization to endoplasmic reticulum	72	0.5621	1.91005	0.000208129	0.000208129	0.00307856	4019	tags=57%, list=23%, signal=44%	Hspa5/Insig1/Ubl4a/Srprb/Sec61b/Spcs2/Kdelr3/Vapa/Sec61a1/Srp9/Srp72/Rer1/Arxes2/Srp19/Spcs1/Spcs3/Gbf1/Rtn4/Ddrgk1/Kdelr2/Arxes1/Sec63/Btf3/Ppp1r15a/Rab3gap2/Sec61g/Edem1/Bcap31/Mia3/Bag6/Srp14/Sgta/Ssr3/Herpud1/Rab10/Sec16a/Kdelr1/Lrrk2/Folr1/Gabarapl2/Tram1
GO:0006163	purine nucleotide metabolic process	430	0.327595	1.38774	0.000209516	0.000209516	0.00308963	3546	tags=35%, list=20%, signal=29%	Aldoc/Eno1/Pgk1/Eno1b/Pfkl/Slc2a6/Tpi1/Pgam1/Ldha/Pkm/Ak4/Gapdh/Gale/Hmgcs1/Mvd/Aldoa/Pdk1/Gck/Dgat2/Galk1/Nme1/Slc27a3/Htr2a/Prdx5/Ier3/Mvk/Guk1/Aldh1l2/Ran/Nme2/Eif6/Hmgcr/Nt5c/Gpi1/Acot7/Nudt19/Mthfd1/Ampd1/Adpgk/Ak1/Pcx/Me1/Guca1a/Pdk3/Enpp1/Hif1a/Ada/Ddit4/Txnrd1/Pmvk/Mdh2/Ak2/Acot4/Slc25a25/Ndufab1/Acot1/Nudt18/Gart/Pfkp/Fasn/Tkt/Gmpr2/Tspo/Atpsckmt/Pgd/Mpc1/Arl2/Vdac1/Atic/Adcy2/Impdh1/Pgl…
GO:0071456	cellular response to hypoxia	108	0.496149	1.77635	0.000219463	0.000219463	0.00321706	838	tags=25%, list=5%, signal=24%	Mgarp/Egln3/Higd1a/Eno1/Fam162a/Pgk1/Bnip3/Eno1b/Ddah1/Ak4/Pdk1/Egln1/Vegfa/Plk3/Eif4ebp1/Hyou1/Ptgis/Nol3/Vasn/Rgcc/Suv39h2/Pdk3/Ajuba/Hif1a/Tbl2/Twist1/P4hb
GO:0002715	regulation of natural killer cell mediated immunity	48	-0.703786	-1.87683	0.000219488	0.000219488	0.00321706	2856	tags=46%, list=16%, signal=39%	Vav1/Tap2/Stat5b/H2-Q7/Rasgrp1/H2-D1/Clec2d/Arrb2/Lag3/Klrk1/Tap1/Stat5a/Klrb1a/H2-Q6/H2-T23/Pik3r6/H2-Q4/Cadm1/Klrd1/Igf2/Ceacam1/Gimap5
GO:0030888	regulation of B cell proliferation	62	-0.652716	-1.7917	0.000225188	0.000225188	0.00329063	1959	tags=37%, list=11%, signal=33%	Prlr/Lyn/Pkn1/Mzb1/Tlr4/Gpr183/Tyrobp/Tnfrsf21/Cd38/Tnfrsf13b/Il10/Ahr/Nckap1l/Cd24a/Card11/Inpp5d/Cd74/Cd22/Ptprc/Fcgr2b/Sash3/Cd300a/Ighm
GO:0006195	purine nucleotide catabolic process	135	0.440241	1.64054	0.000227827	0.000227827	0.00331917	766	tags=19%, list=4%, signal=19%	Aldoc/Eno1/Pgk1/Eno1b/Pfkl/Slc2a6/Tpi1/Pgam1/Pkm/Gapdh/Gale/Aldoa/Gck/Galk1/Htr2a/Ier3/Eif6/Nt5c/Gpi1/Acot7/Nudt19/Adpgk/Enpp1/Hif1a/Ada/Ddit4
GO:0035710	CD4-positive, alpha-beta T cell activation	118	-0.586286	-1.7352	0.000228827	0.000228827	0.00332372	2574	tags=31%, list=14%, signal=27%	Malt1/Prkcq/Ccr7/Pla2g2d/Sh3rf1/Cracr2a/Bcl3/Stat4/Twsg1/Xcl1/Vsir/Irf1/Satb1/Cd55/Hlx/Nlrp3/Socs1/Irgm1/Gpr183/Il23a/Cd274/Batf/Nckap1l/Cd24a/Il2rg/Card11/Nfkbid/Lilrb4a/Rsad2/Ly9/Ccr2/Sash3/Cd83/Cd28/Lef1/Gimap5/Gimap1
GO:0032946	positive regulation of mononuclear cell proliferation	145	-0.556893	-1.68458	0.000229777	0.000229777	0.00332754	2691	tags=34%, list=15%, signal=30%	Bcl2l1/Vav3/Mef2c/Stat5b/Prkcq/Ccr7/Aif1/H2-Q7/Rasal3/H2-D1/Tyk2/Prlr/Cd86/Xcl1/Stat5a/H2-DMb1/Tlr4/Cd55/Flt3l/Icosl/Syk/St6gal1/Csf1r/Irgm1/Gpr183/Tnfsf9/Cd46/H2-Q6/H2-T23/Cd38/Il23a/Il15/Cd274/Coro1a/Il1b/Nckap1l/Cd24a/H2-Q4/Fgf10/Card11/Cd74/Ptprc/Itgal/Ccr2/Kitl/Sash3/H2-DMb2/Cd28/Ighm/Igf2
GO:0019439	aromatic compound catabolic process	483	0.310657	1.33087	0.00024027	0.00024027	0.0034691	2376	tags=23%, list=13%, signal=21%	Dio3/Aldoc/Eno1/Pgk1/Eno1b/Pfkl/Slc2a6/Tpi1/Pgam1/Pkm/Gapdh/Gale/Pdxp/Aldoa/Gck/Galk1/Htr2a/Vegfa/Cda/Ier3/Gdnf/Endog/Aldh1l2/Mrto4/Eif6/Zpr1/Nt5c/Gpi1/Ybx1/Gspt1/Entpd6/Pop1/Acot7/Nudt19/Etf1/Dctpp1/Adpgk/Isg20/Nsun2/Nbas/Enpp1/Hif1a/Ada/Ddit4/Comt/Exosc4/Pabpc4/Dut/Dera/Lsm4/Nudt18/Exosc5/Zcchc17/Ddx49/Pfkp/Fen1/Tbrg4/Hnrnpab/Vim/Exosc8/Lsm6/Btg2/Aasdhppt/Gmpr2/Exosc1/Hmox1/Arl2/Ptbp1/Magoh/Eif…
GO:0001911	negative regulation of leukocyte mediated cytotoxicity	32	-0.756665	-1.86919	0.000241755	0.000241755	0.00348016	2396	tags=47%, list=13%, signal=41%	H2-Q7/H2-D1/Clec2d/Arrb2/Il7r/Tap1/H2-Q6/H2-T23/Cx3cr1/Nckap1l/H2-Q4/Ptprc/Klrd1/Igf2/Ceacam1
GO:0061760	antifungal innate immune response	17	-0.839451	-1.84316	0.000242912	0.000242912	0.00348643	1886	tags=59%, list=11%, signal=53%	Clec4a3/Plcg2/Clec4d/Spi1/Clec4n/Clec4e/Cx3cr1/Clec4a1/Clec4a2/Clec4b1
GO:0030099	myeloid cell differentiation	423	-0.452779	-1.4637	0.000244118	0.000244118	0.00349338	2310	tags=24%, list=13%, signal=22%	Thpo/Lipa/Clec2d/Lbr/Ccl9/Isg15/Gnas/Stap1/Hoxa9/Gpr137b/Ank1/Sp3/B2m/Meis1/Tlr2/Foxo3/Lyn/Ifi204/Dab2/Nemp1/Ubash3b/Ppargc1b/Bmp4/Itpkb/Gab3/Sbno2/Zfp36l1/Il33/Stat5a/Tgfbr3/Il34/Pml/Plcb1/Gab2/Zfp36/Epha2/Ypel4/Sh2b3/Tlr4/Dll1/Fli1/Mturn/Notch2/Gpc3/Tmem64/Tspan2/Mndal/Exoc6/Ccl3/Ptpn6/Trem2/Socs1/C1qc/Csf1r/Gpr183/Zbtb46/Dnase2a/Hoxb7/Tnfsf9/Mitf/Tyrobp/Prxl2a/Epas1/Fcer1g/Tnfrsf11a/Pirb/Spi1/…
GO:0048732	gland development	377	-0.460955	-1.48491	0.000245118	0.000245118	0.00349733	2207	tags=24%, list=12%, signal=22%	Agap2/Rreb1/Orai1/Gli3/Scd1/Hoxa9/Mrtfb/Ncoa3/Insr/Sp3/Zfp157/Egf/Prlr/Tgm2/Rps6ka1/Met/Ptn/Atf7/Gja1/Notch1/Twsg1/Bmp4/Ccdc40/Ntn4/Psap/Irs1/Smad3/Foxc1/Mmp2/Hoxd9/Igf2r/Stat5a/Tgfbr3/Pml/Gli2/Epha2/Zfas1/Ly6e/Snai2/Meg3/Hoxa3/Notch2/Jarid2/Wnt5a/Ccdc39/Nfib/Hlx/Ezh1/Vtn/Cav1/Ntn1/Ptch1/Tcf7l2/Eda/Plxnd1/Bcl2l11/Pthlh/Tbx2/Ednra/Etv5/Hmga2/Ctns/Tnfrsf11a/Cbx7/Ccnd1/Igfbp5/Pdgfra/Prox1/Ahr/Ikzf1/…
GO:0006261	DNA-templated DNA replication	143	0.429023	1.60556	0.0002473	0.0002473	0.00351809	4702	tags=49%, list=26%, signal=36%	Ooep/Endog/Zpr1/Wdr18/Pole4/Cenpx/Gins2/Mcm5/Ccne1/Orc2/Ccne2/Pold2/Pole3/Rfc2/Mcm3/Rrm1/Rfc5/Baz1a/Mcm10/Mcm6/Ticrr/Nucks1/Pold1/Topbp1/Cenps/Rad51/Mcm4/Lig3/Rbbp8/Polq/Parp1/Gins4/Orc6/Senp2/Cdk9/Zmpste24/Brca1/Ino80/E2f7/Chtf18/Pcna/Orc1/Dbf4/Pole/Carm1/Recql/Dscc1/Tipin/Zfp365/Tonsl/Upf1/Mcm2/Chrac1/Gins1/Rrm2b/Ilkap/Donson/Mms22l/Mcm7/Rnaseh1/Tk1/Prim1/Nbn/Fgfr1/Zfp830/Lig1/Atad5/Cdc45/Blm/H…
GO:0008033	tRNA processing	119	0.46199	1.70609	0.000249494	0.000249494	0.00353631	4485	tags=45%, list=25%, signal=34%	Trmt61a/Pusl1/Nat10/Yrdc/Pop1/Nsun2/Pus7/Pop7/Trmt6/Elp6/Ctu2/Lsm6/Kti12/Dus2/Wdr4/Thumpd1/Ddx1/Trnt1/Pop5/Elac2/Dus1l/Mettl2/Elp5/Elp3/Elp1/Qtrt1/Rpp25l/Rpp30/Zbtb8os/Elp4/Urm1/Thg1l/Ssb/Rpp14/Rpp40/Hsd17b10/Tsen54/Pus1/Osgepl1/Mettl1/Tsen2/Rtraf/Trmt10a/Trmu/Bcdin3d/Mocs3/Lage3/Trmt10c/Mettl6/Nsun4/Rtcb/Tsen15/Pop4
GO:0006935	chemotaxis	375	-0.464115	-1.49497	0.000250043	0.000250043	0.00353631	1904	tags=26%, list=11%, signal=24%	Lyn/Met/Cxcl14/Ptn/Vegfc/Notch1/Amot/Itga1/Cxcl12/Padi2/Xcl1/Smad3/Lgr4/Mmp2/P2ry12/Agtr1a/Cysltr1/Il34/Fcgr3/Smoc2/Nbl1/Sema3f/Epha2/Snai2/C3ar1/Wnt5a/Ccrl2/Slamf9/Bin2/Ccl4/Sema6a/Rtn4rl1/Ntn1/Sema5a/Robo2/Ccl3/Trem2/Sema6b/Cxcl9/Syk/St6gal1/Csf1r/Agrn/Cxcl10/Camk1d/Gpr183/Ednra/Defb25/Sema6d/Nova2/Ackr4/Ccl8/Fcer1g/Slc8b1/Sema4d/Spi1/Itgb2/Sema3g/Dapk2/Il23a/Pdgfra/Cx3cr1/Coro1a/Il1b/Nckap1l/P…
GO:0045580	regulation of T cell differentiation	170	-0.527835	-1.62236	0.00025231	0.00025231	0.00355796	2574	tags=32%, list=14%, signal=28%	Rara/H2-Oa/Zc3h12a/Smarcd2/Malt1/Stat5b/Ccr7/Rasgrp1/Slc46a2/Zmiz1/Sh3rf1/Vnn1/Gli3/Zc3h8/Lag3/Zfp608/Zeb1/Il7r/Smarca2/Bmp4/Itpkb/Stat5a/Vsir/Irf1/Sh2b3/H2-DMa/Hlx/Nlrp3/Sox13/Socs1/Syk/Tnfsf9/Cd46/Pik3r6/Il23a/Il15/Nckap1l/Fgl2/Prdm1/Il2rg/Card11/Nfkbid/Dtx1/Cd74/Lilrb4a/Ptprc/H2-Aa/Ccr2/Sash3/Cd83/Cd28/Lef1/Nrarp/Ctla2a/Gimap5
GO:0006816	calcium ion transport	358	-0.472198	-1.51765	0.000260725	0.000260725	0.00365599	1981	tags=22%, list=11%, signal=20%	Stc1/Egf/Lyn/Gja1/Cacna2d2/Ubash3b/Cxcl12/Adra1a/Bmp4/Mcoln1/Xcl1/P2rx6/P2ry12/Agtr1a/Atp2b4/Atp1b1/Plcg2/Cysltr1/Pml/Ank2/Itpr3/Tpcn1/Plcb1/Dmd/Zfas1/Srl/Cacng7/Epb41/Gjc2/Cav1/P2rx7/Mcoln2/Ptpn6/Best1/Cxcl9/Ramp2/Cxcl10/Mrln/Ednra/Slc24a5/Rem1/Calcrl/Ccl8/Slc8b1/Plp1/Ahr/Coro1a/Atp2a1/Cacna1h/Rapgef3/Tmem37/Il16/Ace/Cxcr4/Ptprc/Ccr5/Grin2b/Adcyap1r1/Cd84/Nos3/Prkcb/Chd7/Trpm5/Clec4b1/Atp2a3/Edn…
GO:0002714	positive regulation of B cell mediated immunity	51	-0.693045	-1.85859	0.000261528	0.000261528	0.00365599	2396	tags=31%, list=13%, signal=27%	H2-Q7/Shld1/H2-D1/Xcl1/Tnfsf13/Fcgr3/Trem2/H2-Q6/Fcer1g/H2-T23/H2-Q4/Ptprc/Nod2/Fcgr1/Cd28/Gimap5
GO:0002891	positive regulation of immunoglobulin mediated immune response	51	-0.693045	-1.85859	0.000261528	0.000261528	0.00365599	2396	tags=31%, list=13%, signal=27%	H2-Q7/Shld1/H2-D1/Xcl1/Tnfsf13/Fcgr3/Trem2/H2-Q6/Fcer1g/H2-T23/H2-Q4/Ptprc/Nod2/Fcgr1/Cd28/Gimap5
GO:0000027	ribosomal large subunit assembly	24	0.744538	2.06515	0.000270794	0.000270794	0.00375877	2191	tags=54%, list=12%, signal=48%	Bop1/Mrto4/Eif6/Ppan/Mrpl20/Nop2/Nle1/Mdn1/Brix1/Rrs1/Rpf2/Rplp0/Rpl11
GO:0002456	T cell mediated immunity	115	-0.580432	-1.71699	0.000271009	0.000271009	0.00375877	2692	tags=34%, list=15%, signal=29%	Tap2/Mr1/Malt1/Myo1g/Rab27a/H2-Q7/H2-D1/Cr2/Kdm5d/Hfe/B2m/Il7r/Xcl1/Dennd1b/Unc93b1/Vsir/Cd55/P2rx7/Nlrp3/Slfn2/Cd46/H2-Q6/H2-T23/Il23a/Ahr/H2-T24/Il1b/Nckap1l/Cd24a/H2-Q4/Mill2/Lilrb4a/Slc11a1/Ptprc/Nod2/Rsad2/Ccr2/Sash3/Klrd1
GO:0050671	positive regulation of lymphocyte proliferation	142	-0.559833	-1.69425	0.000271212	0.000271212	0.00375877	2664	tags=34%, list=15%, signal=29%	Vav3/Mef2c/Stat5b/Prkcq/Ccr7/Aif1/H2-Q7/Rasal3/H2-D1/Tyk2/Prlr/Cd86/Xcl1/Stat5a/H2-DMb1/Tlr4/Cd55/Flt3l/Icosl/Syk/Csf1r/Irgm1/Gpr183/Tnfsf9/Cd46/H2-Q6/H2-T23/Cd38/Il23a/Il15/Cd274/Coro1a/Il1b/Nckap1l/Cd24a/H2-Q4/Fgf10/Card11/Cd74/Ptprc/Itgal/Ccr2/Kitl/Sash3/H2-DMb2/Cd28/Ighm/Igf2
GO:0072012	glomerulus vasculature development	26	-0.779885	-1.85467	0.000272543	0.000272543	0.00376641	1845	tags=50%, list=10%, signal=45%	Notch1/Bmp4/Notch2/C3ar1/Tek/Ednra/Notch3/Pdgfra/Angpt2/Gpr4/Bmp7/Aqp1/Pdgfb
GO:0140972	negative regulation of AIM2 inflammasome complex assembly	11	-0.893815	-1.79405	0.000286029	0.000286029	0.00393545	1070	tags=73%, list=6%, signal=68%	Ifi204/Mndal/Ifi203/Ifi207/Ifi208/Ifi206/Ifi213/Ifi209
GO:0072521	purine-containing compound metabolic process	456	0.326348	1.39951	0.000286401	0.000286401	0.00393545	3546	tags=36%, list=20%, signal=29%	Aldoc/Eno1/Pgk1/Eno1b/Pfkl/Slc2a6/Tpi1/Pgam1/Ldha/Pkm/Ak4/Gapdh/Gale/Hmgcs1/Mvd/Aldoa/Pdk1/Gck/Dgat2/Galk1/Nme1/Slc27a3/Htr2a/Prdx5/Ier3/Mvk/Guk1/Aldh1l2/Ran/Nme2/Eif6/Hmgcr/Nt5c/Gpi1/Acot7/Nudt19/Mthfd1/Pemt/Ampd1/Adpgk/Ak1/Pcx/Me1/Guca1a/Pdk3/Enpp1/Hif1a/Ada/Ddit4/Mtap/Txnrd1/Pmvk/Mdh2/Ak2/Acot4/Slc25a25/Ndufab1/Acot1/Nudt18/Gart/Pfkp/Fasn/Tkt/Macrod1/Gmpr2/Tspo/Atpsckmt/Pgd/Mpc1/Arl2/Vdac1/Ati…
GO:0010631	epithelial cell migration	299	-0.482662	-1.53526	0.000289278	0.000289278	0.00396372	2009	tags=26%, list=11%, signal=24%	Pxn/Stc1/Egf/Adora2b/Arsb/Efna1/Met/Rin2/Vegfc/Notch1/Nr2f2/Amot/Ptp4a3/Cxcl12/Bmp4/Amotl1/Itga3/Grn/Irs1/Patz1/Pkn1/Atp2b4/Sash1/Pik3r2/Plcg2/Stat5a/Ptprg/Tgfbr3/Smoc2/Gab2/Epha2/Cln3/Snai2/Alox12/Jup/Fap/Vstm4/Wnt5a/Tek/Scarb1/Sema5a/Plxnd1/Gadd45a/Dcn/Glul/Sp100/Meox2/Clec14a/Gpld1/Itgb2/Prox1/Plpp3/Coro1a/Mmrn2/Lpxn/Fgf10/Angpt2/Card10/Mmp9/Cxcr4/Fgf16/Col18a1/Fgf1/Nos3/Pkn3/Kitl/Gata2/Flt4/K…
GO:0042330	taxis	376	-0.463888	-1.4945	0.000291806	0.000291806	0.00398706	1904	tags=26%, list=11%, signal=24%	Lyn/Met/Cxcl14/Ptn/Vegfc/Notch1/Amot/Itga1/Cxcl12/Padi2/Xcl1/Smad3/Lgr4/Mmp2/P2ry12/Agtr1a/Cysltr1/Il34/Fcgr3/Smoc2/Nbl1/Sema3f/Epha2/Snai2/C3ar1/Wnt5a/Ccrl2/Slamf9/Bin2/Ccl4/Sema6a/Rtn4rl1/Ntn1/Sema5a/Robo2/Ccl3/Trem2/Sema6b/Cxcl9/Syk/St6gal1/Csf1r/Agrn/Cxcl10/Camk1d/Gpr183/Ednra/Defb25/Sema6d/Nova2/Ackr4/Ccl8/Fcer1g/Slc8b1/Sema4d/Spi1/Itgb2/Sema3g/Dapk2/Il23a/Pdgfra/Cx3cr1/Coro1a/Il1b/Nckap1l/P…
GO:1903305	regulation of regulated secretory pathway	127	-0.574546	-1.7204	0.000296577	0.000296577	0.00404084	1934	tags=21%, list=11%, signal=19%	Adora2b/Lyn/Notch1/Fbxl20/Sv2c/Ppfia2/Gab2/P2rx7/Syk/Stxbp2/Kcnb1/Fcer1g/Spi1/Itgb2/Npy1r/Cacna1h/Nckap1l/Rac2/Nppc/Cd84/Ccr2/Prkcb/Ptafr/Cd300a/Gata2/P2ry1/Syt13
GO:0019882	antigen processing and presentation	96	-0.597193	-1.72208	0.000300544	0.000300544	0.00408338	2888	tags=46%, list=16%, signal=39%	Ctsl/H2-Oa/Rab5b/Tap2/Mr1/Tapbpl/Ccr7/Rab27a/H2-Q7/H2-D1/Kdm5d/Hfe/B2m/Mfsd6/Psap/Tap1/Psmb9/Unc93b1/H2-DMb1/Fcgr3/H2-DMa/Trem2/Ctss/Cd68/H2-Ab1/H2-Q6/Fcer1g/H2-T23/Ifi30/Mpeg1/H2-T24/Fgl2/H2-Q4/Mill2/Cd74/Slc11a1/H2-Eb1/Fcgr2b/Nod2/H2-Aa/H2-DMb2/Fcgr1/Ighm/Fcgr4
GO:0000470	maturation of LSU-rRNA	29	0.712716	2.05681	0.000313248	0.000313248	0.00424406	2930	tags=69%, list=16%, signal=58%	Bop1/Eif6/Nhp2/Ftsj3/Mak16/Rrp15/Nop2/Rsl1d1/Znhit6/Rpf2/Rpl7l1/Pes1/Npm1/Wdr12/Nol9/Rpl10a/Las1l/Ddx18/Nifk/Gtpbp4
GO:0051345	positive regulation of hydrolase activity	433	-0.453148	-1.46748	0.000316899	0.000316899	0.00428004	2405	tags=28%, list=13%, signal=25%	Ctsl/Stat1/Vav1/Tbc1d5/Ralgps1/Rhog/Arhgef5/Txk/Tmem106b/Casp1/Npnt/Mef2c/Malt1/Aph1c/Casp2/Ccr7/Apaf1/Rap1gap/Rasgrp1/Nr1h3/Dock11/Ralgapa2/Arhgap24/Ccl9/Gpihbp1/Prex1/Agap2/Arap2/Ralgapa1/Wrn/Plxnb1/Gnas/Rab11fip2/Rasgef1b/Gmip/Casp9/Lyn/Efna1/Gsn/Ifi204/Cd86/Itga1/Ppargc1b/Psap/Ralgps2/Xcl1/Grn/Smad3/Dock10/Dennd1b/Agtr1a/Tbc1d16/Agap1/Map3k5/Aim2/Pmaip1/Vsir/Dapk1/Pml/Tbc1d4/Epha2/Cd200/Tfap4…
GO:0042773	ATP synthesis coupled electron transport	65	0.558521	1.88853	0.000318558	0.000318558	0.00428004	4754	tags=62%, list=27%, signal=45%	Cox7a1/Cox4i2/Cycs/Cox5a/Dnajc15/Park7/Uqcrq/Cox6a1/Ndufb8/Ndufa8/Cyc1/Ndufb6/Ndufs7/Chchd2/Sdhb/Ndufs3/Ndufs8/Cdk1/Coq9/Ndufb9/Ndufv1/Mtch2/Sdhd/Uqcrc1/Ndufs6/Bdnf/Cox5b/Coq7/Ndufv3/Uqcr11/Ndufv2/Ndufs2/Ndufa12/Ndufa10/Uqcrc2/Ndufc2/Cox7b/Sdhaf2/Cox4i1/Ndufs1
GO:0042775	mitochondrial ATP synthesis coupled electron transport	65	0.558521	1.88853	0.000318558	0.000318558	0.00428004	4754	tags=62%, list=27%, signal=45%	Cox7a1/Cox4i2/Cycs/Cox5a/Dnajc15/Park7/Uqcrq/Cox6a1/Ndufb8/Ndufa8/Cyc1/Ndufb6/Ndufs7/Chchd2/Sdhb/Ndufs3/Ndufs8/Cdk1/Coq9/Ndufb9/Ndufv1/Mtch2/Sdhd/Uqcrc1/Ndufs6/Bdnf/Cox5b/Coq7/Ndufv3/Uqcr11/Ndufv2/Ndufs2/Ndufa12/Ndufa10/Uqcrc2/Ndufc2/Cox7b/Sdhaf2/Cox4i1/Ndufs1
GO:0060562	epithelial tube morphogenesis	336	-0.471802	-1.50652	0.00032073	0.00032073	0.00429729	2663	tags=27%, list=15%, signal=23%	Npnt/Mef2c/Mmp14/Cc2d2a/Nr3c1/Pik3cd/Nrp1/Spint2/Tead2/Apaf1/Osr1/Stard13/Vangl2/Ift122/Gli3/Ncoa3/C2cd3/Aldh1a2/Pxn/Egf/Tmem67/Met/Gja1/Notch1/Cxcl12/Bmp4/Ccdc40/Smad3/Lgr4/Agtr1a/Foxd1/Wnk4/Pml/Col4a1/Tctn1/Gli2/Epha2/Adamts12/Alox12/Dll1/Bmp5/Notch2/Gpc3/Wnt5a/Tek/Ccdc39/Ntn1/Ptch1/Sema5a/Mtss1/Rdh10/Plxnd1/Spry2/Spry1/Rgma/Cxcl10/Pthlh/Tbx2/Hoxb7/Ednra/Etv5/Hmga2/Ctns/Klhl3/Pdgfra/Ahr/Mmrn2/E…
GO:0001885	endothelial cell development	65	-0.650939	-1.80985	0.000322914	0.000322914	0.00431459	839	tags=23%, list=5%, signal=22%	Plcb1/Dmd/Ednra/Pde2a/Il1b/Rapgef3/Col18a1/Cldn1/Ednrb/Pecam1/Ppp1r16b/F11r/Sox18/Cdh5/Cldn5
GO:0090132	epithelium migration	300	-0.48264	-1.53566	0.000331615	0.000331615	0.00441865	2009	tags=26%, list=11%, signal=24%	Pxn/Stc1/Egf/Adora2b/Arsb/Efna1/Met/Rin2/Vegfc/Notch1/Nr2f2/Amot/Ptp4a3/Cxcl12/Bmp4/Amotl1/Itga3/Grn/Irs1/Patz1/Pkn1/Atp2b4/Sash1/Pik3r2/Plcg2/Stat5a/Ptprg/Tgfbr3/Smoc2/Gab2/Epha2/Cln3/Snai2/Alox12/Jup/Fap/Vstm4/Wnt5a/Tek/Scarb1/Sema5a/Plxnd1/Gadd45a/Dcn/Glul/Sp100/Meox2/Clec14a/Gpld1/Itgb2/Prox1/Plpp3/Coro1a/Mmrn2/Lpxn/Fgf10/Angpt2/Card10/Mmp9/Cxcr4/Fgf16/Col18a1/Fgf1/Nos3/Pkn3/Kitl/Gata2/Flt4/K…
GO:1901342	regulation of vasculature development	279	-0.489901	-1.55269	0.000335831	0.000335831	0.00445975	2062	tags=28%, list=12%, signal=25%	Foxj2/Reck/Shc1/Pxn/Efna1/Ptn/Vegfc/Amot/Cxcl12/Ago1/Grn/Foxc1/Agtr1a/Atp2b4/Sash1/Emilin2/Cysltr1/Pml/Smoc2/Epha2/Col4a2/Sh2b3/Jup/Dll1/Flcn/C3ar1/Wnt5a/Tek/Sema6a/Tspan12/Tlr3/Sema5a/Plxnd1/Cd34/Tcf4/Gadd45a/Stab1/Dcn/Spry2/Glul/Ramp2/Cxcl10/Sp100/Hmga2/Pik3r6/Itgb2/Il10/Cx3cr1/Il1b/Rapgef3/C5ar1/Angptl7/Angpt2/Itgax/Mmp9/Cxcr4/Fgf1/Gpr4/Nos3/Ccr2/Prkcb/Cybb/Ccl11/Gata2/Flt1/Ngfr/Aqp1/Hhex/Hhip…
GO:0045765	regulation of angiogenesis	272	-0.490067	-1.55265	0.000336544	0.000336544	0.00445975	2062	tags=28%, list=12%, signal=25%	Foxj2/Reck/Shc1/Pxn/Efna1/Ptn/Vegfc/Amot/Ago1/Grn/Foxc1/Agtr1a/Atp2b4/Sash1/Emilin2/Cysltr1/Pml/Smoc2/Epha2/Col4a2/Sh2b3/Jup/Dll1/Flcn/C3ar1/Wnt5a/Tek/Sema6a/Tspan12/Tlr3/Sema5a/Plxnd1/Cd34/Tcf4/Gadd45a/Stab1/Dcn/Spry2/Glul/Ramp2/Cxcl10/Sp100/Hmga2/Pik3r6/Itgb2/Il10/Cx3cr1/Il1b/Rapgef3/C5ar1/Angpt2/Itgax/Mmp9/Cxcr4/Fgf1/Gpr4/Nos3/Ccr2/Prkcb/Cybb/Ccl11/Gata2/Flt1/Ngfr/Aqp1/Hhex/Hhip/Ppp1r16b/Igf2/…
GO:0043392	negative regulation of DNA binding	48	-0.698322	-1.86225	0.000339113	0.000339113	0.00448152	1365	tags=27%, list=8%, signal=25%	Tfap4/Nfib/Mndal/Sp100/Hmga2/Ifi203/Ifi207/Ifi208/Ifi206/Lef1/Ifi213/Ifi209/Gzma
GO:0097202	activation of cysteine-type endopeptidase activity	22	-0.796326	-1.81991	0.000347447	0.000347447	0.0045617	1178	tags=41%, list=7%, signal=38%	Ifi204/Cyfip2/Mndal/Ifi203/Ifi207/Ifi208/Ifi206/Ifi213/Ifi209
GO:0019471	4-hydroxyproline metabolic process	10	0.889423	1.9749	0.000347663	0.000347663	0.0045617	1084	tags=70%, list=6%, signal=66%	Egln3/P4ha2/Egln1/P4ha1/P4hb/P4ha3/Prdx4
GO:0007156	homophilic cell adhesion via plasma membrane adhesion molecules	76	-0.624084	-1.75248	0.000348009	0.000348009	0.0045617	1047	tags=16%, list=6%, signal=15%	Robo2/Prtg/Hmcn1/Cadm1/Hmcn2/Pcdh12/Pcdh1/Cdh13/Pecam1/Ceacam1/Cdh5/Esam
GO:0002279	mast cell activation involved in immune response	44	-0.702654	-1.83243	0.00036405	0.00036405	0.00475906	2445	tags=45%, list=14%, signal=39%	Chga/Rasgrp1/Fgr/Adora2b/Lyn/Cplx2/Gab2/Lat2/Ptpn6/Syk/Stxbp2/Enpp3/Fcer1g/Lilrb4a/Rac2/Nppc/Cd84/Cd300a/Gata2/Kit
GO:0101023	vascular endothelial cell proliferation	28	-0.758198	-1.83475	0.000370296	0.000370296	0.00482766	816	tags=25%, list=5%, signal=24%	Enpep/Col18a1/Itga4/Flt1/Nrarp/Igf2/Dlk1
GO:0009261	ribonucleotide catabolic process	133	0.438192	1.63357	0.000378234	0.000378234	0.0049179	766	tags=20%, list=4%, signal=20%	Aldoc/Eno1/Pgk1/Eno1b/Pfkl/Slc2a6/Tpi1/Pgam1/Pkm/Gapdh/Gale/Aldoa/Gck/Galk1/Htr2a/Cda/Ier3/Eif6/Nt5c/Gpi1/Acot7/Nudt19/Adpgk/Enpp1/Hif1a/Ada/Ddit4
GO:0045824	negative regulation of innate immune response	95	-0.60187	-1.73187	0.000379656	0.000379656	0.00492316	2270	tags=35%, list=13%, signal=30%	H2-D1/Clec2d/Trafd1/Isg15/Arrb2/Serping1/Ifi204/Grn/Tap1/Nmi/Dhx58/Trim21/Mndal/Oas1a/Stat2/Oas1g/Parp14/H2-Q6/Oas1c/H2-T23/Nlrc5/Dtx4/Ifi203/H2-Q4/Ifi207/Ifi208/Ifi206/Oas3/Ifi213/Klrd1/Igf2/Ifi209/Ceacam1
GO:0045621	positive regulation of lymphocyte differentiation	128	-0.56036	-1.67616	0.000386255	0.000386255	0.00499534	2629	tags=34%, list=15%, signal=29%	Mmp14/Malt1/Stat5b/Ccr7/Rasgrp1/Zmiz1/Vnn1/Gli3/Axl/Il7r/Smarca2/Itpkb/Atp11c/Stat5a/Vsir/Irf1/H2-DMa/Hlx/Nlrp3/Flt3l/Sox13/Socs1/Syk/Tnfsf9/Cd46/Pik3r6/Spi1/Il10/Il23a/Il15/Nckap1l/Il2rg/Nfkbid/Inpp5d/Cd74/Lilrb4a/Ptprc/H2-Aa/Ccr2/Sash3/Cd83/Lef1/Gimap5
GO:0022900	electron transport chain	94	0.480096	1.71011	0.000390656	0.000390656	0.00503877	4377	tags=51%, list=25%, signal=39%	Cox7a1/Slc1a3/Cox4i2/Cycs/Fdx2/Mybbp1a/Cox5a/Dnajc15/Park7/Uqcrq/Cox6a1/Sco2/Ndufb8/Ndufa8/Etfb/Cyc1/Ndufb6/Ndufs7/Chchd2/Sdhb/Ndufs3/Ndufs8/Cdk1/Coq9/Ndufs4/Ndufb9/Ndufv1/Mtch2/Sdhd/Uqcrc1/Ndufs6/Bdnf/Cox5b/Sod2/Gpd1/Coq7/Ndufv3/Uqcr11/Ndufv2/Ndufs2/Ndufa12/Immp2l/Ndufa5/Ndufa10/Uqcrc2/Ndufc2/Plec/Cox7b
GO:0034765	regulation of monoatomic ion transmembrane transport	290	-0.483089	-1.53338	0.00039174	0.00039174	0.00503932	1808	tags=20%, list=10%, signal=19%	Ubash3b/Fxyd3/Bmp4/Scn2b/Agtr1a/Atp2b4/Akap7/Atp1b1/Plcg2/Wnk4/Pml/Ank2/Plcb1/Dmd/Zfas1/Kcnj2/Fhl1/Gjc2/Cav1/P2rx7/Ptpn6/Kcnh2/Trem2/Cxcl9/Klhl24/Ctss/Agrn/Cxcl10/Mrln/Ednra/Rem1/Nr3c2/Plp1/Ahr/Coro1a/Rapgef3/Kcnj13/Mmp9/Shank3/Atp1b2/Chp2/Adcyap1r1/Chd7/Abcb1a/Clec4b1/Abcc9/Reln/Casq2/Atp1a2/Trpc3/Edn3/Tesc/Kcnj8/Kcnc2/Pln/Tspan13/Aplnr/Lrrc55/Gimap5
GO:0010543	regulation of platelet activation	44	-0.700931	-1.82794	0.000395165	0.000395165	0.00506989	1904	tags=39%, list=11%, signal=35%	Lyn/Ubash3b/Pear1/Emilin2/Alox12/Sh2b3/Tlr4/Syk/Cd9/Fcer1g/Tec/Pdgfra/Plek/Selp/F11r/Pdgfb/Ceacam1
GO:0007169	transmembrane receptor protein tyrosine kinase signaling pathway	566	-0.431252	-1.39804	0.000398957	0.000398957	0.005105	2143	tags=21%, list=12%, signal=19%	Ddr2/Stap1/Tyk2/Cpne3/Sgpl1/Insr/C2cd5/Angptl1/Ephb4/Shc1/Axl/Tspan9/Pxn/Neu3/Egf/Prlr/Npr2/Pdk4/Lyn/Efna1/Met/Vegfc/Notch1/Ubash3b/Ptp4a3/Itga1/Bmp4/Irs1/Foxc1/Pdk2/Pik3r2/Pid1/Myoc/Stat5a/Mzb1/Dok4/Ghr/Tns2/Col4a1/Smoc2/Plcb1/Gfra1/Epha2/Adamts12/Col4a2/Sh2b3/Gigyf1/Dll1/Bmp5/Wnt5a/Dok2/Cyfip2/Tek/Sema6a/Tmem204/Tcf7l2/Igfbp6/Ror1/Tcf4/Chn1/Dcn/Socs1/Syk/Spry2/Spry1/Csf1r/Tbx2/Efnb3/Cspg4/Clec1…
GO:0070588	calcium ion transmembrane transport	263	-0.487853	-1.54265	0.000402054	0.000402054	0.00511228	1904	tags=22%, list=11%, signal=20%	Lyn/Cacna2d2/Ubash3b/Adra1a/Bmp4/Mcoln1/Xcl1/P2rx6/P2ry12/Agtr1a/Atp2b4/Atp1b1/Plcg2/Pml/Ank2/Itpr3/Tpcn1/Plcb1/Dmd/Zfas1/Cacng7/Gjc2/Cav1/P2rx7/Mcoln2/Ptpn6/Cxcl9/Cxcl10/Mrln/Ednra/Slc24a5/Rem1/Slc8b1/Plp1/Ahr/Coro1a/Atp2a1/Cacna1h/Rapgef3/Tmem37/Ptprc/Ccr5/Grin2b/Adcyap1r1/Chd7/Trpm5/Clec4b1/Atp2a3/Ednrb/Casq2/Atp1a2/Trpc3/Kcnj8/Pln/Tspan13/Aplnr/Gimap5
GO:0001794	type IIa hypersensitivity	17	-0.825982	-1.81359	0.000402696	0.000402696	0.00511228	2396	tags=59%, list=13%, signal=51%	H2-Q7/H2-D1/Fcgr3/H2-Q6/Fcer1g/H2-T23/H2-Q4/Fcgr2b/Fcgr1/Fcgr4
GO:0002445	type II hypersensitivity	17	-0.825982	-1.81359	0.000402696	0.000402696	0.00511228	2396	tags=59%, list=13%, signal=51%	H2-Q7/H2-D1/Fcgr3/H2-Q6/Fcer1g/H2-T23/H2-Q4/Fcgr2b/Fcgr1/Fcgr4
GO:0002698	negative regulation of immune effector process	125	-0.568364	-1.695	0.000403882	0.000403882	0.00511391	2270	tags=33%, list=13%, signal=29%	H2-D1/Clec2d/Cr2/Hfe/Axl/Arrb2/Serping1/Il7r/Acp5/Grn/Tap1/Il33/Vsir/Masp1/Irf1/Cd55/Hlx/Ptpn6/Cd46/Enpp3/H2-Q6/H2-T23/Spi1/Il10/Cx3cr1/Ahr/Nckap1l/Fgl2/H2-Q4/Lilrb4a/Pglyrp1/Cd22/Ptprc/Fcgr2b/Nod2/Cd84/Ccr2/Cd300a/Klrd1/Igf2/Ceacam1
GO:0019320	hexose catabolic process	37	0.65947	2.02455	0.000405841	0.000405841	0.0051253	485	tags=35%, list=3%, signal=34%	Eno1/Pgk1/Eno1b/Pfkl/Tpi1/Ldha/Pkm/Gapdh/Gale/Aldoa/Gck/Galk1/Gpi1
GO:0019886	antigen processing and presentation of exogenous peptide antigen via MHC class II	20	-0.819094	-1.84644	0.00040865	0.00040865	0.00514733	1975	tags=65%, list=11%, signal=58%	B2m/Unc93b1/H2-DMb1/H2-DMa/Ctss/H2-Ab1/Fcer1g/Ifi30/Cd74/H2-Eb1/Fcgr2b/H2-Aa/H2-DMb2
GO:0019058	viral life cycle	213	-0.511166	-1.59749	0.000412659	0.000412659	0.00518433	2490	tags=28%, list=14%, signal=25%	Nrp1/Adarb1/Inpp5k/Zfp809/Shfl/Prkn/Isg15/Insr/Trim5/Axl/Rab43/Oasl1/Gsn/Ifi204/Ifitm6/Notch1/Agtr1a/Trim6/Apobec3/Trim25/Ctsb/Zc3hav1/Znfx1/Trim12c/Tpcn1/Zfyve1/Ciita/Ly6e/Trim30d/Trim12a/Trim21/Cav1/Fbxl2/Ifih1/Mndal/Pde12/Oas1a/Oas1g/Hmga2/Trim30a/Ccl8/Oas1c/Rnasel/Oasl2/Prox1/Trim34a/Ifi203/Cd74/Cav2/Ifitm1/Ch25h/Ifi207/Oas2/Rsad2/Ifi208/Ifi206/Oas3/Ifi213/Nr5a2/Ifi209
GO:0032623	interleukin-2 production	67	-0.640649	-1.78901	0.00042601	0.00042601	0.00533819	2574	tags=36%, list=14%, signal=31%	Malt1/Stat5b/Prkcq/Pde4b/Hdac7/Cd247/Lag3/Plcg2/Stat5a/Zfp36/Cd34/Defb25/Fcer1g/Laptm5/Il1b/Card11/Lilrb4a/Slc11a1/Ptprc/Nod2/Ccr2/Sash3/Cd83/Cd28
GO:0170041	non-proteinogenic amino acid metabolic process	63	0.560588	1.89827	0.000447277	0.000447277	0.0055902	1142	tags=35%, list=6%, signal=33%	Egln3/Ddah1/P4ha2/Ass1/Egln1/Slc1a3/P4ha1/Plod2/Odc1/Phgdh/Mthfd1/Pemt/Comt/Plod3/Sardh/P4hb/Oaz1/Park7/P4ha3/Cad/Prdx4/Aldh18a1
GO:0007162	negative regulation of cell adhesion	282	-0.481709	-1.52686	0.000462443	0.000462443	0.00576485	2209	tags=24%, list=12%, signal=21%	C1qtnf1/Gli3/Plxnb1/Zc3h8/Hfe/Lag3/Zfp608/Fbln1/Acp5/Notch1/Cd86/Ubash3b/Twsg1/Cxcl12/Bmp4/Mmp2/Myoc/Vsir/Rnd1/Irf1/Gpnmb/Snai2/Alox12/Arhgap6/Sh2b3/Sema6a/Hlx/Sema5a/Plxnd1/Ptpn6/Socs1/Lrrc32/Cd37/Gcnt2/Cd9/H2-Q6/Tnfrsf21/H2-T23/Sema4d/Laptm5/Spi1/Il10/Cd274/Spry4/Plxnc1/Lpxn/Fgl2/Plxna2/Cd24a/H2-Q4/Nfkbid/Dtx1/Cd74/Jam2/Lilrb4a/Tnfaip8l2/Angpt2/Ptprc/Apod/H2-Aa/Cd300a/Erbb3/Ripor2/Cdh13/Nrarp/P…
GO:0001938	positive regulation of endothelial cell proliferation	92	-0.58353	-1.67118	0.000466323	0.000466323	0.00579195	1978	tags=29%, list=11%, signal=26%	Egf/Adora2b/Vegfc/Cxcl12/Bmp4/Agtr1a/Stat5a/Wnt5a/Cav1/Sema5a/Il10/Prox1/Fgf10/Cav2/Col18a1/Itga4/Ccl11/Egfl7/Gata2/Flt4/Cdh13/Ppp1r16b/Nrarp/Igf2/Kdr/Pdgfb/Aplnr
GO:0032693	negative regulation of interleukin-10 production	16	-0.846065	-1.83509	0.000467011	0.000467011	0.00579195	1810	tags=62%, list=10%, signal=56%	Trib2/Vsir/Dll1/Tyrobp/Tnfrsf21/Il23a/Cd274/Lilrb4a/Fcgr2b/Cd84
GO:0002064	epithelial cell development	195	-0.518629	-1.60821	0.000471104	0.000471104	0.00582776	1994	tags=22%, list=11%, signal=20%	Sipa1l3/Stc1/Met/Gja1/Frmd6/Notch1/Bmp4/Psap/Plcb1/Dmd/Epha2/Dll1/Bmp5/Sipa1/Map3k1/Notch2/Wnt5a/Tmod1/Rarb/Ednra/Epas1/Pde2a/Klf5/Prox1/Il1b/Esr1/Rapgef3/Prdm1/Cxcr4/Col18a1/Gpr4/Ccdc88c/Cldn1/Ednrb/Gata2/Pecam1/Ppp1r16b/F11r/Sox18/Kdr/Pdgfb/Cdh5/Cldn5
GO:0032733	positive regulation of interleukin-10 production	36	-0.728669	-1.84626	0.000474215	0.000474215	0.00585128	2166	tags=47%, list=12%, signal=42%	Isg15/Bcl3/Tlr2/Plcg2/Tlr4/Rbm47/Trem2/Syk/Tslp/Cd46/Fcer1g/Il23a/Cd274/Nod2/Sash3/Cd83/Cd28
GO:0036230	granulocyte activation	39	-0.715815	-1.83488	0.000486008	0.000486008	0.00597004	1114	tags=33%, list=6%, signal=31%	Traf3ip2/Syk/Enpp3/Tyrobp/Fcer1g/Spi1/Itgb2/Il15/Il16/Ccr2/Ptafr/Cd300a/Fcgr4
GO:0046034	ATP metabolic process	186	0.393109	1.55657	0.000486308	0.000486308	0.00597004	3755	tags=41%, list=21%, signal=33%	Aldoc/Eno1/Pgk1/Eno1b/Pfkl/Slc2a6/Tpi1/Pgam1/Pkm/Ak4/Gapdh/Gale/Aldoa/Gck/Galk1/Htr2a/Ier3/Eif6/Gpi1/Adpgk/Ak1/Enpp1/Hif1a/Ddit4/Slc25a25/Ndufab1/Pfkp/Tspo/Atpsckmt/Arl2/Nudt2/Foxk2/Vcp/Ndufb8/Ndufa8/Ndufb10/Ndufb6/Map2k1/Ola1/Hk1/Ndufs7/Sdhb/Nudt5/Hspa8/Ndufs3/Ndufs8/Ndufa11/Ndufs5/Ndufs4/Parp1/Ndufb9/Ndufb7/Ndufv1/Mtch2/Sdhd/Ndufb11/Prkag2/Fis1/Ppp2ca/Ndufs6/Ndufb2/Stoml2/Nupr1/Gpd1/Bpgm/Ndufa1…
GO:0046166	glyceraldehyde-3-phosphate biosynthetic process	12	0.859982	1.98541	0.000488418	0.000488418	0.00598076	1122	tags=67%, list=6%, signal=63%	Eno1/Pgk1/Tpi1/Pgam1/Gapdh/Pcx/Mdh2/Tkt
GO:0072523	purine-containing compound catabolic process	140	0.422881	1.57614	0.000499275	0.000499275	0.00609827	766	tags=19%, list=4%, signal=18%	Aldoc/Eno1/Pgk1/Eno1b/Pfkl/Slc2a6/Tpi1/Pgam1/Pkm/Gapdh/Gale/Aldoa/Gck/Galk1/Htr2a/Ier3/Eif6/Nt5c/Gpi1/Acot7/Nudt19/Adpgk/Enpp1/Hif1a/Ada/Ddit4
GO:0170034	L-amino acid biosynthetic process	41	0.627793	1.97228	0.000504792	0.000504792	0.00615013	1627	tags=44%, list=9%, signal=40%	Ass1/Asns/Plod2/Phgdh/Shmt2/Mthfd1/Psph/Plod3/Mtap/Psat1/Mri1/Park7/Dhfr/Aldh18a1/Pycr2/Got1/Aasdhppt/Pycr1
GO:0002709	regulation of T cell mediated immunity	84	-0.614934	-1.75702	0.000512117	0.000512117	0.00622369	2692	tags=37%, list=15%, signal=31%	Tap2/Mr1/Malt1/H2-Q7/H2-D1/Hfe/B2m/Il7r/Xcl1/Dennd1b/Vsir/Cd55/P2rx7/Nlrp3/H2-Q6/H2-T23/Il23a/Ahr/H2-T24/Il1b/Nckap1l/Cd24a/H2-Q4/Mill2/Lilrb4a/Ptprc/Nod2/Rsad2/Ccr2/Sash3/Klrd1
GO:0022904	respiratory electron transport chain	85	0.505227	1.74573	0.000513542	0.000513542	0.00622536	4377	tags=55%, list=25%, signal=42%	Cox7a1/Slc1a3/Cox4i2/Cycs/Mybbp1a/Cox5a/Dnajc15/Park7/Uqcrq/Cox6a1/Sco2/Ndufb8/Ndufa8/Etfb/Cyc1/Ndufb6/Ndufs7/Chchd2/Sdhb/Ndufs3/Ndufs8/Cdk1/Coq9/Ndufs4/Ndufb9/Ndufv1/Mtch2/Sdhd/Uqcrc1/Ndufs6/Bdnf/Cox5b/Sod2/Gpd1/Coq7/Ndufv3/Uqcr11/Ndufv2/Ndufs2/Ndufa12/Immp2l/Ndufa5/Ndufa10/Uqcrc2/Ndufc2/Plec/Cox7b
GO:0005996	monosaccharide metabolic process	235	0.379431	1.54051	0.00052409	0.00052409	0.0063276	1656	tags=20%, list=9%, signal=18%	Adipoq/Aldoc/Eno1/Pgk1/Eno1b/Fabp5/Pfkl/Tpi1/Pgam1/Ldha/Pkm/Erfe/Rbp4/Gapdh/Gale/Aldoa/Pdk1/Gck/Dgat2/Pgp/Galk1/C1qtnf3/Pgm1/Serp1/Gpi1/G6pc3/Sesn2/Slc39a14/Adpgk/Pcx/Pdk3/Hif1a/Mdh2/Fuom/Nnmt/Pfkp/Fbn1/Supt20/Got1/Pgd/Ddb1/Uxs1/Serpina12/Atf4/Slc25a11/Foxk2
GO:0010001	glial cell differentiation	249	-0.482313	-1.52318	0.000524592	0.000524592	0.0063276	2223	tags=24%, list=12%, signal=21%	Abca2/Gli3/Wasf3/Adam22/Tppp/Tlr2/Ptn/Notch1/Cntnap1/Cnp/Bmp4/Sox11/Grn/Il33/Myoc/Il34/Gpr157/Dmd/Tlr4/Dll1/Hdac11/Notch2/Prdm8/Nfib/Vtn/Lgi4/Tspan2/Tcf7l2/Ror1/Sox13/Trem2/C1qa/Csf1r/Gpm6b/Nfia/Hmga2/Clu/Ntrk2/Tnfrsf21/Plp1/Casz1/Plpp3/Il1b/Fgf10/Dtx1/C5ar1/Cxcr4/Klf15/Ntf3/Ncmap/Tenm4/Reln/Erbb3/Aspa/Sh3tc2/Lef1/Nrros/Ano1/Pdgfb
GO:0060907	positive regulation of macrophage cytokine production	28	-0.750034	-1.815	0.000527586	0.000527586	0.00634788	1947	tags=50%, list=11%, signal=45%	Tlr2/Plcg2/Gprc5b/Tlr4/Wnt5a/Casp4/Tlr3/P2rx7/Laptm5/Cd74/Nod2/Tlr7/Spon2/Cd36
GO:0140694	non-membrane-bounded organelle assembly	384	0.320677	1.37599	0.000541826	0.000541826	0.00649991	3241	tags=28%, list=18%, signal=23%	Csf2/Cavin4/Sqle/Myl9/Fhod3/Tpm1/Haus7/Csrp2/Bop1/Actg1/Plk2/Mrto4/Eif6/Cav3/Csrp1/Jmjd6/Dhx29/Sac3d1/Rrp7a/Prkd1/Eif2s1/Mrps7/Wnk3/Ppan/Mrpl20/Stil/Farp2/Nop2/Dbnl/C1qbp/Haus8/Nle1/Lsm4/Flna/Cenpx/Mdn1/Rangrf/G3bp1/Diaph3/Brix1/Nip7/Rcc1/Lsm3/Chek2/Rrs1/Kpnb1/Rpsa/Rpf2/Cenph/Mpv17l2/Myh10/Ddb1/Wdr1/Plk4/Noa1/Cdk5rap2/Npm1/Spag5/Poldip2/Rplp0/Rbm14/Birc5/Itgb1/Mybl2/Tubb5/Hnrnpu/Caprin1/Rps3/Tpr/…
GO:0032102	negative regulation of response to external stimulus	361	-0.460967	-1.48236	0.000542909	0.000542909	0.00649991	1873	tags=22%, list=10%, signal=20%	Ifi204/Acp5/Notch1/Ubash3b/Padi2/Grn/Tap1/Smad3/Nmi/Il33/Dhx58/Nbl1/Zfp36/Sema3f/Cd200/Alox12/Sh2b3/Igtp/Wnt5a/Trim21/Sema6a/Rtn4rl1/Vtn/Mndal/Sema5a/Nlrp3/Robo2/Ptpn6/Trem2/Sema6b/Oas1a/St6gal1/Irgm2/Stat2/Rgma/Irgm1/Oas1g/Enpp3/Socs3/Sema6d/Parp14/Aoah/Cd9/H2-Q6/Oas1c/H2-T23/Sema4d/Sema3g/Il10/Pdgfra/Nlrc5/Dtx4/Cx3cr1/Fignl2/Ahr/Ifi203/Fgl2/Cd24a/H2-Q4/Tnfaip8l2/Angpt2/Pglyrp1/Wfdc1/Fcgr2b/Nod2…
GO:0098761	cellular response to interleukin-7	16	0.782576	1.96116	0.00054603	0.00054603	0.00652114	1485	tags=50%, list=8%, signal=46%	Eno1/Hspd1/Ybx1/Pdia3/Rad23b/Stip1/P4hb/Atic
GO:0030168	platelet activation	84	-0.613897	-1.75406	0.000551295	0.000551295	0.0065678	2561	tags=38%, list=14%, signal=33%	Pip5k1c/Prkcq/Mertk/C1qtnf1/Gnas/Axl/Tspan9/Lyn/Ubash3b/P2ry12/Pear1/Emilin2/Alox12/Sh2b3/Tlr4/Ptpn6/Fermt3/Syk/Entpd2/Cd9/Fcer1g/Tec/Pdgfra/Plek/Selp/Cfh/Entpd1/P2ry1/F11r/Pdgfb/Ceacam1/Vwf
GO:0016052	carbohydrate catabolic process	141	0.426051	1.59462	0.000569227	0.000569227	0.00676476	766	tags=18%, list=4%, signal=17%	Aldoc/Eno1/Pgk1/Eno1b/Pfkl/Slc2a6/Tpi1/Pgam1/Ldha/Pkm/Gapdh/Gale/Aldoa/Gck/Galk1/Htr2a/Ier3/Pgm1/Stbd1/Eif6/Gpi1/Adpgk/Enpp1/Hif1a/Ddit4
GO:0051276	chromosome organization	516	0.30348	1.31169	0.000571219	0.000571219	0.0067718	4932	tags=41%, list=28%, signal=31%	Anapc15/Dtd1/Ran/Nhp2/Nat10/Hsp90aa1/Cct3/Nek6/Gar1/Ruvbl2/Cct7/Nasp/Spc24/Syce2/Pinx1/Bub1/Flna/Brip1/Cenpx/Gins2/Mcm5/Lmna/Rangrf/Cct6a/Ccne1/Nsl1/Tcp1/Fen1/Xrcc6/Chek2/Phf10/Mcm8/Rrs1/Tubg1/Naa50/Kpnb1/Cct2/Gnl3/Ccne2/Cenph/Smarca4/Mcm3/Cdc16/Naa10/Cdca5/Cdk5rap2/Spag5/Rae1/Poldip2/Apex1/Anapc4/Dkc1/Hspa2/Birc5/Cct8/Syde1/Mybl2/Ddx1/Hnrnpu/Cct5/Smarca5/Bcl7c/Nop10/Ercc1/Tpr/Phb2/Anxa1/Mcm6/Tri…
GO:0006734	NADH metabolic process	37	0.652077	2.00185	0.000579205	0.000579205	0.00682798	1669	tags=41%, list=9%, signal=37%	Eno1/Pgk1/Eno1b/Pfkl/Tpi1/Pkm/Gapdh/Aldoa/Gpi1/Pcx/Me1/Mdh2/Pfkp/Foxk2/Vcp
GO:0098581	detection of external biotic stimulus	28	-0.748157	-1.81045	0.000580016	0.000580016	0.00682798	2396	tags=54%, list=13%, signal=46%	H2-Q7/H2-D1/Tlr2/Tlr4/Casp4/Scarb1/Trem2/Ly96/H2-Q6/Clec4n/H2-Q4/Tlr1/Pglyrp1/Naip2/Nod2
GO:0072006	nephron development	137	-0.540585	-1.63264	0.000580193	0.000580193	0.00682798	1845	tags=30%, list=10%, signal=27%	Notch1/Bmp4/Itga3/Foxc1/Lgr4/Agtr1a/Foxd1/Wnk4/Dll1/Notch2/Nid1/Gpc3/C3ar1/Col4a4/Tek/Ptch1/Mtss1/Hoxb7/Ednra/Enpep/Ctns/Notch3/Klhl3/Dchs2/Pdgfra/Ahr/Ptpro/Cd24a/Wnt6/Cfh/Angpt2/Klf15/Fgf1/Gpr4/Ednrb/Bmp7/Aqp1/Lama5/Eya1/Pdgfb/Agtr2
GO:0098813	nuclear chromosome segregation	283	0.33911	1.40063	0.00058563	0.00058563	0.00687525	4959	tags=41%, list=28%, signal=30%	Anapc15/Ran/Nek6/Spc24/Syce2/Pinx1/Bub1/Flna/Brip1/Rangrf/Ccne1/Nsl1/Chek2/Phf10/Rrs1/Tubg1/Kpnb1/Ccne2/Smarca4/Ddb1/Cdc16/Cdca5/Fam83d/Cdk5rap2/Spag5/Poldip2/Anapc4/Actr3/Birc5/Syde1/Mybl2/Hnrnpu/M1ap/Smarca5/Bcl7c/Tpr/Trip13/Zwilch/Smarcb1/Tpx2/Nudc/Spdl1/Smarcc1/Rcc2/Cdk1/Mapre1/Rmi2/Bccip/Kif4/Ube2c/Sirt1/Smc2/Chmp6/Zwint/Ino80/Spc25/Psmc3ip/Pmf1/Smc3/Nup62/Rab11a/Snhg15/Actb/Dcaf13/Kif2a/Tex…
GO:1901016	regulation of potassium ion transmembrane transporter activity	38	-0.711004	-1.81559	0.000594837	0.000594837	0.00696643	1633	tags=34%, list=9%, signal=31%	Akap7/Atp1b1/Ank2/Fhl1/Cav1/Trem2/Klhl24/Agrn/Nr3c2/Atp1b2/Abcc9/Casq2/Lrrc55
GO:0098771	inorganic ion homeostasis	447	-0.442367	-1.43397	0.000600345	0.000600345	0.00701395	2151	tags=20%, list=12%, signal=18%	Cyb561/Cp/Hexb/Ank1/Hfe/Stc1/B2m/Tgm2/Lyn/Mllt6/Ubash3b/Mcoln1/Xcl1/Cnnm3/Atp2b4/Atp1b1/Plcg2/Wnk4/Pml/Ank2/Itpr3/Cnnm1/Plcb1/Dmd/Grina/Cln3/Efhc1/Steap4/Wnt5a/Dmpk/Tmem64/Slc12a6/Cav1/P2rx7/Mtss1/Ptpn6/Steap3/Kcnh2/Cxcl9/Cxcl10/Pthlh/Ednra/Slc24a5/Enpp3/Tmtc2/Epas1/Klhl3/Ccl8/Fgfr4/Nr3c2/Slc8b1/Sfrp4/Scara5/Kcna1/Slc25a27/Npy1r/Coro1a/Atp2a1/Tmc8/Cav2/Inpp4b/Slc11a1/Atp1b2/Ptprc/Ccr5/Grin2b/Tbxa…
GO:0009166	nucleotide catabolic process	151	0.413086	1.56102	0.000608404	0.000608404	0.00709097	1079	tags=21%, list=6%, signal=20%	Aldoc/Eno1/Pgk1/Eno1b/Pfkl/Slc2a6/Tpi1/Pgam1/Pkm/Gapdh/Gale/Aldoa/Gck/Galk1/Htr2a/Cda/Ier3/Eif6/Nt5c/Gpi1/Acot7/Nudt19/Dctpp1/Adpgk/Enpp1/Hif1a/Ada/Ddit4/Dut/Dera/Nudt18/Pfkp
GO:1905562	regulation of vascular endothelial cell proliferation	27	-0.772492	-1.85643	0.000630421	0.000630421	0.00732993	381	tags=22%, list=2%, signal=22%	Col18a1/Itga4/Flt1/Nrarp/Igf2/Dlk1
GO:0046496	nicotinamide nucleotide metabolic process	158	0.409558	1.55566	0.000641341	0.000641341	0.007439	843	tags=18%, list=5%, signal=18%	Aldoc/Eno1/Pgk1/Eno1b/Pfkl/Slc2a6/Tpi1/Pgam1/Ldha/Pkm/Gapdh/Gale/Aldoa/Gck/Galk1/Htr2a/Prdx5/Ier3/Aldh1l2/Eif6/Gpi1/Adpgk/Pcx/Me1/Enpp1/Hif1a/Ddit4/Txnrd1/Mdh2
GO:0043270	positive regulation of monoatomic ion transport	192	-0.517863	-1.60169	0.000649824	0.000649824	0.00751937	1829	tags=22%, list=10%, signal=20%	Mllt6/Cxcl12/Bmp4/Hbp1/P2ry12/Agtr1a/Akap7/Atp1b1/Plcg2/Wnk4/Ank2/Plcb1/Dmd/Kcnj2/Fhl1/Gjc2/Cav1/P2rx7/Kcnh2/Trem2/Cxcl9/Ctss/Cxcl10/Ednra/Plp1/Rapgef3/Shank3/Cxcr4/Atp1b2/Chp2/Adcyap1r1/Abcb1a/Clec4b1/Reln/Trpc3/Edn3/Tesc/Kcnc2/P2ry1/Pdgfb/Aplnr/Lrrc55/Gimap5
GO:0030856	regulation of epithelial cell differentiation	135	-0.540171	-1.62787	0.000654862	0.000654862	0.00755958	2107	tags=27%, list=12%, signal=24%	Ncoa3/Foxj2/Prlr/Zeb1/Notch1/Bmp4/Foxc1/Spred2/Zfp36l1/Stat5a/Plcb1/Zfp36/Dll1/Tmem100/Cav1/Ptch1/Spry2/Spry1/Csf1r/Prkch/Sfrp4/Ccnd1/Il1b/Apold1/Xdh/Cd24a/Fgf10/Mmp9/Cdkn1c/Ptch2/Bmp7/Lef1/F11r/Ceacam1/Cdh5/Cldn5
GO:0030490	maturation of SSU-rRNA	47	0.596983	1.89793	0.000668868	0.000668868	0.0076943	4746	tags=64%, list=27%, signal=47%	Bysl/Nat10/Wdr46/Rcl1/Lsm6/Tsr1/Rrs1/Tbl3/Heatr1/Nop14/Tsr3/Wdr43/Utp3/Riok3/Nol10/Rpp40/Gtf2h5/Dcaf13/Dhx37/Fcf1/Rps19/Abt1/Utp6/Tsr2/Rps16/Ngdn/Nol11/Pwp2/Ercc2/Riok1
GO:1904064	positive regulation of cation transmembrane transport	127	-0.561302	-1.68074	0.000669933	0.000669933	0.0076943	1772	tags=25%, list=10%, signal=23%	Bmp4/Agtr1a/Akap7/Atp1b1/Plcg2/Wnk4/Ank2/Plcb1/Dmd/Kcnj2/Gjc2/Cav1/P2rx7/Kcnh2/Trem2/Cxcl9/Ctss/Cxcl10/Ednra/Plp1/Rapgef3/Atp1b2/Chp2/Adcyap1r1/Clec4b1/Trpc3/Edn3/Tesc/Kcnc2/Aplnr/Lrrc55/Gimap5
GO:0045747	positive regulation of Notch signaling pathway	38	-0.7085	-1.80919	0.000671305	0.000671305	0.0076943	1285	tags=32%, list=7%, signal=29%	Reck/Notch1/Dll1/Robo2/Enho/Fgf10/Nod2/Jag2/Kit/Eya1/Dll4/Mfng
GO:0007389	pattern specification process	377	-0.44826	-1.44402	0.00068033	0.00068033	0.00776322	2992	tags=25%, list=17%, signal=22%	Hoxc6/Frs2/Nrp2/Ep300/Med12/Hoxd4/Hoxa7/Ttc21b/Pbx1/Abi1/Tshz1/Tbx5/Dync2h1/Mef2c/Cc2d2a/Mafb/Nrp1/Hoxc4/Gpr161/Osr1/Ttc8/Bicc1/Vangl2/Ift122/Gli3/Hoxa9/C2cd3/Enkur/Aldh1a2/Stc1/Meis1/Tmem67/Zeb1/Gja1/Notch1/Tbc1d32/Nr2f2/Hoxd8/Bmp4/Ccdc40/Wdr19/Smad3/Dop1b/Foxc1/Ttn/Hoxd9/Foxd1/Hoxb6/Lrp4/Tctn1/Cfap45/Gli2/Nbl1/Sema3f/Dll1/Bmp5/Syngap1/Hoxa3/Notch2/Gpc3/Ripply3/Wnt5a/Ccdc39/Ptch1/Robo2/Gas1/C1qa…
GO:0032649	regulation of type II interferon production	108	-0.575483	-1.69305	0.000680527	0.000680527	0.00776322	2486	tags=33%, list=14%, signal=29%	Ccr7/Pde4b/H2-Q7/Rasgrp1/H2-D1/Isg15/Tyk2/Ticam2/Axl/Bcl3/Klrk1/Il33/Vsir/Tlr4/Wnt5a/Tlr3/Irgm1/Tnfsf9/H2-Q6/Laptm5/Il10/Il23a/Cd274/Il1b/H2-Q4/Cd14/Lilrb4a/Pglyrp1/Slc11a1/Irf8/Nod2/Cd2/Tlr7/Ccr2/Sash3/Gimap5
GO:0046365	monosaccharide catabolic process	39	0.63277	1.95824	0.000683258	0.000683258	0.00777602	485	tags=33%, list=3%, signal=32%	Eno1/Pgk1/Eno1b/Pfkl/Tpi1/Ldha/Pkm/Gapdh/Gale/Aldoa/Gck/Galk1/Gpi1
GO:0000460	maturation of 5.8S rRNA	35	0.644383	1.95374	0.000694523	0.000694523	0.00788567	1980	tags=46%, list=11%, signal=41%	Bop1/Eif6/Ftsj3/Mak16/Exosc4/Rrp15/Exosc8/Rcl1/Rrs1/Mphosph6/Exosc2/Pes1/Npm1/Wdr12/Nol9/Las1l
GO:0032787	monocarboxylic acid metabolic process	518	0.299993	1.30296	0.000700029	0.000700029	0.00792958	1656	tags=17%, list=9%, signal=16%	Adipoq/Slc16a3/Aldoc/Eno1/Mif/Pgk1/Eno1b/Fabp5/Pfkl/Mfsd2a/Slc2a6/Hpgd/Tpi1/Pgam1/Ldha/Pkm/Erfe/Gapdh/Gale/Aldoa/Pdk1/Gck/Fads3/Dgat2/Mthfd1l/Galk1/Slc27a3/Htr2a/Slc1a3/Agt/Insig1/Ptgs2/Ier3/Grhpr/Phgdh/Ptgis/Aldh1l2/Eif6/Stard4/Gpi1/Sesn2/Acot7/Hacd1/Nudt19/Aacs/Nr4a3/Adpgk/Pcx/Me1/Ces2g/Pdk3/Enpp1/Dbi/Ptgr1/Hif1a/Tysnd1/Aldh1a3/Twist1/Nucb2/Ddit4/Comt/Cnr1/Acot4/Hacd2/Ndufab1/Park7/Acot1/Pdzd11…
GO:0032633	interleukin-4 production	44	-0.688692	-1.79603	0.000706681	0.000706681	0.00797711	2847	tags=43%, list=16%, signal=36%	Rara/Txk/Prkcq/H2-Q7/H2-D1/Notch1/Il33/Notch2/Nlrp3/Icosl/Syk/H2-Q6/Fcer1g/H2-T23/H2-Q4/Sash3/Cd83/Cd28/Lef1
GO:0031343	positive regulation of cell killing	62	-0.636392	-1.74689	0.000707523	0.000707523	0.00797711	2692	tags=45%, list=15%, signal=38%	Tap2/Mr1/Stat5b/H2-Q7/Rasgrp1/H2-D1/Stap1/Hfe/B2m/Lag3/Klrk1/Stat5a/P2rx7/Syk/Tyrobp/H2-Q6/H2-T23/Spi1/Il23a/H2-T24/H2-Q4/Mill2/Nos2/Ptprc/Ccr5/Cadm1/Klrd1/Gimap5
GO:0033674	positive regulation of kinase activity	311	-0.46174	-1.47118	0.000709999	0.000709999	0.0079864	2080	tags=23%, list=12%, signal=21%	Insr/Ephb4/Map2k6/Axl/Arrb2/Pxn/Egf/Prlr/Efna1/Met/Vegfc/Cd86/Adra1a/Mmd/Atp2b4/Sash1/Map3k5/Wnk4/Il34/Gprc5b/Epha2/Tlr4/Igtp/Map3k1/Notch2/Wnt5a/Tek/Map3k11/P2rx7/Ror1/Trem2/Socs1/Syk/Csf1r/Irgm2/Agrn/Irgm1/Hmga2/Ntrk2/Fgfr4/Tnfrsf11a/Pik3r6/Ccnd1/Il23a/Pdgfra/Prox1/Fgd4/Il1b/Cd24a/Tlr1/Cd74/Card10/Slc11a1/Ptprc/Fgf1/Ntf3/Fgd2/Rassf2/Kitl/Cd300a/Reln/Erbb3/Flt1/Flt4/Kit/Edn3/Abi3/Kdr/Pdgfb/Ceaca…
GO:0060037	pharyngeal system development	26	-0.75557	-1.79684	0.000713964	0.000713964	0.00801237	2142	tags=42%, list=12%, signal=37%	Ece1/Bmp4/Bmp5/Ripply3/Ptch1/Tbx2/Ednra/Plxna2/Bmp7/Eya1/Adgrf5
GO:0055080	monoatomic cation homeostasis	506	-0.432643	-1.40176	0.000720611	0.000720611	0.00806824	2151	tags=19%, list=12%, signal=17%	Cyb561/Cp/Hexb/Ank1/Hfe/Atp6v0d2/Gm6377/Stc1/B2m/Pdk4/Tgm2/Lyn/Mllt6/Ubash3b/Cln6/Mcoln1/Xcl1/Grn/Cnnm3/Ppt1/Agtr1a/Atp2b4/Pdk2/Atp1b1/Plcg2/Wnk4/Pml/Ank2/Itpr3/Cnnm1/Plcb1/Dmd/Grina/Cln3/Efhc1/Car7/Steap4/Rab20/Wnt5a/Dmpk/Tmem64/Slc12a6/Cav1/P2rx7/Mtss1/Ptpn6/Steap3/Kcnh2/Cxcl9/Cxcl10/Pthlh/Ednra/Slc24a5/Tmtc2/Epas1/Klhl3/Ccl8/Nr3c2/Slc8b1/Scara5/Kcna1/Slc25a27/Npy1r/Coro1a/Atp2a1/Tmc8/Cav2/Inpp…
GO:0050909	sensory perception of taste	20	-0.808814	-1.82327	0.000723059	0.000723059	0.00807696	1451	tags=30%, list=8%, signal=28%	Itpr3/Reep2/Rtp4/Lef1/Rtp3/Cd36
GO:0050679	positive regulation of epithelial cell proliferation	197	-0.518441	-1.6074	0.000739682	0.000739682	0.00824361	1978	tags=24%, list=11%, signal=21%	Egf/Adora2b/Osr2/Ptn/Vegfc/Notch1/Cxcl12/Bmp4/Sox11/Grn/Agtr1a/Stat5a/Gli2/Bmp5/Notch2/Wnt5a/Hlx/Cav1/Sema5a/Tcf7l2/Gas1/Glul/Hmga2/Ccnd1/Il10/Prox1/Esr1/Fgf10/C5ar1/Cav2/Col18a1/Nod2/Fgf1/Itga4/Ccl11/Cldn1/Egfl7/Gata2/Flt4/Eya1/Cdh13/Ppp1r16b/Nrarp/Igf2/Kdr/Pdgfb/Aplnr
GO:0044743	protein transmembrane import into intracellular organelle	36	0.64806	1.97888	0.000773179	0.000773179	0.00859712	2028	tags=36%, list=11%, signal=32%	Tomm40/Hspd1/Grpel1/Timm17a/Timm23/Dnajc15/Timm50/Dnlz/Timm17b/Tomm20/Tomm70a/Pex10/Aifm1
GO:0002437	inflammatory response to antigenic stimulus	63	-0.633734	-1.74656	0.000778869	0.000778869	0.0086258	2486	tags=37%, list=14%, signal=32%	Ccr7/Pla2g2d/H2-Q7/Rasgrp1/H2-D1/Notch1/Cysltr1/Fcgr3/Notch2/Trem2/Cd68/H2-Q6/Fcer1g/H2-T23/Il10/Cd24a/H2-Q4/Lilrb4a/Fcgr2b/Nod2/Fcgr1/Cd28/Fcgr4
GO:0032663	regulation of interleukin-2 production	60	-0.637359	-1.74295	0.000780894	0.000780894	0.0086258	2574	tags=35%, list=14%, signal=30%	Malt1/Stat5b/Prkcq/Pde4b/Hdac7/Lag3/Plcg2/Stat5a/Zfp36/Cd34/Defb25/Laptm5/Il1b/Card11/Lilrb4a/Ptprc/Nod2/Ccr2/Sash3/Cd83/Cd28
GO:0042100	B cell proliferation	83	-0.605365	-1.72272	0.000781109	0.000781109	0.0086258	1959	tags=31%, list=11%, signal=28%	Prlr/Lyn/Il7r/Pkn1/Mzb1/Tlr4/Gpr183/Tyrobp/Cd180/Tnfrsf21/Cd38/Tnfrsf13b/Il10/Ahr/Nckap1l/Cd24a/Card11/Inpp5d/Cd74/Cd22/Ptprc/Fcgr2b/Sash3/Cd300a/Ighm/Lef1
GO:1904062	regulation of monoatomic cation transmembrane transport	268	-0.47922	-1.5166	0.000786808	0.000786808	0.00866895	1808	tags=21%, list=10%, signal=19%	Ubash3b/Fxyd3/Bmp4/Scn2b/Agtr1a/Atp2b4/Akap7/Atp1b1/Plcg2/Wnk4/Pml/Ank2/Plcb1/Dmd/Zfas1/Kcnj2/Fhl1/Gjc2/Cav1/P2rx7/Ptpn6/Kcnh2/Trem2/Cxcl9/Klhl24/Ctss/Agrn/Cxcl10/Mrln/Ednra/Rem1/Nr3c2/Plp1/Ahr/Coro1a/Rapgef3/Mmp9/Atp1b2/Chp2/Adcyap1r1/Chd7/Clec4b1/Abcc9/Casq2/Atp1a2/Trpc3/Edn3/Tesc/Kcnj8/Kcnc2/Pln/Tspan13/Aplnr/Lrrc55/Gimap5
GO:0001569	branching involved in blood vessel morphogenesis	40	-0.685144	-1.759	0.000789262	0.000789262	0.00867621	1450	tags=32%, list=8%, signal=30%	Cxcl12/Col4a1/Tek/Sema5a/Plxnd1/Ednra/Ahr/Cxcr4/Lef1/Flt1/Nrarp/Kdr/Dll4
GO:0170038	proteinogenic amino acid biosynthetic process	40	0.617978	1.922	0.000801737	0.000801737	0.00879337	1627	tags=42%, list=9%, signal=39%	Ass1/Asns/Plod2/Phgdh/Shmt2/Mthfd1/Psph/Plod3/Mtap/Psat1/Mri1/Dhfr/Aldh18a1/Pycr2/Got1/Aasdhppt/Pycr1
GO:0048872	homeostasis of number of cells	352	-0.453681	-1.45715	0.000808109	0.000808109	0.0088432	2556	tags=26%, list=14%, signal=23%	Mafb/Stat5b/Wdr37/Cdk6/Pik3cd/Ccr7/Pde4b/Slc40a1/Xiap/Slc46a2/Dock11/Mertk/Lipa/Armcx1/Isg15/Zc3h8/Ank1/Axl/Tspan9/Sp3/Zbtb18/B2m/Stat4/Foxo3/Lyn/Il7r/Notch1/Nemp1/Chst3/Smarca2/Bmp4/Itpkb/Dock10/Pkn1/Lgr4/Zfp36l1/Aim2/Stat5a/Pmaip1/Hoxb6/Lmo1/Tgfbr3/Plcb1/Zfp36/Tsc22d3/Ypel4/Sh2b3/Ezh1/Traf3ip2/P2rx7/Flt3l/Exoc6/Gprasp2/P2ry14/Csf1r/Bcl2l11/Gpr183/Dnase2a/Epas1/Fcer1g/Pirb/Tnfrsf13b/Crispld1/Spi…
GO:0035739	CD4-positive, alpha-beta T cell proliferation	25	-0.754692	-1.7816	0.000812106	0.000812106	0.00886688	1801	tags=40%, list=10%, signal=36%	Twsg1/Xcl1/Vsir/Cd55/Irgm1/Cd274/Cd24a/Card11/Lilrb4a/Cd28
GO:0006520	amino acid metabolic process	213	0.377478	1.51525	0.000836179	0.000836179	0.00909141	2954	tags=32%, list=17%, signal=27%	Egln3/Ddah1/P4ha2/Ass1/Egln1/Bcat1/Slc1a3/Asns/P4ha1/Plod2/Odc1/Gcat/Phgdh/Gcsh/Shmt2/Mthfd1/Pemt/Psph/Comt/Plod3/Sardh/Mtap/Txnrd1/Farsa/P4hb/Psat1/Oaz1/Mri1/Park7/P4ha3/Cad/Gart/Oat/Prdx4/Dhfr/Aldh18a1/Pycr2/Gfpt2/Tars2/Spr/Got1/Aasdhppt/Aarsd1/Atf4/Fh1/Pycr1/Farsb/Pcmt1/Gmps/Bcat2/Fah/Ears2/Asrgl1/Azin1/Ddc/Slc7a11/Gamt/Yars2/Got2/Kyat3/Abat/Nos1/Gatc/Gls2/Blmh/Azin2/Auh/Carnmt1/Apip
GO:0003013	circulatory system process	466	-0.435874	-1.40984	0.000836429	0.000836429	0.00909141	1948	tags=21%, list=11%, signal=19%	Stc1/Gaa/Slc23a2/Npr2/Adora2b/Pde3a/Met/Gsn/Gja1/Vegfc/Nr2f2/Amot/Ptp4a3/Itga1/Adra1a/Uty/Scn2b/Smad3/Foxc1/Mmp2/Ttn/Agtr1a/Atp2b4/Thrb/Atp1b1/Slc27a1/Cysltr1/Mgll/Wnk4/Tgfbr3/Ank2/Ptgs1/Dmd/Zfas1/Slc22a5/Kcnj2/Jup/Akap12/Dll1/Fli1/Vstm4/C3ar1/Tnni2/Dmpk/Ncf2/Ccl4/Cav1/Actc1/Kcnh2/Agrn/Ramp2/Ednra/Npr1/Enpep/Epas1/Nr3c2/Pde2a/Cd38/Npy1r/Ahr/Camk2n1/Cacna1h/Ptpro/Nos2/Ace/Cxcr4/Hopx/Gucy1a1/Tbxas1…
GO:0032735	positive regulation of interleukin-12 production	37	-0.711826	-1.80838	0.000841047	0.000841047	0.00910841	1947	tags=43%, list=11%, signal=39%	Tlr2/Unc93b1/Plcg2/Irf1/Plcb1/Tlr4/Tlr3/Syk/Tnfsf9/Defb25/Laptm5/Il23a/Il16/Irf8/Nod2/Cd36
GO:0032755	positive regulation of interleukin-6 production	98	-0.572174	-1.65558	0.000843102	0.000843102	0.00910841	1588	tags=30%, list=9%, signal=27%	Unc93b1/Zbtb20/Plcg2/Il33/Tlr4/Wnt5a/Ifih1/Tlr3/P2rx7/Syk/Tslp/Tnfsf9/Defb25/Tyrobp/Fcer1g/Laptm5/Il17d/Il1b/Tlr1/Nos2/Cd74/Lpl/Il16/Ccr5/Nod2/Tlr7/Spon2/Ptafr/Cd36
GO:0002922	positive regulation of humoral immune response	14	-0.851048	-1.78823	0.000843643	0.000843643	0.00910841	1155	tags=43%, list=6%, signal=40%	H2-DMa/Trem2/Il1b/Ptprc/Nod2/Gimap5
GO:2001234	negative regulation of apoptotic signaling pathway	233	0.359345	1.45261	0.00084712	0.00084712	0.00912558	2057	tags=23%, list=12%, signal=20%	Csf2/Higd1a/Eno1/Mif/Eno1b/Nrg1/Serpine1/Vegfa/Hspb1/Cx3cl1/Ptgs2/Siah2/Ier3/Hyou1/Gdnf/Wnt16/Nol3/Prelid1/Ivns1abp/Noc2l/Hells/Slc25a5/Hif1a/Snai1/Bok/Selenos/Tnfrsf23/Slc25a4/Creb3/Nle1/Park7/Ppia/Wnt4/Lmna/Fxn/Xbp1/Sfrp2/Itprip/Sh3glb1/Hmox1/Rps6kb1/Unc5b/Atf4/Pycr1/Prdx2/Bax/Parl/Cd44/Ackr3/Eya2/Aatf/Cdk11b/Map2k1
GO:0001945	lymph vessel development	31	-0.726467	-1.77946	0.000854537	0.000854537	0.00918503	1943	tags=45%, list=11%, signal=40%	Npr2/Vegfc/Nr2f2/Foxc1/Epha2/Tmem204/Syk/Clec14a/Prox1/Acvr2b/Flt4/Sox18/Kdr/Tie1
GO:0072524	pyridine-containing compound metabolic process	168	0.396075	1.54743	0.00086646	0.00086646	0.00929253	1122	tags=20%, list=6%, signal=19%	Aldoc/Eno1/Pgk1/Eno1b/Pfkl/Slc2a6/Tpi1/Pgam1/Ldha/Pkm/Gapdh/Gale/Pdxp/Aldoa/Gck/Galk1/Htr2a/Prdx5/Ier3/Aldh1l2/Eif6/Gpi1/Adpgk/Pcx/Me1/Enpp1/Hif1a/Ddit4/Txnrd1/Mdh2/Nnmt/Pfkp/Tkt
GO:0050801	monoatomic ion homeostasis	514	-0.431004	-1.39501	0.00086938	0.00086938	0.00930322	2151	tags=19%, list=12%, signal=17%	Cyb561/Cp/Hexb/Ank1/Hfe/Atp6v0d2/Gm6377/Stc1/B2m/Pdk4/Tgm2/Lyn/Mllt6/Ubash3b/Cln6/Mcoln1/Xcl1/Grn/Cnnm3/Ppt1/Agtr1a/Atp2b4/Pdk2/Atp1b1/Plcg2/Wnk4/Pml/Ank2/Itpr3/Cnnm1/Plcb1/Dmd/Grina/Cln3/Efhc1/Car7/Steap4/Rab20/Wnt5a/Dmpk/Tmem64/Slc12a6/Cav1/P2rx7/Mtss1/Ptpn6/Steap3/Kcnh2/Cxcl9/Cxcl10/Pthlh/Ednra/Slc24a5/Tmtc2/Epas1/Klhl3/Ccl8/Nr3c2/Slc8b1/Scara5/Kcna1/Slc25a27/Npy1r/Coro1a/Atp2a1/Tmc8/Cav2/Inpp…
GO:0002448	mast cell mediated immunity	42	-0.687746	-1.77999	0.000871654	0.000871654	0.00930696	2445	tags=43%, list=14%, signal=37%	Chga/Rasgrp1/Fgr/Adora2b/Lyn/Cplx2/Gab2/Lat2/Syk/Stxbp2/Fcer1g/Rac2/Nppc/Cd84/Spon2/Cd300a/Gata2/Kit
GO:0010720	positive regulation of cell development	488	-0.433214	-1.40238	0.00088136	0.00088136	0.00938987	2004	tags=21%, list=11%, signal=19%	Axl/Caprin2/Synj1/Tlr2/Tgm2/Pde3a/Lyn/Met/Il7r/Dixdc1/Ptn/Gja1/Vegfc/Notch1/Slitrk1/Smarca2/Cxcl12/Ppargc1b/Bmp4/Sox11/Itpkb/Parp6/Myod1/Atp11c/Zfp36l1/Il33/Stat5a/Cysltr1/Vsir/Il34/Mme/Irf1/Notch2/Wnt5a/Tmem64/Gjc2/H2-DMa/Hlx/Ntn1/Dcx/Shtn1/Sema5a/Nlrp3/Flt3l/Robo2/Plxnd1/Ccl3/Sox13/Trem2/Socs1/Syk/Csf1r/Zbtb46/Etv5/Tnfsf9/Cd46/Tyrobp/Prkch/Ntrk2/Tnfrsf11a/Pik3r6/Sema4d/Spi1/Il10/Il23a/Il15/Cx3c…
GO:0002347	response to tumor cell	43	-0.689271	-1.78625	0.000884196	0.000884196	0.00939937	2627	tags=44%, list=15%, signal=38%	Mr1/H2-Q7/H2-D1/Gsdme/Notch1/Klrk1/Xcl1/Dapk1/Notch2/Txnip/H2-Q6/Laptm5/Spi1/Cd274/Ahr/Cd24a/H2-Q4/Abi3/Ceacam1
GO:0071396	cellular response to lipid	447	-0.437269	-1.41745	0.000888878	0.000888878	0.00942843	2202	tags=23%, list=12%, signal=21%	Cr2/Shpk/Gnas/Stap1/Kdm5d/Ncoa3/Ticam2/Brinp3/Trim5/Axl/Aldh1a2/B2m/Pdk4/Casp9/Lyn/Dab2/Cd86/Klrk1/Ppargc1b/Padi2/Bmp4/Irs1/Trerf1/Mmp2/Agtr1a/Sash1/Myod1/Sbno2/Plcg2/Zfp36l1/Ncoa2/Pid1/Trim12c/Gpr155/P2ry6/Plcb1/Zfp36/Tfap4/Trim30d/Snai2/Tlr4/Igtp/Trim12a/Cd55/Ptch1/Nlrp3/Calcoco1/Mrc1/Trem2/Cxcl9/Syk/Ly96/Irgm2/Cxcl10/Irgm1/Cd68/Hmga2/Plscr4/Ogt/Trim30a/Cd180/Ntrk2/Crebrf/Nr3c2/Gpld1/Pde2a/Spi1…
GO:0019362	pyridine nucleotide metabolic process	160	0.40712	1.55286	0.00091118	0.00091118	0.00962372	843	tags=18%, list=5%, signal=17%	Aldoc/Eno1/Pgk1/Eno1b/Pfkl/Slc2a6/Tpi1/Pgam1/Ldha/Pkm/Gapdh/Gale/Aldoa/Gck/Galk1/Htr2a/Prdx5/Ier3/Aldh1l2/Eif6/Gpi1/Adpgk/Pcx/Me1/Enpp1/Hif1a/Ddit4/Txnrd1/Mdh2
GO:0034248	regulation of amide metabolic process	376	0.317392	1.36809	0.000911269	0.000911269	0.00962372	2959	tags=29%, list=17%, signal=24%	Thbs1/Pkm/Gapdh/Pdk1/Mvk/Eif4ebp1/Nolc1/Eif5a/Eif6/Eif3b/Serp1/Nat10/Prkca/Picalm/Ybx1/Gspt1/Shmt2/Sesn2/Ifrd2/Prmt1/Etf1/Dap/Calr/Pdk3/Ajuba/Eif2s1/Dnajc3/Pin1/Gemin5/Spon1/Pus7/Bc1/Eif4e2/C1qbp/Pum3/Tsfm/Ncl/Cpeb2/Dapk3/Bzw2/Btg2/Rcc1l/Tyms/Coa3/Abce1/Pa2g4/Srp9/Rps6kb1/Ccn1/Uqcc2/Mpv17l2/Ptbp1/Magoh/Eif2b5/Eif4a3/Ncbp1/Tmed2/Eif1/Cdk4/Larp1/Prr16/Npm1/Eif3d/Eif4g1/Rbm3/Samd4/Hnrnpu/Caprin1/Sph…
GO:0043303	mast cell degranulation	40	-0.681936	-1.75076	0.000928169	0.000928169	0.00978084	2445	tags=42%, list=14%, signal=37%	Chga/Rasgrp1/Fgr/Adora2b/Lyn/Cplx2/Gab2/Lat2/Syk/Stxbp2/Fcer1g/Rac2/Nppc/Cd84/Cd300a/Gata2/Kit
GO:0097696	receptor signaling pathway via STAT	140	-0.527427	-1.59507	0.00093137	0.00093137	0.00979324	2542	tags=30%, list=14%, signal=26%	Stat5b/Pias1/Ptprd/Thpo/Agap2/Fyn/Tyk2/Bcl3/Egf/Prlr/Stat4/Parp9/Lyn/Il7r/Notch1/Stat5a/Ghr/Irf1/Sh2b3/Il10rb/Cav1/Gadd45a/Socs1/Csf1r/Csf2rb2/Stat2/Tslp/Socs3/Hmga2/Parp14/Il10/Il23a/Il15/Csf2rb/Hcls1/Ptprc/Il10ra/Osm/Cd300a/Kit/Pecam1/Stra6
GO:0071805	potassium ion transmembrane transport	147	-0.5295	-1.6017	0.000940709	0.000940709	0.00986998	1659	tags=22%, list=9%, signal=20%	P2ry12/Akap7/Atp1b1/Wnk4/Kcnh3/Ank2/Kcnj2/Fhl1/Slc12a6/Cav1/Kcnq4/Kcnh2/Trem2/Klhl24/Agrn/Kcnb1/Kcnt2/Nr3c2/Kcna1/Kcnj13/Atp1b2/Kcns3/Abcc9/Casq2/Atp1a2/Kcnn3/Edn3/Kcng4/Kcnj8/Kcnc2/Lrrc55/Kcna5
GO:0061437	renal system vasculature development	27	-0.764753	-1.83783	0.000961914	0.000961914	0.0100269	1845	tags=56%, list=10%, signal=50%	Nrp1/Osr1/Notch1/Bmp4/Notch2/C3ar1/Tek/Ednra/Notch3/Pdgfra/Angpt2/Gpr4/Bmp7/Aqp1/Pdgfb
GO:0061440	kidney vasculature development	27	-0.764753	-1.83783	0.000961914	0.000961914	0.0100269	1845	tags=56%, list=10%, signal=50%	Nrp1/Osr1/Notch1/Bmp4/Notch2/C3ar1/Tek/Ednra/Notch3/Pdgfra/Angpt2/Gpr4/Bmp7/Aqp1/Pdgfb
GO:0002327	immature B cell differentiation	15	-0.838097	-1.78448	0.000963897	0.000963897	0.0100269	1594	tags=47%, list=9%, signal=43%	Atp11c/Traf3ip2/Laptm5/Spi1/Cd24a/Ighm/Kit
GO:0098760	response to interleukin-7	17	0.753549	1.91703	0.000963961	0.000963961	0.0100269	1485	tags=47%, list=8%, signal=43%	Eno1/Hspd1/Ybx1/Pdia3/Rad23b/Stip1/P4hb/Atic
GO:0050853	B cell receptor signaling pathway	49	-0.666315	-1.7776	0.000976225	0.000976225	0.0101327	1580	tags=39%, list=9%, signal=35%	Stap1/Lyn/Plcg2/Nfam1/Lat2/Ptpn6/Syk/Blnk/Prkch/Cd38/Tec/Lpxn/Nckap1l/Cd22/Ptprc/Prkcb/Cd300a/Klhl6/Ighm
GO:0000462	maturation of SSU-rRNA from tricistronic rRNA transcript (SSU-rRNA, 5.8S rRNA, LSU-rRNA)	32	0.658581	1.96346	0.000986863	0.000986863	0.0102212	4565	tags=72%, list=26%, signal=54%	Bysl/Wdr46/Rcl1/Tsr1/Rrs1/Tbl3/Heatr1/Wdr43/Utp3/Nol10/Rpp40/Gtf2h5/Dcaf13/Dhx37/Fcf1/Rps19/Abt1/Utp6/Tsr2/Rps16/Ngdn/Pwp2/Ercc2
GO:0044270	cellular nitrogen compound catabolic process	470	0.303423	1.30802	0.00100498	0.00100498	0.0103866	2376	tags=23%, list=13%, signal=21%	Aldoc/Eno1/Pgk1/Eno1b/Pfkl/Slc2a6/Tpi1/Pgam1/Pkm/Gapdh/Gale/Pdxp/Aldoa/Gck/Galk1/Htr2a/Vegfa/Cda/Ier3/Gdnf/Endog/Aldh1l2/Mrto4/Eif6/Zpr1/Nt5c/Gpi1/Ybx1/Gspt1/Entpd6/Pop1/Acot7/Nudt19/Etf1/Dctpp1/Adpgk/Isg20/Nsun2/Nbas/Enpp1/Hif1a/Ada/Ddit4/Exosc4/Pabpc4/Dut/Dera/Lsm4/Nudt18/Exosc5/Zcchc17/Ddx49/Pfkp/Fen1/Tbrg4/Hnrnpab/Vim/Exosc8/Lsm6/Btg2/Aasdhppt/Gmpr2/Exosc1/Hmox1/Arl2/Ptbp1/Magoh/Eif4a3/Ncbp1/…
GO:0030150	protein import into mitochondrial matrix	18	0.748859	1.91791	0.00103146	0.00103146	0.0105867	1877	tags=56%, list=11%, signal=50%	Tomm40/Grpel1/Timm17a/Timm23/Dnajc15/Timm50/Dnlz/Timm17b/Tomm20/Tomm70a
GO:0045058	T cell selection	50	-0.660873	-1.77172	0.0010326	0.0010326	0.0105867	1155	tags=24%, list=6%, signal=23%	H2-DMa/Syk/Il23a/Il15/Batf/Card11/Cd74/Dock2/Ptprc/Ly9/Jag2/Cd28
GO:0042552	myelination	160	-0.522735	-1.60526	0.0010328	0.0010328	0.0105867	2223	tags=23%, list=12%, signal=20%	Abca2/Fyn/Wasf3/Adam22/Hexb/Tppp/Lpin1/Tlr2/Ptn/Abcd2/Cntnap1/Psap/Galc/Myoc/Lgi4/Tspan2/Tcf7l2/Rarb/Gpm6b/Clu/Ntrk2/Cd9/Tnfrsf21/Plp1/Jam2/Itgax/Cxcr4/Ntf3/Ncmap/Gjc3/Cmtm8/Tenm4/Erbb3/Sh3tc2/Ngfr/Mall/Cldn5
GO:0006260	DNA replication	258	0.346556	1.41452	0.0010365	0.0010365	0.0105867	3791	tags=39%, list=21%, signal=31%	Ooep/Ereg/Dtd1/Endog/Zpr1/Hras/Wdr18/Ruvbl2/Pclaf/Nasp/Grwd1/Pole4/Cenpx/Gins2/Cacybp/Mcm5/Polb/Ccne1/Fen1/Orc2/Mcm8/Dnajc2/Ccne2/Pold2/Pole3/Chaf1b/Rfc2/Faf1/Mcm3/Npm1/Rrm1/Cinp/Sde2/Rfc5/Baz1a/Smarca5/Gmnn/Mcm10/Chaf1a/Mcm6/Ticrr/Nucks1/Pold1/Topbp1/Tbrg1/Ssrp1/Cenps/Rad51/Mcm4/Cdk1/Lig3/Rbbp8/Rmi2/Polq/Uchl5/Parp1/Gins4/Ruvbl1/Orc6/Senp2/Inppl1/Cdk9/Tnfaip1/Zmpste24/Brca1/Ino80/Smc3/E2f7/Lrwd1…
GO:0043367	CD4-positive, alpha-beta T cell differentiation	90	-0.573913	-1.63709	0.00103713	0.00103713	0.0105867	1170	tags=21%, list=7%, signal=20%	Irf1/Satb1/Hlx/Nlrp3/Socs1/Gpr183/Il23a/Batf/Nckap1l/Il2rg/Nfkbid/Rsad2/Ly9/Ccr2/Sash3/Cd83/Lef1/Gimap5/Gimap1
GO:0042492	gamma-delta T cell differentiation	15	-0.836279	-1.78061	0.00103748	0.00103748	0.0105867	1534	tags=53%, list=9%, signal=49%	Stat5a/Sox13/Syk/Nckap1l/Ptprc/Jag2/Lef1/Gimap5
GO:0010934	macrophage cytokine production	46	-0.664522	-1.75712	0.00104376	0.00104376	0.0106285	2038	tags=39%, list=11%, signal=35%	Axl/Tlr2/Acp5/Plcg2/Gprc5b/Tlr4/Wnt5a/Casp4/Tlr3/P2rx7/Nlrp3/Laptm5/Il1b/Cd74/Nod2/Tlr7/Spon2/Cd36
GO:0044546	NLRP3 inflammasome complex assembly	38	-0.695025	-1.77478	0.0010549	0.0010549	0.0106968	1580	tags=34%, list=9%, signal=31%	Plcg2/Tlr4/Igtp/Casp4/Fbxl2/Nlrp3/Trem2/Irgm2/Irgm1/Trim30a/Gbp5/Cd36/Kcnj8
GO:0140632	canonical inflammasome complex assembly	38	-0.695025	-1.77478	0.0010549	0.0010549	0.0106968	1580	tags=34%, list=9%, signal=31%	Plcg2/Tlr4/Igtp/Casp4/Fbxl2/Nlrp3/Trem2/Irgm2/Irgm1/Trim30a/Gbp5/Cd36/Kcnj8
GO:0046434	organophosphate catabolic process	204	0.366533	1.47357	0.00105941	0.00105941	0.0107201	1079	tags=18%, list=6%, signal=17%	Aldoc/Eno1/Pgk1/Eno1b/Pfkl/Slc2a6/Tpi1/Pgam1/Pkm/Gapdh/Gale/Pdxp/Aldoa/Gck/Galk1/Htr2a/Smpdl3b/Cda/Ier3/Ldlr/Eif6/Nt5c/Gpi1/Entpd6/Acot7/Nudt19/Prdx6/Dctpp1/Adpgk/Enpp1/Hif1a/Ada/Ddit4/Dut/Dera/Nudt18/Pfkp
GO:0007157	heterophilic cell-cell adhesion via plasma membrane cell adhesion molecules	43	-0.685071	-1.77536	0.00107232	0.00107232	0.0108281	668	tags=26%, list=4%, signal=25%	Sele/Mcam/Selp/Cd24a/Hmcn1/Itga4/Itgal/Cadm1/Tenm4/Tenm2/Scarf1
GO:0006177	GMP biosynthetic process	15	0.76266	1.87417	0.00107718	0.00107718	0.0108509	2243	tags=60%, list=13%, signal=53%	Ampd1/Ada/Gart/Atic/Impdh1/Adsl/Gmps/Impdh2/Aprt
GO:0006695	cholesterol biosynthetic process	46	0.583164	1.8338	0.00108131	0.00108131	0.0108509	1951	tags=46%, list=11%, signal=41%	Fdps/Dhcr24/Idi1/Cyp51/Msmo1/Hmgcs1/Mvd/Fdft1/Insig1/Mvk/Hmgcr/Hsd17b7/Ebp/Apoa1/Lss/Pmvk/Srebf2/Dhcr7/Tm7sf2/Cyb5r3/Scp2
GO:1902653	secondary alcohol biosynthetic process	46	0.583164	1.8338	0.00108131	0.00108131	0.0108509	1951	tags=46%, list=11%, signal=41%	Fdps/Dhcr24/Idi1/Cyp51/Msmo1/Hmgcs1/Mvd/Fdft1/Insig1/Mvk/Hmgcr/Hsd17b7/Ebp/Apoa1/Lss/Pmvk/Srebf2/Dhcr7/Tm7sf2/Cyb5r3/Scp2
GO:0032673	regulation of interleukin-4 production	37	-0.703531	-1.78731	0.00109785	0.00109785	0.010975	1061	tags=41%, list=6%, signal=38%	Prkcq/H2-Q7/H2-D1/Il33/Nlrp3/Icosl/Syk/H2-Q6/Fcer1g/H2-T23/H2-Q4/Sash3/Cd83/Cd28/Lef1
GO:0016032	viral process	288	-0.47089	-1.49431	0.00109822	0.00109822	0.010975	2371	tags=25%, list=13%, signal=22%	Inpp5k/Ccnt2/Zfp809/Shfl/Prkn/Isg15/Insr/Trim5/Axl/Rab43/Oasl1/Fbln1/Gsn/Ifi204/Ifitm6/Notch1/Trim14/Agtr1a/Dynlt1a/Igf2r/Dynlt1b/Trim6/Apobec3/Trim25/Dynlt1c/Ctsb/Zc3hav1/Znfx1/Trim12c/Tpcn1/Zfp36/Zfyve1/Ciita/Tfap4/Ly6e/Trim30d/Map3k1/Trim12a/Trim21/Cav1/Fbxl2/Ifih1/Mndal/Pde12/Oas1a/Csf1r/Bcl2l11/Oas1g/Sp100/Hmga2/Trim30a/Ccl8/Oas1c/Rnasel/Oasl2/Prox1/Trim34a/Ifi203/Cd74/Cav2/Ifitm1/Cxcr4/Ch25…
GO:0140888	interferon-mediated signaling pathway	73	-0.614456	-1.7218	0.00110086	0.00110086	0.0109787	2166	tags=52%, list=12%, signal=46%	Arg1/Trim65/Zbp1/Ifitm3/Jak2/Ythdf3/Pparg/Ifngr1/Adar/Tbk1/Stat1/Txk/Hdac4/Isg15/Tyk2/Parp9/Ikbke/Ifitm6/Usp27x/Trim6/Irf1/Rbm47/Igtp/Wnt5a/Ifih1/Irf7/Oas1a/Irgm2/Stat2/Irgm1/Oas1g/Parp14/Oas1c/Nlrc5/Ifitm1/Usp29/Oas2/Oas3
GO:0051701	biological process involved in interaction with host	114	-0.554664	-1.63729	0.00112305	0.00112305	0.0111745	2080	tags=32%, list=12%, signal=28%	Insr/Trim5/Axl/Fbln1/Gsn/Ifitm6/Agtr1a/Dynlt1a/Dynlt1b/Trim6/Trim25/Dynlt1c/Ctsb/Trim12c/Tpcn1/Ciita/Fuca2/Ly6e/Trim30d/Trim12a/Trim21/Scarb1/Cav1/Bcl2l11/Trim30a/Gbp7/Trim34a/Gbp2/Cd74/Cav2/Pglyrp1/Ifitm1/Ch25h/Gbp3/Gbp6/Gbp9
GO:0010608	post-transcriptional regulation of gene expression	459	0.304261	1.31208	0.00112511	0.00112511	0.0111745	3938	tags=34%, list=22%, signal=28%	Thbs1/Pkm/Gapdh/Vegfa/Mvk/Eif4ebp1/Nolc1/Gdnf/Eif5a/Eif6/Eif3b/Serp1/Nat10/Prkca/Ybx1/Gspt1/Shmt2/Sesn2/Ifrd2/Prmt1/Etf1/Dap/Nsun2/Calr/Ajuba/Eif2s1/Dnajc3/Pabpc4/Gemin5/Pus7/Bc1/Eif4e2/C1qbp/Spout1/Pum3/Exosc5/Zcchc17/Ddx49/Tsfm/Ncl/Tbrg4/Cpeb2/Dapk3/Vim/Exosc8/Bzw2/Btg2/Rcc1l/Tyms/Coa3/Abce1/Pa2g4/Srp9/Rps6kb1/Uqcc2/Mpv17l2/Ptbp1/Magoh/Eif2b5/Eif4a3/Ncbp1/Exosc2/Tmed2/Eif1/Cdk4/Zc3h18/Larp1/Fas…
GO:0007030	Golgi organization	131	0.438686	1.6289	0.00113477	0.00113477	0.0112474	4027	tags=41%, list=23%, signal=32%	Plk3/Atp8b4/Fam174b/Prkd1/Tmed9/Pde4dip/Kifc3/Lman1/Fhdc1/Vti1b/Surf4/Tmed2/Gorasp2/Atl2/Prmt5/Tmed3/Rab2a/Tmed1/Trip11/Uso1/Fbxw8/Blzf1/Atp8b3/Gorasp1/Arl1/Map2k2/Pi4k2b/Map2k1/Vmp1/Gbf1/Akap9/Tmed10/Cdk1/Stx18/Nsfl1c/Stk25/Hikeshi/Tmed5/Cog1/Cog2/Sec22b/Bag5/Yipf5/Sec16a/Cdc42/Vps51/Lrrk2/Rab29/Syne1/Rab1a/Golga5/Rab8a/Cog8/Rab33b
GO:0006911	phagocytosis, engulfment	50	-0.65838	-1.76503	0.00115197	0.00115197	0.0113945	2129	tags=40%, list=12%, signal=35%	Stap1/Gulp1/Gsn/Plcg2/Fcgr3/Elmo1/Bin2/Trem2/Msr1/Appl2/Fcer1g/Itgb2/Nckap1l/Fcgr2b/Abca1/Arhgap25/Fcgr1/Cd300a/Gata2/Cd36
GO:0046700	heterocycle catabolic process	473	0.302596	1.29022	0.0011549	0.0011549	0.0114002	2376	tags=23%, list=13%, signal=21%	Aldoc/Eno1/Pgk1/Eno1b/Pfkl/Slc2a6/Tpi1/Pgam1/Pkm/Gapdh/Gale/Pdxp/Aldoa/Gck/Galk1/Htr2a/Vegfa/Cda/Ier3/Gdnf/Endog/Aldh1l2/Mrto4/Eif6/Zpr1/Nt5c/Gpi1/Ybx1/Gspt1/Entpd6/Pop1/Acot7/Nudt19/Etf1/Dctpp1/Adpgk/Isg20/Nsun2/Nbas/Enpp1/Hif1a/Ada/Ddit4/Exosc4/Pabpc4/Dut/Dera/Lsm4/Nudt18/Exosc5/Zcchc17/Ddx49/Pfkp/Fen1/Tbrg4/Hnrnpab/Vim/Exosc8/Lsm6/Btg2/Aasdhppt/Gmpr2/Exosc1/Hmox1/Arl2/Ptbp1/Magoh/Eif4a3/Ncbp1/…
GO:0046632	alpha-beta T cell differentiation	123	-0.541671	-1.61572	0.00117685	0.00117685	0.0115777	2888	tags=31%, list=16%, signal=26%	Ctsl/Rara/Zc3h12a/Txk/Malt1/Atf2/Ccr7/Pla2g2d/Sh3rf1/Cracr2a/Gli3/Bcl3/Stat4/Psap/Itpkb/Irf1/Igtp/Satb1/Hlx/Nlrp3/Socs1/Syk/Gpr183/Il23a/Batf/Nckap1l/Prdm1/Il2rg/Nfkbid/Lilrb4a/Rsad2/Ly9/Ccr2/Sash3/Cd83/Lef1/Gimap5/Gimap1
GO:0001558	regulation of cell growth	396	0.31147	1.35713	0.00117767	0.00117767	0.0115777	1900	tags=19%, list=11%, signal=17%	Ccn5/Fdps/Rgs4/Eno1/Plaat1/Eno1b/Mfsd2a/Ngf/Nrg1/Hbegf/Plxna4/Cgref1/Tnfrsf12a/Slit2/Cryab/Smad7/Ccn3/Vegfa/Cda/Sfrp1/Agt/Tnc/Ifrd1/Ccn4/Cav3/Picalm/Sesn2/Sgk1/Nubp1/Bdkrb1/Enpp1/Ppan/Exosc4/Pin1/P3h1/Sertad1/Dbnl/Slc25a4/Creb3/Ccdc85b/Map1b/Avpr1a/Prr5/Ddx49/Ryk/Fxn/Xbp1/Ctdp1/Sfrp2/Cfl1/Dnajc2/Dbn1/Sh3glb1/Dnajb2/Sertad2/Smarca4/Sema3d/Ncbp1/Exosc2/Trpv2/Cib1/Lamtor2/Acsl4/Npm1/Actr3/Eif4g1/Eif…
GO:0043491	phosphatidylinositol 3-kinase/protein kinase B signal transduction	268	-0.473988	-1.50004	0.0011885	0.0011885	0.0116604	2392	tags=27%, list=13%, signal=24%	Rasgrp1/Inpp5k/Mertk/Inpp5e/Fgr/Tspyl5/Thpo/C1qtnf1/Agap2/Fyn/Plxnb1/Col6a2/Insr/Axl/Arrb2/Egf/Atg14/Cxcl12/Irs1/Col6a3/P2ry12/Pear1/Pik3r2/Zfp36l1/Aim2/Myoc/Mtm1/Pik3c2b/Pik3ip1/Gab2/Epha2/Sh2b3/Flcn/Tmem100/Tek/Fbxl2/Sema5a/Tcf7l2/Ptpn6/Trem2/Dcn/Spry2/Csf1r/Gcnt2/Gdf15/Ntrk2/Sema4d/Igfbp5/Pdgfra/Cx3cr1/Pik3ap1/Rapgef3/Xdh/Selp/Inpp4b/Hcls1/Hmga1/Prex2/Osm/Akr1c14/Hcst/Cd28/Reln/Erbb3/Flt1/Ngfr…
GO:2000767	positive regulation of cytoplasmic translation	12	0.841488	1.94272	0.00119327	0.00119327	0.0116835	2492	tags=50%, list=14%, signal=43%	Pkm/Ybx1/Hnrnpu/Cnbp/Syncrip/Hnrnpd
GO:0030889	negative regulation of B cell proliferation	19	-0.808191	-1.81921	0.00120595	0.00120595	0.0117838	1904	tags=53%, list=11%, signal=47%	Lyn/Pkn1/Tyrobp/Tnfrsf21/Tnfrsf13b/Il10/Cd24a/Inpp5d/Fcgr2b/Cd300a
GO:0018212	peptidyl-tyrosine modification	274	-0.469696	-1.48725	0.00122518	0.00122518	0.0119106	2143	tags=25%, list=12%, signal=23%	Ddr2/Tpst1/Insr/Dgkq/Arrb2/Tspan9/Pxn/Egf/Prlr/Parp9/Lyn/Efna1/Aatk/Clk1/Adra1a/Plcg2/Stat5a/Lrp4/Ghr/Il34/Gprc5b/Irf1/Gfra1/Tlr4/Tek/Vtn/Cav1/Ptpn6/Trem2/Socs1/Syk/Csf1r/Agrn/Tslp/Cspg4/Socs3/Parp14/Fgfr4/Sema4d/Samsn1/Itgb2/Clec4n/Il23a/Il15/Pdgfra/Plpp3/Cd24a/Fgf10/Cd74/Lilrb4a/Cav2/Hcls1/Ptprc/Nod2/Ntf3/Osm/Hck/Kitl/Cd300a/Reln/Ighm/Flt1/Flt4/Kit/Cd36/Abi3/Pecam1/Kdr/Pdgfb
GO:0033044	regulation of chromosome organization	234	0.357154	1.44017	0.00122623	0.00122623	0.0119106	4967	tags=43%, list=28%, signal=32%	Anapc15/Nat10/Cct3/Nek6/Ruvbl2/Cct7/Spc24/Pinx1/Bub1/Lmna/Cct6a/Tcp1/Fen1/Phf10/Cct2/Gnl3/Smarca4/Cdc16/Naa10/Cdk5rap2/Anapc4/Dkc1/Birc5/Cct8/Hnrnpu/Cct5/Smarca5/Bcl7c/Ercc1/Tpr/Trip13/Senp6/Zwilch/Sfpq/Smarcb1/Spdl1/Smarcc1/Cdk1/Rmi2/Uchl5/Hnrnpd/Parp1/Ruvbl1/Ube2c/Smg5/Sirt1/Smc2/Zwint/Ino80/Spc25/Cct4/Xrcc5/Hnrnpa2b1/Bmyc/Tfpt/Actb/Yy1/Plk1/Incenp/Mphosph8/H3f3b/Slx4/Aurkb/Ppp1r10/Cdca8/Trp53/…
GO:0002040	sprouting angiogenesis	125	-0.549496	-1.63873	0.00122631	0.00122631	0.0119106	1859	tags=28%, list=10%, signal=25%	Vegfc/Notch1/Bmp4/Agtr1a/Pik3r2/Tgfbr3/Epha2/Sh2b3/Dll1/Vstm4/Tek/Sema6a/Sema5a/Glul/Ramp2/Meox2/Clec14a/Rnf213/Gpld1/Il10/Mmrn2/Card10/Fgf1/Gata2/Lef1/Flt1/Flt4/Ngfr/Cdh13/Ppp1r16b/Nrarp/Kdr/Ceacam1/Dll4/Aplnr
GO:0003018	vascular process in circulatory system	209	-0.497002	-1.55019	0.00123312	0.00123312	0.0119528	1934	tags=23%, list=11%, signal=21%	Adora2b/Pde3a/Gja1/Amot/Ptp4a3/Itga1/Adra1a/Foxc1/Mmp2/Agtr1a/Slc27a1/Cysltr1/Mgll/Tgfbr3/Ptgs1/Slc22a5/Akap12/Vstm4/Ccl4/Cav1/Ramp2/Ednra/Npr1/Pde2a/Cd38/Npy1r/Ahr/Ace/Gucy1a1/Tbxas1/Nppc/Gpr4/Itga4/Nos3/Plvap/Abcb1a/Ednrb/Atp1a2/Cd36/Edn3/Kcnj8/P2ry1/Kdr/Pdgfb/Ceacam1/Agtr2/Cdh5/Kcna5/Cldn5
GO:0002009	morphogenesis of an epithelium	484	-0.425514	-1.37797	0.00124656	0.00124656	0.0120358	2519	tags=23%, list=14%, signal=20%	Pik3cd/Camsap3/Clasp2/Alms1/Nrp1/Spint2/Tead2/Apaf1/Lamc1/Osr1/Ttc8/Stard13/Arhgap24/Vangl2/Ift122/Rreb1/Gli3/Ophn1/Ncoa3/C2cd3/Aldh1a2/Pxn/Egf/Tmem67/Tgm2/Met/Gja1/Vegfc/Notch1/Cxcl12/Bmp4/Ccdc40/Ntn4/Sox11/Smad3/Lgr4/Mmp2/Agtr1a/Foxd1/Stat5a/Wnk4/Pml/Col4a1/Tctn1/Gli2/Epha2/Adamts12/Snai2/Alox12/Dll1/Cd151/Bmp5/Map3k1/Notch2/Gpc3/Wnt5a/Tek/Ccdc39/Ntn1/Ptch1/Sema5a/Mtss1/Rdh10/Plxnd1/Spry2/Spry1…
GO:0034762	regulation of transmembrane transport	411	-0.440392	-1.42238	0.00124911	0.00124911	0.0120358	1904	tags=20%, list=11%, signal=18%	Lyn/Met/Repin1/Clip3/Ubash3b/Fxyd3/Bmp4/Irs1/Scn2b/Agtr1a/Atp2b4/Akap7/Atp1b1/Plcg2/Pid1/Wnk4/Dapk1/Pml/Ank2/Plcb1/Dmd/Slc38a1/Zfas1/Cacng7/Kcnj2/Fhl1/Gpc3/Slc43a2/Gjc2/Cav1/P2rx7/Ptpn6/Kcnh2/Trem2/Cxcl9/Klhl24/Ctss/Agrn/Appl2/Cxcl10/Mrln/Ednra/Rem1/Nr3c2/Plp1/Rtn2/Rnasel/Slc25a27/Ahr/Coro1a/Il1b/Esr1/Rapgef3/Kcnj13/Mmp9/Ace/Shank3/Atp1b2/Klf15/Chp2/Prrt1/Adcyap1r1/Prkcb/Chd7/Abcb1a/Clec4b1/Abcc9…
GO:1901361	organic cyclic compound catabolic process	500	0.293415	1.26983	0.00124915	0.00124915	0.0120358	2376	tags=22%, list=13%, signal=20%	Dio3/Aldoc/Eno1/Pgk1/Eno1b/Pfkl/Slc2a6/Tpi1/Pgam1/Pkm/Gapdh/Gale/Pdxp/Aldoa/Gck/Galk1/Htr2a/Vegfa/Cda/Ier3/Gdnf/Endog/Aldh1l2/Mrto4/Eif6/Zpr1/Nt5c/Gpi1/Ybx1/Gspt1/Entpd6/Pop1/Acot7/Nudt19/Etf1/Dctpp1/Adpgk/Isg20/Nsun2/Nbas/Enpp1/Hif1a/Ada/Ddit4/Comt/Exosc4/Pabpc4/Dut/Dera/Lsm4/Nudt18/Exosc5/Zcchc17/Ddx49/Pfkp/Fen1/Tbrg4/Hnrnpab/Vim/Exosc8/Lsm6/Btg2/Aasdhppt/Gmpr2/Exosc1/Hmox1/Arl2/Ptbp1/Magoh/Eif…
GO:0140115	export across plasma membrane	57	-0.633198	-1.72424	0.00125311	0.00125311	0.0120499	2064	tags=25%, list=12%, signal=22%	Abcc5/Gja1/Atp1b1/Slc27a1/Wnk4/Kcnh2/Agrn/Kcnb1/Kcnt2/Atp1b2/Abca1/Abcb1a/Atp1a2/Kcna5
GO:0043549	regulation of kinase activity	528	-0.423871	-1.37304	0.00125763	0.00125763	0.0120694	2392	tags=22%, list=13%, signal=19%	Rasgrp1/Inpp5k/Mertk/Spred1/Fgr/Kat2b/Vangl2/Agap2/Fbxo7/Prkn/Ddr2/Insr/Ephb4/Map2k6/Axl/Arrb2/Ccng2/Pxn/Egf/Prlr/Lyn/Efna1/Met/Vegfc/Nr2f2/Cd86/Trib2/Ubash3b/Adra1a/Synpo2/Mmd/Pkn1/Ttn/Atp2b4/Sash1/Map3k5/Wnk4/Il34/Gprc5b/Sh3bp5/Epha2/Tfap4/Tlr4/Igtp/Map3k1/Notch2/Wnt5a/Dbndd2/Tek/Cav1/Map3k11/P2rx7/Ror1/Ptpn6/Gadd45a/Trem2/Socs1/Syk/Spry2/Spry1/Csf1r/Irgm2/Agrn/Irgm1/Deptor/Hmga2/Prkch/Ntrk2/Fg…
GO:0043087	regulation of GTPase activity	295	-0.462135	-1.4683	0.00126913	0.00126913	0.0121556	2856	tags=30%, list=16%, signal=26%	Vav1/Fgd1/Rictor/Arhgap12/Rabgap1/Tbc1d5/Ralgps1/Rhog/Arhgef5/Epha3/Vav3/Ccr7/Rap1gap/Rasgrp1/Dock11/Ttc8/Rasal3/Ralgapa2/Arhgap24/Ccl9/Prex1/Agap2/Arap2/Ralgapa1/Plxnb1/Gnas/Gpr137b/Rab11fip2/Rasgef1b/Gmip/Sh3bp4/Met/Amot/Ralgps2/Xcl1/Dock10/Dennd1b/Tbc1d16/Agap1/Lrch1/Tbc1d4/Epha2/Pot1b/Arhgap6/Syngap1/Als2cl/Wnt5a/Ccl4/Ralgds/Plxnd1/Ccl3/Rapgef4/Chn1/Spry2/Spry1/Sgsm2/Rgma/Agrn/Arhgap27/Arap3/…
GO:0007188	adenylate cyclase-modulating G protein-coupled receptor signaling pathway	163	-0.515124	-1.5807	0.00127679	0.00127679	0.0122048	1778	tags=20%, list=10%, signal=18%	Adra1a/Psap/P2ry12/Atp2b4/Adcy4/Gpr157/Akap12/Arrdc3/Rapgef4/Cxcl9/Ramp2/Cxcl10/Pthlh/Ednra/Calcrl/Pde2a/Ptgir/Adgre1/Gpr65/Abca1/Adcyap1r1/Gpr4/S1pr1/Chrm2/Adgre4/Adgrg1/Ramp3/P2ry1/Adgrf5/Pln/Vipr2/S1pr4
GO:0006887	exocytosis	316	-0.462678	-1.47578	0.00129428	0.00129428	0.0123475	2604	tags=24%, list=15%, signal=21%	Hap1/Exoc4/Rab15/Atp13a2/Stam/Scamp1/Rab3il1/Grik5/Bcl2l1/Git2/Sdcbp/Myo1f/Pip5k1c/Llgl1/Clasp2/Myo1g/Rab27a/Cacna1b/Chga/Prss12/Washc5/Rasgrp1/Sytl3/Fgr/Orai1/Prkn/Rab11fip2/Synj1/Adora2b/Lyn/Stx1b/Notch1/Fbxl20/Prrt2/Sv2c/Trarg1/Ppfia2/Syngr1/Scrn1/Cplx2/Gab2/Lat2/P2rx7/Exoc6/Lin7a/Rapgef4/Steap3/Syk/Stxbp2/Kcnb1/Ccl8/Stx19/Fcer1g/Napb/Spi1/Itgb2/Npy1r/Plek/Coro1a/Cacna1h/Nckap1l/Rac2/Exoc3l/Np…
GO:0009451	RNA modification	144	0.397867	1.48886	0.00130107	0.00130107	0.012388	2814	tags=26%, list=16%, signal=22%	Trmt61a/Pusl1/Nhp2/Jmjd6/Nat10/Yrdc/Ftsj3/Fbl/Gar1/Dnajb11/Nsun2/Bud23/Pus7/Nop2/Trmt6/Dimt1/Elp6/Hnrnpab/Ctu2/Kti12/Dus2/Wdr4/Thumpd1/Dkc1/Tsr3/Nop10/Dus1l/Mettl2/Elp5/Syncrip/Alkbh3/Elp3/Elp1/Qtrt1/Rpusd3/Elp4/Urm1/Thg1l
GO:0046629	gamma-delta T cell activation	19	-0.805799	-1.81383	0.00130468	0.00130468	0.0123976	1534	tags=42%, list=9%, signal=39%	Stat5a/Sox13/Syk/Nckap1l/Ptprc/Jag2/Lef1/Gimap5
GO:0034655	nucleobase-containing compound catabolic process	445	0.311456	1.3105	0.00130722	0.00130722	0.0123976	2376	tags=24%, list=13%, signal=21%	Aldoc/Eno1/Pgk1/Eno1b/Pfkl/Slc2a6/Tpi1/Pgam1/Pkm/Gapdh/Gale/Aldoa/Gck/Galk1/Htr2a/Vegfa/Cda/Ier3/Gdnf/Endog/Mrto4/Eif6/Zpr1/Nt5c/Gpi1/Ybx1/Gspt1/Entpd6/Pop1/Acot7/Nudt19/Etf1/Dctpp1/Adpgk/Isg20/Nsun2/Nbas/Enpp1/Hif1a/Ada/Ddit4/Exosc4/Pabpc4/Dut/Dera/Lsm4/Nudt18/Exosc5/Zcchc17/Ddx49/Pfkp/Fen1/Tbrg4/Hnrnpab/Vim/Exosc8/Lsm6/Btg2/Gmpr2/Exosc1/Arl2/Ptbp1/Magoh/Eif4a3/Ncbp1/Exosc2/Snd1/Nudt11/Zc3h18/La…
GO:0050869	negative regulation of B cell activation	35	-0.717113	-1.79794	0.00131065	0.00131065	0.0124059	795	tags=37%, list=4%, signal=36%	Lyn/Pkn1/Tyrobp/Tnfrsf21/Samsn1/Tnfrsf13b/Laptm5/Il10/Cd24a/Inpp5d/Lilrb4a/Fcgr2b/Cd300a
GO:0022612	gland morphogenesis	134	-0.538936	-1.62453	0.00133268	0.00133268	0.0125898	2168	tags=31%, list=12%, signal=27%	Gli3/Ncoa3/Zfp157/Tgm2/Rps6ka1/Met/Ptn/Notch1/Twsg1/Bmp4/Ntn4/Mmp2/Stat5a/Pml/Gli2/Epha2/Snai2/Notch2/Wnt5a/Nfib/Cav1/Ntn1/Ptch1/Eda/Plxnd1/Pthlh/Tbx2/Etv5/Igfbp5/Prox1/Esr1/Fgf10/Lims2/Fgf1/Ccl11/Csmd1/Bmp7/Gli1/Lama5/Pdgfb/Ceacam1
GO:0010959	regulation of metal ion transport	349	-0.452151	-1.44989	0.00134202	0.00134202	0.0126298	2072	tags=22%, list=12%, signal=20%	Hfe/Ptpn3/Nkain4/Arrb2/Stc1/Egf/B2m/Kcnip3/Lyn/Gja1/Mllt6/Ubash3b/Fxyd3/Cxcl12/Bmp4/Scn2b/Hbp1/P2ry12/Agtr1a/Atp2b4/Akap7/Atp1b1/Plcg2/Wnk4/Pml/Ank2/Plcb1/Dmd/Zfas1/Kcnj2/Epb41/Fhl1/Dmpk/Gjc2/Cav1/P2rx7/Ptpn6/Best1/Kcnh2/Trem2/Cxcl9/Klhl24/Agrn/Cxcl10/Mrln/Ednra/Rem1/Nr3c2/Slc8b1/Plp1/Ahr/Coro1a/Rapgef3/Il16/Ace/Cxcr4/Atp1b2/Chp2/Adcyap1r1/Cd84/Nos3/Chd7/Clec4b1/Abcc9/Cracr2b/Casq2/Atp1a2/Trpc3/E…
GO:0022408	negative regulation of cell-cell adhesion	189	-0.500901	-1.54847	0.00134214	0.00134214	0.0126298	2488	tags=26%, list=14%, signal=23%	Spint2/Pla2g2d/H2-Q7/H2-D1/C1qtnf1/Gli3/Zc3h8/Hfe/Lag3/Zfp608/Notch1/Cd86/Ubash3b/Twsg1/Cxcl12/Bmp4/Vsir/Irf1/Gpnmb/Alox12/Sh2b3/Hlx/Ptpn6/Socs1/Lrrc32/Cd37/Cd9/H2-Q6/Tnfrsf21/H2-T23/Laptm5/Spi1/Il10/Cd274/Fgl2/Cd24a/H2-Q4/Nfkbid/Dtx1/Cd74/Lilrb4a/Tnfaip8l2/H2-Aa/Cd300a/Ripor2/Nrarp/Podxl/Ceacam1/Gimap5
GO:0034330	cell junction organization	715	-0.401025	-1.30475	0.0013783	0.0013783	0.01294	2732	tags=20%, list=15%, signal=18%	Tbx5/Marcks/Epha3/Myo6/Disc1/Igsf9b/Lrrtm3/Mef2c/Mmp14/Actn3/Gja5/Sdcbp/Lzts1/Abhd17b/Sorbs1/Sorbs2/Amigo1/Camsap3/Clasp2/Nrp1/Ptprd/Epb41l3/Lamc1/Hdac7/Nos1ap/Lama3/Fyn/Zdhhc2/Slitrk6/Wasf3/Ophn1/Plxnb1/Insr/Rps6ka5/Pxn/Caprin2/Sdk2/Lmx1a/Tlr2/Ppfibp2/Efna1/Ptn/Gja1/Cacna2d2/Cntnap1/Slitrk1/Taok2/Tns1/Sybu/Itga3/Grn/Smad3/Dock10/Ptprk/Cldn34c1/Ppfia2/Lgi2/Limch1/Myoc/Lrp4/Col4a1/Sema3f/Epha2/Cln…
GO:0009201	ribonucleoside triphosphate biosynthetic process	86	0.475721	1.65006	0.00138046	0.00138046	0.01294	4240	tags=56%, list=24%, signal=43%	Eno1/Eno1b/Aldoa/Nme1/Uck2/Nme2/Ndufab1/Cad/Atpsckmt/Impdh1/Nudt2/Vcp/Ndufb8/Ndufa8/Ndufb10/Ndufb6/Impdh2/Map2k1/Ndufs7/Sdhb/Ndufs3/Ndufs8/Ndufa11/Ndufs5/Ndufs4/Parp1/Nme6/Ndufb9/Ndufb7/Ndufv1/Sdhd/Ndufb11/Ndufs6/Ndufb2/Stoml2/Ndufa13/Dnajc30/Myc/Ndufa9/Ndufv3/Ndufv2/Ndufs2/Ndufa12/Ndufa5/Ndufa10/Ndufb4/Ndufc2/Ndufc1
GO:1904996	positive regulation of leukocyte adhesion to vascular endothelial cell	23	-0.752164	-1.75141	0.00139761	0.00139761	0.0130755	668	tags=26%, list=4%, signal=25%	Sele/Itgb2/Selp/Itga4/Ccr2/Ptafr
GO:0051606	detection of stimulus	158	-0.516188	-1.58062	0.00140403	0.00140403	0.0131102	1302	tags=18%, list=7%, signal=17%	Jup/Tlr4/Fap/Casp4/Scarb1/Sema5a/Nlrp3/Best1/Trem2/Arrb1/Ly96/H2-Q6/Clec4n/Kcna1/Rtp4/H2-Q4/Tlr1/Pglyrp1/Cxcr4/Naip2/Nod2/Grin2b/Cadm1/Kit/Ngfr/Rtp3/Ano1/Dach1
GO:0032412	regulation of monoatomic ion transmembrane transporter activity	174	-0.500213	-1.53921	0.00143228	0.00143228	0.0133482	1805	tags=20%, list=10%, signal=18%	Fxyd3/Scn2b/Akap7/Atp1b1/Plcg2/Dapk1/Ank2/Plcb1/Dmd/Zfas1/Cacng7/Fhl1/Cav1/Trem2/Klhl24/Ctss/Agrn/Mrln/Ednra/Rem1/Nr3c2/Mmp9/Shank3/Atp1b2/Chp2/Prrt1/Abcb1a/Abcc9/Reln/Casq2/Tesc/Kcnj8/Rasgrf2/Pln/Lrrc55
GO:0007259	receptor signaling pathway via JAK-STAT	134	-0.536356	-1.61675	0.0014586	0.0014586	0.0135673	2207	tags=28%, list=12%, signal=25%	Agap2/Fyn/Tyk2/Bcl3/Egf/Prlr/Stat4/Parp9/Lyn/Il7r/Notch1/Stat5a/Ghr/Irf1/Sh2b3/Il10rb/Cav1/Gadd45a/Socs1/Csf1r/Csf2rb2/Stat2/Tslp/Socs3/Hmga2/Parp14/Il10/Il23a/Il15/Csf2rb/Hcls1/Ptprc/Il10ra/Osm/Cd300a/Kit/Pecam1/Stra6
GO:0045833	negative regulation of lipid metabolic process	94	-0.581591	-1.66882	0.00147826	0.00147826	0.0137238	1523	tags=24%, list=9%, signal=22%	Slc27a1/Etfbkmt/Snai2/Bmp5/Endou/Asxl3/Ccdc3/Apobec1/Appl2/Gpld1/Prox1/Fmo1/Il1b/Esr1/Ch25h/Pde8b/Apod/Akr1c14/Fmo2/Sorl1/Pdgfb/Ceacam1/Gimap5
GO:0035584	calcium-mediated signaling using intracellular calcium source	17	-0.799079	-1.75452	0.00148278	0.00148278	0.0137394	770	tags=29%, list=4%, signal=28%	Ntrk2/Selp/Ptprc/Tenm2/Kdr
GO:0060760	positive regulation of response to cytokine stimulus	59	-0.626965	-1.70826	0.00150545	0.00150545	0.0139064	2173	tags=44%, list=12%, signal=39%	Prkn/Ticam2/Axl/Tlr2/Parp9/Ikbke/Usp27x/Trim6/Tlr4/Rbm47/Igtp/Wnt5a/Casp4/Ifih1/Trem2/Irf7/Irgm2/Irgm1/Tslp/Parp14/Crebrf/Laptm5/Nlrc5/Cd74/Cxcr4/Usp29
GO:0060392	negative regulation of SMAD protein signal transduction	18	0.739492	1.89392	0.00150655	0.00150655	0.0139064	1827	tags=50%, list=10%, signal=45%	Ucma/Smad7/Ccn3/Smad6/Pin1/Emilin1/Cilp/Ldlrad4/Eid2
GO:0009070	serine family amino acid biosynthetic process	13	0.791057	1.86555	0.00155207	0.00155207	0.0142993	1097	tags=46%, list=6%, signal=43%	Phgdh/Shmt2/Mthfd1/Psph/Psat1/Dhfr
GO:0006575	cellular modified amino acid metabolic process	156	0.394565	1.49515	0.00156706	0.00156706	0.0143874	2294	tags=24%, list=13%, signal=21%	Dio3/Egln3/Mfsd2a/P4ha2/Ass1/Slc1a2/Mthfd1l/Egln1/Mthfd2/P4ha1/Plod2/Aldh1l2/Shmt2/Mthfd1/Pemt/Plod3/Sardh/Ggt7/P4hb/Gss/Park7/P4ha3/Gart/Prdx4/Dhfr/Ckb/Tyms/Aasdhppt/Atic/Pcmt1/Cpt1b/Hmgn5/Gsto1/Chac1/Gstm6/Slc7a11/Gamt
GO:0001934	positive regulation of protein phosphorylation	578	-0.414664	-1.34588	0.00156802	0.00156802	0.0143874	2048	tags=21%, list=11%, signal=19%	Map2k6/Dgkq/Arrb2/Tspan9/Pxn/Card14/Egf/Prlr/Pink1/Parp9/Atg14/Lyn/Efna1/Met/Vegfc/Dab2/Cd86/Clip3/Adra1a/Bmp4/Mmd/Mtcp1/Atp2b4/Sash1/Limch1/Plcg2/Trim6/Map3k5/Lrp4/Ghr/Wnk4/Il34/Gprc5b/Gfra1/Gpnmb/Cln3/Tlr4/Flcn/Igtp/Rspo1/Map3k1/Notch2/Wnt5a/Tek/Vtn/Cav1/Map3k11/P2rx7/Flt3l/Wdfy2/Trem2/Socs1/Arrb1/Syk/Spry2/Csf1r/Irgm2/Rgma/Agrn/Irgm1/Tslp/Ednra/Cspg4/Peli2/Hmga2/Ogt/Parp14/Ntrk2/Tnfrsf11a/Pik3…
GO:0043542	endothelial cell migration	214	-0.49335	-1.5406	0.00157056	0.00157056	0.0143874	2106	tags=31%, list=12%, signal=28%	Bcas3/Ephb4/Pxn/Stc1/Egf/Adora2b/Efna1/Met/Rin2/Vegfc/Notch1/Nr2f2/Amot/Ptp4a3/Cxcl12/Bmp4/Amotl1/Grn/Patz1/Atp2b4/Sash1/Pik3r2/Stat5a/Tgfbr3/Smoc2/Epha2/Cln3/Snai2/Alox12/Jup/Fap/Vstm4/Wnt5a/Tek/Scarb1/Sema5a/Plxnd1/Gadd45a/Dcn/Glul/Sp100/Meox2/Clec14a/Gpld1/Itgb2/Prox1/Plpp3/Mmrn2/Lpxn/Angpt2/Card10/Cxcr4/Fgf16/Col18a1/Fgf1/Nos3/Gata2/Flt4/Cdh13/Pecam1/Igf2/Kdr/Pdgfb/Ceacam1/Dll4/Cdh5
GO:0019646	aerobic electron transport chain	54	0.5527	1.78628	0.00157596	0.00157596	0.0144035	4754	tags=63%, list=27%, signal=46%	Cox7a1/Cox4i2/Cycs/Cox5a/Dnajc15/Park7/Uqcrq/Cox6a1/Ndufb8/Ndufa8/Cyc1/Ndufb6/Ndufs7/Sdhb/Ndufs3/Ndufs8/Coq9/Ndufb9/Ndufv1/Sdhd/Uqcrc1/Ndufs6/Bdnf/Cox5b/Uqcr11/Ndufv2/Ndufs2/Ndufa10/Uqcrc2/Ndufc2/Cox7b/Sdhaf2/Cox4i1/Ndufs1
GO:0002524	hypersensitivity	24	-0.753323	-1.76711	0.00157828	0.00157828	0.0144035	2486	tags=46%, list=14%, signal=40%	Ccr7/H2-Q7/H2-D1/Fcgr3/H2-Q6/Fcer1g/H2-T23/H2-Q4/Fcgr2b/Fcgr1/Fcgr4
GO:0051896	regulation of phosphatidylinositol 3-kinase/protein kinase B signal transduction	230	-0.48389	-1.52252	0.00160274	0.00160274	0.0145992	2392	tags=27%, list=13%, signal=24%	Rasgrp1/Inpp5k/Mertk/Inpp5e/Fgr/Tspyl5/Thpo/C1qtnf1/Agap2/Fyn/Plxnb1/Insr/Axl/Arrb2/Egf/Cxcl12/Irs1/P2ry12/Aim2/Myoc/Mtm1/Pik3ip1/Epha2/Sh2b3/Flcn/Tmem100/Tek/Fbxl2/Sema5a/Tcf7l2/Ptpn6/Trem2/Dcn/Spry2/Csf1r/Gcnt2/Gdf15/Ntrk2/Sema4d/Igfbp5/Pdgfra/Cx3cr1/Pik3ap1/Rapgef3/Xdh/Selp/Inpp4b/Hcls1/Hmga1/Osm/Akr1c14/Hcst/Cd28/Reln/Flt1/Ngfr/Ramp3/Ppp1r16b/Igf2/Kdr/Pdgfb/Ceacam1
GO:0006414	translational elongation	57	0.52792	1.74522	0.00161635	0.00161635	0.0146948	3828	tags=46%, list=21%, signal=36%	Ptrh1/Eif5a/Eef1g/Eif4e2/Tsfm/Cpeb2/Eef1d/Abce1/Srp9/Eif4a3/Tcf25/Trnt1/Pelo/Mrpl58/Usp10/Usp16/Ascc3/Tufm/Secisbp2/Eef1b2/Efl1/Pstk/Eefsec/Gcn1/Trnau1ap/Ankzf1
GO:0002286	T cell activation involved in immune response	103	-0.561994	-1.63391	0.00161931	0.00161931	0.0146948	1458	tags=22%, list=8%, signal=21%	H2-DMb1/Irf1/Clec4d/Hlx/Nlrp3/Slfn2/Gpr183/Cd46/Lcp1/Fcer1g/Il23a/Clec4e/Batf/Nckap1l/Fgl2/Nfkbid/Cd74/Slc11a1/Itgal/Ly9/Ccr2/H2-DMb2/Lef1
GO:0018108	peptidyl-tyrosine phosphorylation	272	-0.470445	-1.49049	0.00163335	0.00163335	0.0147945	2080	tags=25%, list=12%, signal=22%	Insr/Dgkq/Arrb2/Tspan9/Pxn/Egf/Prlr/Parp9/Lyn/Efna1/Aatk/Clk1/Adra1a/Plcg2/Stat5a/Lrp4/Ghr/Il34/Gprc5b/Irf1/Gfra1/Tlr4/Tek/Vtn/Cav1/Ptpn6/Trem2/Socs1/Syk/Csf1r/Agrn/Tslp/Cspg4/Socs3/Parp14/Fgfr4/Sema4d/Samsn1/Itgb2/Clec4n/Il23a/Il15/Pdgfra/Plpp3/Cd24a/Fgf10/Cd74/Lilrb4a/Cav2/Hcls1/Ptprc/Nod2/Ntf3/Osm/Hck/Kitl/Cd300a/Reln/Ighm/Flt1/Flt4/Kit/Cd36/Abi3/Pecam1/Kdr/Pdgfb
GO:0002887	negative regulation of myeloid leukocyte mediated immunity	11	-0.865293	-1.7368	0.00168482	0.00168482	0.015214	661	tags=45%, list=4%, signal=44%	Spi1/Cx3cr1/Cd84/Ccr2/Cd300a
GO:0007272	ensheathment of neurons	162	-0.518504	-1.58923	0.0016891	0.0016891	0.015214	2223	tags=23%, list=12%, signal=20%	Abca2/Fyn/Wasf3/Adam22/Hexb/Tppp/Lpin1/Tlr2/Ptn/Abcd2/Cntnap1/Psap/Galc/Myoc/Lgi4/Tspan2/Tcf7l2/Rarb/Gpm6b/Clu/Ntrk2/Cd9/Tnfrsf21/Plp1/Jam2/Itgax/Cxcr4/Ntf3/Ncmap/Gjc3/Cmtm8/Tenm4/Erbb3/Sh3tc2/Ngfr/Mall/Cldn5
GO:0008366	axon ensheathment	162	-0.518504	-1.58923	0.0016891	0.0016891	0.015214	2223	tags=23%, list=12%, signal=20%	Abca2/Fyn/Wasf3/Adam22/Hexb/Tppp/Lpin1/Tlr2/Ptn/Abcd2/Cntnap1/Psap/Galc/Myoc/Lgi4/Tspan2/Tcf7l2/Rarb/Gpm6b/Clu/Ntrk2/Cd9/Tnfrsf21/Plp1/Jam2/Itgax/Cxcr4/Ntf3/Ncmap/Gjc3/Cmtm8/Tenm4/Erbb3/Sh3tc2/Ngfr/Mall/Cldn5
GO:0034340	response to type I interferon	62	-0.620815	-1.70413	0.00170882	0.00170882	0.015363	2304	tags=35%, list=13%, signal=31%	Shfl/Isg15/Tyk2/Ikbke/Ifitm6/Usp27x/Trim6/Rbm47/Wnt5a/Ifih1/Irf7/Oas1a/Stat2/Oas1g/Sp100/Oas1c/Nlrc5/Ifitm1/Ch25h/Usp29/Oas2/Oas3
GO:0006281	DNA repair	555	0.282602	1.21903	0.00171213	0.00171213	0.0153642	4003	tags=31%, list=22%, signal=25%	Ooep/Ier3/Taf10/Ruvbl2/Pclaf/Twist1/Rad23b/Clspn/Mpnd/Sf3b5/Swi5/Prkcg/Park7/Brip1/Cenpx/Gins2/Alkbh2/Mcm5/Polb/Gtf2h4/Fen1/Xrcc6/Chek2/Phf10/Psmd14/Supt20/Ung/Mcm8/Kmt5a/Pold2/Chaf1b/Rfc2/Smarca4/Ddb1/Mcm3/Taf12/Rad18/Cdca5/Ube2n/Fh1/Npm1/Rrm1/Poldip2/Cinp/Apex1/Vcp/Rnaseh2c/Stub1/Tex264/Hmgn1/Ddx1/Supt3/Rfc5/Smarca5/Eya2/Rps3/Bcl7c/Ercc1/Chaf1a/Mcm6/Trip13/Ticrr/Taf5/Eny2/Ube2a/Nucks1/Sfpq/Pold…
GO:0007264	small GTPase-mediated signal transduction	412	-0.434004	-1.40137	0.00172044	0.00172044	0.0154102	2490	tags=24%, list=14%, signal=21%	Nrp1/Aif1/Lpar6/Rap1gap/Rasgrp1/Dock11/Stard13/Rasal3/Lipa/Ralgapa2/Arhgap24/Vangl2/Ralgapa1/Ophn1/Plxnb1/Cgnl1/Dennd4c/Rasgef1b/Stard8/Sipa1l3/Eps8/Arfgef3/Arhgdib/Met/Notch1/Amot/Adra1a/Cyth3/Ralgps2/Itpkb/Itga3/Dock10/Agtr1a/Dynlt1a/Dynlt1b/Myoc/Dynlt1c/Dok4/Lrp4/Rnd1/Arhgap18/Rhobtb1/Flcn/Syngap1/Sipa1/Psd/Notch2/Dok2/Elmo1/Tek/Mcf2l/Ralgds/Ntn1/Shtn1/Rapgef4/Chn1/Arrb1/Arhgap19/Spry2/Scai/Sp…
GO:0090151	establishment of protein localization to mitochondrial membrane	25	0.697938	1.95915	0.00173877	0.00173877	0.0155456	3519	tags=72%, list=20%, signal=58%	Tomm40/Hsp90aa1/Timm10/Cox18/Hspa4/Timm13/Timm9/Moap1/Samm50/Timm22/Bax/Pdcd5/Tomm70a/Mtch1/Mtch2/Tomm22/Ndufa13/Timm29
GO:0099024	plasma membrane invagination	59	-0.62263	-1.69645	0.0017704	0.0017704	0.0157897	2238	tags=36%, list=13%, signal=31%	Snx33/Stap1/Gulp1/Gsn/Plcg2/Fcgr3/Elmo1/Bin2/Trem2/Msr1/Appl2/Fcer1g/Itgb2/Nckap1l/Fcgr2b/Abca1/Arhgap25/Fcgr1/Cd300a/Gata2/Cd36
GO:0051092	positive regulation of NF-kappaB transcription factor activity	122	-0.538279	-1.60458	0.0017726	0.0017726	0.0157897	2093	tags=28%, list=12%, signal=25%	Ticam2/Trim5/Rps6ka5/Card14/Traf5/Tlr2/Trim14/Plcg2/Trim6/Aim2/Trim25/Tgfbr3/Trim12c/Trim30d/Tlr4/Wnt5a/Trim12a/Trim21/Tlr3/Nlrp3/Eda/Ror1/Traf1/Clu/Prkch/Trim30a/Tnfrsf11a/Trim34a/Il1b/Card11/Nod2/Cd84/Eda2r/Cd36
GO:1990542	mitochondrial transmembrane transport	86	0.469213	1.62749	0.00178859	0.00178859	0.0158818	4282	tags=44%, list=24%, signal=34%	Slc1a3/Tomm40/Hspd1/Grpel1/Timm17a/Slc25a5/Hif1a/Slc25a4/Timm23/Dnajc15/Slc25a38/Timm50/Fxn/Dnlz/Mrpl18/Mcub/Mpc1/Timm17b/Vdac1/Tomm20/Tomm70a/Smdt1/Aifm1/Slc25a33/Slc25a32/Slc25a1/Mpc2/Sfxn1/Slc25a3/Pam16/Slc25a16/Ccdc51/Dnajc19/Maip1/Slc25a28/Afg3l2/Letm1/Micu2
GO:0009206	purine ribonucleoside triphosphate biosynthetic process	82	0.467262	1.60248	0.00178951	0.00178951	0.0158818	4240	tags=56%, list=24%, signal=43%	Eno1/Eno1b/Aldoa/Nme1/Nme2/Ndufab1/Atpsckmt/Impdh1/Nudt2/Vcp/Ndufb8/Ndufa8/Ndufb10/Ndufb6/Impdh2/Map2k1/Ndufs7/Sdhb/Ndufs3/Ndufs8/Ndufa11/Ndufs5/Ndufs4/Parp1/Nme6/Ndufb9/Ndufb7/Ndufv1/Sdhd/Ndufb11/Ndufs6/Ndufb2/Stoml2/Ndufa13/Dnajc30/Myc/Ndufa9/Ndufv3/Ndufv2/Ndufs2/Ndufa12/Ndufa5/Ndufa10/Ndufb4/Ndufc2/Ndufc1
GO:1904645	response to amyloid-beta	37	-0.692954	-1.76044	0.00181944	0.00181944	0.0161178	2446	tags=32%, list=14%, signal=28%	Cacna1b/Fyn/Gja1/Mmp2/Tlr4/Trem2/Mmp9/Fcgr2b/Itga4/Ngfr/Cd36/Ramp3
GO:0009163	nucleoside biosynthetic process	13	0.786098	1.85386	0.00184083	0.00184083	0.0162409	2468	tags=62%, list=14%, signal=53%	Dctd/Ak1/Ada/Mtap/Dtymk/Pgm2/Aprt/Dnph1
GO:0034404	nucleobase-containing small molecule biosynthetic process	13	0.786098	1.85386	0.00184083	0.00184083	0.0162409	2468	tags=62%, list=14%, signal=53%	Dctd/Ak1/Ada/Mtap/Dtymk/Pgm2/Aprt/Dnph1
GO:0045047	protein targeting to ER	41	0.598873	1.88142	0.00184341	0.00184341	0.0162409	4019	tags=56%, list=23%, signal=44%	Hspa5/Ubl4a/Srprb/Sec61b/Spcs2/Sec61a1/Srp9/Srp72/Arxes2/Srp19/Spcs1/Spcs3/Arxes1/Sec63/Sec61g/Edem1/Bag6/Srp14/Sgta/Ssr3/Herpud1/Folr1/Tram1
GO:0045333	cellular respiration	200	0.380591	1.50455	0.00187778	0.00187778	0.0165136	4277	tags=48%, list=24%, signal=37%	Bnip3/Ak4/Cox7a1/Slc1a3/Cox4i2/Cisd1/Prelid1/Shmt2/Cycs/Nr4a3/Mybbp1a/Hif1a/Gadd45gip1/Mdh2/Cox5a/Slc25a25/Dnajc15/Ndufab1/Park7/Uqcrq/Fxn/Atpsckmt/Arl2/Uqcc2/Mtfr1/Cox6a1/Suclg1/Sco2/Fh1/Vcp/Ndufb8/Bax/Ndufa8/Ndufb10/Adsl/Etfb/Cyc1/Ndufb6/Ndufs7/Chchd2/Idh2/Acly/Sdhb/Ndufs3/Slc25a33/Ndufs8/Cdk1/Coq9/Ndufa11/Ndufs5/Mdh1/Ndufs4/Lyrm7/Ndufb9/Ndufb7/Ndufv1/Cox10/Idh3a/Mtch2/Sdhd/Mrps36/Ndufb11/Dlat/…
GO:0031577	spindle checkpoint signaling	50	0.571528	1.8328	0.00190062	0.00190062	0.0166707	4818	tags=58%, list=27%, signal=42%	Anapc15/Spc24/Stil/Bub1/Diaph3/Cdk5rap2/Birc5/Tpr/Trip13/Zwilch/Spdl1/Zwint/Spc25/Hsf1/Plk1/Incenp/Aurkb/Cdca8/Pcid2/Klhl22/Mad2l1bp/Dync1li1/Aurka/Ik/Mtbp/Zw10/Kntc1/Haspin/Bub3
GO:0000154	rRNA modification	28	0.653113	1.85815	0.00190252	0.00190252	0.0166707	1912	tags=39%, list=11%, signal=35%	Nhp2/Nat10/Ftsj3/Fbl/Gar1/Bud23/Nop2/Dimt1/Dkc1/Tsr3/Nop10
GO:0006334	nucleosome assembly	48	0.558895	1.78795	0.00191318	0.00191318	0.0167337	3654	tags=54%, list=20%, signal=43%	Nasp/Grwd1/Anp32b/Spty2d1/Pole3/Chaf1b/Smarca4/Sox9/Asf1b/Npm1/Baz1a/Nap1l4/Smarca5/Dnajc9/Smyd3/Chaf1a/Sart3/Ssrp1/Set/Brd2/Nap1l1/Tspyl2/Nap1l5/Hat1/Mcm2/Chrac1
GO:0044282	small molecule catabolic process	283	0.324935	1.34208	0.00192345	0.00192345	0.0167932	1098	tags=14%, list=6%, signal=13%	Adipoq/Slc16a3/Eno1/Pgk1/Eno1b/Pfkl/Mfsd2a/Ddah1/Tpi1/Ldha/Pkm/Gapdh/Gale/Pdxp/Aldoa/Gck/Galk1/Bcat1/Cda/Gcat/Aldh1l2/Gpi1/Gcsh/Sesn2/Acot7/Nudt19/Dbi/Tysnd1/Twist1/Ada/Sardh/Cnr1/Acot4/Oaz1/Dera/Park7/Pfkp/Oat/Cyp26b1
GO:0061756	leukocyte adhesion to vascular endothelial cell	45	-0.664239	-1.74307	0.00195471	0.00195471	0.0170354	876	tags=22%, list=5%, signal=21%	Selplg/Itgb7/Sele/Itgb2/Cx3cr1/Selp/Jam2/Itga4/Ccr2/Ptafr
GO:0000463	maturation of LSU-rRNA from tricistronic rRNA transcript (SSU-rRNA, 5.8S rRNA, LSU-rRNA)	17	0.728145	1.8524	0.00196277	0.00196277	0.0170748	3500	tags=76%, list=20%, signal=62%	Bop1/Ftsj3/Znhit6/Rpf2/Rpl7l1/Pes1/Npm1/Wdr12/Nol9/Ddx18/Nifk/Gtpbp4/Znhit3
GO:0070830	bicellular tight junction assembly	57	-0.624434	-1.70038	0.00199303	0.00199303	0.0172523	1616	tags=21%, list=9%, signal=19%	Cldn34c1/Epha2/Snai2/Ramp2/Prkch/Cldn1/Cldn2/Pecam1/F11r/Cdh5/Cldn5/Esam
GO:0002883	regulation of hypersensitivity	21	-0.776255	-1.76324	0.0019932	0.0019932	0.0172523	2486	tags=48%, list=14%, signal=41%	Ccr7/H2-Q7/H2-D1/Fcgr3/H2-Q6/Fcer1g/H2-T23/H2-Q4/Fcgr2b/Fcgr1
GO:0170036	import into the mitochondrion	47	0.563474	1.7914	0.00199388	0.00199388	0.0172523	4282	tags=55%, list=24%, signal=42%	Tomm40/Grpel1/Timm17a/Hif1a/Timm23/Dnajc15/Slc25a38/Timm50/Fxn/Dnlz/Mrpl18/Mcub/Timm17b/Vdac1/Tomm20/Tomm70a/Smdt1/Slc25a33/Slc25a32/Sfxn1/Pam16/Dnajc19/Maip1/Slc25a28/Afg3l2/Micu2
GO:0071346	cellular response to type II interferon	108	-0.551226	-1.62169	0.00200241	0.00200241	0.0172953	1982	tags=31%, list=11%, signal=28%	Rab43/Tlr2/Parp9/Gsn/Xcl1/Dapk1/Irf1/Tlr4/Igtp/Rab20/Ccl4/Mrc1/Ccl3/Pde12/Irgm2/Irgm1/Stxbp2/Parp14/H2-Ab1/Ccl8/Gbp7/Nlrc5/Gbp2/Nos2/Irf8/Gbp3/Ccl6/Ccl11/Ccl12/Gbp6/Gbp9/Gbp5/Gbp8/Gbp4
GO:0032689	negative regulation of type II interferon production	31	-0.705483	-1.72806	0.00201042	0.00201042	0.0173126	1559	tags=39%, list=9%, signal=35%	Axl/Il33/Vsir/Tlr4/Irgm1/Laptm5/Il10/Cd274/Lilrb4a/Pglyrp1/Nod2/Gimap5
GO:0008015	blood circulation	437	-0.433081	-1.4028	0.00201157	0.00201157	0.0173126	2048	tags=22%, list=11%, signal=20%	Map2k6/Shc1/Stc1/Gaa/Slc23a2/Npr2/Adora2b/Pde3a/Met/Gsn/Gja1/Vegfc/Nr2f2/Amot/Ptp4a3/Itga1/Adra1a/Uty/Scn2b/Smad3/Foxc1/Mmp2/Ttn/Agtr1a/Atp2b4/Thrb/Atp1b1/Cysltr1/Mgll/Wnk4/Tgfbr3/Ank2/Ptgs1/Dmd/Zfas1/Kcnj2/Jup/Akap12/Dll1/Fli1/Vstm4/C3ar1/Tnni2/Dmpk/Ncf2/Ccl4/Cav1/Actc1/Kcnh2/Agrn/Ramp2/Ednra/Npr1/Enpep/Epas1/Nr3c2/Pde2a/Cd38/Npy1r/Ahr/Camk2n1/Cacna1h/Ptpro/Nos2/Ace/Cxcr4/Hopx/Gucy1a1/Tbxas1/Npp…
GO:0071174	mitotic spindle checkpoint signaling	46	0.561543	1.76581	0.00202721	0.00202721	0.0174161	4818	tags=57%, list=27%, signal=41%	Anapc15/Spc24/Stil/Bub1/Cdk5rap2/Birc5/Tpr/Trip13/Zwilch/Spdl1/Zwint/Spc25/Plk1/Incenp/Aurkb/Cdca8/Pcid2/Klhl22/Mad2l1bp/Dync1li1/Ik/Mtbp/Zw10/Kntc1/Haspin/Bub3
GO:0006465	signal peptide processing	15	0.745932	1.83306	0.00204406	0.00204406	0.0175298	2470	tags=67%, list=14%, signal=57%	Pcsk5/Spcs2/Sec11c/H13/Arxes2/Parl/Spcs1/Sec11a/Spcs3/Arxes1
GO:0032609	type II interferon production	119	-0.542307	-1.60624	0.0020486	0.0020486	0.0175376	2486	tags=30%, list=14%, signal=26%	Ccr7/Pde4b/H2-Q7/Rasgrp1/H2-D1/Isg15/Tyk2/Ticam2/Axl/Bcl3/Klrk1/Il33/Vsir/Tlr4/Wnt5a/Tlr3/Irgm1/Tnfsf9/H2-Q6/Laptm5/Il10/Il23a/Cd274/Il1b/H2-Q4/Cd14/Lilrb4a/Pglyrp1/Slc11a1/Irf8/Nod2/Cd2/Tlr7/Ccr2/Sash3/Gimap5
GO:0007098	centrosome cycle	128	0.412933	1.54503	0.00205949	0.00205949	0.0175997	4187	tags=35%, list=23%, signal=27%	Tuba1a/Haus7/Plk2/Nat10/Nubp1/Ranbp1/Sac3d1/Pclaf/Stil/Haus8/Pde4dip/Uxt/Ccnf/Arl2/Plk4/Cdk5rap2/Npm1/Cdk11b/Azin1/Haus6/Nsfl1c/Ccnl1/Ppp1r35/BC034090/Sirt1/Rock2/Brca1/Cep295nl/Nup62/Ccdc42/Plk1/Kat2a/Chmp2a/Haus1/Pdcd6ip/Mark4/Haus2/Chek1/Pard6a/D7Ertd443e/Uvrag/Ndel1/Crocc/Bnip2/Chmp1a
GO:0009225	nucleotide-sugar metabolic process	32	0.631575	1.88294	0.00207163	0.00207163	0.0176722	3490	tags=59%, list=20%, signal=48%	Cmah/Csgalnact1/Gmppb/Gmds/Guk1/Uap1/Gnpnat1/Pgm3/Cmas/Gfpt2/Uxs1/Ugp2/Ugdh/Mgat1/Gne/Pmm1/Tgds/Gfpt1/Mpi
GO:0045766	positive regulation of angiogenesis	161	-0.502666	-1.54142	0.00208273	0.00208273	0.0177122	1722	tags=25%, list=10%, signal=23%	Grn/Agtr1a/Sash1/Emilin2/Cysltr1/Smoc2/Jup/Dll1/C3ar1/Wnt5a/Tek/Tlr3/Sema5a/Cd34/Ramp2/Hmga2/Pik3r6/Itgb2/Il10/Cx3cr1/Il1b/Rapgef3/C5ar1/Angpt2/Itgax/Mmp9/Cxcr4/Fgf1/Nos3/Prkcb/Cybb/Ccl11/Gata2/Flt1/Aqp1/Igf2/Kdr/Aplnr/Cdh5/Tie1
GO:0000413	protein peptidyl-prolyl isomerization	24	0.682859	1.89407	0.00208365	0.00208365	0.0177122	4840	tags=75%, list=27%, signal=55%	Fkbp11/Ppil1/Pin1/Fkbp4/Ppia/Ppib/Fkbp2/Fkbp1a/Ppih/Ppie/Ppid/Ppil3/Fkbp1b/Ppig/Ppil4/Cwc27/Fkbp5/Ranbp2
GO:1901137	carbohydrate derivative biosynthetic process	528	0.288299	1.23557	0.00209647	0.00209647	0.0177604	3755	tags=34%, list=21%, signal=28%	Eno1/Pgk1/Eno1b/Gal3st1/Hbegf/Tpi1/Pgam1/Gapdh/Aldoa/Pdk1/Nme1/Csgalnact1/Gmppb/Cda/Uck2/St6galnac5/Gmds/Galnt16/Guk1/Hs6st1/Nme2/Nfkb1/Hs3st3b1/Bace2/Uap1/Acot7/Dctd/Mthfd1/Ampd1/Ugcg/Ak1/Pcx/Mlec/Pdk3/Ada/Dad1/Ostc/Eogt/Plod3/Mtap/Mdh2/Ak2/Dut/St3gal5/Galnt17/Gnpnat1/Ndufab1/Cad/Pgm3/Ddost/Gart/Rpn1/Large2/Alg5/Tkt/Nus1/Cmas/Alg1/Ccl19/Gfpt2/Dtymk/Tyms/Umps/Dolpp1/Gmpr2/Atpsckmt/Rpn2/Mpc1/Chst1…
GO:0002711	positive regulation of T cell mediated immunity	60	-0.61785	-1.6896	0.00209665	0.00209665	0.0177604	2692	tags=38%, list=15%, signal=33%	Tap2/Mr1/Malt1/H2-Q7/H2-D1/Hfe/B2m/Xcl1/Dennd1b/Cd55/P2rx7/Nlrp3/H2-Q6/H2-T23/Il23a/H2-T24/Il1b/Cd24a/H2-Q4/Mill2/Ptprc/Rsad2/Sash3
GO:0045582	positive regulation of T cell differentiation	113	-0.543728	-1.60344	0.00212614	0.00212614	0.0179787	2574	tags=31%, list=14%, signal=27%	Malt1/Stat5b/Ccr7/Rasgrp1/Zmiz1/Vnn1/Gli3/Il7r/Smarca2/Itpkb/Stat5a/Vsir/Irf1/H2-DMa/Hlx/Nlrp3/Sox13/Socs1/Syk/Tnfsf9/Cd46/Pik3r6/Il23a/Nckap1l/Il2rg/Nfkbid/Cd74/Lilrb4a/Ptprc/H2-Aa/Ccr2/Sash3/Cd83/Lef1/Gimap5
GO:0016126	sterol biosynthetic process	50	0.56704	1.8184	0.0021353	0.0021353	0.018001	1951	tags=46%, list=11%, signal=41%	Fdps/Sqle/Dhcr24/Idi1/Cyp51/Msmo1/Hmgcs1/Mvd/Fdft1/Insig1/Mvk/Hmgcr/Hsd17b7/Ebp/Apoa1/Lss/Pmvk/Srebf2/Dhcr7/Erg28/Tm7sf2/Cyb5r3/Scp2
GO:0031342	negative regulation of cell killing	35	-0.700815	-1.75708	0.00213623	0.00213623	0.018001	2396	tags=43%, list=13%, signal=37%	H2-Q7/H2-D1/Clec2d/Arrb2/Il7r/Tap1/H2-Q6/H2-T23/Cx3cr1/Nckap1l/H2-Q4/Ptprc/Klrd1/Igf2/Ceacam1
GO:0001788	antibody-dependent cellular cytotoxicity	14	-0.82922	-1.74237	0.00217578	0.00217578	0.0183025	2396	tags=64%, list=13%, signal=56%	H2-Q7/H2-D1/Fcgr3/H2-Q6/H2-T23/H2-Q4/Fcgr2b/Fcgr1/Fcgr4
GO:1901605	alpha-amino acid metabolic process	165	0.393322	1.52744	0.0021893	0.0021893	0.0183842	2438	tags=32%, list=14%, signal=27%	Egln3/Ddah1/P4ha2/Ass1/Egln1/Bcat1/Asns/P4ha1/Plod2/Odc1/Gcat/Phgdh/Gcsh/Shmt2/Mthfd1/Pemt/Psph/Comt/Plod3/Sardh/Mtap/Txnrd1/P4hb/Psat1/Oaz1/Mri1/Park7/P4ha3/Cad/Gart/Oat/Prdx4/Dhfr/Aldh18a1/Pycr2/Gfpt2/Spr/Got1/Aasdhppt/Atf4/Fh1/Pycr1/Pcmt1/Gmps/Bcat2/Fah/Asrgl1/Azin1/Slc7a11/Gamt/Got2/Kyat3
GO:0072599	establishment of protein localization to endoplasmic reticulum	44	0.592505	1.87631	0.00219829	0.00219829	0.0184277	4019	tags=57%, list=23%, signal=44%	Hspa5/Ubl4a/Srprb/Sec61b/Spcs2/Sec61a1/Srp9/Srp72/Arxes2/Srp19/Spcs1/Spcs3/Arxes1/Sec63/Rab3gap2/Sec61g/Edem1/Bag6/Srp14/Sgta/Ssr3/Herpud1/Rab10/Folr1/Tram1
GO:0060627	regulation of vesicle-mediated transport	512	-0.421272	-1.36337	0.00223489	0.00223489	0.0187021	2968	tags=25%, list=17%, signal=22%	Pros1/Rab15/Atp13a2/Stam/Myo18a/Itgb3/Tbc1d5/Actn2/Rab5b/Grik5/Epha3/Bcl2l1/Bicd1/Git2/Sdcbp/Ston2/Pip5k1c/Clasp2/Cfp/Alms1/Ccr7/Rab27a/Cacna1b/Rap1gap/Nr1h3/Mertk/Fgr/Snx33/Abca2/Dgkd/Zdhhc2/Prkn/Ophn1/Stap1/Insr/C2cd5/Hfe/Axl/Dgkq/Arrb2/Synj1/Neu3/Egf/B2m/Tlr2/Adora2b/Tgm2/Arhgap21/Lyn/Stx1b/Notch1/Dab2/Fbxl20/Clip3/Prrt2/Sv2c/Ppt1/Sh3gl3/Ppfia2/Plcg2/Ehd2/Fcgr3/Scrn1/Cplx2/Gab2/Tbc1d4/Cln3/Pot…
GO:0002244	hematopoietic progenitor cell differentiation	148	-0.515883	-1.56401	0.00223887	0.00223887	0.018703	2660	tags=28%, list=15%, signal=24%	Zfp784/Eml1/Sp1/Ston2/Cdk6/Atf2/3830403N18Rik/Lipa/Samd9l/Sp3/Sipa1l3/Lyn/Atf7/Kcp/Notch1/Bmp4/Foxc1/Apobec3/Zfp36/Herc6/Dhtkd1/Sh2b3/Rbm47/Flcn/Ptpn6/Cebpd/Thsd1/Tnfrsf13b/Arl11/Spi1/Pdgfra/Batf/Hmga1/Tifab/Ptprc/Pld4/Kitl/Gata2/Flt1/Kit/Kdr/Tcf15
GO:0003272	endocardial cushion formation	25	-0.730236	-1.72387	0.00225274	0.00225274	0.0187864	1845	tags=32%, list=10%, signal=29%	Notch1/Snai2/Bmp5/Tmem100/Robo2/Tbx2/Bmp7/Aplnr
GO:0032494	response to peptidoglycan	14	-0.828474	-1.7408	0.00226581	0.00226581	0.0188385	1947	tags=50%, list=11%, signal=45%	Tlr2/Irf5/Nlrp3/Trem2/Defb25/C5ar1/Nod2
GO:2001212	regulation of vasculogenesis	16	-0.81363	-1.76474	0.00226677	0.00226677	0.0188385	1231	tags=50%, list=7%, signal=47%	Rin2/Tmem100/Cd34/Ramp2/Asb4/Xdh/Kdr/Ceacam1
GO:0001914	regulation of T cell mediated cytotoxicity	38	-0.671349	-1.71432	0.00227441	0.00227441	0.0188696	2692	tags=45%, list=15%, signal=38%	Tap2/Mr1/H2-Q7/H2-D1/Hfe/B2m/Il7r/P2rx7/H2-Q6/H2-T23/Il23a/H2-T24/Nckap1l/H2-Q4/Mill2/Ptprc/Klrd1
GO:0016051	carbohydrate biosynthetic process	180	0.387289	1.51538	0.00228173	0.00228173	0.0188979	2644	tags=32%, list=15%, signal=27%	Adipoq/Aldoc/Eno1/Pgk1/Tpi1/Pgam1/Erfe/Rbp4/Gapdh/Gck/Dgat2/Pgp/Gys1/Csgalnact1/St6galnac5/C1qtnf3/Myh9/Pgm1/Gpi1/G6pc3/Nfkb1/Sesn2/Slc39a14/Pcx/Nans/Enpp1/Hif1a/Mdh2/Nnmt/Gbe1/Supt20/Got1/Pgd/Chst12/Nr1d1/Ddb1/Serpina12/Ugp2/Atf4/Slc25a11/Pgm2/Pth1r/Wdr5/Gper1/Ppp1r3d/Gsto1/Atf3/Mgat2/Ppp1ca/Akr1a1/Mdh1/Per2/Pask/Parp1/Ptpn2/Ext1/Sirt1
GO:0035023	regulation of Rho protein signal transduction	85	-0.587643	-1.68089	0.00229766	0.00229766	0.0189973	2490	tags=36%, list=14%, signal=32%	Nrp1/Lpar6/Stard13/Ophn1/Plxnb1/Stard8/Eps8/Arhgdib/Met/Adra1a/Itga3/Myoc/Flcn/Tek/Mcf2l/Arrb1/Scai/Tagap/Arhgap20/Sema4d/Lpar4/Gpr65/Arhgef3/P2ry10/Abca1/Gpr4/Ripor2/Ngfr/Adgrg1/Rasip1/F11r
GO:0043301	negative regulation of leukocyte degranulation	12	-0.852058	-1.73147	0.00232583	0.00232583	0.0191974	661	tags=42%, list=4%, signal=40%	Spi1/Nckap1l/Cd84/Ccr2/Cd300a
GO:0045123	cellular extravasation	66	-0.598847	-1.67071	0.00236746	0.00236746	0.0195077	876	tags=24%, list=5%, signal=23%	Selplg/Itgb7/Sele/Itgb2/Cx3cr1/Lyve1/Selp/Jam2/Itga4/Itgal/Ccr2/Plvap/Ptafr/Ripor2/Pecam1/F11r
GO:2000514	regulation of CD4-positive, alpha-beta T cell activation	73	-0.594718	-1.66649	0.00237649	0.00237649	0.0195488	1801	tags=29%, list=10%, signal=26%	Twsg1/Xcl1/Vsir/Irf1/Cd55/Hlx/Nlrp3/Socs1/Irgm1/Il23a/Cd274/Nckap1l/Cd24a/Il2rg/Card11/Nfkbid/Ccr2/Sash3/Cd83/Cd28/Gimap5
GO:0001709	cell fate determination	29	-0.725977	-1.76237	0.00245775	0.00245775	0.0201829	1772	tags=38%, list=10%, signal=34%	Bmp4/Ebf2/Myod1/Notch2/Ptch1/Tbx2/Prox1/Ntf3/Jag2/Ptch2/Gata2
GO:0045727	positive regulation of translation	123	0.412474	1.51583	0.00248653	0.00248653	0.0203847	3047	tags=34%, list=17%, signal=29%	Thbs1/Pkm/Eif5a/Eif6/Serp1/Nat10/Ybx1/Prmt1/Dnajc3/C1qbp/Rcc1l/Coa3/Rps6kb1/Uqcc2/Mpv17l2/Ptbp1/Eif2b5/Eif4a3/Cdk4/Larp1/Prr16/Npm1/Eif3d/Eif4g1/Rbm3/Samd4/Hnrnpu/Eif4g2/Cnbp/Upf3a/Syncrip/Tarbp2/Abcf1/Hnrnpd/Usp16/Larp4/Rpusd3/Secisbp2/Ssb/Habp4/Rps27l/Mrps27
GO:0001787	natural killer cell proliferation	23	-0.732079	-1.70464	0.00253738	0.00253738	0.0207664	2542	tags=43%, list=14%, signal=37%	Stat5b/H2-Q7/H2-D1/Tyk2/Flt3l/H2-Q6/H2-T23/Il23a/Il15/H2-Q4
GO:0046653	tetrahydrofolate metabolic process	19	0.70382	1.81952	0.00256548	0.00256548	0.0209608	1485	tags=58%, list=8%, signal=53%	Mthfd1l/Mthfd2/Aldh1l2/Shmt2/Mthfd1/Sardh/Gart/Dhfr/Tyms/Aasdhppt/Atic
GO:0055074	calcium ion homeostasis	281	-0.45629	-1.4462	0.00257244	0.00257244	0.0209823	1981	tags=20%, list=11%, signal=18%	Stc1/Tgm2/Lyn/Ubash3b/Mcoln1/Xcl1/Atp2b4/Atp1b1/Plcg2/Wnk4/Pml/Ank2/Itpr3/Plcb1/Dmd/Grina/Cln3/Efhc1/Wnt5a/Dmpk/Tmem64/Cav1/P2rx7/Ptpn6/Cxcl9/Cxcl10/Pthlh/Ednra/Slc24a5/Tmtc2/Ccl8/Slc8b1/Slc25a27/Npy1r/Coro1a/Atp2a1/Cav2/Inpp4b/Ptprc/Ccr5/Grin2b/Nppc/Ccr2/Prkcb/Chd7/Clec4b1/Atp2a3/Casq2/Trpc3/Edn3/Alpl/P2ry1/Kdr/Pln/Aplnr/Cdh5
GO:0002923	regulation of humoral immune response mediated by circulating immunoglobulin	15	-0.814985	-1.73527	0.002588	0.002588	0.0210737	1144	tags=53%, list=6%, signal=50%	Cd55/Ptpn6/Trem2/Cd46/Ptprc/Fcgr2b/Nod2/Gimap5
GO:0050727	regulation of inflammatory response	313	-0.44451	-1.41766	0.00260133	0.00260133	0.0211466	1947	tags=22%, list=11%, signal=20%	Tlr2/Adora2b/Lyn/Acp5/Xcl1/Grn/Smad3/Sbno2/Nmi/Plcg2/Il33/Aim2/Stat5a/Dagla/Mgll/Gprc5b/Fcgr3/Zfp36/Cd200/Adamts12/Tlr4/Igtp/Ncf1/Wnt5a/Casp4/Fbxl2/Nlrp3/Ccl3/Ptpn6/Trem2/Csf1r/Ctss/Irgm2/Irgm1/Tslp/Enpp3/Socs3/Aoah/H2-Q6/Fcer1g/Tnfrsf11a/H2-T23/Pde2a/Il10/Cx3cr1/Pik3ap1/Ahr/Camk2n1/Il1b/Esr1/Cd24a/H2-Q4/Lpl/Tnfaip8l2/Pglyrp1/Il16/Wfdc1/Fcgr2b/Ccr5/Nod2/Il10ra/Gpr4/Osm/Ccr2/Fcgr1/Fabp4/Cd28/Ednrb…
GO:0042475	odontogenesis of dentin-containing tooth	66	-0.595158	-1.66042	0.00264874	0.00264874	0.0214958	1772	tags=27%, list=10%, signal=25%	Bmp4/Foxc1/Lrp4/Gli2/Dll1/Tcf7l2/Eda/Bcl2l11/Pdgfra/Acvr2b/Wnt6/Fgf10/Jag2/Bmp7/Lef1/Ngfr/Lama5/Itga6
GO:1901292	nucleoside phosphate catabolic process	157	0.39783	1.50681	0.00267933	0.00267933	0.0217077	1079	tags=21%, list=6%, signal=20%	Aldoc/Eno1/Pgk1/Eno1b/Pfkl/Slc2a6/Tpi1/Pgam1/Pkm/Gapdh/Gale/Aldoa/Gck/Galk1/Htr2a/Cda/Ier3/Eif6/Nt5c/Gpi1/Entpd6/Acot7/Nudt19/Dctpp1/Adpgk/Enpp1/Hif1a/Ada/Ddit4/Dut/Dera/Nudt18/Pfkp
GO:0042590	antigen processing and presentation of exogenous peptide antigen via MHC class I	14	-0.825572	-1.7347	0.00271597	0.00271597	0.0219677	2396	tags=71%, list=13%, signal=62%	H2-Q7/H2-D1/Mfsd6/Fcgr3/H2-Q6/Fcer1g/Ifi30/Mpeg1/H2-Q4/Fcgr1
GO:0007339	binding of sperm to zona pellucida	29	0.653544	1.88604	0.0027565	0.0027565	0.0222583	2938	tags=45%, list=16%, signal=38%	Aldoa/Adam1a/Cct3/Cct7/Cct6a/Tcp1/Cct2/Cct8/Cct5/Atp8b3/Vdac2/Cct4/Adam1b
GO:0045586	regulation of gamma-delta T cell differentiation	12	-0.848055	-1.72333	0.00277599	0.00277599	0.0222947	1534	tags=58%, list=9%, signal=53%	Stat5a/Sox13/Syk/Nckap1l/Ptprc/Lef1/Gimap5
GO:0046643	regulation of gamma-delta T cell activation	12	-0.848055	-1.72333	0.00277599	0.00277599	0.0222947	1534	tags=58%, list=9%, signal=53%	Stat5a/Sox13/Syk/Nckap1l/Ptprc/Lef1/Gimap5
GO:0034329	cell junction assembly	400	-0.429911	-1.38677	0.00278332	0.00278332	0.0222947	2823	tags=22%, list=16%, signal=19%	Cldn15/Actn2/Gabra3/Tbx5/Epha3/Myo6/Lrrtm3/Mef2c/Mmp14/Actn3/Gja5/Sdcbp/Lzts1/Sorbs1/Amigo1/Camsap3/Clasp2/Nrp1/Ptprd/Epb41l3/Lamc1/Hdac7/Lama3/Zdhhc2/Slitrk6/Ophn1/Plxnb1/Pxn/Sdk2/Tlr2/Gja1/Cntnap1/Slitrk1/Taok2/Tns1/Smad3/Ptprk/Cldn34c1/Lgi2/Limch1/Myoc/Lrp4/Epha2/Snai2/Arhgap6/Jup/Flcn/Psd/Wnt5a/Tek/Cav1/Ntn1/Plxnd1/Agrn/Ramp2/Gpm6b/Efnb3/Ogt/Prkch/Lrrn1/Ntrk2/Cd9/Thsd1/Sema4d/Pcdh17/Il1b/Ptpr…
GO:0006813	potassium ion transport	176	-0.499993	-1.54027	0.00278476	0.00278476	0.0222947	1707	tags=21%, list=10%, signal=19%	Fxyd3/Hbp1/P2ry12/Akap7/Atp1b1/Wnk4/Kcnh3/Ank2/Kcnj2/Fhl1/Slc12a6/Cav1/Kcnq4/Kcnh2/Trem2/Klhl24/Agrn/Slc24a5/Kcnb1/Kcnt2/Nr3c2/Kcna1/Kcnj13/Atp1b2/Nos3/Kcns3/Abcc9/Casq2/Atp1a2/Aqp1/Kcnn3/Edn3/Kcng4/Kcnj8/Kcnc2/Lrrc55/Kcna5
GO:0002474	antigen processing and presentation of peptide antigen via MHC class I	33	-0.689587	-1.71083	0.00278562	0.00278562	0.0222947	2692	tags=58%, list=15%, signal=49%	Tap2/Mr1/Tapbpl/H2-Q7/H2-D1/Hfe/B2m/Mfsd6/Tap1/Fcgr3/H2-Q6/Fcer1g/H2-T23/Ifi30/Mpeg1/H2-T24/H2-Q4/Mill2/Fcgr1
GO:0042119	neutrophil activation	34	-0.697062	-1.73969	0.00278962	0.00278962	0.0222947	1114	tags=35%, list=6%, signal=33%	Grn/Traf3ip2/Syk/Tyrobp/Fcer1g/Spi1/Itgb2/Il15/Il16/Ptafr/Cd300a/Fcgr4
GO:0001822	kidney development	287	-0.451107	-1.43167	0.00279327	0.00279327	0.0222947	1956	tags=23%, list=11%, signal=21%	Tmem67/Osr2/Notch1/Tbc1d32/Bmp4/Itga3/Smad3/Foxc1/Lgr4/Agtr1a/Foxd1/Lrp4/Wnk4/Tns2/Gli2/Dll1/Cys1/Flcn/Tshz3/Notch2/Nid1/Gpc3/C3ar1/Col4a4/Wnt5a/Tek/Traf3ip2/Ptch1/Mtss1/Rdh10/Robo2/Plxnd1/Rarb/Spry1/Bcl2l11/Hoxb7/Ednra/Enpep/Ctns/Notch3/Klhl3/Dchs2/Pdgfra/Ahr/Acvr2b/Ptpro/Cd24a/Prdm1/Wnt6/Cfh/Fgf10/Angpt2/Mmp9/Ace/Cxcr4/Klf15/Fgf1/Cdkn1c/Gpr4/Ednrb/Bmp7/Aqp1/Lama5/Eya1/Pdgfb/Stra6/Agtr2
GO:1903238	positive regulation of leukocyte tethering or rolling	11	-0.856226	-1.7186	0.002808	0.002808	0.0223754	668	tags=45%, list=4%, signal=44%	Sele/Selp/Itga4/Ccr2/Ptafr
GO:0060326	cell chemotaxis	274	-0.458325	-1.45125	0.00293524	0.00293524	0.0233508	1904	tags=27%, list=11%, signal=24%	Lyn/Met/Cxcl14/Ptn/Vegfc/Notch1/Itga1/Cxcl12/Padi2/Xcl1/Mmp2/Agtr1a/Il34/Fcgr3/Smoc2/Nbl1/Epha2/Snai2/C3ar1/Wnt5a/Ccrl2/Slamf9/Bin2/Ccl4/Sema5a/Ccl3/Cxcl9/Syk/Csf1r/Cxcl10/Camk1d/Gpr183/Ednra/Defb25/Ackr4/Ccl8/Fcer1g/Slc8b1/Spi1/Itgb2/Dapk2/Il23a/Pdgfra/Cx3cr1/Coro1a/Il1b/Nckap1l/Ptpro/Cd74/C5ar1/Rac2/Il16/Mmp9/Cxcr4/Ch25h/Fgf16/Ccr5/Nod2/Fgf1/S1pr1/Ccl6/Pla2g7/Ccr2/Ccl11/Ccl12/Ednrb/Lef1/Flt1/Ri…
GO:0009145	purine nucleoside triphosphate biosynthetic process	83	0.466603	1.60436	0.00294026	0.00294026	0.0233524	4240	tags=55%, list=24%, signal=42%	Eno1/Eno1b/Aldoa/Nme1/Nme2/Ndufab1/Atpsckmt/Impdh1/Nudt2/Vcp/Ndufb8/Ndufa8/Ndufb10/Ndufb6/Impdh2/Map2k1/Ndufs7/Sdhb/Ndufs3/Ndufs8/Ndufa11/Ndufs5/Ndufs4/Parp1/Nme6/Ndufb9/Ndufb7/Ndufv1/Sdhd/Ndufb11/Ndufs6/Ndufb2/Stoml2/Ndufa13/Dnajc30/Myc/Ndufa9/Ndufv3/Ndufv2/Ndufs2/Ndufa12/Ndufa5/Ndufa10/Ndufb4/Ndufc2/Ndufc1
GO:0050858	negative regulation of antigen receptor-mediated signaling pathway	24	-0.739306	-1.73423	0.00295525	0.00295525	0.0234329	1033	tags=29%, list=6%, signal=28%	Ptpn6/Ubash3a/Laptm5/Lpxn/Lilrb4a/Cd22/Cd300a
GO:0007606	sensory perception of chemical stimulus	47	-0.649804	-1.72513	0.00296381	0.00296381	0.0234353	3795	tags=36%, list=21%, signal=29%	Pde4a/Asic3/Pde1c/Cngb1/Trpv1/Dmxl2/B3gnt2/Ttc8/Gnas/B2m/Itpr3/Reep2/Rtp4/Lef1/Rtp3/Cd36/Nav2
GO:0050920	regulation of chemotaxis	207	-0.48194	-1.50227	0.00296524	0.00296524	0.0234353	1904	tags=30%, list=11%, signal=27%	Lyn/Met/Cxcl14/Ptn/Vegfc/Notch1/Cxcl12/Padi2/Xcl1/Smad3/P2ry12/Il34/Smoc2/Nbl1/Sema3f/Snai2/C3ar1/Wnt5a/Sema6a/Sema5a/Robo2/Trem2/Sema6b/St6gal1/Csf1r/Agrn/Cxcl10/Camk1d/Gpr183/Ednra/Defb25/Sema6d/Nova2/Slc8b1/Sema4d/Spi1/Sema3g/Dapk2/Il23a/Pdgfra/Cx3cr1/Il1b/Nckap1l/Fgf10/Cd74/C5ar1/Rac2/Angpt2/Il16/Cxcr4/Fgf16/Nod2/Fgf1/Ntf3/S1pr1/Pla2g7/Ccr2/Ripor2/Edn3/Cdh13/Kdr/Pdgfb
GO:0070269	pyroptosis	29	-0.721569	-1.75167	0.00298502	0.00298502	0.0235532	1755	tags=59%, list=10%, signal=53%	Gsdmd/Zeb2/Mefv/Naip5/Casp1/Gsdme/Map3k20/Aim2/Casp4/Trim21/Nlrp3/Trem2/Gbp2/Naip2/Gbp3/Gbp5/Gzma
GO:0022898	regulation of transmembrane transporter activity	182	-0.487651	-1.50326	0.00299131	0.00299131	0.0235643	1805	tags=19%, list=10%, signal=17%	Fxyd3/Scn2b/Akap7/Atp1b1/Plcg2/Dapk1/Ank2/Plcb1/Dmd/Zfas1/Cacng7/Fhl1/Cav1/Trem2/Klhl24/Ctss/Agrn/Mrln/Ednra/Rem1/Nr3c2/Mmp9/Shank3/Atp1b2/Chp2/Prrt1/Abcb1a/Abcc9/Reln/Casq2/Tesc/Kcnj8/Rasgrf2/Pln/Lrrc55
GO:1904894	positive regulation of receptor signaling pathway via STAT	41	-0.664149	-1.70507	0.00300495	0.00300495	0.0236333	2207	tags=37%, list=12%, signal=32%	Agap2/Tyk2/Prlr/Il7r/Notch1/Ghr/Il10rb/Socs1/Tslp/Il10/Il23a/Il10ra/Cd300a/Kit/Stra6
GO:0002885	positive regulation of hypersensitivity	18	-0.786594	-1.75413	0.00300985	0.00300985	0.0236334	2486	tags=50%, list=14%, signal=43%	Ccr7/H2-Q7/H2-D1/Fcgr3/H2-Q6/Fcer1g/H2-T23/H2-Q4/Fcgr1
GO:0086011	membrane repolarization during action potential	14	-0.822804	-1.72889	0.00301607	0.00301607	0.0236439	1306	tags=43%, list=7%, signal=40%	Kcnj2/Cav1/Kcnh2/Kcna1/Kcnj8/Kcna5
GO:0006691	leukotriene metabolic process	17	-0.7818	-1.71658	0.00303807	0.00303807	0.0237778	2554	tags=59%, list=14%, signal=50%	Abcc10/Dpep1/Alox5ap/Tlr2/Ggt5/Cyp4f13/Tlr4/Ncf1/Syk/Cyp4f18
GO:2000561	regulation of CD4-positive, alpha-beta T cell proliferation	24	-0.736139	-1.7268	0.00306369	0.00306369	0.0238839	1801	tags=42%, list=10%, signal=38%	Prkcq/Twsg1/Xcl1/Vsir/Cd55/Irgm1/Cd274/Cd24a/Card11/Cd28
GO:0007596	blood coagulation	144	-0.506008	-1.53242	0.00307234	0.00307234	0.0238839	2561	tags=29%, list=14%, signal=25%	Pip5k1c/Prkcq/Rab27a/Mertk/Tspan8/C1qtnf1/Gnas/Enpp4/Axl/Tspan9/Serping1/Fbln1/Lyn/Ubash3b/P2ry12/Pear1/Emilin2/Alox12/Sh2b3/Tlr4/Vtn/Cav1/Ptpn6/Fermt3/Syk/Entpd2/Thbd/Cd9/Fcer1g/Tec/Pdgfra/Plek/Selp/Cfh/Lilrb4a/Entpd1/Cd36/P2ry1/F11r/Pdgfb/Ceacam1/Vwf
GO:0002716	negative regulation of natural killer cell mediated immunity	27	-0.735179	-1.76676	0.00308182	0.00308182	0.0238839	2692	tags=44%, list=15%, signal=38%	Tap2/H2-Q7/H2-D1/Clec2d/Arrb2/Tap1/H2-Q6/H2-T23/H2-Q4/Klrd1/Igf2/Ceacam1
GO:0045953	negative regulation of natural killer cell mediated cytotoxicity	27	-0.735179	-1.76676	0.00308182	0.00308182	0.0238839	2692	tags=44%, list=15%, signal=38%	Tap2/H2-Q7/H2-D1/Clec2d/Arrb2/Tap1/H2-Q6/H2-T23/H2-Q4/Klrd1/Igf2/Ceacam1
GO:1901381	positive regulation of potassium ion transmembrane transport	29	-0.720121	-1.74816	0.00309069	0.00309069	0.0238839	1633	tags=38%, list=9%, signal=35%	Akap7/Atp1b1/Wnk4/Ank2/Kcnj2/Kcnh2/Trem2/Atp1b2/Edn3/Kcnc2/Lrrc55
GO:0050901	leukocyte tethering or rolling	29	-0.720103	-1.74811	0.00309069	0.00309069	0.0238839	876	tags=34%, list=5%, signal=33%	Cxcl12/Selplg/Itgb7/Sele/Cx3cr1/Selp/Jam2/Itga4/Ccr2/Ptafr
GO:0043129	surfactant homeostasis	20	-0.772512	-1.74143	0.00309101	0.00309101	0.0238839	1145	tags=45%, list=6%, signal=42%	Abca3/Oas1a/Pthlh/Oas1g/Epas1/Oas1c/Napsa/Adgrf5/Kdr
GO:0071542	dopaminergic neuron differentiation	30	0.615705	1.78773	0.00309114	0.00309114	0.0238839	1680	tags=37%, list=9%, signal=33%	Wnt2/Dmrta2/Manf/Vegfd/Vegfa/Sfrp1/Tiam1/Hif1a/Ryk/Sfrp2/Rspo2
GO:0051168	nuclear export	159	0.378212	1.43257	0.00312463	0.00312463	0.0241042	3906	tags=39%, list=22%, signal=31%	Camk4/Ran/Eif6/Hspa9/Rangap1/Nsun2/Prkd1/Calr/Anp32b/Thoc6/Park7/Mdn1/Srsf3/Alyref/Nol6/Desi1/Pabpn1/Xpot/Abce1/Magoh/Eif4a3/Ncbp1/Npm1/Rae1/Ifi27/Magohb/Ptpn11/Tpr/Cdkn2a/Eif4e/Bag3/Thoc3/Eny2/Ube2i/Nup153/Emd/Nup107/Fyttd1/Sdad1/Smurf1/Nup62/Nmd3/Xpo5/Hnrnpa2b1/Ssb/Ncbp2/Gas6/Ywhae/Rbm8a/Rita1/Peg12/Supt6/Lsg1/Chtop/Nup93/Atxn1/Sarnp/Pcid2/Txn1/Ddx39b/Rbm10/Nup85
GO:0045954	positive regulation of natural killer cell mediated cytotoxicity	31	-0.694367	-1.70083	0.00313088	0.00313088	0.024114	2542	tags=45%, list=14%, signal=39%	Vav1/Stat5b/H2-Q7/Rasgrp1/H2-D1/Lag3/Klrk1/Stat5a/H2-Q6/H2-T23/H2-Q4/Cadm1/Klrd1/Gimap5
GO:0019674	NAD metabolic process	50	0.553903	1.77627	0.00315396	0.00315396	0.0242531	1079	tags=28%, list=6%, signal=26%	Eno1/Pgk1/Eno1b/Pfkl/Tpi1/Ldha/Pkm/Gapdh/Aldoa/Gpi1/Pcx/Me1/Mdh2/Pfkp
GO:0042558	pteridine-containing compound metabolic process	28	0.636052	1.80961	0.00316145	0.00316145	0.0242721	1485	tags=43%, list=8%, signal=39%	Mthfd1l/Mthfd2/Aldh1l2/Shmt2/Mthfd1/Sardh/Gart/Dhfr/Spr/Tyms/Aasdhppt/Atic
GO:0009168	purine ribonucleoside monophosphate biosynthetic process	20	0.690027	1.83636	0.00329991	0.00329991	0.025295	2243	tags=55%, list=13%, signal=48%	Ampd1/Ada/Gart/Gmpr2/Atic/Impdh1/Nudt2/Adsl/Gmps/Impdh2/Aprt
GO:0051604	protein maturation	448	0.295367	1.23612	0.00331825	0.00331825	0.0253954	2866	tags=32%, list=16%, signal=27%	Eno1/Dhcr24/Pgk1/Eno1b/Thbs1/Serpine1/Pcsk5/Pcsk9/Cryab/Sdf2l1/Hspa5/Bag2/Hspb1/Fkbp11/Hsp90b1/Myh9/Hspd1/Comp/Nol3/Cisd1/Dnajc25/Gcsh/Hsp90aa1/Bace2/Pdia5/Cct3/Hspa9/Pdia4/Grpel1/Ppil1/Pdia3/Serpinh1/Bag1/Timm17a/Tbcb/Dnajb11/Tmem208/Spcs2/Calr/Cct7/Glrx5/Dnajc3/Sec11c/Nudcd2/Tysnd1/Pcsk6/Bola3/P3h1/P4hb/Spon1/Hspa4/Tfr2/Pdrg1/Timm23/Fkbp10/Fkbp4/Flna/Ndufab1/H13/Ppia/Nfu1/Ppib/Prdx4/Fkbp2/Cct6a…
GO:0090330	regulation of platelet aggregation	25	-0.720005	-1.69971	0.00333481	0.00333481	0.0254817	2506	tags=44%, list=14%, signal=38%	Prkcq/C1qtnf1/Lyn/Ubash3b/Emilin2/Alox12/Sh2b3/Syk/Cd9/F11r/Ceacam1
GO:0000479	endonucleolytic cleavage of tricistronic rRNA transcript (SSU-rRNA, 5.8S rRNA, LSU-rRNA)	16	0.735085	1.84214	0.00334354	0.00334354	0.0255082	3460	tags=69%, list=19%, signal=55%	Bop1/Rcl1/Tsr1/Rrs1/Tbl3/Npm1/Sde2/Nol9/Rpp40/Fcf1/Abt1
GO:0043372	positive regulation of CD4-positive, alpha-beta T cell differentiation	32	-0.703108	-1.73689	0.00335465	0.00335465	0.0255526	1408	tags=38%, list=8%, signal=35%	Irf1/Hlx/Nlrp3/Socs1/Il23a/Nckap1l/Il2rg/Nfkbid/Ccr2/Sash3/Cd83/Gimap5
GO:0010935	regulation of macrophage cytokine production	41	-0.658517	-1.69062	0.00336451	0.00336451	0.025579	2038	tags=39%, list=11%, signal=35%	Axl/Tlr2/Acp5/Plcg2/Gprc5b/Tlr4/Wnt5a/Casp4/Tlr3/P2rx7/Laptm5/Cd74/Nod2/Tlr7/Spon2/Cd36
GO:0017157	regulation of exocytosis	178	-0.483876	-1.48987	0.00336869	0.00336869	0.025579	1934	tags=16%, list=11%, signal=15%	Adora2b/Lyn/Stx1b/Notch1/Fbxl20/Sv2c/Ppfia2/Gab2/P2rx7/Rapgef4/Syk/Stxbp2/Kcnb1/Fcer1g/Spi1/Itgb2/Npy1r/Cacna1h/Nckap1l/Rac2/Nppc/Cd84/Ccr2/Prkcb/Ptafr/Cd300a/Gata2/P2ry1/Syt13
GO:0072001	renal system development	302	-0.447693	-1.4249	0.00338972	0.00338972	0.0256984	2026	tags=24%, list=11%, signal=22%	Aldh1a2/Zbtb14/Tmem67/Npr2/Osr2/Notch1/Tbc1d32/Bmp4/Psap/Itga3/Smad3/Foxc1/Lgr4/Agtr1a/Foxd1/Lrp4/Wnk4/Tns2/Col4a1/Gli2/Dll1/Cys1/Flcn/Tshz3/Notch2/Nid1/Gpc3/C3ar1/Col4a4/Wnt5a/Tek/Traf3ip2/Ptch1/Mtss1/Rdh10/Robo2/Plxnd1/Rarb/Spry1/Bcl2l11/Hoxb7/Nfia/Ednra/Enpep/Ctns/Notch3/Klhl3/Dchs2/Pdgfra/Ahr/Acvr2b/Ptpro/Cd24a/Prdm1/Wnt6/Cfh/Fgf10/Angpt2/Mmp9/Ace/Cxcr4/Klf15/Fgf1/Cdkn1c/Gpr4/Ednrb/Bmp7/Aqp1/…
GO:0043101	purine-containing compound salvage	19	0.696218	1.79987	0.00348117	0.00348117	0.0263269	2365	tags=58%, list=13%, signal=50%	Ampd1/Ada/Mtap/Gmpr2/Impdh1/Pgm2/Adsl/Gmps/Impdh2/Aprt/Pnp2
GO:0046427	positive regulation of receptor signaling pathway via JAK-STAT	36	-0.678191	-1.71836	0.00348352	0.00348352	0.0263269	2207	tags=39%, list=12%, signal=34%	Agap2/Tyk2/Prlr/Il7r/Notch1/Ghr/Il10rb/Socs1/Il10/Il23a/Il10ra/Cd300a/Kit/Stra6
GO:0016125	sterol metabolic process	120	0.405859	1.49541	0.00352379	0.00352379	0.0265897	1691	tags=24%, list=9%, signal=22%	Fdps/Sqle/Dhcr24/Idi1/Cyp51/Msmo1/Hmgcs1/Pcsk9/Mvd/Dgat2/Fdft1/Insig1/Mvk/Ldlr/Hmgcr/Hsd17b7/Stard4/Ebp/Apoa1/Lss/Hdlbp/Pmvk/Srebf2/Cyp26b1/Dhcr7/Serpina12/Erg28/Lmf1/Tm7sf2
GO:0043484	regulation of RNA splicing	169	0.383429	1.48618	0.00355044	0.00355044	0.0267491	3671	tags=37%, list=21%, signal=30%	Rrp1b/Zpr1/Jmjd6/Taf10/Prdx6/Sf3b5/C1qbp/Wdr77/Srsf3/Ncl/Srsf2/Srsf7/Supt20/Cdk12/Ptbp1/Magoh/Taf12/Eif4a3/Ncbp1/Srsf10/Aff2/Eif1/Prmt5/Fastk/Npm1/Sap18b/Rbm3/Zfp326/Supt3/Hnrnpu/Smn1/Clk3/Eny2/Pcbp4/Rbmx/Prpf19/Hspa8/Srsf9/Upf3a/Dazap1/Puf60/Ccnl1/Clns1a/Rest/Sgf29/Rbm42/Srsf1/Fam50a/Sap18/Sf1/Hnrnpf/Srrm1/Hnrnpa2b1/Habp4/Rbm8a/Kat2a/Sf3b4/Rps13/Upf1/Tada2b/Srrm4/Rnps1/Mbnl3
GO:0051100	negative regulation of binding	138	-0.513081	-1.54874	0.00356838	0.00356838	0.0268425	1148	tags=20%, list=6%, signal=19%	Hfe/Arrb2/B2m/Ifi204/Dab2/Myod1/Tfap4/Nfib/Mndal/Ifit2/Rgma/Mrln/Sp100/Hmga2/Il10/Ifi203/Tmc8/Ifi207/Itga4/Ifi208/Atp2a3/Ifi206/Lef1/Ifi213/Pln/Ifi209/Pdgfb/Gzma
GO:0043304	regulation of mast cell degranulation	28	-0.703772	-1.70305	0.00359178	0.00359178	0.0269765	1934	tags=43%, list=11%, signal=38%	Fgr/Adora2b/Lyn/Gab2/Syk/Stxbp2/Fcer1g/Rac2/Nppc/Cd84/Cd300a/Gata2
GO:0071404	cellular response to low-density lipoprotein particle stimulus	28	-0.703175	-1.7016	0.00364499	0.00364499	0.0273337	1347	tags=39%, list=8%, signal=36%	Mylip/Tlr4/Trem2/Syk/Cd68/Cd9/Fcer1g/Itgb2/Lpl/Cd36/Cdh13
GO:0098543	detection of other organism	20	-0.77027	-1.73638	0.00365816	0.00365816	0.02739	2396	tags=50%, list=13%, signal=43%	H2-Q7/H2-D1/Tlr2/H2-Q6/Clec4n/H2-Q4/Tlr1/Pglyrp1/Naip2/Nod2
GO:0001796	regulation of type IIa hypersensitivity	15	-0.805842	-1.7158	0.00371542	0.00371542	0.0276476	2396	tags=53%, list=13%, signal=46%	H2-Q7/H2-D1/Fcgr3/H2-Q6/Fcer1g/H2-T23/H2-Q4/Fcgr1
GO:0001798	positive regulation of type IIa hypersensitivity	15	-0.805842	-1.7158	0.00371542	0.00371542	0.0276476	2396	tags=53%, list=13%, signal=46%	H2-Q7/H2-D1/Fcgr3/H2-Q6/Fcer1g/H2-T23/H2-Q4/Fcgr1
GO:0002892	regulation of type II hypersensitivity	15	-0.805842	-1.7158	0.00371542	0.00371542	0.0276476	2396	tags=53%, list=13%, signal=46%	H2-Q7/H2-D1/Fcgr3/H2-Q6/Fcer1g/H2-T23/H2-Q4/Fcgr1
GO:0002894	positive regulation of type II hypersensitivity	15	-0.805842	-1.7158	0.00371542	0.00371542	0.0276476	2396	tags=53%, list=13%, signal=46%	H2-Q7/H2-D1/Fcgr3/H2-Q6/Fcer1g/H2-T23/H2-Q4/Fcgr1
GO:0002861	regulation of inflammatory response to antigenic stimulus	39	-0.668975	-1.71481	0.00373963	0.00373963	0.0277849	2486	tags=41%, list=14%, signal=35%	Ccr7/Pla2g2d/H2-Q7/H2-D1/Fcgr3/Trem2/H2-Q6/Fcer1g/H2-T23/Il10/Cd24a/H2-Q4/Fcgr2b/Nod2/Fcgr1/Cd28
GO:0060039	pericardium development	24	-0.730134	-1.71271	0.0037686	0.0037686	0.0279572	1845	tags=33%, list=10%, signal=30%	Notch1/Smad3/Tgfbr3/Bmp5/Wnt5a/Itga4/Bmp7/Dll4
GO:0009126	purine nucleoside monophosphate metabolic process	34	0.59878	1.81085	0.00377596	0.00377596	0.0279689	2468	tags=50%, list=14%, signal=43%	Ak4/Guk1/Nt5c/Ampd1/Ak1/Ada/Ak2/Gart/Gmpr2/Atic/Impdh1/Nudt2/Adsl/Gmps/Impdh2/Aprt/Dnph1
GO:0010324	membrane invagination	67	-0.594893	-1.66124	0.00378822	0.00378822	0.0280169	2480	tags=34%, list=14%, signal=30%	Aif1/Fcho2/Snx33/Stap1/Gulp1/Gsn/Plcg2/Fcgr3/Elmo1/Bin2/Trem2/Msr1/Appl2/Fcer1g/Itgb2/Nckap1l/Fcgr2b/Abca1/Arhgap25/Fcgr1/Cd300a/Gata2/Cd36
GO:0072329	monocarboxylic acid catabolic process	117	0.40778	1.51111	0.0038151	0.0038151	0.028171	2426	tags=20%, list=14%, signal=17%	Adipoq/Slc16a3/Mfsd2a/Ldha/Aldh1l2/Sesn2/Acot7/Nudt19/Dbi/Tysnd1/Twist1/Cnr1/Cyp26b1/Pgd/Acat2/Lpin2/Etfb/Scp2/Fah/Hao1/Eci1/Acadvl/Akr1a1
GO:0046425	regulation of receptor signaling pathway via JAK-STAT	75	-0.581308	-1.63165	0.00382072	0.00382072	0.028171	2207	tags=32%, list=12%, signal=28%	Agap2/Tyk2/Bcl3/Egf/Prlr/Il7r/Notch1/Ghr/Irf1/Sh2b3/Il10rb/Cav1/Gadd45a/Socs1/Socs3/Hmga2/Parp14/Il10/Il23a/Ptprc/Il10ra/Cd300a/Kit/Stra6
GO:0086003	cardiac muscle cell contraction	60	-0.605942	-1.65704	0.00382874	0.00382874	0.0281872	1981	tags=27%, list=11%, signal=24%	Stc1/Gsn/Uty/Scn2b/Ank2/Kcnj2/Jup/Cav1/Kcnh2/Cacna1h/Abcc9/Casq2/Atp1a2/Kcnj8/Pln/Kcna5
GO:0007189	adenylate cyclase-activating G protein-coupled receptor signaling pathway	113	-0.526041	-1.55128	0.00387883	0.00387883	0.028502	2475	tags=27%, list=14%, signal=23%	Pde4b/Gpr161/Chga/Adgrl4/Ramp1/Gnas/Adora2b/Adra1a/Atp2b4/Adcy4/Gpr157/Arrdc3/Rapgef4/Cxcl9/Ramp2/Cxcl10/Pthlh/Calcrl/Ptgir/Adgre1/Gpr65/Abca1/Gpr4/S1pr1/Adgre4/Adgrg1/Ramp3/Adgrf5/Pln/S1pr4
GO:0008203	cholesterol metabolic process	114	0.412669	1.51269	0.00388328	0.00388328	0.028502	824	tags=19%, list=5%, signal=19%	Fdps/Sqle/Dhcr24/Idi1/Cyp51/Msmo1/Hmgcs1/Pcsk9/Mvd/Dgat2/Fdft1/Insig1/Mvk/Ldlr/Hmgcr/Hsd17b7/Stard4/Ebp/Apoa1/Lss/Hdlbp/Pmvk
GO:0071674	mononuclear cell migration	169	-0.496426	-1.52541	0.00394905	0.00394905	0.0289252	1479	tags=28%, list=8%, signal=26%	Eps8/Lyn/Cxcl14/Cxcl12/Padi2/Xcl1/Il34/Plcb1/Lrch1/Nbl1/Cd200/C3ar1/Wnt5a/Slamf9/Ccl4/Ccl3/Csf1r/Cxcl10/Gpr183/Defb25/Itgb7/Ccl8/Slc8b1/Spi1/Dock8/Cx3cr1/Coro1a/Spns2/Ptpro/Jam2/C5ar1/Ch25h/Apod/S1pr1/Ccl6/Itga4/Itgal/Pla2g7/Ccr2/Ccl11/Cadm1/Ccl12/Flt1/Ripor2/Pecam1/F11r/Pdgfb
GO:0170033	L-amino acid metabolic process	125	0.402138	1.4959	0.0039529	0.0039529	0.0289252	2391	tags=34%, list=13%, signal=30%	Egln3/Ddah1/P4ha2/Ass1/Egln1/Asns/P4ha1/Plod2/Gcat/Phgdh/Gcsh/Shmt2/Mthfd1/Pemt/Psph/Plod3/Mtap/Txnrd1/P4hb/Psat1/Mri1/Park7/P4ha3/Cad/Gart/Oat/Prdx4/Dhfr/Aldh18a1/Pycr2/Gfpt2/Spr/Got1/Aasdhppt/Atf4/Pycr1/Pcmt1/Gmps/Fah/Asrgl1/Slc7a11/Gamt/Got2
GO:0090114	COPII-coated vesicle budding	35	0.592319	1.79588	0.00397498	0.00397498	0.0290428	5177	tags=63%, list=29%, signal=45%	Insig1/Trappc6a/Trappc5/Sar1a/Vapa/Trappc4/Sec13/Preb/Trappc3/Sar1b/Sec23a/Sec23b/Trappc1/Mia3/Sec16a/Sec24d/Rab1a/Sec31a/Vapb/Pdcd6/Pef1/Trappc2l
GO:0035455	response to interferon-alpha	25	-0.713998	-1.68553	0.00403971	0.00403971	0.0294273	2341	tags=48%, list=13%, signal=42%	Ro60/Axl/Ifi204/Ifitm6/Pde12/Oas1a/Ifit2/Oas1g/Oas1c/Ifitm1/Ifit1/Tgtp1
GO:0002220	innate immune response activating cell surface receptor signaling pathway	76	-0.573626	-1.61079	0.00403977	0.00403977	0.0294273	2095	tags=32%, list=12%, signal=28%	Rab11fip2/Ticam2/Tlr2/Lyn/Klrk1/Nmi/Plcg2/Tlr4/Tril/Trem2/Syk/Oas1a/Ly96/Appl2/Oas1g/Tyrobp/Oas1c/Clec4n/Pik3ap1/Tlr1/Cd14/Nod2/Tnip3/Klrd1
GO:0051347	positive regulation of transferase activity	379	-0.428895	-1.38081	0.00408029	0.00408029	0.0296778	2080	tags=21%, list=12%, signal=19%	Insr/Ephb4/Map2k6/Axl/Arrb2/Pxn/Egf/Prlr/Efna1/Met/Pot1a/Vegfc/Cd86/Trib2/Adra1a/Mmd/Agtr1a/Atp2b4/Sash1/Map3k5/Wnk4/Il34/Gprc5b/Epha2/Cd200/Pot1b/Tlr4/Igtp/Map3k1/Notch2/Wnt5a/Tek/Arrdc3/Map3k11/P2rx7/Ror1/Trem2/Socs1/Syk/Csf1r/Irgm2/Agrn/Irgm1/Hmga2/Ntrk2/Fgfr4/Tnfrsf11a/Pik3r6/Ccnd1/Il23a/Pdgfra/Prox1/Fgd4/Il1b/Cd24a/Tlr1/Cd74/Pkib/Card10/Slc11a1/Ptprc/Fgf1/Ntf3/Fgd2/Rassf2/Kitl/Cd300a/Reln/Er…
GO:0021983	pituitary gland development	22	-0.737837	-1.68624	0.00410572	0.00410572	0.0297824	1772	tags=36%, list=10%, signal=33%	Bmp4/Gli2/Wnt5a/Tcf7l2/Hmga2/Fgf10/Gata2/Gli1
GO:0060337	type I interferon-mediated signaling pathway	56	-0.625397	-1.70107	0.00411769	0.00411769	0.0297824	2166	tags=34%, list=12%, signal=30%	Isg15/Tyk2/Ikbke/Ifitm6/Usp27x/Trim6/Rbm47/Wnt5a/Ifih1/Irf7/Oas1a/Stat2/Oas1g/Oas1c/Nlrc5/Ifitm1/Usp29/Oas2/Oas3
GO:0071357	cellular response to type I interferon	56	-0.625397	-1.70107	0.00411769	0.00411769	0.0297824	2166	tags=34%, list=12%, signal=30%	Isg15/Tyk2/Ikbke/Ifitm6/Usp27x/Trim6/Rbm47/Wnt5a/Ifih1/Irf7/Oas1a/Stat2/Oas1g/Oas1c/Nlrc5/Ifitm1/Usp29/Oas2/Oas3
GO:0009260	ribonucleotide biosynthetic process	166	0.374171	1.45233	0.0041193	0.0041193	0.0297824	3755	tags=45%, list=21%, signal=36%	Eno1/Eno1b/Aldoa/Pdk1/Nme1/Cda/Uck2/Guk1/Nme2/Acot7/Mthfd1/Ampd1/Ak1/Pdk3/Ada/Ak2/Ndufab1/Cad/Gart/Umps/Gmpr2/Atpsckmt/Mpc1/Vdac1/Atic/Adcy2/Impdh1/Nudt2/Acsl4/Vcp/Ndufb8/Ndufa8/Ndufb10/Adsl/Gmps/Ndufb6/Impdh2/Map2k1/Ndufs7/Acly/Sdhb/Aprt/Ndufs3/Ndufs8/Ndufa11/Ndufs5/Ndufs4/Parp1/Nme6/Ndufb9/Ndufb7/Ndufv1/Cmpk1/Mpc2/Sdhd/Ndufb11/Papss1/Dlat/Ndufs6/Ndufb2/Stoml2/Acsl1/Ndufa13/Dnajc30/Dhodh/Dcakd/M…
GO:1902652	secondary alcohol metabolic process	125	0.400683	1.49049	0.0041522	0.0041522	0.0299754	824	tags=18%, list=5%, signal=18%	Fdps/Sqle/Dhcr24/Idi1/Cyp51/Msmo1/Hmgcs1/Pcsk9/Mvd/Dgat2/Fdft1/Insig1/Mvk/Ldlr/Hmgcr/Hsd17b7/Stard4/Ebp/Apoa1/Lss/Enpp1/Hdlbp/Pmvk
GO:0002504	antigen processing and presentation of peptide or polysaccharide antigen via MHC class II	24	-0.727965	-1.70763	0.00420238	0.00420238	0.030238	1975	tags=58%, list=11%, signal=52%	B2m/Unc93b1/H2-DMb1/H2-DMa/Trem2/Ctss/H2-Ab1/Fcer1g/Ifi30/Cd74/H2-Eb1/Fcgr2b/H2-Aa/H2-DMb2
GO:0032616	interleukin-13 production	27	-0.729027	-1.75198	0.00420733	0.00420733	0.030238	3220	tags=52%, list=18%, signal=43%	Irf4/Rara/Il17ra/H2-Q7/H2-D1/Il33/Tlr4/Nlrp3/Tslp/H2-Q6/Tnfrsf21/H2-T23/H2-Q4/Lef1
GO:0032656	regulation of interleukin-13 production	27	-0.729027	-1.75198	0.00420733	0.00420733	0.030238	3220	tags=52%, list=18%, signal=43%	Irf4/Rara/Il17ra/H2-Q7/H2-D1/Il33/Tlr4/Nlrp3/Tslp/H2-Q6/Tnfrsf21/H2-T23/H2-Q4/Lef1
GO:0001974	blood vessel remodeling	56	-0.624799	-1.69945	0.00421401	0.00421401	0.0302411	2038	tags=39%, list=11%, signal=35%	Axl/Npr2/Tgm2/Gja1/Foxc1/Tgfbr3/Hoxa3/Ednra/Epas1/Ahr/Acvr2b/Fgf10/Nos2/Angpt2/Nppc/Itga4/Nos3/Ccr2/Chd7/Flt4/Ceacam1/Dll4
GO:1901659	glycosyl compound biosynthetic process	18	0.707293	1.81146	0.00427021	0.00427021	0.030599	2468	tags=44%, list=14%, signal=38%	Dctd/Ak1/Ada/Mtap/Dtymk/Pgm2/Aprt/Dnph1
GO:0007043	cell-cell junction assembly	121	-0.520387	-1.54692	0.00428487	0.00428487	0.0306587	1378	tags=18%, list=8%, signal=17%	Epha2/Snai2/Jup/Flcn/Cav1/Ramp2/Prkch/Cd9/Il1b/Ptpro/Ace/Hopx/Cdh19/Cldn1/Cldn2/Cdh13/Pecam1/F11r/Aplnr/Cdh5/Cldn5/Esam
GO:0021515	cell differentiation in spinal cord	31	-0.686902	-1.68255	0.0043618	0.0043618	0.031163	2674	tags=35%, list=15%, signal=30%	Dync2h1/Scyl3/Gli3/Gdpd5/Tctn1/Gli2/Ptch1/Sox13/Pax7/Gata2/Dll4
GO:0007266	Rho protein signal transduction	135	-0.504659	-1.52085	0.00438114	0.00438114	0.031255	2490	tags=29%, list=14%, signal=25%	Nrp1/Lpar6/Stard13/Vangl2/Ophn1/Plxnb1/Stard8/Eps8/Arhgdib/Met/Adra1a/Itga3/Agtr1a/Myoc/Rhobtb1/Flcn/Tek/Mcf2l/Ntn1/Shtn1/Arrb1/Scai/Tagap/Ednra/Arhgap20/Sema4d/Lpar4/Gpr65/Arhgef3/P2ry10/Abca1/Gpr4/Ripor2/Ngfr/Adgrg1/Cdh13/Pecam1/Rasip1/F11r
GO:1904018	positive regulation of vasculature development	164	-0.499853	-1.53417	0.00440527	0.00440527	0.0313347	1859	tags=26%, list=10%, signal=23%	Vegfc/Cxcl12/Grn/Agtr1a/Sash1/Emilin2/Cysltr1/Smoc2/Jup/Dll1/C3ar1/Wnt5a/Tek/Tlr3/Sema5a/Cd34/Ramp2/Hmga2/Pik3r6/Itgb2/Il10/Cx3cr1/Il1b/Rapgef3/C5ar1/Angpt2/Itgax/Mmp9/Cxcr4/Fgf1/Nos3/Prkcb/Cybb/Ccl11/Gata2/Flt1/Aqp1/Igf2/Kdr/Aplnr/Cdh5/Tie1
GO:0045807	positive regulation of endocytosis	170	-0.481481	-1.47989	0.00440527	0.00440527	0.0313347	2505	tags=32%, list=14%, signal=28%	Cfp/Alms1/Ccr7/Rab27a/Rap1gap/Mertk/Dgkd/Stap1/Insr/Hfe/Axl/Arrb2/Synj1/Egf/B2m/Dab2/Clip3/Ppt1/Plcg2/Fcgr3/Cln3/Dll1/Cd151/Gpc3/Wnt5a/Vtn/Cav1/Dcx/Trem2/C2/Arrb1/Syk/Appl2/Colec11/Camk1d/Clu/Fcer1g/Sfrp4/Sele/Il15/Nckap1l/Il2rg/Cd14/Il2rb/Slc11a1/Dock2/Ptprc/Fcgr2b/Nod2/Ntf3/Fcgr1/Ighm/Gata2/Cd36
GO:0032069	regulation of nuclease activity	23	-0.716666	-1.66875	0.00444531	0.00444531	0.0315731	956	tags=39%, list=5%, signal=37%	Oasl1/Pde3a/Oas1a/Oas1g/Oas1c/Oasl2/Oas2/Oas3/Gzma
GO:0009187	cyclic nucleotide metabolic process	26	-0.702956	-1.67172	0.00450136	0.00450136	0.0319243	1943	tags=35%, list=11%, signal=31%	Npr2/Cnp/Adcy4/Epha2/Npr1/Pde2a/Gucy1b1/Gucy1a1/Nppc
GO:0050852	T cell receptor signaling pathway	117	-0.525577	-1.55382	0.00452597	0.00452597	0.032046	2826	tags=31%, list=16%, signal=26%	Fosl2/Sppl3/Phpt1/Wnk1/Kcnn4/Zc3h12a/Txk/Rnf31/Malt1/Ccr7/Pde4b/H2-Q7/Lipa/H2-D1/Fyn/Cd247/Dennd1b/Plcg2/Ptpn6/Ubash3a/Icosl/H2-Q6/Tnfrsf21/Laptm5/Tec/H2-Q4/Card11/Nfkbid/Lilrb4a/Bcl2a1d/Ptprc/Themis2/Lcp2/Cd300a/Cd28/Btnl9
GO:0033120	positive regulation of RNA splicing	47	0.542702	1.72536	0.00453177	0.00453177	0.032046	3547	tags=43%, list=20%, signal=34%	Zpr1/Prdx6/Wdr77/Ncl/Eif4a3/Ncbp1/Eif1/Prmt5/Rbm3/Smn1/Rbmx/Prpf19/Hspa8/Upf3a/Dazap1/Clns1a/Srsf1/Habp4/Sf3b4/Upf1
GO:2001214	positive regulation of vasculogenesis	11	-0.846268	-1.69862	0.00454551	0.00454551	0.0320962	1864	tags=64%, list=10%, signal=57%	Rin2/Tmem100/Cd34/Ramp2/Asb4/Kdr/Ceacam1
GO:0003094	glomerular filtration	23	-0.715413	-1.66583	0.0045544	0.0045544	0.0321121	839	tags=35%, list=5%, signal=33%	Gja5/Xpnpep3/Gja1/Ednra/Ptpro/Aqp1/Adgrf5/Pdgfb
GO:0061081	positive regulation of myeloid leukocyte cytokine production involved in immune response	38	-0.652116	-1.66521	0.00457128	0.00457128	0.0321842	2093	tags=47%, list=12%, signal=42%	Ticam2/Tlr2/Plcg2/Gprc5b/Tlr4/Wnt5a/Casp4/Tlr3/P2rx7/Syk/Fcer1g/Laptm5/Cd74/Nod2/Tlr7/Spon2/Kit/Cd36
GO:0050817	coagulation	147	-0.503073	-1.52176	0.00459955	0.00459955	0.0323362	2561	tags=29%, list=14%, signal=25%	Pip5k1c/Prkcq/Rab27a/Mertk/Tspan8/C1qtnf1/Gnas/Enpp4/Axl/Tspan9/Serping1/Fbln1/Lyn/Ubash3b/P2ry12/Pear1/Emilin2/Alox12/Sh2b3/Tlr4/Vtn/Cav1/Ptpn6/Fermt3/Syk/Entpd2/Thbd/Cd9/Fcer1g/Tec/Pdgfra/Plek/Selp/Cfh/Lilrb4a/Entpd1/Cd36/P2ry1/F11r/Pdgfb/Ceacam1/Vwf
GO:0031016	pancreas development	57	-0.604978	-1.6474	0.00462939	0.00462939	0.0324987	2080	tags=28%, list=12%, signal=25%	Insr/Aldh1a2/Met/Bmp4/Ccdc40/Dll1/Bmp5/Wnt5a/Ccdc39/Clu/Prox1/Acvr2b/Fgf10/Hhex/Igf2/Nr5a2
GO:0007051	spindle organization	184	0.344343	1.34397	0.00463751	0.00463751	0.0325085	5041	tags=45%, list=28%, signal=33%	Plk3/Haus7/Myh9/Plk2/Ntmt1/Ranbp1/Sac3d1/Stil/Haus8/Flna/Pde4dip/Rangrf/Rcc1/Chek2/Tubg1/Kpnb1/Cenph/Ddb1/Spag5/Rae1/Poldip2/Vcp/Birc5/Mybl2/Tubb5/Hnrnpu/Rps3/Tpr/Senp6/Tpx2/Nudc/Dlgap5/Bora/Mapre1/Haus6/Bccip/Kif4/Chmp6/Ino80/Spc25/Smc3/Nup62/Fsd1/Rab11a/Snhg15/Dcaf13/Gtf2b/Kif2a/Plk1/Incenp/Chmp2a/Haus1/Aurkb/Uhrf1/Gnai1/Cdca8/Kif23/Haus2/Limk2/Tacc3/Uvrag/Aaas/Rhoa/Mlh1/Rnf4/Chmp1a/Tacc1/Dctn2…
GO:0019682	glyceraldehyde-3-phosphate metabolic process	18	0.704375	1.80398	0.00468428	0.00468428	0.0327889	1122	tags=44%, list=6%, signal=42%	Eno1/Pgk1/Tpi1/Pgam1/Gapdh/Pcx/Mdh2/Tkt
GO:0062208	positive regulation of pattern recognition receptor signaling pathway	61	-0.605945	-1.65949	0.00469561	0.00469561	0.0328207	2531	tags=33%, list=14%, signal=28%	Peli3/Slc46a2/Nr1h3/Ticam2/Oasl1/Plcg2/Dhx58/Zc3hav1/Slc15a3/Tlr4/Casp4/Cav1/Pik3ap1/Gbp2/Tlr1/Cd14/Ddx60/Rsad2/Gbp5/Cd36
GO:0035904	aorta development	66	-0.582641	-1.6255	0.00471143	0.00471143	0.0328422	1047	tags=20%, list=6%, signal=19%	Robo2/Plxnd1/Tbx2/Ednra/Pde2a/Prox1/Prdm1/Cxcr4/Chd7/Ngfr/Eya1/Dll4/Aplnr
GO:0050766	positive regulation of phagocytosis	71	-0.584735	-1.63159	0.00471227	0.00471227	0.0328422	986	tags=37%, list=6%, signal=35%	Cfp/Ccr7/Rab27a/Rap1gap/Mertk/Stap1/Plcg2/Fcgr3/Trem2/C2/Appl2/Colec11/Camk1d/Fcer1g/Il15/Nckap1l/Il2rg/Il2rb/Slc11a1/Dock2/Ptprc/Fcgr2b/Nod2/Fcgr1/Gata2/Cd36
GO:0031401	positive regulation of protein modification process	753	-0.386721	-1.25797	0.00474094	0.00474094	0.0329945	2048	tags=18%, list=11%, signal=16%	Map2k6/Dgkq/Arrb2/Tspan9/Pxn/Card14/Egf/Prlr/Pink1/Parp9/Atg14/Lyn/Efna1/Met/Vegfc/Dab2/Cd86/Clip3/Trib2/Itga1/Adra1a/Bmp4/Mmd/Mtcp1/Atp2b4/Sash1/Nmi/Limch1/Plcg2/Trim6/Map3k5/Birc3/Lrp4/Ghr/Wnk4/Il34/Pml/Gprc5b/Gfra1/Gpnmb/Cln3/Tlr4/Flcn/Igtp/Rspo1/Map3k1/Notch2/Wnt5a/Tek/Vtn/Cav1/Arrdc3/Map3k11/P2rx7/Flt3l/Wdfy2/Trem2/Socs1/Arrb1/Syk/Spry2/Csf1r/Irgm2/Rgma/Agrn/Irgm1/Tslp/Ednra/Cspg4/Peli2/Hmga…
GO:0002183	cytoplasmic translational initiation	33	0.596663	1.78899	0.00475819	0.00475819	0.0330669	4799	tags=67%, list=27%, signal=49%	Eif4ebp1/Dhx29/Eif4a1/Eif2b3/Eif2b1/Eif2b5/Ncbp1/Eif3i/Eif3d/Eif2b2/Eif5/Denr/Eif2s2/Ncbp2/Eif3a/Mcts2/Ythdf2/Mif4gd/Eif2ak4/Eif2b4/Rpl13a/Mcts1
GO:0060099	regulation of phagocytosis, engulfment	19	-0.77352	-1.74117	0.00481457	0.00481457	0.0334108	1580	tags=47%, list=9%, signal=43%	Stap1/Plcg2/Trem2/Appl2/Nckap1l/Fcgr1/Cd300a/Gata2/Cd36
GO:0045588	positive regulation of gamma-delta T cell differentiation	10	-0.863625	-1.69534	0.00483203	0.00483203	0.033421	1534	tags=70%, list=9%, signal=64%	Stat5a/Sox13/Syk/Nckap1l/Ptprc/Lef1/Gimap5
GO:0046645	positive regulation of gamma-delta T cell activation	10	-0.863625	-1.69534	0.00483203	0.00483203	0.033421	1534	tags=70%, list=9%, signal=64%	Stat5a/Sox13/Syk/Nckap1l/Ptprc/Lef1/Gimap5
GO:0009167	purine ribonucleoside monophosphate metabolic process	31	0.622308	1.82227	0.00484441	0.00484441	0.033421	2243	tags=52%, list=13%, signal=45%	Ak4/Guk1/Nt5c/Ampd1/Ak1/Ada/Ak2/Gart/Gmpr2/Atic/Impdh1/Nudt2/Adsl/Gmps/Impdh2/Aprt
GO:1905153	regulation of membrane invagination	20	-0.761952	-1.71763	0.00484917	0.00484917	0.033421	1580	tags=45%, list=9%, signal=41%	Stap1/Plcg2/Trem2/Appl2/Nckap1l/Fcgr1/Cd300a/Gata2/Cd36
GO:0043297	apical junction assembly	66	-0.581586	-1.62256	0.00485253	0.00485253	0.033421	1378	tags=18%, list=8%, signal=17%	Cldn34c1/Epha2/Snai2/Ramp2/Prkch/Cldn1/Cldn2/Pecam1/F11r/Cdh5/Cldn5/Esam
GO:0002717	positive regulation of natural killer cell mediated immunity	32	-0.690343	-1.70535	0.00485751	0.00485751	0.033421	2542	tags=44%, list=14%, signal=38%	Vav1/Stat5b/H2-Q7/Rasgrp1/H2-D1/Lag3/Klrk1/Stat5a/H2-Q6/H2-T23/H2-Q4/Cadm1/Klrd1/Gimap5
GO:1904892	regulation of receptor signaling pathway via STAT	81	-0.572525	-1.63044	0.00487882	0.00487882	0.03352	2207	tags=31%, list=12%, signal=27%	Agap2/Tyk2/Bcl3/Egf/Prlr/Il7r/Notch1/Ghr/Irf1/Sh2b3/Il10rb/Cav1/Gadd45a/Socs1/Tslp/Socs3/Hmga2/Parp14/Il10/Il23a/Ptprc/Il10ra/Cd300a/Kit/Stra6
GO:0009152	purine ribonucleotide biosynthetic process	155	0.377193	1.43697	0.0049524	0.0049524	0.0339772	3755	tags=44%, list=21%, signal=35%	Eno1/Eno1b/Aldoa/Pdk1/Nme1/Guk1/Nme2/Acot7/Mthfd1/Ampd1/Ak1/Pdk3/Ada/Ak2/Ndufab1/Gart/Gmpr2/Atpsckmt/Mpc1/Vdac1/Atic/Adcy2/Impdh1/Nudt2/Acsl4/Vcp/Ndufb8/Ndufa8/Ndufb10/Adsl/Gmps/Ndufb6/Impdh2/Map2k1/Ndufs7/Acly/Sdhb/Aprt/Ndufs3/Ndufs8/Ndufa11/Ndufs5/Ndufs4/Parp1/Nme6/Ndufb9/Ndufb7/Ndufv1/Mpc2/Sdhd/Ndufb11/Papss1/Dlat/Ndufs6/Ndufb2/Stoml2/Acsl1/Ndufa13/Dnajc30/Dcakd/Myc/Ndufa9/Slc25a16/Ndufv3/Gcdh…
GO:0050732	negative regulation of peptidyl-tyrosine phosphorylation	51	-0.63761	-1.70993	0.00499153	0.00499153	0.0341972	1408	tags=25%, list=8%, signal=24%	Irf1/Cav1/Ptpn6/Socs1/Socs3/Parp14/Sema4d/Samsn1/Lilrb4a/Ptprc/Ntf3/Cd300a/Pecam1
GO:0010755	regulation of plasminogen activation	15	0.719297	1.7676	0.00503253	0.00503253	0.0344175	101	tags=27%, list=1%, signal=27%	Eno1/Eno1b/Thbs1/Serpine1
GO:0006839	mitochondrial transport	167	0.366883	1.43412	0.00503791	0.00503791	0.0344175	3618	tags=38%, list=20%, signal=30%	Bnip3/Slc1a3/Tomm40/Ier3/Hspd1/Nol3/Hsp90aa1/Timm10/Grpel1/Timm17a/Slc25a5/Hif1a/Bok/Hspa4/Slc25a4/Timm13/Timm23/Dnajc15/Slc25a38/Timm50/Timm9/Fxn/Tmem14c/Dnlz/Mrpl18/Mcub/Siva1/Mpc1/Timm17b/Vdac1/Samm50/Timm22/Bax/Pdcd5/Tomm20/Tomm70a/Eya2/Smdt1/Aifm1/Kif5b/Slc25a33/Nptx1/Vdac2/Bak1/Mtch1/Slc25a32/Slc25a1/Mpc2/Naif1/Sfxn1/Mtch2/Slc25a3/Tomm22/Bloc1s2/Ndufa13/Trp53/Pam16/Timm29/Slc25a16/Bad/Ccdc5…
GO:0009142	nucleoside triphosphate biosynthetic process	92	0.444638	1.57235	0.00505554	0.00505554	0.0344892	3755	tags=50%, list=21%, signal=40%	Eno1/Eno1b/Ak4/Aldoa/Nme1/Uck2/Nme2/Ak1/Ndufab1/Cad/Dtymk/Atpsckmt/Impdh1/Nudt2/Vcp/Ndufb8/Ndufa8/Ndufb10/Ndufb6/Impdh2/Map2k1/Ndufs7/Sdhb/Ndufs3/Ndufs8/Ndufa11/Ndufs5/Ndufs4/Parp1/Nme6/Ndufb9/Ndufb7/Ndufv1/Sdhd/Ndufb11/Ndufs6/Ndufb2/Stoml2/Ndufa13/Dnajc30/Myc/Ndufa9/Ndufv3/Ndufv2/Ndufs2/Ndufa12
GO:0015980	energy derivation by oxidation of organic compounds	283	0.310517	1.28253	0.00506404	0.00506404	0.0344985	3531	tags=39%, list=20%, signal=31%	Bnip3/Ldha/Ak4/Cox7a1/Gck/Gys1/Slc1a3/Pgm1/Stbd1/Cox4i2/Cisd1/Prelid1/Shmt2/Cycs/Nr4a3/Mybbp1a/Enpp1/Hif1a/Gadd45gip1/Comt/Cavin3/Mdh2/Cox5a/Slc25a25/Dnajc15/Ndufab1/Park7/Gbe1/Uqcrq/Fxn/Atpsckmt/Pomc/Arl2/Uqcc2/Nr1d1/Mtfr1/Cox6a1/Suclg1/Sco2/Ugp2/Fh1/Vcp/Ndufb8/Pgm2/Bax/Ndufa8/Ndufb10/Adsl/Etfb/Cyc1/Ndufb6/Ndufs7/Ppp1r3d/Chchd2/Idh2/Acly/Sdhb/Ndufs3/Slc25a33/Ndufs8/Cdk1/Coq9/Ndufa11/Ppp1ca/Ndufs…
GO:0048026	positive regulation of mRNA splicing, via spliceosome	30	0.600971	1.74495	0.00507181	0.00507181	0.0345029	3547	tags=53%, list=20%, signal=43%	Prdx6/Wdr77/Ncl/Eif4a3/Ncbp1/Eif1/Prmt5/Rbm3/Rbmx/Prpf19/Hspa8/Upf3a/Dazap1/Clns1a/Sf3b4/Upf1
GO:0032682	negative regulation of chemokine production	27	-0.723988	-1.73987	0.00517205	0.00517205	0.0351292	1378	tags=37%, list=8%, signal=34%	Ticam2/Epha2/Oas1a/Oas1g/Oas1c/Cd24a/Lilrb4a/Apod/Sigirr/Oas3
GO:0006958	complement activation, classical pathway	25	-0.708466	-1.67247	0.00517841	0.00517841	0.0351292	2202	tags=48%, list=12%, signal=42%	Cr2/Serping1/Cd55/Trem2/C2/C1qa/C1qc/C1qb/C1ra/Cd46/C1s1/Ighm
GO:0046390	ribose phosphate biosynthetic process	172	0.372299	1.44097	0.0052318	0.0052318	0.0354417	3755	tags=44%, list=21%, signal=35%	Eno1/Eno1b/Aldoa/Pdk1/Nme1/Cda/Uck2/Guk1/Nme2/Acot7/Mthfd1/Ampd1/Ak1/Pdk3/Ada/Ak2/Ndufab1/Cad/Gart/Umps/Gmpr2/Atpsckmt/Mpc1/Vdac1/Atic/Adcy2/Impdh1/Nudt2/Acsl4/Vcp/Ndufb8/Ndufa8/Ndufb10/Adsl/Gmps/Ndufb6/Impdh2/Map2k1/Ndufs7/Acly/Sdhb/Aprt/Ndufs3/Ndufs8/Ndufa11/Ndufs5/Ndufs4/Parp1/Nme6/Ndufb9/Ndufb7/Ndufv1/Cmpk1/Mpc2/Sdhd/Ndufb11/Papss1/Dlat/Ndufs6/G6pdx/Ndufb2/Stoml2/Acsl1/Ndufa13/Dnajc30/Dhodh/D…
GO:0070528	protein kinase C signaling	36	-0.666306	-1.68825	0.00526454	0.00526454	0.0356136	2218	tags=33%, list=12%, signal=29%	Dgkd/Dgkq/Adra1a/Wnk4/Akap12/Wnt5a/Prkch/Plek/Sez6l2/Flt4/Adgrg1/Pdgfb
GO:0051983	regulation of chromosome segregation	119	0.40276	1.48736	0.00527764	0.00527764	0.0356524	4932	tags=46%, list=28%, signal=34%	Anapc15/Nek6/Spc24/Bub1/Phf10/Smarca4/Rad18/Cdc16/Cdk5rap2/Anapc4/Birc5/Hnrnpu/Bcl7c/Tpr/Trip13/Zwilch/Smarcb1/Spdl1/Smarcc1/Rcc2/Cdk1/Rmi2/Ube2c/Sirt1/Smc2/Zwint/Spc25/Chtf18/Actb/Plk1/Incenp/Aurkb/Cdca8/Anapc2/Ncaph2/Ncapg2/Pcid2/BC005624/Tacc3/Csnk2a2/Klhl22/Mad2l1bp/Dync1li1/Ik/Cdca2/Smarce1/Zw10/Kntc1/Haspin/Bub3/Bcl7a/Anapc11/Smarcd3/Anapc7/Bcl7b
GO:0039532	negative regulation of cytoplasmic pattern recognition receptor signaling pathway	58	-0.609395	-1.66622	0.00536524	0.00536524	0.0361936	1873	tags=28%, list=10%, signal=25%	Ifi204/Rnf125/Dhx58/Igtp/Fbxl2/Mndal/Trem2/Irgm2/Irgm1/Trim30a/Ifi203/Ifi207/Ifi208/Ifi206/Ifi213/Ifi209
GO:0070203	regulation of establishment of protein localization to telomere	11	0.795338	1.78904	0.00539123	0.00539123	0.0362808	2822	tags=82%, list=16%, signal=69%	Cct3/Cct7/Cct6a/Tcp1/Cct2/Dkc1/Cct8/Cct5/Cct4
GO:0032645	regulation of granulocyte macrophage colony-stimulating factor production	10	-0.861537	-1.69124	0.00539317	0.00539317	0.0362808	958	tags=60%, list=5%, signal=57%	Rasgrp1/Syk/Il23a/Il17d/Il1b/Cd84
GO:0050729	positive regulation of inflammatory response	133	-0.505977	-1.52113	0.00540196	0.00540196	0.0362895	3382	tags=44%, list=19%, signal=36%	Tnf/Lbp/App/Mefv/Ctsc/Kcnn4/Cebpa/Ptger4/Tac1/Setd4/Ccl24/Ripk1/Il17ra/Casp1/Pde5a/Stat5b/Ccr7/Alox5ap/H2-Q7/H2-D1/Stap1/Tlr2/Adora2b/Grn/Nmi/Plcg2/Il33/Aim2/Stat5a/Gprc5b/Fcgr3/Tlr4/Wnt5a/Casp4/Nlrp3/Ccl3/Trem2/Csf1r/Ctss/Tslp/H2-Q6/Fcer1g/Tnfrsf11a/H2-T23/Pde2a/Camk2n1/Il1b/Cd24a/H2-Q4/Lpl/Il16/Ccr5/Gpr4/Osm/Ccr2/Fcgr1/Fabp4/Cd28
GO:0032816	positive regulation of natural killer cell activation	36	-0.665642	-1.68656	0.0054222	0.0054222	0.0363749	2542	tags=44%, list=14%, signal=38%	Stat5b/H2-Q7/Rasgrp1/H2-D1/Tyk2/Ticam2/Axl/Stat5a/Irf1/Flt3l/Tyrobp/H2-Q6/H2-T23/Il23a/Il15/H2-Q4
GO:0045061	thymic T cell selection	25	-0.707466	-1.67011	0.00544953	0.00544953	0.0365076	2486	tags=40%, list=14%, signal=34%	Ccr7/Gli3/Itpkb/H2-DMa/Card11/Cd74/Dock2/Ptprc/Jag2/Cd28
GO:0019934	cGMP-mediated signaling	26	-0.699328	-1.66309	0.00547171	0.00547171	0.0366055	834	tags=50%, list=5%, signal=48%	Npr2/Adora2b/Pde3a/Npr1/Pde2a/Nos2/Gucy1b1/Gucy1a1/Nppc/Ednrb/Aqp1/Cd36/Kcnc2
GO:0045943	positive regulation of transcription by RNA polymerase I	31	0.618726	1.81178	0.00549825	0.00549825	0.0367323	3373	tags=52%, list=19%, signal=42%	Wdr75/Mybbp1a/Lyar/Ddx21/Ncl/Smarca4/Atf4/Heatr1/Pwp1/Smarca5/Wdr43/Myo1c/Smarcb1/Ppp1r15a/Pih1d1/Carm1
GO:0043583	ear development	198	-0.474988	-1.47645	0.0055604	0.0055604	0.0370962	2375	tags=24%, list=13%, signal=21%	Osr1/Ttc8/Itga8/Lrig1/Vangl2/Gsdme/Slitrk6/Gli3/Ece1/Osr2/Zeb1/Cxcl14/Ifi204/Notch1/Bmp4/Wdr19/Psap/Triobp/Gli2/Dll1/Cys1/Bmp5/Wnt5a/H2-DMa/Ntn1/Rdh10/Lin7a/Ror1/Cebpd/Kcnq4/Gas1/Spry2/Bcl2l11/C1qb/Tbx2/Ednra/H2-T23/Prox1/Fgf10/Tifab/Jag2/Chd7/Gata2/Ripor2/Eya1/Clic5/Tcf15/Stra6
GO:0002724	regulation of T cell cytokine production	40	-0.631927	-1.62237	0.00558788	0.00558788	0.0372127	2574	tags=42%, list=14%, signal=36%	Malt1/H2-Q7/H2-D1/Hfe/B2m/Xcl1/Dennd1b/Vsir/Cd55/Nlrp3/H2-Q6/Il1b/H2-Q4/Lilrb4a/Rsad2/Ccr2/Sash3
GO:0007204	positive regulation of cytosolic calcium ion concentration	148	-0.496871	-1.50637	0.00559324	0.00559324	0.0372127	1877	tags=24%, list=11%, signal=21%	Gja1/Adra1a/Bmp4/Agtr1a/Plcg2/Pml/Itpr3/C3ar1/Ccrl2/Cd55/Cav1/P2rx7/Ccl3/Ric3/Ednra/Ackr4/Cd38/Ptgir/Cx3cr1/Il1b/Esr1/Cd24a/C5ar1/Cxcr4/Cd52/Ccr5/Adcyap1r1/Ccr2/Ednrb/Gata2/Cd36/Trpc3/P2ry1/Kdr/Gimap5
GO:0006760	folic acid-containing compound metabolic process	23	0.651288	1.79556	0.00561924	0.00561924	0.0373343	1485	tags=48%, list=8%, signal=44%	Mthfd1l/Mthfd2/Aldh1l2/Shmt2/Mthfd1/Sardh/Gart/Dhfr/Tyms/Aasdhppt/Atic
GO:0043268	positive regulation of potassium ion transport	37	-0.659161	-1.67459	0.00568179	0.00568179	0.0376981	1707	tags=35%, list=10%, signal=32%	Hbp1/Akap7/Atp1b1/Wnk4/Ank2/Kcnj2/Fhl1/Kcnh2/Trem2/Atp1b2/Edn3/Kcnc2/Lrrc55
GO:0001912	positive regulation of leukocyte mediated cytotoxicity	56	-0.617068	-1.67842	0.00575939	0.00575939	0.0381581	2856	tags=46%, list=16%, signal=39%	Vav1/Tap2/Mr1/Stat5b/H2-Q7/Rasgrp1/H2-D1/Stap1/Hfe/B2m/Lag3/Klrk1/Stat5a/P2rx7/Tyrobp/H2-Q6/H2-T23/Spi1/Il23a/H2-T24/H2-Q4/Mill2/Ptprc/Cadm1/Klrd1/Gimap5
GO:0048663	neuron fate commitment	50	-0.613549	-1.64485	0.00576689	0.00576689	0.0381581	1845	tags=34%, list=10%, signal=31%	Notch1/Bmp4/Gli2/Tfap4/Dll1/Nfib/Bhlhe22/Nfia/Notch3/Casz1/Prox1/Pax7/Lhx6/Jag2/Gata2/Eya1/Dll4
GO:0021782	glial cell development	129	-0.512385	-1.53246	0.00578854	0.00578854	0.038249	2223	tags=26%, list=12%, signal=23%	Abca2/Wasf3/Adam22/Tppp/Tlr2/Cntnap1/Sox11/Grn/Myoc/Dmd/Tlr4/Dll1/Hdac11/Prdm8/Lgi4/Tspan2/Tcf7l2/Ror1/Trem2/C1qa/Csf1r/Gpm6b/Clu/Ntrk2/Plp1/Il1b/C5ar1/Ncmap/Tenm4/Erbb3/Sh3tc2/Nrros/Ano1/Pdgfb
GO:0045066	regulatory T cell differentiation	38	-0.643926	-1.6443	0.00586565	0.00586565	0.0386786	1482	tags=29%, list=8%, signal=27%	Lag3/Vsir/Irf1/Sh2b3/Socs1/Cd46/Il2rg/Lilrb4a/Cd28/Ctla2a/Gimap5
GO:0034976	response to endoplasmic reticulum stress	238	0.329953	1.33347	0.00586956	0.00586956	0.0386786	3828	tags=40%, list=21%, signal=32%	Foxred2/Thbs1/Stc2/Manf/Sdf2l1/Hspa5/Hsp90b1/Hyou1/Thbs4/Pdia6/Fbxo17/Serp1/Creb3l3/Sesn2/Sec61b/Pdia4/Pdia3/Calr/Eif2s1/Dnajc3/Tbl2/Ufm1/Erp29/Bok/Selenos/P4hb/Rcn3/Creb3/Park7/H13/Uba5/Xbp1/Ube2j2/Selenok/Rnf121/Dnajb2/Derl1/Faf1/Eif2b5/Tmed2/Gorasp2/Atf4/Vcp/Flot1/Dnajb9/Eif4g1/Bax/Stub1/Derl2/Nrbf2/Ubxn4/Man1a2/Ubqln1/Aifm1/Usp13/Atf3/Chac1/Ubxn8/Ddrgk1/Ube2j1/Canx/Ccdc47/Ppp1r15b/Usp14/Uggt1…
GO:0001779	natural killer cell differentiation	29	-0.703274	-1.70726	0.00589334	0.00589334	0.0387826	3256	tags=52%, list=18%, signal=42%	Tyro3/Pbx1/Stat5b/Rasgrp1/Mertk/Axl/Sp3/Stat5a/Irf1/Flt3l/Il15/Ikzf1/Prdm1/Pglyrp1/Ptprc
GO:0060541	respiratory system development	234	-0.457389	-1.44001	0.00591204	0.00591204	0.0388528	2026	tags=20%, list=11%, signal=18%	Aldh1a2/Sp3/Zfp157/Tmem67/Notch1/Bmp4/Ccdc40/Sox11/Itga3/Thrb/Gli2/Meg3/Tshz3/Gpc3/Wnt5a/Ccdc39/Nfib/Abca3/Rdh10/Eda/Spry2/Spry1/Pthlh/Tbx2/Hmga2/Epas1/Fgfr4/Igfbp5/Pdgfra/Acvr2b/Fgf10/Ace/Hopx/Hmga1/Fgf1/Nos3/Chd7/Lef1/Gli1/Flt4/Lama5/Ano1/Hhex/Hhip/Eya1/Kdr/Stra6
GO:0060142	regulation of syncytium formation by plasma membrane fusion	30	-0.678878	-1.65754	0.00594422	0.00594422	0.0390112	1783	tags=43%, list=10%, signal=39%	Cxcl12/Myod1/Ehd2/Flt3l/Trem2/Cxcl9/Cxcl10/Tyrobp/Gdf15/Ccl8/Rapgef3/Cd53/Ripor2
GO:0071402	cellular response to lipoprotein particle stimulus	32	-0.68581	-1.69415	0.0059873	0.0059873	0.0392208	1347	tags=38%, list=8%, signal=35%	Mylip/Tlr4/Trem2/Syk/Cd68/Cd9/Fcer1g/Itgb2/Lpl/Abcg1/Cd36/Cdh13
GO:0050878	regulation of body fluid levels	254	-0.459651	-1.45311	0.00599779	0.00599779	0.0392208	2605	tags=26%, list=15%, signal=23%	Gja5/Pip5k1c/Stat5b/Prkcq/Rab27a/Nr1h3/Inpp5k/Mertk/Tspan8/C1qtnf1/Gnas/Enpp4/Axl/Tspan9/Serping1/Prlr/Fbln1/Lyn/Gja1/Mllt6/Ubash3b/P2ry12/Pear1/Stat5a/Emilin2/Wnk4/Alox12/Sh2b3/Tlr4/Vtn/Traf3ip2/Cav1/Ptpn6/Fermt3/Syk/Entpd2/Thbd/Ctns/Cd9/Fcer1g/Nr3c2/Mmp13/Ccnd1/Tec/Pdgfra/Plek/Xdh/Selp/Ptpro/Cfh/Fgf10/Lilrb4a/Tifab/Oas2/Entpd1/Ednrb/Aqp1/Cd36/Ano1/P2ry1/F11r/Pdgfb/Ceacam1/Vwf/Aplnr/Aqp7
GO:0006400	tRNA modification	82	0.439086	1.50585	0.00600048	0.00600048	0.0392208	4311	tags=39%, list=24%, signal=30%	Trmt61a/Pusl1/Yrdc/Nsun2/Pus7/Trmt6/Elp6/Ctu2/Kti12/Dus2/Wdr4/Thumpd1/Dus1l/Mettl2/Elp5/Elp3/Elp1/Qtrt1/Elp4/Urm1/Thg1l/Hsd17b10/Pus1/Osgepl1/Mettl1/Trmt10a/Trmu/Bcdin3d/Mocs3/Trmt10c/Mettl6/Nsun4
GO:0046007	negative regulation of activated T cell proliferation	11	-0.839219	-1.68447	0.00600981	0.00600981	0.0392288	928	tags=55%, list=5%, signal=52%	Rc3h1/Arg1/Lrrc32/Laptm5/Cd274/Lilrb4a
GO:0031023	microtubule organizing center organization	139	0.385956	1.44502	0.00602779	0.00602779	0.0392721	4187	tags=34%, list=23%, signal=26%	Tuba1a/Haus7/Plk2/Nat10/Nubp1/Ranbp1/Sac3d1/Pclaf/Stil/Haus8/Pde4dip/Uxt/Ccnf/Arl2/Plk4/Cdk5rap2/Npm1/Rbm14/Cdk11b/Azin1/Haus6/Nsfl1c/Ccnl1/Ppp1r35/BC034090/Sirt1/Rock2/Brca1/Cep295nl/Nup62/Ccdc42/Plk1/Kat2a/Chmp2a/Haus1/Pdcd6ip/Mark4/Haus2/Pafah1b1/Chek1/Pard6a/D7Ertd443e/Uvrag/Ndel1/Crocc/Bnip2/Chmp1a
GO:0120192	tight junction assembly	62	-0.593188	-1.6283	0.00603408	0.00603408	0.0392721	1616	tags=19%, list=9%, signal=18%	Cldn34c1/Epha2/Snai2/Ramp2/Prkch/Cldn1/Cldn2/Pecam1/F11r/Cdh5/Cldn5/Esam
GO:0006900	vesicle budding from membrane	74	0.446672	1.51931	0.00604081	0.00604081	0.0392721	3726	tags=42%, list=21%, signal=33%	Insig1/Picalm/Trappc6a/Tmed9/Trappc5/Sar1a/Vapa/Trappc4/Sec13/Preb/Trappc3/Gbf1/Sar1b/Sec23a/Tmed10/Chmp6/Snx3/Ap2m1/Sec23b/Trappc6b/Trappc1/Arf1/Arfgap3/Mia3/Arfgap2/Vps4a/Trappc13/Ap3s2/Dnm3/Sec16a/Sec24d
GO:0006487	protein N-linked glycosylation	56	0.525293	1.71218	0.00612902	0.00612902	0.0397921	4082	tags=57%, list=23%, signal=44%	Mlec/Dad1/Ostc/Pgm3/Ddost/Rpn1/Alg5/Nus1/Gfpt2/Dolpp1/Rpn2/Alg9/Ost4/Gorasp1/Alg8/Mgat1/Mgat2/Ube2j1/Uggt1/Fut4/Mogs/Stt3a/Pmm1/Stt3b/Alg2/Dhdds/Gfpt1/B4galt7/Dpm1/Alg14/Entpd5/Magt1
GO:0007599	hemostasis	147	-0.497941	-1.50623	0.00620302	0.00620302	0.0402185	3264	tags=35%, list=18%, signal=29%	F2rl3/Tyro3/Procr/Apoe/Pik3cb/Pros1/Itgb3/Plat/Txk/Anxa7/Pip5k1c/Prkcq/Rab27a/Mertk/Tspan8/C1qtnf1/Gnas/Enpp4/Axl/Tspan9/Serping1/Fbln1/Lyn/Ubash3b/P2ry12/Pear1/Emilin2/Alox12/Sh2b3/Tlr4/Vtn/Cav1/Ptpn6/Fermt3/Syk/Entpd2/Thbd/Cd9/Fcer1g/Tec/Pdgfra/Plek/Selp/Cfh/Lilrb4a/Entpd1/Cd36/P2ry1/F11r/Pdgfb/Ceacam1/Vwf
GO:0032604	granulocyte macrophage colony-stimulating factor production	12	-0.827599	-1.68177	0.00624348	0.00624348	0.0404267	1172	tags=58%, list=7%, signal=55%	Rasgrp1/Slamf9/Syk/Il23a/Il17d/Il1b/Cd84
GO:0001961	positive regulation of cytokine-mediated signaling pathway	54	-0.610404	-1.65165	0.00634016	0.00634016	0.0409978	2173	tags=43%, list=12%, signal=38%	Prkn/Ticam2/Axl/Parp9/Ikbke/Usp27x/Trim6/Rbm47/Igtp/Wnt5a/Casp4/Trem2/Irf7/Irgm2/Irgm1/Tslp/Parp14/Crebrf/Laptm5/Nlrc5/Cd74/Cxcr4/Usp29
GO:0034764	positive regulation of transmembrane transport	201	-0.466322	-1.45106	0.00637212	0.00637212	0.0411495	1898	tags=22%, list=11%, signal=20%	Met/Repin1/Clip3/Bmp4/Irs1/Agtr1a/Akap7/Atp1b1/Plcg2/Wnk4/Ank2/Plcb1/Dmd/Slc38a1/Kcnj2/Gpc3/Gjc2/Cav1/P2rx7/Kcnh2/Trem2/Cxcl9/Ctss/Cxcl10/Ednra/Plp1/Rnasel/Rapgef3/Shank3/Atp1b2/Klf15/Chp2/Adcyap1r1/Abcb1a/Clec4b1/Reln/Erbb3/Trpc3/Edn3/Tesc/Kcnc2/Aplnr/Lrrc55/Gimap5
GO:0030513	positive regulation of BMP signaling pathway	32	-0.684125	-1.68999	0.0064188	0.0064188	0.0413956	1879	tags=41%, list=11%, signal=36%	Kcp/Notch1/Twsg1/Bmp4/Sox11/Foxd1/Tgfbr3/Vsir/Notch2/Gpc3/Scube3/Kdr/Cdh5
GO:0000819	sister chromatid segregation	212	0.344872	1.38661	0.00655692	0.00655692	0.0422301	4932	tags=43%, list=28%, signal=31%	Anapc15/Ran/Nek6/Spc24/Pinx1/Bub1/Flna/Rangrf/Nsl1/Chek2/Phf10/Rrs1/Tubg1/Kpnb1/Smarca4/Cdc16/Cdca5/Cdk5rap2/Spag5/Poldip2/Anapc4/Birc5/Mybl2/Hnrnpu/Smarca5/Bcl7c/Tpr/Trip13/Zwilch/Smarcb1/Tpx2/Nudc/Spdl1/Smarcc1/Cdk1/Mapre1/Rmi2/Bccip/Ube2c/Sirt1/Smc2/Chmp6/Zwint/Ino80/Spc25/Smc3/Nup62/Rab11a/Snhg15/Actb/Kif2a/Plk1/Incenp/Chmp2a/Aurkb/Uhrf1/Vps4a/Cdca8/Anapc2/Seh1l/Kif23/Ncaph2/Ncapg2/Pcid2/Tacc…
GO:0002475	antigen processing and presentation via MHC class Ib	22	-0.724538	-1.65585	0.00656793	0.00656793	0.0422447	2692	tags=45%, list=15%, signal=39%	Tap2/H2-Q7/H2-D1/Hfe/B2m/H2-Q6/H2-T23/H2-T24/H2-Q4/Mill2
GO:0006479	protein methylation	55	0.503496	1.63406	0.00660352	0.00660352	0.042361	2209	tags=36%, list=12%, signal=32%	Fam98a/Gspt1/Ntmt1/Eef1akmt1/Prmt1/Etf1/Comt/Eef1akmt3/Btg2/Kmt5a/Atpsckmt/Prmt5/Snrpd3/N6amt1/Snrpb/Smyd2/Pcmt1/Prmt3/Wdr5/Prmt7
GO:0008213	protein alkylation	55	0.503496	1.63406	0.00660352	0.00660352	0.042361	2209	tags=36%, list=12%, signal=32%	Fam98a/Gspt1/Ntmt1/Eef1akmt1/Prmt1/Etf1/Comt/Eef1akmt3/Btg2/Kmt5a/Atpsckmt/Prmt5/Snrpd3/N6amt1/Snrpb/Smyd2/Pcmt1/Prmt3/Wdr5/Prmt7
GO:0048568	embryonic organ development	431	-0.416296	-1.34733	0.00661234	0.00661234	0.0423614	2991	tags=27%, list=17%, signal=23%	Egfr/Frs2/Klf1/Med12/Hoxd4/Hoxa7/Pbx1/Rara/Junb/Tshz1/Asxl2/Myo6/Ncoa1/Mef2c/Mmp14/Gja5/Sp1/Cc2d2a/Mafb/Spint2/Hoxc4/Tead2/Plac1/Osr1/Slc39a1/Itga8/Lrig1/Vangl2/Ift122/Slitrk6/Gli3/Gnas/Ece1/Hoxa9/Mrtfb/Arnt/Ncoa3/C2cd3/Aldh1a2/Sp3/Osr2/Zeb1/Efna1/Gja1/Notch1/Nr2f2/Sp2/Bmp4/Ccdc40/Wdr19/Uty/Sox11/Smad3/Foxc1/Hoxd9/Triobp/Tmem94/Zfp36l1/Hoxb6/Gli2/Epha2/Sh2b3/Dll1/Prickle2/Bmp5/Hoxa3/Notch2/Wnt5a/…
GO:0010544	negative regulation of platelet activation	16	-0.785652	-1.70405	0.00667567	0.00667567	0.0427105	2209	tags=50%, list=12%, signal=44%	C1qtnf1/Ubash3b/Alox12/Sh2b3/Cd9/Pdgfra/Pdgfb/Ceacam1
GO:0007249	canonical NF-kappaB signal transduction	234	-0.454512	-1.43095	0.0067056	0.0067056	0.0428311	2093	tags=25%, list=12%, signal=22%	Ticam2/Tle1/Card6/Trim5/Arrb2/Bcl3/Traf5/Pink1/Tlr2/Tgm2/Ikbke/Plcg2/Trim6/Trim25/Zc3hav1/Tgfbr3/Trim12c/Gprc5b/Irf1/Trim30d/Tlr4/Igtp/Wnt5a/Trim12a/Clec4d/Trim21/Traf3ip2/Cav1/Tlr3/Eda/Ror1/Traf1/Trem2/Irgm2/Irgm1/Ednra/Defb25/Trim30a/Tifa/Clec4n/Cx3cr1/Trim34a/Il1b/Esr1/Card11/Nfkbid/Cd74/Lilrb4a/Tifab/Nod2/Tlr7/Rassf2/Tnip3/Eda2r/Prkcb/Ednrb/Cd36/Tnfsf10
GO:0032642	regulation of chemokine production	94	-0.54435	-1.56196	0.00671222	0.00671222	0.0428311	1559	tags=29%, list=9%, signal=26%	Il33/Epha2/Snai2/Tlr4/Wnt5a/Tlr3/Mcoln2/Trem2/Syk/Oas1a/Csf1r/Oas1g/Tslp/Defb25/Oas1c/Il1b/Cd24a/Cd74/Lpl/Lilrb4a/Il16/Nod2/Apod/Cd84/Tlr7/Sigirr/Oas3
GO:0046638	positive regulation of alpha-beta T cell differentiation	49	-0.624285	-1.66547	0.00674456	0.00674456	0.0429807	1408	tags=31%, list=8%, signal=28%	Itpkb/Irf1/Hlx/Nlrp3/Socs1/Syk/Il23a/Nckap1l/Il2rg/Nfkbid/Lilrb4a/Ccr2/Sash3/Cd83/Gimap5
GO:0035270	endocrine system development	91	-0.530858	-1.51697	0.00678792	0.00678792	0.0432001	1772	tags=23%, list=10%, signal=21%	Bmp4/Smad3/Gli2/Ly6e/Dll1/Bmp5/Hoxa3/Wnt5a/Tcf7l2/Ednra/Hmga2/Clu/Ctns/Pdgfra/Fgf10/Hmga1/Cdkn1c/Gata2/Gli1/Hhex/Stra6
GO:0051897	positive regulation of phosphatidylinositol 3-kinase/protein kinase B signal transduction	160	-0.489036	-1.50177	0.00681574	0.00681574	0.0433202	2361	tags=29%, list=13%, signal=25%	Mertk/Fgr/Tspyl5/Thpo/C1qtnf1/Agap2/Fyn/Plxnb1/Insr/Axl/Arrb2/Egf/Cxcl12/Irs1/P2ry12/Myoc/Tmem100/Tek/Sema5a/Tcf7l2/Ptpn6/Trem2/Dcn/Spry2/Csf1r/Gcnt2/Gdf15/Ntrk2/Sema4d/Igfbp5/Pdgfra/Cx3cr1/Pik3ap1/Selp/Hcls1/Osm/Akr1c14/Hcst/Cd28/Reln/Flt1/Ngfr/Ramp3/Igf2/Kdr/Pdgfb
GO:0050850	positive regulation of calcium-mediated signaling	45	-0.632788	-1.66054	0.00699098	0.00699098	0.0443757	986	tags=24%, list=6%, signal=23%	Trem2/Syk/Car8/Pdgfra/Cd24a/Chp2/Itgal/Erbb3/Cdh13/Ramp3/Kdr
GO:0000725	recombinational repair	166	0.36595	1.42042	0.00706313	0.00706313	0.0447749	5150	tags=42%, list=29%, signal=30%	Ooep/Ruvbl2/Swi5/Gins2/Mcm5/Xrcc6/Psmd14/Mcm8/Kmt5a/Mcm3/Ube2n/Mcm6/Nucks1/Sfpq/Topbp1/Rad51/Ubqln4/Mcm4/Rbbp8/Sfr1/Rmi2/Polq/Parp1/Gins4/Ruvbl1/Rad54l/Usp51/Brca1/Ino80/Xrcc5/Hdgfl2/Ppp4r2/Actb/Yy1/Tex15/Yeats4/Rpa2/Slx4/Fignl1/Recql/Zfp365/Tonsl/Mcm2/Nsmce1/Chek1/Zswim7/Swsap1/Htatsf1/Morf4l2/Mms22l/Kdm1a/Mcm7/Senp3/Rpa1/Nbn/Dmap1/Cdc45/Fancb/Smchd1/Blm/Helb/Poll/Ep400/Morf4l1/Sem1/Spidr/Chd4/N…
GO:0016053	organic acid biosynthetic process	237	0.327618	1.3302	0.00707832	0.00707832	0.0448124	2758	tags=32%, list=15%, signal=27%	Mif/Fabp5/Ldha/Pkm/Ass1/Fads3/Mthfd1l/Bcat1/Slc1a3/Asns/Agt/Insig1/Ptgs2/Plod2/Phgdh/Ptgis/Eif6/Stard4/Shmt2/Acot7/Hacd1/Mthfd1/Psph/Aldh1a3/Plod3/Mtap/Psat1/Mri1/Hacd2/Ndufab1/Park7/Cad/Lipg/Avpr1a/Tecr/Fasn/Dhfr/Aldh18a1/Rbp1/Pycr2/Got1/Aasdhppt/Chst12/Mecr/Nr1d1/Ptges2/Mcat/Star/Ugdh/Pycr1/Sphk1/Hsd17b12/Bcat2/Anxa1/Prmt3/Gsto1/Acly/Prkag1/Gamt/Fads1/Hao1/Got2/Elovl1/Acadvl/Akr1a1/Per2/Prkab2/…
GO:0072077	renal vesicle morphogenesis	12	0.791402	1.82708	0.00711114	0.00711114	0.0449614	1546	tags=50%, list=9%, signal=46%	Kif26b/Lif/Gdnf/Wnt4/Six2/Sox9
GO:0106380	purine ribonucleotide salvage	13	0.736074	1.73589	0.00714459	0.00714459	0.0451139	2243	tags=62%, list=13%, signal=54%	Ampd1/Ada/Gmpr2/Impdh1/Adsl/Gmps/Impdh2/Aprt
GO:0045216	cell-cell junction organization	174	-0.46866	-1.44211	0.00718099	0.00718099	0.0452846	1378	tags=15%, list=8%, signal=14%	Epha2/Snai2/Jup/Flcn/Cav1/Mtss1/Csf1r/Ramp2/Prkch/Cd9/Il1b/Ptpro/Ace/Hopx/Lims2/Cdh19/Cldn1/Cldn2/Cdh13/Pecam1/F11r/Ceacam1/Aplnr/Cdh5/Cldn5/Esam
GO:0050871	positive regulation of B cell activation	82	-0.554321	-1.58029	0.00724069	0.00724069	0.0456017	2664	tags=30%, list=15%, signal=26%	Vav3/Mef2c/Mmp14/Stat5b/Shld1/Prlr/Tnfsf13/Atp11c/Stat5a/Tlr4/Syk/Gpr183/Cd38/Spi1/Il10/Nckap1l/Il2rg/Card11/Inpp5d/Cd74/Ptprc/Nod2/Sash3/Cd28/Ighm
GO:0060837	blood vessel endothelial cell differentiation	11	-0.830766	-1.6675	0.0072965	0.0072965	0.0458934	2297	tags=64%, list=13%, signal=55%	Lipa/Foxj2/Notch1/Dll1/Tmem100/Prox1/Kdr
GO:0032606	type I interferon production	119	-0.517814	-1.53369	0.00731225	0.00731225	0.0459327	2166	tags=27%, list=12%, signal=24%	Isg15/Ticam2/Tlr2/Ikbke/Rnf125/Nmi/Zbtb20/Plcg2/Dhx58/Zc3hav1/Irf1/Irf9/Tlr4/Igtp/Irf5/Xaf1/Ifih1/Tlr3/Irf7/Syk/Oas1a/Irgm2/Irgm1/Oas1g/Tyrobp/Oas1c/Cd14/Irf8/Oas2/Tlr7/Oas3/Gbp4
GO:0090023	positive regulation of neutrophil chemotaxis	28	-0.67927	-1.64376	0.00732599	0.00732599	0.0459593	1203	tags=50%, list=7%, signal=47%	Mcu/Ccr7/Xcl1/C3ar1/Camk1d/Ednra/Dapk2/Il23a/Il1b/Nckap1l/Cd74/C5ar1/Rac2/Ripor2
GO:0035025	positive regulation of Rho protein signal transduction	36	-0.655498	-1.66086	0.00742257	0.00742257	0.0465049	1168	tags=33%, list=7%, signal=31%	Tek/Mcf2l/Arrb1/Sema4d/Lpar4/Gpr65/Arhgef3/P2ry10/Gpr4/Ngfr/Adgrg1/F11r
GO:0055123	digestive system development	106	-0.526416	-1.54199	0.00745253	0.00745253	0.0466323	2239	tags=25%, list=13%, signal=22%	Vangl2/Gli3/Insr/Aldh1a2/Npr2/Notch1/Ccdc40/Wdr19/Sox11/Smad3/Lgr4/Gli2/Wnt5a/Ccdc39/Hlx/Tcf7l2/Rarb/Klf5/Pdgfra/Acvr2b/Prdm1/Fgf10/Cdkn1c/Ednrb/Kit/Igf2/Stra6
GO:0032607	interferon-alpha production	31	-0.67086	-1.64325	0.0074759	0.0074759	0.046718	1590	tags=26%, list=9%, signal=24%	Nmi/Zc3hav1/Tlr4/Ifih1/Tlr3/Irf7/Tlr7/Gbp4
GO:0032479	regulation of type I interferon production	115	-0.518389	-1.53346	0.00748739	0.00748739	0.0467295	2166	tags=27%, list=12%, signal=24%	Isg15/Ticam2/Tlr2/Ikbke/Rnf125/Nmi/Zbtb20/Plcg2/Dhx58/Zc3hav1/Irf1/Tlr4/Igtp/Irf5/Xaf1/Ifih1/Tlr3/Irf7/Syk/Oas1a/Irgm2/Irgm1/Oas1g/Tyrobp/Oas1c/Cd14/Irf8/Oas2/Tlr7/Oas3/Gbp4
GO:0032602	chemokine production	102	-0.531942	-1.549	0.00758727	0.00758727	0.0472918	1559	tags=27%, list=9%, signal=25%	Il33/Epha2/Snai2/Tlr4/Wnt5a/Slamf9/Tlr3/Mcoln2/Trem2/Syk/Oas1a/Csf1r/Oas1g/Tslp/Defb25/Oas1c/Il1b/Cd24a/Cd74/Lpl/Lilrb4a/Il16/Nod2/Apod/Cd84/Tlr7/Sigirr/Oas3
GO:0060143	positive regulation of syncytium formation by plasma membrane fusion	23	-0.703134	-1.63724	0.00761903	0.00761903	0.0474286	1783	tags=52%, list=10%, signal=47%	Cxcl12/Myod1/Ehd2/Flt3l/Trem2/Cxcl9/Tyrobp/Gdf15/Ccl8/Rapgef3/Cd53/Ripor2
GO:0046849	bone remodeling	88	-0.543225	-1.54998	0.00770188	0.00770188	0.0478827	1942	tags=31%, list=11%, signal=27%	Pdk4/Ptn/Gja1/Acp5/Ubash3b/Ppargc1b/Lgr4/Tpp1/Epha2/Notch2/Tmem64/P2rx7/Syk/Csf1r/Ctss/Mitf/Tnfrsf11a/Cd38/Inpp5d/Rac2/Inpp4b/S1pr1/Lepr/Rassf2/Fcgr4/Dlk1/Ceacam1
GO:0002224	toll-like receptor signaling pathway	64	-0.581839	-1.61021	0.00773175	0.00773175	0.0479101	2095	tags=36%, list=12%, signal=32%	Rab11fip2/Ticam2/Arrb2/Tlr2/Cd86/Lgr4/Unc93b1/Plcg2/Irf1/Tlr4/Tlr3/Irf7/Ly96/Trim30a/Pik3ap1/Cd274/Esr1/Tlr1/Tifab/Tlr7/Tnip3/Cd300a/Cd36
GO:0032815	negative regulation of natural killer cell activation	17	-0.758816	-1.66612	0.0077344	0.0077344	0.0479101	2396	tags=47%, list=13%, signal=41%	H2-Q7/Fgr/H2-D1/H2-Q6/H2-T23/H2-Q4/Lilrb4a/Pglyrp1
GO:0042220	response to cocaine	33	0.578468	1.73444	0.007736	0.007736	0.0479101	817	tags=24%, list=5%, signal=23%	Slc1a2/Htr2a/Slc1a3/Drd4/Ncam1/Comt/Homer1/Cnr1
GO:0035967	cellular response to topologically incorrect protein	92	0.433768	1.5339	0.00779587	0.00779587	0.0482191	3644	tags=38%, list=20%, signal=30%	Stc2/Sdf2l1/Hspa5/Rnf126/Hspd1/Pdia6/Serp1/Eif2s1/Dnajc3/Tbl2/Bok/Selenos/Hspb8/Creb3/Xbp1/Derl1/Tmed2/Atf4/Vcp/Bax/Stub1/Derl2/Bag3/Atf3/Ddrgk1/Ptpn2/Bak1/Dnajb14/Ppp1r15a/Hsf1/Atf6/Erlec1/Cdk5rap3/Herpud1/Serp2
GO:0050855	regulation of B cell receptor signaling pathway	15	-0.789755	-1.68155	0.00782598	0.00782598	0.0483436	2129	tags=53%, list=12%, signal=47%	Stap1/Lyn/Nfam1/Prkch/Lpxn/Cd22/Prkcb/Cd300a
GO:0033013	tetrapyrrole metabolic process	47	0.523935	1.6657	0.00790392	0.00790392	0.0487628	4015	tags=43%, list=23%, signal=33%	Spta1/Mmab/Fxn/Cpox/Tmem14c/Abcb6/Clybl/Hmox1/Alad/Hmbs/Mmadhc/Cox10/Uros/Snx3/Slc11a2/Pgrmc1/Mtr/Hpx/Blvra/Mmachc
GO:0001666	response to hypoxia	199	0.34774	1.37635	0.00792766	0.00792766	0.0487935	838	tags=18%, list=5%, signal=17%	Mgarp/Egln3/Higd1a/Eno1/Fam162a/Pgk1/Bnip3/Eno1b/Ddah1/Ak4/Kcnma1/Cryab/Pdk1/Egln1/Vegfd/Lif/Vegfa/Plk3/Sod3/Eif4ebp1/Hyou1/Ptgis/Nol3/Vasn/Rgcc/Suv39h2/Pdk3/Ajuba/Hif1a/Tbl2/Twist1/Ada/Ddit4/Comt/Pin1/P4hb
GO:0032753	positive regulation of interleukin-4 production	32	-0.67479	-1.66693	0.00792908	0.00792908	0.0487935	2847	tags=44%, list=16%, signal=37%	Rara/Prkcq/H2-Q7/H2-D1/Il33/Nlrp3/Icosl/Syk/H2-Q6/Fcer1g/H2-T23/H2-Q4/Sash3/Cd28
GO:1905564	positive regulation of vascular endothelial cell proliferation	19	-0.76007	-1.71089	0.00795896	0.00795896	0.0488531	381	tags=26%, list=2%, signal=26%	Sp1/Col18a1/Itga4/Nrarp/Igf2
GO:0016045	detection of bacterium	19	-0.760067	-1.71089	0.00795896	0.00795896	0.0488531	2396	tags=47%, list=13%, signal=41%	H2-Q7/H2-D1/Tlr2/H2-Q6/H2-Q4/Tlr1/Pglyrp1/Naip2/Nod2
GO:0010823	negative regulation of mitochondrion organization	54	0.499126	1.61313	0.00802702	0.00802702	0.0492084	1353	tags=20%, list=8%, signal=19%	Higd1a/Bnip3/Ier3/Nol3/Prelid1/Slc25a5/Bok/Slc25a4/Lmna/Fxn/Tspo
GO:0015810	aspartate transmembrane transport	18	0.690622	1.76876	0.00806244	0.00806244	0.049363	296	tags=22%, list=2%, signal=22%	Slc1a6/Slc1a2/Slc1a3/Slc1a4
GO:0032703	negative regulation of interleukin-2 production	22	-0.717577	-1.63994	0.00813971	0.00813971	0.0497163	2327	tags=36%, list=13%, signal=32%	Hdac7/Lag3/Zfp36/Cd34/Laptm5/Lilrb4a/Ptprc/Nod2
GO:0061050	regulation of cell growth involved in cardiac muscle cell development	30	0.584286	1.6965	0.00814294	0.00814294	0.0497163	4321	tags=53%, list=24%, signal=40%	Fdps/Rgs4/Ccn4/Cav3/Pin1/Slc25a4/Ctdp1/Tomm70a/Sirt1/G6pdx/Yy1/Edn1/Ddx39b/Rbm10/Pak1/Foxp1
GO:0008652	amino acid biosynthetic process	51	0.516814	1.66906	0.00815098	0.00815098	0.0497163	2509	tags=47%, list=14%, signal=41%	Ass1/Bcat1/Slc1a3/Asns/Plod2/Phgdh/Shmt2/Mthfd1/Psph/Plod3/Mtap/Psat1/Mri1/Park7/Dhfr/Aldh18a1/Pycr2/Got1/Aasdhppt/Pycr1/Bcat2/Hao1/Got2/Abat
GO:0035272	exocrine system development	46	-0.614534	-1.62494	0.00817707	0.00817707	0.0498126	2080	tags=33%, list=12%, signal=29%	Insr/Tgm2/Met/Twsg1/Ntn4/Foxc1/Snai2/Nfib/Eda/Plxnd1/Fgf10/Bmp7/Lama5/Igf2/Pdgfb
GO:0006874	intracellular calcium ion homeostasis	258	-0.441474	-1.395	0.00824048	0.00824048	0.0501358	1981	tags=20%, list=11%, signal=18%	Stc1/Tgm2/Lyn/Ubash3b/Mcoln1/Xcl1/Atp2b4/Atp1b1/Plcg2/Pml/Ank2/Itpr3/Plcb1/Dmd/Grina/Cln3/Efhc1/Wnt5a/Dmpk/Tmem64/Cav1/P2rx7/Ptpn6/Cxcl9/Cxcl10/Ednra/Slc24a5/Ccl8/Slc8b1/Slc25a27/Npy1r/Coro1a/Atp2a1/Cav2/Inpp4b/Ptprc/Ccr5/Grin2b/Nppc/Ccr2/Prkcb/Chd7/Clec4b1/Atp2a3/Casq2/Trpc3/Edn3/P2ry1/Pln/Aplnr/Cdh5
GO:0050730	regulation of peptidyl-tyrosine phosphorylation	222	-0.45115	-1.41387	0.00825815	0.00825815	0.0501801	2030	tags=25%, list=11%, signal=22%	Dgkq/Arrb2/Tspan9/Egf/Parp9/Lyn/Efna1/Adra1a/Plcg2/Lrp4/Ghr/Il34/Gprc5b/Irf1/Gfra1/Tlr4/Vtn/Cav1/Ptpn6/Trem2/Socs1/Syk/Csf1r/Agrn/Tslp/Cspg4/Socs3/Parp14/Sema4d/Samsn1/Itgb2/Clec4n/Il23a/Il15/Pdgfra/Plpp3/Cd24a/Fgf10/Cd74/Lilrb4a/Cav2/Hcls1/Ptprc/Nod2/Ntf3/Osm/Kitl/Cd300a/Reln/Ighm/Kit/Cd36/Abi3/Pecam1/Pdgfb
GO:0046394	carboxylic acid biosynthetic process	235	0.335965	1.36403	0.00827863	0.00827863	0.0502414	2758	tags=32%, list=15%, signal=27%	Mif/Fabp5/Ldha/Pkm/Ass1/Fads3/Mthfd1l/Bcat1/Slc1a3/Asns/Agt/Insig1/Ptgs2/Plod2/Phgdh/Ptgis/Eif6/Stard4/Shmt2/Acot7/Hacd1/Mthfd1/Psph/Aldh1a3/Plod3/Mtap/Psat1/Mri1/Hacd2/Ndufab1/Park7/Cad/Lipg/Avpr1a/Tecr/Fasn/Dhfr/Aldh18a1/Rbp1/Pycr2/Got1/Aasdhppt/Chst12/Mecr/Nr1d1/Ptges2/Mcat/Star/Ugdh/Pycr1/Sphk1/Hsd17b12/Bcat2/Anxa1/Prmt3/Gsto1/Acly/Prkag1/Gamt/Fads1/Hao1/Got2/Elovl1/Acadvl/Akr1a1/Per2/Prkab2/…
GO:1901136	carbohydrate derivative catabolic process	222	0.33318	1.34217	0.00830441	0.00830441	0.0502785	1079	tags=15%, list=6%, signal=15%	Aldoc/Eno1/Pgk1/Eno1b/Pfkl/Cemip/Slc2a6/Tpi1/Pgam1/Pkm/Gapdh/Gale/Aldoa/Gck/Galk1/Htr2a/Cda/Ier3/Eif6/Fbxo17/Nt5c/Gpi1/Acot7/Nudt19/Dctpp1/Adpgk/Enpp1/Hif1a/Ada/Ddit4/Dut/Dera/Nudt18/Pfkp
GO:0060100	positive regulation of phagocytosis, engulfment	17	-0.756202	-1.66038	0.00831593	0.00831593	0.0502785	2129	tags=47%, list=12%, signal=41%	Stap1/Plcg2/Trem2/Appl2/Nckap1l/Fcgr1/Gata2/Cd36
GO:1905155	positive regulation of membrane invagination	17	-0.756202	-1.66038	0.00831593	0.00831593	0.0502785	2129	tags=47%, list=12%, signal=41%	Stap1/Plcg2/Trem2/Appl2/Nckap1l/Fcgr1/Gata2/Cd36
GO:2001251	negative regulation of chromosome organization	94	0.410752	1.46311	0.00832918	0.00832918	0.0502958	4818	tags=44%, list=27%, signal=32%	Anapc15/Nat10/Spc24/Pinx1/Bub1/Naa10/Cdk5rap2/Birc5/Hnrnpu/Smarca5/Ercc1/Tpr/Trip13/Zwilch/Spdl1/Parp1/Zwint/Spc25/Plk1/Incenp/H3f3b/Slx4/Aurkb/Cdca8/Trp53/Mcm2/Mnat1/Pcid2/Klhl22/Mad2l1bp/Hnrnpc/Top2a/Nbn/Dync1li1/Ik/Zw10/Kntc1/Baz1b/Mcrs1/Haspin/Bub3
GO:0030032	lamellipodium assembly	69	-0.58662	-1.64627	0.00837991	0.00837991	0.0504593	565	tags=16%, list=3%, signal=15%	Fgd4/Ptpro/Rac2/Ablim1/S1pr1/Parvb/Kit/Aqp1/Cdh13/Abi3/Ablim3
GO:0036303	lymph vessel morphogenesis	23	-0.701574	-1.63361	0.0083864	0.0083864	0.0504593	1859	tags=39%, list=10%, signal=35%	Vegfc/Foxc1/Epha2/Clec14a/Prox1/Acvr2b/Flt4/Sox18/Tie1
GO:1905818	regulation of chromosome separation	66	0.455209	1.53331	0.00838756	0.00838756	0.0504593	4916	tags=48%, list=28%, signal=35%	Anapc15/Spc24/Bub1/Cdc16/Cdk5rap2/Birc5/Tpr/Trip13/Zwilch/Spdl1/Ube2c/Smc2/Zwint/Spc25/Plk1/Incenp/Aurkb/Cdca8/Ncaph2/Ncapg2/Pcid2/Csnk2a2/Klhl22/Mad2l1bp/Dync1li1/Ik/Zw10/Kntc1/Haspin/Bub3/Anapc11/Anapc7
GO:0007094	mitotic spindle assembly checkpoint signaling	44	0.54732	1.73322	0.00846719	0.00846719	0.0507433	4818	tags=55%, list=27%, signal=40%	Anapc15/Spc24/Bub1/Cdk5rap2/Birc5/Tpr/Trip13/Zwilch/Spdl1/Zwint/Spc25/Plk1/Incenp/Aurkb/Cdca8/Pcid2/Klhl22/Mad2l1bp/Dync1li1/Ik/Zw10/Kntc1/Haspin/Bub3
GO:0071173	spindle assembly checkpoint signaling	44	0.54732	1.73322	0.00846719	0.00846719	0.0507433	4818	tags=55%, list=27%, signal=40%	Anapc15/Spc24/Bub1/Cdk5rap2/Birc5/Tpr/Trip13/Zwilch/Spdl1/Zwint/Spc25/Plk1/Incenp/Aurkb/Cdca8/Pcid2/Klhl22/Mad2l1bp/Dync1li1/Ik/Zw10/Kntc1/Haspin/Bub3
GO:0042476	odontogenesis	98	-0.527779	-1.52712	0.00847718	0.00847718	0.0507433	2575	tags=29%, list=14%, signal=25%	Lamb1/Atf2/Osr1/Rogdi/Gli3/Osr2/Bmp4/Foxc1/Lrp4/Gli2/Dll1/Tcf7l2/Eda/Cd34/Gas1/Bcl2l11/Ednra/Pdgfra/Acvr2b/Wnt6/Fgf10/Jag2/Ssu2/Bmp7/Lef1/Ngfr/Lama5/Itga6
GO:0034620	cellular response to unfolded protein	78	0.442349	1.52683	0.00848711	0.00848711	0.0507433	3644	tags=40%, list=20%, signal=32%	Stc2/Hspa5/Hspd1/Pdia6/Serp1/Eif2s1/Dnajc3/Tbl2/Bok/Selenos/Hspb8/Creb3/Xbp1/Derl1/Tmed2/Atf4/Bax/Stub1/Derl2/Bag3/Atf3/Ddrgk1/Ptpn2/Bak1/Ppp1r15a/Hsf1/Atf6/Erlec1/Cdk5rap3/Herpud1/Serp2
GO:1904851	positive regulation of establishment of protein localization to telomere	10	0.817244	1.81463	0.00848721	0.00848721	0.0507433	2822	tags=90%, list=16%, signal=76%	Cct3/Cct7/Cct6a/Tcp1/Cct2/Dkc1/Cct8/Cct5/Cct4
GO:0052652	cyclic purine nucleotide metabolic process	25	-0.694513	-1.63953	0.00855525	0.00855525	0.0510869	1943	tags=36%, list=11%, signal=32%	Pde5a/Npr2/Adcy4/Epha2/Npr1/Pde2a/Gucy1b1/Gucy1a1/Nppc
GO:0030970	retrograde protein transport, ER to cytosol	26	0.652308	1.84199	0.00864155	0.00864155	0.0514752	4099	tags=65%, list=23%, signal=50%	Sec61b/Selenos/H13/Derl1/Vcp/Derl2/Ube2j1/Edem1/Bcap31/Ube2g2/Erlec1/Sel1l/Herpud1/Faf2/Syvn1/Ufd1/Edem2
GO:1903513	endoplasmic reticulum to cytosol transport	26	0.652308	1.84199	0.00864155	0.00864155	0.0514752	4099	tags=65%, list=23%, signal=50%	Sec61b/Selenos/H13/Derl1/Vcp/Derl2/Ube2j1/Edem1/Bcap31/Ube2g2/Erlec1/Sel1l/Herpud1/Faf2/Syvn1/Ufd1/Edem2
GO:0061082	myeloid leukocyte cytokine production	60	-0.585599	-1.60141	0.00866323	0.00866323	0.0515408	2093	tags=37%, list=12%, signal=32%	Ticam2/Axl/Tlr2/Acp5/Plcg2/Gprc5b/Tlr4/Wnt5a/Casp4/Tlr3/P2rx7/Nlrp3/Syk/Fcer1g/Laptm5/Il1b/Cd74/Nod2/Tlr7/Spon2/Kit/Cd36
GO:0048729	tissue morphogenesis	569	-0.400208	-1.29775	0.00868937	0.00868937	0.0516101	2519	tags=22%, list=14%, signal=20%	Pik3cd/Camsap3/Clasp2/Alms1/Nrp1/Spint2/Tead2/Adarb1/Apaf1/Lamc1/Osr1/Ttc8/Mdm4/Stard13/Arhgap24/Vangl2/Ift122/Rreb1/Gli3/Ophn1/Ncoa3/C2cd3/Aldh1a2/Pxn/Stc1/Egf/Tmem67/Tgm2/Met/Gja1/Vegfc/Notch1/Twsg1/Cxcl12/Bmp4/Ccdc40/Ntn4/Sox11/Smad3/Foxc1/Lgr4/Mmp2/Ttn/Agtr1a/Foxd1/Stat5a/Wnk4/Tgfbr3/Pml/Col4a1/Tctn1/Gli2/Epha2/Ly6e/Adamts12/Snai2/Alox12/Dll1/Cd151/Bmp5/Map3k1/Tmem100/Notch2/Gpc3/Wnt5a/Tek/Cc…
GO:0060759	regulation of response to cytokine stimulus	144	-0.484149	-1.46622	0.00869622	0.00869622	0.0516101	2173	tags=30%, list=12%, signal=26%	Prkn/Isg15/Stap1/Ticam2/Axl/Tlr2/Parp9/Ikbke/Padi2/Usp27x/Trim6/Rffl/Sh2b3/Tlr4/Rbm47/Igtp/Wnt5a/Casp4/Cav1/Ifih1/Trem2/Irf7/Ccdc3/Syk/Oas1a/Irgm2/Stat2/Irgm1/Oas1g/Tslp/Parp14/Crebrf/Oas1c/Laptm5/Nlrc5/Cd24a/Cd74/Cxcr4/Naip2/Ptprc/Usp29/Sigirr/Oas3
GO:0009127	purine nucleoside monophosphate biosynthetic process	22	0.653149	1.80578	0.00879449	0.00879449	0.0521294	2243	tags=50%, list=13%, signal=44%	Ampd1/Ada/Gart/Gmpr2/Atic/Impdh1/Nudt2/Adsl/Gmps/Impdh2/Aprt
GO:0051310	metaphase chromosome alignment	92	0.43015	1.52111	0.0088353	0.0088353	0.0523072	4818	tags=45%, list=27%, signal=33%	Spc24/Pinx1/Nsl1/Rrs1/Kpnb1/Cdca5/Fam83d/Spag5/Birc5/Hnrnpu/Nudc/Spdl1/Rcc2/Mapre1/Sirt1/Chmp6/Zwint/Spc25/Pmf1/Nup62/Rab11a/Snhg15/Incenp/Chmp2a/Aurkb/Vps4a/Cdca8/Seh1l/Cdc42/Ttl/Mlh1/Chmp1a/Dctn2/Chmp7/Eml4/Dync1h1/Cenpq/Zw10/Abraxas2/Racgap1/Bub3
GO:0034728	nucleosome organization	64	0.498739	1.6893	0.00889177	0.00889177	0.0523982	3654	tags=47%, list=20%, signal=37%	Nasp/Grwd1/Anp32b/Spty2d1/Pole3/Chaf1b/Smarca4/Sox9/Asf1b/Npm1/Baz1a/Nap1l4/Smarca5/Dnajc9/Smyd3/Chaf1a/Sart3/Smarcb1/Ssrp1/Smarcc1/Set/Brd2/Chd1/Nap1l1/Tspyl2/Nap1l5/Supt6/Hat1/Mcm2/Chrac1
GO:0033865	nucleoside bisphosphate metabolic process	89	0.427245	1.51477	0.00889401	0.00889401	0.0523982	4735	tags=48%, list=27%, signal=36%	Hmgcs1/Mvd/Pdk1/Dgat2/Slc27a3/Mvk/Hmgcr/Acot7/Nudt19/Pdk3/Enpp1/Pmvk/Acot4/Acot1/Fasn/Mpc1/Vdac1/Suclg1/Acsl4/Acly/Mpc2/Papss1/Dlat/Sucla2/Acsl1/Gpat4/Cs/Dcakd/Slc25a16/Gcdh/Acot8/Pank1/Fitm2/Acot11/Acss2/Acsl5/Acot9/Acat1/Papss2/Acaca/Ogdh/Ppcs/Coasy
GO:0033875	ribonucleoside bisphosphate metabolic process	89	0.427245	1.51477	0.00889401	0.00889401	0.0523982	4735	tags=48%, list=27%, signal=36%	Hmgcs1/Mvd/Pdk1/Dgat2/Slc27a3/Mvk/Hmgcr/Acot7/Nudt19/Pdk3/Enpp1/Pmvk/Acot4/Acot1/Fasn/Mpc1/Vdac1/Suclg1/Acsl4/Acly/Mpc2/Papss1/Dlat/Sucla2/Acsl1/Gpat4/Cs/Dcakd/Slc25a16/Gcdh/Acot8/Pank1/Fitm2/Acot11/Acss2/Acsl5/Acot9/Acat1/Papss2/Acaca/Ogdh/Ppcs/Coasy
GO:0034032	purine nucleoside bisphosphate metabolic process	89	0.427245	1.51477	0.00889401	0.00889401	0.0523982	4735	tags=48%, list=27%, signal=36%	Hmgcs1/Mvd/Pdk1/Dgat2/Slc27a3/Mvk/Hmgcr/Acot7/Nudt19/Pdk3/Enpp1/Pmvk/Acot4/Acot1/Fasn/Mpc1/Vdac1/Suclg1/Acsl4/Acly/Mpc2/Papss1/Dlat/Sucla2/Acsl1/Gpat4/Cs/Dcakd/Slc25a16/Gcdh/Acot8/Pank1/Fitm2/Acot11/Acss2/Acsl5/Acot9/Acat1/Papss2/Acaca/Ogdh/Ppcs/Coasy
GO:0050798	activated T cell proliferation	44	-0.62616	-1.63295	0.00898716	0.00898716	0.0528826	1827	tags=32%, list=10%, signal=29%	Cd86/Stat5a/Satb1/Icosl/Lrrc32/Tnfsf9/Laptm5/Itgb2/Il23a/Cd274/Cd24a/Lilrb4a/Itgal/Igf2
GO:0072676	lymphocyte migration	98	-0.525968	-1.52188	0.00902117	0.00902117	0.0529073	1891	tags=31%, list=11%, signal=28%	Cxcl14/Cxcl12/Padi2/Xcl1/Lrch1/Cd200/Wnt5a/Ccl4/Ccl3/Cxcl10/Gpr183/Itgb7/Ccl8/Slc8b1/Dock8/Coro1a/Spns2/Jam2/Ch25h/Apod/S1pr1/Ccl6/Itga4/Itgal/Ccr2/Ccl11/Cadm1/Ccl12/Ripor2/F11r
GO:0000070	mitotic sister chromatid segregation	174	0.351907	1.37614	0.00902325	0.00902325	0.0529073	4916	tags=43%, list=28%, signal=32%	Anapc15/Ran/Spc24/Pinx1/Bub1/Flna/Rangrf/Nsl1/Chek2/Rrs1/Tubg1/Kpnb1/Cdc16/Cdca5/Cdk5rap2/Spag5/Poldip2/Birc5/Mybl2/Hnrnpu/Smarca5/Tpr/Trip13/Zwilch/Tpx2/Nudc/Spdl1/Cdk1/Mapre1/Bccip/Ube2c/Sirt1/Smc2/Chmp6/Zwint/Ino80/Spc25/Smc3/Nup62/Rab11a/Snhg15/Kif2a/Plk1/Incenp/Chmp2a/Aurkb/Uhrf1/Vps4a/Cdca8/Seh1l/Kif23/Ncaph2/Ncapg2/Pcid2/Aaas/Rhoa/Klhl22/Mad2l1bp/Chmp1a/Dctn2/Chmp7/Eml4/Dync1li1/Ik/Zw10/Kn…
GO:0045577	regulation of B cell differentiation	34	-0.662128	-1.65251	0.00902417	0.00902417	0.0529073	1594	tags=41%, list=9%, signal=38%	Atp11c/Zfp36l1/Stat5a/Nfam1/Ptpn6/Syk/Spi1/Il10/Nckap1l/Cd24a/Il2rg/Card11/Inpp5d/Lilrb4a
GO:0009067	aspartate family amino acid biosynthetic process	17	0.67976	1.72931	0.00905417	0.00905417	0.0530076	4026	tags=76%, list=23%, signal=59%	Asns/Plod2/Mthfd1/Plod3/Mtap/Mri1/Got1/Aasdhppt/Got2/Apip/Mthfd2l/Mtr/Aass
GO:0009124	nucleoside monophosphate biosynthetic process	39	0.549691	1.70113	0.00906321	0.00906321	0.0530076	2243	tags=49%, list=13%, signal=43%	Nme1/Cda/Uck2/Nme2/Ampd1/Ada/Dut/Cad/Gart/Tyms/Umps/Gmpr2/Atic/Impdh1/Nudt2/Adsl/Gmps/Impdh2/Aprt
GO:0002863	positive regulation of inflammatory response to antigenic stimulus	24	-0.70528	-1.65441	0.00910017	0.00910017	0.0531595	2486	tags=46%, list=14%, signal=40%	Ccr7/H2-Q7/H2-D1/Fcgr3/H2-Q6/Fcer1g/H2-T23/Cd24a/H2-Q4/Fcgr1/Cd28
GO:0060601	lateral sprouting from an epithelium	11	-0.825341	-1.65661	0.00913591	0.00913591	0.0533039	2239	tags=55%, list=13%, signal=48%	Vangl2/Bmp4/Gli2/Wnt5a/Fgf10/Bmp7
GO:0050000	chromosome localization	107	0.40592	1.45756	0.0092133	0.0092133	0.0536907	4818	tags=41%, list=27%, signal=30%	Spc24/Pinx1/Lmna/Nsl1/Rrs1/Kpnb1/Cdca5/Fam83d/Spag5/Actr3/Birc5/Hnrnpu/Nudc/Spdl1/Rcc2/Mapre1/Sirt1/Chmp6/Zwint/Spc25/Pmf1/Nup62/Rab11a/Snhg15/Incenp/Chmp2a/Aurkb/Vps4a/Cdca8/Seh1l/Cdc42/Ttl/Ndel1/Mlh1/Chmp1a/Dctn2/Chmp7/Eml4/Dync1h1/Cenpq/Zw10/Abraxas2/Racgap1/Bub3
GO:1903319	positive regulation of protein maturation	25	0.628505	1.76425	0.00922977	0.00922977	0.053722	906	tags=32%, list=5%, signal=30%	Eno1/Eno1b/Bag2/Myh9/Timm17a/Spon1/Tfr2/Timm23
GO:0055094	response to lipoprotein particle	29	-0.691154	-1.67784	0.00929123	0.00929123	0.0540056	1347	tags=38%, list=8%, signal=35%	Mylip/Tlr4/Trem2/Syk/Cd68/Cd9/Fcer1g/Itgb2/Lpl/Cd36/Cdh13
GO:0070372	regulation of ERK1 and ERK2 cascade	267	-0.439455	-1.39213	0.00930083	0.00930083	0.0540056	2143	tags=24%, list=12%, signal=22%	Ddr2/Ece1/Shc1/Arrb2/Egf/Tlr2/Fbln1/Lyn/Notch1/Dab2/Cxcl12/Adra1a/Bmp4/Xcl1/Spred2/Dynlt1b/P2ry6/Gpnmb/Dmd/Epha2/Akap12/Tlr4/Flcn/Mturn/Notch2/Tek/Ccl4/Sema6a/Cav1/Ccl3/Ptpn6/Ndrg2/Trem2/Arrb1/Syk/Spry2/Spry1/Csf1r/Gpr183/Ednra/Gcnt2/Ccl8/Fgfr4/Pdgfra/Il1b/Esr1/Fgf10/Cd74/C5ar1/Cxcr4/Pde8b/Ptprc/Nod2/Fgf1/Ccl6/Ccl11/Ccl12/Flt4/Cd36/Ramp3/P2ry1/Kdr/Pdgfb/Ceacam1/Ptprr
GO:0032878	regulation of establishment or maintenance of cell polarity	24	-0.704343	-1.65221	0.0095361	0.0095361	0.0552449	2883	tags=42%, list=16%, signal=35%	Rufy3/Rictor/Krit1/Llgl1/Gsn/Tek/Shtn1/Dock8/Ripor2/Cdh5
GO:0008217	regulation of blood pressure	163	-0.46909	-1.43944	0.00953712	0.00953712	0.0552449	1877	tags=21%, list=11%, signal=19%	Gja1/Vegfc/Nr2f2/Adra1a/Smad3/Agtr1a/Wnk4/Ptgs1/Dll1/C3ar1/Ncf2/Ramp2/Ednra/Npr1/Enpep/Nr3c2/Npy1r/Ahr/Camk2n1/Ptpro/Nos2/Ace/Gucy1a1/Nos3/Ptafr/Abcc9/Ednrb/Atp1a2/Edn3/Kcnj8/Nav2/F11r/Kdr/Pdgfb/Agtr2
GO:0003002	regionalization	342	-0.427102	-1.36633	0.00955441	0.00955441	0.0552577	3104	tags=25%, list=17%, signal=21%	Tbx6/Pld6/Cdon/Hoxc6/Frs2/Nrp2/Ep300/Med12/Hoxd4/Hoxa7/Ttc21b/Pbx1/Abi1/Tshz1/Dync2h1/Mef2c/Cc2d2a/Mafb/Nrp1/Hoxc4/Gpr161/Osr1/Bicc1/Vangl2/Ift122/Gli3/Hoxa9/C2cd3/Enkur/Aldh1a2/Tmem67/Gja1/Notch1/Tbc1d32/Nr2f2/Hoxd8/Bmp4/Ccdc40/Wdr19/Smad3/Foxc1/Ttn/Hoxd9/Foxd1/Hoxb6/Lrp4/Tctn1/Cfap45/Gli2/Nbl1/Sema3f/Dll1/Hoxa3/Notch2/Gpc3/Wnt5a/Ccdc39/Ptch1/Robo2/Gas1/C1qa/Spry1/Bhlhe22/Tbx2/Hoxb7/Ednra/Meox2/…
GO:0032819	positive regulation of natural killer cell proliferation	19	-0.753386	-1.69585	0.00956218	0.00956218	0.0552577	2542	tags=53%, list=14%, signal=45%	Stat5b/H2-Q7/H2-D1/Tyk2/Flt3l/H2-Q6/H2-T23/Il23a/Il15/H2-Q4
GO:1901532	regulation of hematopoietic progenitor cell differentiation	39	-0.639825	-1.64009	0.0095896	0.0095896	0.0553501	1845	tags=26%, list=10%, signal=23%	Notch1/Foxc1/Zfp36/Flcn/Spi1/Kitl/Gata2/Flt1/Kdr/Tcf15
GO:0044406	adhesion of symbiont to host	12	-0.817147	-1.66053	0.0096379	0.0096379	0.0555611	1132	tags=50%, list=6%, signal=47%	Scarb1/Gbp7/Gbp2/Gbp3/Gbp6/Gbp9
GO:0098883	synapse pruning	13	-0.799481	-1.65866	0.00964913	0.00964913	0.0555611	986	tags=46%, list=6%, signal=44%	Trem2/C1qa/C1qc/C1qb/Cx3cr1/Plxnc1
GO:0042026	protein refolding	23	0.62956	1.73566	0.00968876	0.00968876	0.0557031	2364	tags=48%, list=13%, signal=42%	Cryab/Hspa5/Hspb1/Hspd1/Hsp90aa1/Hspa9/Dnajb2/Hspa2/Hspa13/Hspa8/Dnaja2
GO:0070129	regulation of mitochondrial translation	26	0.647011	1.82703	0.00969969	0.00969969	0.0557031	4311	tags=62%, list=24%, signal=47%	Shmt2/C1qbp/Tsfm/Rcc1l/Coa3/Uqcc2/Mpv17l2/Mtg2/Rpusd3/Mrps27/Taco1/Malsu1/Mtg1/Trmt10c/Lrpprc/Nsun4
GO:0010522	regulation of calcium ion transport into cytosol	17	-0.750511	-1.64788	0.00971158	0.00971158	0.0557031	1772	tags=41%, list=10%, signal=37%	Bmp4/Pml/Cav1/P2rx7/Adcyap1r1/Trpc3/Gimap5
GO:0007600	sensory perception	340	-0.420241	-1.34345	0.00971986	0.00971986	0.0557031	2792	tags=22%, list=16%, signal=19%	Col6a1/Slc52a3/Spata7/Dmxl2/Dram2/Myo6/Disc1/Crybb3/Bbs2/Zfhx2/Alms1/B3gnt2/Grm8/Ttc8/Lrig1/Gsdme/Fyn/Crybg3/Slitrk6/Gnas/Rpgr/Hexb/Arrb2/B2m/Kcnip3/Npr2/Cln6/Cxcl12/Psap/Ppt1/Triobp/Thrb/Mgll/Itpr3/Mme/Snai2/Tlr4/Tshz3/Tmem100/Reep2/Sema5a/P2rx7/Rdh10/Ror1/Espn/Best1/Cdc14a/Kcnq4/Rpgrip1/Arrb1/Spry2/Epas1/Retreg1/Kcna1/Npy1r/Spns2/Rtp4/Cfh/Cxcr4/Grin2b/Gjc3/Ccr2/Jag2/Chd7/Lef1/Ripor2/Kit/Rtp3/Aq…
GO:0001946	lymphangiogenesis	20	-0.741337	-1.67115	0.00974622	0.00974622	0.0557222	1859	tags=45%, list=10%, signal=40%	Vegfc/Foxc1/Epha2/Clec14a/Prox1/Acvr2b/Flt4/Sox18/Tie1
GO:0032817	regulation of natural killer cell proliferation	20	-0.741074	-1.67056	0.00974622	0.00974622	0.0557222	2542	tags=50%, list=14%, signal=43%	Stat5b/H2-Q7/H2-D1/Tyk2/Flt3l/H2-Q6/H2-T23/Il23a/Il15/H2-Q4
GO:0001916	positive regulation of T cell mediated cytotoxicity	32	-0.669433	-1.6537	0.00976299	0.00976299	0.0557362	2692	tags=44%, list=15%, signal=37%	Tap2/Mr1/H2-Q7/H2-D1/Hfe/B2m/P2rx7/H2-Q6/H2-T23/Il23a/H2-T24/H2-Q4/Mill2/Ptprc
GO:0045589	regulation of regulatory T cell differentiation	34	-0.660903	-1.64945	0.00977173	0.00977173	0.0557362	1482	tags=32%, list=8%, signal=30%	Lag3/Vsir/Irf1/Sh2b3/Socs1/Cd46/Il2rg/Lilrb4a/Cd28/Ctla2a/Gimap5
GO:0002369	T cell cytokine production	50	-0.597048	-1.60061	0.00983756	0.00983756	0.0560456	2574	tags=36%, list=14%, signal=31%	Malt1/H2-Q7/H2-D1/Hfe/B2m/Xcl1/Dennd1b/Vsir/Cd55/Nlrp3/H2-Q6/Il1b/H2-Q4/Lilrb4a/Slc11a1/Rsad2/Ccr2/Sash3
GO:0070374	positive regulation of ERK1 and ERK2 cascade	184	-0.465761	-1.43863	0.00992466	0.00992466	0.0564753	2039	tags=26%, list=11%, signal=23%	Shc1/Arrb2/Egf/Tlr2/Notch1/Cxcl12/Adra1a/Bmp4/Xcl1/P2ry6/Gpnmb/Akap12/Tlr4/Mturn/Notch2/Tek/Ccl4/Ccl3/Trem2/Arrb1/Spry2/Csf1r/Gpr183/Ednra/Gcnt2/Ccl8/Fgfr4/Pdgfra/Il1b/Esr1/Fgf10/Cd74/C5ar1/Cxcr4/Pde8b/Ptprc/Nod2/Fgf1/Ccl6/Ccl11/Ccl12/Flt4/Cd36/Ramp3/P2ry1/Kdr/Pdgfb
GO:0006356	regulation of transcription by RNA polymerase I	41	0.536685	1.68605	0.00995074	0.00995074	0.0565572	3373	tags=46%, list=19%, signal=38%	Wdr75/Prr7/Mybbp1a/Lyar/Flna/Ddx21/Ncl/Smarca4/Atf4/Heatr1/Pwp1/Smarca5/Wdr43/Myo1c/Smarcb1/Zmpste24/Ppp1r15a/Pih1d1/Carm1
GO:1903306	negative regulation of regulated secretory pathway	25	-0.688703	-1.62582	0.00997203	0.00997203	0.0566117	661	tags=24%, list=4%, signal=23%	Notch1/Spi1/Nckap1l/Cd84/Ccr2/Cd300a
GO:0050685	positive regulation of mRNA processing	34	0.555656	1.68043	0.0100177	0.0100177	0.0566879	3547	tags=47%, list=20%, signal=38%	Prdx6/Wdr77/Ncl/Eif4a3/Ncbp1/Eif1/Prmt5/Rbm3/Rbmx/Prpf19/Hspa8/Upf3a/Dazap1/Clns1a/Sf3b4/Upf1
GO:0050854	regulation of antigen receptor-mediated signaling pathway	55	-0.606272	-1.64492	0.0100193	0.0100193	0.0566879	2574	tags=31%, list=14%, signal=27%	Malt1/Ccr7/Lipa/Stap1/Lyn/Nfam1/Ptpn6/Ubash3a/Prkch/Laptm5/Lpxn/Card11/Lilrb4a/Cd22/Ptprc/Prkcb/Cd300a
GO:0000724	double-strand break repair via homologous recombination	162	0.361047	1.38928	0.0100263	0.0100263	0.0566879	5150	tags=41%, list=29%, signal=30%	Ooep/Ruvbl2/Swi5/Gins2/Mcm5/Psmd14/Mcm8/Kmt5a/Mcm3/Ube2n/Mcm6/Nucks1/Sfpq/Topbp1/Rad51/Ubqln4/Mcm4/Rbbp8/Sfr1/Rmi2/Polq/Parp1/Gins4/Ruvbl1/Rad54l/Usp51/Brca1/Ino80/Hdgfl2/Ppp4r2/Actb/Yy1/Tex15/Yeats4/Rpa2/Slx4/Fignl1/Recql/Zfp365/Tonsl/Mcm2/Nsmce1/Chek1/Zswim7/Swsap1/Htatsf1/Morf4l2/Mms22l/Kdm1a/Mcm7/Senp3/Rpa1/Nbn/Dmap1/Cdc45/Fancb/Smchd1/Blm/Helb/Poll/Ep400/Morf4l1/Sem1/Spidr/Chd4/Nabp2/Actl6a
GO:0070527	platelet aggregation	51	-0.616478	-1.65325	0.0100324	0.0100324	0.0566879	2561	tags=43%, list=14%, signal=37%	Pip5k1c/Prkcq/C1qtnf1/Gnas/Tspan9/Lyn/Ubash3b/P2ry12/Pear1/Emilin2/Alox12/Sh2b3/Ptpn6/Fermt3/Syk/Cd9/Pdgfra/Plek/Cfh/Entpd1/F11r/Ceacam1
GO:0034103	regulation of tissue remodeling	71	-0.556639	-1.5532	0.0100441	0.0100441	0.0566879	2143	tags=32%, list=12%, signal=29%	Ddr2/Gpr137b/Pdk4/Gja1/Ubash3b/Ppargc1b/Gpnmb/Ypel4/Tmem64/P2rx7/Syk/Csf1r/Tnfrsf11a/Cd38/Cd24a/Inpp5d/Inpp4b/S1pr1/Lepr/Flt4/Fcgr4/Dlk1/Ceacam1
GO:0051057	positive regulation of small GTPase mediated signal transduction	83	-0.551932	-1.57067	0.0101414	0.0101414	0.0571704	1845	tags=30%, list=10%, signal=27%	Notch1/Itpkb/Dynlt1a/Dynlt1b/Dynlt1c/Lrp4/Notch2/Tek/Mcf2l/Arrb1/Agrn/Sema4d/Lpar4/Fgf10/Gpr65/Arhgef3/Dock2/P2ry10/Adcyap1r1/Gpr4/Kitl/Reln/Ngfr/Adgrg1/F11r
GO:0045639	positive regulation of myeloid cell differentiation	101	-0.525573	-1.52966	0.0101842	0.0101842	0.0572619	2875	tags=34%, list=16%, signal=28%	Ripk1/Itgb3/Stat1/Asxl2/Fos/Stat5b/Thpo/Ccl9/Isg15/Gnas/Foxo3/Ppargc1b/Zfp36l1/Stat5a/Il34/Mturn/Notch2/Tmem64/Ccl3/Trem2/Csf1r/Tyrobp/Tnfrsf11a/Il23a/Ikzf1/Nckap1l/Inpp5d/Cd74/Hcls1/Kitl/Gata2/Lef1/Tesc/Dlk1
GO:1903236	regulation of leukocyte tethering or rolling	15	-0.778342	-1.65725	0.0102155	0.0102155	0.0572619	668	tags=40%, list=4%, signal=39%	Cxcl12/Sele/Selp/Itga4/Ccr2/Ptafr
GO:0042092	type 2 immune response	42	-0.624497	-1.6163	0.0102337	0.0102337	0.0572619	1993	tags=33%, list=11%, signal=30%	Bcl3/Xcl1/Dennd1b/Il33/Irf1/Hlx/Traf3ip2/Nlrp3/Batf/Cd74/Lilrb4a/Nod2/Rsad2/Ccr2
GO:0002370	natural killer cell cytokine production	11	-0.823637	-1.65319	0.0102396	0.0102396	0.0572619	739	tags=55%, list=4%, signal=52%	H2-Q7/H2-D1/H2-Q6/H2-T23/H2-Q4/Gimap5
GO:0002727	regulation of natural killer cell cytokine production	11	-0.823637	-1.65319	0.0102396	0.0102396	0.0572619	739	tags=55%, list=4%, signal=52%	H2-Q7/H2-D1/H2-Q6/H2-T23/H2-Q4/Gimap5
GO:0002729	positive regulation of natural killer cell cytokine production	11	-0.823637	-1.65319	0.0102396	0.0102396	0.0572619	739	tags=55%, list=4%, signal=52%	H2-Q7/H2-D1/H2-Q6/H2-T23/H2-Q4/Gimap5
GO:0046068	cGMP metabolic process	12	-0.815474	-1.65713	0.0102441	0.0102441	0.0572619	834	tags=58%, list=5%, signal=56%	Pde5a/Npr2/Npr1/Pde2a/Gucy1b1/Gucy1a1/Nppc
GO:0009611	response to wounding	446	-0.40167	-1.30185	0.0102523	0.0102523	0.0572619	2365	tags=22%, list=13%, signal=19%	Matn2/Mertk/Prr33/Tspan8/Arhgap24/Vangl2/C1qtnf1/Rreb1/Gnas/Ddr2/Enpp4/Axl/Tspan9/Serping1/Npr2/Fbln1/Lyn/Ptn/Ubash3b/Ppl/Grn/Smad3/Mmp2/P2ry12/Pear1/Plcg2/Zfp36l1/Il33/Emilin2/Smoc2/Zfp36/Gm10791/Snai2/Alox12/Sh2b3/Tlr4/Cd151/Map3k1/Notch2/Wnt5a/Nfib/Rtn4rl1/Vtn/Cav1/Tlr3/Ptpn6/Ndnf/Trem2/Fermt3/Syk/Rgma/Mrln/Nfia/Entpd2/Ednra/Thbd/Tyrobp/Lcp1/Cd9/Fcer1g/Klk8/Il10/Tec/Pdgfra/Fignl2/Plek/Plpp3/Se…
GO:0120193	tight junction organization	67	-0.567933	-1.58595	0.0103604	0.0103604	0.0577991	1378	tags=18%, list=8%, signal=17%	Cldn34c1/Epha2/Snai2/Ramp2/Prkch/Cldn1/Cldn2/Pecam1/F11r/Cdh5/Cldn5/Esam
GO:0045601	regulation of endothelial cell differentiation	38	-0.620602	-1.58474	0.0104335	0.0104335	0.0581396	2062	tags=34%, list=12%, signal=30%	Foxj2/Zeb1/Notch1/Bmp4/Plcb1/Tmem100/Il1b/Apold1/Xdh/F11r/Ceacam1/Cdh5/Cldn5
GO:1903524	positive regulation of blood circulation	38	0.564968	1.73959	0.0104608	0.0104608	0.0582247	1045	tags=18%, list=6%, signal=17%	Adm2/Ptger3/Rgs4/Ccn2/Tpm1/Ada/Avpr1a
GO:2000106	regulation of leukocyte apoptotic process	98	-0.52233	-1.51136	0.0104781	0.0104781	0.0582537	2691	tags=36%, list=15%, signal=30%	Bcl2l1/Mef2c/Pik3cd/Prkcq/Ccr7/Slc46a2/Mertk/Zc3h8/Axl/Bcl3/Lyn/Efna1/Il7r/Cxcl12/Bmp4/Itpkb/Stat5a/Tsc22d3/Wnt5a/P2rx7/St6gal1/Bcl2l11/Fcer1g/Il10/Dock8/Cd274/Cd24a/Nfkbid/Cd74/Hcls1/Fcgr2b/Ccr5/Nod2/Kitl/Gimap8
GO:0006754	ATP biosynthetic process	72	0.454921	1.54585	0.0105214	0.0105214	0.0584275	4240	tags=57%, list=24%, signal=44%	Eno1/Eno1b/Aldoa/Ndufab1/Atpsckmt/Nudt2/Vcp/Ndufb8/Ndufa8/Ndufb10/Ndufb6/Map2k1/Ndufs7/Sdhb/Ndufs3/Ndufs8/Ndufa11/Ndufs5/Ndufs4/Parp1/Ndufb9/Ndufb7/Ndufv1/Sdhd/Ndufb11/Ndufs6/Ndufb2/Stoml2/Ndufa13/Dnajc30/Myc/Ndufa9/Ndufv3/Ndufv2/Ndufs2/Ndufa12/Ndufa5/Ndufa10/Ndufb4/Ndufc2/Ndufc1
GO:0051338	regulation of transferase activity	626	-0.38883	-1.26299	0.0106003	0.0106003	0.058794	2433	tags=20%, list=14%, signal=18%	Adarb1/Eif4a2/Rasgrp1/Inpp5k/Mertk/Spred1/Fgr/Hmbox1/Kat2b/Vangl2/Agap2/Fbxo7/Prkn/Ddr2/Insr/Ephb4/Map2k6/Axl/Arrb2/Ccng2/Pxn/Egf/Prlr/Lyn/Efna1/Met/Pot1a/Vegfc/Nr2f2/Cd86/Trib2/Ubash3b/Adra1a/Synpo2/Mmd/Pkn1/Ttn/Agtr1a/Atp2b4/Sash1/Map3k5/Wnk4/Il34/Pml/Gprc5b/Zfp36/Sh3bp5/Epha2/Cd200/Tfap4/Pot1b/Tlr4/Igtp/Map3k1/Notch2/Wnt5a/Dbndd2/Tek/Cav1/Arrdc3/Map3k11/P2rx7/Ror1/Ptpn6/Dtx3l/Gadd45a/Trem2/Soc…
GO:0051985	negative regulation of chromosome segregation	49	0.506293	1.63435	0.0106138	0.0106138	0.058794	4818	tags=53%, list=27%, signal=39%	Anapc15/Spc24/Bub1/Cdk5rap2/Birc5/Tpr/Trip13/Zwilch/Spdl1/Sirt1/Zwint/Spc25/Chtf18/Plk1/Incenp/Aurkb/Cdca8/Pcid2/Klhl22/Mad2l1bp/Dync1li1/Ik/Zw10/Kntc1/Haspin/Bub3
GO:0006901	vesicle coating	32	0.564856	1.68403	0.0106239	0.0106239	0.058794	3688	tags=50%, list=21%, signal=40%	Trappc6a/Tmed9/Trappc5/Sar1a/Trappc4/Preb/Trappc3/Gbf1/Sar1b/Trappc6b/Trappc1/Arfgap3/Arfgap2/Trappc13/Ap3s2/Sec16a
GO:0002486	antigen processing and presentation of endogenous peptide antigen via MHC class I via ER pathway, TAP-independent	17	-0.747246	-1.64071	0.010642	0.010642	0.0588272	2396	tags=47%, list=13%, signal=41%	H2-Q7/H2-D1/Hfe/H2-Q6/H2-T23/H2-T24/H2-Q4/Mill2
GO:0032715	negative regulation of interleukin-6 production	46	-0.605164	-1.60017	0.0106579	0.0106579	0.0588475	1371	tags=26%, list=8%, signal=24%	Cd200/Tlr4/Prg4/Ptpn6/Arrb1/Trim30a/Il10/Nckap1l/Cd24a/Inpp5d/Lilrb4a/Cd84
GO:0001913	T cell mediated cytotoxicity	48	-0.620758	-1.65541	0.0107285	0.0107285	0.0591059	2692	tags=38%, list=15%, signal=32%	Tap2/Mr1/Rab27a/H2-Q7/H2-D1/Hfe/B2m/Il7r/P2rx7/H2-Q6/H2-T23/Il23a/H2-T24/Nckap1l/H2-Q4/Mill2/Ptprc/Klrd1
GO:0010965	regulation of mitotic sister chromatid separation	55	0.484462	1.57228	0.0107291	0.0107291	0.0591059	4916	tags=51%, list=28%, signal=37%	Anapc15/Spc24/Bub1/Cdc16/Cdk5rap2/Birc5/Tpr/Trip13/Zwilch/Spdl1/Ube2c/Zwint/Spc25/Plk1/Incenp/Aurkb/Cdca8/Pcid2/Klhl22/Mad2l1bp/Dync1li1/Ik/Zw10/Kntc1/Haspin/Bub3/Anapc11/Anapc7
GO:0051303	establishment of chromosome localization	101	0.415901	1.48986	0.0107667	0.0107667	0.0591721	4818	tags=42%, list=27%, signal=31%	Spc24/Pinx1/Nsl1/Rrs1/Kpnb1/Cdca5/Fam83d/Spag5/Birc5/Hnrnpu/Nudc/Spdl1/Rcc2/Mapre1/Sirt1/Chmp6/Zwint/Spc25/Pmf1/Nup62/Rab11a/Snhg15/Incenp/Chmp2a/Aurkb/Vps4a/Cdca8/Seh1l/Cdc42/Ttl/Ndel1/Mlh1/Chmp1a/Dctn2/Chmp7/Eml4/Dync1h1/Cenpq/Zw10/Abraxas2/Racgap1/Bub3
GO:0035740	CD8-positive, alpha-beta T cell proliferation	18	-0.751737	-1.67639	0.0107736	0.0107736	0.0591721	2396	tags=50%, list=13%, signal=43%	H2-Q7/Sh3rf1/H2-D1/Vsir/Irf1/H2-Q6/H2-T23/H2-Q4/Lilrb4a
GO:1904994	regulation of leukocyte adhesion to vascular endothelial cell	29	-0.683717	-1.65978	0.0107778	0.0107778	0.0591721	668	tags=24%, list=4%, signal=23%	Cxcl12/Sele/Itgb2/Selp/Itga4/Ccr2/Ptafr
GO:0070202	regulation of establishment of protein localization to chromosome	12	0.768747	1.77478	0.0108394	0.0108394	0.0594425	2822	tags=75%, list=16%, signal=63%	Cct3/Cct7/Cct6a/Tcp1/Cct2/Dkc1/Cct8/Cct5/Cct4
GO:0045822	negative regulation of heart contraction	23	-0.69281	-1.6132	0.0109078	0.0109078	0.0597499	164	tags=39%, list=1%, signal=39%	Trpv1/Tnf/Tac1/Zc3h12a/Pde5a/Adra1a/Atp1a2/Pln/Agtr2
GO:0010569	regulation of double-strand break repair via homologous recombination	71	0.44463	1.51163	0.0110264	0.0110264	0.0603315	5435	tags=49%, list=30%, signal=34%	Ooep/Ruvbl2/Kmt5a/Rad51/Ubqln4/Rmi2/Polq/Parp1/Ruvbl1/Usp51/Hdgfl2/Ppp4r2/Actb/Tex15/Yeats4/Rpa2/Fignl1/Zfp365/Chek1/Morf4l2/Kdm1a/Senp3/Dmap1/Fancb/Smchd1/Blm/Helb/Ep400/Morf4l1/Spidr/Actl6a/Parpbp/Ercc6/Mad2l2/Wrap53
GO:0006637	acyl-CoA metabolic process	72	0.449865	1.52867	0.0111948	0.0111948	0.0611143	1629	tags=24%, list=9%, signal=22%	Hmgcs1/Mvd/Pdk1/Dgat2/Slc27a3/Mvk/Acot7/Nudt19/Pdk3/Pmvk/Acot4/Acot1/Fasn/Mpc1/Vdac1/Suclg1/Acsl4
GO:0035383	thioester metabolic process	72	0.449865	1.52867	0.0111948	0.0111948	0.0611143	1629	tags=24%, list=9%, signal=22%	Hmgcs1/Mvd/Pdk1/Dgat2/Slc27a3/Mvk/Acot7/Nudt19/Pdk3/Pmvk/Acot4/Acot1/Fasn/Mpc1/Vdac1/Suclg1/Acsl4
GO:0050921	positive regulation of chemotaxis	141	-0.486003	-1.46801	0.0113056	0.0113056	0.0616313	1898	tags=30%, list=11%, signal=27%	Met/Cxcl14/Ptn/Vegfc/Cxcl12/Xcl1/Smad3/P2ry12/Il34/Smoc2/Snai2/C3ar1/Wnt5a/Sema5a/Trem2/Csf1r/Cxcl10/Camk1d/Ednra/Defb25/Spi1/Dapk2/Il23a/Pdgfra/Cx3cr1/Il1b/Nckap1l/Fgf10/Cd74/C5ar1/Rac2/Il16/Cxcr4/Fgf16/Ntf3/S1pr1/Pla2g7/Ccr2/Ripor2/Edn3/Cdh13/Kdr/Pdgfb
GO:0036293	response to decreased oxygen levels	212	0.334805	1.34614	0.0113149	0.0113149	0.0616313	838	tags=17%, list=5%, signal=16%	Mgarp/Egln3/Higd1a/Eno1/Fam162a/Pgk1/Bnip3/Eno1b/Ddah1/Ak4/Kcnma1/Cryab/Pdk1/Egln1/Vegfd/Lif/Vegfa/Plk3/Sod3/Eif4ebp1/Hyou1/Ptgis/Nol3/Vasn/Rgcc/Suv39h2/Pdk3/Ajuba/Hif1a/Tbl2/Twist1/Ada/Ddit4/Comt/Pin1/P4hb
GO:0043122	regulation of canonical NF-kappaB signal transduction	205	-0.456379	-1.4206	0.0113636	0.0113636	0.061827	2173	tags=25%, list=12%, signal=23%	Prkn/Ticam2/Tle1/Card6/Trim5/Arrb2/Traf5/Pink1/Tgm2/Ikbke/Plcg2/Trim6/Trim25/Zc3hav1/Tgfbr3/Trim12c/Gprc5b/Trim30d/Tlr4/Igtp/Wnt5a/Trim12a/Clec4d/Trim21/Traf3ip2/Cav1/Tlr3/Eda/Ror1/Traf1/Trem2/Irgm2/Irgm1/Ednra/Trim30a/Tifa/Clec4n/Cx3cr1/Trim34a/Il1b/Esr1/Card11/Nfkbid/Cd74/Lilrb4a/Nod2/Tnip3/Eda2r/Prkcb/Ednrb/Cd36/Tnfsf10
GO:0050802	circadian sleep/wake cycle, sleep	20	0.638351	1.69883	0.0114108	0.0114108	0.0620137	752	tags=15%, list=4%, signal=14%	Csf2/Ptger3/Ada
GO:0060716	labyrinthine layer blood vessel development	24	0.624008	1.73083	0.0114356	0.0114356	0.0620788	1854	tags=29%, list=10%, signal=26%	Wnt2/Fzd5/Hs6st1/Ccn1/Tmed2/Syde1/Fbxw8
GO:0048199	vesicle targeting, to, from or within Golgi	28	0.584316	1.66242	0.0115583	0.0115583	0.0626748	4101	tags=54%, list=23%, signal=41%	Trappc6a/Tmed9/Trappc5/Sar1a/Trappc4/Preb/Trappc3/Gbf1/Sar1b/Tmed10/Trappc1/Arfgap3/Arfgap2/Sec16a/Wipi1
GO:0000054	ribosomal subunit export from nucleus	17	0.670629	1.70608	0.0116179	0.0116179	0.0628566	4593	tags=65%, list=26%, signal=48%	Ran/Eif6/Mdn1/Abce1/Npm1/Sdad1/Nmd3/Lsg1/Rbm10/Ltv1/1700009N14Rik
GO:0033750	ribosome localization	17	0.670629	1.70608	0.0116179	0.0116179	0.0628566	4593	tags=65%, list=26%, signal=48%	Ran/Eif6/Mdn1/Abce1/Npm1/Sdad1/Nmd3/Lsg1/Rbm10/Ltv1/1700009N14Rik
GO:0002726	positive regulation of T cell cytokine production	30	-0.652795	-1.59386	0.0117319	0.0117319	0.0634026	2574	tags=43%, list=14%, signal=37%	Malt1/H2-Q7/H2-D1/B2m/Xcl1/Dennd1b/Cd55/Nlrp3/H2-Q6/Il1b/H2-Q4/Rsad2/Sash3
GO:0140962	multicellular organismal-level chemical homeostasis	61	-0.58094	-1.59101	0.0117702	0.0117702	0.0634132	2474	tags=33%, list=14%, signal=28%	Slc40a1/Inpp5k/Lipa/Ank1/Hfe/B2m/Mllt6/Abca3/Oas1a/Pthlh/Oas1g/Ctns/Epas1/Oas1c/Slc11a1/Napsa/Aqp1/Adgrf5/Kdr/Aqp7
GO:0035307	positive regulation of protein dephosphorylation	39	-0.632934	-1.62242	0.0117728	0.0117728	0.0634132	689	tags=15%, list=4%, signal=15%	Pirb/Ptprc/Cd300a/Ppp1r16b/Agtr2/Cdh5
GO:0010632	regulation of epithelial cell migration	226	-0.453216	-1.42323	0.0117732	0.0117732	0.0634132	1981	tags=26%, list=11%, signal=24%	Stc1/Egf/Adora2b/Arsb/Efna1/Met/Rin2/Vegfc/Notch1/Nr2f2/Amot/Bmp4/Amotl1/Itga3/Grn/Irs1/Patz1/Atp2b4/Sash1/Pik3r2/Plcg2/Stat5a/Ptprg/Tgfbr3/Smoc2/Gab2/Epha2/Snai2/Alox12/Jup/Wnt5a/Tek/Sema5a/Gadd45a/Dcn/Glul/Sp100/Meox2/Gpld1/Prox1/Plpp3/Mmrn2/Fgf10/Angpt2/Card10/Mmp9/Fgf16/Col18a1/Fgf1/Nos3/Gata2/Flt4/Aqp1/Igf2/Kdr/Pdgfb/Ceacam1/Dll4/Ptprr
GO:0006271	DNA strand elongation involved in DNA replication	13	0.725484	1.71091	0.01182	0.01182	0.0635944	4468	tags=77%, list=25%, signal=58%	Pold2/Pole3/Mcm3/Mcm4/Lig3/Pcna/Pole/Gins1/Mcm7/Lig1
GO:0019935	cyclic-nucleotide-mediated signaling	81	-0.549481	-1.56481	0.0118603	0.0118603	0.0637405	834	tags=20%, list=5%, signal=19%	Npr1/Pde2a/Pde7b/Ahr/Nos2/Pde8b/Gucy1b1/Gucy1a1/Adcyap1r1/Nppc/Ednrb/Aqp1/Cd36/Ramp3/Kcnc2/Aplnr
GO:0002888	positive regulation of myeloid leukocyte mediated immunity	33	-0.653335	-1.62089	0.0118958	0.0118958	0.0638603	2396	tags=42%, list=13%, signal=37%	H2-Q7/H2-D1/Stap1/Ticam2/Fcgr3/Tyrobp/H2-Q6/Fcer1g/H2-T23/Spi1/Itgb2/H2-Q4/Ptafr/Fcgr1
GO:1990573	potassium ion import across plasma membrane	36	-0.640049	-1.62172	0.011956	0.011956	0.0641122	1593	tags=28%, list=9%, signal=25%	Atp1b1/Wnk4/Kcnj2/Slc12a6/Kcnh2/Kcnj13/Atp1b2/Abcc9/Atp1a2/Kcnj8
GO:0009190	cyclic nucleotide biosynthetic process	15	-0.772262	-1.64431	0.0120077	0.0120077	0.0643184	1943	tags=40%, list=11%, signal=36%	Npr2/Adcy4/Npr1/Gucy1b1/Gucy1a1/Nppc
GO:1903307	positive regulation of regulated secretory pathway	45	-0.615383	-1.61487	0.0122315	0.0122315	0.0654444	2966	tags=33%, list=17%, signal=28%	Rab15/Bcl2l1/Rab27a/Fgr/Adora2b/Gab2/Syk/Stxbp2/Kcnb1/Fcer1g/Itgb2/Cacna1h/Nppc/Ptafr/Gata2
GO:0002043	blood vessel endothelial cell proliferation involved in sprouting angiogenesis	20	-0.734122	-1.65489	0.0122574	0.0122574	0.0654761	1772	tags=55%, list=10%, signal=50%	Bmp4/Agtr1a/Epha2/Sema5a/Mmrn2/Gata2/Ngfr/Ppp1r16b/Nrarp/Dll4/Aplnr
GO:0032729	positive regulation of type II interferon production	78	-0.538107	-1.51816	0.0122645	0.0122645	0.0654761	2475	tags=31%, list=14%, signal=27%	Pde4b/H2-Q7/Rasgrp1/H2-D1/Isg15/Tyk2/Ticam2/Bcl3/Klrk1/Tlr4/Wnt5a/Tlr3/Tnfsf9/H2-Q6/Il23a/Il1b/H2-Q4/Cd14/Slc11a1/Irf8/Cd2/Tlr7/Ccr2/Sash3
GO:0043029	T cell homeostasis	50	-0.591364	-1.58537	0.0123699	0.0123699	0.0658677	2542	tags=36%, list=14%, signal=31%	Stat5b/Slc46a2/Zc3h8/Il7r/Chst3/Aim2/Stat5a/Pmaip1/Lmo1/Tsc22d3/P2rx7/Bcl2l11/Ahr/Coro1a/Spns2/Nckap1l/Cd24a/Gimap5
GO:0032736	positive regulation of interleukin-13 production	24	-0.695704	-1.63195	0.0123761	0.0123761	0.0658677	3220	tags=50%, list=18%, signal=41%	Irf4/Rara/Il17ra/H2-Q7/H2-D1/Il33/Tlr4/Nlrp3/Tslp/H2-Q6/H2-T23/H2-Q4
GO:0030003	intracellular monoatomic cation homeostasis	440	-0.395232	-1.28018	0.0123787	0.0123787	0.0658677	2151	tags=17%, list=12%, signal=15%	Cyb561/Cp/Hexb/Hfe/Atp6v0d2/Gm6377/Stc1/B2m/Tgm2/Lyn/Ubash3b/Cln6/Mcoln1/Xcl1/Grn/Ppt1/Atp2b4/Atp1b1/Plcg2/Pml/Ank2/Itpr3/Plcb1/Dmd/Grina/Cln3/Efhc1/Car7/Steap4/Rab20/Wnt5a/Dmpk/Tmem64/Cav1/P2rx7/Ptpn6/Steap3/Cxcl9/Cxcl10/Ednra/Slc24a5/Ccl8/Nr3c2/Slc8b1/Scara5/Slc25a27/Npy1r/Coro1a/Atp2a1/Tmc8/Cav2/Inpp4b/Slc11a1/Atp1b2/Ptprc/Ccr5/Grin2b/Nppc/Hvcn1/Ccr2/Prkcb/Chd7/Clec4b1/Atp2a3/Casq2/Atp1a2/Trpc…
GO:0140052	cellular response to oxidised low-density lipoprotein particle stimulus	11	-0.816609	-1.63908	0.0124469	0.0124469	0.0661577	1289	tags=36%, list=7%, signal=34%	Tlr4/Trem2/Cd68/Cd36
GO:0002377	immunoglobulin production	130	-0.493405	-1.47702	0.0124673	0.0124673	0.0661936	1996	tags=24%, list=11%, signal=21%	H2-Q7/Shld1/H2-D1/Polm/Il7r/Cd86/Xcl1/Pkn1/Tnfsf13/Il33/Mzb1/Itm2a/Traf3ip2/Icosl/Cd37/H2-Ab1/H2-Q6/H2-T23/Il10/Batf/Fgl2/H2-Q4/Card11/Lilrb4a/Cd22/Ptprc/Fcgr2b/Nod2/Sash3/Cd28/Ighm
GO:0006270	DNA replication initiation	30	0.564787	1.63988	0.012487	0.012487	0.0662008	4877	tags=57%, list=27%, signal=41%	Mcm5/Ccne1/Orc2/Ccne2/Mcm3/Mcm10/Mcm6/Ticrr/Topbp1/Mcm4/Orc6/Orc1/Mcm2/Mcm7/Prim1/Cdc45/Prim2
GO:0001776	leukocyte homeostasis	128	-0.498559	-1.4913	0.012496	0.012496	0.0662008	2542	tags=35%, list=14%, signal=30%	Stat5b/Wdr37/Pik3cd/Pde4b/Slc40a1/Slc46a2/Dock11/Mertk/Lipa/Zc3h8/Axl/Tspan9/Lyn/Il7r/Chst3/Itpkb/Dock10/Pkn1/Aim2/Stat5a/Pmaip1/Lmo1/Tsc22d3/Sh2b3/Traf3ip2/P2rx7/Csf1r/Bcl2l11/Gpr183/Fcer1g/Pirb/Tnfrsf13b/Ahr/Coro1a/Spns2/Nckap1l/Cd24a/Cfh/Cd74/Lilrb4a/Fcgr2b/Ccr2/Kitl/Sash3/Gimap5
GO:0002428	antigen processing and presentation of peptide antigen via MHC class Ib	19	-0.740674	-1.66723	0.0125441	0.0125441	0.0663467	2692	tags=53%, list=15%, signal=45%	Tap2/H2-Q7/H2-D1/Hfe/B2m/H2-Q6/H2-T23/H2-T24/H2-Q4/Mill2
GO:0010954	positive regulation of protein processing	23	0.619559	1.70809	0.0125598	0.0125598	0.0663467	906	tags=30%, list=5%, signal=29%	Eno1/Eno1b/Bag2/Myh9/Timm17a/Spon1/Timm23
GO:0001755	neural crest cell migration	53	-0.57258	-1.54504	0.0125647	0.0125647	0.0663467	1384	tags=25%, list=8%, signal=23%	Sema3f/Sema6a/Sema5a/Sema6b/Ednra/Sema6d/Sema4d/Sema3g/Kitl/Ednrb/Bmp7/Lama5/Edn3
GO:0046165	alcohol biosynthetic process	113	0.386288	1.41229	0.0126204	0.0126204	0.0665679	1335	tags=25%, list=7%, signal=23%	Fdps/Dhcr24/Idi1/Cyp51/Msmo1/Hmgcs1/Mvd/Pgp/Fdft1/Insig1/Mvk/Myh9/Bmp6/Hmgcr/Hsd17b7/Nfkb1/Ebp/Apoa1/Lss/Pmvk/Park7/Wnt4/Srebf2/Dhfr/Nus1/Spr/Got1/Dhcr7
GO:0043266	regulation of potassium ion transport	78	-0.536536	-1.51373	0.012639	0.012639	0.0665933	1707	tags=27%, list=10%, signal=24%	Hbp1/Akap7/Atp1b1/Wnk4/Ank2/Kcnj2/Fhl1/Cav1/Kcnh2/Trem2/Klhl24/Agrn/Nr3c2/Atp1b2/Nos3/Abcc9/Casq2/Edn3/Kcnc2/Lrrc55/Kcna5
GO:0071624	positive regulation of granulocyte chemotaxis	29	-0.673802	-1.63571	0.0126986	0.0126986	0.0668345	1203	tags=48%, list=7%, signal=45%	Mcu/Ccr7/Xcl1/C3ar1/Camk1d/Ednra/Dapk2/Il23a/Il1b/Nckap1l/Cd74/C5ar1/Rac2/Ripor2
GO:0050829	defense response to Gram-negative bacterium	56	-0.591874	-1.60989	0.0127429	0.0127429	0.0669952	3458	tags=43%, list=19%, signal=35%	Gsdmd/Lbp/App/Lyz1/Naip5/Tac1/Casp1/Mr1/Peli3/Chga/B2m/Tlr4/Igtp/Lyz2/Trem2/Irgm2/Irgm1/Tslp/Il23a/Mpeg1/Slc11a1/Iigp1/Ighm/Aqp1
GO:0033045	regulation of sister chromatid segregation	98	0.403532	1.44078	0.0127884	0.0127884	0.0671252	4932	tags=47%, list=28%, signal=34%	Anapc15/Nek6/Spc24/Bub1/Phf10/Smarca4/Cdc16/Cdk5rap2/Anapc4/Birc5/Hnrnpu/Bcl7c/Tpr/Trip13/Zwilch/Smarcb1/Spdl1/Smarcc1/Cdk1/Rmi2/Ube2c/Sirt1/Zwint/Spc25/Actb/Plk1/Incenp/Aurkb/Cdca8/Anapc2/Pcid2/Tacc3/Klhl22/Mad2l1bp/Dync1li1/Ik/Smarce1/Zw10/Kntc1/Haspin/Bub3/Bcl7a/Anapc11/Smarcd3/Anapc7/Bcl7b
GO:0006360	transcription by RNA polymerase I	60	0.463924	1.55215	0.0127954	0.0127954	0.0671252	3373	tags=42%, list=19%, signal=34%	Polr1e/Wdr75/Prr7/Mybbp1a/Lyar/Flna/Ddx21/Ncl/Spty2d1/Polr2e/Smarca4/Atf4/Heatr1/Pwp1/Smarca5/Wdr43/Myo1c/Smarcb1/Zmpste24/Polr1d/Ppp1r15a/Tcof1/Gtf2h5/Pih1d1/Carm1
GO:0002483	antigen processing and presentation of endogenous peptide antigen	22	-0.706206	-1.61395	0.0129751	0.0129751	0.0679204	2692	tags=55%, list=15%, signal=46%	Tapbp/Tap2/H2-Q7/H2-D1/Hfe/B2m/Tap1/H2-Q6/H2-T23/H2-T24/H2-Q4/Mill2
GO:0019885	antigen processing and presentation of endogenous peptide antigen via MHC class I	22	-0.706206	-1.61395	0.0129751	0.0129751	0.0679204	2692	tags=55%, list=15%, signal=46%	Tapbp/Tap2/H2-Q7/H2-D1/Hfe/B2m/Tap1/H2-Q6/H2-T23/H2-T24/H2-Q4/Mill2
GO:0006120	mitochondrial electron transport, NADH to ubiquinone	23	0.617705	1.70297	0.0130206	0.0130206	0.0680852	4180	tags=74%, list=23%, signal=57%	Dnajc15/Park7/Ndufb8/Ndufa8/Ndufb6/Ndufs7/Ndufs3/Ndufs8/Coq9/Ndufb9/Ndufv1/Ndufs6/Bdnf/Ndufv2/Ndufs2/Ndufa10/Ndufc2
GO:0032647	regulation of interferon-alpha production	29	-0.671968	-1.63126	0.0131254	0.0131254	0.0685588	1590	tags=28%, list=9%, signal=25%	Nmi/Zc3hav1/Tlr4/Ifih1/Tlr3/Irf7/Tlr7/Gbp4
GO:2000563	positive regulation of CD4-positive, alpha-beta T cell proliferation	11	-0.815514	-1.63689	0.0134327	0.0134327	0.0700228	2506	tags=64%, list=14%, signal=55%	Prkcq/Xcl1/Cd55/Irgm1/Cd24a/Card11/Cd28
GO:0086091	regulation of heart rate by cardiac conduction	28	-0.662094	-1.60219	0.0134346	0.0134346	0.0700228	1712	tags=29%, list=10%, signal=26%	Scn2b/Ank2/Kcnj2/Jup/Cav1/Kcnh2/Ace/Kcna5
GO:1901184	regulation of ERBB signaling pathway	66	-0.561032	-1.56521	0.0135404	0.0135404	0.0704984	955	tags=14%, list=5%, signal=13%	Spry2/Esr1/Rhbdf2/Mmp9/Cadm1/Sh3tc2/Cdh13/Afap1l2/Ceacam1
GO:0070482	response to oxygen levels	231	0.317587	1.29454	0.0136152	0.0136152	0.0708112	838	tags=16%, list=5%, signal=15%	Mgarp/Egln3/Higd1a/Eno1/Fam162a/Pgk1/Bnip3/Eno1b/Ddah1/Ak4/Kcnma1/Cryab/Pdk1/Egln1/Vegfd/Lif/Vegfa/Plk3/Gucy1b2/Sod3/Eif4ebp1/Hyou1/Ptgis/Nol3/Vasn/Rgcc/Suv39h2/Pdk3/Ajuba/Hif1a/Tbl2/Twist1/Ada/Ddit4/Comt/Pin1/P4hb
GO:2000345	regulation of hepatocyte proliferation	22	-0.705662	-1.61271	0.013652	0.013652	0.0709266	423	tags=23%, list=2%, signal=22%	Ptn/Lims2/Fgf1/Gli1/Ceacam1
GO:0035306	positive regulation of dephosphorylation	51	-0.606754	-1.62718	0.0137335	0.0137335	0.0712735	689	tags=16%, list=4%, signal=15%	Pirb/Plek/Chp2/Ptprc/Cd300a/Ppp1r16b/Agtr2/Cdh5
GO:0060048	cardiac muscle contraction	112	-0.508602	-1.49745	0.0137703	0.0137703	0.0713877	3185	tags=37%, list=18%, signal=30%	Camk2d/Atp1a3/Myl1/Cacna1d/Rgs2/Zc3h12a/Vegfb/Hdac4/Pde5a/Fxyd1/Gja5/Pde4b/Chga/Map2k6/Stc1/Gaa/Met/Gsn/Adra1a/Uty/Scn2b/Ttn/Atp1b1/Ank2/Dmd/Zfas1/Kcnj2/Jup/Tnni2/Cav1/Actc1/Kcnh2/Agrn/Cacna1h/Cxcr4/Abcc9/Casq2/Atp1a2/Kcnj8/Pln/Kcna5
GO:0032728	positive regulation of interferon-beta production	43	-0.609028	-1.5783	0.0138147	0.0138147	0.0715411	2166	tags=35%, list=12%, signal=31%	Isg15/Tlr2/Zbtb20/Zc3hav1/Irf1/Tlr4/Ifih1/Tlr3/Irf7/Oas1a/Oas1g/Oas1c/Oas2/Tlr7/Oas3
GO:1903523	negative regulation of blood circulation	25	-0.675882	-1.59555	0.0139094	0.0139094	0.0719545	164	tags=40%, list=1%, signal=40%	Trpv1/Tnf/App/Tac1/Zc3h12a/Pde5a/Adra1a/Atp1a2/Pln/Agtr2
GO:1900225	regulation of NLRP3 inflammasome complex assembly	35	-0.648158	-1.62505	0.0139393	0.0139393	0.0720322	1580	tags=31%, list=9%, signal=29%	Plcg2/Tlr4/Igtp/Casp4/Fbxl2/Trem2/Irgm2/Irgm1/Trim30a/Gbp5/Cd36
GO:1904816	positive regulation of protein localization to chromosome, telomeric region	13	0.717	1.69091	0.013969	0.013969	0.0721087	1857	tags=69%, list=10%, signal=62%	Cct3/Cct7/Cct6a/Tcp1/Cct2/Gnl3/Dkc1/Cct8/Cct5
GO:0006997	nucleus organization	126	0.368212	1.37102	0.0140624	0.0140624	0.0725133	4281	tags=43%, list=24%, signal=33%	Nolc1/Zpr1/Polr1b/Lmnb2/Lmna/Rrp8/Aff2/Gopc/Pes1/Usp36/Golm1/Smarca5/Agfg1/Cdkn2a/Bin1/Gper1/Tmf1/Serbp1/Rtn4/Nup153/Ctdnep1/Emd/Nup35/Nsfl1c/Banf1/Sirt1/Nup107/Chmp6/Zmpste24/Selenof/Sf1/Lemd3/Habp4/Plk1/Neat1/H3f3b/Chmp2a/Vps4a/Rps19/Tor1b/Seh1l/Nup93/Pafah1b1/Chek1/Lemd2/Tmem170/Syne1/Ndel1/Lmnb1/Dyrk3/Ndc1/Chmp1a/Plec/Chmp7
GO:0035924	cellular response to vascular endothelial growth factor stimulus	60	-0.572767	-1.56632	0.0141048	0.0141048	0.0726544	1859	tags=33%, list=10%, signal=30%	Vegfc/Notch1/Ptp4a3/Foxc1/Atp2b4/Smoc2/Adamts12/Dll1/Sema6a/Tcf4/Dcn/Spry2/Ramp2/Pdgfra/Xdh/Flt1/Flt4/Kdr/Pdgfb/Dll4
GO:0051301	cell division	561	0.268658	1.16438	0.0141331	0.0141331	0.0727227	4522	tags=36%, list=25%, signal=28%	Ooep/Pdxp/Vegfd/Ereg/Vegfa/Plk3/Haus7/Myh9/Anapc15/Thbs4/Ran/Nedd9/Smyd5/Ybx1/Nek6/Usp39/Sac3d1/Nsun2/Hells/Cks2/Ccdc124/Spc24/Syce2/Calm1/Pin1/Bub1/Haus8/Dctn3/Brip1/Spout1/Cenpx/Rala/Diaph3/Ube2s/Ccne1/Ctdp1/Nsl1/Sfrp2/Ssna1/Rcc1/Chek2/Cfl1/Kmt5a/Ccnf/Sh3glb1/Gnl3/Ccne2/Myh10/Cdc16/Cdca5/Cdk4/Fam83d/Cib1/Spag5/Rae1/Poldip2/Cinp/Rhoc/Anapc4/Actr3/Tgfb3/Cdc123/Sde2/Birc5/Exoc5/Hnrnpu/Rps3/Tpr/Ins…
GO:0046330	positive regulation of JNK cascade	91	-0.515446	-1.47293	0.0141997	0.0141997	0.0729881	2392	tags=27%, list=13%, signal=24%	Rasgrp1/Sh3rf1/Cracr2a/Dixdc1/Dab2/Taok2/Map3k5/Myoc/Plcb1/Tlr4/Map3k1/Mturn/Wnt5a/Tlr3/Map3k11/Gadd45a/Fgd4/Il1b/Nrk/Naip2/Fcgr2b/Nod2/Rassf2/Eda2r/Flt4
GO:0000466	maturation of 5.8S rRNA from tricistronic rRNA transcript (SSU-rRNA, 5.8S rRNA, LSU-rRNA)	24	0.615052	1.70599	0.0145839	0.0145839	0.0748075	3460	tags=54%, list=19%, signal=44%	Bop1/Ftsj3/Exosc8/Rcl1/Rrs1/Exosc2/Pes1/Npm1/Wdr12/Nol9/Rpp40/Fcf1/Abt1
GO:0006446	regulation of translational initiation	64	0.483011	1.63602	0.014602	0.014602	0.0748075	2935	tags=34%, list=16%, signal=29%	Eif4ebp1/Eif3b/Eif2s1/Dnajc3/Bc1/Eif4e2/Bzw2/Rps6kb1/Ncbp1/Tmed2/Eif1/Larp1/Npm1/Eif4g1/Tpr/Eif5/Eif4g2/Bzw1/Eif5b/Ppp1r15b/Ppp1r15a/Habp4
GO:0003159	morphogenesis of an endothelium	19	-0.733307	-1.65065	0.0146156	0.0146156	0.0748075	1342	tags=42%, list=8%, signal=39%	Adamts12/Alox12/Cxcl10/Itgax/Cxcr4/Fgf1/Kdr/Dll4
GO:0061154	endothelial tube morphogenesis	19	-0.733307	-1.65065	0.0146156	0.0146156	0.0748075	1342	tags=42%, list=8%, signal=39%	Adamts12/Alox12/Cxcl10/Itgax/Cxcr4/Fgf1/Kdr/Dll4
GO:0090331	negative regulation of platelet aggregation	11	-0.813291	-1.63243	0.0146651	0.0146651	0.0749816	2209	tags=55%, list=12%, signal=48%	C1qtnf1/Ubash3b/Alox12/Sh2b3/Cd9/Ceacam1
GO:0040013	negative regulation of locomotion	321	-0.414577	-1.32227	0.0147116	0.0147116	0.0751403	2053	tags=22%, list=12%, signal=20%	Reck/Cygb/Stc1/Arhgdib/Fbln1/Ptn/Notch1/Nr2f2/Cxcl12/Padi2/Tet1/Patz1/Ptprk/Srgap3/Atp2b4/Pik3r2/Limch1/Il33/Emilin2/Ptprg/Tgfbr3/Plcb1/Lrch1/Nbl1/Sema3f/Cd200/Jup/Flcn/Wnt5a/Sema6a/Cav1/Arrdc3/Sema5a/Robo2/Gadd45a/Sema6b/Dcn/Trp53inp1/St6gal1/Scai/Sp100/Meox2/Mitf/Sema6d/Ogt/Mctp1/Gm266/Sema4d/Sema3g/Igfbp5/Cx3cr1/Fignl2/Mmrn2/Cd74/Angpt2/Card10/Ifitm1/Atp1b2/Apod/Cd300a/Egfl7/Ripor2/Ngfr/Adgrg1…
GO:0007507	heart development	570	-0.393721	-1.27672	0.014734	0.014734	0.0751753	2375	tags=20%, list=13%, signal=18%	Osr1/Zmiz1/Spred1/Mdm4/Bicc1/Popdc3/Vangl2/Ift122/Sh3pxd2b/Gli3/Ece1/Mrtfb/C2cd3/Insr/Ephb4/Acacb/Shc1/Arrb2/Aldh1a2/Zbtb14/Meis1/Tmem67/Gaa/Efna1/Met/Atf7/Gja1/Notch1/Tbc1d32/Adra1a/Bmp4/Ccdc40/Bvht/Uty/Sox11/Smad3/Foxc1/Mmp2/Ttn/Dzip1/Agtr1a/Tmem94/Myod1/Zfp36l1/Tgfbr3/Ank2/Gli2/Ly6e/Snai2/Slc22a5/Dll1/Bmp5/Tmem100/Notch2/Jarid2/Gpc3/Ripply3/Wnt5a/Pdlim3/Tek/Ccdc39/Traf3ip2/Ptch1/Robo2/Plxnd1/A…
GO:0002710	negative regulation of T cell mediated immunity	20	-0.726453	-1.6376	0.0147775	0.0147775	0.0753177	2072	tags=45%, list=12%, signal=40%	Hfe/Il7r/Vsir/Ahr/Nckap1l/Lilrb4a/Ptprc/Nod2/Klrd1
GO:0032094	response to food	30	0.556344	1.61537	0.0149115	0.0149115	0.0759208	1223	tags=20%, list=7%, signal=19%	Cck/Nucb2/Comt/Slc25a25/Prkcg/Fbn1
GO:0019400	alditol metabolic process	21	0.632438	1.70477	0.0149527	0.0149527	0.0760113	1294	tags=29%, list=7%, signal=27%	Tpi1/Dgat2/Pgp/Galk1/Mogat2/Got1
GO:0032414	positive regulation of ion transmembrane transporter activity	69	-0.567855	-1.59361	0.0149607	0.0149607	0.0760113	1633	tags=23%, list=9%, signal=21%	Akap7/Atp1b1/Plcg2/Ank2/Plcb1/Dmd/Trem2/Ctss/Ednra/Shank3/Atp1b2/Chp2/Abcb1a/Reln/Tesc/Lrrc55
GO:0002418	immune response to tumor cell	31	-0.652596	-1.59852	0.0150256	0.0150256	0.0762609	2627	tags=39%, list=15%, signal=33%	Mr1/H2-Q7/H2-D1/Gsdme/Klrk1/Xcl1/H2-Q6/Cd274/Ahr/Cd24a/H2-Q4/Ceacam1
GO:0006890	retrograde vesicle-mediated transport, Golgi to endoplasmic reticulum	44	0.528448	1.67346	0.015081	0.015081	0.0764619	4079	tags=61%, list=23%, signal=47%	Copz2/Nbas/Kdelr3/Cope/Copb2/Tmem115/Rer1/Rint1/Pitpnb/Lman2/Gbf1/Arf4/Stx18/Kdelr2/Arf5/Bicd2/Bnip1/Sec22b/Bet1l/Scfd1/Kdelr1/Ergic2/Uvrag/Scyl1/Rab33b/Arcn1/Rab6a
GO:0031589	cell-substrate adhesion	336	-0.418384	-1.33595	0.0151945	0.0151945	0.0769563	2712	tags=27%, list=15%, signal=23%	Marcks/Epha3/Parvg/Disc1/Npnt/Mmp14/Actn3/Lamb1/Sorbs1/Cdk6/Camsap3/Clasp2/Nrp1/Myo1g/Lamc1/Mertk/Ecm2/Itga8/Prex1/Rreb1/Axl/Pxn/Itga2b/Fbln1/Efna1/Ptn/Rin2/Frem1/Notch1/Dab2/Itga1/Col26a1/Taok2/Ntn4/Itga3/Smad3/Ptprk/Triobp/Limch1/Myoc/Col13a1/Tmem8b/Smoc2/Dmd/Adamts12/Arhgap6/Jup/Lamb3/Nid1/Col5a3/Tek/Vtn/Eda/Cd34/Ndnf/Fermt3/Spock2/St6gal1/Bcl2l11/Gpm6b/Sned1/Gcnt2/Itgb7/Itga10/Thsd1/Nid2/Itgb…
GO:0060402	calcium ion transport into cytosol	24	-0.687073	-1.6117	0.0152236	0.0152236	0.0769691	1778	tags=33%, list=10%, signal=30%	Adra1a/Bmp4/Pml/Cav1/P2rx7/Adcyap1r1/Trpc3/Gimap5
GO:0002638	negative regulation of immunoglobulin production	14	-0.779203	-1.63727	0.0152288	0.0152288	0.0769691	1559	tags=29%, list=9%, signal=26%	Il33/Lilrb4a/Cd22/Fcgr2b
GO:0034111	negative regulation of homotypic cell-cell adhesion	16	-0.755301	-1.63822	0.015317	0.015317	0.077334	2209	tags=44%, list=12%, signal=38%	C1qtnf1/Ubash3b/Alox12/Sh2b3/Cd9/Cd24a/Ceacam1
GO:0001522	pseudouridine synthesis	18	0.667048	1.70838	0.0153682	0.0153682	0.0775113	3254	tags=50%, list=18%, signal=41%	Pusl1/Nhp2/Gar1/Pus7/Dkc1/Tsr3/Nop10/Rpusd3/Pus1
GO:1901379	regulation of potassium ion transmembrane transport	63	-0.556569	-1.5339	0.0154264	0.0154264	0.0777243	1633	tags=29%, list=9%, signal=26%	Akap7/Atp1b1/Wnk4/Ank2/Kcnj2/Fhl1/Cav1/Kcnh2/Trem2/Klhl24/Agrn/Nr3c2/Atp1b2/Abcc9/Casq2/Edn3/Kcnc2/Lrrc55
GO:0050680	negative regulation of epithelial cell proliferation	144	-0.470973	-1.42632	0.0154504	0.0154504	0.077764	2888	tags=31%, list=16%, signal=26%	Ctsl/Klf9/Stat1/B4galt1/Krit1/Mef2c/Wdr13/Cdk6/Atf2/Rap1gap/Ift122/B2m/Zeb1/Ptn/Gja1/Notch1/Dab2/Nr2f2/Rian/Bmp4/Ptprk/Ift80/Tgfbr3/Zfas1/Snai2/Flcn/Gpc3/Wnt5a/Nfib/Cav1/Ptch1/Mtss1/Gas1/Mmrn2/Xdh/Cav2/Lims2/Wfdc1/Cdkn1c/Flt1/Ngfr/Dlk1/Ceacam1/Dll4
GO:0030324	lung development	204	-0.448409	-1.39424	0.0154851	0.0154851	0.0778575	2026	tags=21%, list=11%, signal=19%	Aldh1a2/Sp3/Zfp157/Tmem67/Notch1/Bmp4/Ccdc40/Sox11/Itga3/Thrb/Gli2/Meg3/Tshz3/Gpc3/Wnt5a/Ccdc39/Nfib/Abca3/Rdh10/Spry2/Spry1/Pthlh/Tbx2/Hmga2/Epas1/Fgfr4/Igfbp5/Pdgfra/Acvr2b/Fgf10/Ace/Hopx/Hmga1/Fgf1/Nos3/Gli1/Flt4/Lama5/Hhex/Hhip/Eya1/Kdr/Stra6
GO:0090075	relaxation of muscle	33	-0.646233	-1.60327	0.0155395	0.0155395	0.0780498	2866	tags=48%, list=16%, signal=41%	Rgs2/Pde5a/Actn3/Pde4b/Chga/Adora2b/Gsn/Ttn/Atp1b1/Kcnj2/Atp2a1/Tifab/Gucy1a1/Nppc/P2ry1/Pln
GO:0006614	SRP-dependent cotranslational protein targeting to membrane	17	0.658445	1.67508	0.0157303	0.0157303	0.0788557	5235	tags=76%, list=29%, signal=54%	Srprb/Sec61b/Sec61a1/Srp9/Srp72/Srp19/Sec63/Srp14/Ssr3/Tram1/Srp54a/Srp68/Zfand2b
GO:0072132	mesenchyme morphogenesis	49	-0.594374	-1.58567	0.0157325	0.0157325	0.0788557	2375	tags=31%, list=13%, signal=27%	Osr1/Mdm4/Notch1/Smad3/Foxc1/Snai2/Bmp5/Tmem100/Wnt5a/Robo2/Tbx2/Nos3/Bmp7/Lef1/Aplnr
GO:0030431	sleep	24	0.608844	1.68877	0.0157506	0.0157506	0.0788647	752	tags=12%, list=4%, signal=12%	Csf2/Ptger3/Ada
GO:0006805	xenobiotic metabolic process	57	-0.570875	-1.55453	0.015794	0.015794	0.0790003	959	tags=21%, list=5%, signal=20%	Gstm1/Fmo5/Aox1/Gsta4/Cyp2d22/Cyp2s1/Ahr/Fmo1/Cyp2f2/Cyp2j9/Fmo2/Sult1a1
GO:0097581	lamellipodium organization	88	-0.519104	-1.48116	0.0158506	0.0158506	0.0791507	565	tags=12%, list=3%, signal=12%	Fgd4/Ptpro/Rac2/Ablim1/S1pr1/Parvb/Kit/Aqp1/Cdh13/Abi3/Ablim3
GO:0061077	chaperone-mediated protein folding	59	0.449439	1.49551	0.015861	0.015861	0.0791507	2822	tags=51%, list=16%, signal=43%	Sdf2l1/Hspa5/Hspb1/Fkbp11/Cct3/Hspa9/Pdia4/Bag1/Cct7/Fkbp4/Fkbp2/Cct6a/Tcp1/Cct2/Dnajb2/Unc45a/Dnajb1/Hsph1/Hspa2/Pdcd5/Cct8/Cct5/Hspa13/Hspa8/Pdcl3/Ppid/Dnajb14/Hspe1/Dnajb3/Cct4
GO:0046637	regulation of alpha-beta T cell differentiation	67	-0.554639	-1.54883	0.0158732	0.0158732	0.0791507	1408	tags=33%, list=8%, signal=30%	Rara/Zc3h12a/Malt1/Ccr7/Sh3rf1/Gli3/Itpkb/Irf1/Hlx/Nlrp3/Socs1/Syk/Il23a/Nckap1l/Prdm1/Il2rg/Nfkbid/Lilrb4a/Ccr2/Sash3/Cd83/Gimap5
GO:0030595	leukocyte chemotaxis	202	-0.454288	-1.41264	0.0159417	0.0159417	0.0794106	1904	tags=28%, list=11%, signal=25%	Lyn/Cxcl14/Ptn/Vegfc/Itga1/Cxcl12/Padi2/Xcl1/Mmp2/Il34/Fcgr3/Nbl1/C3ar1/Wnt5a/Slamf9/Ccl4/Ccl3/Cxcl9/Syk/Csf1r/Cxcl10/Camk1d/Gpr183/Ednra/Defb25/Ccl8/Fcer1g/Slc8b1/Spi1/Itgb2/Dapk2/Il23a/Cx3cr1/Coro1a/Il1b/Nckap1l/Ptpro/Cd74/C5ar1/Rac2/Il16/Mmp9/Ch25h/Nod2/S1pr1/Ccl6/Pla2g7/Ccr2/Ccl11/Ccl12/Ednrb/Flt1/Ripor2/Kit/Edn3/Pdgfb
GO:0018158	protein oxidation	14	0.729013	1.77013	0.0160191	0.0160191	0.0797139	992	tags=29%, list=6%, signal=27%	Loxl4/Lox/Apoa1/Loxl3
GO:0010996	response to auditory stimulus	22	-0.698223	-1.59571	0.0161342	0.0161342	0.0801925	437	tags=27%, list=2%, signal=27%	Slitrk6/Ptn/Shank3/Tifab/Atp1a2/Stra6
GO:0060338	regulation of type I interferon-mediated signaling pathway	39	-0.62254	-1.59578	0.0161484	0.0161484	0.0801925	2166	tags=36%, list=12%, signal=32%	Isg15/Ikbke/Usp27x/Trim6/Rbm47/Wnt5a/Irf7/Oas1a/Stat2/Oas1g/Oas1c/Nlrc5/Usp29/Oas3
GO:0001894	tissue homeostasis	230	-0.446428	-1.40465	0.0162061	0.0162061	0.0803139	1846	tags=18%, list=10%, signal=17%	Acp5/Notch1/Ubash3b/Ppargc1b/Foxc1/Tpp1/Vps13b/Ptgs1/Slc22a5/Tlr4/Vstm4/Tmem64/Nfib/Tspan12/P2rx7/Flt3l/Cd34/Syk/Csf1r/Ctss/Gcnt2/Tnfrsf11a/Cd38/Ldb2/Coro1a/Inpp5d/Rac2/Atp1b2/Gnasas1/Nod2/Il10ra/S1pr1/Nos3/Ccr2/Sash3/Gata2/Fcgr4/Alpl/Dlk1/Ceacam1/Slc28a2/Cldn5
GO:0060249	anatomical structure homeostasis	230	-0.446428	-1.40465	0.0162061	0.0162061	0.0803139	1846	tags=18%, list=10%, signal=17%	Acp5/Notch1/Ubash3b/Ppargc1b/Foxc1/Tpp1/Vps13b/Ptgs1/Slc22a5/Tlr4/Vstm4/Tmem64/Nfib/Tspan12/P2rx7/Flt3l/Cd34/Syk/Csf1r/Ctss/Gcnt2/Tnfrsf11a/Cd38/Ldb2/Coro1a/Inpp5d/Rac2/Atp1b2/Gnasas1/Nod2/Il10ra/S1pr1/Nos3/Ccr2/Sash3/Gata2/Fcgr4/Alpl/Dlk1/Ceacam1/Slc28a2/Cldn5
GO:0008543	fibroblast growth factor receptor signaling pathway	73	-0.545056	-1.52733	0.0162534	0.0162534	0.0804658	1445	tags=21%, list=8%, signal=19%	Smoc2/Wnt5a/Tcf7l2/Spry2/Spry1/Tbx2/Fgfr4/Spry4/Fgf10/Fgf16/Fgf1/Flrt1/Ngfr/Hhip/Pdgfb
GO:0021904	dorsal/ventral neural tube patterning	20	-0.720452	-1.62408	0.0163812	0.0163812	0.0809391	2449	tags=55%, list=14%, signal=48%	Gpr161/Ift122/Gli3/Tbc1d32/Bmp4/Wdr19/Tctn1/Gli2/Ptch1/Gas1/Pax7
GO:0033047	regulation of mitotic sister chromatid segregation	53	0.471011	1.52949	0.0163825	0.0163825	0.0809391	4818	tags=51%, list=27%, signal=37%	Anapc15/Spc24/Bub1/Cdk5rap2/Birc5/Hnrnpu/Tpr/Trip13/Zwilch/Spdl1/Cdk1/Sirt1/Zwint/Spc25/Plk1/Incenp/Aurkb/Cdca8/Pcid2/Klhl22/Mad2l1bp/Dync1li1/Ik/Zw10/Kntc1/Haspin/Bub3
GO:0002685	regulation of leukocyte migration	217	-0.441814	-1.38093	0.0164341	0.0164341	0.0810994	2007	tags=26%, list=11%, signal=23%	Itga2b/Tlr2/Lyn/Cxcl14/Ptn/Vegfc/Cxcl12/Padi2/Xcl1/P2ry12/Il33/Il34/Plcb1/Lrch1/Nbl1/Cd200/C3ar1/Wnt5a/Trem2/Csf1r/Cxcl10/Camk1d/Ednra/Defb25/Cd9/Slc8b1/Sele/Spi1/Dapk2/Il23a/Dock8/Cx3cr1/Lyve1/Coro1a/Spns2/Il1b/Nckap1l/Selp/Cd74/Jam2/C5ar1/Rac2/Mmp9/Nod2/Apod/Itga4/Pla2g7/Ccr2/Kitl/Plvap/Ccl12/Ptafr/Cd300a/Ripor2/Edn3/Pecam1
GO:0032232	negative regulation of actin filament bundle assembly	37	-0.627737	-1.59476	0.0164484	0.0164484	0.0810994	2508	tags=38%, list=14%, signal=33%	Clasp2/Inpp5k/Prkn/Cgnl1/Met/Myoc/Arhgap6/Map3k1/Kank4/Kank3/Shank3/S1pr1/Ppp1r9a/F11r
GO:0009123	nucleoside monophosphate metabolic process	59	0.448347	1.49187	0.0164892	0.0164892	0.0812174	2611	tags=47%, list=15%, signal=41%	Ak4/Nme1/Cda/Uck2/Guk1/Nme2/Nt5c/Ampd1/Ak1/Ada/Ak2/Dut/Cad/Gart/Dtymk/Tyms/Umps/Gmpr2/Atic/Impdh1/Nudt2/Adsl/Gmps/Nt5m/Impdh2/Aprt/Dnph1/Cmpk1
GO:0001959	regulation of cytokine-mediated signaling pathway	135	-0.476464	-1.43588	0.0166705	0.0166705	0.0818862	2173	tags=30%, list=12%, signal=26%	Prkn/Isg15/Stap1/Ticam2/Axl/Parp9/Ikbke/Padi2/Usp27x/Trim6/Rffl/Sh2b3/Rbm47/Igtp/Wnt5a/Casp4/Cav1/Trem2/Irf7/Ccdc3/Syk/Oas1a/Irgm2/Stat2/Irgm1/Oas1g/Tslp/Parp14/Crebrf/Oas1c/Laptm5/Nlrc5/Cd24a/Cd74/Cxcr4/Naip2/Ptprc/Usp29/Sigirr/Oas3
GO:0045124	regulation of bone resorption	42	-0.606649	-1.5701	0.0166799	0.0166799	0.0818862	2123	tags=48%, list=12%, signal=42%	Nf1/Ptger4/Egfr/Itgb3/Plekhm1/Gpr137b/Pdk4/Ubash3b/Ppargc1b/Tmem64/P2rx7/Syk/Csf1r/Tnfrsf11a/Cd38/Inpp5d/S1pr1/Fcgr4/Dlk1/Ceacam1
GO:0032823	regulation of natural killer cell differentiation	14	-0.777611	-1.63393	0.0166908	0.0166908	0.0818862	2542	tags=64%, list=14%, signal=55%	Stat5b/Rasgrp1/Axl/Stat5a/Irf1/Flt3l/Il15/Prdm1/Pglyrp1
GO:0032409	regulation of transporter activity	191	-0.451903	-1.39764	0.0167053	0.0167053	0.0818862	1805	tags=18%, list=10%, signal=17%	Fxyd3/Scn2b/Akap7/Atp1b1/Plcg2/Dapk1/Ank2/Plcb1/Dmd/Zfas1/Cacng7/Fhl1/Cav1/Trem2/Klhl24/Ctss/Agrn/Mrln/Ednra/Rem1/Nr3c2/Mmp9/Shank3/Atp1b2/Chp2/Prrt1/Abcb1a/Abcc9/Reln/Casq2/Tesc/Kcnj8/Rasgrf2/Pln/Lrrc55
GO:0071887	leukocyte apoptotic process	125	-0.49506	-1.47639	0.0167096	0.0167096	0.0818862	2691	tags=34%, list=15%, signal=29%	Bcl2l1/Mef2c/Pik3cd/Plekho2/Prkcq/Ccr7/Slc46a2/Mertk/Lipa/Gli3/Zc3h8/Axl/Bcl3/Lyn/Efna1/Il7r/Ebf4/Cxcl12/Bmp4/Itpkb/Pkn1/Stat5a/Tsc22d3/Wnt5a/Traf3ip2/P2rx7/St6gal1/Bcl2l11/Fcer1g/Tnfrsf21/Il10/Dock8/Cd274/Cd24a/Nfkbid/Cd74/Hcls1/Fcgr2b/Ccr5/Nod2/Kitl/Gimap8
GO:0003015	heart process	212	-0.439238	-1.37164	0.0167777	0.0167777	0.0820325	3060	tags=29%, list=17%, signal=25%	Myl1/Cacna1d/Tac1/Tmem161b/Akap13/Nox4/Rgs2/Zc3h12a/Vegfb/Hdac4/Tbx5/Pde5a/Fxyd1/Gja5/Pde4b/Cacna1b/Chga/Mdm4/Nos1ap/Fyn/Map2k6/Stc1/Gaa/Met/Gsn/Gja1/Adra1a/Uty/Scn2b/Ttn/Atp2b4/Thrb/Atp1b1/Ank2/Dmd/Zfas1/Kcnj2/Jup/Tnni2/Dmpk/Cav1/Actc1/Kcnh2/Agrn/Ednra/Epas1/Cacna1h/Ace/Cxcr4/Hopx/Nos3/Abcc9/Ednrb/Casq2/Chrm2/Atp1a2/Edn3/Kcnj8/Ramp3/Pln/Agtr2/Kcna5
GO:1901550	regulation of endothelial cell development	18	-0.7365	-1.64242	0.0167903	0.0167903	0.0820325	560	tags=28%, list=3%, signal=27%	Plcb1/Il1b/F11r/Cdh5/Cldn5
GO:1903140	regulation of establishment of endothelial barrier	18	-0.7365	-1.64242	0.0167903	0.0167903	0.0820325	560	tags=28%, list=3%, signal=27%	Plcb1/Il1b/F11r/Cdh5/Cldn5
GO:0006403	RNA localization	159	0.346359	1.31192	0.0168603	0.0168603	0.0822434	3906	tags=42%, list=22%, signal=33%	Ran/Ybx1/Fbl/Arc/Nsun2/Thoc6/Srsf3/Alyref/Tcp1/Nol6/Znhit6/Hnrnpab/Srsf7/Pabpn1/Mrpl18/Xpot/Kpnb1/Cct2/Magoh/Eif4a3/Ncbp1/Sec13/Rae1/Dkc1/Flot1/Magohb/Hnrnpu/Tomm20/Caprin1/Tpr/Eif4e/Thoc3/Eny2/Nup153/Nup43/Nup35/Nup107/Senp2/Srsf1/Fyttd1/Bicd2/Cct4/Nup62/Xpo5/Hnrnpa2b1/Nop58/Ssb/Ncbp2/Yy1/Rbm8a/Hsf1/Pih1d1/Hnrnpa1/Kif5c/Supt6/Fxr2/Seh1l/Chtop/Znhit3/Nup93/Sarnp/Mapt/Pcid2/Ddx39b/Aaas/Nup85
GO:0032743	positive regulation of interleukin-2 production	37	-0.626623	-1.59193	0.0168675	0.0168675	0.0822434	2574	tags=38%, list=14%, signal=32%	Malt1/Stat5b/Prkcq/Pde4b/Plcg2/Stat5a/Defb25/Il1b/Card11/Ptprc/Ccr2/Sash3/Cd83/Cd28
GO:0042745	circadian sleep/wake cycle	28	0.567857	1.61559	0.0169063	0.0169063	0.0823495	1432	tags=14%, list=8%, signal=13%	Csf2/Ptger3/Ada/Nr1d1
GO:0016322	neuron remodeling	17	-0.734004	-1.61164	0.0169477	0.0169477	0.0824684	1758	tags=47%, list=10%, signal=42%	Anks1/Ntn4/Rnd1/C1qa/Ednra/Cspg4/Scarf1/Pdgfb
GO:0071609	chemokine (C-C motif) ligand 5 production	10	-0.829846	-1.62903	0.0170009	0.0170009	0.082585	2093	tags=40%, list=12%, signal=35%	Ticam2/Mcoln2/Defb25/Oas3
GO:0000768	syncytium formation by plasma membrane fusion	60	-0.567812	-1.55277	0.0170229	0.0170229	0.082585	1783	tags=30%, list=10%, signal=27%	Cxcl12/Myod1/Sbno2/Ehd2/Dyrk1b/Flt3l/Trem2/Cxcl9/Cxcl10/Tyrobp/Gdf15/Cd9/Ccl8/Adamts15/Rapgef3/Dock2/Cd53/Ripor2
GO:0140253	cell-cell fusion	60	-0.567812	-1.55277	0.0170229	0.0170229	0.082585	1783	tags=30%, list=10%, signal=27%	Cxcl12/Myod1/Sbno2/Ehd2/Dyrk1b/Flt3l/Trem2/Cxcl9/Cxcl10/Tyrobp/Gdf15/Cd9/Ccl8/Adamts15/Rapgef3/Dock2/Cd53/Ripor2
GO:0008299	isoprenoid biosynthetic process	30	0.551093	1.60012	0.0170937	0.0170937	0.0828451	1155	tags=40%, list=6%, signal=37%	Fdps/Idi1/Hmgcs1/Mvd/Fdft1/Mvk/Hmgcr/Lss/Aldh1a3/Pmvk/Nus1/Rbp1
GO:0055075	potassium ion homeostasis	29	-0.66229	-1.60777	0.0171803	0.0171803	0.0831816	1593	tags=28%, list=9%, signal=25%	Atp1b1/Slc12a6/Kcnh2/Klhl3/Nr3c2/Atp1b2/Atp1a2/Kcna5
GO:0030968	endoplasmic reticulum unfolded protein response	66	0.43498	1.46517	0.0172073	0.0172073	0.0832202	4253	tags=47%, list=24%, signal=36%	Stc2/Hspa5/Pdia6/Serp1/Eif2s1/Dnajc3/Tbl2/Bok/Selenos/Creb3/Xbp1/Derl1/Tmed2/Atf4/Bax/Stub1/Derl2/Atf3/Ddrgk1/Ptpn2/Bak1/Ppp1r15a/Atf6/Erlec1/Cdk5rap3/Herpud1/Serp2/Cops5/Eif2ak4/Ptpn1/Wfs1
GO:0043406	positive regulation of MAP kinase activity	102	-0.510907	-1.48775	0.0172346	0.0172346	0.0832202	1637	tags=24%, list=9%, signal=21%	Sash1/Map3k5/Il34/Tlr4/Map3k1/Wnt5a/Map3k11/P2rx7/Syk/Tnfrsf11a/Pik3r6/Fgd4/Il1b/Cd24a/Ptprc/Fgf1/Ntf3/Fgd2/Kitl/Flt1/Kit/Edn3/Pdgfb/Ceacam1
GO:0046850	regulation of bone remodeling	51	-0.593786	-1.5924	0.0172399	0.0172399	0.0832202	2123	tags=35%, list=12%, signal=31%	Gpr137b/Pdk4/Gja1/Ubash3b/Ppargc1b/Tmem64/P2rx7/Syk/Csf1r/Tnfrsf11a/Cd38/Inpp5d/Inpp4b/S1pr1/Lepr/Fcgr4/Dlk1/Ceacam1
GO:0031643	positive regulation of myelination	22	-0.694701	-1.58766	0.0172624	0.0172624	0.0832458	454	tags=27%, list=3%, signal=27%	Wasf3/Tppp/Itgax/Ncmap/Tenm4/Ngfr
GO:0002320	lymphoid progenitor cell differentiation	23	-0.678599	-1.58011	0.0172963	0.0172963	0.0833262	1845	tags=30%, list=10%, signal=27%	Notch1/Bmp4/Flcn/Spi1/Batf/Hmga1/Kit
GO:0045048	protein insertion into ER membrane	26	0.625401	1.76601	0.0173685	0.0173685	0.0835905	3436	tags=58%, list=19%, signal=47%	Ubl4a/Emc8/Rab5if/Sec61a1/Emc6/Wdr83os/Tmem147/Emc2/Ncln/Emc4/Ccdc47/Emc10/Bag6/Sgta/Emc7
GO:0097553	calcium ion transmembrane import into cytosol	155	-0.47318	-1.44376	0.0173998	0.0173998	0.0836451	1904	tags=21%, list=11%, signal=19%	Lyn/Ubash3b/Adra1a/Bmp4/Mcoln1/Xcl1/Agtr1a/Plcg2/Pml/Ank2/Itpr3/Plcb1/Dmd/Cav1/P2rx7/Ptpn6/Cxcl9/Cxcl10/Ednra/Slc8b1/Coro1a/Ptprc/Ccr5/Grin2b/Adcyap1r1/Chd7/Clec4b1/Casq2/Trpc3/Pln/Aplnr/Gimap5
GO:0090209	negative regulation of triglyceride metabolic process	13	-0.780015	-1.61828	0.0174663	0.0174663	0.0836451	926	tags=38%, list=5%, signal=36%	Apoe/Apobec1/Gpld1/Esr1/Sorl1
GO:1901018	positive regulation of potassium ion transmembrane transporter activity	13	-0.779551	-1.61731	0.0174663	0.0174663	0.0836451	1633	tags=46%, list=9%, signal=42%	Akap7/Atp1b1/Ank2/Trem2/Atp1b2/Lrrc55
GO:0010459	negative regulation of heart rate	13	-0.779294	-1.61678	0.0174663	0.0174663	0.0836451	62	tags=46%, list=0%, signal=46%	Trpv1/Tnf/Tac1/Adra1a/Pln/Agtr2
GO:0071838	cell proliferation in bone marrow	13	-0.779065	-1.61631	0.0174663	0.0174663	0.0836451	2972	tags=62%, list=17%, signal=51%	Setd4/Mef2c/Lipa/Shc1/Flt3l/Hmga2/Ace/Lef1
GO:0044784	metaphase/anaphase transition of cell cycle	90	0.406127	1.44146	0.0175092	0.0175092	0.0837677	4932	tags=47%, list=28%, signal=34%	Anapc15/Nek6/Spc24/Bub1/Phf10/Smarca4/Cdc16/Cdk5rap2/Anapc4/Birc5/Bcl7c/Tpr/Trip13/Zwilch/Smarcb1/Spdl1/Smarcc1/Ube2c/Zwint/Spc25/Actb/Plk1/Incenp/Aurkb/Cdca8/Anapc2/Pcid2/Tacc3/Klhl22/Mad2l1bp/Dync1li1/Ik/Smarce1/Zw10/Kntc1/Haspin/Bub3/Bcl7a/Anapc11/Smarcd3/Anapc7/Bcl7b
GO:0048148	behavioral response to cocaine	15	0.66693	1.63892	0.0175779	0.0175779	0.0840134	3051	tags=47%, list=17%, signal=39%	Htr2a/Drd4/Homer1/Parp1/Abat/Nos1/Bdnf
GO:0001508	action potential	121	-0.489249	-1.45436	0.0176571	0.0176571	0.0843087	2066	tags=21%, list=12%, signal=18%	Ptpn3/Npr2/Cntnap1/Adra1a/Scn2b/Ank2/Dmd/Cln3/Kcnj2/Jup/Cav1/P2rx7/Rapgef4/Kcnh2/Kcnb1/Ntrk2/Kcna1/Cacna1h/Grin2b/Abcc9/Atp1a2/Cd36/Kcnj8/Kcnc2/Kcna5
GO:0002476	antigen processing and presentation of endogenous peptide antigen via MHC class Ib	18	-0.735142	-1.63939	0.0177167	0.0177167	0.0844264	2692	tags=50%, list=15%, signal=42%	Tap2/H2-Q7/H2-D1/Hfe/H2-Q6/H2-T23/H2-T24/H2-Q4/Mill2
GO:0002484	antigen processing and presentation of endogenous peptide antigen via MHC class I via ER pathway	18	-0.735142	-1.63939	0.0177167	0.0177167	0.0844264	2692	tags=50%, list=15%, signal=42%	Tap2/H2-Q7/H2-D1/Hfe/H2-Q6/H2-T23/H2-T24/H2-Q4/Mill2
GO:0022410	circadian sleep/wake cycle process	22	0.625262	1.72868	0.0178954	0.0178954	0.0851735	752	tags=14%, list=4%, signal=13%	Csf2/Ptger3/Ada
GO:1902969	mitotic DNA replication	16	0.670081	1.67924	0.0179087	0.0179087	0.0851735	4610	tags=69%, list=26%, signal=51%	Mcm3/Mcm6/Rad51/Mcm4/Zmpste24/Mcm2/Gins1/Tk1/Fgfr1/Lig1/Cdc45
GO:0009062	fatty acid catabolic process	93	0.378628	1.34629	0.0179592	0.0179592	0.0852782	3787	tags=28%, list=21%, signal=22%	Adipoq/Mfsd2a/Aldh1l2/Sesn2/Acot7/Nudt19/Dbi/Tysnd1/Twist1/Cnr1/Acat2/Lpin2/Etfb/Scp2/Hao1/Eci1/Acadvl/Auh/Bdh2/Echdc2/Hsd17b10/Gcdh/Slc27a4/Acot8/Phyh/Echs1
GO:0097205	renal filtration	26	-0.657467	-1.56354	0.017966	0.017966	0.0852782	2605	tags=35%, list=15%, signal=30%	Gja5/Xpnpep3/Gja1/Itga3/Ednra/Ptpro/Aqp1/Adgrf5/Pdgfb
GO:0043123	positive regulation of canonical NF-kappaB signal transduction	139	-0.465018	-1.40379	0.0180417	0.0180417	0.0854921	2173	tags=27%, list=12%, signal=24%	Prkn/Ticam2/Trim5/Traf5/Pink1/Tgm2/Ikbke/Trim6/Trim25/Zc3hav1/Trim12c/Gprc5b/Trim30d/Tlr4/Trim12a/Clec4d/Trim21/Traf3ip2/Cav1/Tlr3/Eda/Ror1/Ednra/Trim30a/Tifa/Clec4n/Cx3cr1/Trim34a/Il1b/Card11/Cd74/Nod2/Eda2r/Prkcb/Ednrb/Cd36/Tnfsf10
GO:0072091	regulation of stem cell proliferation	90	-0.518254	-1.47832	0.0180464	0.0180464	0.0854921	2444	tags=30%, list=14%, signal=26%	Tert/Thpo/Ago3/Gli3/Ncoa3/Osr2/Fbln1/Vegfc/Notch1/Bmp4/Sox11/Zfp36l1/Gli2/Snai2/Hoxa3/Wnt5a/Nfib/Ptch1/Rarb/Irgm1/Hmga2/Fgf10/Ace/Ptprc/Kitl/Sox18/Kdr
GO:1904646	cellular response to amyloid-beta	32	-0.645079	-1.59354	0.0181047	0.0181047	0.0856843	2201	tags=34%, list=12%, signal=30%	App/Lgmn/Atp1a3/Fyn/Gja1/Tlr4/Trem2/Fcgr2b/Itga4/Ngfr/Cd36
GO:0050731	positive regulation of peptidyl-tyrosine phosphorylation	157	-0.472541	-1.44592	0.018229	0.018229	0.0858136	2030	tags=29%, list=11%, signal=26%	Dgkq/Arrb2/Tspan9/Egf/Parp9/Lyn/Efna1/Adra1a/Plcg2/Lrp4/Ghr/Il34/Gprc5b/Gfra1/Tlr4/Vtn/Trem2/Syk/Csf1r/Agrn/Tslp/Cspg4/Parp14/Sema4d/Clec4n/Il23a/Il15/Pdgfra/Plpp3/Cd24a/Fgf10/Cd74/Cav2/Hcls1/Ptprc/Nod2/Ntf3/Osm/Kitl/Reln/Ighm/Kit/Cd36/Abi3/Pecam1/Pdgfb
GO:0086009	membrane repolarization	39	-0.615495	-1.57772	0.0182321	0.0182321	0.0858136	1877	tags=31%, list=11%, signal=28%	Gja1/Akap7/Atp1b1/Ank2/Kcnj2/Cav1/Kcnh2/Kcna1/Atp1b2/Casq2/Kcnj8/Kcna5
GO:0033046	negative regulation of sister chromatid segregation	46	0.497789	1.56533	0.0182384	0.0182384	0.0858136	4818	tags=52%, list=27%, signal=38%	Anapc15/Spc24/Bub1/Cdk5rap2/Birc5/Tpr/Trip13/Zwilch/Spdl1/Zwint/Spc25/Plk1/Incenp/Aurkb/Cdca8/Pcid2/Klhl22/Mad2l1bp/Dync1li1/Ik/Zw10/Kntc1/Haspin/Bub3
GO:0033048	negative regulation of mitotic sister chromatid segregation	46	0.497789	1.56533	0.0182384	0.0182384	0.0858136	4818	tags=52%, list=27%, signal=38%	Anapc15/Spc24/Bub1/Cdk5rap2/Birc5/Tpr/Trip13/Zwilch/Spdl1/Zwint/Spc25/Plk1/Incenp/Aurkb/Cdca8/Pcid2/Klhl22/Mad2l1bp/Dync1li1/Ik/Zw10/Kntc1/Haspin/Bub3
GO:0045841	negative regulation of mitotic metaphase/anaphase transition	46	0.497789	1.56533	0.0182384	0.0182384	0.0858136	4818	tags=52%, list=27%, signal=38%	Anapc15/Spc24/Bub1/Cdk5rap2/Birc5/Tpr/Trip13/Zwilch/Spdl1/Zwint/Spc25/Plk1/Incenp/Aurkb/Cdca8/Pcid2/Klhl22/Mad2l1bp/Dync1li1/Ik/Zw10/Kntc1/Haspin/Bub3
GO:2000816	negative regulation of mitotic sister chromatid separation	46	0.497789	1.56533	0.0182384	0.0182384	0.0858136	4818	tags=52%, list=27%, signal=38%	Anapc15/Spc24/Bub1/Cdk5rap2/Birc5/Tpr/Trip13/Zwilch/Spdl1/Zwint/Spc25/Plk1/Incenp/Aurkb/Cdca8/Pcid2/Klhl22/Mad2l1bp/Dync1li1/Ik/Zw10/Kntc1/Haspin/Bub3
GO:0035024	negative regulation of Rho protein signal transduction	25	-0.668703	-1.5786	0.0182902	0.0182902	0.0859736	1898	tags=32%, list=11%, signal=29%	Met/Adra1a/Itga3/Myoc/Flcn/Scai/Ripor2/Rasip1
GO:2001243	negative regulation of intrinsic apoptotic signaling pathway	103	0.382347	1.37342	0.0183083	0.0183083	0.0859753	2698	tags=28%, list=15%, signal=24%	Eno1/Mif/Eno1b/Hspb1/Ptgs2/Hyou1/Nol3/Ivns1abp/Noc2l/Hells/Hif1a/Snai1/Selenos/Creb3/Park7/Ppia/Xbp1/Sh3glb1/Atf4/Pycr1/Parl/Cd44/Ackr3/Map2k1/Ndufs3/Fzd1/Vdac2/Sirt1/Usp47
GO:1905144	response to acetylcholine	40	-0.593169	-1.52287	0.0184433	0.0184433	0.0865251	2977	tags=35%, list=17%, signal=29%	Chrnb1/Anxa7/Sorbs1/Sorbs2/Orai1/Atp2b4/Ly6a/Plcb1/Ly6e/Ly6c1/Ednra/Ly6h/Prkcb/Chrm2
GO:0006941	striated muscle contraction	154	-0.474194	-1.44453	0.0184965	0.0184965	0.0866903	3185	tags=32%, list=18%, signal=26%	Camk2d/Atp1a3/Myl1/Cacna1d/Chrnb1/Rgs2/Zc3h12a/Vegfb/Hdac4/Tnnt3/Pde5a/Fxyd1/Actn3/Gja5/Pde4b/Chga/Map2k6/Stc1/Gaa/Met/Gsn/Adra1a/Uty/Scn2b/Ttn/Atp1b1/Ank2/Dmd/Zfas1/Synm/Kcnj2/Jup/Tnni2/Dmpk/Cav1/Actc1/Kcnh2/Agrn/Rem1/Rcsd1/Atp2a1/Cacna1h/Cxcr4/Abcc9/Casq2/Atp1a2/Kcnj8/Pln/Kcna5
GO:0007585	respiratory gaseous exchange by respiratory system	62	-0.562157	-1.54312	0.0185311	0.0185311	0.0867652	1233	tags=13%, list=7%, signal=12%	Tshz3/Ednra/Hmga1/Jag2/Atp1a2/Flt4/Dach1/Tcf15
GO:0044092	negative regulation of molecular function	742	-0.373327	-1.21423	0.0185483	0.0185483	0.0867652	2072	tags=16%, list=12%, signal=15%	Hfe/Reck/Acacb/Gmip/Arrb2/Bcl3/B2m/Serping1/Sh3bp4/Parp9/Rps6ka1/Lyn/Met/Ifi204/Pot1a/Notch1/Dab2/Nr2f2/Amot/Trib2/Ubash3b/Grn/Pkn1/Atp2b4/Myod1/Aim2/Rffl/Wnk4/Pml/Etfbkmt/Lrch1/Zfp36/Sh3bp5/Cd200/Zfas1/Tfap4/Cln3/Pot1b/Cys1/Col7a1/Mturn/Gpc3/Pla2r1/Dbndd2/Trim21/Nfib/Vtn/Cav1/Ptch1/Mndal/Nlrp3/Tcf7l2/Pi15/Ptpn6/Dtx3l/Gadd45a/Serpini1/Serpinb8/Arrb1/Spry2/Spry1/Ifit2/Rgma/Agrn/Pthlh/Mrln/Sp100/Re…
GO:0010524	positive regulation of calcium ion transport into cytosol	14	-0.773659	-1.62562	0.01864	0.01864	0.08711	1772	tags=43%, list=10%, signal=39%	Bmp4/Cav1/P2rx7/Adcyap1r1/Trpc3/Gimap5
GO:0050764	regulation of phagocytosis	102	-0.50861	-1.48106	0.0186801	0.0186801	0.087213	2505	tags=33%, list=14%, signal=29%	Cfp/Ccr7/Rab27a/Rap1gap/Mertk/Fgr/Stap1/Tlr2/Tgm2/Plcg2/Fcgr3/Pot1b/Scarb1/Trem2/C2/Syk/Appl2/Colec11/Camk1d/Fcer1g/Il15/Nckap1l/Il2rg/Il2rb/Slc11a1/Dock2/Ptprc/Fcgr2b/Nod2/Hck/Fcgr1/Cd300a/Gata2/Cd36
GO:0061351	neural precursor cell proliferation	185	-0.454861	-1.40369	0.0187106	0.0187106	0.0872712	1978	tags=20%, list=11%, signal=18%	Egf/Foxo3/Lyn/Dixdc1/Ptn/Vegfc/Notch1/Zfp503/Grn/Rere/Dagla/Notch2/Wnt5a/Gjc2/Nfib/Rpgrip1/Rarb/Appl2/Nfia/Hmga2/Prox1/Kcna1/Cx3cr1/Il1b/Cd24a/C5ar1/Shank3/Cxcr4/Lims2/Ccr5/Gata2/Lef1/Ngfr/Hhex/Hhip/Adgrg1/Dll4
GO:0090231	regulation of spindle checkpoint	22	0.620713	1.71611	0.0187737	0.0187737	0.0874811	4440	tags=59%, list=25%, signal=44%	Anapc15/Cdk5rap2/Birc5/Tpr/Zwint/Hsf1/Incenp/Aurkb/Cdca8/Pcid2/Mad2l1bp/Dync1li1/Aurka
GO:0002864	regulation of acute inflammatory response to antigenic stimulus	26	-0.655423	-1.55868	0.018837	0.018837	0.0876558	2486	tags=42%, list=14%, signal=36%	Ccr7/Pla2g2d/H2-Q7/H2-D1/Fcgr3/H2-Q6/Fcer1g/H2-T23/H2-Q4/Fcgr2b/Fcgr1
GO:0035701	hematopoietic stem cell migration	11	-0.799578	-1.6049	0.018855	0.018855	0.0876558	483	tags=45%, list=3%, signal=44%	Jam2/Cxcr4/Ptprc/Ccr2/Kit
GO:0043383	negative T cell selection	12	-0.788481	-1.60227	0.0188837	0.0188837	0.0876558	490	tags=50%, list=3%, signal=49%	Ccr7/Gli3/Cd74/Dock2/Ptprc/Cd28
GO:0045060	negative thymic T cell selection	12	-0.788481	-1.60227	0.0188837	0.0188837	0.0876558	490	tags=50%, list=3%, signal=49%	Ccr7/Gli3/Cd74/Dock2/Ptprc/Cd28
GO:0090022	regulation of neutrophil chemotaxis	36	-0.625399	-1.5846	0.018939	0.018939	0.0878282	1203	tags=36%, list=7%, signal=34%	Xcl1/C3ar1/Camk1d/Ednra/Dapk2/Il23a/Il1b/Nckap1l/Cd74/C5ar1/Rac2/Nod2/Ripor2
GO:0046184	aldehyde biosynthetic process	26	0.623466	1.76055	0.0190226	0.0190226	0.0881314	1122	tags=42%, list=6%, signal=40%	Eno1/Pgk1/Tpi1/Pgam1/Gapdh/Aldoa/Bmp6/Pcx/Mdh2/Wnt4/Tkt
GO:0007435	salivary gland morphogenesis	32	-0.64376	-1.59028	0.0191888	0.0191888	0.0888163	1926	tags=38%, list=11%, signal=34%	Tgm2/Met/Twsg1/Ntn4/Snai2/Nfib/Eda/Plxnd1/Fgf10/Bmp7/Lama5/Pdgfb
GO:0017004	cytochrome complex assembly	31	0.571209	1.67264	0.0193294	0.0193294	0.0893137	5774	tags=61%, list=32%, signal=42%	Cox18/Cox19/Coa3/Uqcc2/Sco2/Slc25a33/Lyrm7/Cox10/Uqcc1/Cox14/Taco1/Ttc19/Smim20/Tmem223/Sco1/Cox16/Coa5/Cox17/Coa6
GO:0009069	serine family amino acid metabolic process	28	0.561424	1.59729	0.0193388	0.0193388	0.0893137	1097	tags=32%, list=6%, signal=30%	Phgdh/Gcsh/Shmt2/Mthfd1/Psph/Txnrd1/Psat1/Gart/Dhfr
GO:0141087	positive regulation of inflammasome-mediated signaling pathway	21	-0.706006	-1.60367	0.0193516	0.0193516	0.0893137	1580	tags=29%, list=9%, signal=26%	Plcg2/Tlr4/Casp4/Gbp2/Gbp5/Cd36
GO:0002507	tolerance induction	33	-0.638717	-1.58462	0.0193975	0.0193975	0.0894361	2486	tags=33%, list=14%, signal=29%	Ccr7/H2-Q7/H2-D1/Lyn/Cd86/C3ar1/H2-Q6/H2-T23/Cd274/H2-Q4/Lilrb4a
GO:0048562	embryonic organ morphogenesis	259	-0.433271	-1.37046	0.0194151	0.0194151	0.0894361	2762	tags=26%, list=15%, signal=22%	Tshz1/Asxl2/Myo6/Mef2c/Mmp14/Sp1/Mafb/Hoxc4/Tead2/Osr1/Slc39a1/Itga8/Lrig1/Vangl2/Ift122/Slitrk6/Gli3/Gnas/Hoxa9/C2cd3/Aldh1a2/Sp3/Osr2/Zeb1/Efna1/Gja1/Notch1/Bmp4/Ccdc40/Wdr19/Sox11/Smad3/Hoxd9/Triobp/Hoxb6/Gli2/Epha2/Dll1/Hoxa3/Notch2/Wnt5a/Ccdc39/Hlx/Ntn1/Tcf7l2/Rdh10/Kcnq4/Gas1/Rarb/Spry2/Mmp16/Tbx2/Hoxb7/Ednra/Pdgfra/Prox1/Fgf10/Tifab/Chd7/Gata2/Bmp7/Gli1/Ripor2/Eya1/Clic5/Aplnr/Stra6
GO:0003012	muscle system process	389	-0.404197	-1.3043	0.0194837	0.0194837	0.0896486	2050	tags=19%, list=11%, signal=17%	Acacb/Map2k6/Shc1/Stc1/Meis1/Gaa/Adora2b/Foxo3/Met/Gsn/Notch1/Adra1a/Bmp4/Uty/Scn2b/Smad3/Ttn/Atp2b4/Myod1/Atp1b1/Myoc/Mybpc1/Ank2/Ptgs1/Dmd/Zfas1/Srl/Synm/Kcnj2/Jup/Tmod2/Tshz3/Ncf1/Jarid2/Tnni2/Dmpk/Cav1/Actc1/Kcnh2/Tmod1/Agrn/Tbx2/Ednra/Rem1/Calcrl/Rcsd1/Cd38/Igfbp5/Myh1/Kcna1/Npy1r/Atp2a1/Cacna1h/Cxcr4/Klf15/Tifab/Gucy1a1/Nppc/Nos3/Ptafr/Abcc9/Ednrb/Flt1/Casq2/Chrm2/Atp1a2/Kit/Trpc3/Edn3/Kcnj…
GO:1902100	negative regulation of metaphase/anaphase transition of cell cycle	47	0.492868	1.56693	0.0195169	0.0195169	0.0896486	4818	tags=51%, list=27%, signal=37%	Anapc15/Spc24/Bub1/Cdk5rap2/Birc5/Tpr/Trip13/Zwilch/Spdl1/Zwint/Spc25/Plk1/Incenp/Aurkb/Cdca8/Pcid2/Klhl22/Mad2l1bp/Dync1li1/Ik/Zw10/Kntc1/Haspin/Bub3
GO:1905819	negative regulation of chromosome separation	47	0.492868	1.56693	0.0195169	0.0195169	0.0896486	4818	tags=51%, list=27%, signal=37%	Anapc15/Spc24/Bub1/Cdk5rap2/Birc5/Tpr/Trip13/Zwilch/Spdl1/Zwint/Spc25/Plk1/Incenp/Aurkb/Cdca8/Pcid2/Klhl22/Mad2l1bp/Dync1li1/Ik/Zw10/Kntc1/Haspin/Bub3
GO:0010594	regulation of endothelial cell migration	162	-0.472235	-1.44741	0.0195451	0.0195451	0.0896932	1981	tags=30%, list=11%, signal=27%	Stc1/Egf/Adora2b/Efna1/Met/Rin2/Vegfc/Notch1/Nr2f2/Amot/Bmp4/Amotl1/Grn/Patz1/Atp2b4/Sash1/Pik3r2/Stat5a/Tgfbr3/Smoc2/Epha2/Snai2/Alox12/Jup/Wnt5a/Tek/Sema5a/Gadd45a/Dcn/Glul/Sp100/Meox2/Gpld1/Prox1/Plpp3/Mmrn2/Angpt2/Card10/Fgf16/Col18a1/Fgf1/Nos3/Gata2/Flt4/Igf2/Kdr/Pdgfb/Ceacam1/Dll4
GO:0042308	negative regulation of protein import into nucleus	16	-0.743386	-1.61238	0.0195914	0.0195914	0.0898206	362	tags=19%, list=2%, signal=18%	Apod/Cd36/Gbp4
GO:0007091	metaphase/anaphase transition of mitotic cell cycle	89	0.4084	1.44796	0.0197147	0.0197147	0.0903	4932	tags=47%, list=28%, signal=34%	Anapc15/Nek6/Spc24/Bub1/Phf10/Smarca4/Cdc16/Cdk5rap2/Anapc4/Birc5/Bcl7c/Tpr/Trip13/Zwilch/Smarcb1/Spdl1/Smarcc1/Ube2c/Zwint/Spc25/Actb/Plk1/Incenp/Aurkb/Cdca8/Anapc2/Pcid2/Tacc3/Klhl22/Mad2l1bp/Dync1li1/Ik/Smarce1/Zw10/Kntc1/Haspin/Bub3/Bcl7a/Anapc11/Smarcd3/Anapc7/Bcl7b
GO:0002323	natural killer cell activation involved in immune response	17	-0.729435	-1.6016	0.0197528	0.0197528	0.0903892	569	tags=24%, list=3%, signal=23%	Rab27a/Coro1a/Pglyrp1/Fcgr4
GO:0006605	protein targeting	271	0.29698	1.20959	0.0198087	0.0198087	0.090559	3538	tags=31%, list=20%, signal=26%	Mgarp/Ccl2/Cemip/Hspa5/Tomm40/Ubl4a/Hspd1/Srprb/Nol3/Hras/Yif1b/Hsp90aa1/Timm10/Timm8a1/Sec61b/Grpel1/Timm17a/Spcs2/Hspa4/Timm13/Timm23/Dnajc15/Timm50/Timm9/Sec61a1/Dnlz/Srp9/Srp72/Timm17b/Samm50/Cib1/Ywhag/Arxes2/Srp19/Actr3/Zdhhc12/Timm22/Pdcd5/Parl/Tomm20/Tomm5/Tomm70a/Spcs1/Cdkn2a/Aifm1/Spcs3/Vps53/Cdk5r1/Bag3/Arpc2/Myo1c/Rpl11/Hspa8/Dmtn/Hpca/Sqstm1/Arxes1/Rhod/Mtch1/Sec63/Vps8/Pmpcb/Mtch2/S…
GO:0010563	negative regulation of phosphorus metabolic process	376	-0.405838	-1.30749	0.0198513	0.0198513	0.0905827	2258	tags=18%, list=13%, signal=16%	Kat2b/Abca2/Fbxo7/Prkn/Ctdspl/Stap1/Insr/Dgkq/Arrb2/Nnt/Atg14/Fbln1/Lyn/Met/Nr2f2/Ubash3b/Pkn1/Spred2/Pid1/Slc27a1/Birc3/Wnk4/Irf1/Dmd/Sh3bp5/Tfap4/Flcn/Dbndd2/Cav1/Ptpn6/Gadd45a/Socs1/Arrb1/Spry2/Spry1/Deptor/Socs3/Ogt/Prkch/Parp14/Sema4d/Samsn1/Plek/Spry4/Plpp3/Camk2n1/Il1b/Nckap1l/Xdh/Ptpro/Lilrb4a/Pkib/Ptprc/Ntf3/Cdkn1c/Rassf2/Cadm1/Cd300a/Entpd1/Fabp4/Hhex/Pecam1/Ppp1r16b/Rasip1/Cbfa2t3/Ptpr…
GO:0045936	negative regulation of phosphate metabolic process	376	-0.405838	-1.30749	0.0198513	0.0198513	0.0905827	2258	tags=18%, list=13%, signal=16%	Kat2b/Abca2/Fbxo7/Prkn/Ctdspl/Stap1/Insr/Dgkq/Arrb2/Nnt/Atg14/Fbln1/Lyn/Met/Nr2f2/Ubash3b/Pkn1/Spred2/Pid1/Slc27a1/Birc3/Wnk4/Irf1/Dmd/Sh3bp5/Tfap4/Flcn/Dbndd2/Cav1/Ptpn6/Gadd45a/Socs1/Arrb1/Spry2/Spry1/Deptor/Socs3/Ogt/Prkch/Parp14/Sema4d/Samsn1/Plek/Spry4/Plpp3/Camk2n1/Il1b/Nckap1l/Xdh/Ptpro/Lilrb4a/Pkib/Ptprc/Ntf3/Cdkn1c/Rassf2/Cadm1/Cd300a/Entpd1/Fabp4/Hhex/Pecam1/Ppp1r16b/Rasip1/Cbfa2t3/Ptpr…
GO:0051497	negative regulation of stress fiber assembly	31	-0.643598	-1.57648	0.0199981	0.0199981	0.0911664	2508	tags=35%, list=14%, signal=31%	Clasp2/Inpp5k/Cgnl1/Met/Myoc/Arhgap6/Kank4/Kank3/S1pr1/Ppp1r9a/F11r
GO:0030100	regulation of endocytosis	293	-0.418254	-1.32814	0.020099	0.020099	0.0915402	2870	tags=29%, list=16%, signal=25%	Myo18a/Itgb3/Tbc1d5/Rab5b/Epha3/Bcl2l1/Bicd1/Sdcbp/Ston2/Pip5k1c/Cfp/Alms1/Ccr7/Rab27a/Rap1gap/Nr1h3/Mertk/Fgr/Snx33/Abca2/Dgkd/Prkn/Ophn1/Stap1/Insr/Hfe/Axl/Dgkq/Arrb2/Synj1/Neu3/Egf/B2m/Tlr2/Tgm2/Arhgap21/Dab2/Clip3/Ppt1/Sh3gl3/Plcg2/Fcgr3/Cln3/Pot1b/Dll1/Cd151/Rspo1/Gpc3/Wnt5a/Scarb1/Vtn/Cav1/Dcx/Trem2/C2/Arrb1/Syk/Appl2/Colec11/Camk1d/Clu/Mctp1/Fcer1g/Napb/Sfrp4/Sele/Il15/Nckap1l/Il2rg/Cd14/I…
GO:0030199	collagen fibril organization	63	0.44715	1.51414	0.0201397	0.0201397	0.0915767	1182	tags=25%, list=7%, signal=24%	Loxl4/Lox/Scx/P4ha1/Col11a1/Comp/Serpinh1/Anxa2/P3h4/Efemp2/Plod3/P3h1/Fkbp10/Loxl3/Emilin1/Sfrp2
GO:0043302	positive regulation of leukocyte degranulation	23	-0.67299	-1.56705	0.0201606	0.0201606	0.0915767	2339	tags=43%, list=13%, signal=38%	Fgr/Adora2b/Gab2/Syk/Stxbp2/Fcer1g/Itgb2/Nppc/Ptafr/Gata2
GO:0061900	glial cell activation	53	-0.555699	-1.49949	0.0201638	0.0201638	0.0915767	3741	tags=53%, list=21%, signal=42%	Jak2/Pparg/Ifngr1/Trpv1/Tnf/App/Zeb2/Ctsc/Kcnn4/Egfr/Casp1/Aif1/Stap1/Tlr2/Grn/Il33/Tlr4/Tlr3/Trem2/C1qa/Csf1r/Clu/Tyrobp/Cx3cr1/Il1b/Tlr1/C5ar1/Kcnj8
GO:0015813	L-glutamate transmembrane transport	25	0.597608	1.67752	0.0201841	0.0201841	0.0915827	2443	tags=28%, list=14%, signal=24%	Slc1a6/Slc1a2/Slc1a3/Slc1a4/Itgb1/Slc7a11/Per2
GO:1990144	intrinsic apoptotic signaling pathway in response to hypoxia	13	0.701852	1.65518	0.0202227	0.0202227	0.091672	459	tags=38%, list=3%, signal=37%	Eno1/Bnip3/Eno1b/Hyou1/Nol3
GO:0048170	positive regulation of long-term neuronal synaptic plasticity	10	-0.825953	-1.62139	0.0202751	0.0202751	0.0918234	437	tags=30%, list=2%, signal=29%	Shank3/Kit/Kdr
GO:0006873	intracellular monoatomic ion homeostasis	449	-0.396823	-1.2864	0.0203006	0.0203006	0.091853	2151	tags=17%, list=12%, signal=15%	Cyb561/Cp/Hexb/Hfe/Atp6v0d2/Gm6377/Stc1/B2m/Tgm2/Lyn/Ubash3b/Cln6/Mcoln1/Xcl1/Grn/Ppt1/Atp2b4/Atp1b1/Plcg2/Wnk4/Pml/Ank2/Itpr3/Plcb1/Dmd/Grina/Cln3/Efhc1/Car7/Steap4/Rab20/Wnt5a/Dmpk/Tmem64/Cav1/P2rx7/Ptpn6/Steap3/Cxcl9/Cxcl10/Ednra/Slc24a5/Ccl8/Nr3c2/Slc8b1/Scara5/Slc25a27/Npy1r/Coro1a/Atp2a1/Tmc8/Cav2/Inpp4b/Slc11a1/Atp1b2/Ptprc/Ccr5/Grin2b/Tbxas1/Nppc/Hvcn1/Ccr2/Prkcb/Chd7/Clec4b1/Atp2a3/Casq2…
GO:0015721	bile acid and bile salt transport	13	-0.77616	-1.61028	0.0203572	0.0203572	0.0920229	1912	tags=31%, list=11%, signal=27%	Slc10a1/Slc10a6/Slco2b1/Ceacam1
GO:0032508	DNA duplex unwinding	43	0.492462	1.55323	0.0204631	0.0204631	0.0923329	4695	tags=58%, list=26%, signal=43%	Dtd1/Gins2/Mcm5/Mcm8/Mcm3/Ddx1/Anxa1/Mcm6/Rad51/Mcm4/Gins4/Ascc3/Recql/Upf1/Mcm2/Supv3l1/Gins1/Mnat1/Ddx11/Mcm7/Top2a/Nbn/Ercc3/Cdc45/Blm
GO:0001778	plasma membrane repair	27	0.575755	1.62579	0.0204639	0.0204639	0.0923329	5638	tags=63%, list=32%, signal=43%	Myh9/Cav3/Anxa2/Myh10/Chmp6/Chmp2a/Vps4a/Myof/Syt11/Dysf/Chmp1a/Chmp7/Trim72/Sytl4/Arl8b/Smpd1/Fer1l5
GO:0051304	chromosome separation	75	0.421658	1.4417	0.0205403	0.0205403	0.0925909	4916	tags=45%, list=28%, signal=33%	Anapc15/Spc24/Bub1/Cdc16/Cdk5rap2/Birc5/M1ap/Tpr/Trip13/Zwilch/Spdl1/Ube2c/Smc2/Zwint/Spc25/Plk1/Incenp/Aurkb/Cdca8/Ncaph2/Ncapg2/Pcid2/Csnk2a2/Klhl22/Mad2l1bp/Top2a/Dync1li1/Ik/Zw10/Kntc1/Haspin/Bub3/Anapc11/Anapc7
GO:0048147	negative regulation of fibroblast proliferation	43	-0.595845	-1.54413	0.0205684	0.0205684	0.0926314	1787	tags=23%, list=10%, signal=21%	Smarca2/Pmaip1/Cav1/Socs1/Trp53inp1/Ifi30/Mmp9/Cd300a/Dach1/Agtr2
GO:0031145	anaphase-promoting complex-dependent catabolic process	17	0.644773	1.6403	0.0206652	0.0206652	0.0929809	2587	tags=29%, list=14%, signal=25%	Ecrg4/Ube2s/Cdc16/Anapc4/Ube2c
GO:0140894	endolysosomal toll-like receptor signaling pathway	43	-0.594785	-1.54138	0.0207731	0.0207731	0.0933284	2122	tags=40%, list=12%, signal=35%	Rab7b/Tlr13/Epg5/Tnf/Irf2/Colec12/Cd86/Unc93b1/Irf1/Cav1/Tlr3/Oas1a/Oas1g/Oas1c/Pik3ap1/Rsad2/Tlr7
GO:1903046	meiotic cell cycle process	190	0.333672	1.32338	0.0207811	0.0207811	0.0933284	4091	tags=34%, list=23%, signal=26%	Grb14/Ooep/Ereg/Dnmt3l/Lif/Myh9/Suv39h2/Nsun2/Calr/Cks2/Syce2/Brip1/Cenpx/Wnt4/Mcm5/Cyp26b1/Ccne1/Tubg1/Ccne2/Ddb1/Mcm3/Actr3/Hspa2/Birc5/Syde1/M1ap/Psmd13/Pkmyt1/Mcm6/Trip13/Camk2b/Topbp1/Spire1/Cenps/Rad51/Mcm4/Rad54l/Smc2/Zwint/Psmc3ip/Chtf18/Dcaf13/Tex15/Hsf1/Plk1/Incenp/Slx4/Bag6/Tdrkh/Fignl1/Piwil2/Mcm2/Ncaph2/Edn1/Fanca/BC005624/Ythdf2/Mybl1/Mcm7/Prdm9/Mlh1/Ing2/Cdc25a/Ndc1
GO:2000564	regulation of CD8-positive, alpha-beta T cell proliferation	17	-0.727343	-1.59701	0.0209216	0.0209216	0.0938726	2396	tags=47%, list=13%, signal=41%	H2-Q7/Sh3rf1/H2-D1/Vsir/Irf1/H2-Q6/H2-T23/H2-Q4
GO:0055082	intracellular chemical homeostasis	607	-0.381934	-1.24067	0.0210032	0.0210032	0.0941511	2173	tags=16%, list=12%, signal=15%	Prkn/Cyb561/Cp/Hexb/Rab11fip2/Hfe/Atp6v0d2/Acacb/Gm6377/Stc1/B2m/Nnt/Tgm2/Lyn/Ubash3b/Cln6/Mcoln1/Sybu/Xcl1/Grn/Ppt1/Atp2b4/Pik3r2/Atp1b1/Zbtb20/Plcg2/Wnk4/Pml/Ank2/Itpr3/Plcb1/Dmd/Grina/Cln3/Efhc1/Car7/Steap4/Rab20/Wnt5a/Dmpk/Tmem64/Slc12a6/Cav1/P2rx7/Tcf7l2/Ptpn6/Steap3/Trem2/Cxcl9/Arrb1/Glul/Cxcl10/Ednra/Slc24a5/Ogt/Kcnb1/Ccl8/Nr3c2/Gpld1/Slc8b1/Scara5/Slc25a27/Npy1r/Coro1a/Camk2n1/Atp2a1/Tmc8…
GO:0006694	steroid biosynthetic process	127	0.365248	1.36549	0.0210237	0.0210237	0.0941561	1951	tags=28%, list=11%, signal=25%	Fdps/Sqle/Dhcr24/Idi1/Cyp51/Msmo1/Hmgcs1/Mvd/Fdft1/Insig1/Mvk/Bmpr1b/Bmp6/Hmgcr/Hsd17b7/Stard4/Nfkb1/Ebp/Apoa1/Lss/Snai1/Pmvk/Acbd3/Wnt4/Srebf2/Tecr/Dhcr7/Tspo/Nr1d1/Star/Erg28/Tm7sf2/Cyb5r3/Hsd17b12/Scp2
GO:0048025	negative regulation of mRNA splicing, via spliceosome	23	0.596596	1.64478	0.0210864	0.0210864	0.0943491	5007	tags=70%, list=28%, signal=50%	C1qbp/Srsf7/Ptbp1/Srsf10/Npm1/Sap18b/Pcbp4/Srsf9/Rbm42/Sap18/Hnrnpa2b1/Rnps1/Rbm10/Srsf6/Hnrnpk/Acin1
GO:2001185	regulation of CD8-positive, alpha-beta T cell activation	27	-0.679626	-1.63326	0.0211095	0.0211095	0.0943655	2396	tags=48%, list=13%, signal=42%	H2-Q7/Sh3rf1/H2-D1/Hfe/Vsir/Irf1/Socs1/H2-Q6/H2-T23/Cd274/Nckap1l/H2-Q4/Lilrb4a
GO:0070296	sarcoplasmic reticulum calcium ion transport	30	-0.627773	-1.53276	0.0212033	0.0212033	0.0946972	1456	tags=27%, list=8%, signal=25%	Ank2/Dmd/Mrln/Atp2a1/Ccr5/Chd7/Casq2/Pln
GO:0035640	exploration behavior	34	-0.633688	-1.58153	0.0213571	0.0213571	0.0952961	437	tags=21%, list=2%, signal=20%	Itga3/Grn/Shank3/Lsamp/Atp1a2/Gad1/Agtr2
GO:0042116	macrophage activation	93	-0.506117	-1.44862	0.0215317	0.0215317	0.0959714	3472	tags=45%, list=19%, signal=37%	Ifngr1/Trpv1/Tnf/Lbp/App/Ctsc/Kcnn4/Cebpa/Myo18a/Casp1/Aif1/Nr1h3/Shpk/Stap1/Gpr137b/Tlr2/Grn/Sbno2/Nmi/Plcg2/Il33/Tmem229b/Wnk4/Cd200/Tlr4/Wnt5a/Tlr3/Trem2/C1qa/Syk/Csf1r/Irgm1/Clu/Tyrobp/Il10/Cx3cr1/Tlr1/C5ar1/Slc11a1/Cd84/Kcnj8/Adgrf5
GO:1903169	regulation of calcium ion transmembrane transport	154	-0.470234	-1.43246	0.0215508	0.0215508	0.0959714	1904	tags=21%, list=11%, signal=19%	Lyn/Ubash3b/Bmp4/Agtr1a/Atp1b1/Plcg2/Pml/Ank2/Dmd/Zfas1/Gjc2/Cav1/P2rx7/Ptpn6/Cxcl9/Cxcl10/Mrln/Ednra/Rem1/Plp1/Ahr/Coro1a/Rapgef3/Adcyap1r1/Chd7/Clec4b1/Casq2/Atp1a2/Trpc3/Pln/Tspan13/Aplnr/Gimap5
GO:0036037	CD8-positive, alpha-beta T cell activation	39	-0.603936	-1.54809	0.021568	0.021568	0.0959714	2396	tags=41%, list=13%, signal=36%	H2-Q7/Sh3rf1/H2-D1/Hfe/Vsir/Irf1/Igtp/Satb1/Socs1/H2-Q6/H2-T23/Cd274/Nckap1l/H2-Q4/Lilrb4a/Gimap1
GO:0006936	muscle contraction	277	-0.422475	-1.33743	0.0215923	0.0215923	0.0959915	2048	tags=21%, list=11%, signal=19%	Map2k6/Shc1/Stc1/Gaa/Adora2b/Met/Gsn/Adra1a/Uty/Scn2b/Ttn/Atp2b4/Atp1b1/Mybpc1/Ank2/Ptgs1/Dmd/Zfas1/Synm/Kcnj2/Jup/Tmod2/Tshz3/Ncf1/Tnni2/Dmpk/Cav1/Actc1/Kcnh2/Tmod1/Agrn/Tbx2/Ednra/Rem1/Calcrl/Rcsd1/Cd38/Myh1/Kcna1/Npy1r/Atp2a1/Cacna1h/Cxcr4/Tifab/Gucy1a1/Ptafr/Abcc9/Ednrb/Flt1/Casq2/Chrm2/Atp1a2/Kit/Edn3/Kcnj8/Myh11/Pln/Kcna5
GO:0006071	glycerol metabolic process	18	0.646152	1.65487	0.0216428	0.0216428	0.0961277	3904	tags=56%, list=22%, signal=43%	Tpi1/Dgat2/Pgp/Mogat2/Got1/Coq2/Coq3/Myof/Gk5/Dysf
GO:0032288	myelin assembly	25	-0.662045	-1.56289	0.0217949	0.0217949	0.0967141	2430	tags=32%, list=14%, signal=28%	Epb41l3/Abca2/Tppp/Tlr2/Cntnap1/Cd9/Ncmap/Tenm4
GO:0072109	glomerular mesangium development	15	-0.750313	-1.59757	0.0219728	0.0219728	0.0974143	1845	tags=40%, list=10%, signal=36%	Notch1/Bmp4/C3ar1/Gpr4/Bmp7/Pdgfb
GO:0043547	positive regulation of GTPase activity	214	-0.448299	-1.39991	0.0220378	0.0220378	0.0975811	2402	tags=26%, list=13%, signal=23%	Rap1gap/Rasgrp1/Dock11/Ralgapa2/Arhgap24/Ccl9/Prex1/Agap2/Arap2/Ralgapa1/Plxnb1/Gnas/Rab11fip2/Rasgef1b/Gmip/Ralgps2/Xcl1/Dock10/Dennd1b/Tbc1d16/Agap1/Tbc1d4/Epha2/Arhgap6/Wnt5a/Ccl4/Ralgds/Ccl3/Rapgef4/Chn1/Sgsm2/Rgma/Arap3/Grtp1/Dock6/Ccl8/Sema4d/Arhgap45/Dock8/Rapgef3/Dock9/Gpr65/Cav2/Adap2/Prex2/Ntf3/Ccl6/Arhgap25/Rasgrp3/Ccl11/Rgs1/Ccl12/Arhgef15/Itga6/Rasgrf2
GO:0046039	GTP metabolic process	25	0.588323	1.65145	0.0220508	0.0220508	0.0975811	2870	tags=40%, list=16%, signal=34%	Ak4/Nme1/Ran/Nme2/Impdh1/Impdh2/Nme6/Rhoq/Rab23/Efl1
GO:0030307	positive regulation of cell growth	172	0.342791	1.32676	0.022342	0.022342	0.0987796	2724	tags=27%, list=15%, signal=23%	Fdps/Mfsd2a/Ngf/Nrg1/Hbegf/Tnfrsf12a/Smad7/Vegfa/Sfrp1/Ccn4/Picalm/Sgk1/Exosc4/Pin1/Dbnl/Slc25a4/Map1b/Avpr1a/Prr5/Ddx49/Fxn/Sfrp2/Cfl1/Dbn1/Sh3glb1/Ncbp1/Exosc2/Trpv2/Cib1/Acsl4/Eif4g1/Eif2b2/N6amt1/Derl2/Sphk1/Tead1/Eif4g2/Srf/Slc25a33/Ilk/Mtpn/Dnph1/Mapkap1/Fn1/Sirt1/Usp47/Ino80
GO:0003016	respiratory system process	45	-0.598936	-1.57171	0.0225521	0.0225521	0.0996173	422	tags=13%, list=2%, signal=13%	Tshz3/Hmga1/Jag2/Atp1a2/Flt4/Tcf15
GO:0051306	mitotic sister chromatid separation	58	0.455808	1.49758	0.0226196	0.0226196	0.0998245	4916	tags=50%, list=28%, signal=36%	Anapc15/Spc24/Bub1/Cdc16/Cdk5rap2/Birc5/Tpr/Trip13/Zwilch/Spdl1/Ube2c/Zwint/Spc25/Plk1/Incenp/Aurkb/Cdca8/Ncaph2/Pcid2/Klhl22/Mad2l1bp/Dync1li1/Ik/Zw10/Kntc1/Haspin/Bub3/Anapc11/Anapc7
GO:0030323	respiratory tube development	207	-0.440932	-1.37444	0.0227649	0.0227649	0.100327	2026	tags=21%, list=11%, signal=19%	Aldh1a2/Sp3/Zfp157/Tmem67/Notch1/Bmp4/Ccdc40/Sox11/Itga3/Thrb/Gli2/Meg3/Tshz3/Gpc3/Wnt5a/Ccdc39/Nfib/Abca3/Rdh10/Spry2/Spry1/Pthlh/Tbx2/Hmga2/Epas1/Fgfr4/Igfbp5/Pdgfra/Acvr2b/Fgf10/Ace/Hopx/Hmga1/Fgf1/Nos3/Gli1/Flt4/Lama5/Hhex/Hhip/Eya1/Kdr/Stra6
GO:0044403	biological process involved in symbiotic interaction	201	-0.440735	-1.37144	0.0227897	0.0227897	0.100327	2080	tags=24%, list=12%, signal=21%	Prkn/Insr/Trim5/Axl/Fbln1/Gsn/Ifitm6/Agtr1a/Dynlt1a/Igf2r/Dynlt1b/Trim6/Trim25/Dynlt1c/Ctsb/Trim12c/Tpcn1/Zfyve1/Ciita/Tfap4/Fuca2/Ly6e/Trim30d/Ncf1/Trim12a/Trim21/Scarb1/Cav1/Fbxl2/Csf1r/Bcl2l11/Hmga2/Trim30a/Ccl8/Gbp7/Cx3cr1/Trim34a/Gbp2/Cd74/Cav2/Pglyrp1/Ifitm1/Ch25h/Gbp3/Nod2/Gbp6/Gbp9/Lef1
GO:0006949	syncytium formation	62	-0.551899	-1.51496	0.0228153	0.0228153	0.100327	1783	tags=29%, list=10%, signal=26%	Cxcl12/Myod1/Sbno2/Ehd2/Dyrk1b/Flt3l/Trem2/Cxcl9/Cxcl10/Tyrobp/Gdf15/Cd9/Ccl8/Adamts15/Rapgef3/Dock2/Cd53/Ripor2
GO:0099537	trans-synaptic signaling	637	-0.380273	-1.23466	0.0228164	0.0228164	0.100327	1957	tags=20%, list=11%, signal=19%	Rara/Sncaip/Nrn1/Plat/Slc29a1/L1cam/Dmxl2/Grik5/Gabra3/Lnpep/Cyth1/Myo6/Disc1/Bcl2l1/Igsf9b/Mef2c/Nalcn/Git2/Lzts1/Cyp46a1/Nr3c1/Aph1c/Ston2/Ptprd/Cacna1b/Adarb1/Grm8/Eif4ebp2/Fyn/Zdhhc2/Prkn/Ophn1/Arrb2/Synj1/Pink1/Npr2/Adora2b/Met/Stx1b/Ptn/Cacna2d2/Rnf167/Fbxl20/Adra1a/Prrt2/Sybu/Sv2c/Ppt1/P2rx6/Akap7/Ppfia2/Syngr1/Dagla/Mgll/Itpr3/Cplx2/Mme/Plcb1/Dmd/Slc38a1/Cln3/Cacng7/Tmod2/Akap12/Syngap1/T…
GO:0044344	cellular response to fibroblast growth factor stimulus	88	-0.511657	-1.45991	0.0229153	0.0229153	0.100635	1575	tags=22%, list=9%, signal=20%	Zfp36l1/Smoc2/Zfp36/Wnt5a/Tcf7l2/Ndnf/Spry2/Spry1/Tbx2/Fgfr4/Spry4/Fgf10/Fgf16/Fgf1/Flrt1/Ngfr/Hhip/Pdgfb/Dll4
GO:0072574	hepatocyte proliferation	29	-0.652958	-1.58511	0.0229489	0.0229489	0.100635	1913	tags=28%, list=11%, signal=25%	Rps6ka1/Ptn/Notch2/Prox1/Lims2/Fgf1/Gli1/Ceacam1
GO:0072575	epithelial cell proliferation involved in liver morphogenesis	29	-0.652958	-1.58511	0.0229489	0.0229489	0.100635	1913	tags=28%, list=11%, signal=25%	Rps6ka1/Ptn/Notch2/Prox1/Lims2/Fgf1/Gli1/Ceacam1
GO:0001933	negative regulation of protein phosphorylation	292	-0.416441	-1.32277	0.0232153	0.0232153	0.101711	2185	tags=20%, list=12%, signal=17%	Fbxo7/Prkn/Ctdspl/Insr/Dgkq/Arrb2/Nnt/Atg14/Fbln1/Lyn/Met/Nr2f2/Ubash3b/Pkn1/Spred2/Pid1/Wnk4/Irf1/Dmd/Sh3bp5/Tfap4/Dbndd2/Cav1/Ptpn6/Gadd45a/Socs1/Arrb1/Spry2/Spry1/Deptor/Socs3/Ogt/Prkch/Parp14/Sema4d/Samsn1/Spry4/Plpp3/Camk2n1/Il1b/Xdh/Ptpro/Lilrb4a/Pkib/Ptprc/Ntf3/Cdkn1c/Rassf2/Cadm1/Cd300a/Fabp4/Hhex/Pecam1/Rasip1/Ptprb/Ceacam1/Gbp4
GO:0045187	regulation of circadian sleep/wake cycle, sleep	18	0.642378	1.6452	0.0233238	0.0233238	0.10202	752	tags=17%, list=4%, signal=16%	Csf2/Ptger3/Ada
GO:0072087	renal vesicle development	14	0.714885	1.73583	0.0233281	0.0233281	0.10202	1546	tags=43%, list=9%, signal=39%	Kif26b/Lif/Gdnf/Wnt4/Six2/Sox9
GO:0042749	regulation of circadian sleep/wake cycle	20	0.61084	1.62562	0.0233629	0.0233629	0.102065	1432	tags=20%, list=8%, signal=18%	Csf2/Ptger3/Ada/Nr1d1
GO:0046605	regulation of centrosome cycle	53	0.456732	1.48312	0.0233806	0.0233806	0.102065	3510	tags=38%, list=20%, signal=30%	Plk2/Nat10/Nubp1/Stil/Ccnf/Plk4/Cdk5rap2/Npm1/Cdk11b/Azin1/Ccnl1/Ppp1r35/Sirt1/Rock2/Cep295nl/Nup62/Kat2a/Chmp2a/Pdcd6ip/Mark4
GO:0051091	positive regulation of DNA-binding transcription factor activity	205	-0.441387	-1.37393	0.0234968	0.0234968	0.10248	2143	tags=24%, list=12%, signal=21%	Ddr2/Ticam2/Trim5/Rps6ka5/Card14/Traf5/Pink1/Tlr2/Ikbke/Ppargc1b/Trim14/Plcg2/Trim6/Aim2/Trim25/Tgfbr3/Trim12c/Nfam1/Cd200/Trim30d/Jup/Tlr4/Wnt5a/Trim12a/Trim21/Tlr3/Nlrp3/Eda/Ror1/Traf1/Camk1d/Sp100/Clu/Prkch/Trim30a/Tnfrsf11a/Il10/Trim34a/Plpp3/Il1b/Esr1/Card11/Fcgr2b/Nod2/Cd84/Eda2r/Reln/Kit/Cd36
GO:0002763	positive regulation of myeloid leukocyte differentiation	65	-0.561289	-1.56059	0.0235876	0.0235876	0.102783	1779	tags=38%, list=10%, signal=35%	Ripk1/Itgb3/Asxl2/Fos/Ccl9/Gnas/Ppargc1b/Zfp36l1/Stat5a/Il34/Notch2/Tmem64/Ccl3/Trem2/Csf1r/Tyrobp/Tnfrsf11a/Il23a/Ikzf1/Cd74/Hcls1/Kitl/Lef1/Tesc/Dlk1
GO:0050686	negative regulation of mRNA processing	24	0.583192	1.61762	0.0236842	0.0236842	0.103029	5600	tags=75%, list=31%, signal=52%	C1qbp/Srsf7/Ptbp1/Srsf10/Npm1/Sap18b/Pcbp4/Srsf9/Rbm42/Sap18/Hnrnpa2b1/Rnps1/Rbm10/Srsf6/Hnrnpk/Acin1/Zc3h14/U2af2
GO:0050804	modulation of chemical synaptic transmission	489	-0.388496	-1.25726	0.0237067	0.0237067	0.103029	1957	tags=15%, list=11%, signal=14%	Pink1/Adora2b/Met/Stx1b/Ptn/Cacna2d2/Rnf167/Fbxl20/Adra1a/Prrt2/Sybu/Sv2c/Akap7/Ppfia2/Syngr1/Mgll/Itpr3/Cplx2/Mme/Plcb1/Slc38a1/Cln3/Cacng7/Akap12/Syngap1/Tshz3/Car7/Wnt5a/Begain/Dmpk/Lama2/P2rx7/Rapgef4/Kcnq4/Dgkb/Glul/Agrn/Efnb3/Tyrobp/Kcnb1/Ntrk2/Mctp1/Nr3c2/Cd38/Pirb/Rapsn/Cx3cr1/Npy1r/Pcdh17/Il1b/Kmo/Srgn/Mmp9/Nrgn/Ace/Shank3/Gucy1b1/Prrt1/Fcgr2b/Ntf3/Gucy1a1/Grin2b/Ppp1r9a/Ccr2/Prkcb/Reln/…
GO:0030326	embryonic limb morphogenesis	122	-0.482487	-1.43826	0.0237298	0.0237298	0.103029	2732	tags=30%, list=15%, signal=25%	Tbx5/Dync2h1/Gja5/Osr1/Crabp2/Ift122/Gli3/Gnas/Ece1/Lmbr1/Hoxa9/C2cd3/Reck/Aldh1a2/Osr2/Gja1/Notch1/Tbc1d32/Bmp4/Wdr19/Map3k20/Hoxd9/Lrp4/Gli2/Notch2/Gpc3/Wnt5a/Ptch1/Rdh10/Gas1/Rarb/Bcl2l11/Tbx2/Chd7/Bmp7/Lef1
GO:0035113	embryonic appendage morphogenesis	122	-0.482487	-1.43826	0.0237298	0.0237298	0.103029	2732	tags=30%, list=15%, signal=25%	Tbx5/Dync2h1/Gja5/Osr1/Crabp2/Ift122/Gli3/Gnas/Ece1/Lmbr1/Hoxa9/C2cd3/Reck/Aldh1a2/Osr2/Gja1/Notch1/Tbc1d32/Bmp4/Wdr19/Map3k20/Hoxd9/Lrp4/Gli2/Notch2/Gpc3/Wnt5a/Ptch1/Rdh10/Gas1/Rarb/Bcl2l11/Tbx2/Chd7/Bmp7/Lef1
GO:0040036	regulation of fibroblast growth factor receptor signaling pathway	32	-0.637215	-1.57411	0.0237505	0.0237505	0.103029	1445	tags=28%, list=8%, signal=26%	Smoc2/Wnt5a/Tcf7l2/Spry2/Spry1/Spry4/Ngfr/Hhip/Pdgfb
GO:0009066	aspartate family amino acid metabolic process	30	0.539575	1.56668	0.0238826	0.0238826	0.103509	2391	tags=47%, list=13%, signal=40%	Ass1/Asns/Plod2/Gcat/Phgdh/Mthfd1/Plod3/Mtap/Mri1/Got1/Aasdhppt/Atf4/Asrgl1/Got2
GO:0045453	bone resorption	65	-0.559247	-1.55491	0.0239711	0.0239711	0.1038	3167	tags=40%, list=18%, signal=33%	Nf1/Ptger4/Egfr/Tcirg1/Nox4/Itgb3/Plekhm1/Gpr137b/Pdk4/Acp5/Ubash3b/Ppargc1b/Tpp1/Tmem64/P2rx7/Syk/Csf1r/Ctss/Tnfrsf11a/Cd38/Inpp5d/Rac2/S1pr1/Fcgr4/Dlk1/Ceacam1
GO:0048066	developmental pigmentation	47	-0.585552	-1.55455	0.0240635	0.0240635	0.104107	929	tags=23%, list=5%, signal=22%	Lrmda/Bcl2l11/Ednra/Slc24a5/Mitf/Grk3/Spns2/Kitl/Ednrb/Kit/Edn3
GO:0051480	regulation of cytosolic calcium ion concentration	52	-0.567866	-1.52754	0.0241104	0.0241104	0.104216	1640	tags=21%, list=9%, signal=19%	Atp2b4/Cln3/Wnt5a/Tmem64/Cav1/Slc8b1/Npy1r/Cav2/Grin2b/Trpc3/P2ry1
GO:0048024	regulation of mRNA splicing, via spliceosome	99	0.377101	1.34092	0.0241593	0.0241593	0.104334	3664	tags=39%, list=21%, signal=31%	Jmjd6/Prdx6/C1qbp/Wdr77/Srsf3/Ncl/Srsf2/Srsf7/Ptbp1/Magoh/Eif4a3/Ncbp1/Srsf10/Eif1/Prmt5/Npm1/Sap18b/Rbm3/Hnrnpu/Pcbp4/Rbmx/Prpf19/Hspa8/Srsf9/Upf3a/Dazap1/Puf60/Clns1a/Rest/Rbm42/Sap18/Sf1/Srrm1/Hnrnpa2b1/Rbm8a/Sf3b4/Upf1/Srrm4/Rnps1
GO:0014074	response to purine-containing compound	95	-0.511743	-1.47253	0.0242853	0.0242853	0.104785	2030	tags=26%, list=11%, signal=23%	Dgkq/Npr2/Pde3a/Irs1/P2rx6/P2ry12/Akap7/Plcg2/Zfp36l1/Itpr3/P2ry6/P2rx7/Pde2a/Igfbp5/Ahr/Il1b/Rapgef3/Hmga1/Tlr7/Abcc9/Casq2/Aqp1/Trpc3/Kcnj8/P2ry1
GO:0042168	heme metabolic process	33	0.527867	1.58272	0.0243631	0.0243631	0.105027	3967	tags=42%, list=22%, signal=33%	Fxn/Cpox/Tmem14c/Abcb6/Hmox1/Alad/Hmbs/Cox10/Uros/Snx3/Slc11a2/Pgrmc1/Hpx/Blvra
GO:0002761	regulation of myeloid leukocyte differentiation	127	-0.476945	-1.42814	0.0243945	0.0243945	0.105069	2256	tags=28%, list=13%, signal=25%	Clec2d/Ccl9/Gnas/Gpr137b/Lyn/Ubash3b/Ppargc1b/Zfp36l1/Stat5a/Il34/Notch2/Tmem64/Ccl3/Trem2/C1qc/Csf1r/Zbtb46/Mitf/Tyrobp/Prxl2a/Tnfrsf11a/Pirb/Il23a/Ikzf1/Inpp5d/Cd74/Lilrb4a/Inpp4b/Hcls1/Rassf2/Kitl/Gata2/Lef1/Tesc/Dlk1/Ceacam1
GO:0000723	telomere maintenance	142	0.35259	1.31959	0.0244308	0.0244308	0.105132	3590	tags=34%, list=20%, signal=27%	Nhp2/Nat10/Hsp90aa1/Cct3/Gar1/Ruvbl2/Cct7/Pinx1/Lmna/Cct6a/Ccne1/Tcp1/Xrcc6/Cct2/Gnl3/Ccne2/Apex1/Dkc1/Cct8/Hnrnpu/Cct5/Nop10/Ercc1/Rad51/Uchl5/Hnrnpd/Parp1/Ruvbl1/Smg5/Ino80/Cct4/Xrcc5/Hnrnpa2b1/Pcna/Bmyc/Tfpt/Yy1/Dclre1b/Rpa2/Slx4/Ptges3/Aurkb/Ppp1r10/Trp53/Zfp365/Myc/Upf1/Ino80e
GO:0055021	regulation of cardiac muscle tissue growth	71	0.420347	1.42907	0.0245301	0.0245301	0.105455	1144	tags=17%, list=6%, signal=16%	Fdps/Rgs4/Nrg1/Wnt2/Rbp4/Ccn4/Cav3/Ncam1/Pin1/Slc25a4/Cited2/Ctdp1
GO:2000288	positive regulation of myoblast proliferation	16	-0.732261	-1.58825	0.0245806	0.0245806	0.105455	937	tags=25%, list=5%, signal=24%	Atf2/Csf1r/Pax7/Kcna5
GO:0043414	macromolecule methylation	159	0.336134	1.27319	0.0246285	0.0246285	0.105455	4665	tags=38%, list=26%, signal=29%	Dnmt3l/Trmt61a/Fam98a/Gspt1/Ntmt1/Ftsj3/Fbl/Eef1akmt1/Prmt1/Etf1/Nsun2/Hells/Comt/Bud23/Nop2/Eef1akmt3/Trmt6/Dimt1/Btg2/Kmt5a/Atpsckmt/Prmt5/Wdr4/Snrpd3/N6amt1/Snrpb/Smyd2/Pcmt1/Smarca5/Prmt3/Wdr5/Mettl2/Prmt7/Parp1/Dubr/Dnmt1/Eef2kmt/Tex15/Hsd17b10/Setd6/Carm1/Mettl1/Trmt10a/Arid4b/Mettl16/Rlf/Bcdin3d/Arid4a/Ndufaf7/Rab6a/Zc3h13/Trmt10c/Eef1akmt2/Mettl6/Nsun4/Prmt2/Rbm15b/Emg1/Tfb2m/Tarbp1/Smchd1
GO:0002687	positive regulation of leukocyte migration	153	-0.468896	-1.42869	0.024633	0.024633	0.105455	2007	tags=28%, list=11%, signal=25%	Itga2b/Tlr2/Cxcl14/Ptn/Vegfc/Cxcl12/Xcl1/P2ry12/Il34/C3ar1/Wnt5a/Trem2/Csf1r/Cxcl10/Camk1d/Ednra/Defb25/Sele/Spi1/Dapk2/Il23a/Dock8/Cx3cr1/Lyve1/Coro1a/Il1b/Nckap1l/Selp/Cd74/Jam2/C5ar1/Rac2/Mmp9/Itga4/Pla2g7/Ccr2/Kitl/Plvap/Ccl12/Ptafr/Ripor2/Edn3/Pecam1
GO:1905145	cellular response to acetylcholine	37	-0.609877	-1.54938	0.0246367	0.0246367	0.105455	2977	tags=35%, list=17%, signal=29%	Chrnb1/Anxa7/Sorbs1/Sorbs2/Orai1/Atp2b4/Ly6a/Plcb1/Ly6e/Ly6c1/Ly6h/Prkcb/Chrm2
GO:0046006	regulation of activated T cell proliferation	37	-0.609799	-1.54919	0.0246367	0.0246367	0.105455	1827	tags=30%, list=10%, signal=27%	Cd86/Stat5a/Icosl/Lrrc32/Tnfsf9/Laptm5/Il23a/Cd274/Cd24a/Lilrb4a/Igf2
GO:0032259	methylation	222	0.313294	1.26207	0.0247023	0.0247023	0.105642	4331	tags=34%, list=24%, signal=26%	Dnmt3l/Trmt61a/Fam98a/Smyd5/Gspt1/Ntmt1/Ftsj3/Fbl/Eef1akmt1/Prmt1/Etf1/Pemt/Suv39h2/Nsun2/Hells/Comt/Bud23/Mtap/Nop2/Nnmt/Spout1/Eef1akmt3/Trmt6/Dimt1/Rrp8/Ndufaf5/Btg2/Tyms/Kmt5a/Atpsckmt/Prmt5/Wdr4/Snrpd3/N6amt1/Snrpb/Smyd2/Pcmt1/Mettl9/Smarca5/Smyd3/Prmt3/Wdr5/Mettl2/Prmt7/Gamt/Parp1/Dph5/Nsd3/Coq3/Dubr/Rnmt/Dnmt1/Eef2kmt/Carnmt1/Tex15/Hsd17b10/Nsd2/Setd6/Carm1/Mettl1/Trmt10a/Mtr/Arid4b/Mettl1…
GO:0010922	positive regulation of phosphatase activity	26	-0.638873	-1.51932	0.0247296	0.0247296	0.105665	591	tags=35%, list=3%, signal=34%	Npnt/Mef2c/Itga1/Ppargc1b/Plek/Chp2/Ptprc/Cd300a/Agtr2
GO:0019883	antigen processing and presentation of endogenous antigen	24	-0.66573	-1.56164	0.0248744	0.0248744	0.106082	2692	tags=50%, list=15%, signal=43%	Tapbp/Tap2/H2-Q7/H2-D1/Hfe/B2m/Tap1/H2-Q6/H2-T23/H2-T24/H2-Q4/Mill2
GO:0043114	regulation of vascular permeability	42	-0.587117	-1.51955	0.0248864	0.0248864	0.106082	1919	tags=29%, list=11%, signal=26%	Pde3a/Amot/Ptp4a3/Akap12/Ccl4/Ramp2/Pde2a/Gpr4/Plvap/Ceacam1/Cdh5/Cldn5
GO:0045579	positive regulation of B cell differentiation	18	-0.720541	-1.60683	0.0249027	0.0249027	0.106082	2629	tags=56%, list=15%, signal=47%	Mmp14/Stat5b/Atp11c/Stat5a/Syk/Spi1/Il10/Nckap1l/Il2rg/Inpp5d
GO:0035050	embryonic heart tube development	74	-0.524895	-1.47414	0.0249309	0.0249309	0.106082	2643	tags=31%, list=15%, signal=27%	Mef2c/Gja5/Tead2/Vangl2/Ift122/Ece1/C2cd3/Aldh1a2/Gja1/Notch1/Ccdc40/Smad3/Foxc1/Tmem94/Dll1/Notch2/Wnt5a/Ccdc39/Tbx2/Ednra/Hhex/Sox18/Aplnr
GO:0032490	detection of molecule of bacterial origin	13	-0.766419	-1.59007	0.0249369	0.0249369	0.106082	1947	tags=62%, list=11%, signal=55%	Tlr2/Tlr4/Casp4/Scarb1/Trem2/Ly96/Tlr1/Nod2
GO:0060700	regulation of ribonuclease activity	11	-0.787617	-1.58089	0.0250167	0.0250167	0.106271	1958	tags=73%, list=11%, signal=65%	Oasl1/Pde3a/Oas1a/Oas1g/Oas1c/Oasl2/Oas2/Oas3
GO:0002399	MHC class II protein complex assembly	10	-0.815864	-1.60158	0.0250604	0.0250604	0.106271	1975	tags=80%, list=11%, signal=71%	H2-Oa/B2m/H2-DMb1/H2-DMa/H2-Ab1/H2-Eb1/H2-Aa/H2-DMb2
GO:0002503	peptide antigen assembly with MHC class II protein complex	10	-0.815864	-1.60158	0.0250604	0.0250604	0.106271	1975	tags=80%, list=11%, signal=71%	H2-Oa/B2m/H2-DMb1/H2-DMa/H2-Ab1/H2-Eb1/H2-Aa/H2-DMb2
GO:0030029	actin filament-based process	738	-0.371517	-1.20812	0.0250752	0.0250752	0.106271	3189	tags=25%, list=18%, signal=22%	Myo1b/Vill/Camk2d/Bcl2/Nf1/Taok1/Coro7/Nck1/Ptger4/Rhot2/Atxn3/Fchsd1/Cacna1d/Frmd5/Ppp1r9b/Tac1/Add2/Ccl24/Cdc42ep4/Frmpd4/Carmil1/Ep300/Akap13/Nox4/Rufy3/Myo18a/Itgb3/Fgd1/Rictor/Arhgap12/Actn2/Rhog/Arhgef5/Tnnt3/Marcks/Epha3/Parvg/Myo6/Mef2c/Fxyd1/Actn3/Gja5/Myo1f/Sorbs1/Llgl1/Clasp2/Prkcq/Epb41l1/Ppm1e/Alms1/Nrp1/Ccr7/Aif1/Pde4b/Acap2/Myo1g/Epb41l3/Washc5/Add3/Inpp5k/Ttc8/Stard13/Fgr/Nos1ap/A…
GO:0008090	retrograde axonal transport	24	0.579405	1.60711	0.0250911	0.0250911	0.106271	3926	tags=38%, list=22%, signal=29%	Mgarp/Nefl/Kif5b/Actr10/Map1a/Tmem108/Dst/Pafah1b1/Ndel1
GO:0048286	lung alveolus development	63	-0.537143	-1.48036	0.0251553	0.0251553	0.10645	1262	tags=16%, list=7%, signal=15%	Meg3/Pthlh/Fgfr4/Igfbp5/Fgf10/Ace/Hopx/Flt4/Kdr/Stra6
GO:0006383	transcription by RNA polymerase III	49	0.480246	1.55027	0.0252659	0.0252659	0.106824	2748	tags=33%, list=15%, signal=28%	Prdx5/Mybbp1a/Polr3k/Gtf3c6/Ddx21/Polr3h/Polr3e/Polr2e/Ice1/Polr3d/Smarca5/Myo1c/Polr3g/Gtf3c5/Snapc1/Polr1d
GO:0007423	sensory organ development	506	-0.386441	-1.25207	0.025355	0.025355	0.107087	2375	tags=22%, list=13%, signal=19%	Osr1/Mertk/Spred1/Ttc8/Sall2/Miat/Itga8/Lrig1/Mab21l1/Vangl2/Gsdme/Ift122/Sh3pxd2b/Crybg3/Slitrk6/Gli3/Rpgr/Ece1/Aldh1a2/Sp3/Sipa1l3/Sdk2/Meis1/Osr2/Zeb1/Cxcl14/Ptn/Gja1/Ifi204/Notch1/Tbc1d32/Twsg1/Bmp4/Wdr19/Psap/Sox11/Grn/Smad3/Foxc1/Spred2/Triobp/Thrb/Col4a1/Gli2/Epha2/Tfap4/Dll1/Cys1/Bmp5/Map3k1/Notch2/Vstm4/Wnt5a/H2-DMa/Nfib/Tspan12/Ntn1/Dcx/Rdh10/Lin7a/Ror1/Cebpd/Kcnq4/Tmod1/Gas1/Rpgrip1/Ra…
GO:0045840	positive regulation of mitotic nuclear division	38	-0.595505	-1.52066	0.0253724	0.0253724	0.107087	560	tags=21%, list=3%, signal=20%	Insr/Egf/Met/Il1b/Cd28/Edn3/Igf2/Pdgfb
GO:0099177	regulation of trans-synaptic signaling	490	-0.383816	-1.24211	0.0254323	0.0254323	0.107247	1957	tags=15%, list=11%, signal=14%	Pink1/Adora2b/Met/Stx1b/Ptn/Cacna2d2/Rnf167/Fbxl20/Adra1a/Prrt2/Sybu/Sv2c/Akap7/Ppfia2/Syngr1/Mgll/Itpr3/Cplx2/Mme/Plcb1/Slc38a1/Cln3/Cacng7/Akap12/Syngap1/Tshz3/Car7/Wnt5a/Begain/Dmpk/Lama2/P2rx7/Rapgef4/Kcnq4/Dgkb/Glul/Agrn/Efnb3/Tyrobp/Kcnb1/Ntrk2/Mctp1/Nr3c2/Cd38/Pirb/Rapsn/Cx3cr1/Npy1r/Pcdh17/Il1b/Kmo/Srgn/Mmp9/Nrgn/Ace/Shank3/Gucy1b1/Prrt1/Fcgr2b/Ntf3/Gucy1a1/Grin2b/Ppp1r9a/Ccr2/Prkcb/Reln/…
GO:0050688	regulation of defense response to virus	61	-0.554006	-1.51724	0.0256117	0.0256117	0.107909	1563	tags=28%, list=9%, signal=26%	Parp9/Trim6/Aim2/Apobec3/Zc3hav1/Pml/Igtp/Traf3ip2/Dtx3l/Cd37/Irgm2/Irgm1/Il23a/Il15/Il1b/Fgl2/Gbp4
GO:0032261	purine nucleotide salvage	16	0.654382	1.6399	0.0259401	0.0259401	0.109198	2243	tags=50%, list=13%, signal=44%	Ampd1/Ada/Gmpr2/Impdh1/Adsl/Gmps/Impdh2/Aprt
GO:0006959	humoral immune response	153	-0.465562	-1.41853	0.0259921	0.0259921	0.109321	1993	tags=29%, list=11%, signal=26%	Bcl3/B2m/Serping1/Cxcl14/Notch1/Cxcl12/Ppl/Masp1/Notch2/H2-DMa/Cd55/Traf3ip2/Ptpn6/Trem2/Cxcl9/C2/C1qa/C1qc/Cd37/C1qb/C1ra/Colec11/Cxcl10/Gpr183/Tslp/Cd46/Ccl8/H2-Q6/Tnfrsf21/C1s1/H2-T23/Spns2/Il1b/H2-Q4/Cfh/Pglyrp1/Ptprc/Fcgr2b/Nod2/Spon2/Ccr2/Ccl11/Ighm/Gimap5
GO:0007080	mitotic metaphase chromosome alignment	56	0.478409	1.55936	0.0260367	0.0260367	0.109414	4292	tags=43%, list=24%, signal=33%	Pinx1/Rrs1/Kpnb1/Cdca5/Birc5/Hnrnpu/Nudc/Spdl1/Mapre1/Sirt1/Chmp6/Nup62/Rab11a/Snhg15/Incenp/Chmp2a/Aurkb/Vps4a/Cdca8/Seh1l/Chmp1a/Dctn2/Chmp7/Eml4
GO:0034134	toll-like receptor 2 signaling pathway	17	-0.720101	-1.58111	0.0260759	0.0260759	0.109457	1947	tags=35%, list=11%, signal=31%	Tlr2/Lyn/Trem2/Pik3ap1/Tlr1/Nod2
GO:0032527	protein exit from endoplasmic reticulum	41	0.500947	1.57378	0.0260923	0.0260923	0.109457	4099	tags=61%, list=23%, signal=47%	Insig1/Sec61b/Selenos/H13/Sar1a/Rangrf/Tmem30b/Derl1/Sec13/Vcp/Derl2/Preb/Sar1b/Ube2j1/Edem1/Bcap31/Ube2g2/Erlec1/Sel1l/Herpud1/Sec16a/Faf2/Syvn1/Ufd1/Edem2
GO:0098930	axonal transport	66	0.416664	1.40348	0.026158	0.026158	0.109638	3932	tags=35%, list=22%, signal=27%	Mgarp/Nefl/Hspb1/Hif1a/Dtnbp1/Map6/Kif5b/Cnih2/Bloc1s4/Actr10/Map1a/Tmem108/Bloc1s2/Kif5c/Hsbp1/Dst/Ap3s2/Pafah1b1/Rab21/Uchl1/Trim46/Ndel1/Ap3m1
GO:0045823	positive regulation of heart contraction	34	0.517082	1.56377	0.0262428	0.0262428	0.109805	1045	tags=18%, list=6%, signal=17%	Adm2/Rgs4/Ccn2/Tpm1/Ada/Avpr1a
GO:1900038	negative regulation of cellular response to hypoxia	17	0.633474	1.61156	0.0262434	0.0262434	0.109805	459	tags=29%, list=3%, signal=29%	Eno1/Eno1b/Ddah1/Hyou1/Nol3
GO:0032615	interleukin-12 production	57	-0.556283	-1.5148	0.0262912	0.0262912	0.10991	2486	tags=37%, list=14%, signal=32%	Ccr7/Cmklr1/Arrb2/Tlr2/Acp5/Unc93b1/Plcg2/Irf1/Plcb1/Tlr4/Tlr3/Syk/Tnfsf9/Defb25/Laptm5/Il10/Il23a/Il16/Irf8/Nod2/Cd36
GO:0051924	regulation of calcium ion transport	229	-0.431219	-1.35783	0.0264187	0.0264187	0.110348	2028	tags=21%, list=11%, signal=19%	Arrb2/Stc1/Egf/Lyn/Gja1/Ubash3b/Cxcl12/Bmp4/P2ry12/Agtr1a/Atp1b1/Plcg2/Pml/Ank2/Dmd/Zfas1/Epb41/Gjc2/Cav1/P2rx7/Ptpn6/Best1/Cxcl9/Cxcl10/Mrln/Ednra/Rem1/Slc8b1/Plp1/Ahr/Coro1a/Rapgef3/Il16/Ace/Cxcr4/Adcyap1r1/Cd84/Nos3/Chd7/Clec4b1/Cracr2b/Casq2/Atp1a2/Trpc3/Pln/Pdgfb/Tspan13/Aplnr/Gimap5
GO:0030336	negative regulation of cell migration	280	-0.409854	-1.29873	0.0265111	0.0265111	0.110639	2053	tags=21%, list=12%, signal=19%	Reck/Cygb/Stc1/Arhgdib/Ptn/Notch1/Nr2f2/Cxcl12/Padi2/Tet1/Patz1/Ptprk/Srgap3/Atp2b4/Pik3r2/Limch1/Il33/Emilin2/Ptprg/Tgfbr3/Plcb1/Lrch1/Nbl1/Cd200/Jup/Flcn/Cav1/Gadd45a/Dcn/Trp53inp1/Scai/Sp100/Meox2/Mitf/Sema6d/Ogt/Mctp1/Gm266/Igfbp5/Cx3cr1/Fignl2/Mmrn2/Cd74/Angpt2/Card10/Ifitm1/Atp1b2/Apod/Cd300a/Egfl7/Ripor2/Ngfr/Adgrg1/Dach1/Pdgfb/Dll4/Ptprr/Cldn5/Tie1
GO:0002396	MHC protein complex assembly	21	-0.692048	-1.57197	0.0266121	0.0266121	0.110869	2842	tags=67%, list=16%, signal=56%	Tapbp/H2-Oa/Tapbpl/H2-Q7/H2-D1/B2m/H2-DMb1/H2-DMa/H2-Ab1/H2-Q6/H2-Q4/H2-Eb1/H2-Aa/H2-DMb2
GO:0002501	peptide antigen assembly with MHC protein complex	21	-0.692048	-1.57197	0.0266121	0.0266121	0.110869	2842	tags=67%, list=16%, signal=56%	Tapbp/H2-Oa/Tapbpl/H2-Q7/H2-D1/B2m/H2-DMb1/H2-DMa/H2-Ab1/H2-Q6/H2-Q4/H2-Eb1/H2-Aa/H2-DMb2
GO:0034471	ncRNA 5'-end processing	17	0.632681	1.60954	0.0266567	0.0266567	0.110959	4485	tags=76%, list=25%, signal=57%	Pop1/Pop7/Tbl3/Pop5/Rpp25l/Rpp30/Ssb/Rpp14/Rpp40/Hsd17b10/Abt1/Trmt10c/Pop4
GO:0002637	regulation of immunoglobulin production	83	-0.523072	-1.48854	0.0267407	0.0267407	0.111213	2396	tags=25%, list=13%, signal=22%	H2-Q7/Shld1/H2-D1/Cd86/Xcl1/Pkn1/Tnfsf13/Il33/Mzb1/Cd37/H2-Q6/H2-T23/Il10/H2-Q4/Lilrb4a/Cd22/Ptprc/Fcgr2b/Sash3/Cd28/Ighm
GO:0042270	protection from natural killer cell mediated cytotoxicity	15	-0.742891	-1.58177	0.0267874	0.0267874	0.111311	2692	tags=67%, list=15%, signal=57%	H2-T22/Serpinb9/Tap2/H2-Q7/H2-D1/Clec2d/Tap1/H2-Q6/H2-T23/H2-Q4
GO:0003203	endocardial cushion morphogenesis	34	-0.626081	-1.56255	0.0269632	0.0269632	0.111946	1329	tags=26%, list=7%, signal=25%	Notch1/Snai2/Bmp5/Tmem100/Robo2/Tbx2/Nos3/Bmp7/Aplnr
GO:0055078	sodium ion homeostasis	36	-0.61351	-1.55447	0.0270071	0.0270071	0.111957	839	tags=25%, list=5%, signal=24%	Mllt6/Atp1b1/Ednra/Nr3c2/Atp1b2/Ednrb/Atp1a2/Tesc/Agtr2
[truncated: 369 more rows]

## Sheet: KEGG
ID	Description	setSize	enrichmentScore	NES	pvalue	p.adjust	qvalue	rank	leading_edge	core_enrichment
[truncated: 102 more rows]
