# Supplementary material for: Single-Cell Transcriptomics Highlights Macrophage-Driven Regulation of EndMT and Repair in Injured Muscle
Source: Research Square preprint supplement (doi:10.21203/rs.3.rs-6288736/v1), 2025-04-24
Supplement: Supplementary file 6 [file d86c6634eea46dd5633eadc7.xlsx]

## Sheet: Sheet1
gene	baseMean	log2FoldChange	lfcSE	pvalue	padj
Ifnb1	381.133	2.94363	0.292927	3.34695e-25	4.07257e-21
Calhm6	288.386	-1.82678	0.210434	2.09727e-19	1.27598e-15
Ighm	533.354	-1.50715	0.190188	1.09095e-16	4.42489e-13
Pgk1	987.279	1.25773	0.162573	6.36343e-16	1.93576e-12
Cxcl10	2058.74	1.77964	0.232565	9.69186e-16	2.22608e-12
Ms4a4c	213.601	-1.5855	0.206788	1.09767e-15	2.22608e-12
Selenop	19130.1	-1.19116	0.158909	3.72662e-15	6.47793e-12
Ciita	93.8739	-2.11878	0.285091	5.7022e-15	8.67305e-12
Slc16a3	138.105	1.68272	0.229644	1.39288e-14	1.88318e-11
Cd38	224.758	-1.53173	0.215347	5.64405e-14	6.86769e-11
Zc3h12c	123.535	1.76295	0.254671	1.98334e-13	2.19393e-10
Plk2	1299.92	0.976799	0.143812	7.28632e-13	7.38833e-10
Ly6a	128.335	-2.04772	0.309052	1.04113e-12	9.74495e-10
H2-Ab1	10497.9	-1.56186	0.23363	1.21019e-12	1.05183e-09
Apoe	183333	-1.12213	0.170699	2.52787e-12	1.92244e-09
Cdh5	42.3329	-3.90773	0.591171	2.48997e-12	1.92244e-09
Irf7	498.51	-1.53312	0.237078	5.05622e-12	3.61906e-09
Tpi1	1077.63	1.00048	0.154816	6.21158e-12	4.19903e-09
Pkm	2282.78	1.04218	0.161604	7.24697e-12	4.64111e-09
S100a4	1870.87	1.46674	0.230678	1.09885e-11	6.68541e-09
Igf2	85.3832	-2.12165	0.336145	1.66502e-11	9.64762e-09
Aldoa	2550.48	1.00325	0.159203	1.84137e-11	1.01845e-08
H2-DMa	1241.93	-1.11001	0.177762	2.47812e-11	1.31103e-08
Dlk1	31.7733	-4.25629	0.658543	2.87347e-11	1.45685e-08
Mif	1803.07	0.874594	0.14182	4.70504e-11	2.29004e-08
Fdps	148.701	1.52758	0.254492	1.09059e-10	5.10396e-08
Ifi213	48.1602	-2.50957	0.419031	1.48431e-10	6.6893e-08
H2-Eb1	10804.4	-1.39083	0.236068	1.93852e-10	8.42426e-08
Sparcl1	95.3605	-1.95608	0.339733	3.62701e-10	1.52184e-07
Mndal	459.795	-1.05406	0.182765	4.63896e-10	1.82087e-07
Plxna4os1	163.662	-1.43519	0.249191	4.58363e-10	1.82087e-07
H2-DMb1	892.523	-1.40354	0.244354	4.8854e-10	1.85767e-07
H2-Aa	12450.1	-1.44311	0.254788	7.31038e-10	2.69554e-07
Cd34	47.1489	-2.318	0.407444	8.42836e-10	3.01636e-07
Aqp1	28.503	-3.59258	0.633842	1.16104e-09	3.96643e-07
Clec3b	47.3738	-2.28204	0.406935	1.1735e-09	3.96643e-07
Ifitm3	3298.27	-1.08246	0.193841	1.29457e-09	4.25739e-07
Abcg1	770.99	-0.907882	0.162177	1.38437e-09	4.4329e-07
Nfil3	489.071	-1.13761	0.204521	1.52273e-09	4.75091e-07
AW112010	394.403	-1.22545	0.221964	1.68332e-09	5.12067e-07
Clec4d	973.779	0.906252	0.164041	2.09727e-09	6.05601e-07
Ldha	1700.02	0.799358	0.144293	2.14011e-09	6.05601e-07
Plec	621.684	0.986944	0.17864	2.07941e-09	6.05601e-07
Fcgr4	376.301	-1.04758	0.19044	2.36137e-09	6.53027e-07
Slfn5	555.329	-0.975766	0.179058	2.86193e-09	7.73866e-07
Zbp1	192.885	-1.25921	0.232618	3.21427e-09	8.45047e-07
Midn	364.941	-1.00009	0.184362	3.31528e-09	8.45047e-07
Gm16133	54.8027	1.91557	0.352047	3.33352e-09	8.45047e-07
Itih5	35.9939	-2.89031	0.534962	3.61039e-09	8.96556e-07
Pgam1	1587.14	0.904174	0.169074	5.8321e-09	1.4193e-06
Oasl1	239.627	1.18812	0.224369	6.10368e-09	1.44798e-06
Baiap2	435.337	0.910014	0.170582	6.18795e-09	1.44798e-06
Cpd	605.04	1.05095	0.198548	7.40732e-09	1.68887e-06
Rnase6	41.2691	-2.27578	0.429259	7.49499e-09	1.68887e-06
Ly6c1	39.913	-2.63113	0.512285	7.68295e-09	1.69975e-06
S100a10	1915.12	1.00596	0.190831	8.14028e-09	1.76877e-06
Cxcl1	4136.39	0.9862	0.187439	8.73636e-09	1.86498e-06
Ifi206	44.0845	-2.24498	0.429996	9.62378e-09	2.019e-06
Hpgd	434.712	-1.11806	0.215003	1.03886e-08	2.14251e-06
H2-T23	1106.71	-1.10927	0.214592	1.28056e-08	2.59698e-06
Ccr2	475.265	-0.991425	0.196095	2.40836e-08	4.76612e-06
Abca8a	34.0009	-2.5805	0.505155	2.4285e-08	4.76612e-06
Igfbp7	429.244	-1.06554	0.215108	3.82176e-08	7.38145e-06
Apoc1	69.5665	-1.84781	0.380825	5.21445e-08	9.91398e-06
Tnf	2303.19	0.989813	0.203312	6.55896e-08	1.22784e-05
Fcgr1	835.091	-0.890119	0.182542	6.67452e-08	1.22817e-05
Nrep	96.5988	-1.82778	0.377574	6.76259e-08	1.22817e-05
Oas3	64.7543	-1.56737	0.322906	6.94445e-08	1.24265e-05
Col4a1	205.025	-1.46813	0.306605	7.2353e-08	1.27593e-05
Rtp4	224.6	-1.12545	0.233596	7.64179e-08	1.32836e-05
Egfl7	41.9406	-2.26648	0.476211	8.12516e-08	1.39249e-05
Col4a2	102.9	-1.4833	0.314086	1.0157e-07	1.71654e-05
Matn4	69.2138	1.62389	0.345157	1.15516e-07	1.92547e-05
Axl	458.075	-1.09672	0.231538	1.24046e-07	2.03972e-05
Sp100	331.172	-0.919777	0.194341	1.27155e-07	2.06297e-05
Ly86	2654.49	-0.820839	0.173373	1.42813e-07	2.28651e-05
Hp	24.9275	2.40993	0.522489	1.5086e-07	2.38398e-05
Ckm	61.2418	-1.60782	0.349212	2.13609e-07	3.3323e-05
Btg2	1110.95	-0.853563	0.184164	2.17679e-07	3.35281e-05
Tspan13	200.009	-1.03456	0.22446	2.50048e-07	3.80323e-05
H2-Q7	389.142	-1.04601	0.228715	2.56627e-07	3.8551e-05
Il18bp	365.824	-1.05063	0.230743	2.96452e-07	4.37892e-05
Xaf1	155.759	-1.1753	0.259585	2.98693e-07	4.37892e-05
Thbs1	1053.21	-0.789735	0.172107	3.0285e-07	4.38699e-05
Hmcn2	29.187	-2.26847	0.503427	3.35421e-07	4.80165e-05
Map3k8	479.736	-0.869149	0.192823	3.86632e-07	5.47039e-05
Cavin2	43.0574	-2.0178	0.45443	4.48342e-07	6.2706e-05
Stk17b	467.45	-0.765713	0.170428	4.76246e-07	6.58519e-05
Trf	2511.17	-0.812356	0.182729	5.5955e-07	7.65012e-05
Ifit2	93.7336	-1.35787	0.310727	5.80163e-07	7.84381e-05
Ifi44	32.6189	-2.10911	0.482921	6.13007e-07	8.10768e-05
Irgm1	124.513	-1.05642	0.240337	6.08402e-07	8.10768e-05
Fam162a	271.988	0.843123	0.191281	6.52448e-07	8.53655e-05
Clec4b1	157.231	-1.21757	0.279978	6.73236e-07	8.71483e-05
Tmem86a	965.044	-0.90727	0.207608	7.30479e-07	9.35629e-05
Ramp2	38.6052	-1.99598	0.472505	8.04719e-07	0.000101998
Ifi47	113.494	-1.18211	0.276006	8.43286e-07	0.000105785
Oasl2	208.042	-0.920672	0.213224	8.81108e-07	0.000109401
AB124611	506.068	-0.957294	0.22193	9.02166e-07	0.000110884
Thbd	45.7823	-1.58282	0.371459	9.6914e-07	0.000117925
Clec2i	38.4721	-1.74999	0.410076	1.0219e-06	0.000121906
Il16	86.2924	-1.29749	0.305613	1.01861e-06	0.000121906
Ifi203	471.366	-0.889999	0.207299	1.04153e-06	0.000123042
Ppp1r15a	3387.44	0.752043	0.173667	1.05237e-06	0.000123127
Irf8	1272.01	-0.708003	0.164726	1.06525e-06	0.000123448
Cd300a	1097.83	-0.831061	0.193385	1.10047e-06	0.000126326
Cenpa	299.587	-0.860914	0.202121	1.18078e-06	0.000134277
Rapgef5	36.3811	1.67161	0.397239	1.20552e-06	0.000134922
Alcam	330.656	0.79675	0.185805	1.20862e-06	0.000134922
Vim	15982.3	0.705571	0.164446	1.38272e-06	0.000151576
Ly6e	3276.12	-0.954574	0.22658	1.37878e-06	0.000151576
Sqle	35.72	1.84534	0.436564	1.54602e-06	0.000167964
Rnd3	448.532	0.988599	0.236766	1.59802e-06	0.000171345
Fbxo32	388.985	-0.816685	0.19419	1.6053e-06	0.000171345
Bbc3	149.939	1.00685	0.241533	1.66655e-06	0.000176336
Rnf213	365.726	-0.790969	0.188744	1.73032e-06	0.000181505
Irf1	323.442	-0.797396	0.190291	1.79702e-06	0.000185371
Ccl2	3658.41	1.00533	0.242185	1.79765e-06	0.000185371
Nupr1	353.128	0.776017	0.185263	1.8391e-06	0.000188052
C1s1	61.8347	-1.5861	0.385142	1.8672e-06	0.000189334
Slc40a1	168.056	-0.937282	0.227632	2.28387e-06	0.00022967
Bnip3	208.11	1.12606	0.276689	2.32191e-06	0.000231582
Abl2	313.8	0.78974	0.190833	2.35548e-06	0.000232369
Phf11b	121.298	-1.14989	0.283625	2.368e-06	0.000232369
Batf	112.434	-1.05901	0.263614	3.17488e-06	0.000309056
Lum	227.093	-1.2417	0.311549	3.32685e-06	0.000321279
Batf3	135.502	-1.04153	0.260111	3.47961e-06	0.000333385
Irf2bp2	1122.96	-0.627694	0.153364	3.53143e-06	0.000335707
Themis2	176.795	-1.12465	0.284915	3.57046e-06	0.000336786
Ifih1	288.234	0.850132	0.214007	4.12187e-06	0.000385807
Clec4a3	922.168	-0.755965	0.189471	4.26715e-06	0.000396356
Edn1	84.0155	1.33285	0.340818	4.56556e-06	0.000420861
Cdk5r1	62.9895	1.56516	0.396931	4.63675e-06	0.00042421
Cyp27a1	184.028	-1.05238	0.269519	4.71065e-06	0.000424586
Emcn	15.8744	-3.08681	0.77964	4.6937e-06	0.000424586
Zranb3	90.8593	1.16998	0.297767	4.94529e-06	0.000439407
Adamts4	25.0662	-2.25348	0.578018	4.9473e-06	0.000439407
Ifi209	114.983	-1.14757	0.297467	5.00934e-06	0.000441693
A630072M18Rik	59.9709	1.26718	0.325305	5.1011e-06	0.000446548
Mtmr10	311.91	0.721574	0.181794	5.18179e-06	0.000450372
Dbi	1996.37	0.599796	0.149909	5.56407e-06	0.00046629
Gapdh	5529.39	0.696951	0.175858	5.53025e-06	0.00046629
Itgam	670.687	0.640154	0.161001	5.59487e-06	0.00046629
Gas1	101.494	-1.40212	0.364415	5.43832e-06	0.00046629
Aopep	508.097	0.7961	0.202391	5.5929e-06	0.00046629
Samd4	101.537	-1.00948	0.259902	5.52306e-06	0.00046629
Hsp90b1	3109.5	0.550821	0.141341	5.99029e-06	0.000495849
Cxcl12	95.38	-1.24684	0.327058	6.57087e-06	0.000540232
Esam	16.0221	-3.06849	0.799638	6.73506e-06	0.000550014
Neurl3	537.32	-0.696166	0.178424	6.84284e-06	0.000555091
Slco2b1	186.054	-0.915866	0.239707	6.92953e-06	0.000558401
Map4k2	64.8779	1.16402	0.30737	7.0064e-06	0.000560881
Cxcl9	70.4644	-1.43708	0.379857	7.16097e-06	0.000569507
Usp18	48.5472	-1.37555	0.363225	7.62235e-06	0.000598379
Pfkl	157.155	0.951542	0.250503	7.60886e-06	0.000598379
Ccr5	376.778	-0.798424	0.20981	8.28563e-06	0.000646279
Rcan1	343.482	0.869781	0.229275	8.37625e-06	0.000649186
Cxcr4	914.496	-0.794999	0.208521	8.73308e-06	0.000672558
Cav1	92.1751	-1.48845	0.402129	9.00448e-06	0.000689097
Slc46a3	94.0012	-1.09368	0.293434	9.13524e-06	0.000694735
Tifab	148.864	-0.980495	0.261701	9.39167e-06	0.0007085
Tslp	114.07	-1.42495	0.391098	9.43269e-06	0.0007085
Lmna	2566.86	0.567917	0.146178	9.59302e-06	0.000716122
Abcd2	90.4106	-1.18467	0.318259	9.81057e-06	0.000727896
Gdf15	3770.82	-0.742711	0.196945	1.0696e-05	0.000788783
Hes1	236.27	-0.759712	0.202048	1.08266e-05	0.000793605
Stat1	407.562	-0.821518	0.220742	1.14353e-05	0.000833201
Serinc3	3097.16	-0.633581	0.167685	1.23112e-05	0.000891685
Plagl1	95.0367	-1.28058	0.352488	1.29687e-05	0.000933744
Lbh	220.818	-0.803886	0.217956	1.36382e-05	0.000976175
Gm21188	320.293	-0.818521	0.223056	1.39098e-05	0.00098979
Ifi211	204.698	-1.08613	0.300433	1.40342e-05	0.000991259
Dhcr24	21.6046	1.89452	0.518597	1.41748e-05	0.000991259
Scimp	83.6619	-1.11324	0.304391	1.41037e-05	0.000991259
Cpeb4	489.928	0.72339	0.194968	1.43895e-05	0.00100052
Myh11	14.4638	-3.20355	0.868297	1.47122e-05	0.00101714
Idi1	51.5034	1.27236	0.354985	1.54861e-05	0.0010646
Nfib	121.109	-1.30127	0.364834	1.62055e-05	0.00110498
Cd83	3101.47	-0.679218	0.184425	1.62551e-05	0.00110498
Txnrd1	1231.25	0.635745	0.171461	1.65825e-05	0.00112097
Ptafr	757.938	-0.649875	0.176208	1.69181e-05	0.00113734
Cyp51	88.9793	1.01525	0.281697	1.73157e-05	0.00115768
Arid5a	282.876	-0.757078	0.209182	1.81822e-05	0.00120897
Zfp36	5265.39	-0.553317	0.14898	1.89596e-05	0.0012538
Ifit3	103.617	-0.945951	0.264252	1.91134e-05	0.00125715
Ehd2	35.1637	-1.65613	0.473721	2.00246e-05	0.00131
Anxa1	1469.86	0.631933	0.173069	2.08928e-05	0.00135949
Tnxb	22.2183	-1.97752	0.566889	2.18949e-05	0.00141711
Rala	668.409	0.602556	0.165092	2.21181e-05	0.00142399
Ppp1r14b	1015.75	0.668463	0.18461	2.22541e-05	0.0014252
Slpi	28.1549	1.73187	0.503169	2.23899e-05	0.00142639
Apobr	128.393	0.85164	0.240446	2.28743e-05	0.00144966
Rasd1	21.9713	1.73657	0.504219	2.61828e-05	0.00165074
Ccdc152	477.17	-2.59425	0.78004	2.75942e-05	0.00173075
Zim1	15.2295	-2.59558	0.729862	2.80146e-05	0.00174811
Nrp2	665.45	0.59326	0.167048	3.24675e-05	0.0019918
Dhrs9	47.1145	1.25175	0.3693	3.25578e-05	0.0019918
Adam8	640.277	0.785194	0.226218	3.27384e-05	0.0019918
D10Wsu102e	145.007	0.80407	0.232818	3.2626e-05	0.0019918
Cavin1	98.7491	-1.25883	0.371531	3.24598e-05	0.0019918
Psmd1	708.872	0.668537	0.19084	3.41236e-05	0.00206575
Plau	508.194	0.700868	0.202479	3.60872e-05	0.00217381
Gm4951	32.0895	-1.64552	0.500498	3.7944e-05	0.00227439
Cd28	80.0156	-0.98724	0.29244	3.92625e-05	0.00233047
Msmo1	110.165	0.850196	0.249646	3.92395e-05	0.00233047
Slc22a4	38.9268	1.32906	0.397886	3.98794e-05	0.00235559
Id3	446.548	-0.779129	0.228332	4.04035e-05	0.00237502
Hmox1	1891.92	0.596524	0.171419	4.12614e-05	0.00239897
Slfn1	32.7469	-1.51601	0.461082	4.14024e-05	0.00239897
Odc1	1563.87	0.583036	0.167067	4.12729e-05	0.00239897
Ankrd37	29.3745	1.71273	0.515682	4.32931e-05	0.00249664
Gm5086	78.9562	-1.05106	0.318364	4.48843e-05	0.00257619
Dusp6	240.179	-0.850561	0.257539	4.95133e-05	0.00282854
Rassf4	566.312	-0.647905	0.19115	5.05021e-05	0.00287154
Adgre5	779.421	-0.624207	0.183927	5.31208e-05	0.00299247
Stat2	75.8246	-0.978043	0.299603	5.29919e-05	0.00299247
Unc93b1	3082.53	-0.624255	0.185228	5.69552e-05	0.00319369
Ifi204	687.769	-0.576998	0.169938	5.77764e-05	0.00322488
Tes	157.5	0.990516	0.303031	5.84872e-05	0.00323677
Gm21860	24.7842	-1.95083	0.608232	5.85215e-05	0.00323677
Sbno2	279.892	-0.717078	0.216557	6.11147e-05	0.0033649
St8sia4	267.441	-0.644881	0.194691	6.69571e-05	0.0036372
Samhd1	727.693	-0.615282	0.181604	6.65365e-05	0.0036372
Gm14636	294.997	0.89181	0.275674	6.69022e-05	0.0036372
Fcrls	2799.67	0.559283	0.16609	6.79333e-05	0.00367383
Eea1	445.31	0.64884	0.196729	6.91781e-05	0.0037109
Apod	73.5192	-1.43248	0.460548	6.92287e-05	0.0037109
Higd1a	444.529	0.593832	0.178407	7.02037e-05	0.00374666
Iigp1	57.3227	-1.34584	0.43917	7.06799e-05	0.0037556
Cdv3	667.306	0.568395	0.170048	7.17662e-05	0.00379675
Cyp4f18	490.205	-0.815322	0.252812	7.23087e-05	0.00380693
Qpct	89.5186	1.13729	0.356191	7.25844e-05	0.00380693
Mgst3	237.054	0.670051	0.204695	7.62369e-05	0.00398133
Arap3	72.0161	0.93747	0.296376	7.70664e-05	0.00400745
Cited2	1214.83	0.730962	0.226585	7.80619e-05	0.00404195
Aplnr	11.1753	-3.49674	1.04135	7.90326e-05	0.00407487
Eno1	734.313	0.740331	0.230655	8.09688e-05	0.00415463
H2-T22	318.882	-0.753075	0.234535	8.12625e-05	0.00415463
Amotl1	40.9505	-1.41895	0.462124	8.33056e-05	0.00424127
Cflar	1180.85	0.650665	0.200392	8.49983e-05	0.00430941
Ampd3	76.8877	0.99863	0.322354	8.79055e-05	0.00443481
Phf11d	82.0369	-1.01933	0.326117	8.82005e-05	0.00443481
Ankrd28	182.812	0.819737	0.258329	8.89984e-05	0.00445651
Bcl3	179.07	-0.722429	0.226611	8.98784e-05	0.00446508
Gm4070	24.6566	-1.87803	0.621711	9.02704e-05	0.00446508
Gpx3	389.736	-0.596452	0.183005	9.00816e-05	0.00446508
Gadd45a	252.416	0.711143	0.221873	9.22884e-05	0.00454642
Ndrg1	195.953	0.971637	0.311181	9.41927e-05	0.00462152
Gm36486	61.4734	-1.09274	0.354155	9.46962e-05	0.00462756
Hsph1	147.459	0.984491	0.316158	9.70066e-05	0.0047215
Clec4a1	675.566	-0.611454	0.190507	9.90193e-05	0.00478122
Tjp2	72.0671	0.960144	0.309332	9.90109e-05	0.00478122
G530011O06Rik	26.8389	-1.95059	0.644596	0.00010311	0.00495905
Akr1b8	93.8325	0.839286	0.270786	0.000108275	0.00516664
Gm38843	63.2051	-1.19128	0.399818	0.000107889	0.00516664
Cd22	161.372	-0.813812	0.262986	0.000109514	0.00518994
Ddx60	194.358	-0.972939	0.322865	0.000109617	0.00518994
Lgals3bp	1523.22	-0.770367	0.248274	0.000111235	0.00524613
Ch25h	50.5268	1.26666	0.430393	0.000112655	0.00529261
Tmcc3	274.63	-0.686022	0.218411	0.000114349	0.00535152
Esd	1561.87	0.501286	0.153652	0.000115469	0.00538324
Bst2	3384.13	-0.545297	0.169823	0.000117809	0.00547137
Gng11	192.146	-0.819065	0.265024	0.000118366	0.00547636
Mdm2	732.951	0.551481	0.173825	0.000120161	0.00553832
Pdlim5	272.348	0.687586	0.220298	0.000121213	0.00556575
Mrpl41	248.022	0.609093	0.193366	0.0001249	0.00569564
Srxn1	274.415	0.645975	0.207248	0.000127319	0.00569564
Gpr146	148.74	-0.75673	0.245958	0.000126026	0.00569564
Gimap4	8.49325	-4.43243	1.43199	0.000127274	0.00569564
Trim30a	340.707	-0.636837	0.204514	0.000127206	0.00569564
Adgre4	34.5449	-1.33349	0.454982	0.000125919	0.00569564
AC149090.1	364.635	-0.629643	0.20159	0.00012599	0.00569564
Hyou1	187.983	0.654709	0.21024	0.000127811	0.00569673
Trim30d	84.5051	-0.853441	0.283516	0.000134718	0.00598265
Fosl2	648.48	-0.58557	0.18642	0.000137178	0.00604778
Cldn5	10.5323	-3.37814	1.06508	0.00013696	0.00604778
Epsti1	658.315	-0.674849	0.219639	0.000139006	0.00610624
Timm13	1384.25	0.521296	0.163967	0.000143602	0.00628545
Gm26917	626.769	0.810242	0.270694	0.000152105	0.00663376
Ltbp4	43.9545	-1.34213	0.459465	0.00015272	0.00663677
Cpq	262.736	-0.679305	0.223885	0.000154697	0.00669877
Tnip1	272.255	0.697456	0.230364	0.000157877	0.00681222
Ptprb	12.3715	-2.7964	0.956862	0.000160184	0.00688735
H2-Q4	185.48	-0.931901	0.322134	0.000168377	0.0072141
Hbb-bs	65.6637	-0.0655032	0.203622	0.000172427	0.00736171
Tinagl1	11.7907	-2.50667	0.86044	0.000174277	0.00741468
Rhoh	139.73	-0.771564	0.259161	0.000175268	0.00743089
Nid1	145.268	-1.01086	0.350206	0.000179721	0.00759323
Ecrg4	84.5105	0.990052	0.3408	0.000181055	0.00762309
Rnf128	98.1873	1.00675	0.345507	0.000184055	0.0077227
H2-M3	286.632	-0.706597	0.238519	0.000185693	0.00776466
Fos	7833.87	-0.529755	0.173412	0.000193374	0.00805815
Pltp	4950.47	-0.640874	0.214815	0.000196285	0.00815153
Ppfia4	240.39	-0.733255	0.249126	0.000198845	0.00822975
Podxl	11.7399	-2.65773	0.936828	0.000200487	0.0082696
Naa50	750.26	0.506663	0.164183	0.000203295	0.00835706
Nav2	118.305	0.776122	0.26499	0.000204922	0.00839559
Mt1	6145.32	-0.689785	0.235249	0.000207781	0.00848417
Itga5	307.08	0.599908	0.199846	0.000211114	0.00859144
Myo1e	431.98	0.610462	0.204706	0.00021592	0.00875772
P4ha1	312.866	0.635388	0.214618	0.000217158	0.00877865
Gpr35	89.9438	-0.894355	0.313236	0.000221015	0.008905
Pecam1	38.3249	-1.29585	0.471776	0.000223754	0.00898562
Fam129b	514.361	0.533179	0.176383	0.000232762	0.00918121
9130230L23Rik	101.082	0.828838	0.289812	0.00022957	0.00918121
Apoc4	31.4289	-1.5041	0.548197	0.000231857	0.00918121
Mki67	224.678	0.654979	0.223564	0.000230864	0.00918121
Jdp2	201.603	-0.740273	0.258007	0.000233152	0.00918121
Rgcc	523.114	0.634043	0.215023	0.000233112	0.00918121
Fbln7	14.8359	-2.2789	0.824533	0.000237971	0.00934076
Arhgap19	275.257	-0.599057	0.203679	0.000240179	0.00939711
Hspa5	6546.88	0.572196	0.191978	0.000242163	0.00944437
Tmem229b	45.521	-1.06075	0.382398	0.000244694	0.00945217
Gspt1	448.373	0.511293	0.169212	0.000243442	0.00945217
Lst1	3058.8	-0.690863	0.240024	0.00024405	0.00945217
Egln1	208.338	0.62815	0.214878	0.000245479	0.0094525
Dusp2	746.979	-0.765957	0.269359	0.000246901	0.0094765
C1qtnf9	8.99238	-3.50312	1.18218	0.00024766	0.0094765
Impact	191.11	-0.689136	0.240627	0.000249391	0.00951283
Agtr2	8.33559	-3.61427	1.16905	0.000255987	0.00973392
Ttyh3	330.356	-0.543785	0.18325	0.000259346	0.00981478
Calhm2	38.4765	-1.17049	0.422959	0.000259727	0.00981478
Pvalb	19.3843	-1.73062	0.633143	0.00026565	0.0100075
Oas1g	34.19	-1.41724	0.531247	0.000266753	0.0100153
Treml2	23.7781	-1.46402	0.53887	0.000267503	0.0100153
Parp9	111.676	-0.762673	0.27063	0.000274758	0.0102554
Lgals1	8702.44	0.4941	0.164692	0.000278472	0.0103306
H2-K1	8131.52	-0.485001	0.161703	0.000278035	0.0103306
P2ry10b	111.414	0.728611	0.259434	0.000282174	0.0104362
Gm1673	198.015	-0.749503	0.266779	0.000285447	0.0105252
Marcks	4265.52	-0.4248	0.139179	0.000290575	0.0106819
Avpi1	164.732	0.652346	0.230277	0.000297444	0.0109015
Gclm	259.882	0.571991	0.197291	0.000303774	0.0111001
Cbfa2t3	87.5928	-0.831012	0.305035	0.000307612	0.0111732
Gpihbp1	35.1935	-0.111417	0.239059	0.00030705	0.0111732
Agap1	126.967	0.68767	0.243984	0.000313536	0.0113208
Abcc1	185.188	0.624276	0.21862	0.000312683	0.0113208
1700003F12Rik	59.4157	0.928534	0.346326	0.000314773	0.0113318
Sox18	8.63252	-3.52377	1.20254	0.000319626	0.0114726
Junb	10578.8	-0.476224	0.160613	0.000321888	0.0115198
Cacybp	389.119	0.522487	0.178748	0.000325846	0.0115748
Pdk1	73.1748	0.858356	0.318515	0.00032628	0.0115748
Cd74	26162.5	-1.18351	0.45244	0.000325132	0.0115748
Nme1	1140.58	0.497523	0.169159	0.000332408	0.011758
Dbp	186.56	-0.666801	0.239365	0.000334313	0.0117911
Nrros	890.422	-0.541955	0.191089	0.000335553	0.0118006
H2-Q6	63.8937	-0.949957	0.355848	0.00033656	0.0118019
Vcp	1277.7	0.477395	0.161468	0.00033777	0.0118103
Zfp691	25.5706	-1.35157	0.515794	0.000340178	0.0118604
Map2k3	689.706	0.532608	0.183983	0.000342375	0.0119029
Ass1	57.0541	0.893538	0.334071	0.00034594	0.0119926
Tbcb	835.181	0.475062	0.161452	0.000352915	0.0121996
Gpr65	1006.64	-0.707687	0.257827	0.00035408	0.0122052
Eif4ebp2	297.827	-0.542715	0.189531	0.00035578	0.0122292
Lrp8	19.1863	1.44467	0.55112	0.000356867	0.012232
Cdk18	71.2219	0.880422	0.326504	0.000358644	0.0122584
Aldoc	20.8621	1.49473	0.579421	0.000362641	0.0123603
Slc6a8	337.897	0.664404	0.23942	0.000370315	0.0125866
Hba-a2	24.5793	-0.0647171	0.203138	0.000379382	0.0128588
Myct1	10.3201	-0.194733	0.394702	0.000382606	0.0129321
Mertk	359.766	-0.575157	0.205811	0.000387666	0.0130668
Fkbp2	1085.72	0.530084	0.186426	0.000398209	0.0133851
Creld2	137.46	0.679752	0.251112	0.000402466	0.0134909
Arc	26.6372	1.49149	0.616366	0.000413738	0.0138307
Sirpb1c	110.25	-0.908869	0.346056	0.000418751	0.0139218
Sat1	4195.82	-0.415763	0.14056	0.000418037	0.0139218
Chodl	11.4645	-2.48534	0.947797	0.00042053	0.0139428
Fam214a	98.5048	-0.84492	0.321879	0.000425533	0.0140703
Csf2rb	410.702	-0.566958	0.203988	0.000440828	0.0145366
Cd109	55.0052	0.993629	0.381305	0.000443821	0.0145957
Ppa1	131.121	0.695545	0.2594	0.000460818	0.0151138
Cspg4	64.7105	1.17991	0.463337	0.000466647	0.0152639
Manf	942.496	0.559236	0.203061	0.000479415	0.0156395
Sp110	209.48	-0.633296	0.236656	0.000487678	0.0158665
Adss	299.43	0.519138	0.186653	0.000499161	0.0161968
Peg3	90.8743	-1.06414	0.423099	0.000508755	0.0164642
Prelid1	894.768	0.471933	0.167636	0.000515233	0.0165461
Otulinl	772.72	-0.4795	0.170768	0.000515726	0.0165461
Slc38a1	772.798	0.579534	0.213861	0.000516727	0.0165461
Crem	211.638	-0.651656	0.247646	0.00051428	0.0165461
Edf1	1566.04	0.437535	0.153106	0.000523945	0.0166894
Arhgef3	161.554	-0.621605	0.234289	0.000523476	0.0166894
Bcl6b	6.93259	-3.90849	1.51994	0.000526093	0.0167141
Hba-a1	27.97	-0.0589526	0.200139	0.000547995	0.0173195
Dtx3l	193.713	-0.636037	0.242597	0.000547786	0.0173195
Ly6h	8.08304	-2.97922	1.07916	0.000550769	0.0173621
Nfia	153.129	-0.828252	0.328317	0.00055737	0.0175247
Ebf1	116.126	-0.932492	0.373808	0.000560219	0.0175689
Ints2	62.7844	0.908587	0.365776	0.000568923	0.017796
Gpr85	22.0699	1.25651	0.526297	0.000597832	0.0186046
Rab11fip1	196.878	0.733085	0.287281	0.000596604	0.0186046
C130074G19Rik	8.08013	-2.88326	1.08845	0.000603815	0.0187429
Lsm4	737.043	0.462479	0.166515	0.000608924	0.018769
Gm45716	127.356	0.742094	0.293289	0.000606603	0.018769
Tep1	510.101	-0.498155	0.182919	0.000609284	0.018769
Arhgap15	176.82	-0.655399	0.256263	0.000616856	0.0189543
Rnaset2b	295.204	-0.819814	0.33189	0.000630781	0.0193334
Luzp1	200.762	0.578004	0.219017	0.000641517	0.019613
Ltbp2	53.3504	0.978253	0.401129	0.000658443	0.02008
Hpcal1	395.363	-0.594174	0.228653	0.000668722	0.0203425
Ctdsp2	424.675	-0.486548	0.179959	0.00067496	0.0204811
Fcgr2b	2022.09	-0.520597	0.196324	0.000682319	0.0205747
Tuba1a	422.569	0.627641	0.243705	0.000683118	0.0205747
Spire1	114.501	0.643551	0.252943	0.000682848	0.0205747
Sirpb1b	38.0112	-1.09267	0.454228	0.000700415	0.0210436
Laptm4a	1549.26	-0.407405	0.145638	0.000705304	0.0211383
Notch3	23.2702	-1.50096	0.650472	0.000708828	0.0211917
Steap4	24.5998	-1.30881	0.566709	0.000716026	0.0213544
Atp2b4	84.5123	0.824703	0.335244	0.000723132	0.0214611
Vav2	154.149	-0.608922	0.237588	0.00072239	0.0214611
Dusp4	39.6648	1.13221	0.485004	0.00072685	0.021519
Col15a1	75.4868	-0.876241	0.361828	0.000733522	0.0215756
Areg	103.251	0.736435	0.298335	0.00073362	0.0215756
Sft2d1	367.499	-0.683879	0.276163	0.000734082	0.0215756
Klf3	178.108	-0.595047	0.232571	0.000739287	0.0216762
Gm8251	10.7338	1.75812	0.768425	0.00074623	0.0218272
Cd300lb	125.676	-0.638326	0.254586	0.000764	0.0222452
Ifit1	138.053	0.760285	0.312862	0.000764177	0.0222452
Stx16	198.236	-0.56665	0.220197	0.000768958	0.022331
Tnrc6b	259.687	-0.549873	0.213802	0.000779519	0.0225838
Rnf144b	80.0442	-0.805918	0.33944	0.00078304	0.0226319
Svil	153.046	-0.592111	0.234078	0.000796152	0.0229564
Actc1	29.4233	-1.17331	0.500406	0.00080066	0.0230318
Rexo2	553.578	0.466997	0.174651	0.000805031	0.0231029
Ccn5	6.91862	2.43835	1.02316	0.000809462	0.023121
Gm5150	76.5407	-0.797697	0.330423	0.00080848	0.023121
Ly96	247.866	-0.550949	0.216013	0.000822946	0.0234164
Lfng	178.095	-0.64153	0.259652	0.000823654	0.0234164
Slamf7	457.259	-0.516628	0.200057	0.000850246	0.0240645
Trafd1	415.39	-0.473858	0.179642	0.000850407	0.0240645
Plac8	103.178	-0.912011	0.389788	0.000863955	0.0243912
Msr1	544.459	0.475922	0.181347	0.000882481	0.0248566
Pdgfra	48.7969	-1.09589	0.487344	0.000884973	0.0248692
Fnip2	615.794	0.510342	0.197535	0.000889464	0.0249378
Mylip	302.77	-0.503032	0.195259	0.000897885	0.025116
BE692007	13.8559	-1.70108	0.775428	0.000906278	0.0252926
Rccd1	29.6677	1.03266	0.458834	0.000920046	0.0256181
Slc13a3	55.4692	0.844508	0.372219	0.000928874	0.0257484
Hacd4	802.601	-0.445506	0.168606	0.000928955	0.0257484
Cebpb	4087.87	-0.440312	0.166315	0.000933257	0.0258088
Adssl1	316.008	0.491326	0.190886	0.00096976	0.0267574
Cpxm2	24.1212	1.2579	0.567588	0.000977677	0.0269149
Ndufab1	815.744	0.430162	0.162188	0.000981771	0.0269666
Rps27	11784.9	-0.533947	0.213555	0.00099049	0.0271448
Ypel3	1022.07	-0.495612	0.194238	0.000995513	0.0271601
Tap1	235.851	-0.558528	0.225797	0.000995439	0.0271601
Anxa2	1672.3	0.476638	0.184414	0.000998072	0.027169
Fgl2	292.005	-0.642759	0.270598	0.00100853	0.0273314
Psmb5	728.904	0.42619	0.16091	0.00100763	0.0273314
Stx11	95.5264	0.799856	0.344221	0.00101645	0.0274847
Notch1	147.647	-0.572827	0.232978	0.00103078	0.0277488
Ccnf	33.0261	1.0474	0.472501	0.00103007	0.0277488
Tnfsf9	327.572	0.542973	0.218816	0.00105369	0.0283032
Tgfbi	2163.19	0.506762	0.201218	0.00105806	0.0283579
Cxcl2	38148.8	0.503395	0.200362	0.00107215	0.0286724
Sdc3	1117.55	-0.436734	0.168197	0.0010871	0.0290083
Txn1	2627.83	0.462297	0.180368	0.00109298	0.0290381
Prdx1	5812.74	0.428951	0.164087	0.00109177	0.0290381
H2-D1	14076.8	-0.516177	0.209539	0.00110366	0.0292577
Ap2s1	1321.19	0.411705	0.154595	0.00111996	0.0296255
March1	150.937	-0.666527	0.289615	0.00112828	0.0297808
Mmp2	230.2	-0.72638	0.316527	0.00113149	0.0298007
Csf3r	240.279	-0.538052	0.220617	0.0011448	0.0299679
Tmem140	175.69	-0.593721	0.2498	0.00114729	0.0299679
Pira2	114.91	0.620159	0.261847	0.00114466	0.0299679
Ehd1	918.467	0.569033	0.23581	0.00114768	0.0299679
Scoc	275.66	0.500626	0.200307	0.00115245	0.0300223
Dtx3	103.29	-0.642035	0.271243	0.0011547	0.0300223
Galnt6	182.495	0.528471	0.215477	0.00116507	0.0302273
Flt1	21.0339	-1.4849	0.743569	0.00116809	0.0302411
Phyhd1	178.601	0.607956	0.260065	0.00119468	0.0307984
Gm35853	7.79941	-2.56757	1.14565	0.00119445	0.0307984
Ptges3l	28.393	1.06682	0.494286	0.00120981	0.0311224
Cpne9	15.9649	1.50467	0.763192	0.00122128	0.0312808
Dnajc21	185.507	0.556517	0.232363	0.00122367	0.0312808
Sec11c	1067.84	0.424899	0.164712	0.00122294	0.0312808
Spn	37.2333	0.925045	0.435621	0.00123706	0.031425
Gm46224	108.918	-0.675779	0.297549	0.00123303	0.031425
Cebpd	214.736	-0.549108	0.22958	0.00123563	0.031425
Spry4	7.34796	-2.68452	1.14542	0.00124043	0.0314449
Snx5	2211.85	-0.398225	0.15257	0.00124337	0.031454
Entpd2	26.8754	-1.18657	0.559615	0.00124673	0.0314734
M6pr	1295.51	0.395319	0.151236	0.00125774	0.0316857
Evl	439.537	-0.437532	0.172339	0.0012774	0.0321145
Cass4	66.6453	0.760559	0.350667	0.00128741	0.032234
Zfp131	261.647	0.485418	0.197179	0.00128745	0.032234
Kcnn4	264.535	0.638915	0.277729	0.00129848	0.0324433
Atp1a2	12.471	-1.7993	0.85708	0.00130345	0.0325009
Utp18	132.262	0.617241	0.269623	0.001312	0.0326471
Mex3c	163.09	0.593475	0.255235	0.00131748	0.0327165
Srebf2	181.609	0.55543	0.233422	0.00133541	0.0330942
Ppfibp1	134.668	0.709156	0.315423	0.00134649	0.033301
Adgrl4	6.95779	-0.150352	0.289098	0.00135293	0.0333022
Rgma	14.9949	-1.61203	0.779529	0.00135389	0.0333022
Tcf7l2	127.029	-0.578123	0.247416	0.00135475	0.0333022
AI506816	138.41	0.6067	0.261306	0.00135876	0.0333335
Gm26716	19.9082	-1.26288	0.606366	0.00137524	0.0336699
Pdgfrb	46.804	-0.98169	0.463397	0.00138023	0.0337241
Sdc4	1739.82	0.430666	0.168225	0.00138513	0.0337761
Nup107	48.5364	0.850932	0.402616	0.00140502	0.0341926
Fkbp4	191.659	0.50875	0.211526	0.00140884	0.0342172
Apobec1	882.405	-0.460629	0.187572	0.00141964	0.0344106
Rpgrip1	64.4353	-0.806372	0.37386	0.00142684	0.0345165
Dleu2	382.192	-0.506585	0.21335	0.00145212	0.0350583
Tnnc2	150.792	-0.760384	0.359537	0.00147182	0.03543
Heyl	10.6112	-1.8879	0.909679	0.00147334	0.03543
Clec12a	1352.53	-0.41734	0.165138	0.00149538	0.0358891
Lama5	9.33596	-2.01078	0.974733	0.00150945	0.0361555
Ramp1	508.232	-0.544157	0.234857	0.00155021	0.0370588
Rrs1	71.9686	0.68844	0.314583	0.00155383	0.0370725
Rap2b	749.605	0.417635	0.167348	0.00155834	0.0371075
Ube2l6	94.8602	-0.71107	0.328626	0.00157377	0.0372111
Zdhhc18	121.992	0.594759	0.264151	0.00157031	0.0372111
Sorbs2	7.30905	-0.167982	0.320572	0.00157493	0.0372111
Sik1	370.853	-0.468728	0.194935	0.00156741	0.0372111
Sertad2	231.326	0.48906	0.206185	0.001579	0.0372349
Oas2	62.9999	-0.759281	0.363317	0.00158763	0.0373101
Nlrc5	46.2638	-0.828969	0.399885	0.00158831	0.0373101
Nim1k	16.8627	1.20356	0.616177	0.00160578	0.0376476
Sgms2	85.0861	0.656303	0.298165	0.00160922	0.0376557
Otud1	56.1355	0.755026	0.355712	0.00161302	0.0376722
Ddit3	254.692	-0.475163	0.199703	0.00162431	0.0378632
Mcm5	60.2199	0.702589	0.328627	0.0016328	0.0379884
Pdia6	1213.38	0.439848	0.180105	0.00164392	0.038174
Slc2a1	104.843	0.608976	0.27375	0.00164925	0.0382249
2010109A12Rik	23.7568	1.09865	0.570884	0.0016625	0.0383783
Gusb	1513.36	0.465657	0.19438	0.00166533	0.0383783
Cacul1	245.193	0.477595	0.201449	0.00166332	0.0383783
Nr4a1	963.133	-0.484501	0.206141	0.00168638	0.0387899
Mfsd6	111.938	0.628897	0.289594	0.00169624	0.0389431
Ran	1042.62	0.431201	0.176445	0.00170109	0.0389808
Atp2a1	18.6817	-1.24827	0.658088	0.0017318	0.0396101
Myl6	6185.16	0.356531	0.139109	0.00179218	0.0409143
Tpst1	66.5506	-0.695335	0.32802	0.00180545	0.0411398
Pcna	852.979	0.405063	0.164481	0.0018094	0.0411529
Gbp2	105.871	-0.676399	0.326187	0.00183355	0.0416244
Cd48	949.082	-0.414411	0.170331	0.00184407	0.041689
Rapgef2	388.901	0.575778	0.261839	0.00184668	0.041689
Lysmd2	11.8275	-1.70698	0.883524	0.00184438	0.041689
Gbp9	30.6788	-0.935941	0.484167	0.00188952	0.042574
Zscan26	72.6915	-0.764783	0.387058	0.00189288	0.042574
Tie1	6.21107	-0.143409	0.277963	0.00189708	0.0425899
Atp1a3	173.392	-0.595753	0.275205	0.00190297	0.0426433
Lcp1	3088.48	0.367235	0.146162	0.00190908	0.0427015
Vegfa	372.829	-0.52567	0.233915	0.00192929	0.0430745
Carhsp1	168.19	0.502331	0.221273	0.00194289	0.0432987
Pik3r5	296.369	0.478889	0.207148	0.00195649	0.043522
Bicra	39.5574	-0.841182	0.427351	0.00196851	0.0437095
Mbnl1	1070.52	-0.384264	0.156398	0.00198165	0.0439211
Myl1	170.131	-0.63408	0.304889	0.00200962	0.0444602
Spon2	6.02705	-0.149102	0.286468	0.00202275	0.0446693
Tlr12	24.5289	-1.06113	0.567386	0.00207529	0.0456638
Ssbp2	47.2638	-0.778545	0.392016	0.00207237	0.0456638
Rnasel	367.138	-0.461507	0.200554	0.00210723	0.046283
Ptrh1	43.2009	0.788293	0.400907	0.00211542	0.046335
Pik3cd	238.68	-0.501028	0.225134	0.00211721	0.046335
Gm36161	133.051	-1.36169	0.825162	0.00212596	0.0464428
Tmem160	1200.16	0.384068	0.157588	0.00213925	0.0466495
Plxdc2	148.271	-0.598648	0.282504	0.00215453	0.0468987
I830077J02Rik	84.3313	-0.633375	0.308828	0.00220172	0.0475852
Card11	51.5934	-0.834808	0.428602	0.00219764	0.0475852
Icam2	23.8212	-1.15342	0.665586	0.00219763	0.0475852
Gpr34	615.094	-0.468083	0.206723	0.00219977	0.0475852
Smad7	281.122	0.525564	0.239426	0.00221995	0.0478942
Calm3	1481.67	0.391621	0.162764	0.00223818	0.0481191
Pla2g15	375.818	-0.455693	0.199769	0.00223838	0.0481191
Phlda1	1227.68	0.443496	0.19236	0.00224224	0.0481191
Lamtor2	1315.28	0.409105	0.172967	0.00226271	0.0483028
Ranbp1	664.249	0.420725	0.179344	0.00226169	0.0483028
Smoc2	103.725	-0.757501	0.38898	0.0022574	0.0483028
Lpin1	135.464	-0.601137	0.292312	0.00227407	0.0484605
Gbp8	17.2224	-1.31938	0.744811	0.0023125	0.0491933
Tollip	193.164	0.472602	0.2118	0.00234737	0.0498479
Glrx5	472.876	0.433203	0.187719	0.0023691	0.0502216
Cygb	39.8257	-0.894137	0.492311	0.00237612	0.0502828
Gm35154	59.6219	-0.834471	0.456449	0.00238121	0.0503031
Gpr84	66.895	0.768902	0.410185	0.00239386	0.0504827
Angptl1	101.582	-0.827582	0.443823	0.00243044	0.05111
Snrpa1	183.949	0.498651	0.228116	0.00243621	0.05111
Ace	16.0738	-1.28156	0.723641	0.00243582	0.05111
Nfe2l2	1253.74	-0.378563	0.15862	0.00244383	0.0511815
Notch2	298.421	-0.498207	0.231482	0.00248632	0.05183
Napsa	187.399	-0.677296	0.345569	0.0024816	0.05183
Prag1	95.3521	0.702207	0.365245	0.0024906	0.05183
Meox2	32.626	-0.994906	0.571683	0.00249183	0.05183
Pcp4l1	63.2496	0.676085	0.345694	0.00251001	0.0520304
Sirt1	139.714	0.573201	0.281234	0.00250911	0.0520304
Pdpn	358.915	0.507209	0.235005	0.00252366	0.0521356
Pilrb2	76.8713	-0.677863	0.346605	0.00252337	0.0521356
Smdt1	1968.98	0.380018	0.160073	0.00253752	0.0523331
Adam19	115.076	-0.620691	0.307795	0.00255114	0.0524362
Nup50	292.767	0.426831	0.186868	0.00254753	0.0524362
Mxd1	246.372	-0.454665	0.204891	0.00256872	0.0527087
Lrrfip2	317.428	0.423329	0.185564	0.00258648	0.0529152
Sept4	12.3366	-0.273666	0.813145	0.00258748	0.0529152
Pou2f2	365.315	-0.487385	0.226537	0.00259595	0.0529455
Adam17	663.597	0.390429	0.166369	0.00259767	0.0529455
Zmynd15	131.802	0.581119	0.288011	0.00263553	0.0536273
Rex1bd	769.235	0.394982	0.16972	0.00265276	0.0538877
Il1rn	702.134	0.480314	0.222003	0.00267395	0.0542276
Nuak2	226.23	-0.494143	0.230022	0.00269249	0.054242
Eid1	789.806	0.42128	0.185624	0.00268866	0.054242
Jup	87.022	-0.587492	0.291327	0.00268401	0.054242
Ube2a	555.265	0.3898	0.167315	0.00269233	0.054242
Rara	231.478	-0.481213	0.222274	0.00270276	0.054359
Gm15728	36.6253	0.82304	0.453381	0.00271574	0.0545299
Mcm3	148.693	0.496083	0.233706	0.00274562	0.0549485
Mmp13	88.5475	0.677717	0.356103	0.00274332	0.0549485
Dyrk3	10.5964	1.46762	0.933133	0.00276161	0.0551777
Nhp2	472.519	0.443242	0.199839	0.00277732	0.0552204
Arrdc3	79.4762	-0.669803	0.358462	0.00276924	0.0552204
Psmb9	541.265	-0.437348	0.19721	0.00277736	0.0552204
Nop56	190.755	0.536713	0.263029	0.00281083	0.0556133
Hpse	304.398	-0.488254	0.229835	0.00280678	0.0556133
Gm10802	21.6409	-1.04219	0.63181	0.00280368	0.0556133
A930007I19Rik	201.371	-0.535486	0.261077	0.00285311	0.0563582
Ebi3	151.436	-0.555213	0.276999	0.00286084	0.0564193
Hsp90aa1	2200.76	0.367178	0.156081	0.00287998	0.0567048
Pml	70.3664	-0.655707	0.352624	0.00290102	0.0570269
Mylpf	313.595	-0.591216	0.303993	0.00291523	0.057127
Cdkn1c	233.396	-0.61508	0.318371	0.0029155	0.057127
Serpine1	198.758	0.682286	0.365964	0.00296105	0.0579262
Trappc6a	325.97	0.421288	0.189521	0.00300456	0.0586829
E130102H24Rik	15.587	-1.22297	0.788772	0.00302558	0.0589989
Mylk	23.4659	-1.14635	0.731097	0.00306543	0.0596803
Pfn1	7149.32	0.318308	0.130881	0.00311035	0.0604581
Larp4	259.181	0.453075	0.211327	0.00313333	0.0608075
Nbl1	37.3578	-0.866529	0.507046	0.00315046	0.0610427
Suco	240.776	0.445016	0.206873	0.00316954	0.0613147
Cpxm1	90.1139	-0.777048	0.449838	0.0032188	0.0621688
Dock9	12.1137	-1.37092	0.900307	0.00324169	0.0625117
Csk	485.161	-0.384889	0.170529	0.0032534	0.0626382
Fmo1	5.82572	-0.121728	0.247984	0.00326408	0.0627445
Fosl1	35.9306	0.826874	0.506447	0.00332409	0.0637974
Dppa3	42.3509	-0.753792	0.438678	0.00333697	0.0639438
Stam2	187.176	0.448971	0.212489	0.00336122	0.0643071
Syne1	131.379	0.516641	0.257921	0.00337219	0.0644157
Pgd	637.054	0.393735	0.176762	0.00340291	0.0647991
Pdia4	476.434	0.415158	0.190415	0.00339865	0.0647991
Park7	1100.57	0.375272	0.16577	0.00341456	0.0649193
Ubl4a	167.785	0.472015	0.228875	0.00344995	0.0654899
Snrk	94.8315	-0.550473	0.28559	0.00347598	0.0658812
Hmgcs1	136.037	0.538402	0.274368	0.00349643	0.0661657
Srm	110.921	0.527546	0.267611	0.00350572	0.0662385
Mvd	45.7451	0.692032	0.401775	0.00353154	0.0666229
Exoc5	284.122	0.431873	0.20327	0.00354577	0.0667878
Capn2	311.166	0.428754	0.20098	0.00356592	0.0670635
Capg	2157.88	0.408035	0.187934	0.00357492	0.067129
Cdkn1a	2326.99	-0.367564	0.163153	0.00358353	0.0671871
Adamts12	20.8721	-1.06336	0.699834	0.00360396	0.0674661
Ephx1	117.32	-0.556088	0.294064	0.00362664	0.0675788
Pilrb1	35.0526	-0.814976	0.504861	0.0036232	0.0675788
Rnf122	17.8629	-1.24196	0.84274	0.00362563	0.0675788
Tmem94	63.4256	-0.627807	0.352921	0.00364691	0.0678526
N4bp1	319.237	0.398906	0.182784	0.00366526	0.0680899
Rpn1	686.232	0.386386	0.174868	0.00368516	0.0683552
Mrps28	259.751	0.439251	0.210532	0.0037001	0.0685278
Eif3b	400.423	0.409363	0.18972	0.0037068	0.0685476
Oser1	478.434	0.432182	0.206276	0.00373295	0.068822
Rapgef6	332.375	-0.402802	0.186755	0.00373124	0.068822
Col18a1	48.9632	-0.737042	0.438417	0.00377799	0.0695471
Pmp22	1359.95	0.333884	0.146243	0.00379146	0.0696895
Ly9	454.357	-0.479686	0.241792	0.0038204	0.0701155
Aprt	2228.5	0.389938	0.178954	0.00383981	0.0703657
Tgtp2	8.01682	-0.142154	0.272434	0.00387217	0.0708521
Abracl	1469.46	0.363282	0.162478	0.0038887	0.0710476
Chd3	264.795	-0.419772	0.200294	0.00390634	0.0712628
Gm19412	32.6586	0.839271	0.580977	0.00391961	0.071398
Abcc9	11.1441	-0.211732	0.418548	0.00393199	0.0715163
Rps19bp1	182.577	0.439227	0.213907	0.00399855	0.0726184
Atp6v1h	513.669	0.40459	0.190984	0.00402414	0.0728583
Adap2os	87.9637	-0.605904	0.343368	0.00402972	0.0728583
Lgals3	22038.9	0.425687	0.204637	0.00401947	0.0728583
Mthfd2	63.8715	0.606917	0.341606	0.00404244	0.0728717
Zeb1	51.715	-0.754621	0.484253	0.00404031	0.0728717
2410006H16Rik	1656.13	-0.452032	0.225022	0.00405234	0.072942
Bmf	27.4392	-0.832046	0.535387	0.00408281	0.0730583
Dynll1	2064.17	0.336678	0.147637	0.00407982	0.0730583
Lyl1	161.877	-0.559797	0.312633	0.00408079	0.0730583
Psme1	1274.05	-0.374302	0.170714	0.00406573	0.0730583
Arid5b	543.605	0.40604	0.192612	0.00408946	0.0730699
Pea15a	844.13	0.346797	0.15431	0.00413382	0.0736462
Ptprd	18.1042	-1.07731	0.776328	0.00412896	0.0736462
Ndrg2	13.8018	-1.16868	0.843988	0.00416955	0.0741742
Prss46	15.2178	1.15929	0.839783	0.00418443	0.0743302
Islr	104.385	-0.687727	0.418676	0.00424973	0.0752703
Parp14	375.425	-0.473705	0.245462	0.00424707	0.0752703
Usp12	272.27	-0.427438	0.209015	0.00425688	0.0752874
Ugp2	343.395	0.391826	0.1841	0.00429057	0.0757731
Sfr1	833.317	0.357599	0.162085	0.00430761	0.0759637
Gcc1	39.2611	-0.724218	0.460497	0.00434955	0.0765923
Stx3	125.609	0.539865	0.293503	0.00436043	0.0766731
Tspan7	14.7389	-1.15862	0.841988	0.00437414	0.0768031
Rps29	46866.3	-0.319866	0.147296	0.0043907	0.0769827
Zfas1	558.805	-0.42973	0.21366	0.00440476	0.0771181
Ifngr1	916.904	-0.379034	0.178081	0.00446212	0.0780102
Peli1	547.367	0.387534	0.18306	0.00448423	0.0782842
Ctla2b	447.856	0.376676	0.176733	0.00450742	0.0785763
BC147527	10.9315	-0.244481	0.546967	0.00451901	0.0786656
Mamdc2	31.0327	0.923866	0.662939	0.00454233	0.0789586
Marcksl1	1041.34	0.423633	0.209902	0.00455655	0.0789802
Ghr	22.0377	-0.949971	0.70615	0.00455506	0.0789802
Psmd7	455.765	0.367512	0.170831	0.00459149	0.0794726
Atox1	3706.54	0.411873	0.201929	0.00465381	0.0804369
Txnl4a	359.416	0.420949	0.208381	0.00469148	0.080973
Rars	262.219	0.401924	0.19595	0.00471925	0.0813369
Gm13710	47.9158	-0.732832	0.508992	0.00474124	0.0816003
Slfn8	84.7142	-0.560387	0.328766	0.00474807	0.0816024
Lactb	315.234	0.400494	0.195164	0.00475737	0.0816295
Crebrf	209.753	-0.446414	0.231176	0.00476306	0.0816295
Chchd6	53.663	0.591465	0.35536	0.00484898	0.0829851
Zkscan6	36.1538	-0.708507	0.468651	0.0048999	0.0837387
Tpm4	962.319	0.396635	0.193487	0.00491782	0.0839272
Peg10	16.3917	-1.04367	0.876199	0.00493559	0.0839448
Ldhb	131.91	-0.520227	0.295365	0.00493955	0.0839448
Inpp4b	92.4174	0.529523	0.304056	0.00492657	0.0839448
Ebna1bp2	199.826	0.431091	0.220504	0.00494829	0.083976
Tk2	165.868	-0.492968	0.272993	0.00496333	0.084114
Cd53	1717.37	-0.357724	0.167788	0.0049712	0.0841302
Car13	65.3472	0.560122	0.331508	0.00498591	0.0841582
Mgl2	41.2513	-0.678529	0.456039	0.00498669	0.0841582
Vma21	391.166	0.369723	0.175817	0.00499854	0.0842414
Ifi214	8.35483	-0.148016	0.279436	0.0050256	0.0842645
Pou3f1	20.679	0.833639	0.657618	0.00503454	0.0842645
Stmn1	348.527	0.431708	0.220446	0.00503444	0.0842645
Mcm2	57.0424	0.617575	0.379821	0.00503008	0.0842645
Myh9	1278.5	0.325364	0.147567	0.00502734	0.0842645
Agfg1	212.365	0.43941	0.228381	0.0050766	0.084811
Jam2	8.16674	-0.12805	0.253352	0.00508113	0.084811
Ccdc102a	20.8519	-0.878934	0.651321	0.00508816	0.084812
Map3k1	244.496	-0.424627	0.218872	0.00517199	0.0860914
Rab8b	1239.73	0.332566	0.152015	0.00519375	0.0862176
Fgd2	271.009	-0.429736	0.223275	0.00518944	0.0862176
Psmb3	834.866	0.334527	0.153439	0.0052034	0.0862601
Cd81	1212.92	0.404625	0.202416	0.00521764	0.0863785
Gpr157	152.321	-0.490904	0.271065	0.00522902	0.0864493
Hells	29.8814	0.734966	0.522193	0.00525649	0.0867855
Pik3r1	360.223	0.385679	0.188787	0.00526814	0.08686
Selplg	688.08	-0.391951	0.194226	0.00529456	0.0869423
Nme2	5039.08	0.351204	0.164907	0.00529367	0.0869423
Clic5	10.8168	-0.112185	0.23618	0.00528555	0.0869423
Gm15417	104.373	-0.511223	0.294763	0.00532702	0.0872399
Grhpr	55.0343	0.57554	0.356975	0.00532295	0.0872399
Sdf2l1	753.312	0.397773	0.198846	0.00539064	0.0881631
H19	684.449	-0.507257	0.29254	0.0054077	0.0883233
Acbd3	377.016	0.363153	0.174695	0.00546277	0.0891031
Ostc	654.915	0.386391	0.190923	0.0054954	0.0893977
Fchsd2	182.701	0.468108	0.260049	0.00551021	0.0893977
Ift20	420.897	0.375344	0.183243	0.00550318	0.0893977
Dynll2	391.086	0.37008	0.179885	0.00550538	0.0893977
Gem	178.393	0.533257	0.312611	0.00551759	0.0893981
Tmco3	87.5866	0.516816	0.29786	0.00554462	0.0896156
Hspa9	449.226	0.379905	0.186768	0.00554574	0.0896156
Clec5a	222.163	0.478302	0.268712	0.00558381	0.0899919
Fads1	182.028	0.420955	0.218443	0.00557919	0.0899919
Tor3a	164.375	-0.455795	0.248448	0.00561246	0.0901996
Tmem238	49.4381	0.605004	0.389291	0.00561894	0.0901996
Gramd1b	364.47	-0.387927	0.193769	0.00560951	0.0901996
Wwtr1	75.043	-0.634168	0.424085	0.00562647	0.0902014
Coq10b	467.244	-0.380174	0.189365	0.00569025	0.0909814
Tubb4b	231.79	0.396409	0.200788	0.00572626	0.0909814
Gm10800	15.5096	-0.177989	0.327519	0.00573557	0.0909814
Gm43063	8.96216	1.17282	1.18537	0.00574242	0.0909814
Agpat5	254.039	0.395056	0.200203	0.00573248	0.0909814
Ssh2	222.626	-0.421859	0.222349	0.00570729	0.0909814
Pfkp	202.134	0.439641	0.233631	0.00569648	0.0909814
Gm43305	57.2662	-0.678117	0.484277	0.00569807	0.0909814
Atp5o	1180.83	0.321649	0.147921	0.00572958	0.0909814
Sema4a	100.603	-0.518541	0.314629	0.00578887	0.0915982
Itga1	29.3608	-0.789612	0.650019	0.00581954	0.0918446
Egr3	97.0758	0.58145	0.37246	0.00581219	0.0918446
Cdkn2d	115.329	-0.468591	0.262326	0.0058371	0.0920024
Slc35e4	118.274	0.478577	0.269753	0.00586054	0.0921332
Nfkb2	351.328	0.383422	0.193063	0.0058594	0.0921332
Hspd1	514.505	0.339313	0.160878	0.00591577	0.0928814
Tut4	231.637	-0.41155	0.216181	0.00594204	0.0930657
Ldb2	5.65137	-0.0997475	0.22529	0.00594877	0.0930657
Pdcd5	900.966	0.336351	0.159214	0.00595045	0.0930657
Agtrap	204.687	-0.456204	0.255936	0.00597352	0.0933066
Tgfbr3	23.5257	-0.932689	0.873467	0.00601491	0.0935925
Ddias	20.8541	0.784955	0.693553	0.00600875	0.0935925
Btg1	5135.29	-0.368201	0.182663	0.00601467	0.0935925
Cox5a	2551.6	0.322571	0.150476	0.00610459	0.0948667
Pop5	219.936	0.410154	0.214379	0.00612243	0.0949016
Grb10	132.806	-0.614192	0.421445	0.00611513	0.0949016
Dnmt3l	5.50886	1.43731	1.84887	0.00614754	0.0951695
Frmd4b	430.879	-0.370421	0.185937	0.0062038	0.0959144
Icosl	52.6592	-0.586004	0.394831	0.00621142	0.0959144
Degs2	12.9012	-0.214433	0.418763	0.00622109	0.0959419
Thap3	97.1594	-0.529847	0.328826	0.0062347	0.0960302
Tlr1	170.406	-0.491127	0.291127	0.00626941	0.0964427
Zer1	40.8521	-0.633745	0.461342	0.00631709	0.0969985
Dhrs3	1234.89	-0.347731	0.1698	0.00632852	0.0969985
Ankrd17	447.548	0.368588	0.184408	0.00632945	0.0969985
D17H6S53E	23.9395	-0.764407	0.665458	0.00634056	0.0970464
Ercc6	51.9664	0.616201	0.4215	0.00640415	0.0978966
Wsb2	455.078	0.389622	0.201292	0.00642054	0.0980095
Rasip1	12.0819	-0.215078	0.417342	0.00643079	0.0980095
Rtl3	10.6871	-0.178474	0.329903	0.0064357	0.0980095
Itm2b	25220	-0.305658	0.14994	0.0065027	0.098906
Atp1a1	899.905	0.325828	0.155261	0.0065522	0.09903
Cmklr1	258.405	-0.410671	0.221738	0.00653303	0.09903
Sae1	142.998	0.422656	0.230777	0.00655968	0.09903
Rin3	164.946	-0.447233	0.25209	0.00652863	0.09903
Cln5	204.476	0.394123	0.206066	0.00654791	0.09903
Nrk	17.1218	-0.853671	0.815947	0.00655875	0.09903
Scamp2	754.462	-0.362322	0.182829	0.00659854	0.0993701
Sncg	9.69806	-0.125599	0.24974	0.00659374	0.0993701
Rab32	269.451	0.406173	0.216414	0.00661264	0.0994593
Sertad3	32.2491	-0.678665	0.522122	0.0066297	0.0994701
Tmem170b	63.6978	-0.530365	0.33849	0.0066229	0.0994701
Aph1c	402.091	-0.377609	0.194171	0.00664971	0.0996473
Lpar4	13.258	-0.15865	0.293355	0.00668357	0.100032
Pnpla7	316.952	-0.38354	0.199293	0.00669736	0.100115
Efemp1	5.80994	-0.111438	0.235752	0.00672905	0.100465
St3gal4	131.638	-0.438538	0.246236	0.00674363	0.100559
Clec4e	485.824	0.440932	0.250158	0.00676949	0.100799
Vat1	1090.92	0.343223	0.168431	0.00677624	0.100799
Mrpl20	718.533	0.373891	0.19213	0.00683727	0.101444
Bag3	253.167	0.381279	0.198068	0.00683644	0.101444
Mrps6	116.519	0.483303	0.296906	0.00684466	0.101444
Hsd17b12	398.557	0.372951	0.192928	0.00693162	0.102608
Diaph3	21.95	0.734496	0.687723	0.00696248	0.10294
Orai1	284.798	-0.381495	0.201281	0.00700079	0.103135
Pdgfa	344.003	0.428654	0.239394	0.00700111	0.103135
Gpr137b	1002.79	0.396856	0.212304	0.00698509	0.103135
Bdh2	22.6094	0.718136	0.660786	0.00702038	0.103294
Snhg9	204.889	-0.406013	0.222915	0.00704105	0.103473
Nfat5	455.965	0.432211	0.244487	0.00707062	0.103657
Zfp385a	239.979	-0.455518	0.26895	0.00706931	0.103657
Psmd8	1520.77	0.361375	0.184604	0.00714205	0.104578
Pgm1	93.3227	0.486074	0.30468	0.00719157	0.105177
Hbb-bt	7.92888	-0.0260853	0.188782	0.00720982	0.105191
Slc27a1	377.708	0.402916	0.218656	0.00720118	0.105191
Plbd1	289.753	-0.452516	0.270819	0.00722582	0.105298
Pld4	1559.66	-0.346397	0.174635	0.0072719	0.105754
Arhgef6	263.008	-0.378689	0.200955	0.0072745	0.105754
Epb41l4aos	224.517	-0.461173	0.280063	0.00732297	0.106332
Ldlrad3	62.3534	-0.525124	0.345551	0.00734524	0.106528
Isg15	782.547	0.491349	0.31346	0.00738554	0.106985
Kdr	24.6534	-0.718914	0.652907	0.00740816	0.107164
Nlrc3	52.1431	0.548481	0.381697	0.00741551	0.107164
Rac2	933.48	-0.348102	0.177001	0.00745347	0.107585
2310001H17Rik	127.847	-0.459919	0.282497	0.00755118	0.108866
Plvap	9.13617	-0.1641	0.302195	0.00757186	0.109035
Gm13889	13.7296	-0.254709	0.555446	0.00767596	0.110403
Wnt4	32.2505	0.644209	0.557683	0.00771283	0.110731
C1qtnf1	17.9887	-0.32793	1.14716	0.00771696	0.110731
Lair1	586.422	-0.369219	0.195405	0.00772865	0.110768
Mydgf	669.094	0.350006	0.179627	0.0077821	0.111403
Ifit3b	19.1783	-0.748615	0.801331	0.00779462	0.111451
AI467606	39.2254	-0.609379	0.514015	0.00781222	0.111468
Klf2	893.019	-0.378517	0.205105	0.00782678	0.111468
Ldlr	187.39	0.458434	0.278481	0.00781889	0.111468
Slk	347.764	0.360243	0.188568	0.00783244	0.111468
Arhgap9	306.698	-0.372638	0.20213	0.00784411	0.111504
Nus1	449.288	0.334413	0.168362	0.00791534	0.112385
Ankle2	148.95	-0.414582	0.23895	0.00797486	0.113098
Mrpl54	637.158	0.359332	0.188975	0.0079997	0.113318
Sag	21.6963	0.658659	0.722348	0.00807032	0.114186
Il4ra	465.586	-0.353974	0.185901	0.00809042	0.114204
Lrrc25	573.067	-0.439634	0.267735	0.00808313	0.114204
Myc	121.143	0.546796	0.395531	0.00813338	0.114678
Asah1	1633.35	-0.298059	0.1435	0.00814679	0.114734
Uba5	188.396	0.385625	0.213623	0.00817768	0.115036
Zfp451	174.381	0.412189	0.237824	0.00821192	0.115251
Slc16a2	21.3483	-0.260404	0.578274	0.00820278	0.115251
Asgr2	10.9598	-0.149907	0.278812	0.00829406	0.11627
Acsf2	38.7827	-0.602869	0.520863	0.00832192	0.116392
Htr2a	8.19309	0.145018	0.273122	0.00832058	0.116392
Runx1t1	22.5908	-0.296589	0.801956	0.00838351	0.116717
Khnyn	59.2845	-0.519118	0.366528	0.00838278	0.116717
Emilin2	377.064	0.341718	0.176489	0.00837362	0.116717
Fam122a	80.5753	0.472827	0.312445	0.00835721	0.116717
Sirpb1a	18.0356	-0.22534	0.434333	0.0084004	0.116818
Plp2	178.344	0.391532	0.22076	0.00843094	0.117109
Rassf3	561.918	-0.32695	0.165613	0.00845462	0.117304
Rest	265.389	0.364496	0.196112	0.00847722	0.117484
P2ry13	60.0525	-0.540366	0.419603	0.00850457	0.117717
Ctsh	4996.53	-0.368075	0.20151	0.00851339	0.117717
B2m	17473.8	-0.313566	0.160841	0.00853552	0.117889
Tank	459.19	0.382491	0.213895	0.00856388	0.118135
Cstb	5964.06	0.339109	0.17573	0.00857272	0.118135
Kpna3	249.781	0.368019	0.200536	0.00859961	0.118371
Trib1	971.021	-0.327382	0.168035	0.00861187	0.118406
Comp	34.5844	0.58935	0.517465	0.00866738	0.11902
Acta1	326.901	-0.449302	0.289069	0.00867607	0.11902
Hsp90ab1	6278.53	0.282834	0.134594	0.00869943	0.119206
Plin2	1999.48	-0.354451	0.189968	0.00871463	0.11928
Zc3h7a	228.52	0.425297	0.256211	0.00872561	0.119296
Chchd4	79.6943	0.474739	0.314653	0.00883905	0.120711
Rtl8a	58.5592	-0.514408	0.385441	0.00887804	0.121108
Dguok	177.353	-0.40652	0.240645	0.00892728	0.121356
1600010M07Rik	67.2599	-0.514386	0.38607	0.00893615	0.121356
Cd300c2	3343.5	-0.341604	0.182242	0.00892906	0.121356
Arhgap39	66.8229	-0.50627	0.356884	0.00892775	0.121356
Slc25a45	92.6157	-0.456035	0.298491	0.00896271	0.121581
Saa3	18.0728	0.181109	0.328766	0.009007	0.12183
Crip2	73.5938	-0.521929	0.401086	0.00901112	0.12183
Tsc22d3	291.763	-0.366906	0.204394	0.00901039	0.12183
Serping1	65.7232	-0.539448	0.422068	0.00903042	0.121956
Uchl3	160.162	0.393687	0.227253	0.00905192	0.122111
Adh5	423.645	0.331909	0.172648	0.00908216	0.122383
C1ra	34.4347	-0.572736	0.514502	0.00912537	0.122829
Cep83	139.822	0.408411	0.244503	0.00913635	0.122841
Fcgr3	2476.3	-0.352324	0.191512	0.00926608	0.123902
BC035044	15.5144	-0.268559	0.596567	0.00924485	0.123902
Orai3	148.108	-0.408259	0.244504	0.00923626	0.123902
F7	53.4607	0.557138	0.4538	0.00928657	0.123902
Irf2	368.127	-0.369384	0.208271	0.00928635	0.123902
Atp5g1	1527.24	0.308855	0.155366	0.00926884	0.123902
Kif2a	167.408	0.418741	0.257417	0.00925225	0.123902
Coro2a	63.1232	-0.519829	0.389561	0.00930302	0.123986
B4galt3	59.587	-0.495349	0.354815	0.00931558	0.124018
Phactr2	167.906	-0.385715	0.224594	0.00934606	0.124287
Trim12c	90.1394	-0.450319	0.299789	0.00937841	0.124581
Morrbid	104.255	0.478496	0.34058	0.00951992	0.125601
Gucy1a1	6.69508	-0.101988	0.226336	0.00950925	0.125601
Timp4	7.20762	-0.0963465	0.221692	0.00952742	0.125601
Ccl6	1081.4	-0.575719	0.749744	0.00950368	0.125601
Gdpd1	219.599	-0.374584	0.213084	0.00946786	0.125601
Rbfa	326.588	-0.349495	0.190277	0.00948461	0.125601
Lrp5	81.2497	-0.503476	0.38304	0.00950647	0.125601
Arpc5	2081.21	0.288922	0.141915	0.00957998	0.125833
Gpcpd1	235.161	-0.377257	0.217303	0.0095864	0.125833
Syncrip	477.313	0.32899	0.172516	0.00955749	0.125833
4930481A15Rik	27.4168	-0.591558	0.61247	0.00958161	0.125833
Cab39	524.991	0.313607	0.160665	0.009617	0.125963
Stac2	16.1505	0.211058	0.397255	0.00961052	0.125963
Cdh13	11.4253	-0.152023	0.28093	0.00963026	0.125967
Psmd12	445.751	0.337882	0.180863	0.00963802	0.125967
Pkdcc	29.8967	-0.578519	0.612298	0.00967152	0.126269
Synj1	272.754	-0.348744	0.190773	0.0096902	0.126378
Pgp	226.005	0.365269	0.205095	0.00970811	0.126476
Tk1	29.8958	0.584621	0.573445	0.00973165	0.126647
Pla2g2d	44.198	-0.550455	0.714078	0.00975646	0.126783
Sorl1	147.234	-0.422043	0.266599	0.00976294	0.126783
Bvht	47.7603	0.536753	0.44209	0.00977644	0.126823
Clec4a2	920.321	-0.321485	0.168378	0.00979127	0.12688
Ahctf1	114.49	0.423871	0.268084	0.00983491	0.127227
Snrnp25	166.227	0.383698	0.223702	0.00983898	0.127227
Ccl11	11.2771	-0.16614	0.302359	0.00988185	0.127646
Stxbp5	111.825	0.413541	0.257023	0.00989317	0.127656
Purb	647.433	0.314459	0.162343	0.00990683	0.127671
Gripap1	209.972	0.388054	0.232206	0.00991527	0.127671
Gatm	577.331	-0.316763	0.165868	0.0100123	0.128783
Nbn	113.925	0.41252	0.258748	0.0101119	0.129928
Foxj2	101.269	-0.431817	0.284499	0.0101973	0.130886
Galnt2	265.161	0.349028	0.194353	0.0102256	0.131112
Cfb	300.904	-0.414285	0.268014	0.0102892	0.131789
Itgav	463.414	0.373998	0.217967	0.0103441	0.132075
Hras	350.093	0.369261	0.212921	0.010326	0.132075
Pi16	8.83365	-0.140769	0.26577	0.0103348	0.132075
Stk10	130.451	-0.401927	0.249098	0.0103987	0.132633
Gsn	1099.76	0.331141	0.178319	0.0105197	0.13306
Tnfrsf1a	475.658	-0.331574	0.179627	0.0104574	0.13306
Cdkn1b	227.537	-0.380067	0.229186	0.0105197	0.13306
Stk38l	86.8842	0.447357	0.310372	0.0105153	0.13306
Akap12	26.011	-0.568916	0.996149	0.0104591	0.13306
Ykt6	307.157	0.332888	0.18031	0.010475	0.13306
Lyst	240.124	0.394053	0.239248	0.0104835	0.13306
Ppp1r18	694.801	-0.312168	0.163303	0.0105047	0.13306
Dennd1b	154.791	-0.38212	0.228732	0.0105354	0.13312
Daxx	121.769	-0.397728	0.248	0.0106503	0.134433
Il6st	148.256	-0.395222	0.24328	0.0106623	0.134444
Irgm2	27.5898	-0.505394	1.0471	0.0107289	0.135144
Psmc5	471.979	0.327254	0.177345	0.010785	0.135711
Coro1c	595.915	0.329635	0.178769	0.0108201	0.135991
Snhg15	277.827	-0.406673	0.26299	0.0108297	0.135991
Gimap6	18.8844	-0.313597	0.785044	0.0108554	0.136173
Ndufb8	1660.63	0.322096	0.173111	0.0108697	0.136212
Dhx58	96.9911	-0.457351	0.338382	0.0108816	0.136222
Prg4	17.0935	-0.190732	0.344763	0.010893	0.136224
Amot	13.9969	-0.211373	0.390491	0.0109146	0.136354
Sel1l	260.593	0.337309	0.186781	0.0109311	0.13642
Basp1	2684.51	0.34945	0.19857	0.0109776	0.13686
Gm26885	20.7927	-0.0555211	0.197756	0.011003	0.136911
Adrb2	196.231	0.385841	0.239089	0.0110042	0.136911
Adipor1	1025.18	-0.297525	0.153675	0.0110199	0.136967
Gpr68	16.5475	0.258862	0.535864	0.0110682	0.137146
Ip6k3	6.13109	0.111765	0.234374	0.0110561	0.137146
Xlr	40.4173	0.506224	0.481814	0.0110578	0.137146
Sh3bgrl3	8180.63	0.319462	0.171711	0.0111041	0.137452
Uhrf1	26.803	0.560764	0.835455	0.0111787	0.138234
1500026H17Rik	8.70796	-0.124449	0.247084	0.0112356	0.138687
Dcn	458.732	-0.369776	1.07796	0.0112381	0.138687
Lpar6	80.3672	-0.471483	0.414278	0.0112514	0.13871
Tnfsf10	8.55854	-0.140552	0.265093	0.0112954	0.139112
Gm48066	15.328	-0.192151	0.346597	0.0113801	0.140014
Card19	1006.9	0.333659	0.1859	0.0114041	0.140166
Plaat3	234.771	0.392462	0.24698	0.0114267	0.140303
Nasp	242.621	0.357644	0.211261	0.0114417	0.140346
Megf6	13.6024	0.189265	0.343106	0.0114625	0.140459
Gm15832	34.3324	-0.545846	0.659581	0.0115404	0.140974
Ufm1	433.305	0.314996	0.169717	0.0115509	0.140974
Uso1	189.57	0.368031	0.220596	0.0115366	0.140974
Bambi	66.9277	-0.467076	0.36122	0.0115317	0.140974
Cct3	411.412	0.337333	0.190441	0.0116671	0.142107
Klra17	13.6113	-0.185166	0.332443	0.0116624	0.142107
Mast4	44.904	-0.528046	0.705357	0.0117224	0.142639
Mxra8	110.098	-0.496051	0.461917	0.0118341	0.143631
Pde3a	8.37648	-0.128436	0.251282	0.0118393	0.143631
Shisa9	42.8241	0.498214	0.45814	0.0118394	0.143631
Jpt2	62.947	0.477068	0.416834	0.0118749	0.143918
Stab2	6.29259	-0.100186	0.224407	0.0119854	0.145113
Calr	3606.2	0.320936	0.177456	0.0121434	0.14688
Pmvk	157.292	0.367765	0.225706	0.0122145	0.147593
Gm5431	29.5597	-0.431233	0.89021	0.0123682	0.14917
Ypel2	31.7652	-0.478362	0.740376	0.0123696	0.14917
Slain2	194.838	0.355833	0.215597	0.0123921	0.149271
Hexim1	691.216	0.404431	0.278123	0.0124025	0.149271
Arhgap10	320.997	0.35337	0.212994	0.0124322	0.149481
0610012G03Rik	1229.58	0.284427	0.147934	0.0124927	0.15006
Antxr1	98.7756	-0.482782	0.458444	0.0125391	0.15047
Hdlbp	778.609	0.297156	0.158593	0.0125899	0.15093
Etv3	655.792	-0.337086	0.196273	0.0126562	0.151304
Cib1	419.884	0.310659	0.170486	0.0126584	0.151304
Spred2	86.7296	0.442056	0.335265	0.0126469	0.151304
Rnf19b	1092.75	0.325021	0.184032	0.0127131	0.151809
Zfp46	17.1975	-0.243306	0.470015	0.0127553	0.152014
Canx	1669.3	0.277599	0.143148	0.0127461	0.152014
S100a11	1353.03	0.327681	0.187379	0.0128262	0.152709
Ppp4r2	325.777	0.328588	0.189106	0.0128598	0.152819
Gm30541	9.86491	-0.132816	0.255612	0.0128605	0.152819
Atp5g3	1346.34	0.272322	0.140213	0.0128773	0.15287
Bag1	1096.33	0.282154	0.148073	0.0131899	0.156275
Bicc1	75.8761	-0.484956	0.559574	0.0131852	0.156275
Col6a6	7.98906	-0.131644	0.254294	0.0132379	0.156691
Ncbp2	195.963	0.341348	0.204289	0.0133279	0.157474
Sms	235.62	0.328611	0.190618	0.0133299	0.157474
Nat10	46.5713	0.459893	0.409524	0.0134072	0.158019
Cd24a	77.1929	0.480722	0.512094	0.0134346	0.158019
Nol8	85.09	0.416467	0.318461	0.0134029	0.158019
Smim4	251.296	-0.410013	0.304776	0.013441	0.158019
Rap2a	576.696	0.311545	0.174212	0.0134194	0.158019
Immt	283.132	0.322811	0.185331	0.0134679	0.158182
Pi15	7.37307	-0.118648	0.240819	0.0135263	0.158715
Slc20a1	144.023	0.384319	0.258812	0.0135393	0.158715
Zbtb11	184.081	0.362153	0.230437	0.013589	0.159145
Nap1l1	928.292	0.292589	0.158147	0.0136057	0.159187
Mrpl51	469.221	0.298397	0.163382	0.0136579	0.159643
Spc24	21.8862	0.304517	0.676806	0.0137888	0.161019
Igtp	39.4185	-0.48113	0.524016	0.0138038	0.161039
Ndufb9	1512.21	0.281534	0.149348	0.0138204	0.161079
Traf3	91.3566	0.410406	0.302003	0.0139324	0.162229
Numa1	277.135	-0.329135	0.19449	0.01395	0.162279
Sod2	838.641	0.326874	0.191958	0.0139927	0.16262
Tmem176b	2446.24	-0.349128	0.22017	0.0140174	0.162751
Nsmaf	65.7734	-0.423777	0.33852	0.0140657	0.163002
Sgta	295.359	0.327509	0.193388	0.0140657	0.163002
S100a6	2767.79	0.346903	0.214749	0.0140848	0.163067
G3bp1	435.468	0.324603	0.190295	0.0141273	0.163403
Arl4a	210.218	0.334363	0.201003	0.0142167	0.164282
Pde4b	972.457	-0.309719	0.178832	0.0143267	0.165396
Pbx1	57.4457	-0.4616	0.474609	0.014348	0.165485
Irak2	209.201	-0.359403	0.231627	0.0144027	0.165959
Ppia	10117.8	0.257966	0.132284	0.0144608	0.16647
Cct6a	521.096	0.301996	0.169393	0.0144891	0.166609
Pard3	13.7545	-0.178974	0.318125	0.0145251	0.166609
Tecpr2	26.9769	-0.421908	0.730353	0.0145276	0.166609
Phf11a	18.1009	-0.224568	0.408444	0.0145258	0.166609
Cdc42bpg	54.0177	0.435871	0.385898	0.0145946	0.16722
Gm11110	10.3144	0.140318	0.262587	0.0146918	0.168174
Pkig	487.841	-0.299952	0.169571	0.0147373	0.168537
Pf4	6716.18	0.349299	0.222917	0.0148063	0.169167
Pbdc1	285.455	0.314078	0.182477	0.0148213	0.16918
Ppt2	295.124	-0.331248	0.201748	0.0148605	0.169468
Gm47863	36.4856	-0.448507	0.493304	0.0149696	0.170552
Tshz3	15.2612	-0.157109	0.284668	0.0150039	0.170623
Adi1	109.29	-0.383447	0.289076	0.0150002	0.170623
Dst	271.597	0.370381	0.252198	0.0150581	0.170921
Col5a3	94.1302	-0.44476	0.515895	0.0150469	0.170921
Gbp3	122.602	-0.377283	0.269906	0.0151646	0.171969
Dse	380.437	-0.305233	0.176319	0.0151809	0.171993
Dtymk	193.447	0.35056	0.225154	0.0152351	0.172287
Cish	45.2936	-0.445853	0.460162	0.0152226	0.172287
Fmn1	204.148	0.353155	0.2312	0.0153325	0.173174
Dera	211.213	0.327477	0.200095	0.015342	0.173174
Sap30	504.523	0.322075	0.194232	0.0153688	0.173316
Oaz1	6102.04	0.256845	0.133881	0.0154819	0.17443
Tm4sf1	131.752	-0.423406	0.376351	0.0155305	0.174815
Pamr1	61.2377	-0.412707	0.680236	0.0155976	0.175409
Ifi208	5.4773	-0.0863058	0.213782	0.0157856	0.177358
Mlec	327.936	0.320319	0.193127	0.0158286	0.177527
Cirbp	427.385	-0.301646	0.175077	0.0158298	0.177527
Naga	247.601	-0.34721	0.227267	0.0158477	0.177564
Slc28a2	54.5553	-0.396823	0.55469	0.016121	0.180294
Ccl4	11618.8	0.254161	0.474394	0.0161118	0.180294
Smox	186.318	-0.364632	0.256694	0.016177	0.180755
Mrpl12	418.673	0.318045	0.193066	0.0162507	0.181412
Smarca1	8.68225	-0.122945	0.244105	0.0162854	0.181466
Igbp1	310.907	-0.326865	0.204093	0.0162772	0.181466
4930581F22Rik	24.2753	-0.239733	0.437181	0.0163659	0.182196
Nsd2	113.951	0.371799	0.266471	0.0164432	0.182889
Mcm7	69.868	0.412233	0.380124	0.0164681	0.182999
Sh3bgrl2	29.8797	0.327607	0.59577	0.0165446	0.183681
Mettl1	77.9014	0.389256	0.305814	0.0166076	0.184004
Abca6	6.67791	-0.100754	0.224001	0.0166191	0.184004
Eif3a	1361.53	0.265543	0.146457	0.0166183	0.184004
Tulp4	323.565	0.307729	0.183479	0.0166658	0.184354
Apoc2	723.079	-0.365498	0.263843	0.0167524	0.185143
Smcr8	116.353	0.358115	0.253313	0.0167926	0.18542
Mgll	27.9245	-0.247966	0.44871	0.0170423	0.187796
Pfkfb4	110.161	-0.369882	0.277428	0.0170541	0.187796
Tbc1d31	40.5941	-0.415996	0.45671	0.0170273	0.187796
Tnnc1	18.1081	0.148637	0.272376	0.0170857	0.187974
Sdc2	50.0208	-0.40441	0.586011	0.0171087	0.188056
Alox5	32.0531	0.370885	0.582124	0.0171985	0.188873
Clk1	759.901	-0.298417	0.184045	0.0172223	0.188964
Col6a2	271.735	-0.389487	0.32794	0.0172818	0.189275
Fth1	139161	0.312182	0.191168	0.01727	0.189275
Oxsr1	93.7825	0.375286	0.289213	0.0173077	0.189388
Rhob	1169.03	-0.304565	0.184459	0.0173389	0.18956
Ywhah	958.117	0.270884	0.150137	0.0173928	0.189978
Chchd7	235.737	0.324238	0.206778	0.0174628	0.190474
Nudt16l1	90.8511	-0.381705	0.300656	0.0174695	0.190474
Hebp1	1354.14	0.303793	0.182877	0.0174877	0.190502
Znfx1	170.838	-0.338417	0.227985	0.0175588	0.191105
Pde8a	95.1088	0.376683	0.292673	0.0175938	0.191308
Mcm4	73.2977	0.380194	0.307098	0.0176089	0.191308
Man1a	611.83	0.289686	0.169033	0.0176362	0.191434
Cdk12	341.219	0.334663	0.22336	0.0176638	0.191563
Gpr160	105.01	-0.373359	0.298271	0.0176888	0.191663
Hspg2	152.188	-0.393042	0.335526	0.0177126	0.19171
Bin1	683.887	0.279678	0.159343	0.0177246	0.19171
Emp3	3101.22	0.263516	0.14466	0.0177753	0.192087
Hlx	94.7368	-0.380069	0.307158	0.0177936	0.192114
Gpm6b	24.5077	-0.227017	0.404162	0.0178509	0.192562
Zcchc24	167.656	-0.341706	0.235747	0.0178837	0.192745
Parp2	267.282	-0.322847	0.209592	0.0179627	0.193425
Igha	8.08409	-0.0185386	0.187467	0.0180094	0.193756
Boc	8.80554	-0.122766	0.243681	0.0181074	0.194638
Plscr4	18.6982	-0.225466	0.401083	0.0181552	0.194839
Fam43a	65.4304	0.396267	0.404701	0.018158	0.194839
Parp8	135.054	-0.345246	0.240516	0.0182014	0.195132
Rfc4	56.7304	0.387459	0.360184	0.0183643	0.196705
Psmb6	1795.4	0.296733	0.178739	0.0184378	0.197318
Lrrfip1	518.711	0.28311	0.164877	0.018518	0.198003
Dnph1	13.9557	0.186024	0.324517	0.0185616	0.198294
Gm10655	6.60933	-0.108337	0.230089	0.0186048	0.198582
Tmem51	213.539	-0.339616	0.237781	0.0186305	0.198682
Fuom	174.227	0.32803	0.218526	0.018735	0.199621
Zfp710	162.858	-0.339075	0.239603	0.0188202	0.200353
Dusp22	134.481	-0.347169	0.251797	0.0188796	0.200811
Anxa3	749.372	0.280554	0.163513	0.0189419	0.201297
Rps27rt	292.043	-0.340552	0.243019	0.0189825	0.201553
Gcfc2	16.5606	0.219376	0.385473	0.0190035	0.2016
Stat3	477.232	-0.303788	0.198893	0.0190898	0.202339
Pdk2	32.9809	-0.311932	0.538354	0.0191916	0.203241
Adam9	400.031	0.295109	0.180048	0.0192201	0.203365
Brox	241.749	0.304681	0.1912	0.0192429	0.20339
Atp6v1a	1581.48	0.260366	0.145308	0.0192559	0.20339
Smim40	30.8876	-0.364583	0.57514	0.0193418	0.204121
Scarb1	184.946	-0.348553	0.257032	0.0194943	0.205552
Acvrl1	208.787	-0.32381	0.218083	0.019531	0.205761
Sema6d	27.506	-0.211785	0.363906	0.0196231	0.206462
AW551984	7.25999	-0.0967156	0.220617	0.0196485	0.206462
Aoc3	21.797	-0.167674	0.29641	0.0196337	0.206462
Tnnt1	38.504	0.335073	0.543439	0.0197048	0.206874
Btbd3	28.0405	-0.317127	0.554772	0.0197513	0.207006
Vps29	852.579	0.26897	0.154218	0.0197439	0.207006
Mef2c	906.949	-0.279029	0.165869	0.0198122	0.207465
Fcrl1	39.4168	-0.367256	0.54329	0.0198964	0.207992
Foxo3	201.558	-0.311472	0.203429	0.0198966	0.207992
Plat	48.6279	-0.341198	0.557902	0.0199427	0.208294
Enho	16.1168	-0.21012	0.366188	0.0200002	0.208308
Rarres2	21.73	-0.255689	0.455474	0.0199823	0.208308
Gcsh	239.857	0.298308	0.18697	0.0200125	0.208308
Ell2	335.223	0.340625	0.249044	0.0199897	0.208308
Elmsan1	187.216	-0.327035	0.226428	0.0201005	0.209045
Adamts1	80.2923	-0.364433	0.515364	0.0202254	0.210165
Timp1	144.812	0.37824	0.364074	0.0202457	0.210196
F11r	143.208	-0.364507	0.304206	0.0203067	0.210649
Mfsd1	872.024	0.261872	0.14934	0.0203748	0.211176
Ccl24	98.9811	-0.364973	0.357976	0.0204788	0.211713
Ptprg	10.1058	-0.127568	0.247633	0.020477	0.211713
Slc9a3r2	21.8785	-0.195619	0.336111	0.0204732	0.211713
Itga6	413.165	0.294031	0.18278	0.0205618	0.21203
Cir1	259.217	-0.313042	0.209105	0.0205505	0.21203
9930111J21Rik2	159.578	-0.363955	0.400023	0.0205458	0.21203
Sp140	301.34	-0.319174	0.219673	0.0206022	0.212267
Erc1	44.6913	0.359392	0.503185	0.0206778	0.212866
Srsf3	1222.33	0.299081	0.190432	0.0207252	0.213173
Cbll1	100.97	0.344839	0.267987	0.0207446	0.213192
Gm10138	59.743	-0.367128	0.392327	0.0207801	0.213323
Eif4g2	1547.35	0.254834	0.143752	0.0207923	0.213323
D330023K18Rik	49.3373	-0.356713	0.47447	0.0209439	0.214516
Reps2	182.526	-0.315694	0.215167	0.0209344	0.214516
Dynlt1f	146.033	-0.365766	0.321228	0.0209719	0.214622
Dpt	181.52	-0.369438	0.362903	0.0210531	0.215272
Chp2	64.4753	-0.313089	0.481861	0.0211622	0.21619
Slc14a1	14.8949	-0.183139	0.317207	0.0211784	0.21619
Parp12	103.524	-0.346527	0.275731	0.02121	0.216331
Pdlim7	123.657	0.356837	0.293272	0.0212675	0.216736
Myd88	209.988	-0.305574	0.202796	0.0212987	0.216873
Adgrg6	42.7849	0.366667	0.42265	0.0213687	0.217323
Txndc17	1745.4	0.255318	0.144718	0.0213787	0.217323
Msx1	7.94889	-0.100154	0.223255	0.0214273	0.217636
Idh3g	385.917	-0.309406	0.207253	0.0214475	0.217659
Ucp2	2974.6	-0.293081	0.187034	0.021477	0.217776
Ddt	434.257	0.298147	0.191124	0.0215105	0.217934
Psmd13	396.484	0.286936	0.178423	0.0216001	0.218478
Xpnpep3	16.3476	-0.203025	0.348719	0.0215974	0.218478
Prxl2b	625.645	0.296976	0.192472	0.021733	0.219178
Insig1	228.931	0.297855	0.193296	0.0217412	0.219178
Eln	125.717	0.365093	0.337819	0.0217026	0.219178
Tspan9	13.539	-0.167865	0.295201	0.0217374	0.219178
Clu	5.63766	-0.0858341	0.212986	0.0217763	0.219349
Tnnt2	29.8201	0.223945	0.385483	0.0218937	0.220146
Fam20c	394.593	0.331341	0.244917	0.0218792	0.220146
Gxylt2	53.555	-0.316736	0.503171	0.0219096	0.220146
Col8a2	24.1622	0.205158	0.354302	0.0220528	0.221401
Nosip	180.146	-0.313356	0.217936	0.0221207	0.221717
Ndst1	153.395	-0.332978	0.249091	0.0221057	0.221717
Pttg1	204.185	-0.310544	0.21441	0.0221903	0.221866
Dapk1	142.5	0.317465	0.223924	0.0221687	0.221866
Atf4	1317.39	0.262368	0.154122	0.022188	0.221866
1110059G10Rik	149.914	-0.329616	0.248118	0.0222319	0.2221
Sft2d2	226.112	-0.298527	0.196533	0.0223062	0.22266
Lamtor4	1533.62	0.294444	0.190875	0.0223463	0.222865
Bcl6	62.1915	-0.358514	0.340331	0.0223635	0.222865
Slc49a4	387.176	0.282571	0.176017	0.0223868	0.222915
Trp53inp1	68.5562	-0.363472	0.376093	0.0224214	0.223078
6330562C20Rik	15.8745	-0.181103	0.31304	0.022571	0.224016
Slc36a1	132.627	-0.327875	0.245218	0.0225346	0.224016
Ermard	75.3974	-0.354219	0.369426	0.0225683	0.224016
Map2k3os	22.3461	0.222172	0.375608	0.022642	0.224538
Acsl1	154.524	0.323929	0.238055	0.0226921	0.224852
Dpy30	298.451	0.288487	0.18421	0.0228125	0.225861
Crebl2	24.6308	-0.243752	0.411649	0.0229048	0.22659
Fabp5	18928.9	0.325772	0.242684	0.0229883	0.22711
Mxd4	406.73	-0.277596	0.173583	0.0230134	0.22711
Trim12a	101.033	-0.338458	0.284245	0.0230031	0.22711
Mfap2	95.4215	-0.345529	0.450537	0.0230699	0.227307
Cyb5r3	576.265	0.282849	0.178425	0.0230707	0.227307
Pebp1	1038.79	0.257763	0.151334	0.0231096	0.227454
Baz1a	351.722	0.297932	0.198033	0.023123	0.227454
Zc3h6	28.9398	-0.273953	0.463073	0.0231438	0.227475
Vasp	500.329	0.275032	0.169772	0.023234	0.228089
Llph	714.714	0.254857	0.149038	0.0232438	0.228089
Abcg3	103.13	-0.335208	0.294795	0.0232881	0.22834
Stat5b	78.2264	-0.343261	0.299811	0.0233129	0.228399
Tbc1d9	220.349	0.296724	0.199354	0.0234829	0.229879
Dnajb4	324.213	0.283216	0.18097	0.0235433	0.229915
Hvcn1	357.111	0.314346	0.226111	0.0235086	0.229915
Gtf2h1	178.674	0.309862	0.220863	0.0235424	0.229915
Irf9	148.366	-0.321602	0.244941	0.0235873	0.23016
Cux1	593.581	0.258685	0.153735	0.023698	0.230871
Vps35	628.898	0.25889	0.153605	0.0236956	0.230871
Ctns	80.771	-0.349797	0.322689	0.0237289	0.230986
Prkar1a	1034.39	0.249509	0.144944	0.0237936	0.231431
Xkr8	10.1201	-0.127532	0.246239	0.0238233	0.231507
Casp12	18.1484	-0.181573	0.312386	0.0238394	0.231507
Chsy1	73.8809	-0.349023	0.344252	0.0238913	0.231666
Pygm	31.5425	0.296142	0.45712	0.0238939	0.231666
Fhl1	20.299	-0.178875	0.308035	0.0239198	0.231733
Ddx1	217.967	0.300566	0.208038	0.0239397	0.231741
Epha3	14.7691	-0.157221	0.279211	0.0240604	0.232724
Speg	48.6585	0.292636	0.473505	0.0241164	0.23308
Glrx2	312.619	0.274063	0.171886	0.0241979	0.233497
Mir142hg	9.98752	-0.132385	0.251539	0.0241864	0.233497
Gys1	50.7652	0.347383	0.380683	0.0242574	0.233886
Sox4	158.669	-0.347932	0.356773	0.0243671	0.234758
Dnajc3	601.981	0.25845	0.155034	0.0243876	0.23477
Rasgrp3	109.044	-0.335138	0.284899	0.02445	0.235184
Kcnq1ot1	193.828	0.314907	0.232435	0.0244775	0.235262
Sesn1	194.171	-0.317486	0.243418	0.0245008	0.2353
Rhoc	429.419	0.292798	0.196332	0.0246025	0.235682
Npy	87.506	0.122154	0.241442	0.0245789	0.235682
Spsb4	10.9144	0.145955	0.265893	0.024618	0.235682
Hspa4	591.337	0.264347	0.162074	0.0246147	0.235682
Crybg3	188.346	0.297676	0.205635	0.0246738	0.236031
Adar	112.761	-0.322008	0.254697	0.0247656	0.23668
Slc35b1	277.427	0.291052	0.194871	0.0247806	0.23668
Tmem198b	51.6211	-0.339937	0.384608	0.0248463	0.237004
Tlr7	405.674	-0.285629	0.189282	0.0248534	0.237004
Lamb1	101.957	-0.341846	0.339605	0.0250738	0.238918
5430405H02Rik	24.7346	-0.22313	0.368523	0.025137	0.239058
Polr2l	325.327	-0.315328	0.239767	0.0251475	0.239058
Dnm1l	152.062	0.315118	0.241555	0.0251098	0.239058
Cenps	19.1528	0.198824	0.333661	0.0252236	0.239221
Naip5	68.6321	-0.339219	0.313827	0.0251995	0.239221
Tmem204	8.4906	-0.11295	0.232623	0.0252093	0.239221
Oas1a	142.313	-0.149809	0.269553	0.0252481	0.239267
Nfkbid	298.555	-0.31221	0.239568	0.0253146	0.23959
Atp5h	2917.24	0.248042	0.141336	0.0253215	0.23959
Vnn3	14.892	-0.155351	0.276085	0.0253996	0.240126
Eaf1	174.943	0.311983	0.231126	0.0254177	0.240126
Cct2	728.414	0.249306	0.14824	0.0255556	0.241242
Actg1	9774.07	0.26845	0.169594	0.0257477	0.242867
Osgin2	104.05	0.340004	0.363603	0.0258406	0.243554
Asap1	354.027	0.269164	0.17086	0.0258723	0.243665
Spdl1	61.6125	0.335202	0.338475	0.0259194	0.243919
Stard4	37.6104	0.320384	0.434971	0.0260235	0.24471
Cbr4	49.3086	-0.310295	0.406917	0.0260808	0.245059
Phf1	49.0044	-0.332111	0.383513	0.0261386	0.245412
Cd79b	70.2427	-0.329736	0.343556	0.0262449	0.246221
Kin	74.7474	-0.329142	0.304705	0.0262869	0.246425
Atp13a2	737.941	-0.272098	0.186503	0.0264145	0.247239
Coq7	131.207	0.310202	0.235892	0.0264093	0.247239
Trim25	584.23	-0.271539	0.177842	0.0265211	0.248047
Rnf19a	108.556	0.319036	0.256685	0.0265578	0.248056
Kctd12b	32.7733	-0.299472	0.433956	0.0265629	0.248056
Pim3	456.893	-0.307311	0.235411	0.026601	0.248222
Hic2	24.1817	-0.231627	0.37885	0.0266465	0.248456
Gmnn	87.3476	0.32296	0.273211	0.0266823	0.248584
Slc29a1	270.74	-0.278729	0.187009	0.0267011	0.248584
Pcmtd2	81.5008	-0.325669	0.351978	0.0267271	0.248636
Ddx58	153.781	-0.301952	0.225075	0.0267645	0.248775
Elmo1	321.932	0.266361	0.169951	0.0267948	0.248775
Nedd9	77.1977	-0.329361	0.297347	0.0268035	0.248775
Psmb7	570.116	0.256703	0.158771	0.0268775	0.249272
Unc45a	96.1609	0.323177	0.272717	0.0269531	0.249783
Hdgfl3	15.232	-0.148024	0.266578	0.0269969	0.249999
Cst3	15766.3	-0.252959	0.158085	0.027019	0.250013
Ap1s1	406.453	0.271601	0.176742	0.0270486	0.250097
Gbp4	7.73209	-0.0986484	0.220884	0.0270988	0.250371
Mitd1	67.4331	-0.327363	0.310696	0.0272806	0.251668
Gm48591	12.639	-0.149142	0.267772	0.0272667	0.251668
Tnfsf18	6.7061	-0.0899038	0.215102	0.0274599	0.252355
Atp6v0b	3823.53	0.232937	0.13562	0.027441	0.252355
A430010J10Rik	12.1464	-0.0181644	0.187388	0.0274223	0.252355
Plxnc1	313.897	0.273706	0.180955	0.0274508	0.252355
A930001M01Rik	23.8444	-0.20996	0.347015	0.0274483	0.252355
Mir155hg	35.195	0.221895	0.367504	0.0274795	0.252355
Rbpms	80.5259	-0.323536	0.310162	0.027513	0.252472
Caprin2	48.6162	0.237835	0.379007	0.0276536	0.253572
Ppp2r5b	42.0316	0.300949	0.400904	0.0277878	0.25461
Cd276	124.888	0.313432	0.253608	0.0279001	0.255447
Arf4	1165.57	-0.243365	0.143758	0.0279496	0.255707
Cnrip1	64.8809	-0.321819	0.340189	0.0280635	0.256557
Abi3	223.853	-0.325147	0.292255	0.0282263	0.257657
Ezr	456.237	0.281554	0.194173	0.0282141	0.257657
Pla2r1	6.20294	-0.0946709	0.218348	0.0283443	0.25836
Ten1	485.683	0.265102	0.172454	0.0283457	0.25836
Dipk1a	110.862	-0.313533	0.26842	0.0283691	0.25838
Mastl	9.78057	0.119961	0.238342	0.0285116	0.259483
Mthfs	360.263	-0.307883	0.253109	0.028544	0.259584
Plekho2	905.412	-0.260325	0.168079	0.028678	0.260608
Srp9	1378.62	0.252097	0.157593	0.0287202	0.260628
Bank1	30.1932	-0.223722	0.358807	0.0287231	0.260628
Baz2a	141.355	-0.307407	0.256971	0.0287496	0.260675
Timm10	105.88	0.30659	0.249149	0.0288942	0.260745
Nfkb1	861.966	0.28453	0.201897	0.0288451	0.260745
Gbp6	14.4231	-0.112067	0.230517	0.0288562	0.260745
Tmem119	145.755	0.303357	0.24093	0.0289074	0.260745
Ccpg1	215.117	-0.28643	0.207694	0.0288807	0.260745
Chmp2b	254.738	0.271502	0.1831	0.0288873	0.260745
Ndufb10	1089.52	0.242677	0.147856	0.0288699	0.260745
Nfam1	345.716	-0.283158	0.203313	0.0289425	0.260868
Irak3	101.879	0.313776	0.285234	0.0290044	0.261233
Plekhf1	8.85775	-0.101114	0.22265	0.0290698	0.261435
Clec10a	256.754	-0.156824	0.275877	0.0290619	0.261435
Ccdc69	13.3882	-0.154095	0.272933	0.0291046	0.261554
Lrpprc	102.735	0.312261	0.286947	0.0291979	0.2622
Sema6b	24.2775	-0.235386	0.376125	0.029333	0.263218
Nup62	85.8945	0.313111	0.275073	0.0294373	0.263766
Havcr2	199.413	0.285448	0.204671	0.0294374	0.263766
Map7d3	9.85534	-0.123181	0.240706	0.0294796	0.26395
Apba1	49.6478	-0.314032	0.359525	0.0296031	0.264666
Itm2a	369.179	-0.15155	0.270271	0.0295992	0.264666
Gpi1	1144.64	0.261239	0.170981	0.0296512	0.264869
Ms4a6c	2680.55	-0.237012	0.143829	0.0296694	0.264869
F830016B08Rik	10.4428	-0.120179	0.237642	0.0298285	0.266094
Klhl24	239.871	-0.275855	0.19272	0.0298868	0.266419
Zfp787	152.061	-0.304837	0.26209	0.0300335	0.266945
Gipc1	184.852	0.294331	0.228486	0.0300109	0.266945
Tfap4	18.6792	-0.180395	0.302897	0.02999	0.266945
Kif5b	613.977	0.259786	0.169842	0.0300155	0.266945
Rab43	274.148	-0.270178	0.186362	0.0301038	0.267042
Arl8b	624.539	0.268383	0.181291	0.0301103	0.267042
Cd14	5837.01	-0.303789	0.258258	0.0301089	0.267042
Cdk2ap1	120.841	-0.307615	0.274275	0.0302723	0.268284
Zbtb20	360.12	-0.307357	0.269449	0.0303131	0.26845
Eef1akmt4	45.5646	0.309393	0.363962	0.0304194	0.269091
Piezo2	15.6028	-0.147292	0.265253	0.0304297	0.269091
Zbtb7b	97.8223	-0.30214	0.267709	0.0304856	0.269389
Unkl	14.875	-0.151387	0.268458	0.0305835	0.270058
Gpr155	98.3836	-0.316709	0.29394	0.0306725	0.270648
Fdft1	30.7524	0.265387	0.399404	0.0308188	0.271741
Ggta1	201.728	-0.278587	0.200987	0.0308944	0.272093
Abcd4	83.6136	0.308141	0.296567	0.0309034	0.272093
Ttl	42.752	0.302429	0.380247	0.0309548	0.2721
Mrps12	258.203	0.265835	0.181457	0.0309712	0.2721
Rnaset2a	457.371	-0.179086	0.301111	0.0309654	0.2721
Ppfia1	146.647	0.288008	0.22057	0.0311039	0.273068
Rad23b	385.391	0.254697	0.166562	0.0311869	0.273402
Daglb	528.982	-0.258995	0.172167	0.031167	0.273402
Ralb	403.803	0.254958	0.167195	0.0312471	0.273733
Ephb4	7.12694	-0.100278	0.22213	0.0312983	0.273984
Gm14461	13.5529	-0.14128	0.258255	0.0313412	0.274162
P2rx4	1017.34	-0.269598	0.195259	0.0314867	0.275039
Max	270.626	-0.266159	0.184168	0.0314647	0.275039
Gm43017	13.9059	0.136948	0.252472	0.0315293	0.275214
Mvp	363.86	0.278032	0.202197	0.0316023	0.275564
Rpl39	14709	-0.238466	0.155394	0.0316146	0.275564
Elovl5	98.8922	-0.303969	0.278256	0.0317381	0.276244
Dhx29	67.2124	0.306214	0.300039	0.0317376	0.276244
Fdx2	302.523	0.265638	0.183387	0.031818	0.27657
Txnl1	560.862	0.255373	0.168986	0.031821	0.27657
Larp1b	68.7651	0.307353	0.310934	0.0319125	0.277167
Fam117b	206.499	-0.273226	0.197699	0.0321125	0.27811
Tnrc18	262.699	-0.274142	0.199535	0.032069	0.27811
Hnrnpa2b1	1769.78	0.240294	0.150865	0.0321088	0.27811
Adcy4	6.41623	-0.087218	0.213067	0.0320652	0.27811
4930447K03Rik	7.40882	-0.09653	0.219233	0.0321853	0.278542
Naalad2	19.835	-0.167456	0.287027	0.0322392	0.278811
Emc8	236.594	0.276385	0.200617	0.0322686	0.278866
Gm38335	45.1664	-0.290386	0.379528	0.0323352	0.279244
Slc12a6	168.47	-0.279614	0.209943	0.0323909	0.279527
Serpinb8	180.534	0.291746	0.244208	0.0325248	0.280483
Lama2	41.2092	-0.23745	0.368048	0.0326053	0.280779
Arhgdia	2565.49	0.243257	0.155569	0.0326026	0.280779
Rbpj	903.905	0.263542	0.183102	0.0326316	0.280808
Mtus1	167.288	-0.286486	0.231459	0.0327882	0.281653
Cbarp	13.8934	-0.134524	0.250465	0.0327993	0.281653
Rnf139	71.0631	-0.305943	0.317441	0.0327979	0.281653
Cdon	13.7794	-0.132478	0.249272	0.0328479	0.281688
Ccnb2	27.866	0.195861	0.322512	0.0328511	0.281688
Ccdc86	223.843	0.279075	0.210717	0.0328729	0.281688
2210408F21Rik	30.2702	0.241326	0.363846	0.032969	0.282115
Reps1	100.093	0.296967	0.25699	0.032964	0.282115
Eif5a	1848.77	0.231529	0.144182	0.0330448	0.282369
Exoc6	122.42	-0.295792	0.272224	0.0330452	0.282369
Alox5ap	1940.18	0.246722	0.161157	0.0331267	0.282867
Mras	38.7253	-0.276603	0.378284	0.0332078	0.283361
Cdk6	239.919	0.270019	0.194151	0.0332598	0.283606
Mrpl14	514.331	0.250723	0.166367	0.0333988	0.284393
Zfp91	817.723	0.237392	0.150441	0.0333989	0.284393
Lyve1	46.3623	0.0798267	0.20876	0.0336177	0.285856
Slc16a9	7.06872	-0.0949363	0.217751	0.0335981	0.285856
P2ry6	589.931	-0.254073	0.174652	0.0336533	0.285959
Ptpmt1	481.969	0.25058	0.167114	0.0337531	0.286269
Slc8b1	234.689	-0.276213	0.207355	0.0337278	0.286269
Zfp719	31.7574	0.239888	0.364894	0.0337603	0.286269
Zfp276	16.9237	-0.169788	0.287912	0.0338039	0.286419
Ablim1	11.8835	-0.110899	0.229187	0.0338251	0.286419
Ube2g2	159.844	0.276817	0.210363	0.0338643	0.286551
Gm29291	28.754	-0.206087	0.328614	0.0340149	0.286828
Sec23b	130.146	0.288735	0.23654	0.0339943	0.286828
Bola1	141.996	0.285544	0.235202	0.033976	0.286828
Gm29367	9.76596	0.121552	0.238262	0.0339314	0.286828
Mbd6	126.962	-0.286761	0.235061	0.0339729	0.286828
Slc22a23	6.89861	-0.0948703	0.217723	0.0340752	0.287138
Cstf1	45.8542	-0.282287	0.353415	0.0341669	0.287512
Dnase1l1	359.864	-0.276518	0.212637	0.0341527	0.287512
Slc9a4	10.9405	0.129291	0.245549	0.0342389	0.287919
Txlnb	12.6102	0.124647	0.240469	0.0343241	0.288436
Mapk12	8.55639	-0.0929444	0.216174	0.0343507	0.28846
Tmem37	823.342	-0.262814	0.187725	0.0344249	0.288884
Hspb11	202.496	0.271286	0.200923	0.0345105	0.289403
Dock10	412.14	0.259835	0.182913	0.0349382	0.292788
Dhrs11	17.253	-0.171506	0.289158	0.0349778	0.292918
Procr	52.6232	0.282335	0.350011	0.0350476	0.293099
Pacsin2	302.424	0.250928	0.171298	0.0350352	0.293099
Ccnd2	59.2611	-0.23383	0.351902	0.0351015	0.293348
Cd36	1134.22	0.270563	0.203167	0.0353288	0.294641
Palm	24.2472	-0.194243	0.31327	0.0353039	0.294641
Slf2	120.46	-0.28406	0.236392	0.0353215	0.294641
Tmem141	300.235	0.253075	0.174453	0.0354175	0.294829
Ahdc1	24.5837	-0.182531	0.30097	0.0354068	0.294829
Igf2r	218.755	0.29083	0.257453	0.0354515	0.294829
Napg	167.452	0.27269	0.210802	0.0354725	0.294829
Znrd2	157.354	0.274533	0.214651	0.0354664	0.294829
Dab2ip	20.8893	-0.178434	0.296169	0.0356099	0.295769
Bola3	265.182	0.258132	0.184176	0.035699	0.296105
Ifi27	697.634	0.257961	0.182351	0.0356754	0.296105
Creb3l2	66.9301	-0.281163	0.35429	0.0357455	0.296288
Ube2m	727.397	0.251695	0.173386	0.0357849	0.296413
Ep300	274.284	-0.259542	0.187636	0.035811	0.296428
Rapgef1	133.036	0.285114	0.247239	0.035839	0.296457
Slc7a1	46.4766	0.271308	0.36748	0.0359082	0.296828
Ak6	203.035	0.261297	0.189147	0.0360012	0.297395
Mthfsl	253.574	-0.28173	0.238976	0.0360648	0.297516
Egfr	57.5405	-0.224039	0.342314	0.036045	0.297516
0610040J01Rik	30.0564	-0.236463	0.351882	0.0362383	0.298341
Ednra	16.5759	-0.164106	0.279826	0.036221	0.298341
Slc7a8	376.721	0.261526	0.189793	0.0362219	0.298341
Engase	57.0125	-0.270881	0.340403	0.0364014	0.299481
Mcm10	9.5049	0.118951	0.235721	0.0365676	0.300239
Sfn	12.6102	0.139808	0.254974	0.0365263	0.300239
Rogdi	127.721	-0.288541	0.288689	0.0365603	0.300239
Hspa2	78.6526	0.286143	0.298057	0.0365955	0.300266
Ppp1r12b	40.3805	0.27305	0.35138	0.0367549	0.300971
E330020D12Rik	10.0499	0.108899	0.227056	0.0368323	0.300971
Sfpq	735.903	0.249082	0.166562	0.0368794	0.300971
Ctnnbip1	194.861	0.272355	0.21236	0.0368528	0.300971
Bcat2	161.574	0.268485	0.20771	0.0368615	0.300971
Arrdc2	22.135	-0.188768	0.307241	0.0367718	0.300971
Foxc1	6.48368	-0.0794398	0.208478	0.0368152	0.300971
Tbc1d5	234.453	-0.264421	0.200214	0.0367779	0.300971
Ier5	1551.4	-0.238623	0.15868	0.0369076	0.301
Relch	105.976	-0.283345	0.249323	0.0369854	0.301433
Sh3bp4	31.4894	0.232045	0.347585	0.0370873	0.302018
Zbtb34	20.5284	-0.183848	0.301333	0.0371242	0.302018
Osm	730.573	-0.261904	0.19519	0.0371317	0.302018
Slc25a51	209.247	-0.26287	0.196225	0.0371815	0.302221
Zeb2os	323.305	-0.263036	0.199204	0.0372639	0.302487
Ncoa7	196.24	-0.267774	0.210218	0.037243	0.302487
Insr	57.1843	-0.281745	0.316444	0.0373088	0.302649
Gnpda2	58.9187	-0.285598	0.315504	0.0373445	0.302737
Ccn3	56.6963	0.273648	0.354347	0.03738	0.302823
Per2	57.574	0.282323	0.314916	0.0374649	0.302929
Smpd3	23.6189	-0.161145	0.273934	0.0375094	0.302929
Cwf19l2	129.958	-0.281669	0.268857	0.0375359	0.302929
Mmp12	1453.45	0.0902051	0.214557	0.0374947	0.302929
Uba7	148.952	-0.27705	0.238095	0.0375425	0.302929
Pxk	177.115	0.264413	0.2013	0.0374821	0.302929
Gm20513	9.92866	-0.103824	0.223311	0.0376017	0.303206
Cfap126	34.5659	-0.193061	0.307423	0.0377602	0.304282
Mrps14	681.479	0.242257	0.158914	0.0378146	0.304519
2610008E11Rik	16.4531	-0.160087	0.274889	0.0378514	0.304614
Stx4a	586.525	0.237753	0.15895	0.0379725	0.305386
Lig1	96.7338	0.279773	0.251484	0.0380362	0.305696
Ubxn4	517.143	0.234363	0.154893	0.0380692	0.30576
Inka1	41.8625	-0.24947	0.35464	0.0381274	0.305824
B3gntl1	7.09417	-0.0876161	0.212672	0.0381039	0.305824
Gstt2	69.0505	-0.282139	0.296026	0.0382075	0.306264
Fgd4	178.125	-0.264175	0.204488	0.0382464	0.306374
Pinx1	39.9009	0.256948	0.350139	0.0384818	0.308057
Cks1b	58.7996	0.259826	0.354122	0.0386285	0.308935
Enpp4	33.5609	-0.232569	0.339589	0.0386423	0.308935
Sult1a1	57.8573	-0.224387	0.33073	0.0386988	0.308981
Dnajb11	509.137	0.250346	0.178297	0.0386788	0.308981
Shtn1	166.61	0.277827	0.252457	0.0387719	0.309362
Htr2b	87.4837	0.274729	0.336239	0.0388114	0.309392
Snai2	12.8997	-0.114097	0.231457	0.038852	0.309392
Zfp799	7.57098	-0.0954696	0.217548	0.0388499	0.309392
Wdr1	805.581	0.226019	0.146301	0.0388923	0.309511
Dctn3	790.369	0.238116	0.161226	0.0390483	0.310291
Lrrc61	42.1171	-0.233026	0.343923	0.0390498	0.310291
Evi2	56.3482	-0.263175	0.332876	0.0390668	0.310291
Tbx3	7.40618	-0.0930479	0.216089	0.0392603	0.311218
Tsc22d4	836.037	-0.260314	0.201471	0.0392313	0.311218
Mien1	669.945	0.244833	0.171956	0.0392436	0.311218
Mfge8	805.366	0.0815478	0.209384	0.0394042	0.312009
Aph1b	59.289	0.28013	0.307361	0.0394114	0.312009
Eif4ebp1	506.493	0.244477	0.17248	0.0397147	0.314206
Ccdc186	165.848	0.263116	0.207745	0.0397465	0.314253
Tm9sf3	860.201	0.232773	0.156713	0.0398019	0.314487
Smim27	215.901	-0.26537	0.217809	0.0399773	0.315138
E230029C05Rik	73.739	-0.276795	0.292651	0.0399793	0.315138
Ifi30	3931.19	0.228289	0.15097	0.0400138	0.315138
Pgf	14.6554	0.142295	0.256644	0.0400019	0.315138
Timm8a1	113.826	0.27907	0.258671	0.0399696	0.315138
Il10rb	848.248	-0.247876	0.180142	0.0401387	0.315712
Psmb8	1458.05	-0.247795	0.179833	0.0401367	0.315712
Swi5	837.995	0.219167	0.14197	0.0402216	0.31606
Paox	267.684	-0.260701	0.205322	0.0402348	0.31606
Fibin	80.0947	-0.215493	0.328954	0.0403301	0.316235
Golga4	230.878	0.258976	0.201355	0.0402865	0.316235
Csf1r	3683.87	-0.248075	0.18111	0.0403351	0.316235
Map3k14	84.1574	-0.276011	0.261345	0.0403933	0.316488
C3	215.873	0.275185	0.275053	0.0404656	0.316851
Aftph	257.303	-0.250299	0.185964	0.0404947	0.316874
Orc2	83.8053	0.274877	0.25809	0.0407707	0.317134
Meis2	8.00584	-0.0999979	0.220868	0.0406618	0.317134
Hspa12b	5.55913	-0.0791453	0.207686	0.0407945	0.317134
Cd2	9.17924	0.0933294	0.216547	0.0408145	0.317134
Tmcc1	145.249	-0.266342	0.222798	0.0406354	0.317134
Gm26737	19.6993	0.0355654	0.190659	0.0406309	0.317134
Ndfip2	258.143	0.255182	0.192788	0.0407073	0.317134
Eif4g1	502.296	0.236264	0.162337	0.040794	0.317134
Nrip1	223.662	-0.257024	0.197816	0.0407001	0.317134
Pim1	4217.36	-0.228368	0.154527	0.0407203	0.317134
Lims2	5.61422	-0.0825854	0.209922	0.040643	0.317134
Gm7160	40.0308	0.237541	0.335718	0.0409158	0.317718
4833422C13Rik	6.26138	-0.0903366	0.214408	0.0409549	0.317818
Zcrb1	717.633	0.230925	0.155336	0.0410313	0.318209
Dut	98.3986	0.277907	0.285539	0.0410666	0.318252
Ncf4	668.571	0.253498	0.191964	0.0410893	0.318252
Jade2	66.9647	-0.265841	0.313322	0.041142	0.318458
Mindy1	227.194	-0.257795	0.203553	0.0412379	0.318997
Eif2s1	368.374	0.237331	0.165524	0.0413302	0.319305
Eif1a	470.935	-0.247324	0.183496	0.041318	0.319305
Crispld2	12.0968	-0.104128	0.22347	0.0414111	0.319727
Nxpe4	16.0158	-0.150024	0.263281	0.0415229	0.319779
Fbxo22	116.196	0.271094	0.24196	0.0414592	0.319779
Slc5a3	55.4195	0.260225	0.325841	0.041519	0.319779
Epg5	56.4646	0.270234	0.311828	0.0414731	0.319779
Dip2b	336.154	-0.261307	0.217052	0.0416948	0.3209
Bckdha	162.742	-0.26274	0.216604	0.0417688	0.321266
Thra	114.956	-0.26693	0.23359	0.0418129	0.321402
Nop16	61.3959	0.272395	0.295218	0.041973	0.322429
Tma16	75.7968	0.270523	0.275019	0.0421509	0.323591
Gigyf1	116.746	-0.267183	0.235159	0.0422302	0.323996
C1qbp	355.434	0.238615	0.169505	0.0423894	0.324399
Bmp1	76.4173	-0.218368	0.326367	0.0423373	0.324399
Mtss1	659.801	0.220069	0.144666	0.0423874	0.324399
Peg13	41.2361	-0.247726	0.328446	0.0423687	0.324399
Tbl1xr1	171.665	-0.260586	0.216728	0.0424361	0.324552
Tshz2	41.0058	-0.192837	0.302319	0.0424903	0.324762
Bop1	81.2302	0.271318	0.260941	0.0426376	0.325684
Clec2d	170.555	-0.140401	0.252858	0.0426734	0.325753
Gm47754	58.0415	-0.219173	0.322437	0.0427332	0.326004
Glb1l	25.3854	0.200914	0.309804	0.042989	0.327586
Ndufs5	1020.57	0.235883	0.166846	0.0430212	0.327586
Gpr183	420.062	0.231021	0.159946	0.0429945	0.327586
Ndufb6	486.492	0.237266	0.169581	0.0432014	0.328752
AI662270	412.285	0.233797	0.164741	0.0433742	0.329861
Cgas	43.5869	-0.234345	0.32153	0.0434707	0.330388
Itgb1	1645.33	0.228216	0.157214	0.0436163	0.331288
Hcst	426.828	-0.260714	0.228714	0.0437413	0.33203
Thap11	75.463	-0.267777	0.289002	0.0438109	0.332351
Abce1	134.053	0.260466	0.221484	0.0438599	0.332515
Ifnar2	1312.56	-0.233303	0.166994	0.0439741	0.333174
Rps21	14739.9	-0.231805	0.166521	0.0440592	0.333611
BC049352	23.2951	-0.15402	0.264609	0.0442328	0.334509
Gm48226	25.7024	0.198382	0.306044	0.0442145	0.334509
Fdx1	142.244	0.261738	0.2301	0.0442946	0.334768
Serpina3f	5.94465	-0.0728192	0.204098	0.0443503	0.334981
Acox3	212.01	-0.25176	0.199278	0.0444077	0.334999
Nox4	19.5374	-0.152263	0.263903	0.0443892	0.334999
Fam110a	130.172	0.264617	0.245485	0.0445329	0.335527
Nanos1	10.7039	0.0942681	0.216929	0.0445299	0.335527
Creg2	46.7814	0.255276	0.315811	0.0446293	0.335838
Rassf8	84.6126	0.268176	0.27291	0.0446228	0.335838
C5ar2	76.7003	-0.262871	0.286067	0.0448565	0.337195
P3h2	8.57722	-0.102738	0.22213	0.0448652	0.337195
Myo7a	90.6651	0.264195	0.252475	0.044953	0.337647
Gm11772	6.11648	-0.0852368	0.211107	0.0451401	0.338843
Fbxw11	348.636	0.248028	0.195887	0.0452217	0.339247
Mfap1b	93.1936	-0.256591	0.265132	0.0452937	0.339577
Sema5a	22.8758	-0.153308	0.263543	0.0453433	0.33974
C130050O18Rik	38.2819	-0.229859	0.319151	0.0454382	0.340241
Flt3l	24.6923	-0.166987	0.27508	0.0454688	0.340261
Safb2	325.529	0.235305	0.171899	0.045717	0.341908
Idh1	488.903	-0.235894	0.174443	0.0458729	0.342639
Mthfr	52.7229	-0.250644	0.305235	0.0459273	0.342639
Chst11	39.6859	0.208701	0.315572	0.0458929	0.342639
Diaph1	542.957	0.219814	0.149803	0.0459219	0.342639
Isy1	158.979	-0.257234	0.232178	0.0461503	0.34377
Mbd4	24.9627	-0.172446	0.279755	0.0461355	0.34377
Ska2	13.1426	-0.131292	0.243804	0.0461637	0.34377
Srp14	1379.94	0.21826	0.147983	0.046203	0.34379
Mtmr12	143.243	0.252407	0.210229	0.046223	0.34379
Arhgef25	39.2152	-0.219234	0.318823	0.0462651	0.343894
Ebf3	16.6937	-0.141966	0.254203	0.0463489	0.344306
Hif1a	600.707	0.245561	0.193824	0.0464944	0.345176
Commd6	357.981	0.227953	0.162323	0.0466445	0.34608
C77080	60.5209	0.243923	0.316899	0.0467012	0.346289
Prrx1	70.7028	-0.215943	0.314833	0.0467778	0.346349
Hsd17b7	15.6621	0.139607	0.250944	0.046825	0.346349
Ddr2	29.6477	-0.181075	0.289465	0.0470957	0.346349
Gtf3c5	36.3615	0.22078	0.315925	0.0469855	0.346349
Siglec1	125.813	-0.257719	0.25753	0.0470454	0.346349
BC028528	287.098	-0.233144	0.174595	0.0468524	0.346349
Wwp1	955.782	-0.255242	0.237041	0.0469542	0.346349
Ybx1	5101.65	0.202884	0.131511	0.0471078	0.346349
Mrpl34	512.034	0.232019	0.168677	0.0469155	0.346349
Gadd45gip1	224.313	0.242923	0.19009	0.046813	0.346349
Ip6k2	29.4114	-0.202771	0.305188	0.0470556	0.346349
Ubald2	538.622	-0.232558	0.172282	0.0470973	0.346349
Pfdn6	326.524	0.238495	0.180836	0.0468385	0.346349
Tmem63b	102.052	0.260942	0.250866	0.047068	0.346349
Siglech	8.35953	-0.0970909	0.218193	0.0471956	0.346646
Arf2	216.167	0.246171	0.197887	0.0472051	0.346646
Maf	1832.12	-0.241181	0.19082	0.0474297	0.347875
Ms4a6b	1373.4	-0.212755	0.143819	0.0474218	0.347875
Calm1	7863.37	0.211617	0.141277	0.0475694	0.34869
H2-T24	29.5711	-0.1693	0.275408	0.0476348	0.348959
Ccdc106	16.9666	0.116981	0.231347	0.0476975	0.349152
Acot2	45.0195	-0.241326	0.30908	0.0477186	0.349152
Tril	15.0635	-0.112456	0.229022	0.0477874	0.349236
Gtf2h5	609.687	0.22058	0.153535	0.0477594	0.349236
Cmtm4	63.3295	0.254762	0.288686	0.0478418	0.349423
Gm20219	9.40696	0.109439	0.226377	0.0479032	0.349662
Pkp4	91.6508	0.257092	0.248846	0.0481813	0.351481
Nudt16	60.1013	-0.250038	0.287887	0.0482492	0.351555
Bicd2	140.689	0.249401	0.211685	0.0482314	0.351555
Zfp217	64.0751	-0.234985	0.302753	0.0482916	0.351651
Parvb	177.377	0.243982	0.196122	0.0483202	0.351651
Nectin4	34.4538	-0.201183	0.299633	0.0484498	0.351962
Ahnak	4164.55	0.234768	0.177062	0.0484077	0.351962
Kantr	19.9056	-0.149704	0.258553	0.0484299	0.351962
Gprc5a	11.8028	-0.121127	0.235084	0.0485198	0.35226
Sdf4	798.512	-0.230019	0.171003	0.0486642	0.353098
Uqcc2	671.199	0.230398	0.170394	0.0487172	0.353272
Elf4	128.297	-0.250507	0.22168	0.0489253	0.35457
Ccnd1	225.351	0.252747	0.273285	0.0490412	0.354776
Aggf1	155.753	0.247635	0.210313	0.0490277	0.354776
Gstp1	90.8199	-0.202566	0.299442	0.0489865	0.354776
Nab2	95.7339	-0.255295	0.249675	0.0491355	0.355247
Ywhae	2026.31	0.202119	0.132615	0.0492455	0.355831
Fxyd1	33.8208	-0.198735	0.29977	0.0493649	0.356482
Stab1	2101.27	0.225993	0.164842	0.0494781	0.356535
Cdkn3	14.3978	0.127786	0.240824	0.0494673	0.356535
Usp16	233.604	0.243459	0.198544	0.0494894	0.356535
Rps6ka2	29.3586	0.198839	0.300379	0.0494712	0.356535
Dnajc11	88.114	0.253818	0.264548	0.0495266	0.356592
Spred1	354.978	0.243337	0.198673	0.0495891	0.35674
Entpd6	30.0847	-0.203327	0.303597	0.0496059	0.35674
Tlcd2	30.0807	-0.19553	0.296502	0.0497866	0.357829
Nucks1	611.693	0.228053	0.168203	0.0498613	0.358154
Fbxo7	72.2708	-0.250163	0.273971	0.050018	0.359068
Dysf	6.14746	-0.0706715	0.203278	0.0500744	0.359099
Psmd6	400.242	0.220439	0.156473	0.0500814	0.359099
Tnfaip8l2	566.444	-0.228751	0.172586	0.0502909	0.360388
Sptan1	311.735	0.234994	0.184602	0.0505176	0.360526
Lrrc8a	98.2535	-0.252553	0.245387	0.0505028	0.360526
Tusc1	99.5137	-0.253017	0.252506	0.050501	0.360526
Ndufa4l2	51.483	0.21526	0.306232	0.0504029	0.360526
Scfd1	168.939	0.242561	0.202644	0.0504235	0.360526
Tgif1	881.807	-0.214285	0.148999	0.0504467	0.360526
Pdcd4	260.649	-0.247769	0.229746	0.0504815	0.360526
Prkcsh	304.636	0.232507	0.176921	0.050579	0.360753
Wnt11	10.0576	-0.107823	0.224958	0.0507182	0.361346
Fli1	341.155	-0.234377	0.184524	0.0507214	0.361346
Irf2bpl	158.909	-0.25215	0.268669	0.0507545	0.36137
Cnn2	322.189	0.24668	0.212185	0.0508501	0.361839
Cytip	610.251	-0.145923	0.25531	0.0510936	0.362919
Arfgap2	183.89	0.237343	0.189891	0.0511607	0.362919
Ehd4	1655.67	-0.229743	0.164673	0.0511809	0.362919
Cnbd2	11.3554	-0.111059	0.226809	0.0511073	0.362919
Zfand2a	416.675	-0.228037	0.174195	0.0511618	0.362919
Mrps10	122.768	0.249774	0.225071	0.0511248	0.362919
Ctdsp1	236.7	-0.242004	0.206053	0.0512212	0.362994
St3gal6	63.0623	-0.190978	0.29042	0.0512745	0.363159
Rps28	19695	-0.22464	0.164553	0.0513615	0.363564
Cep290	84.2443	0.248589	0.251031	0.0514735	0.364145
Tor1aip1	691.416	-0.215761	0.153793	0.0516345	0.364341
Clspn	17.7385	0.150793	0.259004	0.0516362	0.364341
Hsbp1	993.044	0.225176	0.168568	0.0516809	0.364341
Lyz2	84800.1	-0.225482	0.169317	0.0516517	0.364341
Dnah2	8.93745	-0.0999371	0.219497	0.0516393	0.364341
Sgsm2	24.4308	-0.173565	0.278389	0.0515851	0.364341
Fam50a	339.178	0.226338	0.17043	0.0517339	0.364504
Arhgap21	89.6906	0.249583	0.243742	0.0518566	0.364734
Stk40	239.043	0.236244	0.190893	0.0518556	0.364734
Tomm40	170.964	0.241627	0.204084	0.0518179	0.364734
Eng	101.613	-0.249186	0.254362	0.0520369	0.365791
Zfp958	10.8208	-0.108678	0.225502	0.0520949	0.365988
Sept11	219.005	0.249123	0.22927	0.0522091	0.366399
Hlcs	28.8906	-0.197365	0.295986	0.0522437	0.366399
Nrap	19.1286	0.1465	0.254332	0.0522337	0.366399
Vmac	24.9091	-0.173356	0.277038	0.0523122	0.366668
Pgap1	82.2805	-0.243388	0.270461	0.0525369	0.366815
Ripk2	72.8393	0.247887	0.25899	0.0525126	0.366815
Pgm2l1	75.4405	0.237522	0.281957	0.0525394	0.366815
Ppp1r3b	24.7169	-0.170587	0.2741	0.0525178	0.366815
Psmd2	480.467	0.221432	0.16179	0.0524665	0.366815
Gabbr1	13.3229	-0.125163	0.237532	0.0525443	0.366815
Zfp36l2	1240.4	-0.213717	0.151818	0.0523805	0.366815
Stard5	88.2858	-0.245629	0.25792	0.0527041	0.367509
Zfp87	55.0158	-0.223487	0.294974	0.0526763	0.367509
Ptgs1	104.061	-0.247922	0.265615	0.0528687	0.36842
Dph6	48.994	0.235817	0.293147	0.0529034	0.36842
Dzip1	7.57184	-0.0909098	0.21358	0.0529256	0.36842
Ccsap	13.5089	0.120323	0.233744	0.0530049	0.368761
Cdpf1	114.373	0.246606	0.236321	0.0531813	0.369777
Trp53i11	6.59119	-0.0746548	0.204494	0.0533018	0.369981
Tarsl2	17.7343	0.149592	0.256782	0.0532744	0.369981
Klf9	156.121	-0.24686	0.25096	0.0532788	0.369981
Foxp4	52.4766	0.218887	0.299932	0.0533745	0.370274
Ikzf1	222.57	-0.231134	0.185529	0.0535752	0.371455
Por	483.939	0.217877	0.158702	0.0537079	0.372163
Psmd11	357.172	0.221128	0.164083	0.0537784	0.372439
Itpa	110.393	0.244331	0.230507	0.0539571	0.373378
Rnf114	233.296	-0.230351	0.185787	0.0542894	0.373378
Ccnl1	2321.11	0.210282	0.148222	0.0542108	0.373378
Slc39a1	492.434	-0.22068	0.16493	0.0540397	0.373378
Scarb2	812.944	-0.219477	0.169401	0.0542836	0.373378
Kmt5a	238.673	0.227974	0.179529	0.0543443	0.373378
Pkib	319.596	-0.236787	0.200492	0.0543742	0.373378
Rhbdf2	179.041	0.242383	0.214852	0.0541284	0.373378
Dph3	487.704	0.221027	0.165212	0.0543238	0.373378
Ang	249.593	-0.236232	0.198392	0.054041	0.373378
Cyth4	932.527	-0.213916	0.154811	0.0541717	0.373378
Krt80	30.303	-0.168115	0.270788	0.0542328	0.373378
Cd47	1760.66	-0.197036	0.132418	0.0540294	0.373378
Nedd4l	113.644	0.24515	0.235847	0.0541389	0.373378
Abcd1	159.703	-0.240149	0.214963	0.054149	0.373378
Serpina3g	14.0456	-0.112851	0.227883	0.0544395	0.373405
Hhex	71.0969	-0.234064	0.279455	0.0544143	0.373405
D1Ertd622e	143.532	0.237505	0.202943	0.0545396	0.37367
Ptp4a3	90.6611	-0.24301	0.248259	0.0545252	0.37367
Faf1	141.353	0.238369	0.206854	0.0545792	0.373731
Gm30025	26.3196	-0.158369	0.263859	0.0547574	0.37474
Mthfd2l	67.3656	0.236393	0.279763	0.054792	0.374766
Idua	98.543	-0.241693	0.25627	0.0548693	0.374873
Tnfrsf17	16.9961	-0.130534	0.240355	0.0548522	0.374873
Ccdc71l	179.902	0.236271	0.199604	0.0549885	0.375477
Slc30a1	115.568	-0.240492	0.221944	0.0550986	0.375622
Tek	5.77313	-0.0745638	0.204655	0.0550782	0.375622
Cox8b	9.48192	-0.0983006	0.217873	0.0551023	0.375622
Cyb5b	148.9	0.24074	0.216972	0.0552334	0.376094
Il10ra	426.908	-0.216143	0.16124	0.0552166	0.376094
Gnai3	315.417	0.226401	0.178721	0.0553602	0.376747
Zfp266	40.5087	-0.197405	0.290092	0.055401	0.376813
4921531C22Rik	88.2817	0.239097	0.255581	0.0555687	0.377743
Lonrf1	57.4236	0.236485	0.279177	0.0557163	0.378535
Kcnab2	122.961	0.239182	0.217706	0.0557921	0.378838
Srsf2	785.922	0.220088	0.166557	0.0558509	0.379026
Osbpl8	716.214	0.210714	0.152153	0.0559329	0.379371
Mpc1	1377.12	0.21286	0.154331	0.0561596	0.380696
Ptgr1	101.242	0.23916	0.24511	0.0563496	0.381347
Smim14	689.665	-0.21986	0.169818	0.0563023	0.381347
Mcam	23.2509	-0.154284	0.260315	0.0563336	0.381347
Lonp1	104.507	0.240673	0.230103	0.0564283	0.381667
Zfp930	10.2572	-0.109023	0.225058	0.0565304	0.382145
1810037I17Rik	937.647	0.211661	0.155192	0.056772	0.383566
Pdia3	1980.83	0.211984	0.155663	0.0568784	0.383858
Trim14	29.2455	-0.146082	0.252076	0.0568759	0.383858
Klf10	331.637	-0.222205	0.175027	0.0570288	0.38466
Aurkaip1	689.041	0.214733	0.156633	0.0571158	0.385034
D5Ertd579e	123.16	-0.237938	0.22271	0.0572415	0.385667
Olfml2a	8.40717	-0.0914665	0.213728	0.0572902	0.385782
Vps39	110.345	-0.237026	0.233822	0.0574123	0.386041
Impdh1	82.7562	0.238262	0.256374	0.0573669	0.386041
Rnaseh2c	485.572	0.21208	0.156157	0.0574239	0.386041
Lysmd4	7.12706	-0.0842754	0.209392	0.0574804	0.386207
Armcx6	32.8819	0.199469	0.286975	0.05752	0.38626
Snapc1	93.7428	-0.237225	0.243179	0.0575868	0.386495
Ackr3	9.52332	-0.0897366	0.212863	0.0576986	0.387032
Tcea3	26.0208	-0.175255	0.274787	0.0578639	0.3875
Isoc2a	35.6519	-0.17249	0.271059	0.0578426	0.3875
Wnt5a	6.93977	-0.0777149	0.206378	0.0578524	0.3875
Sh3d19	32.5416	-0.183996	0.281042	0.0580128	0.388283
Arid4a	317.458	-0.226763	0.189897	0.0580996	0.388651
Gm37696	6.87922	0.075941	0.205152	0.0581472	0.388756
Isg20	37.8788	-0.176643	0.27366	0.0582245	0.388845
Smarca4	351.186	0.222105	0.175447	0.058207	0.388845
Zfp780b	15.5282	-0.112277	0.226156	0.0583742	0.389525
Crtam	5.39888	0.0662689	0.200861	0.0583903	0.389525
Scai	19.2483	-0.150718	0.256095	0.0585403	0.390256
Hist1h4d	41.8068	-0.196054	0.282298	0.0585717	0.390256
Pot1b	42.9174	-0.200791	0.283538	0.0585961	0.390256
Med17	90.759	-0.234693	0.24499	0.0587239	0.390772
Actn1	282.59	0.237844	0.251656	0.05877	0.390772
Rab11b	481.906	-0.21303	0.161788	0.0587509	0.390772
Tstd2	66.4883	-0.222925	0.274055	0.0588823	0.391305
Rhoj	70.3619	-0.186796	0.281079	0.0589838	0.391552
Plxnb3	8.11407	-0.082915	0.208447	0.0589549	0.391552
Atp6v0a1	544.994	0.217074	0.168174	0.0590462	0.391752
Ctss	15268.3	-0.212349	0.163824	0.0591377	0.391841
Cabin1	134.495	-0.232934	0.216321	0.0591562	0.391841
Foxred2	15.3614	-0.127526	0.237522	0.0591348	0.391841
Megf10	6.05064	-0.0716051	0.203219	0.0592887	0.392505
Abca1	2213.31	-0.206907	0.152291	0.0594505	0.39315
Coa3	516.029	0.207894	0.155352	0.0594507	0.39315
Prdx2	1386.78	0.207374	0.152145	0.0595047	0.393293
Rab5b	173.419	-0.229774	0.200041	0.0595489	0.393372
Rnf167	105.118	-0.236023	0.242317	0.0596098	0.393561
Setd1b	124.085	-0.231757	0.21228	0.0596861	0.393776
Eif2ak2	129.144	-0.23248	0.22603	0.0597071	0.393776
Fam177a	58.2431	0.209032	0.281806	0.0597718	0.393882
Spin1	137.113	-0.231479	0.207583	0.059788	0.393882
Mrto4	163.144	0.23512	0.227172	0.0598904	0.39413
Usb1	55.2598	-0.222007	0.275514	0.0598654	0.39413
Tgfbr2	742.418	-0.207018	0.152936	0.0599664	0.394417
Man1c1	459.835	-0.212242	0.162308	0.0600434	0.394651
2810457G06Rik	7.33601	-0.086564	0.210571	0.0600669	0.394651
1810026B05Rik	156.417	-0.232161	0.222513	0.0601557	0.394859
Prep	77.0015	0.232223	0.256842	0.0601634	0.394859
Etnk1	125.978	-0.232224	0.21674	0.0604182	0.39504
Prr12	60.3303	-0.226081	0.271346	0.0603118	0.39504
Kat6a	220.484	-0.226382	0.19707	0.0603412	0.39504
Sept10	26.8385	-0.164363	0.264723	0.0604149	0.39504
Birc5	52.5724	0.185476	0.279417	0.0604117	0.39504
2510009E07Rik	148.523	0.234341	0.22247	0.0602802	0.39504
Afap1l1	14.371	-0.127337	0.23751	0.0602958	0.39504
Agps	155.051	0.229139	0.206355	0.0605833	0.395906
Pip4k2a	629.042	-0.206752	0.15454	0.0606936	0.396129
Gmpr	56.0658	0.226478	0.270473	0.0607151	0.396129
Ero1l	113.52	0.232191	0.218288	0.0606817	0.396129
Riok3	563.506	0.20722	0.154521	0.0608236	0.396625
Hopx	43.3253	-0.192863	0.280883	0.0608935	0.396868
Rere	153.177	-0.228269	0.200956	0.0609411	0.396966
Klhl13	17.6234	-0.124333	0.235374	0.0610102	0.397203
5031425E22Rik	181.735	-0.228697	0.212158	0.0611552	0.397721
Slc45a4	210.385	-0.222422	0.186805	0.0611397	0.397721
Ndufc1	1077.28	0.215608	0.16759	0.0612375	0.39777
Tob2	662.988	-0.211783	0.163372	0.0612608	0.39777
Armcx2	22.0147	-0.121416	0.233662	0.0612541	0.39777
Cpt1c	12.345	-0.114985	0.228573	0.0613052	0.397846
B930036N10Rik	450.513	0.226308	0.196256	0.0613763	0.397946
Itga9	274.259	0.222544	0.185824	0.0613859	0.397946
Phf23	187.666	-0.227479	0.20827	0.0615335	0.39869
Tnfrsf21	240.438	-0.227339	0.199855	0.0615818	0.39879
AW549877	97.1619	-0.229862	0.244087	0.0616712	0.399157
Aars	117.628	0.229881	0.213804	0.0617899	0.3995
Zfp426	19.217	-0.144559	0.249514	0.0617572	0.3995
Samsn1	290.21	-0.226003	0.202579	0.061827	0.399528
Ncoa2	120.891	-0.230709	0.227731	0.0619559	0.399936
Arhgap18	351.548	-0.218601	0.179606	0.0619395	0.399936
Ufsp2	238.816	0.226833	0.201377	0.0620323	0.400105
Dand5	31.1373	0.183039	0.273632	0.0620479	0.400105
Rab20	1014.84	-0.225571	0.20132	0.0620879	0.400151
Nlrp3	1386.44	0.226605	0.201997	0.0621633	0.400425
Gbe1	38.6394	0.198768	0.282819	0.0622422	0.400721
Zfp235	10.6802	-0.105747	0.222105	0.0624995	0.402165
Scarf1	35.5926	-0.168259	0.263972	0.0625886	0.402526
Pld3	2253.23	-0.214068	0.171437	0.0626383	0.402632
Cdk14	112.45	0.228693	0.25566	0.0627124	0.402724
Adcy7	275.03	-0.215288	0.173822	0.0627814	0.402724
Slc7a5	34.2211	0.167393	0.264546	0.0627849	0.402724
Mrpl57	409.536	0.221345	0.186158	0.0627827	0.402724
Igfbp3	33.7236	-0.13412	0.242079	0.0628637	0.403017
Zfp354c	15.0051	-0.123033	0.233719	0.0629504	0.40336
Des	105.287	0.2232	0.263369	0.0632978	0.403448
Uap1l1	702.75	0.220782	0.185348	0.063076	0.403448
Bcl2l1	184.386	0.22982	0.217613	0.0632764	0.403448
Supt20	144.195	-0.225491	0.206533	0.0631765	0.403448
Akirin1	536.542	0.202933	0.150602	0.0630013	0.403448
Vrk3	123.153	-0.228061	0.218303	0.0632698	0.403448
Tbx18	5.91759	-0.0642895	0.199739	0.0630469	0.403448
Pik3ip1	11.8069	-0.103477	0.220249	0.0633288	0.403448
Cdc42ep4	99.7753	0.228252	0.236682	0.0631657	0.403448
Ncapg2	173.279	0.226132	0.205727	0.0632923	0.403448
Reep5	2111.16	0.19655	0.140268	0.0631629	0.403448
Mcm6	114.999	0.229092	0.228344	0.0633866	0.403475
Tmem126a	368.105	0.216918	0.174894	0.0633995	0.403475
Gpr176	24.0531	-0.130087	0.239369	0.0635912	0.404431
Anp32e	279.452	0.21616	0.176379	0.0637684	0.404431
Casp6	74.4523	-0.225153	0.254407	0.0642232	0.404431
Gsap	109.559	0.228645	0.223989	0.0639183	0.404431
Sh2b3	198.437	-0.222376	0.194698	0.0642387	0.404431
Pot1a	38.9709	-0.199627	0.278224	0.0638679	0.404431
Mkrn1	739.316	0.203092	0.151878	0.0642477	0.404431
Gm43936	9.49185	-0.0990066	0.217527	0.063852	0.404431
Snrnp70	556.89	0.210557	0.16344	0.0638095	0.404431
Taok2	78.5657	-0.226085	0.244593	0.064212	0.404431
Jund	6304.24	-0.212449	0.171	0.0640877	0.404431
Slc41a2	60.2884	0.213417	0.277716	0.0639976	0.404431
Stx8	418.83	0.20839	0.161015	0.0642473	0.404431
A930037H05Rik	12.1804	-0.107407	0.223044	0.0640734	0.404431
Fancm	21.4496	0.13785	0.24429	0.0639122	0.404431
Gm10425	5.75872	0.0700072	0.202047	0.0638361	0.404431
Gcnt2	71.9564	-0.219481	0.269806	0.0641408	0.404431
Pck2	84.2259	-0.226107	0.252093	0.06393	0.404431
Tcp1	620.12	0.211139	0.165236	0.0636914	0.404431
Cuta	639.409	0.203602	0.152906	0.0639633	0.404431
Mrpl43	436.867	0.214916	0.172443	0.0636656	0.404431
Tsacc	19.7012	-0.12893	0.237339	0.0643603	0.404809
Mrps15	419.239	0.208877	0.16268	0.0645026	0.404809
Evc2	6.58143	-0.0793385	0.206612	0.0644538	0.404809
Sobp	12.2955	-0.102472	0.220033	0.0645405	0.404809
Mrpl18	434.361	0.204561	0.154807	0.0645268	0.404809
Nrg2	5.48907	-0.0718921	0.202952	0.0645206	0.404809
Lrch2	5.93955	-0.0747255	0.204398	0.0644872	0.404809
Hck	451.833	-0.221622	0.195293	0.0646718	0.40492
Cc2d1b	106.545	0.226931	0.233067	0.0647282	0.40492
Tmem221	32.9702	-0.18277	0.272123	0.0647696	0.40492
Dhps	202.302	0.222378	0.194949	0.0646679	0.40492
Gm16104	43.8939	0.1815	0.269998	0.0647911	0.40492
Grk2	686.257	-0.202956	0.154242	0.0646534	0.40492
Gm5244	22.3362	0.149683	0.252536	0.0647333	0.40492
Rmc1	64.6245	0.221442	0.25782	0.0648635	0.404956
Ccbe1	22.1684	-0.11948	0.23139	0.0648347	0.404956
Slc50a1	227.295	-0.215737	0.179134	0.0649988	0.404969
Arid1a	308.14	-0.214956	0.172134	0.0649606	0.404969
Dpy19l1	92.0437	-0.227568	0.233621	0.0649348	0.404969
Lilrb4a	1413.45	0.20291	0.153285	0.0649861	0.404969
Nol4l	44.2432	0.141764	0.247708	0.0650812	0.405275
Ccl7	2321.39	0.149142	0.253623	0.0652165	0.40591
Tmem79	5.74674	-0.0638056	0.199188	0.0653025	0.406237
Rbak	11.8689	-0.109251	0.223642	0.0653731	0.406469
Retreg1	177.412	-0.225066	0.218067	0.0654397	0.406675
Zfp445	82.4808	-0.217628	0.255958	0.0655164	0.406944
Noct	268.109	0.226999	0.215506	0.0657772	0.407399
Smg5	75.0532	0.223067	0.249331	0.0656576	0.407399
Dram2	262.232	-0.213016	0.174229	0.0657325	0.407399
Kti12	36.4714	0.193134	0.2763	0.0656357	0.407399
Hsd17b11	414.129	-0.209308	0.168379	0.0657905	0.407399
Gm12216	24.5704	-0.156666	0.257194	0.0656978	0.407399
Pde7b	24.1687	-0.138944	0.243288	0.0658389	0.407491
Tbxas1	340.718	-0.213088	0.179641	0.0660303	0.408053
Arsg	24.396	-0.155059	0.256032	0.0660133	0.408053
Marf1	98.2908	-0.222814	0.241544	0.0660172	0.408053
Mphosph10	148.883	0.22099	0.200416	0.0662234	0.408831
Nln	93.5016	0.225375	0.228689	0.0662131	0.408831
Slc37a2	461.283	-0.220409	0.185693	0.0663308	0.409079
Hmgn5	121.185	0.223423	0.232376	0.066323	0.409079
Ncl	2436.18	0.205614	0.158394	0.0665546	0.409889
S100a1	686.772	0.204847	0.154746	0.0664969	0.409889
Cyren	103.516	0.222355	0.236244	0.0665996	0.409889
Rab3a	12.7603	-0.114352	0.226859	0.0666305	0.409889
Pycr1	7.17869	-0.082325	0.207993	0.0665679	0.409889
Tjp1	20.0196	-0.119027	0.230388	0.0667015	0.410118
1110008P14Rik	239.235	0.221555	0.200374	0.0668004	0.410519
Cd52	5758.92	-0.215694	0.187136	0.0669018	0.410935
Per1	305.253	-0.206617	0.164145	0.067018	0.41144
Pla2g12a	82.1906	0.22171	0.252878	0.0671735	0.411455
Nans	231.228	0.213542	0.176987	0.0671243	0.411455
Tm6sf1	534.247	-0.197337	0.149029	0.0671179	0.411455
Myo6	15.5228	-0.117493	0.228855	0.0672233	0.411455
Bsg	1614.07	0.198636	0.148342	0.0671255	0.411455
Tbc1d30	14.7512	0.109763	0.223405	0.0672137	0.411455
Mtln	410.648	0.209045	0.169563	0.0674326	0.411598
Rrm1	90.2053	0.222895	0.247368	0.0673772	0.411598
Znrf1	215.015	0.221487	0.200288	0.067375	0.411598
Lsm12	550.151	0.197508	0.147987	0.0674242	0.411598
Nid2	42.8394	-0.190151	0.269919	0.0673036	0.411598
Tap2	177.455	-0.222957	0.22753	0.0674495	0.411598
Camk1	993.549	0.205814	0.162836	0.0675576	0.411638
Zfp90	86.8654	-0.206687	0.263427	0.0674996	0.411638
Mmrn2	7.32325	-0.0792927	0.206359	0.0675375	0.411638
Sirt3	45.5488	-0.203933	0.2703	0.0677304	0.412484
Adnp2	27.2336	-0.158668	0.257488	0.0678305	0.412887
[truncated: 12,743 more rows]
