# Supplementary material for: Single-Cell Transcriptomics Highlights Macrophage-Driven Regulation of EndMT and Repair in Injured Muscle
Source: Research Square preprint supplement (doi:10.21203/rs.3.rs-6288736/v1), 2025-04-24
Supplement: Supplementary file 7 [file ee70d3615b75d23b90ea1bf2.xlsx]

## Sheet: Sheet1
gene	baseMean	log2FoldChange	lfcSE	pvalue	padj
Zim1	598.473	-3.05236	0.157524	5.57804e-85	9.17309e-81
Ccl2	9221.87	2.26963	0.13016	1.97415e-69	1.62324e-65
Esam	178.744	-4.76689	0.28796	4.3661e-63	2.39335e-59
Ndufa4l2	4547.27	2.60465	0.160879	4.13026e-60	1.69805e-56
Ltbp2	2893.31	1.80078	0.114446	6.76183e-57	2.22396e-53
Kcnk1	358.075	3.46368	0.221415	4.22667e-56	1.15846e-52
Abca8a	1862.23	-2.40371	0.159911	2.78428e-52	6.54107e-49
Emcn	123.893	-4.97867	0.340859	1.48215e-49	2.98552e-46
Tpi1	4646.37	1.63123	0.111412	1.63391e-49	2.98552e-46
Slc16a3	802.248	3.21316	0.221162	1.1259e-48	1.85154e-45
Col6a6	344.851	-3.00319	0.210313	1.53129e-47	2.28928e-44
Mif	9165.18	1.98911	0.139395	2.53251e-47	3.4706e-44
Tspan13	145.867	-3.98642	0.287122	2.68761e-45	3.39983e-42
Aqp1	241.25	-2.71565	0.19761	3.50089e-44	4.1123e-41
Col8a1	12887.9	1.7674	0.128984	7.84522e-44	8.60097e-41
Timp1	9344.21	1.8342	0.135145	4.17104e-43	4.28705e-40
Higd1a	4103.56	2.06184	0.15222	4.48083e-43	4.33454e-40
Pkm	5741.82	1.58292	0.117163	1.13782e-42	1.03952e-39
Gapdh	15130.8	1.37913	0.101772	1.35863e-42	1.17593e-39
Egfl7	418.357	-2.51237	0.193218	6.27323e-40	5.15816e-37
Tcf15	126.313	-3.88381	0.300667	1.20346e-39	9.42428e-37
Peg3	4383.85	-1.4561	0.112206	1.28823e-39	9.62951e-37
Abca8b	482.825	-2.06286	0.159362	1.50919e-39	1.07907e-36
Kdr	144.207	-3.58018	0.277567	2.08621e-39	1.42949e-36
Pgam1	4292.85	1.63059	0.12778	2.3942e-38	1.5749e-35
Abca1	752.524	-1.79365	0.141188	4.42318e-38	2.79766e-35
Fam162a	3899.94	1.99957	0.160879	1.3373e-36	8.14515e-34
Ldha	7128.81	1.58971	0.129136	6.3475e-36	3.72802e-33
Plpp3	2850.16	-1.37335	0.112343	2.005e-35	1.13697e-32
Cldn5	87.722	-4.62914	0.383612	9.32272e-35	5.11041e-32
Gdf10	256.411	-2.47561	0.20708	4.35063e-34	2.30794e-31
Lox	13357	1.53952	0.128813	5.6719e-34	2.91482e-31
Pfkl	617.381	1.85783	0.156932	2.11809e-33	1.05551e-30
Hmcn2	563.231	-2.81514	0.240704	7.53911e-33	3.64649e-30
Clec1a	97.9971	-3.31825	0.28511	1.39248e-32	6.54266e-30
Pgk1	4748.81	1.97603	0.172122	1.223e-31	5.58672e-29
Fdps	869.667	2.30729	0.201471	2.05553e-31	9.13601e-29
Phactr2	1108.6	-1.64444	0.14497	5.61193e-31	2.42864e-28
Col18a1	1116.82	-1.75393	0.154871	6.70977e-31	2.82929e-28
Selenop	4361.13	-1.29764	0.116319	6.4923e-30	2.66915e-27
Aldoa	6598.9	1.25571	0.112414	6.96794e-30	2.79483e-27
Ifitm10	243.555	2.56	0.23171	1.17581e-29	4.60387e-27
Cdkn1c	13985.2	-1.83245	0.16603	1.8966e-29	7.25341e-27
Tinagl1	132.19	-3.75837	0.343848	2.72155e-29	1.01137e-26
Peg10	899.675	-1.91217	0.174107	2.80959e-29	1.01137e-26
Adgrf5	118.669	-3.48422	0.318208	2.829e-29	1.01137e-26
Cthrc1	24577.7	1.30656	0.119313	6.0768e-29	2.12623e-26
Eno1	3599.8	2.05758	0.188972	6.78507e-29	2.32459e-26
Plagl1	4818.41	-1.57375	0.144903	1.41581e-28	4.75164e-26
Tnfrsf12a	1908.31	1.57774	0.146678	4.38124e-28	1.44099e-25
Cd9	3920.81	-1.11949	0.103692	4.49912e-28	1.45075e-25
Dio3	258.045	2.92637	0.277077	2.56944e-27	8.12584e-25
Cyp51	512.975	1.94721	0.183409	2.78056e-27	8.62761e-25
Tubb3	249.587	2.43899	0.230555	4.19438e-27	1.27734e-24
Ablim1	310.047	-1.72007	0.163869	6.49846e-27	1.94304e-24
Gimap4	54.3786	-5.27421	0.503448	6.92059e-27	2.03231e-24
Pdgfb	94.6811	-3.63226	0.354409	5.15099e-26	1.4861e-23
P4ha2	2509.46	1.36314	0.1328	7.08412e-26	1.98285e-23
Apod	4903.08	-1.8016	0.175615	7.11389e-26	1.98285e-23
Sqle	244.381	2.10731	0.204798	7.43425e-26	2.0376e-23
Rgs4	522.035	2.12458	0.207233	1.27352e-25	3.43329e-23
Adamts4	1057.44	-1.35959	0.13472	5.20891e-25	1.38162e-22
Ifi207	434.951	-1.8027	0.179868	7.76965e-25	2.02813e-22
Dlk1	3124.73	-3.52343	0.356583	2.58181e-24	6.63404e-22
Sparcl1	2712.81	-1.77309	0.179378	3.35796e-24	8.49565e-22
Nrk	1118.92	-1.69055	0.171399	4.32431e-24	1.07747e-21
S100a4	2973.44	1.39562	0.141492	5.378e-24	1.32002e-21
Kitl	232.051	-2.05164	0.209394	7.7344e-24	1.87047e-21
Nrep	3856.85	-1.51852	0.155325	1.08246e-23	2.57986e-21
Rasip1	68.8	-3.10812	0.319322	1.18928e-23	2.79395e-21
Tmem97	690.49	1.39408	0.143177	1.93367e-23	4.47876e-21
Tspan7	160.981	-1.93556	0.199443	2.00942e-23	4.58957e-21
Prnd	58.5002	-3.47408	0.359242	2.22056e-23	5.00234e-21
Gbp3	323.717	-1.75595	0.181334	2.3976e-23	5.32818e-21
Ydjc	430.362	1.64115	0.169555	3.0093e-23	6.59839e-21
Tln2	1921.86	1.25138	0.129213	3.76729e-23	8.15172e-21
Lpl	3134.73	-1.5349	0.159387	4.32016e-23	9.22664e-21
Srm	1863.69	1.23059	0.127477	4.76007e-23	1.00358e-20
Fbln7	1099	-2.02926	0.211867	6.32832e-23	1.31733e-20
Hspa5	16407.3	1.15937	0.120588	7.70128e-23	1.58309e-20
P2ry1	72.1986	-3.11738	0.32702	1.0021e-22	2.03451e-20
Rbp7	56.4977	-3.48147	0.366792	1.38169e-22	2.77096e-20
Adam19	1310.31	-1.22819	0.128916	1.61748e-22	3.20476e-20
Ddah1	5372.9	1.72034	0.180928	1.70126e-22	3.33062e-20
Ppp1r9a	193.718	-1.90444	0.201298	2.19089e-22	4.23873e-20
Lifr	757.278	-1.72187	0.182744	3.19284e-22	6.10538e-20
Thbs1	7709.25	1.90064	0.202092	3.75851e-22	7.10445e-20
Ccl7	4056.63	1.47597	0.157126	4.55383e-22	8.50997e-20
Lrrc59	2405.43	1.0629	0.112673	5.27599e-22	9.74872e-20
Sox18	75.5444	-3.37528	0.363473	6.58076e-22	1.20245e-19
Igf2	3962.39	-3.43764	0.369774	7.28822e-22	1.31709e-19
C1qtnf3	21343.1	0.959173	0.102586	1.36873e-21	2.4203e-19
Creld2	875.658	1.58967	0.171408	1.35581e-21	2.4203e-19
Mgarp	220.828	2.57467	0.277793	1.41271e-21	2.47149e-19
Itga6	167.534	-2.8183	0.307574	2.49781e-21	4.32385e-19
Iigp1	857.816	-1.79793	0.196073	3.14212e-21	5.38251e-19
Prdx5	7332.77	1.07136	0.116459	4.46674e-21	7.57273e-19
Scx	1565.45	1.45812	0.159362	4.55182e-21	7.63823e-19
Cmah	227.846	2.37992	0.261309	6.70663e-21	1.11405e-18
AW551984	464.862	-1.40701	0.154599	7.68317e-21	1.2635e-18
Col8a2	1188.97	1.17967	0.129806	1.02485e-20	1.66868e-18
Rgmb	827.583	-1.43418	0.158375	1.16708e-20	1.88163e-18
Ier3	10616	0.973315	0.107549	1.9247e-20	3.07298e-18
Cbfa2t3	95.4866	-3.34767	0.373811	2.14623e-20	3.39372e-18
C1s1	3014.28	-1.15526	0.1289	3.38988e-20	5.3092e-18
Tmem45a	1642.23	1.28818	0.144038	4.20702e-20	6.52684e-18
Gbp5	113.082	-2.65072	0.300259	5.07038e-20	7.79275e-18
Cdh13	93.0124	-2.96598	0.336332	6.2504e-20	9.51739e-18
Fbln2	12819.9	1.09583	0.123216	6.71986e-20	1.01384e-17
S1pr1	176.531	-1.86457	0.211275	7.94397e-20	1.18762e-17
Gimap6	92.5745	-2.27831	0.2596	9.30998e-20	1.3793e-17
Anxa3	1604.92	1.24746	0.141112	9.60003e-20	1.40958e-17
Megf6	743.875	1.46261	0.166281	1.12685e-19	1.63992e-17
Ppa1	1430.96	1.20777	0.137241	1.49338e-19	2.15427e-17
Manf	7786.74	1.25777	0.143255	1.74936e-19	2.50158e-17
Galk1	1461.25	1.20528	0.137943	2.40761e-19	3.4132e-17
Nfkbia	11161.7	1.10386	0.126206	2.51452e-19	3.52311e-17
Tuba1a	11473.8	1.09718	0.125444	2.52798e-19	3.52311e-17
Cavin2	530.306	-1.84752	0.213037	2.79096e-19	3.85691e-17
Gja4	34.4506	-4.93462	0.567367	3.5831e-19	4.91034e-17
Vipr2	36.7528	-4.2591	0.493195	3.93289e-19	5.34516e-17
Hbegf	2303.88	1.69442	0.196328	4.66725e-19	6.29123e-17
Serpine1	3777.58	1.68923	0.195713	4.82552e-19	6.45168e-17
Nme1	4731.32	1.18358	0.136752	5.44453e-19	7.22059e-17
Atp1a2	111.303	-2.64275	0.308612	5.51907e-19	7.26089e-17
Rtl3	496.379	-1.35485	0.15707	6.05204e-19	7.89887e-17
Gngt2	211.679	-1.96831	0.230004	7.02618e-19	9.09807e-17
Csgalnact1	1355.87	1.17937	0.138158	1.58566e-18	2.0372e-16
Afap1l2	49.7761	-3.15518	0.374366	1.60483e-18	2.04585e-16
Aqp7	37.7469	-4.42952	0.524748	1.6576e-18	2.09687e-16
Abcg1	265.329	-1.66743	0.196585	1.73802e-18	2.18182e-16
Flt1	160.045	-2.55125	0.304316	2.77792e-18	3.46083e-16
Hvcn1	154.088	-1.85696	0.220792	3.03477e-18	3.75239e-16
F11r	80.5001	-3.30037	0.396163	3.5258e-18	4.327e-16
Hmcn1	400.086	-1.64997	0.197449	4.43294e-18	5.39997e-16
Ccn2	4322.15	1.30588	0.155745	4.94895e-18	5.98423e-16
Pdgfra	2636.56	-1.28651	0.153606	5.3218e-18	6.38811e-16
Gimap1	35.0577	-4.69051	0.5646	6.3073e-18	7.5162e-16
Smad7	1297.25	1.20928	0.14494	8.13839e-18	9.5597e-16
Agtr2	472.137	-4.50712	0.546901	8.10638e-18	9.5597e-16
Odc1	2291.41	0.918575	0.109822	9.34256e-18	1.08963e-15
Fam129a	1340.41	-1.27192	0.153507	1.11761e-17	1.2943e-15
Etv1	270.141	-1.75265	0.212287	1.13687e-17	1.3074e-15
Bcl6b	44.458	-3.18463	0.387038	1.14955e-17	1.31281e-15
Rsad2	159.719	-1.91305	0.23242	1.22962e-17	1.39456e-15
Spon2	513.002	-1.99167	0.242499	1.28256e-17	1.44464e-15
Rassf2	254.57	-1.96462	0.239326	1.4156e-17	1.58364e-15
Nrarp	41.6161	-3.12828	0.381041	1.4781e-17	1.64239e-15
Lpar4	736.833	-1.3713	0.166555	1.69867e-17	1.8748e-15
St8sia4	46.879	-3.01051	0.368063	1.74896e-17	1.91744e-15
Nid2	1522.54	-1.21137	0.147233	1.89469e-17	2.04988e-15
Pgp	1331.17	1.21531	0.14763	1.89305e-17	2.04988e-15
Hmgcs1	827.016	1.32364	0.160729	1.99108e-17	2.14008e-15
Pcdh1	55.372	-2.94339	0.363546	2.50801e-17	2.67819e-15
Fkbp11	4577.33	1.01796	0.124001	2.84182e-17	3.01508e-15
Ifi203	1226.44	-1.4012	0.173001	4.53787e-17	4.78368e-15
Higd1b	31.1194	-4.48595	0.552698	5.83268e-17	6.10945e-15
Eif5a	8230.69	0.85497	0.10491	6.27195e-17	6.52799e-15
Pltp	352.132	-1.81802	0.226425	6.6192e-17	6.84608e-15
Cryab	1176.46	1.24566	0.154304	6.9386e-17	7.13157e-15
Lum	13060.1	-1.19191	0.147977	8.06079e-17	8.23352e-15
Ramp3	42.0969	-3.04484	0.381287	8.7121e-17	8.84386e-15
Ccn3	3721.95	1.14393	0.142339	1.03745e-16	1.04668e-14
Cpe	283.038	-2.15743	0.271687	1.1178e-16	1.12087e-14
Sox7	43.7421	-2.91741	0.367721	1.22218e-16	1.2181e-14
Nfia	4196.09	-1.01795	0.127052	1.41858e-16	1.40533e-14
Atp5g1	6191.02	0.972702	0.1213	1.45732e-16	1.43507e-14
Clec3b	3943.58	-1.60667	0.2032	1.93936e-16	1.89838e-14
Uck2	657.34	1.09846	0.138155	2.25906e-16	2.19824e-14
Abca9	972.264	-1.07904	0.135973	2.41349e-16	2.3347e-14
Nppc	156.405	-1.84767	0.236486	3.36198e-16	3.2332e-14
AW112010	686.394	-1.2371	0.157339	3.7085e-16	3.54571e-14
Fads3	578.673	1.23905	0.157831	4.16898e-16	3.96294e-14
Trp53i11	58.8702	-2.41778	0.311249	4.27915e-16	4.04429e-14
Mall	32.142	-4.43111	0.571423	4.5756e-16	4.29975e-14
Adamts15	281.801	-1.33745	0.171791	6.28836e-16	5.87569e-14
Oas2	96.1965	-1.8555	0.239932	6.52835e-16	6.06547e-14
Gmppb	893.7	1.11053	0.142292	6.7888e-16	6.27202e-14
Lmo2	327.063	-1.40874	0.18267	9.90686e-16	9.10158e-14
C130074G19Rik	61.5371	-3.46328	0.454981	1.016e-15	9.28227e-14
Matn3	100.738	2.45717	0.316982	1.06963e-15	9.71831e-14
Oasl2	469.339	-1.2614	0.163931	1.33927e-15	1.21013e-13
Il17d	309.986	-1.29374	0.168478	1.35531e-15	1.21793e-13
Ass1	672.817	1.33661	0.1741	1.46341e-15	1.30792e-13
Fam49a	195.921	-1.6686	0.218185	1.53409e-15	1.36369e-13
Rnf213	660.268	-1.05349	0.136951	1.75737e-15	1.55376e-13
Cnn2	2629.83	1.37368	0.179506	1.89691e-15	1.66816e-13
Gpm6b	1179.07	-0.982861	0.127833	1.95326e-15	1.70858e-13
Sult1a1	49.3039	-2.58101	0.341436	2.50089e-15	2.17604e-13
Eif4ebp1	2106	0.917237	0.119651	2.71053e-15	2.34603e-13
Cdkn2b	232.049	1.73291	0.227585	2.75761e-15	2.37428e-13
Nav2	39.8004	-2.98273	0.398698	4.0355e-15	3.45645e-13
Il17rc	475.393	1.27472	0.16915	4.4423e-15	3.78517e-13
Adgrg1	45.381	-2.87676	0.386873	4.77375e-15	4.04661e-13
Il4ra	436.884	1.14826	0.152306	5.57847e-15	4.70451e-13
Kcnma1	332.416	1.34716	0.179732	5.67074e-15	4.75793e-13
Egln1	1585.82	1.22111	0.162544	5.87278e-15	4.90243e-13
Rexo2	4591.34	0.837299	0.110495	6.41352e-15	5.32678e-13
Gbp7	461.246	-1.27084	0.169849	6.85708e-15	5.66657e-13
Gbp6	73.0902	-2.32227	0.313303	6.97522e-15	5.73538e-13
Prokr2	140.305	2.07539	0.277499	8.19455e-15	6.70445e-13
Ybx1	14167.5	0.776349	0.104107	8.26878e-15	6.73169e-13
Dock9	186.909	-1.53584	0.20775	1.08016e-14	8.75035e-13
Tubb2a	4469.36	1.10803	0.148964	1.13461e-14	9.14642e-13
Nfib	5131.61	-0.796605	0.106186	1.17125e-14	9.39568e-13
Crispld1	261.761	-1.22755	0.165685	1.2204e-14	9.7425e-13
Myl6	30151.1	0.875635	0.116161	1.45067e-14	1.15247e-12
Lrrc55	25.4489	-4.12268	0.559911	1.50712e-14	1.19156e-12
Ifit3	456.068	-1.78232	0.243606	1.62267e-14	1.27679e-12
Msmo1	194.046	1.61172	0.21829	1.65695e-14	1.29755e-12
Ppp1r14b	6036.74	0.933757	0.126114	1.7752e-14	1.38356e-12
Cmpk2	54.5354	-2.51443	0.346459	2.09099e-14	1.622e-12
Ace	738.971	-1.63642	0.224544	2.2027e-14	1.70063e-12
Slit2	218.979	1.4556	0.198839	2.24858e-14	1.72794e-12
Cdh3	181.048	1.52147	0.207469	2.25913e-14	1.72798e-12
Irf8	109.878	-1.75186	0.240381	2.31621e-14	1.76343e-12
Myl9	2477.57	1.37393	0.187814	2.37664e-14	1.8011e-12
Fmo1	354.723	-1.39333	0.191654	3.00886e-14	2.26976e-12
Gm12216	245.384	-1.44166	0.198378	3.11272e-14	2.33738e-12
Kcnn3	45.2047	-2.75819	0.382848	3.34846e-14	2.50297e-12
Pxdc1	853.163	1.06409	0.145395	3.49694e-14	2.60213e-12
Srgn	438.067	-1.49318	0.206055	3.52977e-14	2.61473e-12
Lsamp	73.3332	-2.35151	0.326931	3.60282e-14	2.65688e-12
Nrg1	301.639	1.74874	0.241076	3.87281e-14	2.84323e-12
Lrig3	963.127	0.922327	0.126628	4.92269e-14	3.59794e-12
Dtx4	255.034	-1.29575	0.179813	5.43898e-14	3.9577e-12
Kif26b	301.773	1.49219	0.20654	5.46395e-14	3.95836e-12
Sfrp1	4642.22	1.10061	0.153089	7.58818e-14	5.47314e-12
Smagp	48.1648	-2.84492	0.401984	7.67341e-14	5.51045e-12
Hsp90b1	14482.6	0.936533	0.129816	7.8233e-14	5.59366e-12
Ly86	118.37	-2.41266	0.340111	8.06394e-14	5.74076e-12
Hspb1	2300	1.06947	0.14901	8.757e-14	6.20728e-12
Ptch2	68.973	-2.13483	0.302463	9.50138e-14	6.70601e-12
Ifit1	536.76	-1.73005	0.244682	1.04966e-13	7.3768e-12
Ccdc80	12086.2	0.815777	0.113565	1.42914e-13	1.00009e-11
Plvap	166.647	-2.08403	0.298752	1.65119e-13	1.15059e-11
Nt5dc2	1898.33	1.13538	0.160538	1.66825e-13	1.15757e-11
Meox2	1697.13	-1.0257	0.14513	1.86491e-13	1.28859e-11
Fam167b	24.7206	-4.36552	0.624366	1.92554e-13	1.32492e-11
Ssr4	12079.4	0.861163	0.121172	2.01124e-13	1.37812e-11
Runx1	5249.13	1.10075	0.155972	2.03072e-13	1.38569e-11
6330403K07Rik	499.604	-1.11803	0.158986	2.23105e-13	1.5161e-11
Gbp4	22.8737	-5.05019	0.715943	2.40207e-13	1.6256e-11
Lama5	37.6547	-2.74052	0.396274	2.69325e-13	1.81518e-11
Idi1	202.016	1.95368	0.279013	2.705e-13	1.81566e-11
Arhgdig	288.983	1.29779	0.185422	2.73006e-13	1.82504e-11
Gt(ROSA)26Sor	958.642	1.23467	0.176422	2.77608e-13	1.84828e-11
Vamp5	720.536	1.08979	0.155969	3.34437e-13	2.21767e-11
Rflnb	1548.88	0.935742	0.133284	3.47354e-13	2.29407e-11
Crebrf	350.056	-1.12907	0.162034	3.59575e-13	2.36529e-11
Nop56	726.982	0.936666	0.134059	4.03325e-13	2.6425e-11
Tagln	12596.8	2.60915	0.380815	4.10712e-13	2.68022e-11
Rgma	586.67	-0.959515	0.137633	4.20109e-13	2.73071e-11
Arhgef15	43.7771	-2.56239	0.374787	4.28372e-13	2.77345e-11
Esr1	152.808	-1.402	0.203386	4.42482e-13	2.85358e-11
Col12a1	16000.9	1.08503	0.156303	4.65002e-13	2.98709e-11
Bsg	12216.9	0.954586	0.136716	5.18855e-13	3.32006e-11
Entpd1	98.363	-2.28997	0.336339	5.20892e-13	3.32018e-11
Cgref1	153.302	1.6744	0.244996	5.33601e-13	3.38805e-11
Ankrd37	152.164	2.21004	0.321302	5.4149e-13	3.42492e-11
Plac8	1198	-1.01577	0.146956	5.93027e-13	3.72455e-11
Rtp4	395.304	-1.40618	0.205334	5.93392e-13	3.72455e-11
Guk1	1792.72	0.886241	0.127612	6.03005e-13	3.7705e-11
Mrpl17	1959.71	0.943103	0.13639	6.59551e-13	4.10845e-11
Cav2	229.932	-1.55825	0.228831	6.99123e-13	4.33852e-11
Camk2n1	539.059	-1.38805	0.203546	7.33271e-13	4.53332e-11
Stard9	311.97	-1.15455	0.168624	8.08787e-13	4.98146e-11
Vegfd	397.584	1.2123	0.177447	8.48102e-13	5.20412e-11
Gpi1	2356.51	0.797021	0.115034	8.5921e-13	5.25268e-11
Plaat3	2900.24	0.977557	0.14233	9.02196e-13	5.49504e-11
Dusp10	286.945	1.32862	0.194429	9.35678e-13	5.67794e-11
Plxnc1	149.316	-1.38143	0.203331	9.48868e-13	5.73681e-11
Abca6	141.745	-1.71304	0.254102	9.94373e-13	5.98991e-11
Tnfsf10	27.9098	-3.53677	0.526144	1.03439e-12	6.20825e-11
Ubl4a	979.201	0.95105	0.138927	1.06175e-12	6.34924e-11
Grrp1	21.8285	-5.41295	0.789227	1.10723e-12	6.59724e-11
Mfng	23.3741	-3.80118	0.56382	1.13879e-12	6.76081e-11
Prelid2	413.518	1.34209	0.198385	1.18474e-12	7.00832e-11
Tcf4	6542.66	-0.878496	0.128434	1.24975e-12	7.36636e-11
Spry4	229.9	-1.35054	0.200029	1.29116e-12	7.58324e-11
Mcam	170.976	-1.33039	0.197045	1.33734e-12	7.82654e-11
Eprs	3411.14	0.794649	0.116024	1.41785e-12	8.2683e-11
Anxa2	9744.42	0.709304	0.103165	1.43862e-12	8.35973e-11
Ripor2	34.2926	-2.65892	0.398279	1.49278e-12	8.64391e-11
Rbp4	644.409	1.46551	0.218075	1.52449e-12	8.79659e-11
Actg1	29568.1	0.972644	0.143385	1.67585e-12	9.63614e-11
Fmod	2714.89	1.00743	0.149101	1.80748e-12	1.03568e-10
Csrp2	22159	1.04012	0.154068	1.84173e-12	1.05164e-10
Tomm40	938.538	0.98304	0.145472	1.852e-12	1.05385e-10
Smpdl3a	650.668	-0.986577	0.14627	1.92898e-12	1.09387e-10
Afap1l1	37.2445	-3.1997	0.483536	1.97983e-12	1.11884e-10
Prkg2	143.34	1.84022	0.274309	2.01318e-12	1.13379e-10
Rgs1	175.182	-2.10845	0.317784	2.02621e-12	1.13724e-10
Trim30a	278.007	-1.09991	0.164468	2.41166e-12	1.34897e-10
Hpgd	222.994	1.69046	0.25496	2.55378e-12	1.42362e-10
Tcf7l2	1843.52	-0.8543	0.126882	2.77595e-12	1.54225e-10
Tmem140	421.667	-1.37051	0.206819	2.84098e-12	1.57306e-10
D10Wsu102e	527.825	1.00362	0.150233	2.94925e-12	1.62753e-10
Fgl2	583.757	-1.43077	0.217013	3.35857e-12	1.84721e-10
Col11a1	3539.08	0.962102	0.144076	3.39779e-12	1.86256e-10
Ptx3	1726.26	1.12134	0.169344	3.806e-12	2.07939e-10
Kcnj8	38.4802	-2.97972	0.457087	3.87339e-12	2.1092e-10
Ddx60	143.016	-1.57885	0.24058	3.96658e-12	2.15282e-10
A930037H05Rik	79.8335	-1.83975	0.282027	4.34139e-12	2.34849e-10
Pcsk5	1104.88	1.27419	0.193655	4.55162e-12	2.45414e-10
Slc1a3	681.554	1.1196	0.169359	4.59224e-12	2.46795e-10
Fgd4	170.439	-1.39183	0.211997	4.78743e-12	2.56447e-10
Ccnd1	492.898	-1.22073	0.186069	5.32035e-12	2.84069e-10
Sept4	365.005	-1.50591	0.231135	5.42842e-12	2.88901e-10
Sp100	463.045	-1.00556	0.152641	5.4772e-12	2.90556e-10
Qprt	109.275	-1.83352	0.283162	5.80568e-12	3.06992e-10
Dio2	228.35	-1.92393	0.298387	7.0898e-12	3.73692e-10
Txnl1	2138.25	0.76636	0.115638	7.25666e-12	3.81265e-10
Spry2	1912.49	-0.929902	0.1416	7.3987e-12	3.87489e-10
Mical2	610.581	1.20168	0.184109	7.45559e-12	3.89229e-10
Ero1l	506.629	1.38905	0.214443	8.15945e-12	4.24627e-10
Chd7	57.2647	-2.07873	0.322842	8.46876e-12	4.39334e-10
Cyp2d22	221.323	-1.18909	0.18382	9.67791e-12	5.00482e-10
Frmd4b	105.336	-1.64361	0.255904	9.8758e-12	5.09114e-10
Ndrg1	847.785	1.11383	0.172032	1.07155e-11	5.50677e-10
Bcat1	545.599	1.19907	0.185235	1.09949e-11	5.63275e-10
Myh11	48.2245	-3.25263	0.511468	1.13331e-11	5.78799e-10
Ctla2a	300.604	-3.36694	0.532188	1.14955e-11	5.85276e-10
Gmds	828.113	0.968247	0.149145	1.18411e-11	6.01011e-10
Hsp90aa1	7500.92	0.787651	0.118183	1.20139e-11	6.07901e-10
Pdk1	363.565	1.24542	0.193347	1.23206e-11	6.21512e-10
Plxnd1	584.736	-0.859797	0.132161	1.27032e-11	6.38848e-10
Gm16033	27.6515	-3.04944	0.480536	1.30552e-11	6.54551e-10
Ntf3	70.7206	-1.80985	0.284749	1.36489e-11	6.82238e-10
Cracr2b	36.3369	-2.45725	0.387974	1.37809e-11	6.86746e-10
Gbp2	412.355	-1.48135	0.23242	1.38699e-11	6.89095e-10
Serpinh1	35520.4	0.736653	0.113264	1.40592e-11	6.96397e-10
Upp1	35.6121	-2.54974	0.403105	1.52877e-11	7.54973e-10
Ldb2	224.652	-1.25653	0.196198	1.54846e-11	7.6241e-10
Gli1	32.4216	-2.59732	0.410501	1.56229e-11	7.66919e-10
Ms4a4c	24.2436	-3.63445	0.572036	1.59815e-11	7.8219e-10
Gucy1b1	101.485	-1.70528	0.268918	1.71649e-11	8.37618e-10
Eif3b	1216.01	0.813609	0.125663	1.78421e-11	8.68087e-10
Snta1	291.857	1.18519	0.185381	1.79546e-11	8.70982e-10
Nrros	55.4051	-2.5524	0.405389	1.80741e-11	8.74201e-10
Dpysl2	1582.68	-0.830742	0.128599	1.82453e-11	8.79896e-10
Mthfd2	398.816	1.05856	0.165127	1.89577e-11	9.11576e-10
She	30.8018	-2.84119	0.45362	1.94783e-11	9.33878e-10
Tcp11l2	489.965	-1.28098	0.201866	2.03574e-11	9.73191e-10
Dach1	24.3855	-3.42243	0.547341	2.10686e-11	1.00427e-09
Smoc1	240.073	1.56735	0.249072	2.16765e-11	1.02729e-09
Eda2r	73.1971	-1.9799	0.3147	2.16569e-11	1.02729e-09
Dtd1	1141.08	0.869522	0.135524	2.33973e-11	1.10566e-09
Plk3	406.911	1.0975	0.172412	2.44392e-11	1.15158e-09
Pcmtd2	334.655	-0.972165	0.152737	2.54899e-11	1.19766e-09
Zfp593	536.439	0.954182	0.149574	2.55626e-11	1.19766e-09
Myo7a	249.017	1.18545	0.187094	2.66708e-11	1.24603e-09
Abcc9	60.9508	-2.38336	0.381801	2.78709e-11	1.2984e-09
Thbd	275.262	-1.07349	0.169617	2.7964e-11	1.29906e-09
9930111J21Rik2	65.9906	-2.07696	0.334858	2.80979e-11	1.30161e-09
Adam23	769.074	0.846447	0.132502	2.83964e-11	1.31174e-09
Eln	7474.81	1.14161	0.181108	3.04918e-11	1.40459e-09
Maff	842.158	0.934904	0.147218	3.07645e-11	1.41319e-09
Klhl24	693.072	-0.940224	0.148115	3.17971e-11	1.45655e-09
Tspan15	30.2881	-2.78626	0.450205	3.28418e-11	1.50023e-09
Gas1	6821.78	-0.91124	0.143648	3.32867e-11	1.51634e-09
Prss23	1716.02	0.885695	0.139487	3.35824e-11	1.52559e-09
Nme2	37185.6	0.850596	0.133896	3.38241e-11	1.53234e-09
Tubb6	1834.99	0.767871	0.120268	3.41294e-11	1.54192e-09
Parp14	383.773	-1.08176	0.172067	3.4931e-11	1.57381e-09
Cemip	156.602	1.76809	0.282045	3.63859e-11	1.63488e-09
Ly6e	6398.97	-0.68143	0.106614	3.77678e-11	1.69235e-09
Ighm	45.4471	-2.48222	0.401572	4.10349e-11	1.83375e-09
Olfml2a	52.2883	-2.41108	0.391269	4.53345e-11	2.02039e-09
Cfh	413.483	-1.47497	0.238476	4.58626e-11	2.03841e-09
Prelid1	3299.62	0.805229	0.128225	5.20679e-11	2.30797e-09
D630033O11Rik	191.779	-1.44395	0.234387	5.29375e-11	2.34021e-09
Calr	11566.9	0.697203	0.110148	5.48775e-11	2.41946e-09
Slc27a3	234.299	1.17897	0.190256	5.57674e-11	2.45213e-09
Hspd1	2402.68	0.883552	0.140956	5.76663e-11	2.52886e-09
Ecrg4	8524.92	1.12773	0.181136	5.79791e-11	2.53582e-09
Bag1	3213.09	0.73506	0.116484	6.02359e-11	2.62753e-09
Meg3	33328.4	-0.722173	0.116481	6.69957e-11	2.91467e-09
Gars	1431.62	0.867525	0.138965	6.93002e-11	3.00697e-09
A2m	60.9943	3.59367	0.584933	7.05282e-11	3.0522e-09
Taf10	3068.81	0.756355	0.120841	7.78911e-11	3.36199e-09
Ptgs2	2601.45	1.02277	0.165469	8.10842e-11	3.49065e-09
Copz2	4503.7	0.704826	0.11254	8.6139e-11	3.69776e-09
Nolc1	649.538	0.894665	0.144359	8.63447e-11	3.69776e-09
Selenom	14716.9	0.800169	0.128585	8.91277e-11	3.80702e-09
Gmfg	89.8023	-2.04481	0.338387	8.95995e-11	3.81726e-09
Txnip	1750.7	-1.1164	0.182093	9.33055e-11	3.96488e-09
Rnasel	222.504	-1.19003	0.19421	9.46871e-11	4.01322e-09
Gimap5	18.495	-4.29273	0.709414	9.65994e-11	4.08375e-09
Ssh2	497.727	-0.971209	0.157653	9.71068e-11	4.0842e-09
Thbs2	10167.3	0.900944	0.145808	9.70575e-11	4.0842e-09
Prkca	1007.47	0.783077	0.126026	9.79491e-11	4.09866e-09
Lhfpl2	1905.05	-0.823838	0.132863	9.78846e-11	4.09866e-09
Gadd45b	7228.94	0.738028	0.118055	1.0042e-10	4.1914e-09
Peli2	292.109	-1.03987	0.169488	1.03392e-10	4.3045e-09
Ran	4413.27	0.850703	0.137419	1.04126e-10	4.3241e-09
Plekhg1	92.5201	-1.67093	0.27709	1.08235e-10	4.48342e-09
Ablim3	25.7068	-3.145	0.524415	1.09214e-10	4.51261e-09
Srprb	703.164	0.883348	0.143494	1.13212e-10	4.66608e-09
Cd93	328.69	-4.16986	0.702092	1.17317e-10	4.82113e-09
Thbs4	34942.3	0.907425	0.14724	1.1756e-10	4.82113e-09
Ifi30	2194.63	-1.252	0.20645	1.20151e-10	4.91512e-09
Lgals1	63555.4	0.748767	0.12083	1.20875e-10	4.93247e-09
Jam2	152.032	-1.53658	0.255276	1.22411e-10	4.98279e-09
Sra1	2663.85	0.79344	0.12858	1.2621e-10	5.12476e-09
Plxna4	117.267	1.68255	0.27922	1.37853e-10	5.58372e-09
Stat2	340.419	-0.954843	0.156612	1.41023e-10	5.69808e-09
Mlec	3439.76	0.693914	0.112078	1.42242e-10	5.73325e-09
Sec61b	12054.8	0.762785	0.124053	1.49266e-10	6.00166e-09
Col15a1	2118.26	-1.21291	0.200958	1.53627e-10	6.16195e-09
Sema6d	250.72	-1.06534	0.175893	1.61564e-10	6.46451e-09
Dhcr24	94.0082	2.01455	0.33368	1.66133e-10	6.63121e-09
Dnajc25	1831.17	0.808262	0.132131	1.71477e-10	6.82793e-09
Ccn5	533.246	3.09947	0.524985	1.7282e-10	6.86481e-09
Serinc3	1919.03	-0.707919	0.115228	1.82305e-10	7.22412e-09
Gucy1a1	103.739	-1.81123	0.304497	1.83374e-10	7.24899e-09
Icam2	123.164	-4.37609	0.746496	1.84506e-10	7.27625e-09
Eif6	1727.09	0.848599	0.139548	1.96819e-10	7.74325e-09
Ccn4	2619.17	0.926216	0.153114	2.15937e-10	8.47516e-09
Slc7a10	17.7483	-5.81882	0.937736	2.25232e-10	8.79797e-09
Ifrd1	3121.7	0.977879	0.162223	2.25195e-10	8.79797e-09
Ramp2	1100.49	-0.963572	0.160031	2.26966e-10	8.84468e-09
Tpm4	8409.67	0.940928	0.155971	2.31201e-10	8.98842e-09
Srpx2	3748.8	0.75321	0.125219	2.38887e-10	9.26531e-09
Znrd2	788.787	0.859919	0.142323	2.4504e-10	9.4816e-09
Gspt1	2251.04	0.77537	0.127734	2.47462e-10	9.55286e-09
Glul	593.857	-0.939396	0.156322	2.48502e-10	9.57054e-09
Mndal	1265.35	-0.843979	0.139806	2.54021e-10	9.76023e-09
Plxna2	103.934	-1.43369	0.241645	2.58251e-10	9.89099e-09
Cdr2	497.484	0.977466	0.162369	2.58627e-10	9.89099e-09
Serp1	4622.3	0.805068	0.133019	2.60542e-10	9.94111e-09
Slco2b1	29.2734	-2.92767	0.502119	2.66358e-10	1.01395e-08
Dcn	36481.9	-0.919543	0.153119	2.67248e-10	1.01499e-08
Cd14	234.042	-1.52267	0.258089	2.81351e-10	1.06364e-08
C430049B03Rik	440.618	-1.25793	0.212447	2.80996e-10	1.06364e-08
Itih5	2707.34	-2.30353	0.394805	2.9e-10	1.09382e-08
Pdia6	7293.49	0.859813	0.142667	2.9628e-10	1.11495e-08
Adcyap1r1	55.7591	-1.82727	0.311635	2.99049e-10	1.1228e-08
Pecam1	310.761	-3.04943	0.525929	3.10765e-10	1.16413e-08
Necab1	32.8177	-2.49157	0.428206	3.27223e-10	1.22299e-08
Hspa9	1205.33	0.759003	0.125797	3.31764e-10	1.23716e-08
Filip1	256.226	-1.09324	0.184737	3.37474e-10	1.2556e-08
Fam117a	132.402	-1.40688	0.238958	3.40601e-10	1.26437e-08
Abi3	24.2439	-2.97524	0.513985	3.46922e-10	1.28494e-08
Rasl11b	423.179	1.11592	0.188735	3.53159e-10	1.3051e-08
Zcchc24	1156.87	-0.930408	0.156145	3.57542e-10	1.31834e-08
Ogt	722.57	-1.06963	0.180449	3.67315e-10	1.35134e-08
Ckap4	7948.09	0.6779	0.112243	3.78854e-10	1.39068e-08
Tril	913.679	-0.855493	0.143824	4.41293e-10	1.61627e-08
Cd34	1787.16	-0.867256	0.145967	4.44437e-10	1.6177e-08
Dap	5143.79	0.714512	0.119116	4.43238e-10	1.6177e-08
Cybb	107.1	-2.08104	0.359111	4.44635e-10	1.6177e-08
Btnl9	16.9006	-4.163	0.718114	4.60448e-10	1.67154e-08
Hacd1	1121.65	0.743901	0.124377	4.64491e-10	1.6825e-08
Tubb2b	2007.7	0.958139	0.162216	4.75944e-10	1.7202e-08
Anapc15	439.377	0.911986	0.153818	4.77483e-10	1.72198e-08
Cxcl10	2111.32	-0.972317	0.164898	4.82625e-10	1.73671e-08
Tie1	63.9798	-4.73628	0.832478	4.92954e-10	1.76615e-08
Ccl12	57.402	-2.12621	0.370141	4.92536e-10	1.76615e-08
Ctsb	7644.72	-0.610812	0.101675	5.10776e-10	1.82602e-08
Xdh	205.888	-1.43657	0.248198	5.19602e-10	1.85355e-08
Plk2	966.394	0.878749	0.148756	5.3911e-10	1.91897e-08
Cpne8	748.823	0.844154	0.142672	5.41089e-10	1.92186e-08
H2-Q4	473.953	-1.45323	0.251371	5.50421e-10	1.95079e-08
Dda1	920.146	0.736212	0.123685	5.66841e-10	2.00467e-08
Haus7	246.758	1.05972	0.180575	5.79016e-10	2.04333e-08
Cct3	1950.97	0.771384	0.129856	5.94385e-10	2.09307e-08
Tppp3	2038.95	-1.11183	0.190781	5.99358e-10	2.10608e-08
Ufm1	2327.04	0.644123	0.107799	6.12763e-10	2.14859e-08
Nt5c	1804.88	0.8029	0.135801	6.14912e-10	2.15154e-08
S100a16	5092.76	0.678069	0.1139	6.46615e-10	2.25766e-08
Slc2a1	353.258	1.35159	0.233619	6.59607e-10	2.29329e-08
Aimp2	401.499	0.956166	0.163166	6.58401e-10	2.29329e-08
H2-T23	671.83	-1.1768	0.203231	6.67913e-10	2.31726e-08
Yif1b	2095.2	0.816899	0.13874	6.99935e-10	2.42325e-08
Nav1	1643.32	-0.794299	0.134827	7.13109e-10	2.46367e-08
Ifit3b	134.394	-1.70888	0.299815	7.20534e-10	2.48411e-08
Ostc	7796.08	0.661654	0.111212	7.24375e-10	2.49212e-08
Ldlr	437.423	0.929235	0.158603	7.26148e-10	2.49301e-08
Tmem238	395.943	0.939875	0.16074	7.29809e-10	2.50036e-08
Grhpr	485.167	0.904199	0.154803	7.79279e-10	2.66429e-08
Coro1a	119.119	-1.38277	0.240494	8.07382e-10	2.75465e-08
Arhgef3	73.4902	-1.58969	0.279236	8.82933e-10	2.99997e-08
Ranbp1	3925.32	0.725257	0.123234	8.82163e-10	2.99997e-08
Endog	528.958	0.860782	0.147607	9.41357e-10	3.19188e-08
D830025C05Rik	498.497	1.33352	0.23368	9.6068e-10	3.24402e-08
P4ha1	2922.39	0.996471	0.172252	9.59532e-10	3.24402e-08
Gale	150.536	1.37795	0.240589	9.76995e-10	3.29235e-08
Fmo2	46.2902	-2.23302	0.396497	9.98296e-10	3.35644e-08
Cspg4	319.828	-1.03655	0.179764	1.0001e-09	3.35644e-08
Rps2	60724.8	0.652108	0.109239	1.02938e-09	3.4477e-08
Insig1	472.277	1.02767	0.177786	1.03565e-09	3.46164e-08
Ednra	547.532	-1.02234	0.177555	1.04088e-09	3.47205e-08
Ebna1bp2	953.828	0.82628	0.142134	1.04649e-09	3.4837e-08
Vwf	17.9338	-3.74082	0.662285	1.06502e-09	3.53825e-08
Sema5a	1063.44	-0.846424	0.146195	1.12226e-09	3.72087e-08
Ngf	75.0676	1.80905	0.318198	1.14866e-09	3.80074e-08
Gpx7	2912.71	0.683498	0.116191	1.16961e-09	3.86229e-08
Dad1	8138.02	0.665267	0.113606	1.18275e-09	3.89786e-08
Bag2	292.17	1.13843	0.199489	1.21968e-09	4.01152e-08
Epas1	237.386	-1.11561	0.195585	1.25698e-09	4.12595e-08
Ctps	348.806	1.19315	0.20956	1.28626e-09	4.21364e-08
Prdx6	2473.64	0.722202	0.124789	1.31356e-09	4.29452e-08
Jmjd6	632.639	0.807111	0.139619	1.33325e-09	4.35025e-08
Camk4	223.977	1.3939	0.247413	1.36384e-09	4.44124e-08
Nek6	711.387	0.762719	0.131792	1.44686e-09	4.7023e-08
Swi5	5949.46	0.610408	0.104438	1.47843e-09	4.79542e-08
Bcl2l11	547.386	-0.950432	0.166137	1.48975e-09	4.82264e-08
Tnrc6b	1036.25	-0.758202	0.131214	1.49876e-09	4.84227e-08
Hras	1511.54	0.819514	0.14224	1.51943e-09	4.88027e-08
Nxn	1287.13	0.800341	0.138861	1.51458e-09	4.88027e-08
Arrdc3	456.872	-0.842041	0.146588	1.51938e-09	4.88027e-08
AI506816	1707.84	0.7862	0.1363	1.55528e-09	4.98568e-08
Selenos	4959.03	0.63798	0.1097	1.63832e-09	5.24166e-08
Antxr2	993.912	-0.726179	0.125829	1.6417e-09	5.24227e-08
Snrpd1	2442.24	0.640265	0.110139	1.65648e-09	5.27924e-08
Phf11d	353.691	-1.18835	0.211205	1.66087e-09	5.28299e-08
Copb2	3924.55	0.61355	0.105379	1.67394e-09	5.31428e-08
Id1	1043.88	1.06576	0.187863	1.7119e-09	5.42432e-08
Rgs5	745.995	-3.73683	0.68189	1.79561e-09	5.66772e-08
Siah2	251.434	0.990794	0.174269	1.79446e-09	5.66772e-08
Grap	28.6933	-2.74583	0.500595	1.88685e-09	5.9443e-08
Fdft1	191.067	1.21194	0.216077	1.96177e-09	6.16851e-08
Parvb	30.064	-2.43773	0.442654	1.96906e-09	6.17962e-08
Pusl1	452.348	0.88911	0.156806	2.16773e-09	6.79016e-08
Calhm6	123.846	-1.45316	0.261293	2.17203e-09	6.79071e-08
Plekhf1	342.466	-0.972277	0.172537	2.20618e-09	6.88437e-08
Gm4951	216.238	-1.36276	0.245336	2.21128e-09	6.8872e-08
Cd300a	38.0802	-2.28743	0.414975	2.21833e-09	6.89611e-08
Myh9	4292.93	0.933731	0.165025	2.22532e-09	6.9048e-08
Lsm12	2121.57	0.698969	0.121706	2.28e-09	7.06112e-08
Hdlbp	8170.65	0.652095	0.113396	2.32846e-09	7.19767e-08
Aplnr	94.9275	-4.075	0.751986	2.35564e-09	7.26801e-08
Socs1	812.428	-0.921485	0.163645	2.46893e-09	7.60209e-08
Dtx3l	354.81	-0.879585	0.155835	2.47316e-09	7.60209e-08
Tnfaip8l1	36.4086	-2.22665	0.408536	2.4912e-09	7.64324e-08
Pcp4l1	22.2731	-3.04864	0.559345	2.50405e-09	7.66836e-08
Mmrn2	96.5863	-1.39301	0.251263	2.5131e-09	7.68178e-08
Cped1	1145.72	-0.749249	0.131848	2.62699e-09	8.01499e-08
Cdv3	2881.17	0.801201	0.14157	2.70601e-09	8.24082e-08
Spry1	990.872	-0.939391	0.167381	2.73643e-09	8.31805e-08
Dbi	3634.98	0.68544	0.120344	2.92197e-09	8.86566e-08
Pgm1	675.951	0.900583	0.16033	2.96286e-09	8.97316e-08
Cx3cl1	282.668	1.04402	0.186785	3.02861e-09	9.15541e-08
Bop1	314.77	1.03005	0.184668	3.12388e-09	9.42608e-08
Spcs2	3092.73	0.703656	0.123961	3.1362e-09	9.44595e-08
Stra6	16.0515	-4.23339	0.775463	3.18903e-09	9.58751e-08
Pkn3	40.9822	-1.96112	0.360794	3.32815e-09	9.98748e-08
Fgd5	61.0748	-1.71944	0.315605	3.35893e-09	1.00615e-07
Pdia5	1071.24	0.772358	0.137093	3.3656e-09	1.00631e-07
Socs3	5871.38	-1.04676	0.188783	3.3924e-09	1.01249e-07
Trappc6a	840.063	0.71479	0.126365	3.46497e-09	1.03227e-07
Tpm1	9122.76	1.06429	0.192274	3.57455e-09	1.06299e-07
F2r	1848.22	0.766957	0.135973	3.70171e-09	1.09882e-07
Rtn2	222.512	-1.18803	0.216367	3.76985e-09	1.11703e-07
Il2rg	76.4386	-1.47889	0.271158	3.78188e-09	1.11858e-07
Snrpa1	984.162	0.790866	0.140918	3.84937e-09	1.13446e-07
Rasgrp3	58.4161	-2.09989	0.389298	3.84778e-09	1.13446e-07
Ptger3	50.0669	2.62668	0.480497	3.85785e-09	1.13492e-07
Tnfsf9	411.497	-1.02442	0.185576	3.87901e-09	1.13911e-07
Myl12a	9244.49	0.650202	0.114662	3.89874e-09	1.14287e-07
Mbd3	1722.7	0.726139	0.1293	4.13912e-09	1.21117e-07
Ift20	4560.63	0.680156	0.120636	4.14999e-09	1.2122e-07
Asns	208.296	1.09855	0.199133	4.15809e-09	1.21241e-07
Ssr2	6694.56	0.730811	0.129889	4.20064e-09	1.22265e-07
Sigmar1	743.281	0.917849	0.165819	4.25567e-09	1.23429e-07
Rnf122	448.98	-0.831657	0.14921	4.25093e-09	1.23429e-07
Wnt5a	494.902	-0.766031	0.136941	4.27741e-09	1.23842e-07
Sdf2l1	527.829	1.16309	0.212242	4.30293e-09	1.24362e-07
Gm30075	39.8462	-2.02693	0.377431	4.34101e-09	1.25242e-07
Tmtc2	155.656	-1.07434	0.195941	4.71149e-09	1.35693e-07
Agrn	251.182	-0.960011	0.174519	4.7771e-09	1.37342e-07
Sod3	1373.53	0.981365	0.17836	4.82074e-09	1.38354e-07
Trim34a	86.1927	-1.34621	0.248576	4.87865e-09	1.39773e-07
Fam136a	401.574	0.911196	0.164913	4.99333e-09	1.42809e-07
Ube2m	2510.67	0.662406	0.117643	5.06943e-09	1.44734e-07
Csf1	1269.63	0.701016	0.125395	5.14488e-09	1.46634e-07
Plod2	5039.65	0.96202	0.174966	5.18869e-09	1.47626e-07
Nhp2	1318.27	0.847864	0.153132	5.2372e-09	1.48749e-07
Gys1	249.829	1.18801	0.218131	5.5997e-09	1.58771e-07
Mill2	102.288	-1.4694	0.273674	5.62345e-09	1.5917e-07
Thrsp	17.1714	-3.51449	0.661003	5.7619e-09	1.62636e-07
Clec14a	163.122	-1.04162	0.191121	5.7657e-09	1.62636e-07
Tmem160	2187.14	0.714092	0.128409	6.02315e-09	1.69607e-07
Rgs3	1383.56	0.815599	0.147878	6.03992e-09	1.69789e-07
Vasn	2289.64	0.797479	0.144343	6.18954e-09	1.73698e-07
Gadd45a	875.564	-0.887374	0.161864	6.23991e-09	1.74516e-07
Vgll3	912.888	0.969576	0.177134	6.23672e-09	1.74516e-07
Calm1	12976.7	0.656353	0.117574	6.27004e-09	1.75061e-07
Islr	5868.64	-0.893815	0.163169	6.32359e-09	1.76257e-07
Igfbp6	4707.79	-0.854471	0.155709	6.4005e-09	1.78098e-07
Scai	236.996	-0.939227	0.17193	6.54653e-09	1.81854e-07
Col5a3	4703.42	-0.766478	0.139166	6.63899e-09	1.84111e-07
Etf1	1298.91	0.722002	0.13029	6.69282e-09	1.85292e-07
Entpd2	1679.32	-1.01837	0.187797	6.98148e-09	1.92959e-07
Zfp36	10097.1	-0.659372	0.118756	7.03985e-09	1.94246e-07
Gcsh	901.774	0.795549	0.14451	7.055e-09	1.94337e-07
Nfatc1	716.438	0.841664	0.153507	7.13403e-09	1.96186e-07
Kdelr3	3628.36	0.651865	0.116975	7.32391e-09	2.01071e-07
Gm38973	94.7374	-1.32767	0.248773	7.41973e-09	2.03363e-07
Rasd1	188.507	1.29283	0.240814	7.44573e-09	2.03736e-07
Galnt16	436.492	0.924715	0.169578	7.46861e-09	2.04022e-07
Calcrl	334.413	-1.09813	0.2037	7.61605e-09	2.07705e-07
Twist1	1561.61	0.669568	0.121027	7.71574e-09	2.10075e-07
Camk2n2	338.764	0.934291	0.17229	8.09329e-09	2.1999e-07
Hs6st1	476.809	0.862707	0.158523	8.19573e-09	2.22407e-07
Oaz1	15464.1	0.599301	0.107917	8.31496e-09	2.25271e-07
Tbcb	2315.6	0.716645	0.130407	8.76652e-09	2.37114e-07
Mmp15	38.3853	-2.36372	0.453203	8.82909e-09	2.38414e-07
Zpr1	442.572	0.834359	0.153296	8.86351e-09	2.38951e-07
Vwa1	208.423	-1.27782	0.240851	9.22218e-09	2.47808e-07
Kctd12b	163.367	-1.1333	0.211725	9.22135e-09	2.47808e-07
Mfap5	26351.3	0.718826	0.131811	9.34016e-09	2.50569e-07
Msc	990.691	0.894614	0.165293	9.45057e-09	2.53118e-07
Mrpl54	2250.89	0.727656	0.133069	9.57585e-09	2.56057e-07
F830016B08Rik	161.605	-1.68244	0.320683	9.60555e-09	2.56434e-07
Dock6	163.125	-1.03482	0.193246	9.65519e-09	2.57341e-07
Nans	1328.45	0.701519	0.128069	9.90048e-09	2.63452e-07
Cd300lg	72.237	-4.61988	0.898318	1.00739e-08	2.67633e-07
Etv5	194.57	-1.02292	0.190824	1.00975e-08	2.67828e-07
Tenm4	56.9865	-2.25167	0.432988	1.02427e-08	2.70807e-07
Nudcd2	2020.15	0.678264	0.123603	1.02402e-08	2.70807e-07
Prex2	78.3764	-1.69521	0.323238	1.03187e-08	2.72378e-07
Chchd7	602.42	0.7336	0.134518	1.04541e-08	2.75508e-07
Gramd1b	102.937	-1.24794	0.235509	1.06612e-08	2.80519e-07
Ly96	235.59	-0.950322	0.177205	1.08735e-08	2.85646e-07
Mitf	200.827	-1.03337	0.193493	1.09109e-08	2.86171e-07
Crip2	952.736	-0.691144	0.126673	1.09476e-08	2.86677e-07
Plscr4	321.075	-1.06428	0.199639	1.12314e-08	2.93642e-07
Dll4	16.0855	-3.76189	0.723387	1.14162e-08	2.97999e-07
Fbl	1138.14	0.75482	0.139012	1.16751e-08	3.04275e-07
Pcdh12	21.2568	-2.91278	0.559573	1.18528e-08	3.08417e-07
Fzd5	260.851	0.989135	0.184495	1.19509e-08	3.10478e-07
Ndrg2	442.434	-0.880616	0.164203	1.20981e-08	3.13806e-07
Zdhhc16	403.678	0.862678	0.16045	1.22511e-08	3.17275e-07
P4hb	14640.3	0.634128	0.115977	1.23189e-08	3.18528e-07
Eif4e2	3027.85	0.609716	0.111287	1.24519e-08	3.21463e-07
Cxcl1	13944.7	0.870433	0.162106	1.25496e-08	3.23478e-07
Ank2	1519.81	-0.633371	0.116055	1.27396e-08	3.2786e-07
Zfp366	13.478	-4.20063	0.797361	1.29106e-08	3.31742e-07
Mylip	833.903	-0.681585	0.125532	1.33343e-08	3.42094e-07
Rgs19	372.817	0.855158	0.159333	1.33687e-08	3.42442e-07
Cldn1	72.2133	-2.20713	0.428487	1.3556e-08	3.467e-07
Arhgap26	68.2988	-1.49225	0.286492	1.36182e-08	3.47752e-07
Pde12	479.357	-0.86792	0.16238	1.3694e-08	3.49143e-07
Gm20559	198.219	-1.01686	0.191808	1.37941e-08	3.51153e-07
Deptor	507.121	-1.04427	0.19718	1.39867e-08	3.55504e-07
Mrto4	679.412	0.852075	0.158791	1.4039e-08	3.56284e-07
Rdh10	494.746	-0.854758	0.159929	1.41716e-08	3.59095e-07
Pcdh17	145.193	-1.33076	0.254336	1.42763e-08	3.61191e-07
Coro1c	719.908	0.847265	0.158082	1.45241e-08	3.66895e-07
Gm266	274.963	-1.17849	0.224815	1.47019e-08	3.70817e-07
Slc28a2	12.7257	-4.34529	0.824751	1.47851e-08	3.71992e-07
Vegfa	597.247	1.11159	0.210824	1.47937e-08	3.71992e-07
Rasl10a	81.4331	-1.47001	0.283661	1.50295e-08	3.77343e-07
Fdx2	1222.14	0.747625	0.138916	1.50858e-08	3.77604e-07
Hunk	30.1194	-2.27394	0.4425	1.50812e-08	3.77604e-07
Prmt1	1683.68	0.723218	0.134187	1.55636e-08	3.88971e-07
Nasp	934.281	0.675074	0.12488	1.59505e-08	3.98036e-07
C2	298.244	-0.908608	0.17154	1.59962e-08	3.98571e-07
Clcn5	1067.03	-0.686323	0.127241	1.60722e-08	3.99861e-07
Nid1	8896.61	-0.75447	0.140655	1.61101e-08	4.00197e-07
Reep5	8656.73	0.615761	0.113429	1.6153e-08	4.00659e-07
Chodl	96.6878	-3.54697	0.696743	1.62494e-08	4.02442e-07
Neurl3	40.0101	-2.16894	0.422759	1.68431e-08	4.16518e-07
Jade1	353.898	-0.875668	0.164854	1.69049e-08	4.1742e-07
Rad23b	1626.47	0.664788	0.123162	1.71003e-08	4.20225e-07
Cycs	1613.99	0.754085	0.14086	1.71055e-08	4.20225e-07
Strap	1527.51	0.613731	0.113239	1.71353e-08	4.20225e-07
Ccdc124	1072.72	0.686061	0.127338	1.71362e-08	4.20225e-07
Mrps16	2760.79	0.702122	0.130755	1.71463e-08	4.20225e-07
Gm8251	70.2793	2.00596	0.392888	1.74748e-08	4.27638e-07
Mmp25	47.2162	2.10361	0.404593	1.78369e-08	4.35852e-07
Ifi213	18.2901	-3.00167	0.589375	1.79763e-08	4.38605e-07
Hyou1	528.857	0.916902	0.173352	1.86758e-08	4.54997e-07
Shank3	62.852	-1.64787	0.322143	1.87752e-08	4.56744e-07
Pbdc1	932.768	0.676828	0.126063	1.94192e-08	4.71711e-07
Mmp9	91.6401	-1.62501	0.316582	2.15649e-08	5.2306e-07
BC028528	233.318	-0.974367	0.186366	2.16274e-08	5.23802e-07
Slc1a4	314.432	1.00486	0.192111	2.17812e-08	5.26752e-07
Gm26903	94.7082	-1.40574	0.273586	2.1946e-08	5.2996e-07
Mrpl12	1312.22	0.714837	0.134363	2.28876e-08	5.51887e-07
Cyth4	52.4718	-2.11373	0.417346	2.33199e-08	5.61487e-07
Wdr75	467.784	0.808849	0.153366	2.34001e-08	5.62595e-07
Ednrb	38.2264	-2.44796	0.486007	2.40418e-08	5.77178e-07
Akap12	1257.94	-0.707239	0.133415	2.46902e-08	5.9188e-07
Gm42679	44.9452	2.32996	0.452615	2.57818e-08	6.1715e-07
Bmf	237.247	-1.19156	0.231842	2.6054e-08	6.2276e-07
Ngfr	22.684	-2.69458	0.537366	2.61985e-08	6.25303e-07
Igf2bp3	61.8008	-1.55505	0.305103	2.65517e-08	6.32815e-07
Mydgf	3597.13	0.657569	0.123714	2.73679e-08	6.51324e-07
Cd59a	266.397	1.04421	0.201941	2.75919e-08	6.55705e-07
Arhgdia	3355.17	0.590315	0.110556	2.83896e-08	6.7369e-07
Rcn3	11184.3	0.626929	0.117345	2.84411e-08	6.7394e-07
Ucma	38.2584	2.66766	0.52622	2.88249e-08	6.82052e-07
Cct7	2085.74	0.696045	0.13164	2.89976e-08	6.85153e-07
Olfml3	4974.84	0.756093	0.144056	2.99672e-08	7.07046e-07
Cmtm8	38.1585	-1.93905	0.385439	3.18268e-08	7.49844e-07
Pdia4	2449.58	0.74264	0.141598	3.21006e-08	7.55214e-07
Galnt17	1189.21	0.613403	0.115651	3.2355e-08	7.60111e-07
Gm49179	83.8296	-1.53187	0.305622	3.48347e-08	8.17199e-07
Cks2	1997.6	0.693186	0.132055	3.49272e-08	8.18203e-07
Appl2	259.736	-0.965108	0.187947	3.56505e-08	8.33959e-07
Ak6	526.609	0.786672	0.150867	3.60792e-08	8.42788e-07
Tmed9	8359.17	0.61617	0.116656	3.61748e-08	8.43822e-07
Bola3	1101.28	0.656817	0.125092	3.70756e-08	8.63609e-07
Nucb2	2187.23	0.659174	0.125511	3.79977e-08	8.83836e-07
Timm10b	3858.35	0.604597	0.114588	3.82763e-08	8.89058e-07
Mrps18b	362.667	0.857553	0.166327	4.05088e-08	9.39586e-07
Uap1	1053.01	0.747265	0.143715	4.15941e-08	9.62047e-07
Cd38	110.286	-1.18324	0.234179	4.159e-08	9.62047e-07
Timm10	452.14	0.770003	0.148343	4.17763e-08	9.64903e-07
Col17a1	30.9167	-2.38636	0.482382	4.2566e-08	9.81765e-07
Grpel1	1547.77	0.742263	0.144309	4.28002e-08	9.85783e-07
Utp18	306.061	0.971737	0.190176	4.33114e-08	9.96163e-07
Rgcc	1250.4	0.778878	0.150617	4.34106e-08	9.9705e-07
Pthlh	295.991	-0.981585	0.193046	4.36057e-08	1.00013e-06
Ak2	1295.31	0.626699	0.119683	4.53346e-08	1.03834e-06
Clec10a	29.1202	-2.40565	0.489243	4.57397e-08	1.04616e-06
Sf3b5	3776.2	0.624188	0.119151	4.64153e-08	1.06014e-06
D8Ertd738e	4450.16	0.605637	0.11478	4.66735e-08	1.0644e-06
Sgsm2	209.55	-0.940316	0.184493	4.67315e-08	1.0644e-06
Jpt2	399.657	0.844559	0.164236	4.76313e-08	1.0834e-06
Abcf2	404.169	0.792912	0.154027	4.81173e-08	1.09294e-06
Fap	2134.2	-0.712534	0.13768	4.95765e-08	1.12453e-06
Scml4	86.7267	-1.38798	0.279222	5.02327e-08	1.13785e-06
Mmab	187.223	1.04559	0.206819	5.26452e-08	1.19085e-06
Nedd9	563.308	0.798529	0.155334	5.33883e-08	1.206e-06
Ptgir	116.593	-1.18687	0.237434	5.37577e-08	1.21268e-06
Ifi47	210.34	-1.05185	0.209337	5.45402e-08	1.22865e-06
Gm10635	20.138	7.2416	2.57113	5.716e-08	1.2859e-06
Gm2a	690.283	-0.69376	0.134612	5.76549e-08	1.29527e-06
Dpyd	51.8765	-1.63291	0.332689	5.87679e-08	1.31847e-06
Kctd11	501.323	0.846608	0.165941	5.93689e-08	1.33014e-06
Ivns1abp	866.553	0.774089	0.151144	5.99763e-08	1.34192e-06
Sgk1	3228.82	0.763058	0.149058	6.02717e-08	1.3467e-06
Mrpl20	2537.14	0.657574	0.127201	6.03771e-08	1.34722e-06
Picalm	3923.82	0.780068	0.15276	6.1661e-08	1.374e-06
Acss3	49.6049	-1.64963	0.335721	6.20514e-08	1.38083e-06
Bik	22.2804	-2.54881	0.524043	6.21358e-08	1.38084e-06
Ak1	575.246	0.706417	0.13804	7.00801e-08	1.55319e-06
Nfkb1	1821.19	0.790989	0.155808	7.00597e-08	1.55319e-06
Hlf	148.609	-1.23879	0.250379	7.28385e-08	1.61215e-06
Cdc34	500.504	0.764355	0.150264	7.40229e-08	1.63616e-06
Ntmt1	606.504	0.769141	0.151679	7.61177e-08	1.68021e-06
E130102H24Rik	127.393	-1.36626	0.2797	7.64947e-08	1.68627e-06
Ptrh1	132.057	1.2234	0.248226	8.00166e-08	1.76154e-06
Mdh2	2495.98	0.630566	0.123289	8.02527e-08	1.76438e-06
Anp32b	4535.51	0.619021	0.120663	8.18621e-08	1.79608e-06
Airn	525.935	-0.70648	0.139142	8.19132e-08	1.79608e-06
Slc38a6	416.917	-0.82999	0.164839	8.20669e-08	1.79706e-06
Fosl1	100.776	1.47457	0.300545	8.64211e-08	1.88989e-06
Grb14	96.2833	1.75161	0.365609	8.94562e-08	1.95366e-06
Efemp2	3659.39	0.667291	0.13119	9.02477e-08	1.96833e-06
Pld4	75.2177	-1.754	0.363089	9.0382e-08	1.96865e-06
Slc24a5	276.784	-1.03225	0.208655	9.1475e-08	1.98982e-06
Mrps6	604.058	0.758068	0.150582	9.27795e-08	2.01553e-06
Tmem208	1990.06	0.709226	0.140075	9.33112e-08	2.02441e-06
Cav1	1606.03	-0.817248	0.163162	9.39018e-08	2.03454e-06
Ltbp4	1478.08	-1.00023	0.202621	9.63958e-08	2.08583e-06
Txnrd1	1492.81	0.646749	0.127136	9.78838e-08	2.11524e-06
Tnc	15486.9	1.02665	0.208591	1.00166e-07	2.16003e-06
Galnt15	18.1497	-2.87649	0.606173	1.00219e-07	2.16003e-06
Eif2s1	1157.14	0.681857	0.134866	1.00488e-07	2.16298e-06
Dnajb11	1538.32	0.710638	0.141017	1.01721e-07	2.18668e-06
Lims2	72.2469	-1.67407	0.350087	1.02671e-07	2.20421e-06
Col6a5	29.085	-2.11426	0.443792	1.04945e-07	2.25009e-06
Ntrk2	252.867	-1.10454	0.226485	1.05947e-07	2.26861e-06
Ror1	281.853	-0.861347	0.173752	1.07699e-07	2.30313e-06
Erp29	5268.32	0.642547	0.126889	1.08382e-07	2.31473e-06
Tm6sf1	52.5871	-1.96712	0.411657	1.09825e-07	2.34252e-06
Enpp3	178.42	-1.04359	0.213294	1.10145e-07	2.34629e-06
Ifih1	324.142	-0.821716	0.165345	1.10735e-07	2.3501e-06
Tmem64	738.965	-0.783939	0.157131	1.10478e-07	2.3501e-06
Psmd7	2766.72	0.626181	0.123492	1.10753e-07	2.3501e-06
Yrdc	466.796	0.777082	0.155404	1.13344e-07	2.39595e-06
Adamts12	944.971	-0.685307	0.136322	1.1335e-07	2.39595e-06
Igf2r	3233.74	-0.58336	0.114964	1.13293e-07	2.39595e-06
Scarf1	19.4009	-2.74259	0.580231	1.13866e-07	2.40377e-06
Slc25a4	11909.9	0.616042	0.121661	1.16177e-07	2.4494e-06
Glrx5	1738.74	0.680466	0.135216	1.16986e-07	2.4633e-06
Ppp1r16b	16.6225	-3.06075	0.647643	1.18015e-07	2.48179e-06
Atp1b2	39.3773	-1.70309	0.357299	1.19554e-07	2.51095e-06
Dnase2a	176.695	-1.00148	0.20514	1.22568e-07	2.57097e-06
Hhex	19.4623	-2.76258	0.581979	1.23228e-07	2.58152e-06
Basp1	4600.54	0.601249	0.118829	1.2531e-07	2.62178e-06
Steap3	888.605	-0.89895	0.18298	1.26995e-07	2.6503e-06
Kcnc2	16.5836	-3.11145	0.657186	1.26975e-07	2.6503e-06
Cd3eap	401.811	0.790041	0.159206	1.27622e-07	2.66e-06
H13	2231.16	0.589059	0.116097	1.28511e-07	2.67514e-06
Plekha5	500.774	-0.679406	0.135675	1.291e-07	2.684e-06
Fgf1	46.2005	-1.80323	0.381345	1.3207e-07	2.74228e-06
Eef1akmt4	335.525	0.832666	0.168315	1.32255e-07	2.74267e-06
Slc25a5	2710.2	0.682132	0.1362	1.32563e-07	2.74559e-06
Edf1	3502.59	0.665383	0.132871	1.36974e-07	2.83338e-06
Suco	690.101	0.706612	0.141631	1.37276e-07	2.83607e-06
Ptgis	375.739	0.863742	0.176492	1.4653e-07	3.02345e-06
Sar1a	4525.17	0.583645	0.114499	1.501e-07	3.09324e-06
Clec4a2	48.7366	-2.0747	0.442277	1.53679e-07	3.16302e-06
Timm17a	1166.17	0.72833	0.147163	1.57192e-07	3.23128e-06
Hopx	75.4216	-1.67149	0.354494	1.5807e-07	3.2372e-06
Nop16	405.163	0.835061	0.170548	1.57905e-07	3.2372e-06
Ripk3	337.965	0.825709	0.168374	1.58029e-07	3.2372e-06
Eef1g	9104.47	0.627279	0.125468	1.58584e-07	3.24367e-06
Itm2a	24088.7	-0.640361	0.128496	1.59258e-07	3.25341e-06
Dctpp1	705.999	0.713985	0.144223	1.63272e-07	3.33128e-06
Tpm2	5729.31	0.948578	0.195546	1.64057e-07	3.34315e-06
Hhipl1	527.578	0.861574	0.176077	1.64853e-07	3.35521e-06
Rnf126	492.415	0.892363	0.183763	1.67113e-07	3.39701e-06
Pgm5	21.1262	-2.66571	0.57034	1.6843e-07	3.41954e-06
C1qtnf9	74.6355	-3.94174	0.860063	1.69493e-07	3.43688e-06
Pabpc4	890.406	0.640256	0.128603	1.70232e-07	3.44337e-06
Cdh5	434.809	-4.56149	0.999526	1.70215e-07	3.44337e-06
Adamts19	40.4033	-2.06759	0.443999	1.74117e-07	3.51763e-06
P3h1	2196.7	0.643758	0.129572	1.74474e-07	3.52052e-06
Aspa	19.034	-2.49794	0.538252	1.7548e-07	3.53648e-06
Slc39a14	721.523	0.773201	0.157471	1.78072e-07	3.58433e-06
Calcoco1	349.233	-0.853108	0.175836	1.83369e-07	3.68644e-06
Rangap1	444.471	0.739364	0.1503	1.8374e-07	3.68938e-06
Gfer	562.307	0.751615	0.152942	1.85676e-07	3.72372e-06
Cope	3413.23	0.643729	0.12988	1.87011e-07	3.74592e-06
Xaf1	484.418	-0.808034	0.166084	1.89085e-07	3.78284e-06
Klhl4	14.0045	-3.42231	0.734849	1.89398e-07	3.78451e-06
Xpnpep1	1021.85	0.693784	0.14082	1.90449e-07	3.80089e-06
Park7	3822.23	0.591299	0.118758	1.93278e-07	3.85267e-06
Loxl3	1841.11	0.585703	0.117499	1.96435e-07	3.91086e-06
Timm8a1	538.755	0.765988	0.156535	2.02155e-07	4.01988e-06
Fam43a	203.762	-0.930132	0.193217	2.03842e-07	4.04852e-06
Ptprc	92.5201	-1.72971	0.370188	2.04261e-07	4.05196e-06
Plod3	1230.2	0.649798	0.131801	2.08809e-07	4.13719e-06
Il1b	105.3	-1.39843	0.297261	2.13229e-07	4.21968e-06
Cisd1	820.154	0.816257	0.168177	2.15736e-07	4.26416e-06
Cebpd	4964.92	-0.891257	0.185319	2.18808e-07	4.31969e-06
Csrp1	2175.14	0.819887	0.169315	2.21415e-07	4.36591e-06
Eef1akmt1	851.299	0.728864	0.149256	2.23694e-07	4.40556e-06
Sertad1	1258.81	0.637829	0.129544	2.24666e-07	4.41942e-06
Fhl2	1228.4	0.610541	0.12372	2.29659e-07	4.51225e-06
Rassf3	146.273	-1.1634	0.246039	2.30477e-07	4.5229e-06
Mvk	290.911	0.961998	0.20126	2.32495e-07	4.55708e-06
Amotl2	1306.72	0.752798	0.154744	2.3413e-07	4.58366e-06
Tspan6	2041.53	0.679606	0.138833	2.34877e-07	4.59281e-06
Irf1	1622.28	-0.65073	0.133014	2.46616e-07	4.81662e-06
G6pc3	392.239	0.794538	0.164396	2.47996e-07	4.83671e-06
Rasgrf2	13.4123	-3.19194	0.697943	2.48232e-07	4.83671e-06
Marf1	395.107	-0.849673	0.177054	2.54923e-07	4.96119e-06
Tgfbr3	1173.54	-0.622281	0.126998	2.5839e-07	5.02273e-06
Zfp185	301.744	1.0615	0.223738	2.68352e-07	5.2102e-06
Wdr18	452.59	0.815964	0.169944	2.6891e-07	5.21489e-06
C77080	175.683	-1.12419	0.239838	2.69691e-07	5.22388e-06
Gnasas1	37.447	-1.78133	0.388404	2.70566e-07	5.22851e-06
C1ra	1219.93	-0.965852	0.203883	2.7026e-07	5.22851e-06
Psmb5	2969.96	0.587927	0.119227	2.73928e-07	5.28106e-06
Fam98a	627.767	0.915745	0.192349	2.73643e-07	5.28106e-06
Vcl	2073.52	0.934612	0.196565	2.77289e-07	5.3396e-06
Adamts8	61.9565	1.55641	0.336582	2.89154e-07	5.56156e-06
Pdia3	11651.6	0.738064	0.153072	2.89518e-07	5.56207e-06
Syt13	6.82665	-7.601	2.77554	2.90647e-07	5.57723e-06
Nudt19	454.184	0.740947	0.153956	2.96854e-07	5.68308e-06
Flrt1	24.0594	-2.33629	0.515309	2.96724e-07	5.68308e-06
Scube2	572.294	0.734734	0.152668	3.02849e-07	5.78499e-06
Xbp1	2266.26	0.545227	0.110818	3.03233e-07	5.78499e-06
Klhl6	19.6839	-2.44205	0.538961	3.03214e-07	5.78499e-06
Pla2g7	63.4264	-1.96933	0.433777	3.09167e-07	5.89137e-06
1810055G02Rik	717.643	0.64231	0.132271	3.11152e-07	5.92233e-06
Cxcl3	57.1358	1.6793	0.365056	3.20462e-07	6.09249e-06
A630023A22Rik	44.0429	2.07634	0.447903	3.21672e-07	6.10842e-06
Irgm2	193.698	-0.95418	0.202824	3.26548e-07	6.18979e-06
Vdr	59.8743	1.69137	0.364815	3.26709e-07	6.18979e-06
Ly6h	818.172	-1.88362	0.415689	3.28614e-07	6.2187e-06
Ndufab1	2767.57	0.593004	0.121537	3.29059e-07	6.21996e-06
Snai2	567.639	-0.6908	0.143322	3.30085e-07	6.23221e-06
Ccdc88c	35.2291	-2.1163	0.467737	3.34199e-07	6.30265e-06
Dynll1	9128.35	0.53405	0.10885	3.34635e-07	6.30305e-06
Ebf1	5869.33	-0.595425	0.122448	3.34987e-07	6.30305e-06
Dnajc3	3451.55	0.680139	0.141049	3.35604e-07	6.30744e-06
Fabp5	8547.33	1.88026	0.412421	3.41023e-07	6.40198e-06
Slc25a27	79.8356	-1.30398	0.283247	3.4363e-07	6.44355e-06
Rassf1	1253.6	0.617599	0.127619	3.60096e-07	6.74462e-06
Timm23	2215.28	0.608621	0.125592	3.62558e-07	6.78302e-06
Klf5	84.7621	-1.26117	0.27501	3.66039e-07	6.83258e-06
3300005D01Rik	71.6841	1.56136	0.341802	3.65819e-07	6.83258e-06
Rem1	181.466	-1.0408	0.224448	3.77807e-07	7.04426e-06
Steap1	136.851	1.04065	0.222756	3.7987e-07	7.0747e-06
Ralgds	354.281	-0.813429	0.172251	3.86051e-07	7.18169e-06
Slc35g2	91.1085	1.37101	0.298243	3.89104e-07	7.2303e-06
Zbtb20	6401.19	-0.581328	0.120334	4.01248e-07	7.44755e-06
Pin1	1009.45	0.648122	0.134843	4.03904e-07	7.47996e-06
Ghr	1060.92	-0.620264	0.128869	4.03489e-07	7.47996e-06
Tgtp2	13.412	-3.30725	0.739535	4.05268e-07	7.49678e-06
Ncl	6377.38	0.546269	0.112554	4.17178e-07	7.70843e-06
Stxbp6	120.433	-1.38212	0.304745	4.19802e-07	7.74819e-06
Ebp	1016.86	0.78814	0.167029	4.2653e-07	7.86355e-06
Ehd1	1253.14	0.600446	0.124782	4.30322e-07	7.92457e-06
Hmgcr	634.607	0.831422	0.176468	4.30811e-07	7.92471e-06
Slc20a1	630.264	0.923021	0.197357	4.32379e-07	7.94466e-06
Tcp1	2154.9	0.543162	0.112037	4.33086e-07	7.94878e-06
Txnl4a	1720.23	0.628938	0.13097	4.33961e-07	7.95595e-06
Nxph4	70.1222	1.4279	0.311718	4.36358e-07	7.98975e-06
Slc5a3	385.695	0.747583	0.157626	4.36776e-07	7.98975e-06
Mmp23	3391.18	0.669677	0.140314	4.45562e-07	8.1414e-06
Pvalb	30.9211	-2.67651	0.602792	4.4674e-07	8.15387e-06
Eno1b	52.0003	1.91067	0.425799	4.51455e-07	8.2308e-06
Yif1a	1910.5	0.676526	0.142166	4.56317e-07	8.31023e-06
Llph	1575.48	0.574971	0.119287	4.57494e-07	8.32245e-06
Sept6	402.557	-0.714429	0.150746	4.60939e-07	8.37585e-06
P3h4	1328.63	0.675677	0.142043	4.62477e-07	8.39453e-06
Mvd	113.01	1.26074	0.275656	4.63954e-07	8.41205e-06
Gata2	18.9295	-2.52739	0.566255	4.7158e-07	8.5409e-06
Spats2l	935.202	-0.761148	0.161779	4.72481e-07	8.5478e-06
Gimap8	11.0364	-5.57987	1.15894	4.74173e-07	8.56898e-06
Dbnl	868.418	0.617367	0.129062	4.78092e-07	8.63032e-06
Rab5if	2071.45	0.58901	0.122478	4.80047e-07	8.65611e-06
Ryk	1828.74	0.560214	0.116307	4.81587e-07	8.67436e-06
Zc3hav1	735.192	-0.61315	0.128222	4.84713e-07	8.72112e-06
Map3k7cl	93.6819	1.64047	0.368509	4.90002e-07	8.80665e-06
Il1r1	1113.3	0.683304	0.144196	5.01338e-07	9.00055e-06
Gadd45gip1	1113.9	0.668347	0.140794	5.03775e-07	9.03443e-06
Lap3	1120.11	0.646471	0.136024	5.18248e-07	9.28386e-06
Aspn	31181.3	0.546641	0.113842	5.19032e-07	9.2878e-06
Ppp1r11	1030.19	0.673908	0.14234	5.27675e-07	9.4322e-06
Pebp1	4810.59	0.565635	0.117922	5.31298e-07	9.48664e-06
Timm13	4206.31	0.615552	0.129146	5.33369e-07	9.51328e-06
Ephb3	657.481	0.707976	0.150059	5.33961e-07	9.51353e-06
Fez1	169.813	-0.972987	0.212137	5.41074e-07	9.61942e-06
Gm12002	11.9649	-3.86974	0.875309	5.40901e-07	9.61942e-06
Lsm4	2003.7	0.597159	0.124984	5.53713e-07	9.83348e-06
Cxcr4	69.8744	-1.65265	0.369962	5.71202e-07	1.01331e-05
Plek	156.15	-1.34163	0.298522	5.82067e-07	1.03148e-05
D130058E05Rik	88.2392	1.47917	0.332409	5.93901e-07	1.05131e-05
Frmd4a	567.37	-0.739983	0.158635	6.15162e-07	1.08428e-05
Noc2l	425.135	0.77171	0.165667	6.15002e-07	1.08428e-05
Zfp36l1	8065.86	-0.583618	0.122922	6.14161e-07	1.08428e-05
Tmem252	11.8127	-3.77806	0.847326	6.14962e-07	1.08428e-05
Btg3	919.387	0.666503	0.141586	6.19855e-07	1.09138e-05
Mthfd1l	127.019	1.236	0.272607	6.29617e-07	1.10739e-05
Nbas	407.366	0.696555	0.148618	6.3264e-07	1.11151e-05
Cald1	11895.1	0.539176	0.113031	6.4095e-07	1.12371e-05
Nnmt	3273.65	0.601643	0.127087	6.40851e-07	1.12371e-05
Wdfy2	201.21	-0.86792	0.188697	6.48364e-07	1.1355e-05
Rrp1b	244.84	0.927646	0.20281	6.65808e-07	1.16481e-05
Fbxo17	301.134	0.840334	0.182762	6.83036e-07	1.19368e-05
Psmc4	1240.28	0.701244	0.150546	6.91217e-07	1.20669e-05
5033430I15Rik	82.2765	1.28286	0.286004	6.93901e-07	1.2101e-05
Mrps34	958.822	0.669315	0.1431	7.15423e-07	1.24631e-05
Notch3	224.565	-1.10416	0.245037	7.16785e-07	1.24736e-05
Lurap1l	499.636	0.777014	0.167978	7.27552e-07	1.26476e-05
Cxcl9	1750.87	-0.907298	0.199372	7.32273e-07	1.27162e-05
Psap	6928.83	-0.524665	0.111696	7.48461e-07	1.29836e-05
Tshz3	487.462	-0.738422	0.159487	7.50468e-07	1.30047e-05
Pclaf	938.272	0.6836	0.14696	7.53476e-07	1.30431e-05
Pfn1	11605.9	0.589652	0.125321	7.64578e-07	1.32213e-05
Thyn1	400.071	0.773004	0.167774	7.66206e-07	1.32356e-05
AW549877	461.413	-0.69885	0.150521	7.69574e-07	1.32798e-05
Pole4	1112.43	0.602454	0.128441	7.80581e-07	1.34372e-05
Rras2	164.602	1.12519	0.249982	7.81148e-07	1.34372e-05
Irf9	387.253	-0.701595	0.151455	7.79754e-07	1.34372e-05
Il16	37.6533	-1.61886	0.370005	7.82473e-07	1.34459e-05
Ptafr	40.3393	-2.16508	0.498996	7.94596e-07	1.364e-05
Col6a3	28561	-0.538462	0.114264	8.09033e-07	1.38734e-05
Ppib	27319.3	0.569925	0.121277	8.13014e-07	1.39271e-05
Acbd3	2284.41	0.60753	0.129738	8.15476e-07	1.39547e-05
Ostf1	2076.78	0.575834	0.122337	8.1844e-07	1.39909e-05
Lilrb4a	62.7726	-1.54532	0.351846	8.22457e-07	1.4045e-05
Eif1ax	2012.24	0.61429	0.131427	8.35705e-07	1.42564e-05
D330050G23Rik	77.5198	-1.31792	0.299801	8.37551e-07	1.42731e-05
Nos3	31.6853	-1.91825	0.444709	8.39125e-07	1.42851e-05
Lcp2	28.7353	-2.04912	0.473677	8.46619e-07	1.43978e-05
Jagn1	648.031	0.676568	0.145932	8.52644e-07	1.44853e-05
Slf2	418.286	-0.716675	0.155399	8.56128e-07	1.45294e-05
Gbp9	21.7776	-2.4431	0.571286	8.84387e-07	1.49936e-05
Fignl2	65.353	-1.32495	0.302166	8.91926e-07	1.51058e-05
Card10	46.8386	-1.6217	0.374678	9.02282e-07	1.52655e-05
Cox5a	3804.02	0.60924	0.130636	9.05305e-07	1.53009e-05
Lmna	8884.71	0.563828	0.120384	9.12391e-07	1.53976e-05
Ctns	127.426	-1.08753	0.244175	9.12903e-07	1.53976e-05
Slc7a1	219.874	0.952458	0.211025	9.18372e-07	1.5474e-05
D430019H16Rik	40.3678	-1.69115	0.390786	9.58121e-07	1.61272e-05
Tmod2	370.609	-0.704061	0.153581	9.73555e-07	1.63703e-05
Wipf1	1013.66	-0.611324	0.131814	9.88751e-07	1.66088e-05
Tcn2	633.314	-0.669219	0.145562	1.00067e-06	1.67918e-05
Tmcc3	227.835	-0.803281	0.177229	1.01403e-06	1.69987e-05
Rala	1809.48	0.577207	0.123952	1.02168e-06	1.70972e-05
Arhgef28	294.428	0.798716	0.175937	1.02198e-06	1.70972e-05
Ppia	29488.6	0.58856	0.126787	1.03679e-06	1.73272e-05
Hcst	29.5355	-2.24082	0.526415	1.04201e-06	1.73967e-05
Notch2	673.574	-0.749496	0.164773	1.06357e-06	1.77388e-05
Fam124a	98.2744	-1.08639	0.246719	1.06793e-06	1.77935e-05
Lman1	5709.6	0.531128	0.11375	1.07216e-06	1.78458e-05
Mmp16	282.915	-0.960271	0.215793	1.0774e-06	1.79149e-05
Gpc3	1477.05	-0.754601	0.166236	1.08031e-06	1.79451e-05
Uchl3	594.871	0.694345	0.151614	1.08499e-06	1.80047e-05
Fbn1	15582.9	0.526726	0.112013	1.0928e-06	1.81159e-05
Hspa4	1494.82	0.623783	0.135315	1.10383e-06	1.82805e-05
Klhl13	768.927	-0.601256	0.130214	1.10812e-06	1.8333e-05
Fst	1061.99	0.862339	0.191952	1.11492e-06	1.8427e-05
Mrps7	1057.75	0.678946	0.148474	1.11728e-06	1.84474e-05
Epb41l4aos	436.763	-0.794387	0.176445	1.13578e-06	1.87342e-05
N4bp3	49.0886	-1.53581	0.358156	1.1397e-06	1.87799e-05
Fhl1	619.675	-0.71885	0.158301	1.14867e-06	1.89088e-05
Ttll5	319.104	0.757732	0.167375	1.15654e-06	1.90193e-05
AC149090.1	374.159	-0.711788	0.156533	1.17313e-06	1.92729e-05
Thop1	282.108	0.853528	0.190586	1.17606e-06	1.93016e-05
Rac2	49.109	-1.55342	0.36092	1.19339e-06	1.95665e-05
Dctn3	1854.66	0.591301	0.128295	1.20712e-06	1.9772e-05
Pafah1b3	1051.94	0.625272	0.136177	1.21467e-06	1.98758e-05
Gm26812	30.6349	2.47353	0.568994	1.23661e-06	2.02147e-05
Ube2s	4260.08	0.547977	0.118391	1.25184e-06	2.04434e-05
Zcchc17	1039.54	0.568081	0.123185	1.27964e-06	2.0856e-05
Rrp7a	486.418	0.713626	0.15767	1.27879e-06	2.0856e-05
Pvr	460.814	0.695244	0.153084	1.29955e-06	2.11596e-05
Il10rb	278.286	-0.756372	0.16848	1.30915e-06	2.12947e-05
Jarid2	534.788	-0.750679	0.16676	1.31815e-06	2.142e-05
Grn	3997.08	-0.535743	0.116066	1.32614e-06	2.15286e-05
Actn1	2704.37	0.734961	0.162935	1.3276e-06	2.15309e-05
Cpxm1	5825.41	-0.67636	0.149206	1.3434e-06	2.17657e-05
Scara5	213.466	-1.26633	0.294202	1.34572e-06	2.17819e-05
C230038L03Rik	14.4188	-2.67235	0.63548	1.37831e-06	2.22856e-05
Cavin3	5024.91	0.639112	0.140529	1.37955e-06	2.22856e-05
Apold1	78.6935	-1.41965	0.330312	1.38846e-06	2.24075e-05
Cox18	321.747	0.739477	0.164505	1.39067e-06	2.24211e-05
Smarca2	1674.25	-0.514221	0.111332	1.41184e-06	2.27402e-05
Sft2d2	261.453	-0.796071	0.178369	1.42642e-06	2.29526e-05
Palld	4160.35	0.792058	0.176282	1.4513e-06	2.333e-05
Pi15	279.055	-0.859403	0.19416	1.48656e-06	2.38736e-05
Fjx1	1054.28	0.78033	0.175237	1.4998e-06	2.40627e-05
Adpgk	372.961	0.713794	0.158548	1.50621e-06	2.41419e-05
Cct6a	2187.32	0.549588	0.11936	1.50879e-06	2.41598e-05
Adamtsl3	489	0.752922	0.168599	1.51186e-06	2.41854e-05
Tmem255b	17.8644	-2.53871	0.612626	1.52033e-06	2.42972e-05
Gzma	10.2448	-4.84752	1.10647	1.52639e-06	2.43652e-05
Prdx4	5342.07	0.557793	0.121662	1.52755e-06	2.43652e-05
Cdc42ep5	1902	0.583907	0.127954	1.53109e-06	2.4398e-05
2310010J17Rik	266.368	-0.970317	0.222701	1.57723e-06	2.5109e-05
Ifitm1	42.9849	-1.62878	0.386434	1.58516e-06	2.52108e-05
Rrbp1	20016.9	0.587125	0.128612	1.59819e-06	2.53935e-05
Zfas1	1526.95	-0.670392	0.149186	1.62744e-06	2.58332e-05
Fuca2	669.435	-0.679784	0.151598	1.67383e-06	2.6544e-05
Uqcrq	4083.04	0.565352	0.12482	1.68415e-06	2.66819e-05
AI413582	260.903	-0.782593	0.177125	1.7413e-06	2.75608e-05
Rpn1	3223.51	0.570061	0.125401	1.74832e-06	2.76454e-05
Fry	70.2336	-1.33269	0.313463	1.77785e-06	2.80853e-05
Plaat1	35.477	1.969	0.465849	1.80518e-06	2.84896e-05
Shmt2	310.212	0.775012	0.174845	1.81207e-06	2.8571e-05
Timp4	19.7116	-2.80069	0.681788	1.84782e-06	2.91067e-05
Asb4	111.693	-1.06292	0.248119	1.87354e-06	2.94837e-05
Sipa1	362.592	-0.726623	0.164144	1.89435e-06	2.97826e-05
Eya1	15.6825	-2.80818	0.680328	1.89959e-06	2.98364e-05
Cyyr1	64.8429	-4.30672	1.07306	1.90204e-06	2.98464e-05
Surf4	4493.92	0.509753	0.111674	1.91423e-06	2.99805e-05
Mybbp1a	683.381	0.697684	0.156888	1.914e-06	2.99805e-05
Mamdc2	70.9266	-1.18589	0.279089	1.92184e-06	3.0071e-05
Ftsj3	345.438	0.759197	0.171891	1.9363e-06	3.02501e-05
Gm21188	20.7094	-2.64333	0.646578	1.93697e-06	3.02501e-05
Cfl1	7632.67	0.51065	0.111802	1.94723e-06	3.03816e-05
Phgdh	534.901	0.865143	0.19807	1.9537e-06	3.04536e-05
Atcayos	56.4505	1.51301	0.357911	2.02511e-06	3.15369e-05
Cct2	2839.37	0.496787	0.108968	2.03322e-06	3.16034e-05
Prr7	550.737	0.753516	0.171396	2.03317e-06	3.16034e-05
Ccdc107	826.233	0.643015	0.144	2.04088e-06	3.16924e-05
Ubfd1	1054.76	0.610911	0.136324	2.05757e-06	3.19215e-05
Slfn5	1608.06	-0.733452	0.166328	2.06043e-06	3.19357e-05
Rsl1d1	1023.7	0.603381	0.134337	2.0699e-06	3.20523e-05
D630003M21Rik	68.7281	-1.39569	0.333665	2.08184e-06	3.22068e-05
Grina	800.398	-0.672262	0.151394	2.0858e-06	3.22378e-05
Dnah7b	43.8797	-1.52412	0.365053	2.09394e-06	3.23332e-05
Hcls1	43.8652	-1.66616	0.401545	2.22468e-06	3.43197e-05
Slc35a2	853.979	0.630889	0.141608	2.22767e-06	3.43337e-05
Comt	1762.94	0.658008	0.148334	2.23493e-06	3.44133e-05
Gps1	889.357	0.613414	0.137436	2.24888e-06	3.45958e-05
Wfdc1	75.4203	-1.69274	0.412581	2.27355e-06	3.49426e-05
Hhip	14.3975	-2.77066	0.676462	2.28604e-06	3.51017e-05
Prkcsh	1410.42	0.536196	0.11891	2.29938e-06	3.52736e-05
Mrps12	1188.27	0.639352	0.144001	2.33746e-06	3.58243e-05
Fcgr1	36.1041	-2.22484	0.546377	2.37897e-06	3.64266e-05
Stip1	691.196	0.645448	0.145702	2.38707e-06	3.65166e-05
Cdc14a	175.266	-0.888983	0.206599	2.3964e-06	3.65912e-05
Ceacam1	10.987	-3.68045	0.905797	2.39484e-06	3.65912e-05
Cd200	468.777	-0.66987	0.15184	2.44552e-06	3.73066e-05
Lama2	1655.92	-0.789106	0.181774	2.45167e-06	3.73659e-05
Actr1b	1030.57	0.551031	0.123029	2.48096e-06	3.77771e-05
Tnxb	1029.9	-1.9103	0.469355	2.50728e-06	3.81426e-05
Mien1	1659.2	0.617375	0.139191	2.51344e-06	3.81657e-05
Bysl	157.55	0.934314	0.217425	2.5123e-06	3.81657e-05
Ap1s1	1228.12	0.583859	0.130917	2.52573e-06	3.8317e-05
Clec12a	51.9913	-1.85986	0.453571	2.53066e-06	3.83564e-05
Irgm1	348.678	-0.985564	0.232182	2.59038e-06	3.92254e-05
Acot7	305.811	0.745699	0.171178	2.63497e-06	3.98535e-05
Inpp4b	34.5457	-1.62617	0.395207	2.63671e-06	3.98535e-05
Adh1	108.914	-1.47474	0.357881	2.65556e-06	4.01017e-05
Syne2	310.18	-0.764829	0.176319	2.66622e-06	4.02112e-05
Asah2	237.086	-0.737272	0.169349	2.6677e-06	4.02112e-05
Slc38a10	2031.84	0.556584	0.124584	2.67153e-06	4.02319e-05
Cd320	566.782	0.696281	0.159106	2.68403e-06	4.03832e-05
Cd151	268.983	-0.722057	0.165914	2.71424e-06	4.08004e-05
Nol3	247.834	0.820761	0.190274	2.71812e-06	4.08215e-05
Nubp1	450.637	0.751511	0.17327	2.78833e-06	4.18376e-05
Slc35b1	1097.86	0.707865	0.162412	2.85507e-06	4.28001e-05
Npr3	52.2367	1.64188	0.401045	2.86674e-06	4.29358e-05
Ltbp1	927.17	0.717193	0.164896	2.90074e-06	4.34055e-05
Capn6	1681.66	-0.6174	0.140228	2.91237e-06	4.35399e-05
Polr3k	651.358	0.649037	0.147834	2.95913e-06	4.41989e-05
Ehd2	1106.06	-0.61994	0.141214	2.9856e-06	4.45435e-05
Tbcel	239.545	-0.758309	0.175618	2.98762e-06	4.45435e-05
Svbp	2980.29	0.575885	0.130152	2.99295e-06	4.45825e-05
9130401M01Rik	817.995	0.621512	0.141641	3.09496e-06	4.60602e-05
Creb3	1114.83	0.611893	0.139528	3.17918e-06	4.72709e-05
Calu	7462	0.466381	0.103975	3.20646e-06	4.76334e-05
Egfros	64.8588	-1.2221	0.296323	3.21126e-06	4.76617e-05
Pard3b	299.587	-0.697749	0.161198	3.222e-06	4.7778e-05
Zfp131	604.254	0.628309	0.143594	3.28443e-06	4.86599e-05
Igdcc4	525.045	-0.624834	0.142857	3.29796e-06	4.88164e-05
Rhou	218.982	0.855359	0.201266	3.33597e-06	4.93049e-05
Tgfbi	1310.47	-0.683976	0.157892	3.33696e-06	4.93049e-05
Adgre1	76.9513	-1.51218	0.371638	3.3764e-06	4.98428e-05
Slc12a6	244.384	-0.816302	0.191519	3.40118e-06	5.01635e-05
Gstm1	676.96	-0.626253	0.143929	3.40933e-06	5.02388e-05
G3bp1	1496.65	0.554519	0.12569	3.44092e-06	5.06136e-05
Txndc16	281.628	-0.759002	0.177109	3.44083e-06	5.06136e-05
Cacybp	1361.48	0.580295	0.13239	3.53168e-06	5.19022e-05
Dut	1195.68	0.623163	0.142833	3.53575e-06	5.19048e-05
Lrrn4cl	464.226	-0.81778	0.192834	3.53817e-06	5.19048e-05
Gigyf1	323.239	-0.702445	0.162993	3.57e-06	5.23089e-05
Mars	293.588	0.766624	0.179084	3.57208e-06	5.23089e-05
Hspa12a	123.066	-0.943029	0.225565	3.59244e-06	5.25603e-05
Hic1	1062.23	-0.646952	0.149239	3.59674e-06	5.25764e-05
Dok1	700.809	0.700622	0.16279	3.61196e-06	5.2752e-05
Pdk3	388.132	0.69007	0.159949	3.61777e-06	5.27899e-05
Eif4a1	5710.12	0.574552	0.131294	3.67793e-06	5.36202e-05
Dph3	1793.64	0.512366	0.115882	3.72675e-06	5.42838e-05
Rwdd4a	385.853	0.649085	0.149885	3.74384e-06	5.44845e-05
Brdt	147.59	-0.977807	0.235169	3.79906e-06	5.52018e-05
Slc1a6	49.4151	1.8496	0.462098	3.80249e-06	5.52018e-05
Trmt61a	112.499	1.11783	0.270759	3.8032e-06	5.52018e-05
Cited2	1221.7	0.559772	0.127641	3.82864e-06	5.54731e-05
Sec11c	770.051	0.680037	0.157644	3.82554e-06	5.54731e-05
Ecscr	970.061	0.654844	0.151733	3.85344e-06	5.57833e-05
C1qbp	1375.4	0.60275	0.13847	3.90116e-06	5.64245e-05
Pde7a	322.875	0.759882	0.178212	3.92618e-06	5.67365e-05
Hnrnpab	3484.06	0.533793	0.121517	3.94686e-06	5.69852e-05
Ch25h	40.4492	-1.68336	0.421591	3.95282e-06	5.70212e-05
Jag2	19.1054	-2.06386	0.521127	4.00867e-06	5.77762e-05
Kcna5	8.40907	-4.58776	1.10102	4.0439e-06	5.82329e-05
Flt4	13.506	-2.67823	0.680503	4.05663e-06	5.8365e-05
Mir100hg	555.386	-0.597591	0.137747	4.06407e-06	5.837e-05
Flna	3910.6	0.596579	0.137187	4.0618e-06	5.837e-05
Ezh1	191.027	-0.81155	0.192787	4.07344e-06	5.84025e-05
Arsk	279.543	-0.707611	0.16544	4.07295e-06	5.84025e-05
Trpc3	12.6366	-2.85048	0.725191	4.10128e-06	5.87504e-05
Ms4a6b	57.459	-1.83461	0.461957	4.10928e-06	5.88138e-05
Etl4	142.051	-0.926311	0.222134	4.12075e-06	5.89267e-05
Il15	54.1557	-1.26532	0.312119	4.19309e-06	5.99091e-05
Slc8b1	88.9608	-1.162	0.284501	4.23728e-06	6.04878e-05
Rars	663.163	0.589393	0.1359	4.24262e-06	6.05116e-05
Artn	36.0786	1.87302	0.463234	4.2727e-06	6.08878e-05
Gfra2	159.779	0.997117	0.239792	4.28744e-06	6.1045e-05
Pabpn1	2545.69	0.507649	0.114968	4.32932e-06	6.1588e-05
Tars	939.357	0.646844	0.150333	4.34921e-06	6.18174e-05
Golt1b	1381.75	0.542344	0.124278	4.3719e-06	6.20092e-05
Nsun2	527.547	0.708749	0.165883	4.3676e-06	6.20092e-05
Arap3	89.6572	-1.00819	0.244935	4.37402e-06	6.20092e-05
Trim12a	253.577	-0.769902	0.182681	4.438e-06	6.28621e-05
Gm16286	1314.91	0.55515	0.127575	4.44536e-06	6.29122e-05
Plekha6	39.9842	-1.63047	0.409242	4.46502e-06	6.31361e-05
Isg20	439.705	0.712207	0.167762	4.48843e-06	6.34126e-05
Gtf3c6	777.74	0.615268	0.142692	4.49616e-06	6.34672e-05
Ddost	3973.39	0.577287	0.133161	4.53013e-06	6.38919e-05
Nsmaf	280.543	-0.678148	0.159074	4.55402e-06	6.41738e-05
St6galnac3	8.06103	-4.48881	1.08863	4.56645e-06	6.42938e-05
Cyp2j9	40.8863	-1.50334	0.378767	4.70407e-06	6.61749e-05
Ppil1	394.324	0.740209	0.175218	4.71348e-06	6.62506e-05
Spty2d1	1513.4	0.529533	0.121616	4.78599e-06	6.72122e-05
Smpdl3b	87.6511	1.13906	0.279426	4.79209e-06	6.72406e-05
Pdrg1	908.329	0.611018	0.142104	4.82798e-06	6.76863e-05
Sema6a	194.987	-0.797402	0.190287	4.83252e-06	6.76923e-05
Aldh1l2	217.807	0.853943	0.20498	4.8389e-06	6.77239e-05
Luzp1	1270.22	0.543274	0.125292	4.8816e-06	6.82635e-05
Enpp1	1245.25	0.689504	0.162164	4.88645e-06	6.82734e-05
Tgfb1i1	1015.11	0.529355	0.121839	4.97313e-06	6.94255e-05
Pik3r3	355.465	0.863284	0.206998	5.00724e-06	6.98423e-05
Gcnt2	97.3367	-1.06645	0.261862	5.06305e-06	7.05609e-05
Alg5	1510.38	0.560819	0.129792	5.08044e-06	7.07432e-05
Acsf2	119.614	-1.01714	0.249983	5.16083e-06	7.1802e-05
Fkbp4	997.535	0.599195	0.139829	5.29658e-06	7.36106e-05
Enpp5	107.542	-1.01163	0.248695	5.29978e-06	7.36106e-05
Srp72	1990.72	0.489252	0.112321	5.31923e-06	7.38183e-05
Psmg1	541.648	0.62848	0.147309	5.33468e-06	7.39704e-05
Thsd1	69.8301	-1.15433	0.287508	5.37188e-06	7.44234e-05
Psmd6	1482.32	0.527885	0.122029	5.40255e-06	7.47853e-05
Bud23	466.163	0.653146	0.153997	5.46192e-06	7.55435e-05
Lsm6	1598.9	0.524648	0.121289	5.49336e-06	7.59145e-05
Tbc1d1	359.969	0.678194	0.160417	5.50929e-06	7.60708e-05
Bace2	412.834	0.775782	0.186195	5.51631e-06	7.61038e-05
Spc24	482.024	0.672404	0.158921	5.55244e-06	7.64739e-05
Gnpnat1	750.464	0.605697	0.141899	5.55017e-06	7.64739e-05
Zer1	219.238	-0.731035	0.174727	5.57297e-06	7.66925e-05
Cxcl12	3718.02	-0.515038	0.11917	5.60374e-06	7.70514e-05
Pcsk6	501.945	0.657735	0.155556	5.64991e-06	7.76214e-05
Mme	532.037	-0.647052	0.152848	5.72575e-06	7.85976e-05
Cytip	60.3223	-1.81388	0.463743	5.84694e-06	8.01942e-05
Psmd12	1376.04	0.57261	0.133903	5.85682e-06	8.02628e-05
Zfp467	104.596	-1.00538	0.248968	5.93614e-06	8.12821e-05
Klhdc8a	23.7031	2.39171	0.601881	6.0334e-06	8.25452e-05
Kcns3	23.6633	-1.92597	0.500783	6.13475e-06	8.38619e-05
Adamts16	156.605	1.09376	0.271625	6.20828e-06	8.47966e-05
Tmed2	6617.57	0.46754	0.107708	6.22112e-06	8.49016e-05
Snx7	793.009	0.73717	0.177246	6.2314e-06	8.49713e-05
Sh3glb1	6635.53	0.497824	0.115569	6.29642e-06	8.57158e-05
Abcb1a	17.0985	-2.27983	0.591395	6.29571e-06	8.57158e-05
Apobec1	111.194	-0.953038	0.235148	6.31522e-06	8.59005e-05
Bmpr1b	163.993	0.93649	0.229595	6.48081e-06	8.80801e-05
Hsp90ab1	26702.4	0.464796	0.107326	6.53031e-06	8.86796e-05
Rrp15	448.502	0.648912	0.154635	6.72097e-06	9.11217e-05
Arl16	339.419	0.693269	0.166379	6.72123e-06	9.11217e-05
Reps2	127.095	-0.894987	0.220545	6.72872e-06	9.11481e-05
1110065P20Rik	1665.85	0.541544	0.126725	6.77639e-06	9.171e-05
Vars	492.356	0.588282	0.138801	6.78135e-06	9.171e-05
Iars	369.805	0.805458	0.196039	6.85314e-06	9.26047e-05
Ak4	108.229	1.38745	0.351398	6.87947e-06	9.28842e-05
Pgm3	617.319	0.586977	0.138845	7.01644e-06	9.45263e-05
Uba5	1332.69	0.553596	0.130189	7.01834e-06	9.45263e-05
Firre	99.0136	-0.997327	0.248907	7.01428e-06	9.45263e-05
Ptgr1	418.28	0.682873	0.164092	7.09647e-06	9.55004e-05
Ccl11	944.53	-2.10827	0.556975	7.11722e-06	9.57013e-05
Tmem37	58.0079	-1.43559	0.370083	7.13673e-06	9.58141e-05
Armc6	169.904	0.838415	0.205454	7.13726e-06	9.58141e-05
Rfxap	627.335	0.610626	0.145088	7.1812e-06	9.6246e-05
Napsa	18.0375	-2.23256	0.583185	7.18419e-06	9.6246e-05
Kank3	65.4471	-1.13326	0.287103	7.18699e-06	9.6246e-05
Itga4	29.0581	-1.90698	0.495674	7.25819e-06	9.71203e-05
Ccr2	33.4099	-2.01545	0.52525	7.30123e-06	9.76168e-05
Mphosph10	325.155	0.743324	0.179882	7.33005e-06	9.78684e-05
Bnip3	1028.23	1.91724	0.500569	7.33195e-06	9.78684e-05
Fkbp10	3988.9	0.600861	0.142821	7.37598e-06	9.83763e-05
Vps13b	405.267	-0.618654	0.147711	7.42315e-06	9.89253e-05
Epb41	272.055	-0.699505	0.168853	7.48045e-06	9.96081e-05
Tenm2	18.4533	-2.42974	0.645969	7.6799e-06	0.000102181
Emc8	839.272	0.593575	0.141233	7.779e-06	0.000103416
Klrd1	13.3728	-3.08429	0.812941	7.8728e-06	0.000104579
Dtymk	1731.34	0.514644	0.120968	7.95462e-06	0.00010558
Pdzd11	747.926	0.583232	0.138727	7.97415e-06	0.000105754
Kctd5	363.792	0.733813	0.178296	8.13424e-06	0.00010779
Tlr3	145.796	-0.830793	0.205541	8.15942e-06	0.000108037
Trpm5	17.5311	-2.0971	0.553782	8.21194e-06	0.000108645
Tslp	127.796	-1.01414	0.256541	8.25273e-06	0.000109097
Nfu1	797.793	0.574196	0.136887	8.2851e-06	0.000109405
Nrgn	30.9418	-1.62785	0.427104	8.28939e-06	0.000109405
Ccdc85b	1730.53	0.600719	0.143804	8.3755e-06	0.000110453
Mrpl43	1249.86	0.55741	0.132432	8.38594e-06	0.000110502
Lyar	615.144	0.6124	0.146793	8.47559e-06	0.000111594
Ssna1	1417.19	0.534315	0.126614	8.56011e-06	0.000112617
AB124611	23.8869	-2.02127	0.535017	8.59881e-06	0.000113036
Fmnl1	28.1463	-1.69525	0.448449	8.69649e-06	0.000114228
Cox19	735.862	0.577498	0.138035	8.78388e-06	0.000115284
Mc5r	89.973	1.0938	0.278488	8.79432e-06	0.000115329
Ccdc85a	18.6677	-2.11785	0.565283	8.90897e-06	0.000116739
Dapk2	108.147	-1.26171	0.326963	8.95982e-06	0.000117312
Rere	689.431	-0.558864	0.133513	9.00861e-06	0.000117857
Tmem14c	3337.6	0.533958	0.127563	9.2183e-06	0.000120505
Zbtb46	84.3886	-1.00118	0.253979	9.34913e-06	0.000122118
Cavin1	2204.8	-0.585684	0.140836	9.38517e-06	0.000122491
Edn3	11.3404	-2.88027	0.770872	9.40473e-06	0.000122649
Trp53inp1	305.949	-0.922748	0.232222	9.45292e-06	0.00012318
Cmas	797.16	0.540852	0.1291	9.5248e-06	0.000124018
Ikzf4	103.814	-1.00716	0.256399	9.53904e-06	0.000124106
Snf8	1572.87	0.577493	0.13869	9.55427e-06	0.000124205
Twsg1	1039.62	-0.511242	0.121641	9.67401e-06	0.000125663
Vapa	2833.36	0.555373	0.132989	9.8457e-06	0.000127792
Syn2	25.4158	-1.92092	0.510981	9.87767e-06	0.000128106
Birc3	381.094	-0.615698	0.149091	9.93498e-06	0.000128748
Plekhh2	303.162	-0.729481	0.180359	1.00299e-05	0.000129876
Srsf3	3585.49	0.556162	0.133384	1.00494e-05	0.000130026
Vim	67123.1	0.529915	0.127353	1.01933e-05	0.000131784
Dhx29	295.414	0.777829	0.193667	1.02646e-05	0.000132601
4930481A15Rik	93.9952	-1.00919	0.257727	1.02913e-05	0.000132842
Oat	2956.74	0.559256	0.134151	1.03449e-05	0.000133429
Mmp2	9912.53	-0.550633	0.13215	1.03996e-05	0.000134029
Psma7	5650.68	0.544008	0.130595	1.04188e-05	0.000134137
Selenok	7022.1	0.525967	0.125798	1.04243e-05	0.000134137
Dnajc15	860.5	0.596434	0.144339	1.05006e-05	0.000135014
Gpx8	3979.9	0.502031	0.119612	1.05436e-05	0.00013546
Gja1	1434.57	-0.487993	0.116172	1.057e-05	0.000135693
Ifi44	202.009	-0.802572	0.201164	1.05977e-05	0.000135793
Cda	148.338	1.10655	0.285832	1.0592e-05	0.000135793
Tecr	1691.51	0.560635	0.133869	1.06107e-05	0.000135793
Csrnp1	1533.6	0.653647	0.159746	1.06098e-05	0.000135793
Ifit2	154.69	-0.957983	0.244641	1.0643e-05	0.0001361
Mrps24	2744.75	0.517228	0.123618	1.06526e-05	0.000136116
Dmpk	188.385	-0.781729	0.195086	1.06728e-05	0.000136269
Psmb3	2916.58	0.538275	0.129199	1.07097e-05	0.000136634
Ifi209	8.75969	-3.6115	0.961433	1.0852e-05	0.000138342
Zeb1	1483.12	-0.479389	0.114224	1.09611e-05	0.000139624
Sbno2	532.175	-0.569243	0.137757	1.10438e-05	0.000140542
Gas7	273.619	-1.0703	0.27711	1.10502e-05	0.000140542
Pln	8.5876	-3.58559	0.95628	1.12434e-05	0.000142888
Plxdc1	12.5872	-2.61167	0.705067	1.12913e-05	0.000143387
Ano1	12.5146	-2.76192	0.746095	1.13954e-05	0.000144597
Nova1	151.722	-0.825316	0.208111	1.14618e-05	0.000145327
Khk	65.4105	-1.11056	0.289357	1.16196e-05	0.000147215
Zyx	2631.4	0.689752	0.170502	1.16729e-05	0.000147776
Usp39	236.766	0.718777	0.178432	1.21259e-05	0.000153393
Eda	148.513	-0.85654	0.218065	1.21767e-05	0.000153917
Rex1bd	3675.24	0.627309	0.154092	1.23586e-05	0.000156097
Olfr558	10.1537	-3.42823	0.928108	1.23819e-05	0.00015627
Dnlz	1281.56	0.517183	0.124809	1.24022e-05	0.000156344
Retreg1	88.5296	-1.2757	0.33868	1.24067e-05	0.000156344
Tbx2	125.127	-1.00133	0.259103	1.25274e-05	0.000157743
Praf2	1554.43	0.537019	0.130106	1.25854e-05	0.000158352
Dennd6a	427.773	-0.666166	0.165262	1.2597e-05	0.000158378
Lsm3	938.595	0.520547	0.125804	1.26795e-05	0.000159171
Prpf31	331.218	0.68949	0.171357	1.26787e-05	0.000159171
Hbp1	843.875	-0.539468	0.130931	1.26984e-05	0.000159287
Prkch	73.3513	-1.07909	0.28125	1.29648e-05	0.000162505
Itgbl1	1747.65	0.685857	0.17065	1.29916e-05	0.000162681
Exosc4	844.796	0.654702	0.161746	1.30086e-05	0.000162681
Pfdn6	1175.93	0.525364	0.127238	1.30045e-05	0.000162681
Dock2	28.6121	-1.71067	0.461964	1.30737e-05	0.000163371
Egflam	36.7743	-1.51105	0.404431	1.31084e-05	0.000163681
Kit	11.7953	-2.69422	0.732987	1.31606e-05	0.000164208
Sec61a1	3176.29	0.52686	0.12771	1.31925e-05	0.000164353
Mlf2	2054.12	0.496128	0.119294	1.32022e-05	0.000164353
Siva1	2079.3	0.493409	0.118542	1.31973e-05	0.000164353
Trappc5	903.729	0.607082	0.149086	1.32123e-05	0.000164354
Per3	274.697	-0.881734	0.22592	1.32368e-05	0.000164534
Nfe2l3	28.9813	-1.68878	0.461408	1.33111e-05	0.000165333
Ube2j2	723.039	0.528207	0.128184	1.35274e-05	0.000167893
Prr5	543.484	0.565123	0.138261	1.3744e-05	0.000170453
Josd2	1054.84	0.519398	0.12595	1.37629e-05	0.000170559
Mrps26	1222.1	0.54006	0.131412	1.3814e-05	0.000171062
N4bp2l1	42.2476	-1.44046	0.388583	1.41128e-05	0.000174631
Cdh19	24.5559	-1.69152	0.462164	1.42143e-05	0.000175755
Mrpl55	659.861	0.625804	0.155132	1.43812e-05	0.000177685
Ruvbl2	253.954	0.722255	0.182023	1.4395e-05	0.000177722
Cd84	41.8873	-1.8507	0.506468	1.44122e-05	0.000177801
Me1	426.125	0.699736	0.175259	1.44583e-05	0.000178236
Unc93b1	595.435	-0.581043	0.142986	1.45086e-05	0.000178722
Gar1	487.757	0.725814	0.183042	1.46913e-05	0.000180702
Adamts17	277.08	-0.834359	0.214149	1.46869e-05	0.000180702
Hif1a	3994.34	0.680368	0.170244	1.47185e-05	0.000180901
Dtx3	1078.24	-0.588818	0.145385	1.4847e-05	0.000182344
Gm44752	60.7783	-1.31925	0.35597	1.48915e-05	0.00018271
Vtn	411.951	-0.811606	0.207872	1.4899e-05	0.00018271
Dera	533.886	0.597808	0.147756	1.50528e-05	0.000184376
Scara3	813.867	-0.666214	0.16693	1.50573e-05	0.000184376
Pex3	483.397	-0.640471	0.159883	1.51102e-05	0.000184886
Dennd2a	481.108	-0.619882	0.154262	1.52959e-05	0.000187019
Steap4	847.646	-0.75439	0.191754	1.53378e-05	0.000187392
Tbl2	292.376	0.676074	0.169316	1.5426e-05	0.00018833
Nr5a2	9.0725	-3.55057	0.985954	1.54776e-05	0.00018868
Rer1	4373.66	0.474263	0.115009	1.54739e-05	0.00018868
Tm4sf1	6696	0.559617	0.137761	1.56395e-05	0.000190512
Arhgap20	143.29	-1.06351	0.281584	1.56947e-05	0.000191043
Cir1	1005.96	-0.569195	0.140579	1.57122e-05	0.000191115
Kpnb1	1473.45	0.502409	0.12239	1.57371e-05	0.000191276
Galnt18	30.3992	-1.6093	0.443444	1.58873e-05	0.00019296
Lepr	21.6036	-1.94306	0.541858	1.61444e-05	0.000195937
Btg2	4954.62	0.520091	0.127311	1.61587e-05	0.000195967
Tbxa2r	224.102	0.948209	0.247508	1.62055e-05	0.000196388
Crim1	170.372	-0.86515	0.22349	1.62209e-05	0.00019643
Camk1d	136.765	-0.973835	0.255723	1.63532e-05	0.000197887
Ccdc86	273.418	0.678483	0.170842	1.6532e-05	0.000199903
Clu	204.664	-1.06267	0.282668	1.66028e-05	0.000200612
Magel2	8.19607	-5.01155	1.2842	1.66427e-05	0.000200946
Hsd17b11	588.8	-0.552114	0.136473	1.66811e-05	0.000200967
Hspb8	364.508	0.621411	0.155188	1.66709e-05	0.000200967
Mrpl53	1347.58	0.497665	0.12166	1.66611e-05	0.000200967
Rapgef3	35.2976	-1.41979	0.388239	1.67079e-05	0.000201143
Dnmt3a	478.106	-0.656642	0.165146	1.68613e-05	0.000202723
Epsti1	76.8789	-1.22598	0.32981	1.68761e-05	0.000202723
Hacd2	582.782	0.595901	0.148358	1.68738e-05	0.000202723
Hells	240.485	0.700278	0.177268	1.70857e-05	0.000205091
Kcnb1	73.5489	-1.09032	0.29197	1.73599e-05	0.000208078
Bend5	191.875	-0.871332	0.22701	1.73518e-05	0.000208078
Rpgrip1	291.001	-0.914652	0.238885	1.75342e-05	0.000210015
Rab2a	5924.36	0.445811	0.10809	1.77029e-05	0.00021188
Immt	1014.38	0.55834	0.138403	1.77683e-05	0.000212508
Ugcg	2002.58	0.715231	0.18055	1.78301e-05	0.000212969
Fgd2	18.9253	-1.92832	0.53917	1.78326e-05	0.000212969
Ifi27l2a	5195.36	-0.749186	0.192297	1.82021e-05	0.000217066
Mpnd	557.829	0.643495	0.162393	1.81951e-05	0.000217066
Cers4	265.672	-0.687139	0.174514	1.82417e-05	0.00021738
Eif4g1	2694.43	0.433932	0.105494	1.84543e-05	0.000219754
Tnfrsf21	57.2705	-1.15319	0.310355	1.84711e-05	0.000219795
Rps6kb1	925.619	0.494744	0.121574	1.84897e-05	0.000219858
A130023I24Rik	33.2655	1.6888	0.459125	1.85286e-05	0.000220161
Trappc4	1731.62	0.500573	0.123015	1.86199e-05	0.000221086
Pappa	403.112	0.747089	0.192031	1.87719e-05	0.00022273
Psma3	4495.13	0.508577	0.125624	1.88859e-05	0.000223921
Ptprg	350.56	-0.612528	0.153976	1.89278e-05	0.000224257
Snai1	435.162	0.659595	0.166706	1.90075e-05	0.000225038
Derl1	1844.3	0.486685	0.119398	1.90296e-05	0.000225138
Sult5a1	374.675	-0.847687	0.222168	1.95306e-05	0.000230899
Zfp41	62.6493	-1.06635	0.286475	1.97439e-05	0.000233253
Dmkn	15.1767	4.80146	1.32808	1.97841e-05	0.00023356
Tmem71	14.0091	-2.37942	0.675513	2.00405e-05	0.000236417
Atp5d	5550.84	0.487566	0.119947	2.00767e-05	0.000236674
Shb	149.431	0.903431	0.2383	2.01202e-05	0.000237018
Ppan	295.018	0.665955	0.16971	2.01813e-05	0.000237568
Sac3d1	230.026	0.718585	0.184293	2.02365e-05	0.000238047
Angptl4	1789.42	0.82662	0.216086	2.04185e-05	0.000240015
Fcgr4	14.3957	-2.77071	0.785525	2.0511e-05	0.000240904
Nat10	191.418	0.79244	0.205341	2.05234e-05	0.000240904
Aldh18a1	689.676	0.543517	0.135682	2.09293e-05	0.000245494
Pan2	131.893	-0.837302	0.21961	2.10593e-05	0.000246843
Mettl7a1	166.846	-0.809183	0.212024	2.11637e-05	0.00024789
Aen	219.19	0.717804	0.184705	2.14591e-05	0.000251171
Ptch1	159.223	-0.839486	0.22002	2.15247e-05	0.00025176
Pla2r1	140.714	-0.781107	0.203655	2.15851e-05	0.000252286
Psmb2	3115.71	0.530313	0.132586	2.21671e-05	0.000258832
Emilin1	4154.27	0.550616	0.138036	2.21891e-05	0.000258832
Amd1	278.527	0.697206	0.179346	2.21923e-05	0.000258832
Ube2f	706.338	0.533305	0.133504	2.22646e-05	0.000259491
Ube2n	1769.19	0.449367	0.110783	2.24437e-05	0.000261393
Adrm1	658.39	0.549127	0.138083	2.26178e-05	0.000263048
Gng10	3043.88	0.451111	0.111282	2.26081e-05	0.000263048
Dynlrb1	3322.67	0.448739	0.110814	2.27361e-05	0.00026415
Vkorc1	6294.64	0.480514	0.119461	2.27447e-05	0.00026415
Coa3	1710.68	0.503562	0.125449	2.28303e-05	0.000264957
Ppt1	815.132	-0.538679	0.135305	2.29245e-05	0.000265863
Avpi1	383.051	0.697256	0.179535	2.29738e-05	0.000266246
Gm29686	59.8114	1.2434	0.340055	2.30526e-05	0.000266972
Wfdc18	32.9917	1.69401	0.471369	2.31414e-05	0.000267682
Smoc2	5999.26	-0.637267	0.163128	2.31465e-05	0.000267682
Gcat	145.772	0.91642	0.243771	2.31848e-05	0.000267937
Rpn2	3781.28	0.493766	0.122872	2.32186e-05	0.000268139
Bola1	679.783	0.623237	0.159407	2.37496e-05	0.000274078
Nr2c2ap	240.88	0.709458	0.183674	2.3984e-05	0.000276589
1110008P14Rik	878.176	0.551063	0.139097	2.40694e-05	0.000277185
Bcl2a1d	31.4698	-1.55495	0.436661	2.40638e-05	0.000277185
Pdxp	51.9012	1.32216	0.361873	2.4381e-05	0.000280578
Sh2d3c	21.7723	-1.78598	0.511296	2.46956e-05	0.000284
Cd83	167.471	-2.38775	0.694386	2.47726e-05	0.000284686
Sorl1	14.7552	-2.29917	0.66103	2.48146e-05	0.00028497
C5ar1	36.0508	-1.54878	0.43575	2.49095e-05	0.000285859
Pop7	472.659	0.597646	0.1522	2.50382e-05	0.000287136
Rhbdf2	32.4368	-1.43411	0.403223	2.5264e-05	0.000289524
Guca1a	313.457	0.694545	0.180744	2.55604e-05	0.000292717
Rpl3	26580.4	0.513489	0.129126	2.57128e-05	0.000294257
Lrp8	36.3595	1.61365	0.446822	2.59085e-05	0.00029629
H2-Q6	92.0297	-1.1441	0.316756	2.59656e-05	0.000296737
Polr2e	1530.23	0.524972	0.132373	2.62834e-05	0.00030016
Ifrd2	173.599	0.766514	0.201709	2.65769e-05	0.000303301
Tkt	1003.56	0.548312	0.138939	2.66418e-05	0.000303831
Psmb6	3415.38	0.53719	0.135988	2.67853e-05	0.000305255
Sp110	177.95	-0.850614	0.228061	2.68967e-05	0.000306313
Lrrc32	153.068	-0.951184	0.258317	2.69324e-05	0.000306363
Casp4	438.049	-0.770452	0.203835	2.69383e-05	0.000306363
Nbl1	1666.95	-0.655901	0.170538	2.71993e-05	0.000308861
Tspo	3529.08	0.498622	0.126251	2.7182e-05	0.000308861
Gm34672	4.29223	-6.51616	2.80581	2.72143e-05	0.000308861
Atp5o	4893.2	0.477948	0.119763	2.74521e-05	0.00031113
Clic5	58.4756	-3.74025	1.12904	2.74358e-05	0.00031113
U2af1	1777.72	0.491971	0.12355	2.76409e-05	0.000313054
Cpxm2	1500.94	1.46441	0.41498	2.7829e-05	0.000314968
Mri1	595.673	0.597523	0.153425	2.78604e-05	0.000315106
Tbx3os1	21.1449	-1.7914	0.518758	2.80522e-05	0.000317058
Cyth3	1680.84	-0.525098	0.133304	2.81157e-05	0.000317339
Ahr	63.0338	-1.34341	0.380024	2.81001e-05	0.000317339
Gm9844	193.612	0.761616	0.201626	2.82234e-05	0.000318118
Abracl	4077.58	0.644864	0.166848	2.82221e-05	0.000318118
Wdr83os	1534.08	0.467042	0.117051	2.86298e-05	0.000322477
Psmc5	1652.77	0.551438	0.142907	2.86782e-05	0.000322801
Tpp1	564.162	-0.575102	0.147223	2.87266e-05	0.000323125
Sned1	282.266	-0.983962	0.269836	2.91969e-05	0.00032819
Homer1	393.703	0.645517	0.167501	2.94203e-05	0.000330476
Pitpnc1	170.737	-0.789098	0.210091	2.94498e-05	0.000330573
Phf10	648.951	0.5153	0.130643	2.94692e-05	0.000330573
Kera	56.7151	-1.60687	0.465261	2.96395e-05	0.000332031
Eef1d	6141.08	0.53743	0.136941	2.96214e-05	0.000332031
Adap2	31.9633	-1.61811	0.466218	2.99801e-05	0.000335618
Cys1	286.635	-0.715448	0.189091	3.01974e-05	0.000337821
Tgfb3	2315.07	0.432958	0.108063	3.02606e-05	0.000338297
Mrpl18	1643.66	0.507469	0.128787	3.08863e-05	0.000345058
Tmsb4x	63298.3	0.596759	0.154144	3.09523e-05	0.00034556
Wnt2	40.2212	1.58928	0.453946	3.11095e-05	0.00034704
Lamp2	5088.12	-0.416361	0.104093	3.11271e-05	0.00034704
Irf7	479.32	-0.905063	0.246644	3.1175e-05	0.000347339
4833403J16Rik	4.29306	-6.53542	2.82523	3.15955e-05	0.000351787
Atf4	2892.51	0.451842	0.112883	3.18701e-05	0.000354603
Clpp	818.605	0.593491	0.153698	3.2063e-05	0.000356508
Fam13c	355.199	0.649823	0.169853	3.21293e-05	0.000357004
Eif1	23472.2	0.46336	0.117118	3.23695e-05	0.00035943
Vcp	4581.51	0.442057	0.111199	3.24378e-05	0.000359946
Baiap2	676.064	0.713622	0.189023	3.27079e-05	0.000362698
Serf2	39101.2	0.543555	0.139577	3.28076e-05	0.000363559
Slfn2	181.573	-0.886318	0.241633	3.29076e-05	0.000364421
Psmc2	1132.84	0.566567	0.146462	3.32114e-05	0.000367538
Gpr176	131.381	1.05482	0.290164	3.32575e-05	0.000367801
Agbl3	236.471	0.690418	0.181714	3.34126e-05	0.000369268
Mak16	341.189	0.73155	0.194563	3.35439e-05	0.00037047
BC031181	1477.45	0.485471	0.123361	3.35921e-05	0.000370753
Cavin4	19.6883	2.42086	0.680969	3.39686e-05	0.000374657
Usp18	149.847	-0.854089	0.23281	3.4229e-05	0.000377023
Trim25	351.342	-0.602417	0.15687	3.42136e-05	0.000377023
Larp1b	213.725	0.713972	0.189512	3.44604e-05	0.000379318
Rcsd1	55.061	-1.11384	0.31223	3.45476e-05	0.000380023
Adap2os	10.3533	-2.58314	0.7651	3.46039e-05	0.000380388
Dram1	500.585	0.618186	0.161669	3.50082e-05	0.000384576
Tifa	69.0454	-1.14632	0.322764	3.50819e-05	0.000385128
Gnl3	1409.19	0.495251	0.126545	3.52977e-05	0.000387239
Pycrl	229.967	0.700498	0.186156	3.54704e-05	0.000388873
Dapk1	380.327	-0.624328	0.164039	3.5595e-05	0.000389979
Tpcn1	230.374	-0.650222	0.171736	3.59803e-05	0.000393939
Rassf9	10.0839	-2.73225	0.815607	3.63821e-05	0.000398073
Fasn	567.897	0.555552	0.143887	3.70034e-05	0.000404602
Rpl36al	9663.87	0.44125	0.111893	3.70524e-05	0.000404868
Akr1b3	1025.68	0.538284	0.138886	3.75909e-05	0.000410207
Amotl1	1493.27	-0.521625	0.134622	3.7569e-05	0.000410207
March5	1238.19	0.475289	0.121547	3.77132e-05	0.000411269
Clptm1l	1281	0.464259	0.118384	3.791e-05	0.000413141
Chchd1	2122.41	0.470831	0.119813	3.7947e-05	0.00041327
Nckap5	39.3056	-1.36482	0.395005	3.80798e-05	0.000414443
Slc44a2	745.449	0.586636	0.153402	3.81079e-05	0.000414473
Kcng4	9.72033	-2.88329	0.85571	3.81345e-05	0.000414489
Atp6v0e2	16.262	-1.92337	0.569946	3.82535e-05	0.000415508
Pls3	1902.31	0.494488	0.126715	3.84115e-05	0.000416949
Irx3	63.3895	1.21085	0.342449	3.84751e-05	0.000417363
Smyd5	141.627	0.792052	0.214389	3.88065e-05	0.000420681
Jup	517.802	-0.70085	0.187681	3.90256e-05	0.000422777
P4ha3	1330.63	0.590057	0.154554	3.91688e-05	0.000424049
Vstm4	574.725	-0.751848	0.203406	3.94552e-05	0.000426588
Myl12b	1984.58	-0.506093	0.130807	3.94416e-05	0.000426588
Mtss1	200.08	-0.851394	0.23336	3.97724e-05	0.000429736
Slc1a2	68.0863	1.24898	0.357757	4.00439e-05	0.000432385
Srp9	4622.05	0.497121	0.127872	4.00924e-05	0.000432624
Cttnbp2	16.4422	-2.0238	0.603845	4.05062e-05	0.000436803
Gnl1	771.972	0.540328	0.140747	4.09197e-05	0.000440973
Ntm	67.7763	-1.05726	0.298551	4.152e-05	0.000447149
Ypel3	2300.87	-0.582208	0.153158	4.18505e-05	0.000450413
Pum3	484.303	0.588627	0.155069	4.20568e-05	0.000452338
Enpep	60.1361	-1.05295	0.299403	4.24434e-05	0.000456197
Vwa5a	824.804	-0.485126	0.125235	4.25501e-05	0.000457045
Magoh	1815.48	0.477378	0.122818	4.2736e-05	0.000458742
Atp5b	5507.89	0.461246	0.118489	4.29397e-05	0.000460628
Stard4	178.073	0.798584	0.217266	4.32134e-05	0.000463263
Srsf2	2462.18	0.542134	0.141589	4.35499e-05	0.000466566
9530082P21Rik	76.1957	-1.01058	0.28622	4.37411e-05	0.000468309
Gpihbp1	243.888	-0.418312	0.921725	4.39766e-05	0.000470524
Vti1b	965.743	0.51818	0.135097	4.42516e-05	0.000473159
Farsa	272.039	0.640102	0.170586	4.46524e-05	0.000477134
Rrp9	175.607	0.753057	0.205035	4.5015e-05	0.000480695
Glrx2	1152.33	0.483093	0.125151	4.51439e-05	0.000481448
2700081O15Rik	445.22	-0.558858	0.146904	4.51419e-05	0.000481448
Sash1	1149.05	-0.5622	0.148267	4.52723e-05	0.000482503
Commd2	703.895	0.5668	0.149099	4.55773e-05	0.00048544
Cenpm	298.616	0.678505	0.182828	4.56821e-05	0.000486241
Naa50	1567.68	0.504328	0.13133	4.69663e-05	0.000499586
Tsfm	500.969	0.550955	0.144965	4.70314e-05	0.000499956
Psmd1	1291.17	0.455421	0.117459	4.72454e-05	0.000501906
Bmp5	665.582	-0.725366	0.197685	4.75479e-05	0.000504794
Ier2	6838.14	0.489739	0.127231	4.82736e-05	0.000512167
Tmem176a	1826.89	0.637447	0.171091	4.83328e-05	0.000512464
Stc2	84.587	1.47633	0.43784	4.83883e-05	0.000512723
Nr4a3	263.543	0.715183	0.194031	4.88577e-05	0.000517363
Ptprr	6.92459	-4.03216	1.19552	4.91302e-05	0.000519914
Rcn1	4345.84	0.430602	0.110709	4.97056e-05	0.000525665
Psmd8	2678.88	0.446619	0.114603	4.99738e-05	0.000528161
Clec4a1	36.6024	-1.8616	0.562483	5.01008e-05	0.000529164
Tmem178b	33.6939	-1.32868	0.392064	5.02997e-05	0.000530923
Tek	158.238	-0.789078	0.219301	5.09171e-05	0.000536751
Rab4b	1011.46	0.48579	0.126867	5.0888e-05	0.000536751
Ebf2	1162.9	-0.520885	0.13706	5.09944e-05	0.000537222
Cd48	37.0526	-1.79546	0.543151	5.11497e-05	0.000538513
Tbxas1	19.084	-1.83998	0.557022	5.12614e-05	0.000539343
Gnpda1	153.752	-0.74939	0.206107	5.14713e-05	0.000541206
Slc41a2	274.099	0.642248	0.172892	5.18012e-05	0.000544326
Hck	25.5279	-1.92219	0.586269	5.21066e-05	0.000546918
Fgf16	21.7236	-1.69797	0.514469	5.21143e-05	0.000546918
Rin2	878.744	-0.492295	0.129005	5.22156e-05	0.000547631
Mesd	801.951	0.493732	0.129246	5.22563e-05	0.000547708
Dbn1	1473.32	0.501818	0.131701	5.27024e-05	0.000551681
Abhd4	372.658	-0.575863	0.153627	5.27011e-05	0.000551681
Tlr4	162.075	-0.707573	0.19356	5.29435e-05	0.000553852
Prickle2	190.357	-0.719171	0.197467	5.42085e-05	0.000566725
Polr1e	78.6099	0.998909	0.285311	5.49908e-05	0.000574379
Zfp874b	58.9833	-1.08016	0.314826	5.50105e-05	0.000574379
Dusp12	414.523	0.590912	0.158244	5.52411e-05	0.000576421
Med29	714.669	0.551122	0.146621	5.54602e-05	0.00057834
Efcab2	79.1283	-1.01192	0.292976	5.56589e-05	0.000580044
Aacs	190.868	0.72376	0.198616	5.58365e-05	0.000581527
Fgfrl1	356.245	0.59529	0.159991	5.61352e-05	0.000584268
Tspan2	112.272	-0.842483	0.23728	5.64118e-05	0.000586775
Nufip1	273.065	0.690053	0.189087	5.64842e-05	0.000587157
Frmd6	1348.34	-0.49262	0.129693	5.65978e-05	0.000587967
Wsb2	767.256	0.490433	0.129106	5.67485e-05	0.00058916
Tysnd1	312.351	0.671196	0.18351	5.68031e-05	0.000589354
Itpkb	709.796	-0.527613	0.139999	5.73277e-05	0.000594423
Dnpep	967.862	0.542311	0.144477	5.74328e-05	0.000594762
Dynll2	1547.4	0.45266	0.118177	5.73989e-05	0.000594762
Plscr2	426.464	0.661619	0.180684	5.76112e-05	0.000596234
Il10	49.604	-1.26435	0.374304	5.77919e-05	0.000597729
Lactb	350.214	0.572842	0.153494	5.79209e-05	0.000598686
Dcaf12l1	78.5324	-0.908419	0.259482	5.82424e-05	0.000601631
Abtb1	106.304	-0.83712	0.236689	5.92323e-05	0.000611472
Sh3bp5	222.411	-0.664393	0.181804	5.97692e-05	0.000616627
Ifi206	11.7424	-2.38844	0.744267	6.00872e-05	0.000619131
Pld1	156.107	-0.708187	0.195929	6.00845e-05	0.000619131
Chid1	691.234	0.562939	0.151096	6.02903e-05	0.000620835
Timm17b	1096	0.488883	0.129226	6.03803e-05	0.000621373
Cnn3	5079.06	0.484424	0.127775	6.0508e-05	0.000621985
Acta2	8646.24	1.55696	0.47162	6.05154e-05	0.000621985
B2m	10842.9	-0.466637	0.122865	6.07206e-05	0.000623333
Pik3ip1	313.633	-0.627335	0.170939	6.07224e-05	0.000623333
Nus1	1113.96	0.543437	0.145203	6.07756e-05	0.000623345
Vit	23.9213	-1.96042	0.613705	6.07994e-05	0.000623345
Gpr34	26.2489	-1.9003	0.585893	6.08692e-05	0.000623673
Ccrl2	209.598	-0.783465	0.21921	6.10972e-05	0.000625619
Flcn	161.045	-0.723202	0.200738	6.26035e-05	0.000640644
Psmd14	764.142	0.51208	0.136251	6.28649e-05	0.000642919
Cyp4b1	14.4917	-2.44514	0.769741	6.30714e-05	0.00064343
Prtg	64.4388	-1.01229	0.294596	6.30593e-05	0.00064343
Lgals3bp	1979.88	-0.45177	0.118932	6.29915e-05	0.00064343
Fhod3	60.3355	1.17779	0.348842	6.30358e-05	0.00064343
Neo1	1304.56	0.481893	0.127389	6.32038e-05	0.00064438
Reln	11.5284	-2.41907	0.759281	6.34021e-05	0.000646003
Ncs1	315.77	0.634437	0.1731	6.38739e-05	0.000650033
Enho	122.459	-0.869254	0.247877	6.3913e-05	0.000650033
Ptprb	137.769	-3.43379	1.12292	6.39163e-05	0.000650033
Slc25a25	290.248	0.606871	0.164869	6.46737e-05	0.00065733
Plekha7	43.2778	1.39126	0.412601	6.50849e-05	0.0006611
Wdr74	281.387	0.721059	0.200396	6.58621e-05	0.000668582
A930001M01Rik	31.1711	-1.51078	0.461433	6.60887e-05	0.000670468
Grem2	53.723	1.54177	0.461252	6.62484e-05	0.000671674
Cadm1	17.1684	-2.11118	0.666028	6.63032e-05	0.000671816
Pno1	330.614	0.657951	0.180768	6.63806e-05	0.000672185
Spcs1	4090.48	0.408376	0.106496	6.65426e-05	0.000673411
Rwdd1	2524.07	0.445163	0.116432	6.67273e-05	0.000674865
Gm4070	13.0305	-2.33089	0.74007	6.67747e-05	0.000674929
Pole3	833.841	0.482645	0.128342	6.74757e-05	0.000681178
Tsc22d3	582.444	-0.666018	0.183786	6.74695e-05	0.000681178
Fmo5	78.633	-0.926527	0.269036	6.79539e-05	0.000685584
Ccr5	21.1248	-1.78359	0.550465	6.80962e-05	0.000686598
Ankrd29	109.577	0.951197	0.275979	6.8259e-05	0.000687818
Fuom	611.807	0.624196	0.171236	6.90329e-05	0.000694766
Map3k11	112.031	-0.842096	0.241271	6.90198e-05	0.000694766
Slc11a1	29.8149	-1.6315	0.504639	6.92552e-05	0.000696576
Metrnl	934.645	0.465366	0.123508	6.94012e-05	0.000697617
Mrps25	803.178	0.526026	0.141453	6.96223e-05	0.000699412
Rnf19b	1314.32	0.636753	0.175017	6.99237e-05	0.000701583
Sh2b3	192.848	-0.697244	0.194278	6.99018e-05	0.000701583
Ccdc58	366.185	0.555863	0.150312	7.00213e-05	0.000701711
Kcnj15	259.899	0.743311	0.208591	7.00217e-05	0.000701711
Ccdc62	102.679	0.878268	0.250864	7.04729e-05	0.000705373
Tnip3	18.8049	-1.97587	0.613697	7.04341e-05	0.000705373
Map1b	1839.5	0.589329	0.160679	7.05639e-05	0.000705853
Scarb1	115.977	-0.803937	0.22937	7.08825e-05	0.00070861
Sigirr	16.7441	-1.98852	0.625281	7.10249e-05	0.000709602
Alyref	1340.99	0.54872	0.148221	7.13049e-05	0.000711967
Wscd1	5.98535	-4.43152	1.28419	7.17374e-05	0.00071585
Arhgap18	205.838	-0.64815	0.179234	7.20783e-05	0.000718816
Agpat5	530.37	0.507334	0.136118	7.22025e-05	0.000719182
Prep	299.7	0.585894	0.159683	7.21871e-05	0.000719182
Hif3a	7.01292	-3.37599	1.05575	7.23169e-05	0.000719885
Gpatch4	203.586	0.845424	0.24263	7.27107e-05	0.000723368
Stk16	764.835	0.561574	0.151945	7.28347e-05	0.000724163
Slc7a8	47.4433	-1.17058	0.351539	7.28954e-05	0.000724329
Stag2	837.009	-0.486507	0.130199	7.31379e-05	0.0007263
St3gal5	562.351	0.617497	0.169563	7.38431e-05	0.000732706
Exosc5	528.587	0.584609	0.159498	7.38782e-05	0.000732706
Cd209a	15.2779	-2.85077	0.902856	7.39166e-05	0.000732706
Tlr7	19.6926	-1.93397	0.609544	7.39627e-05	0.000732721
Arhgef19	153.569	0.762066	0.214667	7.43128e-05	0.000735745
Gal3st1	27.0377	1.78792	0.547391	7.45249e-05	0.000737402
Nup50	623.162	0.504346	0.13542	7.47115e-05	0.000738804
Yars	320.848	0.57249	0.156384	7.64187e-05	0.000755232
Mtap	493.705	0.648511	0.179838	7.6783e-05	0.000758376
Nmi	424.619	-0.580316	0.159297	7.6913e-05	0.000759204
Kcng2	70.3275	1.07186	0.316811	7.77061e-05	0.000766573
Bmp7	13.6105	-2.54694	0.828957	7.79157e-05	0.00076818
Ncam1	1739.7	0.736873	0.208158	7.80997e-05	0.000769533
Pakap	73.4762	1.04187	0.307951	7.82969e-05	0.000771013
Plp1	60.3029	-1.17114	0.353572	7.86277e-05	0.000773807
Pid1	369.758	-0.592614	0.163326	7.91621e-05	0.000778136
Atp5h	7787.27	0.433699	0.114858	7.91337e-05	0.000778136
Gas2	600.561	0.507297	0.137047	7.94571e-05	0.000780569
Leng8	447.343	-0.518547	0.140669	7.96267e-05	0.000781768
Mlf1	286.702	0.660791	0.184902	8.0108e-05	0.000786023
Dnajb9	1226.14	0.434817	0.115739	8.01973e-05	0.000786431
Dbndd2	167.762	-0.785982	0.225612	8.0668e-05	0.00078934
Thoc6	288.07	0.605121	0.167123	8.0686e-05	0.00078934
Slc39a6	631.957	0.550808	0.149912	8.0583e-05	0.00078934
Sat1	1876.45	-0.458982	0.122953	8.06689e-05	0.00078934
Dnajc1	2206.11	0.40563	0.107496	8.21693e-05	0.000803373
Entpd6	187.038	0.771512	0.219232	8.23123e-05	0.000804293
St6galnac2	49.1313	-1.11325	0.336302	8.23903e-05	0.000804577
Pml	205.345	-0.629095	0.175146	8.26681e-05	0.000806332
Lcp1	125.204	-1.11882	0.336614	8.26636e-05	0.000806332
Ntn1	117.99	-0.823857	0.238768	8.31411e-05	0.000810432
Eef1e1	233.114	0.750342	0.213311	8.31869e-05	0.000810432
Vdac1	2209.83	0.471754	0.126896	8.32848e-05	0.000810905
Cad	418.219	0.588864	0.16255	8.37733e-05	0.000815179
Ctso	421.224	-0.524283	0.142833	8.39129e-05	0.000816054
Narf	285.344	0.650802	0.181506	8.47796e-05	0.000823995
Rnf182	12.7938	-2.27553	0.724666	8.48729e-05	0.000824415
Mpc1	2510.55	0.492517	0.132533	8.50735e-05	0.000825876
Clk1	1973.3	-0.506837	0.137552	8.51941e-05	0.000826559
Ncoa2	376.023	-0.585835	0.161766	8.52732e-05	0.000826839
Lilr4b	65.6781	-1.33404	0.410541	8.64982e-05	0.000838223
Hmgcs2	11.4311	-2.22888	0.720857	8.68708e-05	0.000841337
Tmem100	363.736	-0.740215	0.21206	8.69361e-05	0.000841474
Mxra7	3804.62	0.533178	0.145504	8.70189e-05	0.000841779
Sec13	1893.73	0.446689	0.119613	8.8314e-05	0.000853806
Npm1	15981.5	0.446573	0.119883	8.85046e-05	0.000855145
Pde2a	51.9677	-1.17996	0.359731	8.92611e-05	0.000861702
Cyp4f18	18.7774	-2.07285	0.662374	8.93386e-05	0.000861702
Tcf25	2730.88	0.410423	0.109514	8.93874e-05	0.000861702
Chka	532.764	0.539231	0.14769	8.93927e-05	0.000861702
Oaf	6003.46	0.497642	0.135294	8.95265e-05	0.000862486
Cx3cr1	49.0983	-1.31114	0.403922	8.96435e-05	0.000863108
Angpt2	21.4112	-1.58798	0.501331	8.99585e-05	0.000865329
Med9	487.073	0.543125	0.149283	8.99794e-05	0.000865329
Osm	35.0222	-1.89328	0.608946	9.07579e-05	0.000872305
Gsap	69.6009	-1.09691	0.333467	9.11599e-05	0.000875657
Nelfe	615.216	0.518623	0.141945	9.14034e-05	0.000877483
Zfyve1	235.599	-0.660993	0.187261	9.15874e-05	0.000878736
Snd1	949.511	0.464956	0.125645	9.18087e-05	0.000880347
Hoxd3os1	36.8942	-1.22626	0.377788	9.2501e-05	0.000886468
Casq2	15.0786	-2.5763	0.845533	9.25957e-05	0.000886858
Dnajc2	686.084	0.505923	0.137997	9.2719e-05	0.000887105
Ddx21	1018.14	0.585151	0.162582	9.27293e-05	0.000887105
Depp1	10.9576	-3.09719	1.02771	9.27969e-05	0.000887235
Txndc5	5793.16	0.413378	0.110611	9.28528e-05	0.000887254
Loxl4	26.931	1.72308	0.534307	9.3636e-05	0.000894218
Eif4a3	910.642	0.470136	0.127578	9.4085e-05	0.000897985
Aurkaip1	1918.55	0.514349	0.140747	9.41641e-05	0.000898219
Arpc5	3213.54	0.496869	0.135459	9.43543e-05	0.000899511
Ube2l3	2506.09	0.430983	0.115111	9.46969e-05	0.000902254
Mettl9	1530.85	0.422439	0.113414	9.5209e-05	0.000906608
Gm15261	67.1279	-1.01681	0.306394	9.62955e-05	0.000916423
Abca3	106.25	-0.798226	0.233228	9.6386e-05	0.000916754
Tmem204	279.058	-0.801559	0.233787	9.65749e-05	0.00091802
Fli1	248.462	-0.737506	0.212063	9.69474e-05	0.000921028
Cd53	88.263	-2.19775	0.722729	9.70507e-05	0.000921478
S1pr4	5.18645	-4.87504	1.62126	9.80811e-05	0.000930724
Best1	80.7001	-0.884923	0.262606	9.83125e-05	0.000932382
Pdcd5	2627.54	0.426327	0.114697	9.85995e-05	0.000934564
Sp3	998.628	-0.459972	0.124935	9.90999e-05	0.000938766
Stub1	2240.33	0.427008	0.114761	9.93655e-05	0.00094074
Ddx39	436.846	0.574672	0.160161	9.95397e-05	0.000941847
Pik3r2	483.274	-0.578157	0.161488	0.000100438	0.000949804
Nuak1	317.246	0.7178	0.20586	0.000101458	0.000958892
Mrpl14	1642.51	0.434138	0.117385	0.000101956	0.000963045
Eloc	2726.81	0.413563	0.111346	0.000102753	0.000970017
Hmgn1	6893.3	0.420121	0.113213	0.000103172	0.000973417
Cd52	296.929	-1.68263	0.544318	0.000103245	0.00097355
Layn	405.22	0.654306	0.186199	0.000103682	0.000976831
Tmem115	481.373	0.553621	0.154156	0.000103712	0.000976831
Fam126b	144.262	-0.72091	0.208093	0.000103949	0.000978503
Pmvk	433.487	0.640067	0.181274	0.000104021	0.000978618
Rpl7l1	902.576	0.485047	0.132996	0.000104101	0.000978816
Nfkbid	23.5755	-1.50603	0.479176	0.000104427	0.000981314
Arsb	778.7	-0.476861	0.130537	0.000104823	0.000984472
Tubb5	9002.76	0.419076	0.113254	0.000105393	0.000989264
Pycr2	458.626	0.531605	0.147262	0.00010552	0.000989886
Dctd	171.874	0.744361	0.215032	0.000105599	0.00099007
Zfp503	954.544	-0.504927	0.139256	0.000105926	0.000992563
Gprin3	117.879	1.00127	0.303544	0.000107638	0.00100803
Ddx54	524.427	0.530361	0.147378	0.000107992	0.00101077
Rpsa	63018.6	0.500369	0.138095	0.000108628	0.00101615
Zfp182	89.8579	-0.912307	0.275357	0.000108781	0.001017
Itpr2	835.174	0.454199	0.123976	0.000108929	0.00101722
Gm48617	39.9291	-1.26072	0.393893	0.000108897	0.00101722
Phf21a	571.69	-0.531285	0.147498	0.00010904	0.00101743
Mrpl49	398.043	0.569152	0.15955	0.000109075	0.00101743
Robo4	41.9663	-0.372201	0.751631	0.000109689	0.00102259
Nagk	1090.21	0.481885	0.132487	0.000109827	0.00102329
Gm44732	9.12005	-2.53313	0.839774	0.000110008	0.00102351
Cdk12	1003.82	0.499521	0.13802	0.0001101	0.00102351
Psmd3	946.185	0.552593	0.154471	0.000109983	0.00102351
Cenpx	1421.37	0.587076	0.165435	0.000110086	0.00102351
Gprasp2	84.3165	-0.913385	0.275613	0.000110169	0.00102357
Rps27	32793.2	-0.499641	0.138112	0.000110772	0.00102802
Atp2a3	10.2207	-2.3653	0.775976	0.000110746	0.00102802
Panx1	376.292	0.600914	0.169565	0.000110884	0.00102847
Triobp	545.416	-0.562328	0.157896	0.00011106	0.00102953
Pa2g4	1012.94	0.50327	0.139287	0.000111378	0.00103189
Dohh	541.003	0.507694	0.140571	0.000111657	0.0010339
Ddit4	339.792	0.658688	0.188482	0.000111981	0.00103631
Prdm1	26.3348	-1.45006	0.463174	0.000112248	0.0010382
Cdc16	1386.04	0.470427	0.12906	0.000113035	0.00104489
Psph	176.353	0.715193	0.20783	0.000113612	0.00104964
Tns2	386.702	-0.628014	0.179291	0.000114116	0.0010537
Gm12695	37.8798	-1.19468	0.375632	0.000114849	0.00105987
Fam107b	232.284	0.725881	0.211426	0.000115231	0.0010628
Tmem164	243.845	-0.636782	0.182141	0.000115618	0.00106577
Gins2	287.201	0.581149	0.164071	0.00011619	0.00107012
Rce1	537.58	0.547171	0.153205	0.000116219	0.00107012
Eps8	574.246	-0.465875	0.128294	0.000116719	0.00107411
Srp19	2133.18	0.441292	0.120159	0.000116885	0.00107504
Ndufb8	3076.7	0.435704	0.118442	0.000117055	0.001076
Spta1	22.1881	1.98436	0.626419	0.000117252	0.00107721
Spred2	342.301	-0.555633	0.156257	0.000117477	0.00107868
Lars	666.428	0.559442	0.157402	0.000117949	0.00108241
AI427809	63.4413	-0.97981	0.299498	0.000119041	0.00109182
Gm43221	84.0861	-0.98586	0.303622	0.000119183	0.00109251
Wdr46	149.198	0.742381	0.217158	0.000119883	0.00109831
Sez6l2	11.2344	-2.4646	0.832674	0.000120156	0.00110021
Htra2	736.214	0.505446	0.140749	0.000120737	0.00110491
Gm16133	62.0356	1.28086	0.401882	0.000121308	0.00110951
Rps19bp1	601.938	0.500722	0.139137	0.000121887	0.00111419
Tex261	1548.07	0.451917	0.124355	0.000122959	0.00112274
Arhgap6	210.28	-0.69308	0.202233	0.000122927	0.00112274
Spock2	83.6532	-0.932131	0.285435	0.00012382	0.00112998
Pnpla7	109.777	-0.807703	0.241122	0.000126325	0.0011522
Cfd	36.6209	7.46311	3.36594	0.000126834	0.0011562
Ctcflos	17.1398	2.42706	0.783771	0.00012702	0.00115725
Colgalt1	3502.5	0.398732	0.108713	0.000127108	0.00115741
Gxylt2	2622.4	-0.463101	0.128457	0.000128381	0.00116836
Fkbp2	2335.17	0.556468	0.157523	0.000128754	0.00117111
Gab2	235.16	-0.655593	0.189808	0.000128957	0.00117231
Bok	351.834	0.638733	0.18374	0.000129151	0.00117341
Copb1	1984.55	0.43418	0.119007	0.000129402	0.00117505
Cpne5	8.63766	-3.00264	1.0159	0.000130181	0.00118147
Tyms	645.926	0.509331	0.142537	0.000130606	0.00118468
Arhgap21	770.591	-0.478661	0.133369	0.000130872	0.00118513
Zfp608	557.913	-0.476342	0.132539	0.000130853	0.00118513
Drap1	3326.71	0.407524	0.111568	0.000130762	0.00118513
Dnah12	49.8074	1.35358	0.438184	0.000131173	0.00118719
Kmt5a	785.531	0.506688	0.141949	0.000131798	0.0011922
Cyb5r3	2737.09	0.416464	0.114217	0.000132169	0.0011949
Slamf7	18.3982	-1.95754	0.647803	0.000133335	0.00120478
Gzme	167.716	2.5718	0.877819	0.000133496	0.00120557
Mrpl15	1105.67	0.45403	0.125892	0.000135493	0.00122294
Clec11a	1767.51	0.722376	0.213226	0.000135844	0.00122543
Ndrg4	405.137	0.566367	0.161129	0.000136066	0.00122652
Gadd45g	11923.5	0.408188	0.112042	0.000136189	0.00122652
Myo10	1028.84	0.487992	0.136291	0.000136143	0.00122652
Wdfy4	50.1445	1.29339	0.413636	0.000136778	0.00123115
Gm41724	183.863	0.698768	0.20447	0.000137191	0.00123419
Spon1	1402.34	0.633342	0.182209	0.00013782	0.00123917
Copg1	1510.08	0.432048	0.119269	0.000137998	0.00124009
Dennd1b	315.148	-0.550002	0.156378	0.000139184	0.00125007
Csf2rb	24.5908	-1.59535	0.524774	0.000139438	0.00125166
9330188P03Rik	10.1335	-2.30182	0.780956	0.00014009	0.00125683
Trmt6	308.992	0.564797	0.161162	0.000140193	0.00125707
Dab2	937.711	-0.499873	0.140403	0.000140978	0.00126342
Mcub	491.907	0.498522	0.140073	0.000141755	0.00126908
A730056A06Rik	131.991	-0.718046	0.213032	0.000141763	0.00126908
Prrt1	16.6436	-1.74075	0.577618	0.000142712	0.00127687
Tspan4	1680.36	0.569604	0.162972	0.000142817	0.00127709
Tceal8	2959.06	0.429237	0.11875	0.000142892	0.00127709
Medag	2253.56	0.4344	0.11983	0.000143196	0.00127843
Rnf187	1275.64	0.486149	0.136454	0.000143144	0.00127843
Taok2	372.325	-0.513026	0.145101	0.000143381	0.00127869
Gm16536	56.1204	-0.988102	0.307974	0.000143317	0.00127869
Utp14b	202.244	0.654772	0.190721	0.000143833	0.00128202
Lrrc8c	188.191	-0.779899	0.234177	0.000144375	0.00128615
Atic	670.813	0.471569	0.131863	0.000144868	0.00128985
Begain	111.287	-0.779261	0.235049	0.000146255	0.00130149
Dchs2	43.8113	-1.16707	0.375315	0.000146414	0.0013015
Gm26512	38.0973	-1.33482	0.434185	0.000146337	0.0013015
Snrpb	3384.18	0.42847	0.118359	0.000147	0.00130601
Spr	632.091	0.510959	0.144731	0.000148926	0.0013224
Stab1	135.373	-0.918075	0.283548	0.000149168	0.00132383
Shc1	900.791	-0.4539	0.126952	0.000150226	0.0013325
Nsun7	33.8499	-1.26716	0.40902	0.000150615	0.00133524
Tssc4	648.593	0.521904	0.148265	0.000151403	0.0013415
Gm38843	6.98396	-4.49774	1.4495	0.000151588	0.00134242
Ociad2	152.151	-0.795726	0.240822	0.000151741	0.00134305
Znfx1	199.955	-0.626633	0.183224	0.000152725	0.00135102
Ptn	26159.1	-0.486834	0.137413	0.000153925	0.00136092
Cdk4	2644.73	0.462163	0.129661	0.0001542	0.00136261
Exosc8	547.519	0.529495	0.151158	0.000154395	0.0013636
2610528A11Rik	16.4499	3.04286	0.971552	0.000155291	0.00137032
Psat1	222.214	0.618444	0.179606	0.000155322	0.00137032
Arfip2	744.382	0.551336	0.1584	0.000156118	0.0013766
Polb	589.217	0.569447	0.164134	0.000157467	0.00138775
Adgrd1	423.368	0.644761	0.189559	0.000158518	0.00139627
Il10ra	22.4439	-1.85881	0.63182	0.000159326	0.00140198
Mthfd1	153.514	0.733714	0.219056	0.000159337	0.00140198
Slc9a3r2	455.414	-0.703148	0.209927	0.000159451	0.00140223
Bicc1	4014.42	-0.400788	0.111211	0.000159829	0.0014048
Srebf2	533.135	0.567987	0.163633	0.000161985	0.00142299
Psmb4	4410.99	0.477742	0.135111	0.00016273	0.00142801
Trib2	424.163	-0.50734	0.144555	0.000162684	0.00142801
Rfc2	618.553	0.481782	0.136273	0.000162931	0.00142901
Tln1	2771.62	0.495623	0.141093	0.000163148	0.00143016
Shox2	1365.79	0.445202	0.124786	0.000163765	0.0014348
Spryd3	325.992	0.577647	0.167623	0.000164004	0.00143612
Arhgap9	17.7315	-1.71715	0.579359	0.000165239	0.00144617
Agap1	437.834	-0.589904	0.171984	0.000165424	0.00144647
H19	24755.3	-0.44387	0.125087	0.000165449	0.00144647
Usp29	15.8237	-1.75305	0.598858	0.000166811	0.0014576
Capn5	80.0191	-0.853404	0.264147	0.000167352	0.00146079
Myzap	57.1112	-0.948782	0.298335	0.000167353	0.00146079
Dtnbp1	1181.5	0.557373	0.16117	0.000167593	0.00146211
Nr2f2	672.362	-0.503358	0.143639	0.000168353	0.00146796
Hars	601.726	0.547065	0.157535	0.000168457	0.00146809
Sdc4	779.541	0.759024	0.229555	0.000168965	0.00147173
Dipk2b	4.60979	-4.73277	1.64223	0.000169425	0.00147496
Mrps23	553.909	0.498783	0.142125	0.000171984	0.00149644
Prkcb	15.0221	-2.04452	0.705724	0.000172992	0.00150441
Htr2a	61.5709	1.14568	0.36447	0.000173771	0.0015104
Fos	31527.7	-0.35778	0.102559	0.000176062	0.0015295
Fbxo36	287.749	0.689977	0.206657	0.000176895	0.00153593
Nckap1l	32.6302	-1.42434	0.473677	0.000177103	0.00153692
Gm28875	75.4613	-0.965191	0.305486	0.000178324	0.00154669
Tesc	8.70113	-2.91746	1.00911	0.000179391	0.00155513
Boc	541.184	-0.585412	0.171546	0.000180485	0.00156379
Ifi27	5639.36	0.437567	0.123574	0.000182389	0.00157946
Timm50	557.219	0.563521	0.164301	0.000183132	0.00158506
Gemin7	1230.97	0.419538	0.118084	0.000183939	0.0015912
Pkn1	309.482	-0.544141	0.158334	0.000185585	0.0016046
Rhoc	4679.08	0.442912	0.125521	0.000186706	0.00161175
Trip11	1240.87	0.431464	0.121909	0.000186633	0.00161175
Tmem134	1818.69	0.471797	0.134646	0.000186679	0.00161175
Ccdc3	144.316	-0.910136	0.287658	0.000186977	0.00161324
Tdp2	378.259	-0.521179	0.150493	0.000187331	0.00161545
Sae1	940.327	0.443026	0.125626	0.000187623	0.00161712
Irs1	371.846	-0.536504	0.155555	0.00018875	0.00162598
Arpc2	5553.98	0.382108	0.106318	0.000189735	0.00163292
Gprc5b	231.184	-0.632815	0.188449	0.000189754	0.00163292
Elmo1	157.3	-0.772609	0.236877	0.000190378	0.00163743
Ccdc186	1006.88	0.466089	0.133027	0.000191048	0.00164234
Btbd1	876.268	0.458137	0.130541	0.000191269	0.00164337
Pax7	29.5694	-1.83261	0.631005	0.000191489	0.0016444
Ikbip	2801.12	0.398053	0.111821	0.000192936	0.00165596
Klf6	10104.7	0.461915	0.131863	0.000194156	0.00166557
Clint1	1938.69	0.48076	0.137546	0.000194433	0.00166707
Hlx	104.501	-0.80226	0.249558	0.000195718	0.0016764
Ssu72	1516.52	0.415658	0.117384	0.000195725	0.0016764
Erfe	28.3567	1.5325	0.508542	0.000196389	0.00168122
Napb	35.6005	-1.20777	0.401129	0.000197287	0.00168803
Zfp97	29.1505	-1.40595	0.481531	0.000198464	0.00169721
Alpl	33.1377	-3.06918	1.13512	0.000198929	0.0017003
Inpp5d	31.2357	-1.52464	0.520399	0.000199277	0.0017024
Nip7	554.125	0.528941	0.153843	0.000200003	0.00170771
Mphosph6	616.99	0.48035	0.138148	0.000201554	0.00172006
Gart	315.267	0.573234	0.168443	0.000201788	0.00172116
Ptbp1	1585.14	0.479025	0.137652	0.000202712	0.00172815
Trim12c	253.019	-0.629441	0.187851	0.000203259	0.00173192
Prrx2	2271.4	0.562902	0.165469	0.000204445	0.00174111
Zfp780b	85.2096	-0.835939	0.263121	0.000206497	0.00175768
4831440D22Rik	17.1351	-1.66704	0.581176	0.000207382	0.00176431
Tmem29	496.625	0.512035	0.148795	0.000207635	0.00176554
Tmem214	989.532	0.414492	0.117559	0.000208031	0.00176708
Slc39a7	2002.45	0.46311	0.132964	0.000207927	0.00176708
Ctsf	665.232	-0.61111	0.182508	0.000208321	0.00176863
Srsf7	1702.94	0.520354	0.151489	0.000209737	0.00177973
Rnaseh2c	1549.11	0.434174	0.123742	0.000209949	0.00178061
Erbb3	10.5356	-2.4225	0.875843	0.000210419	0.00178368
Egln3	70.8811	2.3419	0.834311	0.000210624	0.0017845
Bcar1	288.126	0.588234	0.173823	0.000210853	0.00178552
Abce1	800.103	0.503317	0.145653	0.000211344	0.00178875
Sept9	1007.82	-0.47975	0.138437	0.000211801	0.00179078
Eif1ad	550.077	0.488565	0.141147	0.000211785	0.00179078
Slc25a11	1003.38	0.44776	0.128344	0.000212462	0.00179544
Pgd	606.41	0.494284	0.143039	0.000213487	0.00180319
Dcun1d5	1917.79	0.406961	0.115337	0.000213765	0.00180461
Plxna4os1	11.983	-2.17385	0.770256	0.000215613	0.00181927
Hsd17b7	106.504	0.826404	0.258488	0.000216239	0.00182361
Sept11	3073.54	-0.370253	0.104364	0.000216807	0.00182747
Tns1	849.158	-0.513274	0.14997	0.000217798	0.00183488
Trim27	600.84	0.502929	0.146153	0.000218266	0.00183788
Cdc42ep3	277.044	0.629618	0.188722	0.0002188	0.00184143
Ccl4	383.183	-0.793703	0.248111	0.000219482	0.00184623
Cd55	452.145	-0.798296	0.250468	0.000220076	0.00185028
Angptl7	23.5258	-1.55052	0.536489	0.000221534	0.00186159
Prxl2a	50.5846	-1.10302	0.367392	0.000221987	0.00186444
Tnfsf11	103.465	0.905037	0.289262	0.000222433	0.00186724
Pax1	32.1392	1.49751	0.497624	0.000222999	0.00187103
Sertad2	734.562	0.482019	0.13992	0.000224089	0.00187922
Gpr132	24.9486	-1.63897	0.567173	0.000224288	0.00187993
Gpr65	30.4134	-1.54364	0.536377	0.000225163	0.0018863
Phf5a	1252.01	0.466826	0.135107	0.000226278	0.00189467
Pald1	65.662	-0.965725	0.312759	0.000226891	0.00189691
Nudt18	367.992	0.587904	0.175562	0.000226729	0.00189691
Eny2	3205.6	0.380075	0.107337	0.000226793	0.00189691
Il1rl1	97.9901	0.96671	0.312137	0.000228669	0.00190983
Ly6a	3020.26	-0.606271	0.18197	0.000228564	0.00190983
Vsir	255.348	-0.622804	0.187802	0.000228892	0.00191073
Rheb	2145.39	0.400462	0.114068	0.000229796	0.0019173
Cyp4v3	141.661	-0.691287	0.211858	0.000229995	0.00191799
Zfp846	79.2896	-0.849648	0.270848	0.00023068	0.00192272
Cyp2f2	30.8612	-1.43063	0.499394	0.000231128	0.00192548
Cisd2	1491.38	0.437504	0.125689	0.000231591	0.00192836
Cck	14.1264	2.81885	0.926476	0.00023179	0.00192901
Col6a2	14711.9	-0.436028	0.125664	0.000231903	0.00192901
Rnf121	465.139	0.49584	0.144657	0.000232171	0.00193026
Pde4dip	457.44	0.575396	0.171632	0.000234589	0.00194938
1700128A07Rik	5.98383	-3.39887	1.19084	0.000235286	0.00195418
Clip3	563.65	-0.506354	0.14852	0.000236869	0.00196633
Fam114a1	2585.3	0.396706	0.113181	0.000237054	0.00196688
Krba1	57.4981	-0.932924	0.303031	0.000237681	0.0019701
Mrpl16	476.72	0.517655	0.152055	0.000237658	0.0019701
Cd2	15.1375	-1.80462	0.64629	0.000238269	0.00197397
Mras	348.649	0.561006	0.167098	0.000238746	0.00197693
Hmga1	19.4628	-1.68068	0.600553	0.000239009	0.00197811
Gpr35	21.7047	1.98554	0.672868	0.000239289	0.00197943
Mfsd2a	23.0385	1.81041	0.635956	0.000240474	0.00198823
Pnmal2	71.9819	-0.867839	0.27833	0.000241672	0.00199713
Arhgap25	12.3933	-1.98142	0.710159	0.000242329	0.00200156
Dhdh	84.1882	-0.809214	0.256693	0.000242896	0.00200524
Dapk3	696.503	0.531356	0.15734	0.000243136	0.00200621
Cct8	2155.51	0.424675	0.12181	0.000243623	0.00200922
Spi1	76.7724	-1.2297	0.417813	0.000244914	0.00201784
Fam114a2	861.205	0.451463	0.130878	0.000244804	0.00201784
Zc3h15	2249.32	0.44551	0.128967	0.000245944	0.0020243
K230015D01Rik	36.2264	1.30085	0.441504	0.000245913	0.0020243
Myh10	1447	0.483468	0.141334	0.00024616	0.00202506
[truncated: 15,844 more rows]
